# Supplementary material for: Comparative oncogenomics identifies combinations of driver genes and drug targets in BRCA1-mutated breast cancer
Source: PubMed Central journal article supplement (PMC6344487; doi:10.1038/s41467-019-08301-2), 2019-01-23
Supplement: 41467_2019_8301_MOESM1_ESM.pdf [file 41467_2019_8301_MOESM1_ESM.pdf]

# Comparative oncogenomics identifies combinations of driver genes and drug targets in *BRCA1*-mutated breast cancer

Stefano Annunziato, Julian R de Ruyter, Linda Henneman, Chiara S Brambillasca *et al.*

## **Supplementary Information**

# Supplementary Figure 1

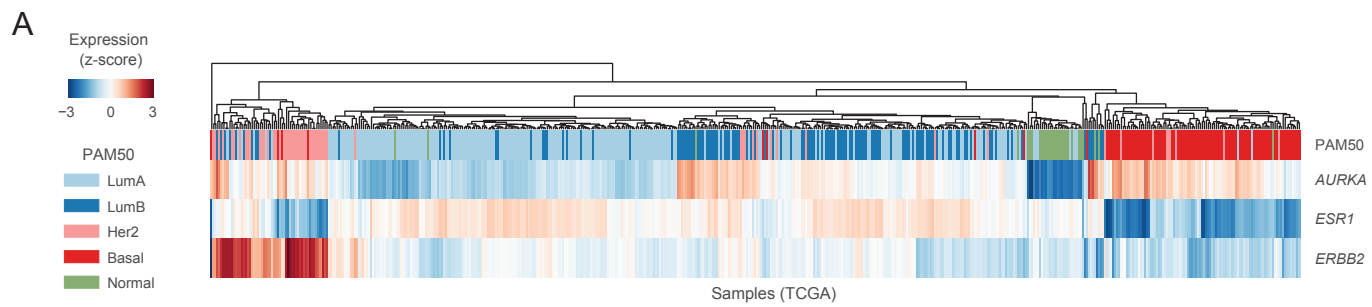

**Supplementary Figure 1. Gene expression analysis of human breast cancer samples. (A)**

Unsupervised clustering (Euclidean distance, average linkage) of the human breast cancer samples from TCGA, using a three-genes signature that distinguishes the PAM50 subtypes (26). LumA, luminal A; LumB, luminal B.

# Supplementary Figure 2

A

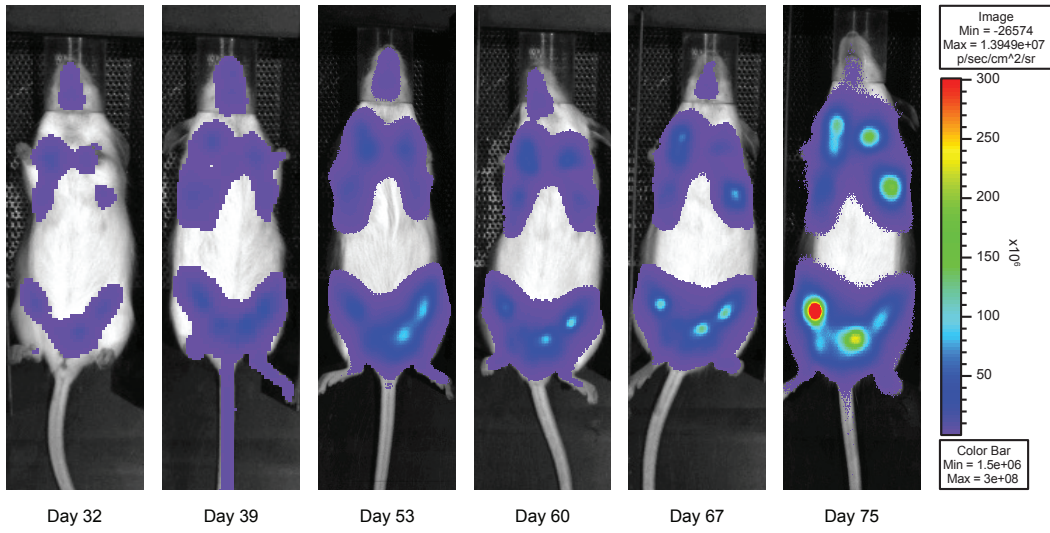

B

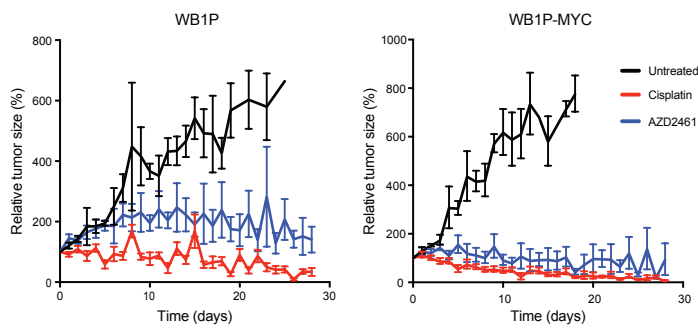

C

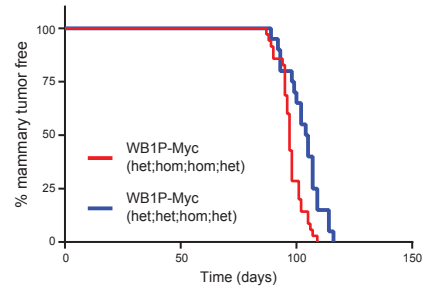

D

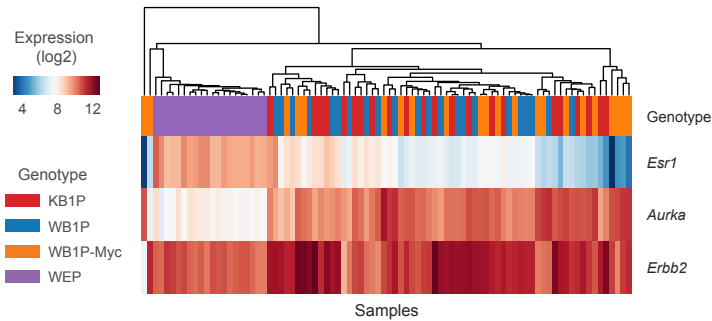

E

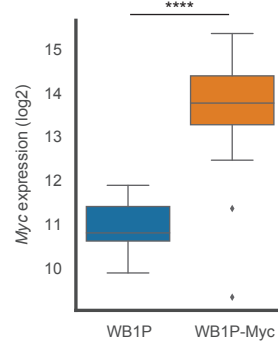

F

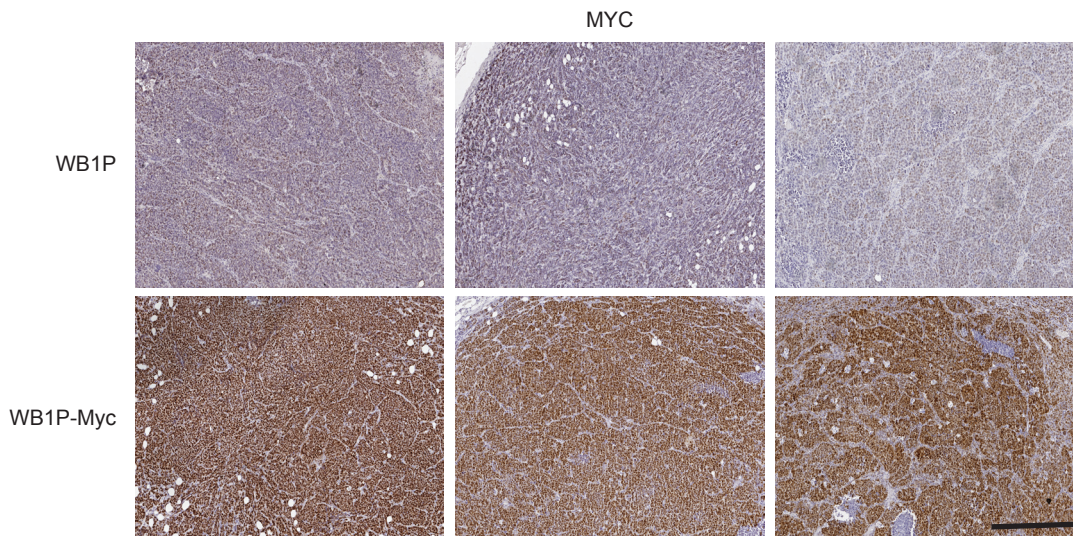



**Supplementary Figure 2. Characterization of the WB1P-Myc mouse model.** **(A)** Longitudinal *in vivo* bioluminescence imaging of luciferase expression in a WB1P-Myc female, showing signal build-up over time. **(B)** Response of WB1P and WB1P-Myc tumors to cisplatin and PARP inhibitors, as visualized by tumor volume curves. Small fragments of WB1P and WB1P-Myc tumors were transplanted in the fourth mammary fat pad of nude mice ( $n=36$  per donor). When tumors had reached a size of  $100\text{ mm}^3$ , mice were treated with  $6\text{ mg kg}^{-1}$  cisplatin (administered i.v. on day 0 and day 14),  $100\text{ mg kg}^{-1}$  AZD2461 (administered daily by per os, for 28 consecutive days) or vehicle. Error bars represent standard error of the mean. **(C)** Kaplan-Meier curves showing mammary tumor-specific survival for the different genotypes. *WapCre;Brca1<sup>F/F</sup>;Trp53<sup>F/F</sup>;Col1a1<sup>invCAG-Myc-IRES-Luc/+</sup>* (WB1P-Myc) females ( $n=35$ ) showed a reduced mammary tumor-specific survival compared to *WapCre;Brca1<sup>F/+</sup>;Trp53<sup>F/F</sup>;Col1a1<sup>invCAG-Myc-IRES-Luc/+</sup>* ( $n=20$ ) littermates (97 days vs 105 days;  $***P < 0.001$  by Mantel-Cox test). **(D)** Unsupervised clustering (Euclidean distance, average linkage) of WB1P and WB1P-Myc tumors with tumors derived from published mouse models of luminal (*WapCre;Cdh1<sup>F/F</sup>;Pten<sup>F/F</sup>*, WEP) and basal-like (*K14Cre;Brca1<sup>F/F</sup>;Trp53<sup>F/F</sup>*, KB1P) breast cancer, using a three-genes signature that distinguishes the PAM50 subtypes (26). **(E)** *Myc* expression levels in WB1P and WB1P-Myc tumors;  $****P < 0.0001$  (two-sided Mann-Whitney U test). Boxes extend from the third (Q3) to the first (Q1) quartile (interquartile range, IQR), with the line at the median; whiskers extend to  $Q3 + 1.5 \times \text{IQR}$  and to  $Q1 - 1.5 \times \text{IQR}$ . Points beyond the ends of the whiskers are outliers. **(F)** Immunohistochemical detection of MYC in multiple independent WB1P and WB1P-Myc tumors. Bar,  $400\text{ }\mu\text{M}$ .

# Supplementary Figure 3

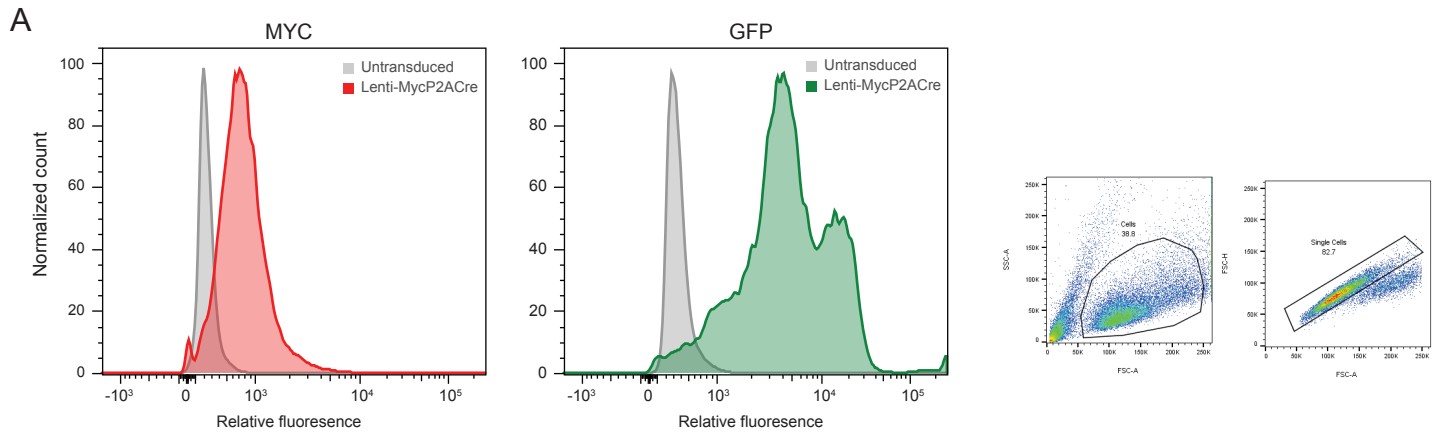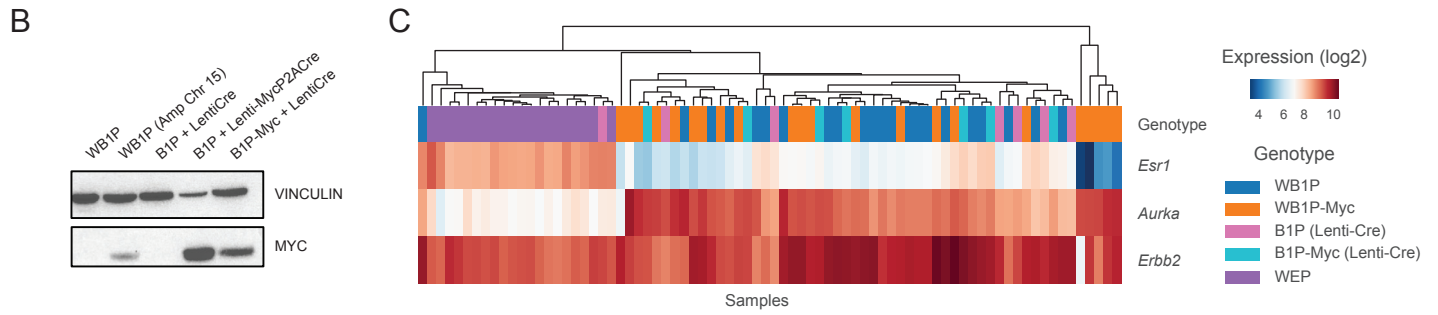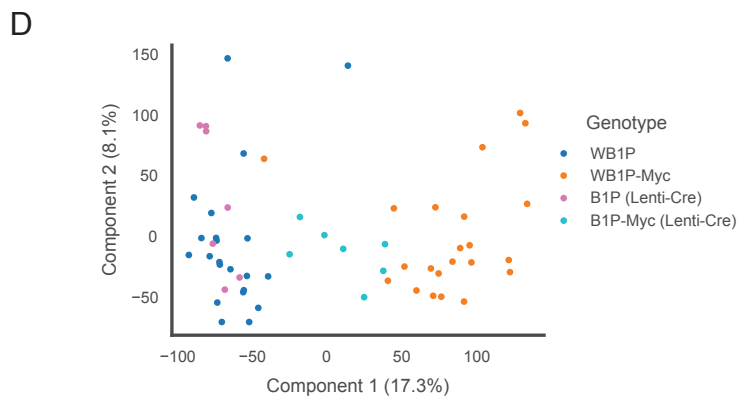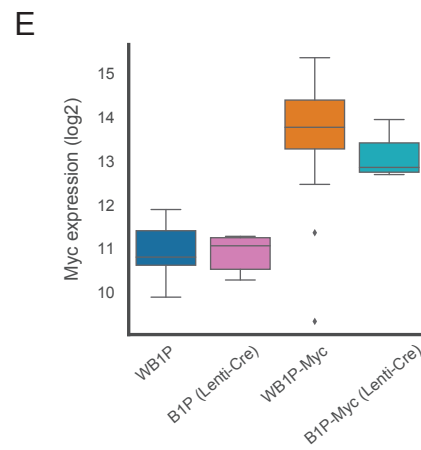

**Supplementary Figure 3. Non-germline models with *Myc* overexpression.** **(A)** *In vitro* validation of Lenti-MycP2ACre in Cre-reporter cells (containing a lox-STOP-lox-GFP cassette) 5 days after transduction. Expression of MYC as visualized by FACS using an anti-MYC antibody and FACS analysis of Cre-recombined GFP-positive cells are shown. A figure exemplifying the gating strategy is provided on the right. **(B)** Expression of MYC in independent tumors as visualized by immunoblotting using anti-MYC antibody. Sample order: WB1P tumor without chromosome 15 amplification; WB1P tumor with chromosome 15 amplification; tumor from B1P mouse injected with Lenti-Cre; tumor from B1P mouse injected with Lenti-MycP2ACre; tumor from B1P-Myc mouse injected with Lenti-Cre. **(C)** Unsupervised clustering (Euclidean distance, average linkage) of the tumors from germline and somatic models using the three-genes PAM50 signature (26), showing that tumors from the somatic models retain the basal expression profiles observed in tumors from the germline models. **(D)** PCA plot comparing WB1P and WB1P-Myc tumors to tumors from the non-germline models (Lenti-Cre injected B1P and B1P-Myc mice) using global gene expression profiles. **(E)** *Myc* expression levels in tumors from germline and non-germline models. Boxes extend from the third (Q3) to the first (Q1) quartile (interquartile range, IQR), with the line at the median; whiskers extend to  $Q3 + 1.5 \times IQR$  and to  $Q1 - 1.5 \times IQR$ . Points beyond the ends of the whiskers are outliers.

# Supplementary Figure 4

A

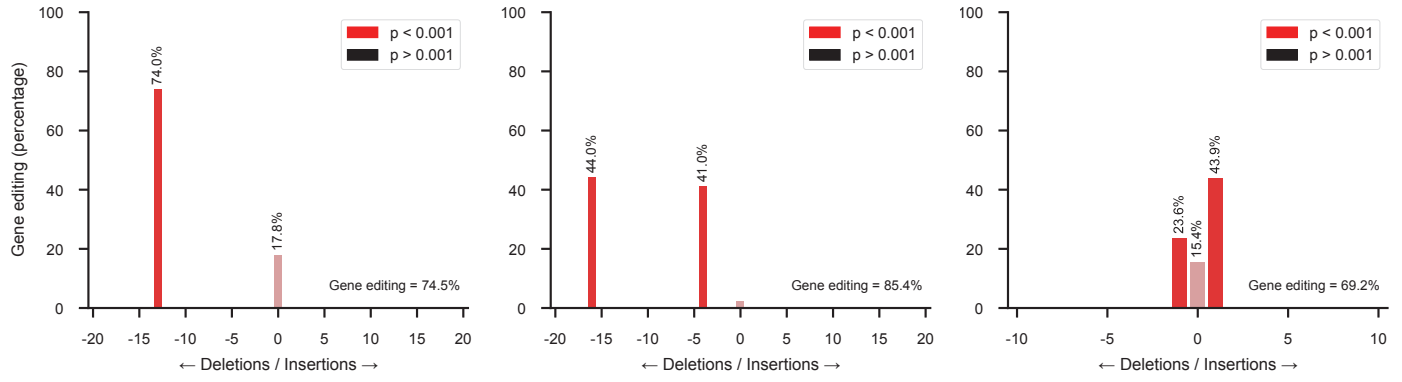

B

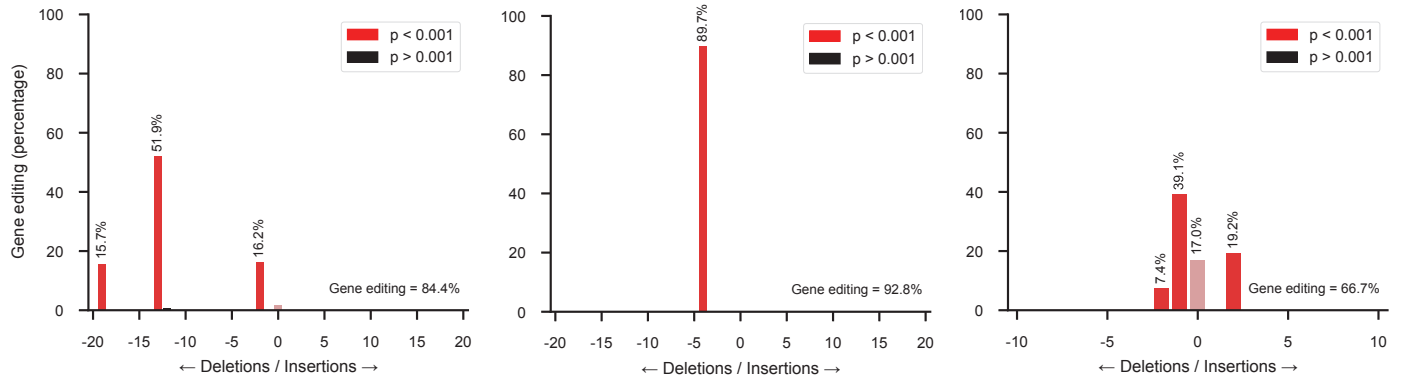

**Supplementary Figure 4. CRISPR-mediated somatic gene disruption of *Rb1* and *Pten*. (A-B)** TIDE analysis showing the spectrum of insertions/deletions (indels) of the targeted *Rb1* (A) and *Pten* (B) alleles in multiple independent tumors from WB1P-Cas9 mice injected with Lenti-sg*Rb1*-Myc and Lenti-sg*Pten*-Myc, respectively.

# Supplementary Figure 5

A

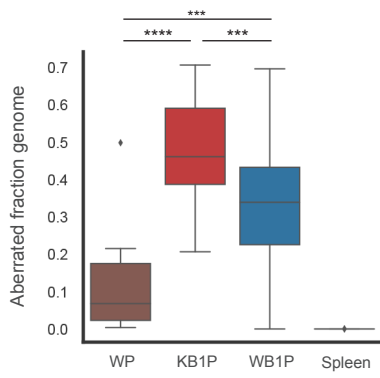

B

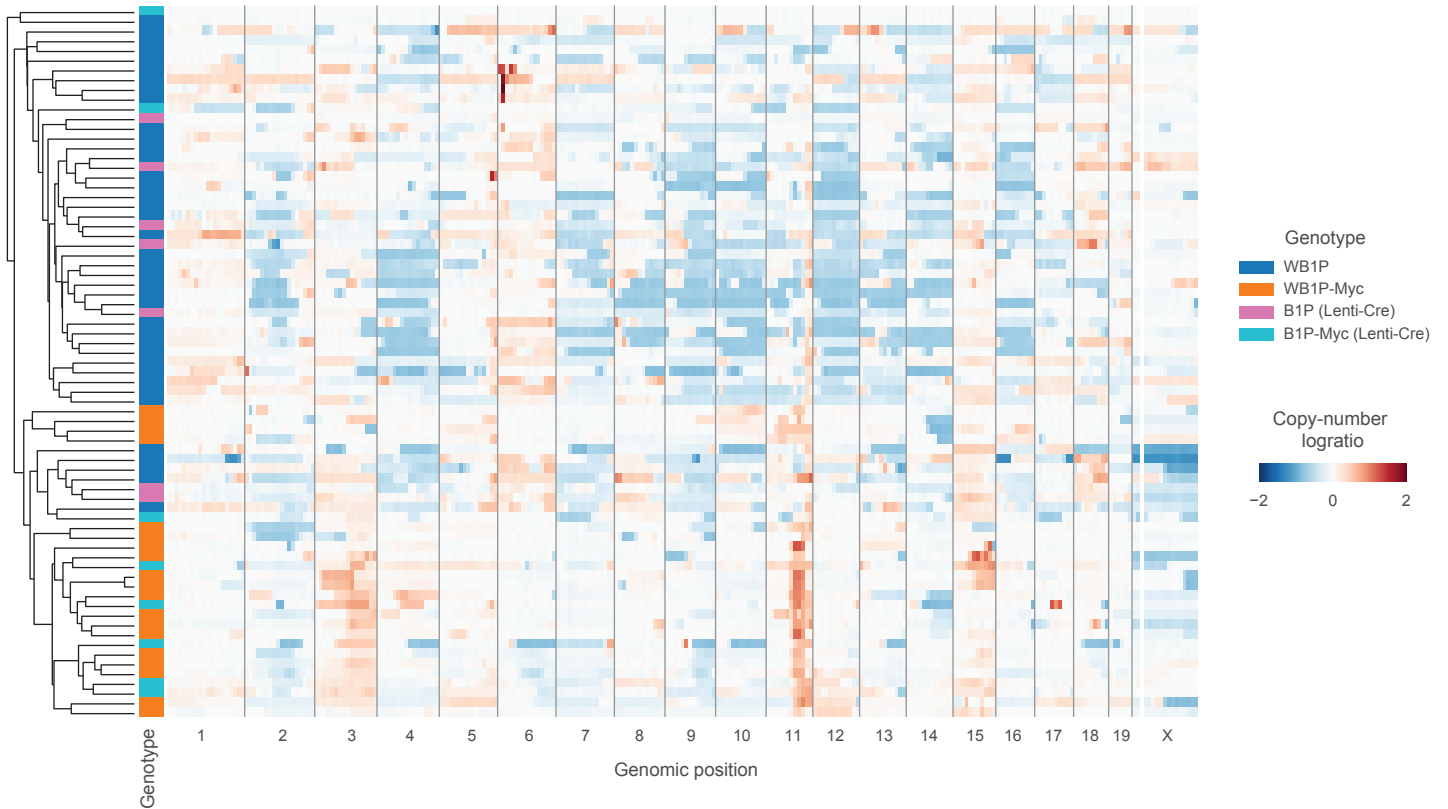

C

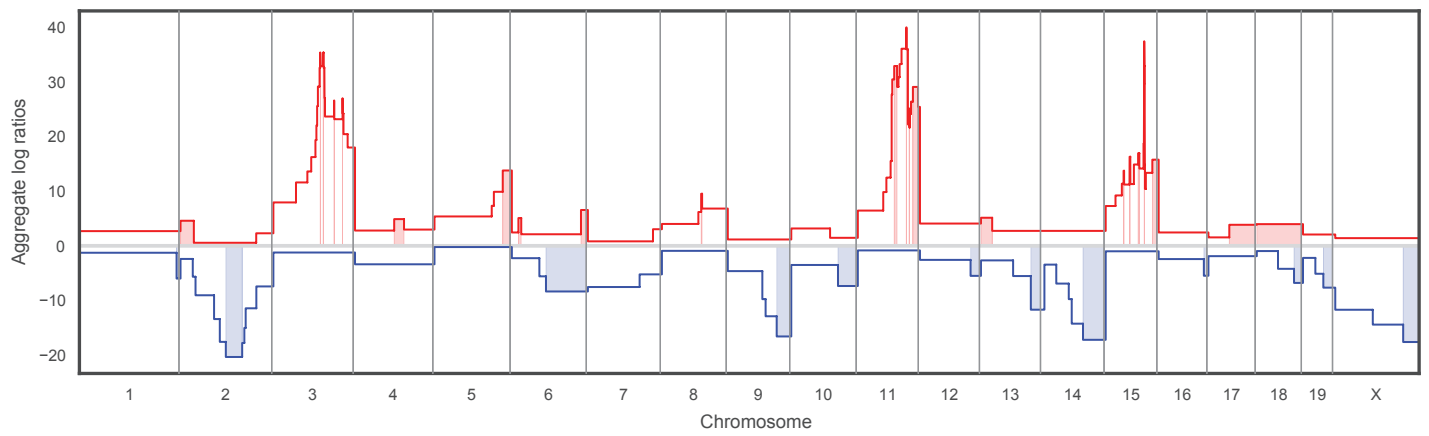

**Supplementary Figure 5. Genomic instability of WB1P and WB1P-Myc tumors. (A)** Genomic instability scores of WP, WB1P and KB1P tumors; \*\*\* $P < 0.001$  and \*\*\*\* $P < 0.0001$  (two-sided Mann-Whitney U test). Scores for spleen samples from WB1P mice are shown as reference. Boxes extend from the third (Q3) to the first (Q1) quartile (interquartile range, IQR), with the line at the median; whiskers extend to  $Q3 + 1.5 \times IQR$  and to  $Q1 - 1.5 \times IQR$ . Points beyond the ends of the whiskers are outliers. **(B)** Unsupervised clustering (correlation distance, average linkage) of the tumors from somatic and germline models based on their copy-number profiles. Tumors from the somatic models mainly cluster together with their germline counterparts, demonstrating that these tumors have similar patterns of copy-number aberrations. **(C)** Overview of the recurrently aberrated regions identified by RUBIC in the combined set of MYC-driven tumors from the germline and somatic models.

# Supplementary Figure 6

**A**

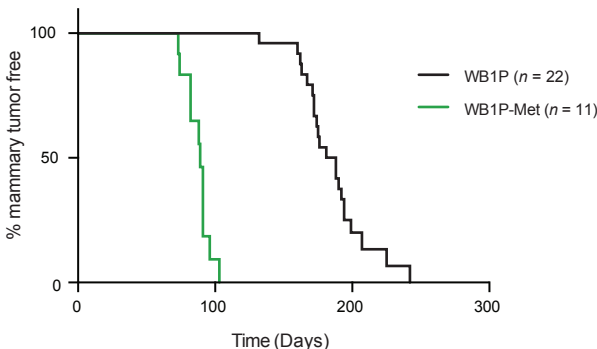

**B**

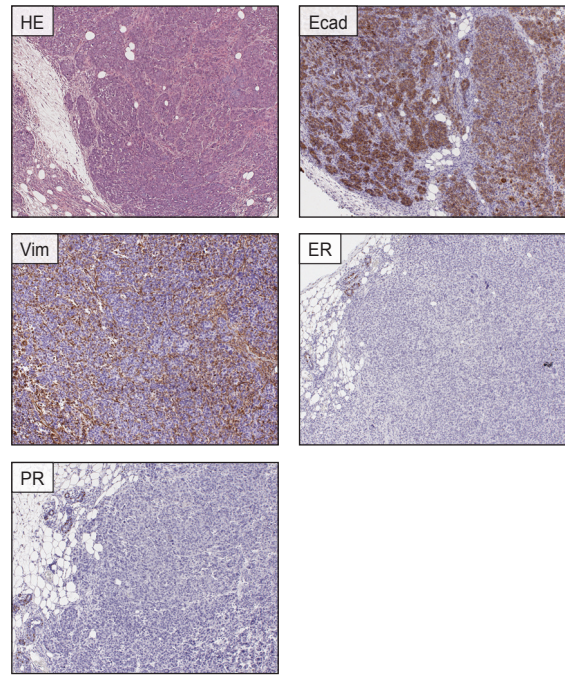

**C**

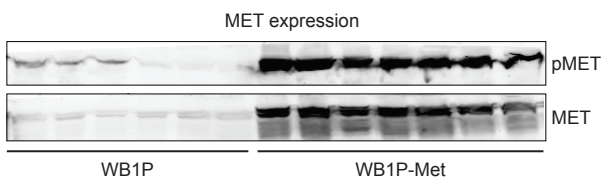

**D**

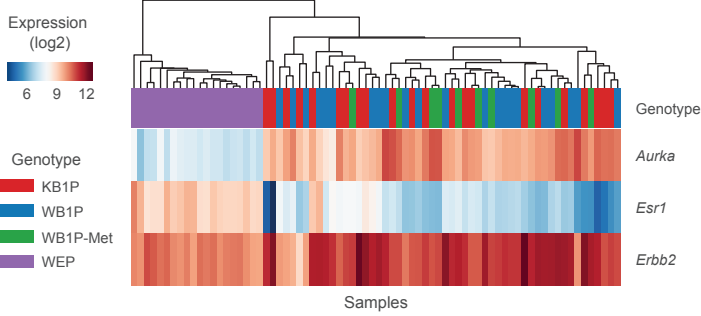

**E**

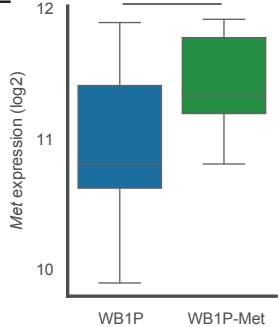

**F**

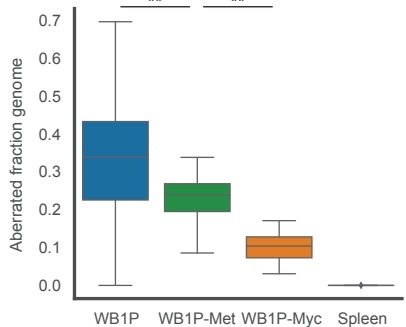

**G**

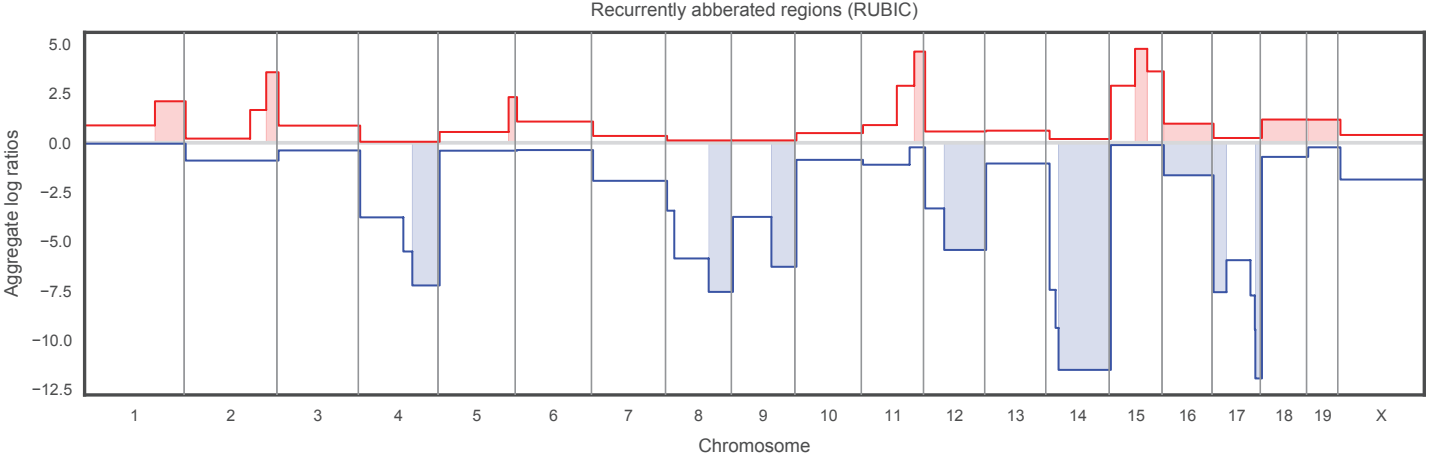



**Supplementary Figure 6. Characterization of the WB1P-Met mouse model.** **(A)** Kaplan-Meier curves showing mammary tumor-specific survival for the different genotypes. *WapCre;Brca1<sup>F/F</sup>;Trp53<sup>F/F</sup>;Col1a1<sup>invCAG-Met-IRES-Luc/+</sup>* (WB1P-Met) females showed a reduced mammary tumor-specific survival compared to WB1P littermates (89 days vs 188 days; \*\*\*\* $P < 0.0001$  by Mantel-Cox test). **(B)** Representative hematoxylin and eosin (HE) staining and immunohistochemical detection of E-cadherin, vimentin, ER and PR in WB1P-Met tumors. **(C)** Expression and activity of MET in independent tumors from WB1P and WB1P-Met mice, as visualized by immunoblotting using anti-MET and anti-phosphoMET antibodies. **(D)** Unsupervised clustering (Euclidean distance, average linkage) of WB1P and WB1P-Met tumors with tumors derived from published mouse models of luminal (*WapCre;Cdh1<sup>F/F</sup>;Pten<sup>F/F</sup>*, WEP) and basal-like (*K14Cre;Brca1<sup>F/F</sup>;Trp53<sup>F/F</sup>*, KB1P) breast cancer, using a three-genes signature that distinguishes the PAM50 subtypes (26). **(E)** *Met* expression levels in WB1P and WB1P-Met tumors; \*\* $P < 0.01$  (two-sided Mann-Whitney U test). Boxes extend from the third (Q3) to the first (Q1) quartile (interquartile range, IQR), with the line at the median; whiskers extend to  $Q3 + 1.5 \times IQR$  and to  $Q1 - 1.5 \times IQR$ . **(F)** Genomic instability of WB1P, WB1P-Met and WB1P-Myc tumors; \*\* $P < 0.01$  and \*\*\*\* $P < 0.0001$  (two-sided Mann-Whitney U test). Scores for spleen samples from WB1P mice are shown as reference. **(G)** Genome-wide RUBIC analysis of the CNV profiles of WB1P-Met tumors. Significant amplifications and deletions are marked by light red and blue columns, respectively.

# Supplementary Figure 7

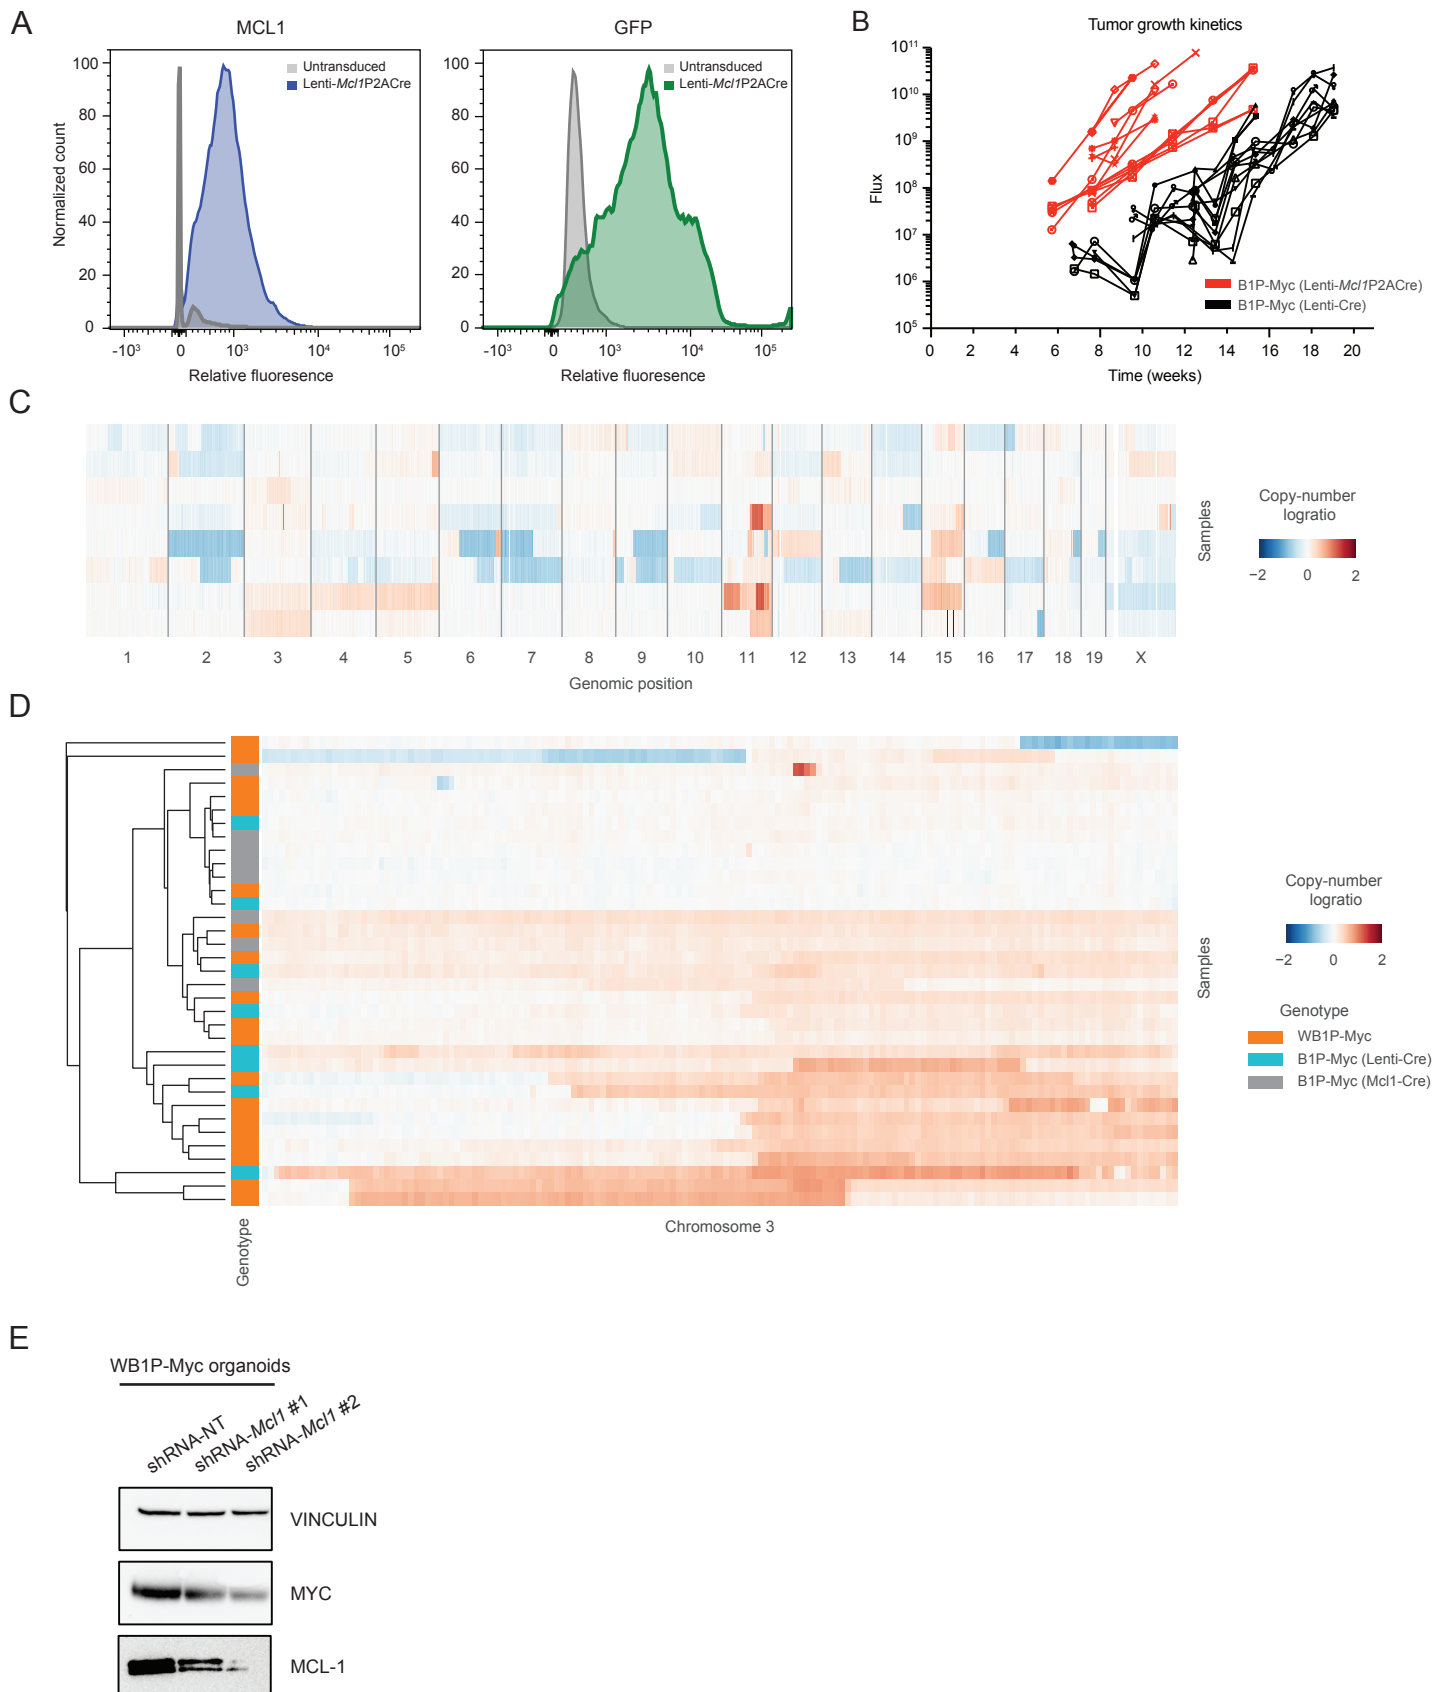

**Supplementary Figure 7. Validation of MCL1 as a driver in BRCA1-associated TNBC. (A)** *In vitro* validation of Lenti-Mcl1P2ACre in Cre-reporter cells 5 days after transduction. Expression of MCL1 as visualized by FACS using an anti-MCL1 antibody and FACS analysis of Cre-recombined GFP-positive cells are shown. **(B)** Longitudinal *in vivo* bioluminescence imaging of luciferase expression in B1P-Myc animals injected with Lenti-Cre (black lines) or Lenti-Mcl1P2ACre (red lines), showing signal build-up over time. **(C)** Heatmap showing the copy-number logratios for tumors from B1P-Myc females injected with Lenti-Mcl1P2ACre, showing that recurrent gains on chromosomes 11 and 15 are retained, whilst the gain on chromosome 3 is less pronounced. **(D)** Unsupervised clustering (Euclidean distance, average linkage) of MYC-driven tumors from germline and somatic models (WB1P-Myc tumors and tumors from Lenti-Cre injected B1P-Myc mice) together with tumors from B1P-Myc females injected with Lenti-Mcl1P2ACre. The clustering shows that the focal gain surrounding *Mcl1* is lost in the majority of tumors from Lenti-Mcl1P2ACre injected B1P-Myc females. **(E)** Expression of MYC and MCL1 in WB1P-Myc organoids transduced with a non-targeting shRNA or with two independent sh*Mcl1* vectors, as visualized by immunoblotting using anti-MYC antibody 5 days after transduction.

# Supplementary Figure 8

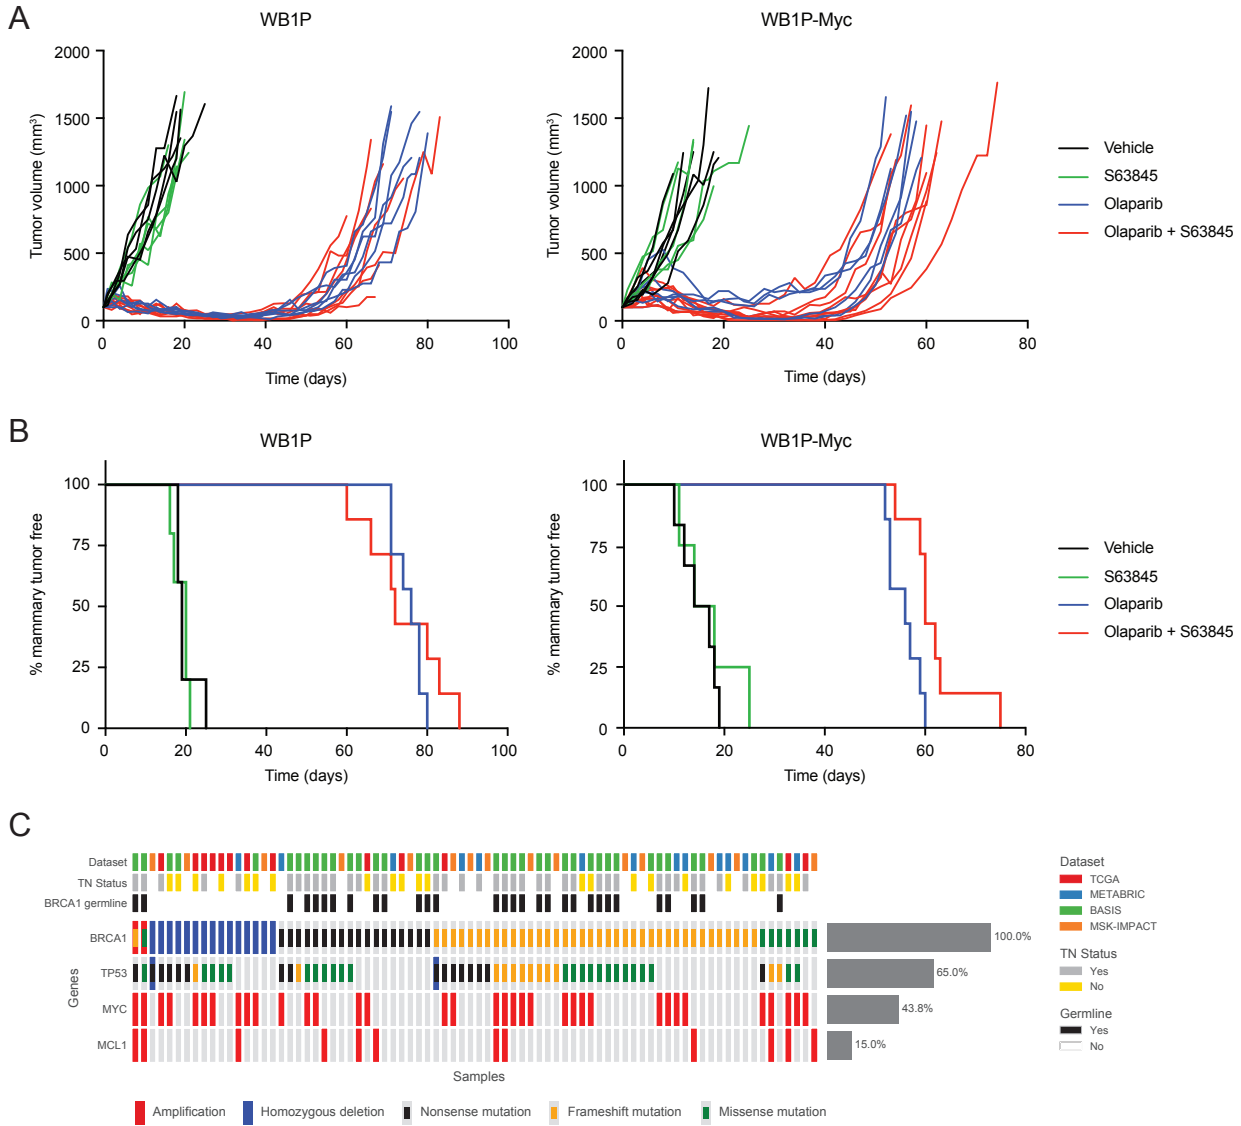

**Supplementary Figure 8. Treatment of WB1P and WB1P-Myc tumors with MCL1 and PARP inhibitors. (A-B)** Response of organoid-derived WB1P and WB1P-Myc tumors to MCL1 and PARP inhibitors, as visualized by tumor volume curves **(A)** and Kaplan Meier curves **(B)**. WB1P and WB1P-Myc organoid lines were transplanted in the fourth mammary fat pad of nude mice ( $n=24$  per donor). When tumors had reached a size of  $100 \text{ mm}^3$ , mice were treated with  $25 \text{ mg kg}^{-1}$  S63845 (administered i.v. once weekly for 5 weeks),  $100 \text{ mg kg}^{-1}$  olaparib (administered i.p. daily for 28 consecutive days), both drugs or vehicle. S63845 shows minimal additive efficacy over olaparib alone in WB1P-Myc tumors ( $*P < 0.05$  by Mantel-Cox test). **(C)** Overview of the mutations and copy-number events in our panel of 80 *BRCA1*-mutated human breast tumor samples for *TP53*, *MYC* and *MCL1*.

**Supplementary Table 1. Mutational landscape of human *BRCA1*-mutated TNBC.** Deleterious mutations and copy-number events in 80 *BRCA1*-mutated human breast tumor samples from four large-scale tumor-sequencing studies.

| sample            | gene  | type     | value      | dataset    | mutation      |
|-------------------|-------|----------|------------|------------|---------------|
| TCGA-E9-A1NC      | BRCA1 | mutation | nonsense   | TCGA       | p.Q139*       |
| TCGA-LL-A5YP      | BRCA1 | mutation | missense   | TCGA       | p.D96H        |
| TCGA-AN-A0XU      | BRCA1 | mutation | missense   | TCGA       | p.G1788V      |
| TCGA-A2-A25B      | BRCA1 | mutation | nonsense   | TCGA       | p.E720*       |
| TCGA-D8-A27M      | BRCA1 | mutation | frameshift | TCGA       | p.P1614Qfs*19 |
| MB-0346           | BRCA1 | mutation | missense   | METABRIC   | p.R1737T      |
| MB-0420           | BRCA1 | mutation | frameshift | METABRIC   | p.V1654Cfs*4  |
| MB-5070           | BRCA1 | mutation | frameshift | METABRIC   | p.T150Pfs*13  |
| MB-5107           | BRCA1 | mutation | frameshift | METABRIC   | p.E1494Kfs*11 |
| MB-5323           | BRCA1 | mutation | frameshift | METABRIC   | p.E880Rfs*13  |
| MB-5465           | BRCA1 | mutation | frameshift | METABRIC   | p.D560Efs*6   |
| MB-6060           | BRCA1 | mutation | nonsense   | METABRIC   | p.S282*       |
| MB-6098           | BRCA1 | mutation | missense   | METABRIC   | p.D1692N      |
| MB-6271           | BRCA1 | mutation | frameshift | METABRIC   | p.L502Sfs*2   |
| MB-7032           | BRCA1 | mutation | frameshift | METABRIC   | p.K1667Qfs*11 |
| MB-7038           | BRCA1 | mutation | frameshift | METABRIC   | p.Q202Kfs*32  |
| MB-7048           | BRCA1 | mutation | frameshift | METABRIC   | p.F709Sfs*29  |
| MTS-T0064         | BRCA1 | mutation | nonsense   | METABRIC   | p.Y1463*      |
| P-0010035-T01-IM5 | BRCA1 | mutation | frameshift | MSK-IMPACT | p.G911Efs*89  |
| P-0002915-T01-IM3 | BRCA1 | mutation | frameshift | MSK-IMPACT | p.E729Rfs*10  |
| P-0005423-T01-IM5 | BRCA1 | mutation | frameshift | MSK-IMPACT | p.E23Afs*18   |
| P-0011369-T01-IM5 | BRCA1 | mutation | frameshift | MSK-IMPACT | p.E686*       |
| P-0007037-T01-IM5 | BRCA1 | mutation | frameshift | MSK-IMPACT | p.G1371Vfs*4  |
| P-0008994-T01-IM5 | BRCA1 | mutation | frameshift | MSK-IMPACT | p.R71Kfs*10   |
| P-0006504-T02-IM5 | BRCA1 | mutation | frameshift | MSK-IMPACT | p.L358Kfs*13  |
| P-0010457-T01-IM5 | BRCA1 | mutation | nonsense   | MSK-IMPACT | p.K1724*      |
| P-0003885-T01-IM5 | BRCA1 | mutation | nonsense   | MSK-IMPACT | p.E648*       |
| P-0002237-T01-IM3 | BRCA1 | mutation | frameshift | MSK-IMPACT | p.E1219Ffs*12 |
| P-0002858-T01-IM3 | BRCA1 | mutation | missense   | MSK-IMPACT | p.Q1395E      |
| P-0010758-T01-IM5 | BRCA1 | mutation | frameshift | MSK-IMPACT | p.V1654Cfs*4  |
| PD11742           | BRCA1 | mutation | frameshift | BASIS      | p.F1772fs*29  |
| PD7215            | BRCA1 | mutation | missense   | BASIS      | p.D1739V      |
| PD9585            | BRCA1 | mutation | nonsense   | BASIS      | p.R1443*      |
| PD7067            | BRCA1 | mutation | nonsense   | BASIS      | p.E515*       |
| PD23561           | BRCA1 | mutation | frameshift | BASIS      | p.A224fs*4    |
| PD24202           | BRCA1 | mutation | frameshift | BASIS      | p.V1833fs*7   |
| PD8621            | BRCA1 | mutation | nonsense   | BASIS      | p.R1835*      |
| PD13296           | BRCA1 | mutation | frameshift | BASIS      | p.?           |
| PD24337           | BRCA1 | mutation | nonsense   | BASIS      | p.E1754*      |
| PD9702            | BRCA1 | mutation | missense   | BASIS      | p.R1699W      |
| PD6406            | BRCA1 | mutation | missense   | BASIS      | p.D1692N      |
| PD9004            | BRCA1 | mutation | frameshift | BASIS      | p.P1464fs*2   |
| PD3905            | BRCA1 | mutation | frameshift | BASIS      | p.?           |
| PD24186           | BRCA1 | mutation | frameshift | BASIS      | p.Q1447fs*16  |
| PD4005            | BRCA1 | mutation | frameshift | BASIS      | p.I1237fs*27  |
| PD13771           | BRCA1 | mutation | nonsense   | BASIS      | p.K1183fs*26  |

|                   |       |          |            |            |              |
|-------------------|-------|----------|------------|------------|--------------|
| PD13297           | BRCA1 | mutation | nonsense   | BASIS      | p.E1060*     |
| PD5935            | BRCA1 | mutation | nonsense   | BASIS      | p.E1060*     |
| PD11327           | BRCA1 | mutation | frameshift | BASIS      | p.N1029fs*5  |
| PD10014           | BRCA1 | mutation | frameshift | BASIS      | p.K894fs*8   |
| PD3890            | BRCA1 | mutation | frameshift | BASIS      | p.G834fs*12  |
| PD5930            | BRCA1 | mutation | frameshift | BASIS      | p.D825fs*21  |
| PD8980            | BRCA1 | mutation | frameshift | BASIS      | p.D825fs*21  |
| PD14442           | BRCA1 | mutation | nonsense   | BASIS      | p.Q563*      |
| PD4006            | BRCA1 | mutation | nonsense   | BASIS      | p.Q563*      |
| PD13299           | BRCA1 | mutation | frameshift | BASIS      | p.K519fs*13  |
| PD4107            | BRCA1 | mutation | frameshift | BASIS      | p.V340fs*6   |
| PD23562           | BRCA1 | mutation | frameshift | BASIS      | p.S308fs*1   |
| PD5945            | BRCA1 | mutation | frameshift | BASIS      | p.V233fs*4   |
| PD22355           | BRCA1 | mutation | nonsense   | BASIS      | p.Y130*      |
| PD23574           | BRCA1 | mutation | nonsense   | BASIS      | p.Y130*      |
| PD23578           | BRCA1 | mutation | nonsense   | BASIS      | p.Y130*      |
| PD6413            | BRCA1 | mutation | frameshift | BASIS      | p.G129fs*34  |
| PD6731            | BRCA1 | mutation | frameshift | BASIS      | p.E23fs*17   |
| PD5948            | BRCA1 | mutation | frameshift | BASIS      | p.?          |
| TCGA-BH-A0AW      | TP53  | mutation | missense   | TCGA       | p.F270S      |
| TCGA-AO-A0JL      | TP53  | mutation | nonsense   | TCGA       | p.R306*      |
| TCGA-BH-A0C0      | TP53  | mutation | frameshift | TCGA       | p.R110Vfs*13 |
| TCGA-BH-A0C0      | TP53  | mutation | frameshift | TCGA       | p.R110Vfs*13 |
| TCGA-LL-A5YP      | TP53  | mutation | missense   | TCGA       | p.R280K      |
| TCGA-C8-A12L      | TP53  | mutation | missense   | TCGA       | p.C238F      |
| TCGA-BH-A1FU      | TP53  | mutation | missense   | TCGA       | p.R175H      |
| TCGA-D8-A27M      | TP53  | mutation | nonsense   | TCGA       | p.R196*      |
| TCGA-E2-A1L7      | TP53  | mutation | missense   | TCGA       | p.I255F      |
| MB-0346           | TP53  | mutation | missense   | METABRIC   | p.R273C      |
| MB-0420           | TP53  | mutation | nonsense   | METABRIC   | p.R306*      |
| MB-5465           | TP53  | mutation | nonsense   | METABRIC   | p.R213*      |
| MB-6098           | TP53  | mutation | frameshift | METABRIC   | p.S215Cfs*6  |
| MB-6271           | TP53  | mutation | missense   | METABRIC   | p.C135F      |
| MB-7048           | TP53  | mutation | missense   | METABRIC   | p.R110L      |
| MTS-T0064         | TP53  | mutation | missense   | METABRIC   | p.E285D      |
| MTS-T0064         | TP53  | mutation | nonsense   | METABRIC   | p.E286*      |
| P-0010035-T01-IM5 | TP53  | mutation | frameshift | MSK-IMPACT | p.R110Pfs*14 |
| P-0011369-T01-IM5 | TP53  | mutation | nonsense   | MSK-IMPACT | p.R196*      |
| P-0007037-T01-IM5 | TP53  | mutation | missense   | MSK-IMPACT | p.E224D      |
| P-0008994-T01-IM5 | TP53  | mutation | missense   | MSK-IMPACT | p.Y107D      |
| P-0006504-T02-IM5 | TP53  | mutation | nonsense   | MSK-IMPACT | p.R213*      |
| P-0009557-T01-IM5 | TP53  | mutation | nonsense   | MSK-IMPACT | p.S183*      |
| P-0010457-T01-IM5 | TP53  | mutation | missense   | MSK-IMPACT | p.T125R      |
| P-0002237-T01-IM3 | TP53  | mutation | nonsense   | MSK-IMPACT | p.Q100*      |
| P-0002591-T01-IM3 | TP53  | mutation | nonsense   | MSK-IMPACT | p.Q375*      |
| P-0010758-T01-IM5 | TP53  | mutation | frameshift | MSK-IMPACT | p.P85Vfs*35  |
| PD3905            | TP53  | mutation | frameshift | BASIS      | p.E343fs*3   |



|                   |        |          |            |            |               |
|-------------------|--------|----------|------------|------------|---------------|
| PD5948            | TP53   | mutation | frameshift | BASIS      | p.G334fs*12   |
| PD4967            | TP53   | mutation | nonsense   | BASIS      | p.Q331*       |
| PD24337           | TP53   | mutation | missense   | BASIS      | p.R280K       |
| PD8621            | TP53   | mutation | missense   | BASIS      | p.R273G       |
| PD22355           | TP53   | mutation | missense   | BASIS      | p.V272M       |
| PD10014           | TP53   | mutation | missense   | BASIS      | p.I255T       |
| PD6413            | TP53   | mutation | missense   | BASIS      | p.R248Q       |
| PD3890            | TP53   | mutation | missense   | BASIS      | p.R248W       |
| PD11742           | TP53   | mutation | missense   | BASIS      | p.G245S       |
| PD8980            | TP53   | mutation | missense   | BASIS      | p.Y220C       |
| PD4005            | TP53   | mutation | nonsense   | BASIS      | p.R213*       |
| PD9585            | TP53   | mutation | frameshift | BASIS      | p.N200fs*9    |
| PD4107            | TP53   | mutation | frameshift | BASIS      | p.R196fs*51   |
| PD13297           | TP53   | mutation | nonsense   | BASIS      | p.R196*       |
| PD11327           | TP53   | mutation | missense   | BASIS      | p.L194R       |
| PD4826            | TP53   | mutation | nonsense   | BASIS      | p.Q192*       |
| PD24202           | TP53   | mutation | frameshift | BASIS      | p.D184fs*62   |
| PD6731            | TP53   | mutation | missense   | BASIS      | p.R175H       |
| PD23574           | TP53   | mutation | missense   | BASIS      | p.R175H       |
| PD9702            | TP53   | mutation | missense   | BASIS      | p.R175G       |
| PD6406            | TP53   | mutation | frameshift | BASIS      | p.A159fs*8    |
| PD5945            | TP53   | mutation | nonsense   | BASIS      | p.W146*       |
| PD5935            | TP53   | mutation | missense   | BASIS      | p.T125R       |
| PD9004            | TP53   | mutation | frameshift | BASIS      | p.V122fs*26   |
| PD23562           | TP53   | mutation | frameshift | BASIS      | p.E68fs*81    |
| PD7215            | TP53   | mutation | nonsense   | BASIS      | p.W53*        |
| TCGA-C8-A12L      | PIK3CA | mutation | missense   | TCGA       | p.H1047R      |
| MB-5107           | PIK3CA | mutation | missense   | METABRIC   | p.K111E       |
| MB-5107           | PIK3CA | mutation | missense   | METABRIC   | p.G320A       |
| MB-6060           | PIK3CA | mutation | missense   | METABRIC   | p.H1047R      |
| MB-7032           | PIK3CA | mutation | missense   | METABRIC   | p.H1047R      |
| P-0002915-T01-IM3 | PIK3CA | mutation | missense   | MSK-IMPACT | p.E970K       |
| P-0005423-T01-IM5 | PIK3CA | mutation | missense   | MSK-IMPACT | p.E542K       |
| P-0008994-T01-IM5 | PIK3CA | mutation | missense   | MSK-IMPACT | p.H1047R      |
| P-0003885-T01-IM5 | PIK3CA | mutation | missense   | MSK-IMPACT | p.E545K       |
| P-0002591-T01-IM3 | PIK3CA | mutation | missense   | MSK-IMPACT | p.H1047R      |
| P-0002858-T01-IM3 | PIK3CA | mutation | missense   | MSK-IMPACT | p.H1047R      |
| P-0010758-T01-IM5 | PIK3CA | mutation | missense   | MSK-IMPACT | p.G122D       |
| PD4967            | PIK3CA | mutation | missense   | BASIS      | p.P104L       |
| PD13299           | PIK3CA | mutation | missense   | BASIS      | p.E542K       |
| PD23561           | PIK3CA | mutation | missense   | BASIS      | p.E542K       |
| PD3905            | PIK3CA | mutation | missense   | BASIS      | p.E542K       |
| PD11327           | PIK3CA | mutation | missense   | BASIS      | p.E545K       |
| PD4967            | PIK3CA | mutation | missense   | BASIS      | p.H1047R      |
| TCGA-EW-A10X      | GATA3  | mutation | frameshift | TCGA       | p.*444Yfs*63  |
| TCGA-A2-A25B      | GATA3  | mutation | frameshift | TCGA       | p.M400Vfs*106 |
| P-0002915-T01-IM3 | GATA3  | mutation | frameshift | MSK-IMPACT | p.N333Kfs*19  |

|                   |        |          |            |            |                |
|-------------------|--------|----------|------------|------------|----------------|
| P-0005423-T01-IM5 | GATA3  | mutation | frameshift | MSK-IMPACT | p.P408Qfs*97   |
| P-0002023-T01-IM3 | GATA3  | mutation | frameshift | MSK-IMPACT | p.S401Vfs*106  |
| MB-0346           | KMT2D  | mutation | missense   | METABRIC   | p.G4427A       |
| MB-5070           | KMT2D  | mutation | missense   | METABRIC   | p.P2108L       |
| MB-6098           | KMT2D  | mutation | missense   | METABRIC   | p.M1166V       |
| MB-6271           | KMT2D  | mutation | missense   | METABRIC   | p.P710R        |
| MTS-T0064         | KMT2D  | mutation | missense   | METABRIC   | p.R466C        |
| MB-6271           | NOTCH1 | mutation | frameshift | METABRIC   | p.H2428Qfs*77  |
| MB-6271           | NOTCH1 | mutation | frameshift | METABRIC   | p.H2428Pfs*79  |
| P-0008994-T01-IM5 | NOTCH1 | mutation | frameshift | MSK-IMPACT | p.S2486Rfs*103 |
| P-0008994-T01-IM5 | NOTCH1 | mutation | missense   | MSK-IMPACT | p.V2385M       |
| P-0010457-T01-IM5 | NOTCH1 | mutation | missense   | MSK-IMPACT | p.T123M        |
| TCGA-EW-A10X      | ARID1A | mutation | frameshift | TCGA       | p.E2250Rfs*28  |
| MB-2827           | ARID1A | mutation | missense   | METABRIC   | p.R1879Q       |
| MB-7038           | ARID1A | mutation | missense   | METABRIC   | p.A1927P       |
| P-0002237-T01-IM3 | ARID1A | mutation | missense   | MSK-IMPACT | p.D1193A       |
| MB-6060           | ATR    | mutation | missense   | METABRIC   | p.I219V        |
| MB-7038           | ATR    | mutation | missense   | METABRIC   | p.H1672R       |
| P-0005423-T01-IM5 | ATR    | mutation | missense   | MSK-IMPACT | p.L2599I       |
| P-0002858-T01-IM3 | ATR    | mutation | missense   | MSK-IMPACT | p.E1888K       |
| P-0008994-T01-IM5 | CDH1   | mutation | frameshift | MSK-IMPACT | p.P825Rfs*21   |
| P-0003885-T01-IM5 | CDH1   | mutation | missense   | MSK-IMPACT | p.E273K        |
| P-0002591-T01-IM3 | CDH1   | mutation | frameshift | MSK-IMPACT | p.R74Dfs*9     |
| PD14442           | CDH1   | mutation | nonsense   | BASIS      | p.Q699*        |
| P-0002915-T01-IM3 | CREBBP | mutation | missense   | MSK-IMPACT | p.S893W        |
| P-0008994-T01-IM5 | CREBBP | mutation | missense   | MSK-IMPACT | p.R1960Q       |
| P-0003885-T01-IM5 | CREBBP | mutation | missense   | MSK-IMPACT | p.E1501K       |
| P-0003885-T01-IM5 | CREBBP | mutation | missense   | MSK-IMPACT | p.H1351D       |
| P-0007037-T01-IM5 | GATA2  | mutation | frameshift | MSK-IMPACT | p.D367Efs*17   |
| P-0006504-T02-IM5 | GATA2  | mutation | missense   | MSK-IMPACT | p.S122T        |
| P-0003885-T01-IM5 | GATA2  | mutation | nonsense   | MSK-IMPACT | p.Q239*        |
| P-0003885-T01-IM5 | GATA2  | mutation | missense   | MSK-IMPACT | p.S192F        |
| TCGA-BH-A0AW      | SYNE1  | mutation | missense   | TCGA       | p.N4215Y       |
| MB-5465           | SYNE1  | mutation | missense   | METABRIC   | p.L125F        |
| MB-6060           | SYNE1  | mutation | missense   | METABRIC   | p.R1091W       |
| MB-6098           | SYNE1  | mutation | nonsense   | METABRIC   | p.W1139*       |
| TCGA-BH-A0C0      | ABCA9  | mutation | missense   | TCGA       | p.N1371S       |
| TCGA-BH-A0C0      | ABCA9  | mutation | missense   | TCGA       | p.N1371S       |
| TCGA-A2-A25B      | ABCA9  | mutation | missense   | TCGA       | p.K1521E       |
| MB-0346           | AKAP9  | mutation | missense   | METABRIC   | p.E1342Q       |
| MB-7038           | AKAP9  | mutation | missense   | METABRIC   | p.E2403G       |
| MB-7048           | AKAP9  | mutation | missense   | METABRIC   | p.R3233H       |
| MB-2827           | FLT3   | mutation | missense   | METABRIC   | p.S976R        |
| P-0002858-T01-IM3 | FLT3   | mutation | missense   | MSK-IMPACT | p.E672K        |
| P-0002858-T01-IM3 | FLT3   | mutation | missense   | MSK-IMPACT | p.S638L        |
| PD4967            | MLLT4  | mutation | frameshift | BASIS      | p.F275fs*7     |
| PD4005            | MLLT4  | mutation | nonsense   | BASIS      | p.Q421*        |

|                   |           |          |            |            |              |
|-------------------|-----------|----------|------------|------------|--------------|
| PD13771           | MLLT4     | mutation | nonsense   | BASIS      | p.R776*      |
| P-0002858-T01-IM3 | NOTCH2    | mutation | missense   | MSK-IMPACT | p.D2438N     |
| P-0002858-T01-IM3 | NOTCH2    | mutation | missense   | MSK-IMPACT | p.E2344Q     |
| P-0002858-T01-IM3 | NOTCH2    | mutation | missense   | MSK-IMPACT | p.E2276K     |
| TCGA-LL-A5YP      | PTEN      | mutation | missense   | TCGA       | p.A126G      |
| P-0009557-T01-IM5 | PTEN      | mutation | frameshift | MSK-IMPACT | p.T319*      |
| PD10014           | PTEN      | mutation | missense   | BASIS      | p.R130Q      |
| TCGA-BH-A0C0      | TAF1L     | mutation | missense   | TCGA       | p.L782Q      |
| TCGA-BH-A0C0      | TAF1L     | mutation | missense   | TCGA       | p.L782Q      |
| TCGA-C8-A12L      | TAF1L     | mutation | frameshift | TCGA       | p.P255Tfs*33 |
| MB-5465           | AHNAK2    | mutation | missense   | METABRIC   | p.A1672V     |
| MB-7048           | AHNAK2    | mutation | missense   | METABRIC   | p.S923C      |
| TCGA-AO-A0JL      | ARID1B    | mutation | missense   | TCGA       | p.V2083L     |
| MB-7038           | ARID1B    | mutation | missense   | METABRIC   | p.G1882E     |
| MB-6060           | BRCA2     | mutation | missense   | METABRIC   | p.A3205V     |
| MB-6060           | BRCA2     | mutation | missense   | METABRIC   | p.A3205P     |
| TCGA-BH-A0C0      | CREB3L2   | mutation | missense   | TCGA       | p.I125M      |
| TCGA-BH-A0C0      | CREB3L2   | mutation | missense   | TCGA       | p.I125M      |
| P-0007037-T01-IM5 | DOT1L     | mutation | missense   | MSK-IMPACT | p.M206I      |
| P-0007037-T01-IM5 | DOT1L     | mutation | missense   | MSK-IMPACT | p.Q530E      |
| MB-7038           | ERBB3     | mutation | missense   | METABRIC   | p.G113R      |
| MB-7038           | ERBB3     | mutation | missense   | METABRIC   | p.A1131T     |
| P-0003885-T01-IM5 | ERCC4     | mutation | missense   | MSK-IMPACT | p.D650H      |
| P-0003885-T01-IM5 | ERCC4     | mutation | frameshift | MSK-IMPACT | p.E631Kfs*4  |
| P-0002915-T01-IM3 | GNAS      | mutation | nonsense   | MSK-IMPACT | p.R601*      |
| P-0002915-T01-IM3 | GNAS      | mutation | missense   | MSK-IMPACT | p.R601L      |
| TCGA-LL-A5YP      | GRIN2A    | mutation | missense   | TCGA       | p.I775T      |
| P-0002858-T01-IM3 | GRIN2A    | mutation | missense   | MSK-IMPACT | p.E691D      |
| TCGA-A2-A25B      | HIST1H2BJ | mutation | missense   | TCGA       | p.M60L       |
| P-0007037-T01-IM5 | HIST1H2BJ | mutation | frameshift | MSK-IMPACT | p.D26Efs*16  |
| P-0009557-T01-IM5 | IKBKE     | mutation | missense   | MSK-IMPACT | p.E177Q      |
| P-0003885-T01-IM5 | IKBKE     | mutation | missense   | MSK-IMPACT | p.E168D      |
| P-0002858-T01-IM3 | IRS2      | mutation | missense   | MSK-IMPACT | p.R83Q       |
| P-0010758-T01-IM5 | IRS2      | mutation | missense   | MSK-IMPACT | p.P9R        |
| TCGA-BH-A0AW      | JAK2      | mutation | missense   | TCGA       | p.R115I      |
| TCGA-LL-A5YP      | JAK2      | mutation | missense   | TCGA       | p.V615L      |
| P-0007037-T01-IM5 | KDM5A     | mutation | missense   | MSK-IMPACT | p.S686F      |
| P-0002858-T01-IM3 | KDM5A     | mutation | missense   | MSK-IMPACT | p.S1066F     |
| MB-5323           | MAP3K1    | mutation | missense   | METABRIC   | p.A1194V     |
| P-0002915-T01-IM3 | MAP3K1    | mutation | frameshift | MSK-IMPACT | p.C571Mfs*4  |
| P-0002915-T01-IM3 | MDC1      | mutation | missense   | MSK-IMPACT | p.S1318A     |
| P-0008994-T01-IM5 | MDC1      | mutation | frameshift | MSK-IMPACT | p.K183Nfs*9  |
| MB-7038           | NCOR1     | mutation | missense   | METABRIC   | p.N877S      |
| P-0003885-T01-IM5 | NCOR1     | mutation | nonsense   | MSK-IMPACT | p.R1275*     |
| P-0002023-T01-IM3 | NSD1      | mutation | missense   | MSK-IMPACT | p.Q2669R     |
| P-0002858-T01-IM3 | NSD1      | mutation | frameshift | MSK-IMPACT | p.E249Kfs*12 |
| MB-6060           | PDE4DIP   | mutation | missense   | METABRIC   | p.R2117Q     |

|                   |          |          |            |            |               |
|-------------------|----------|----------|------------|------------|---------------|
| MB-7038           | PDE4DIP  | mutation | missense   | METABRIC   | p.R419L       |
| P-0002915-T01-IM3 | PIK3C2G  | mutation | missense   | MSK-IMPACT | p.M1350I      |
| P-0003885-T01-IM5 | PIK3C2G  | mutation | nonsense   | MSK-IMPACT | p.S297*       |
| TCGA-E9-A1NC      | PIK3CB   | mutation | frameshift | TCGA       | p.R604Pfs*29  |
| P-0002858-T01-IM3 | PIK3CB   | mutation | missense   | MSK-IMPACT | p.R321Q       |
| P-0011369-T01-IM5 | PRDM1    | mutation | missense   | MSK-IMPACT | p.W199C       |
| PD13296           | PRDM1    | mutation | nonsense   | BASIS      | p.C789*       |
| MB-5323           | PTPRD    | mutation | missense   | METABRIC   | p.Y751F       |
| MB-6271           | PTPRD    | mutation | missense   | METABRIC   | p.N837I       |
| TCGA-BH-A0C0      | RANBP17  | mutation | missense   | TCGA       | p.D516N       |
| TCGA-BH-A0C0      | RANBP17  | mutation | missense   | TCGA       | p.D516N       |
| TCGA-BH-A0C0      | RET      | mutation | missense   | TCGA       | p.P117T       |
| TCGA-BH-A0C0      | RET      | mutation | missense   | TCGA       | p.P117T       |
| MB-5070           | SETD2    | mutation | missense   | METABRIC   | p.D995E       |
| P-0008994-T01-IM5 | SETD2    | mutation | missense   | MSK-IMPACT | p.R1543W      |
| TCGA-AN-A0XU      | SPEN     | mutation | frameshift | TCGA       | p.D73Pfs*6    |
| PD9004            | SPEN     | mutation | frameshift | BASIS      | p.L2402fs*13  |
| P-0006504-T02-IM5 | TET2     | mutation | nonsense   | MSK-IMPACT | p.R1452*      |
| P-0002858-T01-IM3 | TET2     | mutation | missense   | MSK-IMPACT | p.Q1445K      |
| P-0011369-T01-IM5 | ABL1     | mutation | missense   | MSK-IMPACT | p.E675A       |
| MB-6271           | AFF2     | mutation | missense   | METABRIC   | p.L1034I      |
| P-0002858-T01-IM3 | AKT1     | mutation | missense   | MSK-IMPACT | p.S381L       |
| TCGA-E9-A1NC      | ALDH2    | mutation | frameshift | TCGA       | p.K289Efs*45  |
| P-0002237-T01-IM3 | ALK      | mutation | missense   | MSK-IMPACT | p.N1497K      |
| TCGA-BH-A0C0      | ARHGAP35 | mutation | missense   | TCGA       | p.P1402T      |
| P-0008994-T01-IM5 | ATM      | mutation | nonsense   | MSK-IMPACT | p.R2598*      |
| P-0002858-T01-IM3 | AXIN1    | mutation | missense   | MSK-IMPACT | p.P61A        |
| MB-0346           | BAP1     | mutation | frameshift | METABRIC   | p.S623Rfs*14  |
| TCGA-E9-A1NC      | BCL3     | mutation | frameshift | TCGA       | p.S448Lfs*19  |
| P-0002858-T01-IM3 | BCOR     | mutation | missense   | MSK-IMPACT | p.R1398T      |
| TCGA-LL-A5YP      | BCORL1   | mutation | missense   | TCGA       | p.A1661S      |
| MB-0346           | CASP8    | mutation | missense   | METABRIC   | p.I144M       |
| TCGA-LL-A5YP      | CD36     | mutation | missense   | TCGA       | p.S324T       |
| TCGA-AO-A0JL      | CDH11    | mutation | missense   | TCGA       | p.L569F       |
| P-0002858-T01-IM3 | CDK12    | mutation | nonsense   | MSK-IMPACT | p.S24*        |
| TCGA-EW-A10X      | CHEK1    | mutation | frameshift | TCGA       | p.W231*       |
| P-0008994-T01-IM5 | CHEK2    | mutation | missense   | MSK-IMPACT | p.R3Q         |
| TCGA-AO-A0JL      | CIITA    | mutation | missense   | TCGA       | p.D154H       |
| P-0010758-T01-IM5 | CTCF     | mutation | missense   | MSK-IMPACT | p.E584Q       |
| TCGA-BH-A0AW      | CTLA4    | mutation | missense   | TCGA       | p.L196V       |
| TCGA-BH-A0AW      | DDR2     | mutation | missense   | TCGA       | p.S123I       |
| P-0007037-T01-IM5 | DNMT3A   | mutation | missense   | MSK-IMPACT | p.L639V       |
| P-0007037-T01-IM5 | EGFR     | mutation | missense   | MSK-IMPACT | p.N413K       |
| TCGA-A2-A25B      | FAT3     | mutation | frameshift | TCGA       | p.L4090Sfs*25 |
| P-0002858-T01-IM3 | FGF19    | mutation | missense   | MSK-IMPACT | p.D198H       |
| P-0002591-T01-IM3 | FGFR1    | mutation | missense   | MSK-IMPACT | p.G48D        |
| P-0003885-T01-IM5 | FGFR2    | mutation | missense   | MSK-IMPACT | p.P253R       |

|                   |        |          |            |            |             |
|-------------------|--------|----------|------------|------------|-------------|
| P-0003885-T01-IM5 | FLCN   | mutation | missense   | MSK-IMPACT | p.Q31E      |
| P-0010457-T01-IM5 | FLT1   | mutation | missense   | MSK-IMPACT | p.R280L     |
| P-0003885-T01-IM5 | FOXP1  | mutation | nonsense   | MSK-IMPACT | p.E294*     |
| P-0006504-T02-IM5 | FYN    | mutation | missense   | MSK-IMPACT | p.R481Q     |
| TCGA-E9-A1NC      | GATA1  | mutation | missense   | TCGA       | p.R307H     |
| TCGA-AO-A0JL      | HGF    | mutation | missense   | TCGA       | p.R468C     |
| TCGA-AO-A0JL      | ICOSLG | mutation | frameshift | TCGA       | p.H147Pfs*7 |
| P-0008994-T01-IM5 | IDH1   | mutation | missense   | MSK-IMPACT | p.T327A     |
| TCGA-C8-A12L      | IL7R   | mutation | missense   | TCGA       | p.M164V     |
| P-0010758-T01-IM5 | INHBA  | mutation | missense   | MSK-IMPACT | p.W218C     |
| TCGA-AN-A0XU      | ITGAL  | mutation | missense   | TCGA       | p.L969M     |
| P-0008994-T01-IM5 | JAK1   | mutation | frameshift | MSK-IMPACT | p.P430Rfs*2 |
| P-0008994-T01-IM5 | JUN    | mutation | missense   | MSK-IMPACT | p.P207Q     |
| P-0007037-T01-IM5 | KDM5C  | mutation | missense   | MSK-IMPACT | p.L747P     |
| P-0002858-T01-IM3 | KIT    | mutation | missense   | MSK-IMPACT | p.E88K      |
| P-0010758-T01-IM5 | LATS1  | mutation | missense   | MSK-IMPACT | p.T367S     |
| P-0010457-T01-IM5 | LATS2  | mutation | missense   | MSK-IMPACT | p.K855R     |
| MB-7038           | LIFR   | mutation | missense   | METABRIC   | p.H105R     |
| TCGA-AN-A0XU      | MAML2  | mutation | missense   | TCGA       | p.P572L     |
| P-0002858-T01-IM3 | MDM2   | mutation | missense   | MSK-IMPACT | p.Q141E     |
| TCGA-C8-A12L      | MYH9   | mutation | missense   | TCGA       | p.E912D     |
| TCGA-AO-A0JL      | NAV3   | mutation | missense   | TCGA       | p.E1734K    |
| MB-6271           | NCOA3  | mutation | missense   | METABRIC   | p.R487H     |
| MB-5070           | NCOR2  | mutation | missense   | METABRIC   | p.E871K     |
| PD24202           | NF1    | mutation | nonsense   | BASIS      | p.Q589*     |
| P-0011369-T01-IM5 | NKX2-1 | mutation | missense   | MSK-IMPACT | p.A124G     |
| P-0002858-T01-IM3 | NTRK1  | mutation | missense   | MSK-IMPACT | p.F395L     |
| TCGA-E9-A1NC      | NUP93  | mutation | missense   | TCGA       | p.E14K      |
| TCGA-C8-A12L      | OBSCN  | mutation | missense   | TCGA       | p.T544S     |
| TCGA-BH-A0AW      | PAG1   | mutation | missense   | TCGA       | p.V242A     |
| P-0003885-T01-IM5 | PAK7   | mutation | missense   | MSK-IMPACT | p.S114N     |
| P-0007037-T01-IM5 | PALB2  | mutation | missense   | MSK-IMPACT | p.R942T     |
| P-0002858-T01-IM3 | PARP1  | mutation | missense   | MSK-IMPACT | p.D957N     |
| PD8980            | PBRM1  | mutation | frameshift | BASIS      | p.P227fs*2  |
| P-0003885-T01-IM5 | PDCD1  | mutation | missense   | MSK-IMPACT | p.Q245H     |
| TCGA-C8-A12L      | PDCD11 | mutation | missense   | TCGA       | p.H417Q     |
| P-0007037-T01-IM5 | PDGFRA | mutation | missense   | MSK-IMPACT | p.D366H     |
| PD5930            | PHF6   | mutation | nonsense   | BASIS      | p.G348*     |
| TCGA-AN-A0XU      | PIK3C3 | mutation | missense   | TCGA       | p.P98S      |
| P-0005423-T01-IM5 | PMS1   | mutation | missense   | MSK-IMPACT | p.H81Y      |
| P-0002858-T01-IM3 | POLE   | mutation | missense   | MSK-IMPACT | p.E1299Q    |
| PD6406            | PREX2  | mutation | missense   | BASIS      | p.R155Q     |
| P-0007037-T01-IM5 | PTCH1  | mutation | missense   | MSK-IMPACT | p.L209R     |
| TCGA-C8-A12L      | PTPN11 | mutation | missense   | TCGA       | p.G13D      |
| TCGA-C8-A12L      | PTPN2  | mutation | missense   | TCGA       | p.I164S     |
| P-0003885-T01-IM5 | PTPRT  | mutation | missense   | MSK-IMPACT | p.R450Q     |
| P-0003885-T01-IM5 | RAD51  | mutation | missense   | MSK-IMPACT | p.E50Q      |

|                   |           |          |            |            |              |
|-------------------|-----------|----------|------------|------------|--------------|
| P-0008994-T01-IM5 | RAD52     | mutation | missense   | MSK-IMPACT | p.N99D       |
| P-0002858-T01-IM3 | RAD54L    | mutation | missense   | MSK-IMPACT | p.Q689E      |
| P-0002237-T01-IM3 | RBM10     | mutation | missense   | MSK-IMPACT | p.D20N       |
| TCGA-AN-A0XU      | RBMX      | mutation | frameshift | TCGA       | p.P106Ffs*32 |
| P-0005423-T01-IM5 | RICTOR    | mutation | missense   | MSK-IMPACT | p.I228F      |
| P-0002858-T01-IM3 | RIT1      | mutation | missense   | MSK-IMPACT | p.M90I       |
| TCGA-E2-A1L7      | SGK1      | mutation | missense   | TCGA       | p.K137N      |
| P-0003885-T01-IM5 | SMAD2     | mutation | nonsense   | MSK-IMPACT | p.Q168*      |
| TCGA-A2-A25B      | SMAD4     | mutation | missense   | TCGA       | p.L109R      |
| TCGA-A2-A25B      | SMARCA1   | mutation | missense   | TCGA       | p.S321Y      |
| P-0002858-T01-IM3 | SMARCA4   | mutation | missense   | MSK-IMPACT | p.E566Q      |
| TCGA-AN-A0XU      | STAG1     | mutation | missense   | TCGA       | p.N941I      |
| P-0009557-T01-IM5 | STAG2     | mutation | missense   | MSK-IMPACT | p.I900M      |
| TCGA-E9-A1NC      | STAT6     | mutation | frameshift | TCGA       | p.Q281Pfs*92 |
| TCGA-BH-A18R      | TBL1XR1   | mutation | frameshift | TCGA       | p.A142*      |
| P-0002858-T01-IM3 | TET1      | mutation | missense   | MSK-IMPACT | p.D658H      |
| P-0002858-T01-IM3 | TGFBR2    | mutation | missense   | MSK-IMPACT | p.F442Y      |
| TCGA-BH-A1FU      | THRAP3    | mutation | missense   | TCGA       | p.R48S       |
| P-0010457-T01-IM5 | TOP1      | mutation | missense   | MSK-IMPACT | p.E213G      |
| TCGA-AO-A0JL      | TRIP11    | mutation | missense   | TCGA       | p.M716T      |
| TCGA-LL-A5YP      | TRRAP     | mutation | missense   | TCGA       | p.F154S      |
| P-0002915-T01-IM3 | TSC2      | mutation | missense   | MSK-IMPACT | p.K1180E     |
| TCGA-E9-A1NC      | TYK2      | mutation | frameshift | TCGA       | p.T1106Hfs*5 |
| TCGA-BH-A0AW      | UHRF1BP1L | mutation | missense   | TCGA       | p.S752L      |
| MB-6060           | USP9X     | mutation | nonsense   | METABRIC   | p.L1321*     |
| P-0002237-T01-IM3 | WT1       | mutation | missense   | MSK-IMPACT | p.P135A      |
| TCGA-C8-A12L      | XPO1      | mutation | missense   | TCGA       | p.F444L      |
| P-0002858-T01-IM3 | YES1      | mutation | missense   | MSK-IMPACT | p.E349K      |
| P-0006504-T02-IM5 | ZFH3      | mutation | missense   | MSK-IMPACT | p.F204C      |
| TCGA-A2-A25B      | SDHD      | cna      | hetloss    | TCGA       |              |
| TCGA-AN-A0XU      | SDHD      | cna      | gain       | TCGA       |              |
| TCGA-AO-A0JL      | SDHD      | cna      | hetloss    | TCGA       |              |
| TCGA-BH-A0C0      | SDHD      | cna      | gain       | TCGA       |              |
| TCGA-BH-A18R      | SDHD      | cna      | homdel     | TCGA       |              |
| TCGA-D8-A27M      | SDHD      | cna      | hetloss    | TCGA       |              |
| TCGA-E2-A1L7      | SDHD      | cna      | hetloss    | TCGA       |              |
| TCGA-E9-A1NC      | SDHD      | cna      | hetloss    | TCGA       |              |
| TCGA-EW-A10X      | SDHD      | cna      | homdel     | TCGA       |              |
| TCGA-LL-A5YP      | SDHD      | cna      | hetloss    | TCGA       |              |
| MB-0346           | SDHD      | cna      | hetloss    | METABRIC   |              |
| MB-5070           | SDHD      | cna      | hetloss    | METABRIC   |              |
| MB-5107           | SDHD      | cna      | hetloss    | METABRIC   |              |
| MB-6271           | SDHD      | cna      | hetloss    | METABRIC   |              |
| MB-7032           | SDHD      | cna      | hetloss    | METABRIC   |              |
| MB-7048           | SDHD      | cna      | hetloss    | METABRIC   |              |
| PD11327           | SDHD      | cna      | gain       | BASIS      |              |
| PD11742           | SDHD      | cna      | hetloss    | BASIS      |              |

|         |       |     |         |          |
|---------|-------|-----|---------|----------|
| PD13296 | SDHD  | cna | hetloss | BASIS    |
| PD13299 | SDHD  | cna | gain    | BASIS    |
| PD13771 | SDHD  | cna | hetloss | BASIS    |
| PD22355 | SDHD  | cna | hetloss | BASIS    |
| PD23574 | SDHD  | cna | gain    | BASIS    |
| PD23578 | SDHD  | cna | hetloss | BASIS    |
| PD24186 | SDHD  | cna | gain    | BASIS    |
| PD24206 | SDHD  | cna | gain    | BASIS    |
| PD24337 | SDHD  | cna | hetloss | BASIS    |
| PD3905  | SDHD  | cna | gain    | BASIS    |
| PD4005  | SDHD  | cna | hetloss | BASIS    |
| PD4826  | SDHD  | cna | hetloss | BASIS    |
| PD5935  | SDHD  | cna | gain    | BASIS    |
| PD5945  | SDHD  | cna | gain    | BASIS    |
| PD5948  | SDHD  | cna | gain    | BASIS    |
| PD6413  | SDHD  | cna | hetloss | BASIS    |
| PD6731  | SDHD  | cna | hetloss | BASIS    |
| PD7067  | SDHD  | cna | gain    | BASIS    |
| PD7215  | SDHD  | cna | gain    | BASIS    |
| PD9004  | SDHD  | cna | hetloss | BASIS    |
| PD9585  | SDHD  | cna | gain    | BASIS    |
| PD9702  | SDHD  | cna | gain    | BASIS    |
| PD11327 | SDHD  | cna | gain    | BASIS    |
| PD11742 | SDHD  | cna | hetloss | BASIS    |
| PD13296 | SDHD  | cna | hetloss | BASIS    |
| PD13299 | SDHD  | cna | gain    | BASIS    |
| PD13771 | SDHD  | cna | hetloss | BASIS    |
| PD22355 | SDHD  | cna | hetloss | BASIS    |
| PD23574 | SDHD  | cna | gain    | BASIS    |
| PD23578 | SDHD  | cna | hetloss | BASIS    |
| PD24186 | SDHD  | cna | gain    | BASIS    |
| PD24206 | SDHD  | cna | gain    | BASIS    |
| PD24337 | SDHD  | cna | hetloss | BASIS    |
| PD3905  | SDHD  | cna | gain    | BASIS    |
| PD4005  | SDHD  | cna | hetloss | BASIS    |
| PD4826  | SDHD  | cna | hetloss | BASIS    |
| PD5935  | SDHD  | cna | gain    | BASIS    |
| PD5945  | SDHD  | cna | gain    | BASIS    |
| PD5948  | SDHD  | cna | gain    | BASIS    |
| PD6413  | SDHD  | cna | hetloss | BASIS    |
| PD6731  | SDHD  | cna | hetloss | BASIS    |
| PD7067  | SDHD  | cna | gain    | BASIS    |
| PD7215  | SDHD  | cna | gain    | BASIS    |
| PD9004  | SDHD  | cna | hetloss | BASIS    |
| PD9585  | SDHD  | cna | gain    | BASIS    |
| PD9702  | SDHD  | cna | gain    | BASIS    |
| MB-2827 | CKS1B | cna | amp     | METABRIC |

|         |       |     |         |          |
|---------|-------|-----|---------|----------|
| MB-5070 | CKS1B | cna | gain    | METABRIC |
| MB-6060 | CKS1B | cna | gain    | METABRIC |
| MB-6098 | CKS1B | cna | amp     | METABRIC |
| MB-7032 | CKS1B | cna | gain    | METABRIC |
| PD10014 | CKS1B | cna | gain    | BASIS    |
| PD11327 | CKS1B | cna | gain    | BASIS    |
| PD13297 | CKS1B | cna | gain    | BASIS    |
| PD13299 | CKS1B | cna | gain    | BASIS    |
| PD13771 | CKS1B | cna | gain    | BASIS    |
| PD14442 | CKS1B | cna | gain    | BASIS    |
| PD22355 | CKS1B | cna | gain    | BASIS    |
| PD23562 | CKS1B | cna | amp     | BASIS    |
| PD23574 | CKS1B | cna | amp     | BASIS    |
| PD24186 | CKS1B | cna | gain    | BASIS    |
| PD24206 | CKS1B | cna | gain    | BASIS    |
| PD3890  | CKS1B | cna | gain    | BASIS    |
| PD3905  | CKS1B | cna | gain    | BASIS    |
| PD4005  | CKS1B | cna | gain    | BASIS    |
| PD4006  | CKS1B | cna | amp     | BASIS    |
| PD4107  | CKS1B | cna | gain    | BASIS    |
| PD4826  | CKS1B | cna | gain    | BASIS    |
| PD5930  | CKS1B | cna | amp     | BASIS    |
| PD5935  | CKS1B | cna | gain    | BASIS    |
| PD5945  | CKS1B | cna | amp     | BASIS    |
| PD5948  | CKS1B | cna | gain    | BASIS    |
| PD6406  | CKS1B | cna | gain    | BASIS    |
| PD6413  | CKS1B | cna | gain    | BASIS    |
| PD7067  | CKS1B | cna | amp     | BASIS    |
| PD7215  | CKS1B | cna | gain    | BASIS    |
| PD8621  | CKS1B | cna | amp     | BASIS    |
| PD8980  | CKS1B | cna | gain    | BASIS    |
| PD9004  | CKS1B | cna | amp     | BASIS    |
| PD9702  | CKS1B | cna | amp     | BASIS    |
| PD10014 | CKS1B | cna | hetloss | BASIS    |
| PD11742 | CKS1B | cna | hetloss | BASIS    |
| PD13296 | CKS1B | cna | hetloss | BASIS    |
| PD13297 | CKS1B | cna | hetloss | BASIS    |
| PD22355 | CKS1B | cna | hetloss | BASIS    |
| PD23562 | CKS1B | cna | hetloss | BASIS    |
| PD23578 | CKS1B | cna | hetloss | BASIS    |
| PD24186 | CKS1B | cna | gain    | BASIS    |
| PD24202 | CKS1B | cna | hetloss | BASIS    |
| PD24206 | CKS1B | cna | gain    | BASIS    |
| PD24337 | CKS1B | cna | hetloss | BASIS    |
| PD3890  | CKS1B | cna | hetloss | BASIS    |
| PD3905  | CKS1B | cna | gain    | BASIS    |
| PD4005  | CKS1B | cna | hetloss | BASIS    |



|                   |       |     |         |            |
|-------------------|-------|-----|---------|------------|
| PD4006            | CKS1B | cna | homdel  | BASIS      |
| PD4107            | CKS1B | cna | hetloss | BASIS      |
| PD5930            | CKS1B | cna | gain    | BASIS      |
| PD5935            | CKS1B | cna | hetloss | BASIS      |
| PD5948            | CKS1B | cna | hetloss | BASIS      |
| PD6413            | CKS1B | cna | hetloss | BASIS      |
| PD6731            | CKS1B | cna | hetloss | BASIS      |
| PD7215            | CKS1B | cna | hetloss | BASIS      |
| PD8621            | CKS1B | cna | hetloss | BASIS      |
| PD9585            | CKS1B | cna | hetloss | BASIS      |
| TCGA-A2-A25B      | MYC   | cna | gain    | TCGA       |
| TCGA-AN-A0XU      | MYC   | cna | amp     | TCGA       |
| TCGA-AO-A0JL      | MYC   | cna | amp     | TCGA       |
| TCGA-BH-A0AW      | MYC   | cna | gain    | TCGA       |
| TCGA-BH-A0C0      | MYC   | cna | amp     | TCGA       |
| TCGA-BH-A18R      | MYC   | cna | amp     | TCGA       |
| TCGA-BH-A1FU      | MYC   | cna | amp     | TCGA       |
| TCGA-C8-A12L      | MYC   | cna | gain    | TCGA       |
| TCGA-D8-A27M      | MYC   | cna | amp     | TCGA       |
| TCGA-E2-A1L7      | MYC   | cna | amp     | TCGA       |
| TCGA-E9-A1NC      | MYC   | cna | amp     | TCGA       |
| TCGA-LL-A5YP      | MYC   | cna | amp     | TCGA       |
| MB-0346           | MYC   | cna | amp     | METABRIC   |
| MB-2827           | MYC   | cna | amp     | METABRIC   |
| MB-5107           | MYC   | cna | amp     | METABRIC   |
| MB-5465           | MYC   | cna | gain    | METABRIC   |
| MB-6060           | MYC   | cna | gain    | METABRIC   |
| MB-6098           | MYC   | cna | amp     | METABRIC   |
| MB-7038           | MYC   | cna | amp     | METABRIC   |
| MB-7048           | MYC   | cna | amp     | METABRIC   |
| MB-0420           | MYC   | cna | gain    | METABRIC   |
| MTS-T0064         | MYC   | cna | amp     | METABRIC   |
| P-0002237-T01-IM3 | MYC   | cna | amp     | MSK-IMPACT |
| P-0010758-T01-IM5 | MYC   | cna | amp     | MSK-IMPACT |
| PD10014           | MYC   | cna | gain    | BASIS      |
| PD11327           | MYC   | cna | amp     | BASIS      |
| PD11742           | MYC   | cna | gain    | BASIS      |
| PD13296           | MYC   | cna | hetloss | BASIS      |
| PD13297           | MYC   | cna | gain    | BASIS      |
| PD13299           | MYC   | cna | amp     | BASIS      |
| PD13771           | MYC   | cna | gain    | BASIS      |
| PD23562           | MYC   | cna | amp     | BASIS      |
| PD23574           | MYC   | cna | amp     | BASIS      |
| PD23578           | MYC   | cna | gain    | BASIS      |
| PD24186           | MYC   | cna | amp     | BASIS      |
| PD24202           | MYC   | cna | gain    | BASIS      |
| PD24206           | MYC   | cna | amp     | BASIS      |

|                   |       |     |      |            |
|-------------------|-------|-----|------|------------|
| PD24337           | MYC   | cna | gain | BASIS      |
| PD3890            | MYC   | cna | amp  | BASIS      |
| PD3905            | MYC   | cna | amp  | BASIS      |
| PD4005            | MYC   | cna | gain | BASIS      |
| PD4006            | MYC   | cna | gain | BASIS      |
| PD4107            | MYC   | cna | gain | BASIS      |
| PD4826            | MYC   | cna | amp  | BASIS      |
| PD5930            | MYC   | cna | gain | BASIS      |
| PD5935            | MYC   | cna | amp  | BASIS      |
| PD5945            | MYC   | cna | amp  | BASIS      |
| PD5948            | MYC   | cna | amp  | BASIS      |
| PD6406            | MYC   | cna | gain | BASIS      |
| PD6413            | MYC   | cna | gain | BASIS      |
| PD6731            | MYC   | cna | gain | BASIS      |
| PD7067            | MYC   | cna | amp  | BASIS      |
| PD7215            | MYC   | cna | amp  | BASIS      |
| PD8621            | MYC   | cna | gain | BASIS      |
| PD8980            | MYC   | cna | amp  | BASIS      |
| PD9004            | MYC   | cna | amp  | BASIS      |
| PD9585            | MYC   | cna | gain | BASIS      |
| PD9702            | MYC   | cna | amp  | BASIS      |
| TCGA-A2-A25B      | RAD21 | cna | gain | TCGA       |
| TCGA-AN-A0XU      | RAD21 | cna | gain | TCGA       |
| TCGA-AO-A0JL      | RAD21 | cna | amp  | TCGA       |
| TCGA-BH-A0AW      | RAD21 | cna | gain | TCGA       |
| TCGA-BH-A0C0      | RAD21 | cna | amp  | TCGA       |
| TCGA-BH-A18R      | RAD21 | cna | amp  | TCGA       |
| TCGA-BH-A1FU      | RAD21 | cna | amp  | TCGA       |
| TCGA-C8-A12L      | RAD21 | cna | gain | TCGA       |
| TCGA-D8-A27M      | RAD21 | cna | amp  | TCGA       |
| TCGA-E2-A1L7      | RAD21 | cna | gain | TCGA       |
| TCGA-E9-A1NC      | RAD21 | cna | amp  | TCGA       |
| TCGA-LL-A5YP      | RAD21 | cna | amp  | TCGA       |
| MB-0346           | RAD21 | cna | amp  | METABRIC   |
| MB-2827           | RAD21 | cna | amp  | METABRIC   |
| MB-5070           | RAD21 | cna | amp  | METABRIC   |
| MB-5107           | RAD21 | cna | amp  | METABRIC   |
| MB-5465           | RAD21 | cna | gain | METABRIC   |
| MB-6060           | RAD21 | cna | gain | METABRIC   |
| MB-6098           | RAD21 | cna | amp  | METABRIC   |
| MB-7038           | RAD21 | cna | amp  | METABRIC   |
| MB-7048           | RAD21 | cna | gain | METABRIC   |
| MB-0420           | RAD21 | cna | gain | METABRIC   |
| P-0010758-T01-IM5 | RAD21 | cna | amp  | MSK-IMPACT |
| PD10014           | RAD21 | cna | gain | BASIS      |
| PD11327           | RAD21 | cna | amp  | BASIS      |
| PD11742           | RAD21 | cna | gain | BASIS      |

|              |       |     |         |          |
|--------------|-------|-----|---------|----------|
| PD13296      | RAD21 | cna | hetloss | BASIS    |
| PD13299      | RAD21 | cna | amp     | BASIS    |
| PD13771      | RAD21 | cna | gain    | BASIS    |
| PD23562      | RAD21 | cna | amp     | BASIS    |
| PD23574      | RAD21 | cna | amp     | BASIS    |
| PD23578      | RAD21 | cna | gain    | BASIS    |
| PD24186      | RAD21 | cna | amp     | BASIS    |
| PD24202      | RAD21 | cna | gain    | BASIS    |
| PD24206      | RAD21 | cna | amp     | BASIS    |
| PD24337      | RAD21 | cna | gain    | BASIS    |
| PD3890       | RAD21 | cna | gain    | BASIS    |
| PD3905       | RAD21 | cna | gain    | BASIS    |
| PD4005       | RAD21 | cna | gain    | BASIS    |
| PD4006       | RAD21 | cna | gain    | BASIS    |
| PD4107       | RAD21 | cna | gain    | BASIS    |
| PD4826       | RAD21 | cna | amp     | BASIS    |
| PD4967       | RAD21 | cna | gain    | BASIS    |
| PD5930       | RAD21 | cna | gain    | BASIS    |
| PD5935       | RAD21 | cna | gain    | BASIS    |
| PD5945       | RAD21 | cna | amp     | BASIS    |
| PD5948       | RAD21 | cna | amp     | BASIS    |
| PD6406       | RAD21 | cna | gain    | BASIS    |
| PD6413       | RAD21 | cna | gain    | BASIS    |
| PD6731       | RAD21 | cna | gain    | BASIS    |
| PD7067       | RAD21 | cna | amp     | BASIS    |
| PD7215       | RAD21 | cna | amp     | BASIS    |
| PD8621       | RAD21 | cna | gain    | BASIS    |
| PD8980       | RAD21 | cna | gain    | BASIS    |
| PD9004       | RAD21 | cna | amp     | BASIS    |
| PD9585       | RAD21 | cna | gain    | BASIS    |
| PD9702       | RAD21 | cna | amp     | BASIS    |
| TCGA-A2-A25B | NDRG1 | cna | gain    | TCGA     |
| TCGA-AN-A0XU | NDRG1 | cna | hetloss | TCGA     |
| TCGA-AO-A0JL | NDRG1 | cna | amp     | TCGA     |
| TCGA-BH-A0AW | NDRG1 | cna | gain    | TCGA     |
| TCGA-BH-A0C0 | NDRG1 | cna | amp     | TCGA     |
| TCGA-BH-A18R | NDRG1 | cna | amp     | TCGA     |
| TCGA-BH-A1FU | NDRG1 | cna | gain    | TCGA     |
| TCGA-C8-A12L | NDRG1 | cna | gain    | TCGA     |
| TCGA-D8-A27M | NDRG1 | cna | amp     | TCGA     |
| TCGA-E2-A1L7 | NDRG1 | cna | amp     | TCGA     |
| TCGA-E9-A1NC | NDRG1 | cna | amp     | TCGA     |
| TCGA-LL-A5YP | NDRG1 | cna | gain    | TCGA     |
| MB-0346      | NDRG1 | cna | amp     | METABRIC |
| MB-2827      | NDRG1 | cna | amp     | METABRIC |
| MB-5107      | NDRG1 | cna | amp     | METABRIC |
| MB-5465      | NDRG1 | cna | gain    | METABRIC |

|              |       |     |         |          |
|--------------|-------|-----|---------|----------|
| MB-6060      | NDRG1 | cna | gain    | METABRIC |
| MB-6098      | NDRG1 | cna | amp     | METABRIC |
| MB-7038      | NDRG1 | cna | amp     | METABRIC |
| MB-7048      | NDRG1 | cna | amp     | METABRIC |
| MB-0420      | NDRG1 | cna | gain    | METABRIC |
| MTS-T0064    | NDRG1 | cna | gain    | METABRIC |
| PD10014      | NDRG1 | cna | gain    | BASIS    |
| PD11327      | NDRG1 | cna | gain    | BASIS    |
| PD11742      | NDRG1 | cna | gain    | BASIS    |
| PD13296      | NDRG1 | cna | gain    | BASIS    |
| PD13297      | NDRG1 | cna | gain    | BASIS    |
| PD13299      | NDRG1 | cna | gain    | BASIS    |
| PD13771      | NDRG1 | cna | hetloss | BASIS    |
| PD23562      | NDRG1 | cna | amp     | BASIS    |
| PD23574      | NDRG1 | cna | gain    | BASIS    |
| PD23578      | NDRG1 | cna | gain    | BASIS    |
| PD24186      | NDRG1 | cna | amp     | BASIS    |
| PD24202      | NDRG1 | cna | gain    | BASIS    |
| PD24206      | NDRG1 | cna | amp     | BASIS    |
| PD24337      | NDRG1 | cna | gain    | BASIS    |
| PD3890       | NDRG1 | cna | gain    | BASIS    |
| PD3905       | NDRG1 | cna | amp     | BASIS    |
| PD4005       | NDRG1 | cna | gain    | BASIS    |
| PD4006       | NDRG1 | cna | gain    | BASIS    |
| PD4107       | NDRG1 | cna | gain    | BASIS    |
| PD4826       | NDRG1 | cna | amp     | BASIS    |
| PD5930       | NDRG1 | cna | gain    | BASIS    |
| PD5935       | NDRG1 | cna | amp     | BASIS    |
| PD5945       | NDRG1 | cna | amp     | BASIS    |
| PD5948       | NDRG1 | cna | amp     | BASIS    |
| PD6406       | NDRG1 | cna | gain    | BASIS    |
| PD6413       | NDRG1 | cna | gain    | BASIS    |
| PD6731       | NDRG1 | cna | gain    | BASIS    |
| PD7067       | NDRG1 | cna | gain    | BASIS    |
| PD7215       | NDRG1 | cna | amp     | BASIS    |
| PD8621       | NDRG1 | cna | gain    | BASIS    |
| PD8980       | NDRG1 | cna | amp     | BASIS    |
| PD9004       | NDRG1 | cna | amp     | BASIS    |
| PD9585       | NDRG1 | cna | gain    | BASIS    |
| PD9702       | NDRG1 | cna | gain    | BASIS    |
| TCGA-A2-A25B | PTK2  | cna | gain    | TCGA     |
| TCGA-AN-A0XU | PTK2  | cna | hetloss | TCGA     |
| TCGA-AO-A0JL | PTK2  | cna | amp     | TCGA     |
| TCGA-BH-A0AW | PTK2  | cna | gain    | TCGA     |
| TCGA-BH-A0C0 | PTK2  | cna | amp     | TCGA     |
| TCGA-BH-A18R | PTK2  | cna | amp     | TCGA     |
| TCGA-BH-A1FU | PTK2  | cna | gain    | TCGA     |

|              |      |     |         |          |
|--------------|------|-----|---------|----------|
| TCGA-C8-A12L | PTK2 | cna | gain    | TCGA     |
| TCGA-D8-A27M | PTK2 | cna | amp     | TCGA     |
| TCGA-E2-A1L7 | PTK2 | cna | amp     | TCGA     |
| TCGA-E9-A1NC | PTK2 | cna | amp     | TCGA     |
| TCGA-LL-A5YP | PTK2 | cna | gain    | TCGA     |
| MB-0346      | PTK2 | cna | amp     | METABRIC |
| MB-5107      | PTK2 | cna | amp     | METABRIC |
| MB-5465      | PTK2 | cna | gain    | METABRIC |
| MB-6060      | PTK2 | cna | gain    | METABRIC |
| MB-6098      | PTK2 | cna | amp     | METABRIC |
| MB-7038      | PTK2 | cna | amp     | METABRIC |
| MB-7048      | PTK2 | cna | amp     | METABRIC |
| MB-0420      | PTK2 | cna | gain    | METABRIC |
| MTS-T0064    | PTK2 | cna | gain    | METABRIC |
| PD10014      | PTK2 | cna | gain    | BASIS    |
| PD11327      | PTK2 | cna | gain    | BASIS    |
| PD11742      | PTK2 | cna | gain    | BASIS    |
| PD13296      | PTK2 | cna | gain    | BASIS    |
| PD13297      | PTK2 | cna | gain    | BASIS    |
| PD13299      | PTK2 | cna | gain    | BASIS    |
| PD13771      | PTK2 | cna | hetloss | BASIS    |
| PD23562      | PTK2 | cna | amp     | BASIS    |
| PD23574      | PTK2 | cna | gain    | BASIS    |
| PD23578      | PTK2 | cna | gain    | BASIS    |
| PD24186      | PTK2 | cna | amp     | BASIS    |
| PD24202      | PTK2 | cna | hetloss | BASIS    |
| PD24206      | PTK2 | cna | amp     | BASIS    |
| PD24337      | PTK2 | cna | gain    | BASIS    |
| PD3890       | PTK2 | cna | gain    | BASIS    |
| PD3905       | PTK2 | cna | gain    | BASIS    |
| PD4005       | PTK2 | cna | gain    | BASIS    |
| PD4006       | PTK2 | cna | amp     | BASIS    |
| PD4107       | PTK2 | cna | gain    | BASIS    |
| PD4826       | PTK2 | cna | amp     | BASIS    |
| PD5930       | PTK2 | cna | gain    | BASIS    |
| PD5935       | PTK2 | cna | amp     | BASIS    |
| PD5945       | PTK2 | cna | amp     | BASIS    |
| PD5948       | PTK2 | cna | gain    | BASIS    |
| PD6406       | PTK2 | cna | amp     | BASIS    |
| PD6413       | PTK2 | cna | gain    | BASIS    |
| PD6731       | PTK2 | cna | gain    | BASIS    |
| PD7067       | PTK2 | cna | amp     | BASIS    |
| PD7215       | PTK2 | cna | amp     | BASIS    |
| PD8621       | PTK2 | cna | gain    | BASIS    |
| PD8980       | PTK2 | cna | amp     | BASIS    |
| PD9004       | PTK2 | cna | amp     | BASIS    |
| PD9585       | PTK2 | cna | gain    | BASIS    |

|                   |        |     |         |            |
|-------------------|--------|-----|---------|------------|
| PD9702            | PTK2   | cna | gain    | BASIS      |
| TCGA-A2-A25B      | RECQL4 | cna | gain    | TCGA       |
| TCGA-AN-A0XU      | RECQL4 | cna | gain    | TCGA       |
| TCGA-AO-A0JL      | RECQL4 | cna | amp     | TCGA       |
| TCGA-BH-A0AW      | RECQL4 | cna | gain    | TCGA       |
| TCGA-BH-A0C0      | RECQL4 | cna | amp     | TCGA       |
| TCGA-BH-A18R      | RECQL4 | cna | amp     | TCGA       |
| TCGA-BH-A1FU      | RECQL4 | cna | hetloss | TCGA       |
| TCGA-C8-A12L      | RECQL4 | cna | gain    | TCGA       |
| TCGA-D8-A27M      | RECQL4 | cna | amp     | TCGA       |
| TCGA-E2-A1L7      | RECQL4 | cna | amp     | TCGA       |
| TCGA-E9-A1NC      | RECQL4 | cna | amp     | TCGA       |
| TCGA-LL-A5YP      | RECQL4 | cna | gain    | TCGA       |
| MB-0346           | RECQL4 | cna | amp     | METABRIC   |
| MB-5107           | RECQL4 | cna | amp     | METABRIC   |
| MB-5465           | RECQL4 | cna | gain    | METABRIC   |
| MB-6060           | RECQL4 | cna | gain    | METABRIC   |
| MB-6098           | RECQL4 | cna | amp     | METABRIC   |
| MB-7038           | RECQL4 | cna | amp     | METABRIC   |
| MB-7048           | RECQL4 | cna | amp     | METABRIC   |
| P-0002237-T01-IM3 | RECQL4 | cna | amp     | MSK-IMPACT |
| P-0010758-T01-IM5 | RECQL4 | cna | amp     | MSK-IMPACT |
| PD10014           | RECQL4 | cna | gain    | BASIS      |
| PD11327           | RECQL4 | cna | gain    | BASIS      |
| PD11742           | RECQL4 | cna | gain    | BASIS      |
| PD13297           | RECQL4 | cna | gain    | BASIS      |
| PD13299           | RECQL4 | cna | gain    | BASIS      |
| PD13771           | RECQL4 | cna | hetloss | BASIS      |
| PD22355           | RECQL4 | cna | gain    | BASIS      |
| PD23562           | RECQL4 | cna | amp     | BASIS      |
| PD23574           | RECQL4 | cna | gain    | BASIS      |
| PD23578           | RECQL4 | cna | hetloss | BASIS      |
| PD24186           | RECQL4 | cna | amp     | BASIS      |
| PD24202           | RECQL4 | cna | hetloss | BASIS      |
| PD24206           | RECQL4 | cna | amp     | BASIS      |
| PD24337           | RECQL4 | cna | gain    | BASIS      |
| PD3890            | RECQL4 | cna | gain    | BASIS      |
| PD3905            | RECQL4 | cna | gain    | BASIS      |
| PD4005            | RECQL4 | cna | gain    | BASIS      |
| PD4006            | RECQL4 | cna | amp     | BASIS      |
| PD4107            | RECQL4 | cna | gain    | BASIS      |
| PD4826            | RECQL4 | cna | amp     | BASIS      |
| PD5930            | RECQL4 | cna | gain    | BASIS      |
| PD5935            | RECQL4 | cna | amp     | BASIS      |
| PD5945            | RECQL4 | cna | amp     | BASIS      |
| PD5948            | RECQL4 | cna | gain    | BASIS      |
| PD6406            | RECQL4 | cna | amp     | BASIS      |

|              |        |     |         |          |
|--------------|--------|-----|---------|----------|
| PD6413       | RECQL4 | cna | gain    | BASIS    |
| PD6731       | RECQL4 | cna | gain    | BASIS    |
| PD7067       | RECQL4 | cna | amp     | BASIS    |
| PD7215       | RECQL4 | cna | amp     | BASIS    |
| PD8621       | RECQL4 | cna | gain    | BASIS    |
| PD8980       | RECQL4 | cna | amp     | BASIS    |
| PD9004       | RECQL4 | cna | amp     | BASIS    |
| PD9585       | RECQL4 | cna | gain    | BASIS    |
| PD9702       | RECQL4 | cna | amp     | BASIS    |
| TCGA-A2-A25B | RSPO2  | cna | gain    | TCGA     |
| TCGA-AN-A0XU | RSPO2  | cna | gain    | TCGA     |
| TCGA-AO-A0JL | RSPO2  | cna | amp     | TCGA     |
| TCGA-BH-A0AW | RSPO2  | cna | gain    | TCGA     |
| TCGA-BH-A0C0 | RSPO2  | cna | amp     | TCGA     |
| TCGA-BH-A18R | RSPO2  | cna | amp     | TCGA     |
| TCGA-BH-A1FU | RSPO2  | cna | amp     | TCGA     |
| TCGA-C8-A12L | RSPO2  | cna | gain    | TCGA     |
| TCGA-D8-A27M | RSPO2  | cna | amp     | TCGA     |
| TCGA-E2-A1L7 | RSPO2  | cna | gain    | TCGA     |
| TCGA-E9-A1NC | RSPO2  | cna | amp     | TCGA     |
| TCGA-LL-A5YP | RSPO2  | cna | amp     | TCGA     |
| MB-0346      | RSPO2  | cna | amp     | METABRIC |
| MB-2827      | RSPO2  | cna | amp     | METABRIC |
| MB-5070      | RSPO2  | cna | gain    | METABRIC |
| MB-5107      | RSPO2  | cna | amp     | METABRIC |
| MB-5465      | RSPO2  | cna | gain    | METABRIC |
| MB-6060      | RSPO2  | cna | amp     | METABRIC |
| MB-6098      | RSPO2  | cna | amp     | METABRIC |
| MB-7038      | RSPO2  | cna | amp     | METABRIC |
| MB-7048      | RSPO2  | cna | gain    | METABRIC |
| MB-0420      | RSPO2  | cna | gain    | METABRIC |
| PD10014      | RSPO2  | cna | gain    | BASIS    |
| PD11327      | RSPO2  | cna | amp     | BASIS    |
| PD11742      | RSPO2  | cna | gain    | BASIS    |
| PD13296      | RSPO2  | cna | hetloss | BASIS    |
| PD13299      | RSPO2  | cna | amp     | BASIS    |
| PD13771      | RSPO2  | cna | gain    | BASIS    |
| PD23562      | RSPO2  | cna | amp     | BASIS    |
| PD23574      | RSPO2  | cna | gain    | BASIS    |
| PD23578      | RSPO2  | cna | gain    | BASIS    |
| PD24186      | RSPO2  | cna | amp     | BASIS    |
| PD24202      | RSPO2  | cna | gain    | BASIS    |
| PD24206      | RSPO2  | cna | amp     | BASIS    |
| PD24337      | RSPO2  | cna | gain    | BASIS    |
| PD3890       | RSPO2  | cna | gain    | BASIS    |
| PD3905       | RSPO2  | cna | gain    | BASIS    |
| PD4005       | RSPO2  | cna | gain    | BASIS    |

|              |       |     |         |          |
|--------------|-------|-----|---------|----------|
| PD4006       | RSPO2 | cna | gain    | BASIS    |
| PD4107       | RSPO2 | cna | gain    | BASIS    |
| PD4826       | RSPO2 | cna | amp     | BASIS    |
| PD4967       | RSPO2 | cna | gain    | BASIS    |
| PD5930       | RSPO2 | cna | gain    | BASIS    |
| PD5935       | RSPO2 | cna | gain    | BASIS    |
| PD5945       | RSPO2 | cna | amp     | BASIS    |
| PD5948       | RSPO2 | cna | amp     | BASIS    |
| PD6406       | RSPO2 | cna | gain    | BASIS    |
| PD6413       | RSPO2 | cna | gain    | BASIS    |
| PD7067       | RSPO2 | cna | amp     | BASIS    |
| PD7215       | RSPO2 | cna | amp     | BASIS    |
| PD8621       | RSPO2 | cna | gain    | BASIS    |
| PD8980       | RSPO2 | cna | gain    | BASIS    |
| PD9004       | RSPO2 | cna | amp     | BASIS    |
| PD9585       | RSPO2 | cna | gain    | BASIS    |
| PD9702       | RSPO2 | cna | amp     | BASIS    |
| TCGA-A2-A25B | EXT1  | cna | gain    | TCGA     |
| TCGA-AN-A0XU | EXT1  | cna | gain    | TCGA     |
| TCGA-AO-A0JL | EXT1  | cna | amp     | TCGA     |
| TCGA-BH-A0AW | EXT1  | cna | gain    | TCGA     |
| TCGA-BH-A0C0 | EXT1  | cna | amp     | TCGA     |
| TCGA-BH-A18R | EXT1  | cna | amp     | TCGA     |
| TCGA-BH-A1FU | EXT1  | cna | amp     | TCGA     |
| TCGA-C8-A12L | EXT1  | cna | gain    | TCGA     |
| TCGA-D8-A27M | EXT1  | cna | amp     | TCGA     |
| TCGA-E2-A1L7 | EXT1  | cna | gain    | TCGA     |
| TCGA-E9-A1NC | EXT1  | cna | amp     | TCGA     |
| TCGA-LL-A5YP | EXT1  | cna | amp     | TCGA     |
| MB-0346      | EXT1  | cna | amp     | METABRIC |
| MB-2827      | EXT1  | cna | amp     | METABRIC |
| MB-5070      | EXT1  | cna | amp     | METABRIC |
| MB-5107      | EXT1  | cna | amp     | METABRIC |
| MB-5465      | EXT1  | cna | amp     | METABRIC |
| MB-6060      | EXT1  | cna | gain    | METABRIC |
| MB-6098      | EXT1  | cna | amp     | METABRIC |
| MB-7038      | EXT1  | cna | amp     | METABRIC |
| MB-7048      | EXT1  | cna | gain    | METABRIC |
| MB-0420      | EXT1  | cna | gain    | METABRIC |
| PD10014      | EXT1  | cna | gain    | BASIS    |
| PD11327      | EXT1  | cna | amp     | BASIS    |
| PD11742      | EXT1  | cna | gain    | BASIS    |
| PD13296      | EXT1  | cna | hetloss | BASIS    |
| PD13299      | EXT1  | cna | amp     | BASIS    |
| PD13771      | EXT1  | cna | gain    | BASIS    |
| PD23562      | EXT1  | cna | amp     | BASIS    |
| PD23574      | EXT1  | cna | amp     | BASIS    |



|              |        |     |         |          |
|--------------|--------|-----|---------|----------|
| PD23578      | EXT1   | cna | gain    | BASIS    |
| PD24202      | EXT1   | cna | gain    | BASIS    |
| PD24206      | EXT1   | cna | amp     | BASIS    |
| PD24337      | EXT1   | cna | gain    | BASIS    |
| PD3890       | EXT1   | cna | gain    | BASIS    |
| PD3905       | EXT1   | cna | gain    | BASIS    |
| PD4005       | EXT1   | cna | gain    | BASIS    |
| PD4006       | EXT1   | cna | gain    | BASIS    |
| PD4107       | EXT1   | cna | gain    | BASIS    |
| PD4826       | EXT1   | cna | amp     | BASIS    |
| PD5930       | EXT1   | cna | gain    | BASIS    |
| PD5935       | EXT1   | cna | gain    | BASIS    |
| PD5945       | EXT1   | cna | amp     | BASIS    |
| PD5948       | EXT1   | cna | amp     | BASIS    |
| PD6406       | EXT1   | cna | gain    | BASIS    |
| PD6413       | EXT1   | cna | gain    | BASIS    |
| PD6731       | EXT1   | cna | gain    | BASIS    |
| PD7067       | EXT1   | cna | amp     | BASIS    |
| PD7215       | EXT1   | cna | amp     | BASIS    |
| PD8621       | EXT1   | cna | gain    | BASIS    |
| PD8980       | EXT1   | cna | gain    | BASIS    |
| PD9004       | EXT1   | cna | amp     | BASIS    |
| PD9585       | EXT1   | cna | gain    | BASIS    |
| PD9702       | EXT1   | cna | amp     | BASIS    |
| TCGA-AO-A0JL | PIK3R2 | cna | gain    | TCGA     |
| TCGA-BH-A0AW | PIK3R2 | cna | gain    | TCGA     |
| TCGA-BH-A0C0 | PIK3R2 | cna | gain    | TCGA     |
| TCGA-BH-A1FU | PIK3R2 | cna | hetloss | TCGA     |
| TCGA-C8-A12L | PIK3R2 | cna | gain    | TCGA     |
| TCGA-D8-A27M | PIK3R2 | cna | hetloss | TCGA     |
| TCGA-EW-A10X | PIK3R2 | cna | hetloss | TCGA     |
| TCGA-LL-A5YP | PIK3R2 | cna | hetloss | TCGA     |
| MB-0346      | PIK3R2 | cna | hetloss | METABRIC |
| MB-2827      | PIK3R2 | cna | hetloss | METABRIC |
| MB-6060      | PIK3R2 | cna | gain    | METABRIC |
| MB-6098      | PIK3R2 | cna | hetloss | METABRIC |
| MB-0420      | PIK3R2 | cna | hetloss | METABRIC |
| MTS-T0064    | PIK3R2 | cna | amp     | METABRIC |
| PD13299      | PIK3R2 | cna | gain    | BASIS    |
| PD14442      | PIK3R2 | cna | hetloss | BASIS    |
| PD22355      | PIK3R2 | cna | gain    | BASIS    |
| PD23562      | PIK3R2 | cna | gain    | BASIS    |
| PD23574      | PIK3R2 | cna | gain    | BASIS    |
| PD24186      | PIK3R2 | cna | gain    | BASIS    |
| PD24206      | PIK3R2 | cna | hetloss | BASIS    |
| PD3890       | PIK3R2 | cna | hetloss | BASIS    |
| PD3905       | PIK3R2 | cna | gain    | BASIS    |

|              |        |     |         |          |
|--------------|--------|-----|---------|----------|
| PD4006       | PIK3R2 | cna | amp     | BASIS    |
| PD4107       | PIK3R2 | cna | gain    | BASIS    |
| PD4826       | PIK3R2 | cna | gain    | BASIS    |
| PD4967       | PIK3R2 | cna | hetloss | BASIS    |
| PD5930       | PIK3R2 | cna | gain    | BASIS    |
| PD5935       | PIK3R2 | cna | gain    | BASIS    |
| PD5945       | PIK3R2 | cna | amp     | BASIS    |
| PD5948       | PIK3R2 | cna | gain    | BASIS    |
| PD7067       | PIK3R2 | cna | gain    | BASIS    |
| PD7215       | PIK3R2 | cna | amp     | BASIS    |
| PD9702       | PIK3R2 | cna | gain    | BASIS    |
| PD13299      | PIK3R2 | cna | gain    | BASIS    |
| PD14442      | PIK3R2 | cna | hetloss | BASIS    |
| PD22355      | PIK3R2 | cna | gain    | BASIS    |
| PD23562      | PIK3R2 | cna | gain    | BASIS    |
| PD23574      | PIK3R2 | cna | gain    | BASIS    |
| PD24186      | PIK3R2 | cna | gain    | BASIS    |
| PD24206      | PIK3R2 | cna | hetloss | BASIS    |
| PD3890       | PIK3R2 | cna | hetloss | BASIS    |
| PD3905       | PIK3R2 | cna | gain    | BASIS    |
| PD4006       | PIK3R2 | cna | amp     | BASIS    |
| PD4107       | PIK3R2 | cna | gain    | BASIS    |
| PD4826       | PIK3R2 | cna | gain    | BASIS    |
| PD4967       | PIK3R2 | cna | hetloss | BASIS    |
| PD5930       | PIK3R2 | cna | gain    | BASIS    |
| PD5935       | PIK3R2 | cna | gain    | BASIS    |
| PD5945       | PIK3R2 | cna | amp     | BASIS    |
| PD5948       | PIK3R2 | cna | gain    | BASIS    |
| PD7067       | PIK3R2 | cna | gain    | BASIS    |
| PD7215       | PIK3R2 | cna | amp     | BASIS    |
| PD9702       | PIK3R2 | cna | gain    | BASIS    |
| TCGA-A2-A25B | EPPK1  | cna | gain    | TCGA     |
| TCGA-AN-A0XU | EPPK1  | cna | hetloss | TCGA     |
| TCGA-AO-A0JL | EPPK1  | cna | amp     | TCGA     |
| TCGA-BH-A0AW | EPPK1  | cna | gain    | TCGA     |
| TCGA-BH-A0C0 | EPPK1  | cna | amp     | TCGA     |
| TCGA-BH-A18R | EPPK1  | cna | amp     | TCGA     |
| TCGA-BH-A1FU | EPPK1  | cna | gain    | TCGA     |
| TCGA-C8-A12L | EPPK1  | cna | gain    | TCGA     |
| TCGA-D8-A27M | EPPK1  | cna | amp     | TCGA     |
| TCGA-E2-A1L7 | EPPK1  | cna | amp     | TCGA     |
| TCGA-E9-A1NC | EPPK1  | cna | amp     | TCGA     |
| TCGA-LL-A5YP | EPPK1  | cna | gain    | TCGA     |
| MB-0346      | EPPK1  | cna | amp     | METABRIC |
| MB-5107      | EPPK1  | cna | amp     | METABRIC |
| MB-5465      | EPPK1  | cna | gain    | METABRIC |
| MB-6060      | EPPK1  | cna | gain    | METABRIC |

|              |       |     |         |          |
|--------------|-------|-----|---------|----------|
| MB-6098      | EPPK1 | cna | amp     | METABRIC |
| MB-7038      | EPPK1 | cna | amp     | METABRIC |
| MB-7048      | EPPK1 | cna | amp     | METABRIC |
| PD10014      | EPPK1 | cna | gain    | BASIS    |
| PD11327      | EPPK1 | cna | gain    | BASIS    |
| PD11742      | EPPK1 | cna | gain    | BASIS    |
| PD13297      | EPPK1 | cna | gain    | BASIS    |
| PD13299      | EPPK1 | cna | gain    | BASIS    |
| PD13771      | EPPK1 | cna | hetloss | BASIS    |
| PD22355      | EPPK1 | cna | gain    | BASIS    |
| PD23562      | EPPK1 | cna | amp     | BASIS    |
| PD23574      | EPPK1 | cna | gain    | BASIS    |
| PD23578      | EPPK1 | cna | hetloss | BASIS    |
| PD24186      | EPPK1 | cna | amp     | BASIS    |
| PD24202      | EPPK1 | cna | hetloss | BASIS    |
| PD24206      | EPPK1 | cna | amp     | BASIS    |
| PD24337      | EPPK1 | cna | gain    | BASIS    |
| PD3890       | EPPK1 | cna | gain    | BASIS    |
| PD3905       | EPPK1 | cna | gain    | BASIS    |
| PD4005       | EPPK1 | cna | gain    | BASIS    |
| PD4006       | EPPK1 | cna | amp     | BASIS    |
| PD4107       | EPPK1 | cna | gain    | BASIS    |
| PD4826       | EPPK1 | cna | amp     | BASIS    |
| PD5930       | EPPK1 | cna | gain    | BASIS    |
| PD5935       | EPPK1 | cna | amp     | BASIS    |
| PD5945       | EPPK1 | cna | amp     | BASIS    |
| PD5948       | EPPK1 | cna | gain    | BASIS    |
| PD6406       | EPPK1 | cna | amp     | BASIS    |
| PD6413       | EPPK1 | cna | gain    | BASIS    |
| PD6731       | EPPK1 | cna | gain    | BASIS    |
| PD7067       | EPPK1 | cna | amp     | BASIS    |
| PD7215       | EPPK1 | cna | amp     | BASIS    |
| PD8621       | EPPK1 | cna | gain    | BASIS    |
| PD8980       | EPPK1 | cna | amp     | BASIS    |
| PD9004       | EPPK1 | cna | amp     | BASIS    |
| PD9585       | EPPK1 | cna | gain    | BASIS    |
| PD9702       | EPPK1 | cna | amp     | BASIS    |
| TCGA-A2-A25B | PLEC  | cna | gain    | TCGA     |
| TCGA-AN-A0XU | PLEC  | cna | hetloss | TCGA     |
| TCGA-AO-A0JL | PLEC  | cna | amp     | TCGA     |
| TCGA-BH-A0AW | PLEC  | cna | gain    | TCGA     |
| TCGA-BH-A0C0 | PLEC  | cna | amp     | TCGA     |
| TCGA-BH-A18R | PLEC  | cna | amp     | TCGA     |
| TCGA-BH-A1FU | PLEC  | cna | gain    | TCGA     |
| TCGA-C8-A12L | PLEC  | cna | gain    | TCGA     |
| TCGA-D8-A27M | PLEC  | cna | amp     | TCGA     |
| TCGA-E2-A1L7 | PLEC  | cna | amp     | TCGA     |

|              |       |     |         |          |
|--------------|-------|-----|---------|----------|
| TCGA-E9-A1NC | PLEC  | cna | amp     | TCGA     |
| TCGA-LL-A5YP | PLEC  | cna | gain    | TCGA     |
| MB-0346      | PLEC  | cna | amp     | METABRIC |
| MB-5107      | PLEC  | cna | amp     | METABRIC |
| MB-5465      | PLEC  | cna | gain    | METABRIC |
| MB-6060      | PLEC  | cna | gain    | METABRIC |
| MB-6098      | PLEC  | cna | amp     | METABRIC |
| MB-7038      | PLEC  | cna | amp     | METABRIC |
| MB-7048      | PLEC  | cna | amp     | METABRIC |
| PD10014      | PLEC  | cna | gain    | BASIS    |
| PD11327      | PLEC  | cna | gain    | BASIS    |
| PD11742      | PLEC  | cna | gain    | BASIS    |
| PD13297      | PLEC  | cna | gain    | BASIS    |
| PD13299      | PLEC  | cna | gain    | BASIS    |
| PD13771      | PLEC  | cna | hetloss | BASIS    |
| PD22355      | PLEC  | cna | gain    | BASIS    |
| PD23562      | PLEC  | cna | amp     | BASIS    |
| PD23574      | PLEC  | cna | gain    | BASIS    |
| PD23578      | PLEC  | cna | hetloss | BASIS    |
| PD24186      | PLEC  | cna | amp     | BASIS    |
| PD24202      | PLEC  | cna | hetloss | BASIS    |
| PD24206      | PLEC  | cna | amp     | BASIS    |
| PD24337      | PLEC  | cna | gain    | BASIS    |
| PD3890       | PLEC  | cna | gain    | BASIS    |
| PD3905       | PLEC  | cna | gain    | BASIS    |
| PD4005       | PLEC  | cna | gain    | BASIS    |
| PD4006       | PLEC  | cna | amp     | BASIS    |
| PD4107       | PLEC  | cna | gain    | BASIS    |
| PD4826       | PLEC  | cna | amp     | BASIS    |
| PD5930       | PLEC  | cna | gain    | BASIS    |
| PD5935       | PLEC  | cna | amp     | BASIS    |
| PD5945       | PLEC  | cna | amp     | BASIS    |
| PD5948       | PLEC  | cna | gain    | BASIS    |
| PD6406       | PLEC  | cna | amp     | BASIS    |
| PD6413       | PLEC  | cna | gain    | BASIS    |
| PD6731       | PLEC  | cna | gain    | BASIS    |
| PD7067       | PLEC  | cna | amp     | BASIS    |
| PD7215       | PLEC  | cna | amp     | BASIS    |
| PD8621       | PLEC  | cna | gain    | BASIS    |
| PD8980       | PLEC  | cna | amp     | BASIS    |
| PD9004       | PLEC  | cna | amp     | BASIS    |
| PD9585       | PLEC  | cna | gain    | BASIS    |
| PD9702       | PLEC  | cna | amp     | BASIS    |
| TCGA-A2-A25B | H3F3A | cna | amp     | TCGA     |
| TCGA-AN-A0XU | H3F3A | cna | gain    | TCGA     |
| TCGA-AO-A0JL | H3F3A | cna | gain    | TCGA     |
| TCGA-BH-A0AW | H3F3A | cna | gain    | TCGA     |

|              |       |     |         |          |
|--------------|-------|-----|---------|----------|
| TCGA-BH-A0C0 | H3F3A | cna | gain    | TCGA     |
| TCGA-BH-A18R | H3F3A | cna | amp     | TCGA     |
| TCGA-BH-A1FU | H3F3A | cna | gain    | TCGA     |
| TCGA-C8-A12L | H3F3A | cna | amp     | TCGA     |
| TCGA-E2-A1L7 | H3F3A | cna | gain    | TCGA     |
| TCGA-E9-A1NC | H3F3A | cna | gain    | TCGA     |
| TCGA-EW-A10X | H3F3A | cna | gain    | TCGA     |
| TCGA-LL-A5YP | H3F3A | cna | gain    | TCGA     |
| MB-0346      | H3F3A | cna | gain    | METABRIC |
| MB-2827      | H3F3A | cna | amp     | METABRIC |
| MB-5070      | H3F3A | cna | gain    | METABRIC |
| MB-5107      | H3F3A | cna | gain    | METABRIC |
| MB-5465      | H3F3A | cna | gain    | METABRIC |
| MB-6060      | H3F3A | cna | gain    | METABRIC |
| MB-6098      | H3F3A | cna | gain    | METABRIC |
| MB-7032      | H3F3A | cna | gain    | METABRIC |
| MB-7038      | H3F3A | cna | amp     | METABRIC |
| MB-7048      | H3F3A | cna | gain    | METABRIC |
| MB-0420      | H3F3A | cna | gain    | METABRIC |
| PD10014      | H3F3A | cna | gain    | BASIS    |
| PD11742      | H3F3A | cna | gain    | BASIS    |
| PD13296      | H3F3A | cna | hetloss | BASIS    |
| PD13299      | H3F3A | cna | gain    | BASIS    |
| PD13771      | H3F3A | cna | hetloss | BASIS    |
| PD14442      | H3F3A | cna | gain    | BASIS    |
| PD22355      | H3F3A | cna | gain    | BASIS    |
| PD23562      | H3F3A | cna | gain    | BASIS    |
| PD23574      | H3F3A | cna | gain    | BASIS    |
| PD24186      | H3F3A | cna | amp     | BASIS    |
| PD24202      | H3F3A | cna | gain    | BASIS    |
| PD24206      | H3F3A | cna | gain    | BASIS    |
| PD3890       | H3F3A | cna | gain    | BASIS    |
| PD3905       | H3F3A | cna | gain    | BASIS    |
| PD4005       | H3F3A | cna | gain    | BASIS    |
| PD4006       | H3F3A | cna | amp     | BASIS    |
| PD4107       | H3F3A | cna | gain    | BASIS    |
| PD4826       | H3F3A | cna | gain    | BASIS    |
| PD5935       | H3F3A | cna | gain    | BASIS    |
| PD5945       | H3F3A | cna | amp     | BASIS    |
| PD5948       | H3F3A | cna | gain    | BASIS    |
| PD6413       | H3F3A | cna | gain    | BASIS    |
| PD7067       | H3F3A | cna | gain    | BASIS    |
| PD7215       | H3F3A | cna | amp     | BASIS    |
| PD8621       | H3F3A | cna | gain    | BASIS    |
| PD8980       | H3F3A | cna | amp     | BASIS    |
| PD9004       | H3F3A | cna | gain    | BASIS    |
| PD9585       | H3F3A | cna | hetloss | BASIS    |

|                   |       |     |         |            |
|-------------------|-------|-----|---------|------------|
| PD9702            | H3F3A | cna | amp     | BASIS      |
| TCGA-A2-A25B      | NBN   | cna | gain    | TCGA       |
| TCGA-AO-A0JL      | NBN   | cna | amp     | TCGA       |
| TCGA-BH-A0AW      | NBN   | cna | gain    | TCGA       |
| TCGA-BH-A0C0      | NBN   | cna | amp     | TCGA       |
| TCGA-BH-A18R      | NBN   | cna | amp     | TCGA       |
| TCGA-BH-A1FU      | NBN   | cna | gain    | TCGA       |
| TCGA-C8-A12L      | NBN   | cna | gain    | TCGA       |
| TCGA-D8-A27M      | NBN   | cna | amp     | TCGA       |
| TCGA-E2-A1L7      | NBN   | cna | gain    | TCGA       |
| TCGA-E9-A1NC      | NBN   | cna | amp     | TCGA       |
| TCGA-LL-A5YP      | NBN   | cna | amp     | TCGA       |
| MB-0346           | NBN   | cna | amp     | METABRIC   |
| MB-2827           | NBN   | cna | amp     | METABRIC   |
| MB-5107           | NBN   | cna | gain    | METABRIC   |
| MB-5465           | NBN   | cna | hetloss | METABRIC   |
| MB-6060           | NBN   | cna | gain    | METABRIC   |
| MB-6098           | NBN   | cna | gain    | METABRIC   |
| MB-7038           | NBN   | cna | gain    | METABRIC   |
| MB-7048           | NBN   | cna | gain    | METABRIC   |
| MB-0420           | NBN   | cna | gain    | METABRIC   |
| P-0002237-T01-IM3 | NBN   | cna | amp     | MSK-IMPACT |
| P-0010758-T01-IM5 | NBN   | cna | amp     | MSK-IMPACT |
| PD10014           | NBN   | cna | amp     | BASIS      |
| PD11327           | NBN   | cna | amp     | BASIS      |
| PD11742           | NBN   | cna | gain    | BASIS      |
| PD13296           | NBN   | cna | hetloss | BASIS      |
| PD13299           | NBN   | cna | amp     | BASIS      |
| PD13771           | NBN   | cna | gain    | BASIS      |
| PD23562           | NBN   | cna | amp     | BASIS      |
| PD23574           | NBN   | cna | gain    | BASIS      |
| PD23578           | NBN   | cna | gain    | BASIS      |
| PD24186           | NBN   | cna | gain    | BASIS      |
| PD24202           | NBN   | cna | gain    | BASIS      |
| PD24206           | NBN   | cna | amp     | BASIS      |
| PD3890            | NBN   | cna | gain    | BASIS      |
| PD3905            | NBN   | cna | gain    | BASIS      |
| PD4005            | NBN   | cna | hetloss | BASIS      |
| PD4006            | NBN   | cna | gain    | BASIS      |
| PD4826            | NBN   | cna | amp     | BASIS      |
| PD5930            | NBN   | cna | gain    | BASIS      |
| PD5935            | NBN   | cna | gain    | BASIS      |
| PD5945            | NBN   | cna | gain    | BASIS      |
| PD5948            | NBN   | cna | gain    | BASIS      |
| PD6406            | NBN   | cna | gain    | BASIS      |
| PD6413            | NBN   | cna | gain    | BASIS      |
| PD7067            | NBN   | cna | amp     | BASIS      |

|              |       |     |         |          |
|--------------|-------|-----|---------|----------|
| PD7215       | NBN   | cna | amp     | BASIS    |
| PD8621       | NBN   | cna | gain    | BASIS    |
| PD8980       | NBN   | cna | gain    | BASIS    |
| PD9004       | NBN   | cna | gain    | BASIS    |
| PD9585       | NBN   | cna | gain    | BASIS    |
| PD9702       | NBN   | cna | amp     | BASIS    |
| TCGA-A2-A25B | NLRP3 | cna | amp     | TCGA     |
| TCGA-AO-A0JL | NLRP3 | cna | amp     | TCGA     |
| TCGA-BH-A0AW | NLRP3 | cna | gain    | TCGA     |
| TCGA-BH-A0C0 | NLRP3 | cna | hetloss | TCGA     |
| TCGA-BH-A18R | NLRP3 | cna | amp     | TCGA     |
| TCGA-BH-A1FU | NLRP3 | cna | gain    | TCGA     |
| TCGA-C8-A12L | NLRP3 | cna | amp     | TCGA     |
| TCGA-D8-A27M | NLRP3 | cna | hetloss | TCGA     |
| TCGA-E2-A1L7 | NLRP3 | cna | hetloss | TCGA     |
| TCGA-E9-A1NC | NLRP3 | cna | gain    | TCGA     |
| TCGA-EW-A10X | NLRP3 | cna | gain    | TCGA     |
| TCGA-LL-A5YP | NLRP3 | cna | gain    | TCGA     |
| MB-0346      | NLRP3 | cna | gain    | METABRIC |
| MB-5465      | NLRP3 | cna | gain    | METABRIC |
| MB-6060      | NLRP3 | cna | gain    | METABRIC |
| MB-6098      | NLRP3 | cna | amp     | METABRIC |
| MB-7032      | NLRP3 | cna | gain    | METABRIC |
| MB-7038      | NLRP3 | cna | amp     | METABRIC |
| MB-7048      | NLRP3 | cna | gain    | METABRIC |
| MB-0420      | NLRP3 | cna | gain    | METABRIC |
| MTS-T0064    | NLRP3 | cna | hetloss | METABRIC |
| PD10014      | NLRP3 | cna | gain    | BASIS    |
| PD11742      | NLRP3 | cna | gain    | BASIS    |
| PD13296      | NLRP3 | cna | gain    | BASIS    |
| PD13299      | NLRP3 | cna | gain    | BASIS    |
| PD13771      | NLRP3 | cna | hetloss | BASIS    |
| PD14442      | NLRP3 | cna | gain    | BASIS    |
| PD22355      | NLRP3 | cna | gain    | BASIS    |
| PD23562      | NLRP3 | cna | gain    | BASIS    |
| PD23574      | NLRP3 | cna | gain    | BASIS    |
| PD24186      | NLRP3 | cna | amp     | BASIS    |
| PD24202      | NLRP3 | cna | gain    | BASIS    |
| PD24206      | NLRP3 | cna | gain    | BASIS    |
| PD24337      | NLRP3 | cna | hetloss | BASIS    |
| PD3890       | NLRP3 | cna | gain    | BASIS    |
| PD3905       | NLRP3 | cna | gain    | BASIS    |
| PD4005       | NLRP3 | cna | gain    | BASIS    |
| PD4006       | NLRP3 | cna | amp     | BASIS    |
| PD4107       | NLRP3 | cna | gain    | BASIS    |
| PD4826       | NLRP3 | cna | gain    | BASIS    |
| PD5930       | NLRP3 | cna | gain    | BASIS    |

|              |       |     |         |          |
|--------------|-------|-----|---------|----------|
| PD5935       | NLRP3 | cna | gain    | BASIS    |
| PD5945       | NLRP3 | cna | amp     | BASIS    |
| PD5948       | NLRP3 | cna | amp     | BASIS    |
| PD6406       | NLRP3 | cna | gain    | BASIS    |
| PD7067       | NLRP3 | cna | gain    | BASIS    |
| PD7215       | NLRP3 | cna | amp     | BASIS    |
| PD8621       | NLRP3 | cna | gain    | BASIS    |
| PD8980       | NLRP3 | cna | amp     | BASIS    |
| PD9004       | NLRP3 | cna | gain    | BASIS    |
| PD9585       | NLRP3 | cna | gain    | BASIS    |
| PD9702       | NLRP3 | cna | amp     | BASIS    |
| TCGA-A2-A25B | OBSCN | cna | amp     | TCGA     |
| TCGA-AN-A0XU | OBSCN | cna | gain    | TCGA     |
| TCGA-AO-A0JL | OBSCN | cna | gain    | TCGA     |
| TCGA-BH-A0AW | OBSCN | cna | gain    | TCGA     |
| TCGA-BH-A0C0 | OBSCN | cna | gain    | TCGA     |
| TCGA-BH-A18R | OBSCN | cna | amp     | TCGA     |
| TCGA-BH-A1FU | OBSCN | cna | gain    | TCGA     |
| TCGA-C8-A12L | OBSCN | cna | amp     | TCGA     |
| TCGA-E2-A1L7 | OBSCN | cna | gain    | TCGA     |
| TCGA-E9-A1NC | OBSCN | cna | gain    | TCGA     |
| TCGA-EW-A10X | OBSCN | cna | gain    | TCGA     |
| TCGA-LL-A5YP | OBSCN | cna | gain    | TCGA     |
| MB-0346      | OBSCN | cna | gain    | METABRIC |
| MB-2827      | OBSCN | cna | amp     | METABRIC |
| MB-5070      | OBSCN | cna | gain    | METABRIC |
| MB-5107      | OBSCN | cna | gain    | METABRIC |
| MB-5465      | OBSCN | cna | gain    | METABRIC |
| MB-6060      | OBSCN | cna | gain    | METABRIC |
| MB-6098      | OBSCN | cna | gain    | METABRIC |
| MB-7032      | OBSCN | cna | gain    | METABRIC |
| MB-7038      | OBSCN | cna | amp     | METABRIC |
| MB-7048      | OBSCN | cna | gain    | METABRIC |
| MB-0420      | OBSCN | cna | gain    | METABRIC |
| PD10014      | OBSCN | cna | gain    | BASIS    |
| PD11742      | OBSCN | cna | gain    | BASIS    |
| PD13296      | OBSCN | cna | hetloss | BASIS    |
| PD13299      | OBSCN | cna | gain    | BASIS    |
| PD13771      | OBSCN | cna | hetloss | BASIS    |
| PD14442      | OBSCN | cna | gain    | BASIS    |
| PD22355      | OBSCN | cna | gain    | BASIS    |
| PD23562      | OBSCN | cna | gain    | BASIS    |
| PD23574      | OBSCN | cna | gain    | BASIS    |
| PD24186      | OBSCN | cna | amp     | BASIS    |
| PD24202      | OBSCN | cna | gain    | BASIS    |
| PD24206      | OBSCN | cna | gain    | BASIS    |
| PD3890       | OBSCN | cna | gain    | BASIS    |



|              |       |     |         |          |
|--------------|-------|-----|---------|----------|
| PD3905       | OBSCN | cna | gain    | BASIS    |
| PD4005       | OBSCN | cna | gain    | BASIS    |
| PD4006       | OBSCN | cna | amp     | BASIS    |
| PD4107       | OBSCN | cna | gain    | BASIS    |
| PD4826       | OBSCN | cna | gain    | BASIS    |
| PD5935       | OBSCN | cna | gain    | BASIS    |
| PD5945       | OBSCN | cna | amp     | BASIS    |
| PD5948       | OBSCN | cna | gain    | BASIS    |
| PD6413       | OBSCN | cna | gain    | BASIS    |
| PD7067       | OBSCN | cna | gain    | BASIS    |
| PD7215       | OBSCN | cna | amp     | BASIS    |
| PD8621       | OBSCN | cna | gain    | BASIS    |
| PD8980       | OBSCN | cna | amp     | BASIS    |
| PD9004       | OBSCN | cna | gain    | BASIS    |
| PD9585       | OBSCN | cna | hetloss | BASIS    |
| PD9702       | OBSCN | cna | amp     | BASIS    |
| TCGA-A2-A25B | PARP1 | cna | amp     | TCGA     |
| TCGA-AN-A0XU | PARP1 | cna | gain    | TCGA     |
| TCGA-AO-A0JL | PARP1 | cna | gain    | TCGA     |
| TCGA-BH-A0AW | PARP1 | cna | gain    | TCGA     |
| TCGA-BH-A0C0 | PARP1 | cna | gain    | TCGA     |
| TCGA-BH-A18R | PARP1 | cna | amp     | TCGA     |
| TCGA-BH-A1FU | PARP1 | cna | gain    | TCGA     |
| TCGA-C8-A12L | PARP1 | cna | amp     | TCGA     |
| TCGA-E2-A1L7 | PARP1 | cna | gain    | TCGA     |
| TCGA-E9-A1NC | PARP1 | cna | gain    | TCGA     |
| TCGA-EW-A10X | PARP1 | cna | gain    | TCGA     |
| TCGA-LL-A5YP | PARP1 | cna | gain    | TCGA     |
| MB-0346      | PARP1 | cna | gain    | METABRIC |
| MB-2827      | PARP1 | cna | amp     | METABRIC |
| MB-5070      | PARP1 | cna | gain    | METABRIC |
| MB-5107      | PARP1 | cna | gain    | METABRIC |
| MB-5465      | PARP1 | cna | gain    | METABRIC |
| MB-6060      | PARP1 | cna | gain    | METABRIC |
| MB-6098      | PARP1 | cna | gain    | METABRIC |
| MB-7032      | PARP1 | cna | gain    | METABRIC |
| MB-7038      | PARP1 | cna | amp     | METABRIC |
| MB-7048      | PARP1 | cna | gain    | METABRIC |
| MB-0420      | PARP1 | cna | gain    | METABRIC |
| PD10014      | PARP1 | cna | gain    | BASIS    |
| PD11742      | PARP1 | cna | gain    | BASIS    |
| PD13296      | PARP1 | cna | hetloss | BASIS    |
| PD13299      | PARP1 | cna | gain    | BASIS    |
| PD13771      | PARP1 | cna | hetloss | BASIS    |
| PD14442      | PARP1 | cna | gain    | BASIS    |
| PD22355      | PARP1 | cna | gain    | BASIS    |
| PD23562      | PARP1 | cna | gain    | BASIS    |

|              |         |     |         |          |
|--------------|---------|-----|---------|----------|
| PD23574      | PARP1   | cna | gain    | BASIS    |
| PD24186      | PARP1   | cna | amp     | BASIS    |
| PD24202      | PARP1   | cna | gain    | BASIS    |
| PD24206      | PARP1   | cna | gain    | BASIS    |
| PD3890       | PARP1   | cna | gain    | BASIS    |
| PD3905       | PARP1   | cna | gain    | BASIS    |
| PD4005       | PARP1   | cna | gain    | BASIS    |
| PD4006       | PARP1   | cna | amp     | BASIS    |
| PD4107       | PARP1   | cna | gain    | BASIS    |
| PD4826       | PARP1   | cna | gain    | BASIS    |
| PD5935       | PARP1   | cna | gain    | BASIS    |
| PD5945       | PARP1   | cna | amp     | BASIS    |
| PD5948       | PARP1   | cna | gain    | BASIS    |
| PD6413       | PARP1   | cna | gain    | BASIS    |
| PD7067       | PARP1   | cna | gain    | BASIS    |
| PD7215       | PARP1   | cna | amp     | BASIS    |
| PD8621       | PARP1   | cna | gain    | BASIS    |
| PD8980       | PARP1   | cna | amp     | BASIS    |
| PD9004       | PARP1   | cna | gain    | BASIS    |
| PD9585       | PARP1   | cna | hetloss | BASIS    |
| PD9702       | PARP1   | cna | amp     | BASIS    |
| TCGA-A2-A25B | B4GALT3 | cna | gain    | TCGA     |
| TCGA-AN-A0XU | B4GALT3 | cna | gain    | TCGA     |
| TCGA-AO-A0JL | B4GALT3 | cna | gain    | TCGA     |
| TCGA-BH-A0AW | B4GALT3 | cna | gain    | TCGA     |
| TCGA-BH-A0C0 | B4GALT3 | cna | gain    | TCGA     |
| TCGA-BH-A18R | B4GALT3 | cna | gain    | TCGA     |
| TCGA-BH-A1FU | B4GALT3 | cna | gain    | TCGA     |
| TCGA-C8-A12L | B4GALT3 | cna | gain    | TCGA     |
| TCGA-D8-A27M | B4GALT3 | cna | amp     | TCGA     |
| TCGA-E2-A1L7 | B4GALT3 | cna | gain    | TCGA     |
| TCGA-EW-A10X | B4GALT3 | cna | gain    | TCGA     |
| TCGA-LL-A5YP | B4GALT3 | cna | amp     | TCGA     |
| MB-0346      | B4GALT3 | cna | gain    | METABRIC |
| MB-2827      | B4GALT3 | cna | amp     | METABRIC |
| MB-5070      | B4GALT3 | cna | gain    | METABRIC |
| MB-5465      | B4GALT3 | cna | amp     | METABRIC |
| MB-6060      | B4GALT3 | cna | gain    | METABRIC |
| MB-6098      | B4GALT3 | cna | amp     | METABRIC |
| MB-7032      | B4GALT3 | cna | gain    | METABRIC |
| MB-7038      | B4GALT3 | cna | gain    | METABRIC |
| MB-0420      | B4GALT3 | cna | gain    | METABRIC |
| MTS-T0064    | B4GALT3 | cna | amp     | METABRIC |
| PD10014      | B4GALT3 | cna | gain    | BASIS    |
| PD11327      | B4GALT3 | cna | gain    | BASIS    |
| PD13297      | B4GALT3 | cna | gain    | BASIS    |
| PD13299      | B4GALT3 | cna | gain    | BASIS    |

|              |         |     |         |          |
|--------------|---------|-----|---------|----------|
| PD14442      | B4GALT3 | cna | gain    | BASIS    |
| PD22355      | B4GALT3 | cna | gain    | BASIS    |
| PD23562      | B4GALT3 | cna | amp     | BASIS    |
| PD23574      | B4GALT3 | cna | amp     | BASIS    |
| PD24186      | B4GALT3 | cna | gain    | BASIS    |
| PD24206      | B4GALT3 | cna | gain    | BASIS    |
| PD24337      | B4GALT3 | cna | gain    | BASIS    |
| PD3890       | B4GALT3 | cna | gain    | BASIS    |
| PD3905       | B4GALT3 | cna | gain    | BASIS    |
| PD4005       | B4GALT3 | cna | gain    | BASIS    |
| PD4006       | B4GALT3 | cna | gain    | BASIS    |
| PD4107       | B4GALT3 | cna | gain    | BASIS    |
| PD4826       | B4GALT3 | cna | gain    | BASIS    |
| PD5930       | B4GALT3 | cna | gain    | BASIS    |
| PD5935       | B4GALT3 | cna | gain    | BASIS    |
| PD5945       | B4GALT3 | cna | amp     | BASIS    |
| PD5948       | B4GALT3 | cna | gain    | BASIS    |
| PD6406       | B4GALT3 | cna | gain    | BASIS    |
| PD6413       | B4GALT3 | cna | gain    | BASIS    |
| PD7067       | B4GALT3 | cna | amp     | BASIS    |
| PD7215       | B4GALT3 | cna | gain    | BASIS    |
| PD8621       | B4GALT3 | cna | amp     | BASIS    |
| PD8980       | B4GALT3 | cna | gain    | BASIS    |
| PD9004       | B4GALT3 | cna | gain    | BASIS    |
| PD9702       | B4GALT3 | cna | gain    | BASIS    |
| TCGA-AN-A0XU | KMT2B   | cna | gain    | TCGA     |
| TCGA-AO-A0JL | KMT2B   | cna | hetloss | TCGA     |
| TCGA-BH-A0AW | KMT2B   | cna | gain    | TCGA     |
| TCGA-BH-A0C0 | KMT2B   | cna | hetloss | TCGA     |
| TCGA-BH-A1FU | KMT2B   | cna | hetloss | TCGA     |
| TCGA-C8-A12L | KMT2B   | cna | gain    | TCGA     |
| TCGA-D8-A27M | KMT2B   | cna | gain    | TCGA     |
| TCGA-EW-A10X | KMT2B   | cna | hetloss | TCGA     |
| TCGA-LL-A5YP | KMT2B   | cna | gain    | TCGA     |
| MB-0346      | KMT2B   | cna | hetloss | METABRIC |
| MB-6098      | KMT2B   | cna | gain    | METABRIC |
| MB-7038      | KMT2B   | cna | gain    | METABRIC |
| MB-7048      | KMT2B   | cna | hetloss | METABRIC |
| PD13296      | KMT2B   | cna | gain    | BASIS    |
| PD13299      | KMT2B   | cna | gain    | BASIS    |
| PD23562      | KMT2B   | cna | gain    | BASIS    |
| PD23574      | KMT2B   | cna | gain    | BASIS    |
| PD24186      | KMT2B   | cna | gain    | BASIS    |
| PD3905       | KMT2B   | cna | gain    | BASIS    |
| PD4006       | KMT2B   | cna | gain    | BASIS    |
| PD4826       | KMT2B   | cna | gain    | BASIS    |
| PD5935       | KMT2B   | cna | gain    | BASIS    |

|              |       |     |         |          |
|--------------|-------|-----|---------|----------|
| PD5945       | KMT2B | cna | gain    | BASIS    |
| PD5948       | KMT2B | cna | gain    | BASIS    |
| PD6406       | KMT2B | cna | gain    | BASIS    |
| PD7067       | KMT2B | cna | gain    | BASIS    |
| PD7215       | KMT2B | cna | gain    | BASIS    |
| PD8621       | KMT2B | cna | gain    | BASIS    |
| PD8980       | KMT2B | cna | hetloss | BASIS    |
| PD9004       | KMT2B | cna | hetloss | BASIS    |
| PD9585       | KMT2B | cna | gain    | BASIS    |
| PD9702       | KMT2B | cna | gain    | BASIS    |
| PD13296      | KMT2B | cna | gain    | BASIS    |
| PD13299      | KMT2B | cna | gain    | BASIS    |
| PD23562      | KMT2B | cna | gain    | BASIS    |
| PD23574      | KMT2B | cna | gain    | BASIS    |
| PD24186      | KMT2B | cna | gain    | BASIS    |
| PD3905       | KMT2B | cna | gain    | BASIS    |
| PD4006       | KMT2B | cna | gain    | BASIS    |
| PD4826       | KMT2B | cna | gain    | BASIS    |
| PD5935       | KMT2B | cna | gain    | BASIS    |
| PD5945       | KMT2B | cna | gain    | BASIS    |
| PD5948       | KMT2B | cna | gain    | BASIS    |
| PD6406       | KMT2B | cna | gain    | BASIS    |
| PD7067       | KMT2B | cna | gain    | BASIS    |
| PD7215       | KMT2B | cna | gain    | BASIS    |
| PD8621       | KMT2B | cna | gain    | BASIS    |
| PD8980       | KMT2B | cna | hetloss | BASIS    |
| PD9004       | KMT2B | cna | hetloss | BASIS    |
| PD9585       | KMT2B | cna | gain    | BASIS    |
| PD9702       | KMT2B | cna | gain    | BASIS    |
| TCGA-A2-A25B | SDHC  | cna | gain    | TCGA     |
| TCGA-AN-A0XU | SDHC  | cna | gain    | TCGA     |
| TCGA-AO-A0JL | SDHC  | cna | gain    | TCGA     |
| TCGA-BH-A0AW | SDHC  | cna | gain    | TCGA     |
| TCGA-BH-A0C0 | SDHC  | cna | gain    | TCGA     |
| TCGA-BH-A18R | SDHC  | cna | gain    | TCGA     |
| TCGA-BH-A1FU | SDHC  | cna | gain    | TCGA     |
| TCGA-C8-A12L | SDHC  | cna | gain    | TCGA     |
| TCGA-D8-A27M | SDHC  | cna | amp     | TCGA     |
| TCGA-E2-A1L7 | SDHC  | cna | gain    | TCGA     |
| TCGA-EW-A10X | SDHC  | cna | gain    | TCGA     |
| TCGA-LL-A5YP | SDHC  | cna | amp     | TCGA     |
| MB-0346      | SDHC  | cna | gain    | METABRIC |
| MB-2827      | SDHC  | cna | amp     | METABRIC |
| MB-5070      | SDHC  | cna | gain    | METABRIC |
| MB-5465      | SDHC  | cna | amp     | METABRIC |
| MB-6060      | SDHC  | cna | gain    | METABRIC |
| MB-6098      | SDHC  | cna | amp     | METABRIC |

|              |       |     |      |          |
|--------------|-------|-----|------|----------|
| MB-7032      | SDHC  | cna | gain | METABRIC |
| MB-7038      | SDHC  | cna | gain | METABRIC |
| MB-0420      | SDHC  | cna | gain | METABRIC |
| MTS-T0064    | SDHC  | cna | amp  | METABRIC |
| PD10014      | SDHC  | cna | gain | BASIS    |
| PD11327      | SDHC  | cna | gain | BASIS    |
| PD13297      | SDHC  | cna | gain | BASIS    |
| PD13299      | SDHC  | cna | gain | BASIS    |
| PD14442      | SDHC  | cna | gain | BASIS    |
| PD22355      | SDHC  | cna | gain | BASIS    |
| PD23562      | SDHC  | cna | amp  | BASIS    |
| PD23574      | SDHC  | cna | amp  | BASIS    |
| PD24186      | SDHC  | cna | gain | BASIS    |
| PD24206      | SDHC  | cna | gain | BASIS    |
| PD24337      | SDHC  | cna | gain | BASIS    |
| PD3890       | SDHC  | cna | gain | BASIS    |
| PD3905       | SDHC  | cna | gain | BASIS    |
| PD4005       | SDHC  | cna | gain | BASIS    |
| PD4006       | SDHC  | cna | gain | BASIS    |
| PD4107       | SDHC  | cna | gain | BASIS    |
| PD4826       | SDHC  | cna | gain | BASIS    |
| PD5930       | SDHC  | cna | gain | BASIS    |
| PD5935       | SDHC  | cna | gain | BASIS    |
| PD5945       | SDHC  | cna | amp  | BASIS    |
| PD5948       | SDHC  | cna | gain | BASIS    |
| PD6406       | SDHC  | cna | gain | BASIS    |
| PD6413       | SDHC  | cna | gain | BASIS    |
| PD7067       | SDHC  | cna | amp  | BASIS    |
| PD7215       | SDHC  | cna | gain | BASIS    |
| PD8621       | SDHC  | cna | amp  | BASIS    |
| PD8980       | SDHC  | cna | gain | BASIS    |
| PD9004       | SDHC  | cna | gain | BASIS    |
| PD9702       | SDHC  | cna | gain | BASIS    |
| TCGA-A2-A25B | COX6C | cna | gain | TCGA     |
| TCGA-AN-A0XU | COX6C | cna | gain | TCGA     |
| TCGA-AO-A0JL | COX6C | cna | amp  | TCGA     |
| TCGA-BH-A0AW | COX6C | cna | gain | TCGA     |
| TCGA-BH-A0C0 | COX6C | cna | amp  | TCGA     |
| TCGA-BH-A18R | COX6C | cna | amp  | TCGA     |
| TCGA-BH-A1FU | COX6C | cna | gain | TCGA     |
| TCGA-C8-A12L | COX6C | cna | gain | TCGA     |
| TCGA-D8-A27M | COX6C | cna | amp  | TCGA     |
| TCGA-E2-A1L7 | COX6C | cna | gain | TCGA     |
| TCGA-E9-A1NC | COX6C | cna | amp  | TCGA     |
| TCGA-LL-A5YP | COX6C | cna | amp  | TCGA     |
| MB-0346      | COX6C | cna | amp  | METABRIC |
| MB-2827      | COX6C | cna | amp  | METABRIC |

|              |       |     |         |          |
|--------------|-------|-----|---------|----------|
| MB-5107      | COX6C | cna | gain    | METABRIC |
| MB-6060      | COX6C | cna | amp     | METABRIC |
| MB-6098      | COX6C | cna | amp     | METABRIC |
| MB-7038      | COX6C | cna | gain    | METABRIC |
| MB-7048      | COX6C | cna | gain    | METABRIC |
| MB-0420      | COX6C | cna | gain    | METABRIC |
| PD10014      | COX6C | cna | amp     | BASIS    |
| PD11327      | COX6C | cna | amp     | BASIS    |
| PD11742      | COX6C | cna | gain    | BASIS    |
| PD13296      | COX6C | cna | hetloss | BASIS    |
| PD13299      | COX6C | cna | amp     | BASIS    |
| PD13771      | COX6C | cna | gain    | BASIS    |
| PD23562      | COX6C | cna | amp     | BASIS    |
| PD23574      | COX6C | cna | amp     | BASIS    |
| PD23578      | COX6C | cna | gain    | BASIS    |
| PD24186      | COX6C | cna | amp     | BASIS    |
| PD24206      | COX6C | cna | amp     | BASIS    |
| PD24337      | COX6C | cna | gain    | BASIS    |
| PD3890       | COX6C | cna | gain    | BASIS    |
| PD3905       | COX6C | cna | gain    | BASIS    |
| PD4006       | COX6C | cna | gain    | BASIS    |
| PD4107       | COX6C | cna | gain    | BASIS    |
| PD4826       | COX6C | cna | amp     | BASIS    |
| PD5930       | COX6C | cna | gain    | BASIS    |
| PD5935       | COX6C | cna | gain    | BASIS    |
| PD5945       | COX6C | cna | gain    | BASIS    |
| PD5948       | COX6C | cna | amp     | BASIS    |
| PD6406       | COX6C | cna | gain    | BASIS    |
| PD6413       | COX6C | cna | gain    | BASIS    |
| PD7067       | COX6C | cna | amp     | BASIS    |
| PD7215       | COX6C | cna | amp     | BASIS    |
| PD8621       | COX6C | cna | gain    | BASIS    |
| PD8980       | COX6C | cna | gain    | BASIS    |
| PD9004       | COX6C | cna | amp     | BASIS    |
| PD9585       | COX6C | cna | gain    | BASIS    |
| PD9702       | COX6C | cna | amp     | BASIS    |
| TCGA-A2-A25B | AKT3  | cna | amp     | TCGA     |
| TCGA-AO-A0JL | AKT3  | cna | amp     | TCGA     |
| TCGA-BH-A0AW | AKT3  | cna | gain    | TCGA     |
| TCGA-BH-A0C0 | AKT3  | cna | gain    | TCGA     |
| TCGA-BH-A18R | AKT3  | cna | amp     | TCGA     |
| TCGA-BH-A1FU | AKT3  | cna | gain    | TCGA     |
| TCGA-C8-A12L | AKT3  | cna | amp     | TCGA     |
| TCGA-E9-A1NC | AKT3  | cna | gain    | TCGA     |
| TCGA-EW-A10X | AKT3  | cna | gain    | TCGA     |
| TCGA-LL-A5YP | AKT3  | cna | gain    | TCGA     |
| MB-0346      | AKT3  | cna | gain    | METABRIC |

|              |       |     |         |          |
|--------------|-------|-----|---------|----------|
| MB-5070      | AKT3  | cna | gain    | METABRIC |
| MB-5465      | AKT3  | cna | gain    | METABRIC |
| MB-6060      | AKT3  | cna | gain    | METABRIC |
| MB-6098      | AKT3  | cna | amp     | METABRIC |
| MB-7032      | AKT3  | cna | gain    | METABRIC |
| MB-7038      | AKT3  | cna | amp     | METABRIC |
| MB-7048      | AKT3  | cna | gain    | METABRIC |
| MB-0420      | AKT3  | cna | gain    | METABRIC |
| PD10014      | AKT3  | cna | gain    | BASIS    |
| PD11742      | AKT3  | cna | gain    | BASIS    |
| PD13299      | AKT3  | cna | gain    | BASIS    |
| PD13771      | AKT3  | cna | hetloss | BASIS    |
| PD14442      | AKT3  | cna | gain    | BASIS    |
| PD22355      | AKT3  | cna | gain    | BASIS    |
| PD23562      | AKT3  | cna | gain    | BASIS    |
| PD23574      | AKT3  | cna | gain    | BASIS    |
| PD24186      | AKT3  | cna | amp     | BASIS    |
| PD24202      | AKT3  | cna | gain    | BASIS    |
| PD24337      | AKT3  | cna | hetloss | BASIS    |
| PD3890       | AKT3  | cna | gain    | BASIS    |
| PD3905       | AKT3  | cna | gain    | BASIS    |
| PD4005       | AKT3  | cna | gain    | BASIS    |
| PD4006       | AKT3  | cna | amp     | BASIS    |
| PD4107       | AKT3  | cna | gain    | BASIS    |
| PD4826       | AKT3  | cna | gain    | BASIS    |
| PD5930       | AKT3  | cna | gain    | BASIS    |
| PD5935       | AKT3  | cna | gain    | BASIS    |
| PD5945       | AKT3  | cna | amp     | BASIS    |
| PD5948       | AKT3  | cna | amp     | BASIS    |
| PD6406       | AKT3  | cna | gain    | BASIS    |
| PD6413       | AKT3  | cna | hetloss | BASIS    |
| PD7067       | AKT3  | cna | gain    | BASIS    |
| PD7215       | AKT3  | cna | amp     | BASIS    |
| PD8621       | AKT3  | cna | gain    | BASIS    |
| PD8980       | AKT3  | cna | amp     | BASIS    |
| PD9004       | AKT3  | cna | gain    | BASIS    |
| PD9585       | AKT3  | cna | gain    | BASIS    |
| PD9702       | AKT3  | cna | amp     | BASIS    |
| TCGA-A2-A25B | BRCA1 | cna | hetloss | TCGA     |
| TCGA-AN-A0XU | BRCA1 | cna | hetloss | TCGA     |
| TCGA-AO-A0JL | BRCA1 | cna | homdel  | TCGA     |
| TCGA-BH-A0AW | BRCA1 | cna | homdel  | TCGA     |
| TCGA-BH-A0C0 | BRCA1 | cna | homdel  | TCGA     |
| TCGA-BH-A18R | BRCA1 | cna | homdel  | TCGA     |
| TCGA-BH-A1FU | BRCA1 | cna | homdel  | TCGA     |
| TCGA-C8-A12L | BRCA1 | cna | homdel  | TCGA     |
| TCGA-D8-A27M | BRCA1 | cna | hetloss | TCGA     |

|                   |       |     |         |            |
|-------------------|-------|-----|---------|------------|
| TCGA-E2-A1L7      | BRCA1 | cna | homdel  | TCGA       |
| TCGA-E9-A1NC      | BRCA1 | cna | hetloss | TCGA       |
| TCGA-EW-A10X      | BRCA1 | cna | homdel  | TCGA       |
| MB-0346           | BRCA1 | cna | hetloss | METABRIC   |
| MB-2827           | BRCA1 | cna | homdel  | METABRIC   |
| MB-5070           | BRCA1 | cna | hetloss | METABRIC   |
| MB-5465           | BRCA1 | cna | hetloss | METABRIC   |
| MB-6060           | BRCA1 | cna | hetloss | METABRIC   |
| MB-6098           | BRCA1 | cna | hetloss | METABRIC   |
| MB-6271           | BRCA1 | cna | hetloss | METABRIC   |
| MB-7038           | BRCA1 | cna | hetloss | METABRIC   |
| MB-7048           | BRCA1 | cna | hetloss | METABRIC   |
| MB-0420           | BRCA1 | cna | hetloss | METABRIC   |
| P-0002023-T01-IM3 | BRCA1 | cna | homdel  | MSK-IMPACT |
| P-0002591-T01-IM3 | BRCA1 | cna | homdel  | MSK-IMPACT |
| P-0009557-T01-IM5 | BRCA1 | cna | homdel  | MSK-IMPACT |
| PD13296           | BRCA1 | cna | gain    | BASIS      |
| PD13297           | BRCA1 | cna | hetloss | BASIS      |
| PD13299           | BRCA1 | cna | gain    | BASIS      |
| PD13771           | BRCA1 | cna | hetloss | BASIS      |
| PD23561           | BRCA1 | cna | hetloss | BASIS      |
| PD23562           | BRCA1 | cna | gain    | BASIS      |
| PD23574           | BRCA1 | cna | gain    | BASIS      |
| PD24186           | BRCA1 | cna | gain    | BASIS      |
| PD24206           | BRCA1 | cna | homdel  | BASIS      |
| PD24337           | BRCA1 | cna | hetloss | BASIS      |
| PD3890            | BRCA1 | cna | hetloss | BASIS      |
| PD3905            | BRCA1 | cna | gain    | BASIS      |
| PD4006            | BRCA1 | cna | gain    | BASIS      |
| PD4826            | BRCA1 | cna | homdel  | BASIS      |
| PD4967            | BRCA1 | cna | homdel  | BASIS      |
| PD5945            | BRCA1 | cna | amp     | BASIS      |
| PD5948            | BRCA1 | cna | gain    | BASIS      |
| PD6406            | BRCA1 | cna | hetloss | BASIS      |
| PD6731            | BRCA1 | cna | hetloss | BASIS      |
| PD7067            | BRCA1 | cna | gain    | BASIS      |
| PD7215            | BRCA1 | cna | gain    | BASIS      |
| PD9004            | BRCA1 | cna | gain    | BASIS      |
| PD9585            | BRCA1 | cna | hetloss | BASIS      |
| PD9702            | BRCA1 | cna | amp     | BASIS      |
| TCGA-A2-A25B      | FH    | cna | amp     | TCGA       |
| TCGA-AO-A0JL      | FH    | cna | gain    | TCGA       |
| TCGA-BH-A0AW      | FH    | cna | gain    | TCGA       |
| TCGA-BH-A0C0      | FH    | cna | gain    | TCGA       |
| TCGA-BH-A18R      | FH    | cna | amp     | TCGA       |
| TCGA-BH-A1FU      | FH    | cna | gain    | TCGA       |
| TCGA-C8-A12L      | FH    | cna | amp     | TCGA       |



|              |         |     |         |          |
|--------------|---------|-----|---------|----------|
| TCGA-E2-A1L7 | FH      | cna | hetloss | TCGA     |
| TCGA-E9-A1NC | FH      | cna | gain    | TCGA     |
| TCGA-EW-A10X | FH      | cna | gain    | TCGA     |
| TCGA-LL-A5YP | FH      | cna | gain    | TCGA     |
| MB-0346      | FH      | cna | gain    | METABRIC |
| MB-5070      | FH      | cna | gain    | METABRIC |
| MB-5465      | FH      | cna | gain    | METABRIC |
| MB-6060      | FH      | cna | gain    | METABRIC |
| MB-6098      | FH      | cna | amp     | METABRIC |
| MB-7032      | FH      | cna | gain    | METABRIC |
| MB-7038      | FH      | cna | amp     | METABRIC |
| MB-7048      | FH      | cna | gain    | METABRIC |
| MB-0420      | FH      | cna | gain    | METABRIC |
| PD10014      | FH      | cna | gain    | BASIS    |
| PD11742      | FH      | cna | gain    | BASIS    |
| PD13299      | FH      | cna | gain    | BASIS    |
| PD13771      | FH      | cna | hetloss | BASIS    |
| PD14442      | FH      | cna | gain    | BASIS    |
| PD22355      | FH      | cna | gain    | BASIS    |
| PD23562      | FH      | cna | gain    | BASIS    |
| PD23574      | FH      | cna | gain    | BASIS    |
| PD24186      | FH      | cna | amp     | BASIS    |
| PD24202      | FH      | cna | gain    | BASIS    |
| PD24337      | FH      | cna | hetloss | BASIS    |
| PD3890       | FH      | cna | gain    | BASIS    |
| PD3905       | FH      | cna | gain    | BASIS    |
| PD4005       | FH      | cna | gain    | BASIS    |
| PD4006       | FH      | cna | amp     | BASIS    |
| PD4107       | FH      | cna | gain    | BASIS    |
| PD4826       | FH      | cna | gain    | BASIS    |
| PD5935       | FH      | cna | gain    | BASIS    |
| PD5945       | FH      | cna | amp     | BASIS    |
| PD5948       | FH      | cna | amp     | BASIS    |
| PD6406       | FH      | cna | gain    | BASIS    |
| PD6413       | FH      | cna | gain    | BASIS    |
| PD7067       | FH      | cna | gain    | BASIS    |
| PD7215       | FH      | cna | amp     | BASIS    |
| PD8621       | FH      | cna | gain    | BASIS    |
| PD8980       | FH      | cna | amp     | BASIS    |
| PD9004       | FH      | cna | gain    | BASIS    |
| PD9585       | FH      | cna | gain    | BASIS    |
| PD9702       | FH      | cna | amp     | BASIS    |
| TCGA-A2-A25B | RUNX1T1 | cna | gain    | TCGA     |
| TCGA-AO-A0JL | RUNX1T1 | cna | amp     | TCGA     |
| TCGA-BH-A0AW | RUNX1T1 | cna | gain    | TCGA     |
| TCGA-BH-A0C0 | RUNX1T1 | cna | amp     | TCGA     |
| TCGA-BH-A18R | RUNX1T1 | cna | amp     | TCGA     |

|              |         |     |         |          |
|--------------|---------|-----|---------|----------|
| TCGA-BH-A1FU | RUNX1T1 | cna | gain    | TCGA     |
| TCGA-C8-A12L | RUNX1T1 | cna | gain    | TCGA     |
| TCGA-D8-A27M | RUNX1T1 | cna | amp     | TCGA     |
| TCGA-E2-A1L7 | RUNX1T1 | cna | gain    | TCGA     |
| TCGA-E9-A1NC | RUNX1T1 | cna | amp     | TCGA     |
| TCGA-LL-A5YP | RUNX1T1 | cna | amp     | TCGA     |
| MB-0346      | RUNX1T1 | cna | amp     | METABRIC |
| MB-2827      | RUNX1T1 | cna | amp     | METABRIC |
| MB-5107      | RUNX1T1 | cna | gain    | METABRIC |
| MB-5465      | RUNX1T1 | cna | hetloss | METABRIC |
| MB-6060      | RUNX1T1 | cna | amp     | METABRIC |
| MB-6098      | RUNX1T1 | cna | gain    | METABRIC |
| MB-7038      | RUNX1T1 | cna | gain    | METABRIC |
| MB-7048      | RUNX1T1 | cna | gain    | METABRIC |
| MB-0420      | RUNX1T1 | cna | gain    | METABRIC |
| PD10014      | RUNX1T1 | cna | amp     | BASIS    |
| PD11327      | RUNX1T1 | cna | amp     | BASIS    |
| PD11742      | RUNX1T1 | cna | gain    | BASIS    |
| PD13296      | RUNX1T1 | cna | hetloss | BASIS    |
| PD13299      | RUNX1T1 | cna | amp     | BASIS    |
| PD13771      | RUNX1T1 | cna | gain    | BASIS    |
| PD23562      | RUNX1T1 | cna | amp     | BASIS    |
| PD23574      | RUNX1T1 | cna | amp     | BASIS    |
| PD23578      | RUNX1T1 | cna | gain    | BASIS    |
| PD24186      | RUNX1T1 | cna | gain    | BASIS    |
| PD24206      | RUNX1T1 | cna | amp     | BASIS    |
| PD3890       | RUNX1T1 | cna | gain    | BASIS    |
| PD3905       | RUNX1T1 | cna | gain    | BASIS    |
| PD4005       | RUNX1T1 | cna | hetloss | BASIS    |
| PD4006       | RUNX1T1 | cna | gain    | BASIS    |
| PD4826       | RUNX1T1 | cna | amp     | BASIS    |
| PD5930       | RUNX1T1 | cna | gain    | BASIS    |
| PD5935       | RUNX1T1 | cna | gain    | BASIS    |
| PD5945       | RUNX1T1 | cna | gain    | BASIS    |
| PD5948       | RUNX1T1 | cna | gain    | BASIS    |
| PD6406       | RUNX1T1 | cna | gain    | BASIS    |
| PD6413       | RUNX1T1 | cna | gain    | BASIS    |
| PD7067       | RUNX1T1 | cna | amp     | BASIS    |
| PD7215       | RUNX1T1 | cna | amp     | BASIS    |
| PD8621       | RUNX1T1 | cna | gain    | BASIS    |
| PD8980       | RUNX1T1 | cna | gain    | BASIS    |
| PD9004       | RUNX1T1 | cna | gain    | BASIS    |
| PD9585       | RUNX1T1 | cna | gain    | BASIS    |
| PD9702       | RUNX1T1 | cna | amp     | BASIS    |
| TCGA-A2-A25B | DDR2    | cna | gain    | TCGA     |
| TCGA-AN-A0XU | DDR2    | cna | gain    | TCGA     |
| TCGA-AO-A0JL | DDR2    | cna | gain    | TCGA     |

|              |      |     |         |          |
|--------------|------|-----|---------|----------|
| TCGA-BH-A0AW | DDR2 | cna | gain    | TCGA     |
| TCGA-BH-A0C0 | DDR2 | cna | gain    | TCGA     |
| TCGA-BH-A18R | DDR2 | cna | gain    | TCGA     |
| TCGA-BH-A1FU | DDR2 | cna | gain    | TCGA     |
| TCGA-C8-A12L | DDR2 | cna | gain    | TCGA     |
| TCGA-D8-A27M | DDR2 | cna | amp     | TCGA     |
| TCGA-E2-A1L7 | DDR2 | cna | gain    | TCGA     |
| TCGA-EW-A10X | DDR2 | cna | gain    | TCGA     |
| TCGA-LL-A5YP | DDR2 | cna | amp     | TCGA     |
| MB-0346      | DDR2 | cna | gain    | METABRIC |
| MB-5070      | DDR2 | cna | gain    | METABRIC |
| MB-5465      | DDR2 | cna | amp     | METABRIC |
| MB-6060      | DDR2 | cna | gain    | METABRIC |
| MB-6098      | DDR2 | cna | amp     | METABRIC |
| MB-7032      | DDR2 | cna | gain    | METABRIC |
| MB-7038      | DDR2 | cna | gain    | METABRIC |
| MB-0420      | DDR2 | cna | gain    | METABRIC |
| MTS-T0064    | DDR2 | cna | gain    | METABRIC |
| PD10014      | DDR2 | cna | gain    | BASIS    |
| PD11327      | DDR2 | cna | amp     | BASIS    |
| PD13297      | DDR2 | cna | gain    | BASIS    |
| PD13299      | DDR2 | cna | gain    | BASIS    |
| PD14442      | DDR2 | cna | gain    | BASIS    |
| PD22355      | DDR2 | cna | gain    | BASIS    |
| PD23562      | DDR2 | cna | amp     | BASIS    |
| PD23574      | DDR2 | cna | gain    | BASIS    |
| PD23578      | DDR2 | cna | gain    | BASIS    |
| PD24186      | DDR2 | cna | gain    | BASIS    |
| PD24206      | DDR2 | cna | gain    | BASIS    |
| PD3905       | DDR2 | cna | gain    | BASIS    |
| PD4005       | DDR2 | cna | gain    | BASIS    |
| PD4006       | DDR2 | cna | gain    | BASIS    |
| PD4107       | DDR2 | cna | gain    | BASIS    |
| PD4826       | DDR2 | cna | gain    | BASIS    |
| PD5935       | DDR2 | cna | gain    | BASIS    |
| PD5945       | DDR2 | cna | amp     | BASIS    |
| PD5948       | DDR2 | cna | gain    | BASIS    |
| PD6406       | DDR2 | cna | gain    | BASIS    |
| PD6413       | DDR2 | cna | gain    | BASIS    |
| PD7067       | DDR2 | cna | amp     | BASIS    |
| PD7215       | DDR2 | cna | gain    | BASIS    |
| PD8621       | DDR2 | cna | amp     | BASIS    |
| PD8980       | DDR2 | cna | gain    | BASIS    |
| PD9004       | DDR2 | cna | gain    | BASIS    |
| PD9702       | DDR2 | cna | gain    | BASIS    |
| TCGA-A2-A25B | ELF3 | cna | amp     | TCGA     |
| TCGA-AN-A0XU | ELF3 | cna | hetloss | TCGA     |

|              |      |     |         |          |
|--------------|------|-----|---------|----------|
| TCGA-AO-A0JL | ELF3 | cna | gain    | TCGA     |
| TCGA-BH-A0AW | ELF3 | cna | gain    | TCGA     |
| TCGA-BH-A0C0 | ELF3 | cna | gain    | TCGA     |
| TCGA-BH-A18R | ELF3 | cna | gain    | TCGA     |
| TCGA-BH-A1FU | ELF3 | cna | gain    | TCGA     |
| TCGA-C8-A12L | ELF3 | cna | gain    | TCGA     |
| TCGA-E2-A1L7 | ELF3 | cna | gain    | TCGA     |
| TCGA-E9-A1NC | ELF3 | cna | gain    | TCGA     |
| TCGA-EW-A10X | ELF3 | cna | gain    | TCGA     |
| TCGA-LL-A5YP | ELF3 | cna | gain    | TCGA     |
| MB-0346      | ELF3 | cna | gain    | METABRIC |
| MB-5107      | ELF3 | cna | gain    | METABRIC |
| MB-5465      | ELF3 | cna | gain    | METABRIC |
| MB-6060      | ELF3 | cna | gain    | METABRIC |
| MB-6098      | ELF3 | cna | gain    | METABRIC |
| MB-7032      | ELF3 | cna | gain    | METABRIC |
| MB-7048      | ELF3 | cna | gain    | METABRIC |
| PD10014      | ELF3 | cna | gain    | BASIS    |
| PD13296      | ELF3 | cna | hetloss | BASIS    |
| PD13297      | ELF3 | cna | gain    | BASIS    |
| PD13299      | ELF3 | cna | gain    | BASIS    |
| PD14442      | ELF3 | cna | gain    | BASIS    |
| PD23562      | ELF3 | cna | gain    | BASIS    |
| PD23574      | ELF3 | cna | gain    | BASIS    |
| PD23578      | ELF3 | cna | hetloss | BASIS    |
| PD24186      | ELF3 | cna | amp     | BASIS    |
| PD24206      | ELF3 | cna | gain    | BASIS    |
| PD24337      | ELF3 | cna | gain    | BASIS    |
| PD3890       | ELF3 | cna | gain    | BASIS    |
| PD3905       | ELF3 | cna | gain    | BASIS    |
| PD4005       | ELF3 | cna | gain    | BASIS    |
| PD4006       | ELF3 | cna | amp     | BASIS    |
| PD4107       | ELF3 | cna | gain    | BASIS    |
| PD4826       | ELF3 | cna | gain    | BASIS    |
| PD5935       | ELF3 | cna | gain    | BASIS    |
| PD5945       | ELF3 | cna | amp     | BASIS    |
| PD5948       | ELF3 | cna | gain    | BASIS    |
| PD6406       | ELF3 | cna | gain    | BASIS    |
| PD6413       | ELF3 | cna | gain    | BASIS    |
| PD6731       | ELF3 | cna | hetloss | BASIS    |
| PD7067       | ELF3 | cna | gain    | BASIS    |
| PD7215       | ELF3 | cna | amp     | BASIS    |
| PD8621       | ELF3 | cna | gain    | BASIS    |
| PD8980       | ELF3 | cna | amp     | BASIS    |
| PD9004       | ELF3 | cna | gain    | BASIS    |
| PD9702       | ELF3 | cna | amp     | BASIS    |
| TCGA-A2-A25B | ERC1 | cna | hetloss | TCGA     |

|              |      |     |         |          |
|--------------|------|-----|---------|----------|
| TCGA-AN-A0XU | ERC1 | cna | gain    | TCGA     |
| TCGA-AO-A0JL | ERC1 | cna | gain    | TCGA     |
| TCGA-BH-A0C0 | ERC1 | cna | hetloss | TCGA     |
| TCGA-BH-A18R | ERC1 | cna | gain    | TCGA     |
| TCGA-BH-A1FU | ERC1 | cna | hetloss | TCGA     |
| TCGA-C8-A12L | ERC1 | cna | gain    | TCGA     |
| TCGA-D8-A27M | ERC1 | cna | amp     | TCGA     |
| TCGA-E9-A1NC | ERC1 | cna | gain    | TCGA     |
| TCGA-LL-A5YP | ERC1 | cna | gain    | TCGA     |
| MB-0346      | ERC1 | cna | hetloss | METABRIC |
| MB-2827      | ERC1 | cna | amp     | METABRIC |
| MB-5070      | ERC1 | cna | amp     | METABRIC |
| MB-6060      | ERC1 | cna | gain    | METABRIC |
| MB-6098      | ERC1 | cna | gain    | METABRIC |
| MB-7048      | ERC1 | cna | gain    | METABRIC |
| MB-0420      | ERC1 | cna | gain    | METABRIC |
| MTS-T0064    | ERC1 | cna | amp     | METABRIC |
| PD10014      | ERC1 | cna | hetloss | BASIS    |
| PD11327      | ERC1 | cna | gain    | BASIS    |
| PD11742      | ERC1 | cna | gain    | BASIS    |
| PD13299      | ERC1 | cna | gain    | BASIS    |
| PD13771      | ERC1 | cna | hetloss | BASIS    |
| PD23562      | ERC1 | cna | amp     | BASIS    |
| PD23574      | ERC1 | cna | gain    | BASIS    |
| PD23578      | ERC1 | cna | gain    | BASIS    |
| PD24186      | ERC1 | cna | amp     | BASIS    |
| PD24202      | ERC1 | cna | gain    | BASIS    |
| PD24206      | ERC1 | cna | homdel  | BASIS    |
| PD24337      | ERC1 | cna | gain    | BASIS    |
| PD3890       | ERC1 | cna | gain    | BASIS    |
| PD3905       | ERC1 | cna | gain    | BASIS    |
| PD4005       | ERC1 | cna | gain    | BASIS    |
| PD4006       | ERC1 | cna | amp     | BASIS    |
| PD4107       | ERC1 | cna | gain    | BASIS    |
| PD4826       | ERC1 | cna | hetloss | BASIS    |
| PD4967       | ERC1 | cna | hetloss | BASIS    |
| PD5930       | ERC1 | cna | gain    | BASIS    |
| PD5935       | ERC1 | cna | gain    | BASIS    |
| PD5945       | ERC1 | cna | amp     | BASIS    |
| PD5948       | ERC1 | cna | gain    | BASIS    |
| PD6406       | ERC1 | cna | gain    | BASIS    |
| PD6413       | ERC1 | cna | gain    | BASIS    |
| PD6731       | ERC1 | cna | hetloss | BASIS    |
| PD7215       | ERC1 | cna | gain    | BASIS    |
| PD8621       | ERC1 | cna | gain    | BASIS    |
| PD9004       | ERC1 | cna | gain    | BASIS    |
| PD9702       | ERC1 | cna | gain    | BASIS    |

|              |       |     |         |          |
|--------------|-------|-----|---------|----------|
| TCGA-A2-A25B | KDM5A | cna | hetloss | TCGA     |
| TCGA-AN-A0XU | KDM5A | cna | gain    | TCGA     |
| TCGA-AO-A0JL | KDM5A | cna | gain    | TCGA     |
| TCGA-BH-A0C0 | KDM5A | cna | hetloss | TCGA     |
| TCGA-BH-A18R | KDM5A | cna | gain    | TCGA     |
| TCGA-BH-A1FU | KDM5A | cna | hetloss | TCGA     |
| TCGA-C8-A12L | KDM5A | cna | gain    | TCGA     |
| TCGA-D8-A27M | KDM5A | cna | amp     | TCGA     |
| TCGA-E9-A1NC | KDM5A | cna | gain    | TCGA     |
| TCGA-LL-A5YP | KDM5A | cna | gain    | TCGA     |
| MB-0346      | KDM5A | cna | hetloss | METABRIC |
| MB-2827      | KDM5A | cna | amp     | METABRIC |
| MB-5070      | KDM5A | cna | amp     | METABRIC |
| MB-6060      | KDM5A | cna | gain    | METABRIC |
| MB-6098      | KDM5A | cna | gain    | METABRIC |
| MB-7048      | KDM5A | cna | gain    | METABRIC |
| MB-0420      | KDM5A | cna | gain    | METABRIC |
| MTS-T0064    | KDM5A | cna | amp     | METABRIC |
| PD10014      | KDM5A | cna | hetloss | BASIS    |
| PD11327      | KDM5A | cna | gain    | BASIS    |
| PD11742      | KDM5A | cna | gain    | BASIS    |
| PD13299      | KDM5A | cna | gain    | BASIS    |
| PD13771      | KDM5A | cna | hetloss | BASIS    |
| PD22355      | KDM5A | cna | hetloss | BASIS    |
| PD23562      | KDM5A | cna | amp     | BASIS    |
| PD23574      | KDM5A | cna | gain    | BASIS    |
| PD23578      | KDM5A | cna | gain    | BASIS    |
| PD24186      | KDM5A | cna | amp     | BASIS    |
| PD24206      | KDM5A | cna | hetloss | BASIS    |
| PD24337      | KDM5A | cna | gain    | BASIS    |
| PD3890       | KDM5A | cna | gain    | BASIS    |
| PD3905       | KDM5A | cna | gain    | BASIS    |
| PD4005       | KDM5A | cna | gain    | BASIS    |
| PD4006       | KDM5A | cna | amp     | BASIS    |
| PD4107       | KDM5A | cna | amp     | BASIS    |
| PD4826       | KDM5A | cna | hetloss | BASIS    |
| PD4967       | KDM5A | cna | hetloss | BASIS    |
| PD5930       | KDM5A | cna | gain    | BASIS    |
| PD5935       | KDM5A | cna | gain    | BASIS    |
| PD5945       | KDM5A | cna | amp     | BASIS    |
| PD5948       | KDM5A | cna | gain    | BASIS    |
| PD6406       | KDM5A | cna | gain    | BASIS    |
| PD6413       | KDM5A | cna | gain    | BASIS    |
| PD6731       | KDM5A | cna | hetloss | BASIS    |
| PD7215       | KDM5A | cna | gain    | BASIS    |
| PD8621       | KDM5A | cna | gain    | BASIS    |
| PD9004       | KDM5A | cna | gain    | BASIS    |

|              |       |     |      |          |
|--------------|-------|-----|------|----------|
| PD9702       | KDM5A | cna | gain | BASIS    |
| TCGA-A2-A25B | NCSTN | cna | gain | TCGA     |
| TCGA-AN-A0XU | NCSTN | cna | gain | TCGA     |
| TCGA-AO-A0JL | NCSTN | cna | gain | TCGA     |
| TCGA-BH-A0AW | NCSTN | cna | gain | TCGA     |
| TCGA-BH-A0C0 | NCSTN | cna | gain | TCGA     |
| TCGA-BH-A18R | NCSTN | cna | gain | TCGA     |
| TCGA-BH-A1FU | NCSTN | cna | gain | TCGA     |
| TCGA-C8-A12L | NCSTN | cna | gain | TCGA     |
| TCGA-E2-A1L7 | NCSTN | cna | gain | TCGA     |
| TCGA-EW-A10X | NCSTN | cna | gain | TCGA     |
| TCGA-LL-A5YP | NCSTN | cna | amp  | TCGA     |
| MB-0346      | NCSTN | cna | gain | METABRIC |
| MB-2827      | NCSTN | cna | amp  | METABRIC |
| MB-5070      | NCSTN | cna | gain | METABRIC |
| MB-5465      | NCSTN | cna | amp  | METABRIC |
| MB-6060      | NCSTN | cna | gain | METABRIC |
| MB-6098      | NCSTN | cna | amp  | METABRIC |
| MB-7032      | NCSTN | cna | gain | METABRIC |
| MB-7038      | NCSTN | cna | gain | METABRIC |
| MB-0420      | NCSTN | cna | amp  | METABRIC |
| PD10014      | NCSTN | cna | gain | BASIS    |
| PD11327      | NCSTN | cna | amp  | BASIS    |
| PD13297      | NCSTN | cna | gain | BASIS    |
| PD13299      | NCSTN | cna | gain | BASIS    |
| PD14442      | NCSTN | cna | gain | BASIS    |
| PD22355      | NCSTN | cna | gain | BASIS    |
| PD23562      | NCSTN | cna | amp  | BASIS    |
| PD23574      | NCSTN | cna | amp  | BASIS    |
| PD24186      | NCSTN | cna | gain | BASIS    |
| PD24206      | NCSTN | cna | gain | BASIS    |
| PD3890       | NCSTN | cna | gain | BASIS    |
| PD3905       | NCSTN | cna | gain | BASIS    |
| PD4005       | NCSTN | cna | gain | BASIS    |
| PD4006       | NCSTN | cna | gain | BASIS    |
| PD4107       | NCSTN | cna | gain | BASIS    |
| PD4826       | NCSTN | cna | gain | BASIS    |
| PD5930       | NCSTN | cna | gain | BASIS    |
| PD5935       | NCSTN | cna | gain | BASIS    |
| PD5945       | NCSTN | cna | amp  | BASIS    |
| PD5948       | NCSTN | cna | gain | BASIS    |
| PD6406       | NCSTN | cna | gain | BASIS    |
| PD6413       | NCSTN | cna | gain | BASIS    |
| PD7067       | NCSTN | cna | amp  | BASIS    |
| PD7215       | NCSTN | cna | gain | BASIS    |
| PD8621       | NCSTN | cna | amp  | BASIS    |
| PD8980       | NCSTN | cna | gain | BASIS    |

|              |       |     |         |          |
|--------------|-------|-----|---------|----------|
| PD9004       | NCSTN | cna | gain    | BASIS    |
| PD9702       | NCSTN | cna | gain    | BASIS    |
| TCGA-A2-A25B | RAD52 | cna | hetloss | TCGA     |
| TCGA-AN-A0XU | RAD52 | cna | gain    | TCGA     |
| TCGA-AO-A0JL | RAD52 | cna | gain    | TCGA     |
| TCGA-BH-A0C0 | RAD52 | cna | hetloss | TCGA     |
| TCGA-BH-A18R | RAD52 | cna | gain    | TCGA     |
| TCGA-BH-A1FU | RAD52 | cna | hetloss | TCGA     |
| TCGA-C8-A12L | RAD52 | cna | gain    | TCGA     |
| TCGA-D8-A27M | RAD52 | cna | amp     | TCGA     |
| TCGA-E9-A1NC | RAD52 | cna | gain    | TCGA     |
| TCGA-LL-A5YP | RAD52 | cna | gain    | TCGA     |
| MB-0346      | RAD52 | cna | hetloss | METABRIC |
| MB-2827      | RAD52 | cna | amp     | METABRIC |
| MB-5070      | RAD52 | cna | amp     | METABRIC |
| MB-6060      | RAD52 | cna | gain    | METABRIC |
| MB-6098      | RAD52 | cna | gain    | METABRIC |
| MB-7048      | RAD52 | cna | gain    | METABRIC |
| MB-0420      | RAD52 | cna | gain    | METABRIC |
| MTS-T0064    | RAD52 | cna | amp     | METABRIC |
| PD10014      | RAD52 | cna | hetloss | BASIS    |
| PD11327      | RAD52 | cna | gain    | BASIS    |
| PD11742      | RAD52 | cna | gain    | BASIS    |
| PD13299      | RAD52 | cna | gain    | BASIS    |
| PD13771      | RAD52 | cna | hetloss | BASIS    |
| PD23562      | RAD52 | cna | amp     | BASIS    |
| PD23574      | RAD52 | cna | gain    | BASIS    |
| PD23578      | RAD52 | cna | gain    | BASIS    |
| PD24186      | RAD52 | cna | amp     | BASIS    |
| PD24202      | RAD52 | cna | gain    | BASIS    |
| PD24206      | RAD52 | cna | hetloss | BASIS    |
| PD24337      | RAD52 | cna | gain    | BASIS    |
| PD3890       | RAD52 | cna | gain    | BASIS    |
| PD3905       | RAD52 | cna | gain    | BASIS    |
| PD4005       | RAD52 | cna | gain    | BASIS    |
| PD4006       | RAD52 | cna | amp     | BASIS    |
| PD4107       | RAD52 | cna | gain    | BASIS    |
| PD4826       | RAD52 | cna | hetloss | BASIS    |
| PD4967       | RAD52 | cna | hetloss | BASIS    |
| PD5930       | RAD52 | cna | gain    | BASIS    |
| PD5935       | RAD52 | cna | gain    | BASIS    |
| PD5945       | RAD52 | cna | amp     | BASIS    |
| PD5948       | RAD52 | cna | gain    | BASIS    |
| PD6406       | RAD52 | cna | gain    | BASIS    |
| PD6413       | RAD52 | cna | gain    | BASIS    |
| PD6731       | RAD52 | cna | hetloss | BASIS    |
| PD7215       | RAD52 | cna | gain    | BASIS    |



|                   |       |     |         |            |
|-------------------|-------|-----|---------|------------|
| PD8621            | RAD52 | cna | gain    | BASIS      |
| PD9004            | RAD52 | cna | gain    | BASIS      |
| PD9702            | RAD52 | cna | gain    | BASIS      |
| TCGA-A2-A25B      | RARA  | cna | hetloss | TCGA       |
| TCGA-AN-A0XU      | RARA  | cna | hetloss | TCGA       |
| TCGA-AO-A0JL      | RARA  | cna | amp     | TCGA       |
| TCGA-BH-A0AW      | RARA  | cna | homdel  | TCGA       |
| TCGA-BH-A0C0      | RARA  | cna | gain    | TCGA       |
| TCGA-BH-A18R      | RARA  | cna | amp     | TCGA       |
| TCGA-BH-A1FU      | RARA  | cna | homdel  | TCGA       |
| TCGA-C8-A12L      | RARA  | cna | hetloss | TCGA       |
| TCGA-D8-A27M      | RARA  | cna | hetloss | TCGA       |
| TCGA-E2-A1L7      | RARA  | cna | hetloss | TCGA       |
| TCGA-E9-A1NC      | RARA  | cna | hetloss | TCGA       |
| MB-0346           | RARA  | cna | hetloss | METABRIC   |
| MB-2827           | RARA  | cna | hetloss | METABRIC   |
| MB-5070           | RARA  | cna | hetloss | METABRIC   |
| MB-5107           | RARA  | cna | gain    | METABRIC   |
| MB-5465           | RARA  | cna | hetloss | METABRIC   |
| MB-6060           | RARA  | cna | amp     | METABRIC   |
| MB-6098           | RARA  | cna | hetloss | METABRIC   |
| MB-6271           | RARA  | cna | hetloss | METABRIC   |
| MB-7038           | RARA  | cna | hetloss | METABRIC   |
| MB-7048           | RARA  | cna | gain    | METABRIC   |
| MB-0420           | RARA  | cna | hetloss | METABRIC   |
| P-0002023-T01-IM3 | RARA  | cna | amp     | MSK-IMPACT |
| P-0002858-T01-IM3 | RARA  | cna | amp     | MSK-IMPACT |
| P-0009557-T01-IM5 | RARA  | cna | homdel  | MSK-IMPACT |
| PD13297           | RARA  | cna | hetloss | BASIS      |
| PD13299           | RARA  | cna | gain    | BASIS      |
| PD13771           | RARA  | cna | hetloss | BASIS      |
| PD23561           | RARA  | cna | hetloss | BASIS      |
| PD23562           | RARA  | cna | gain    | BASIS      |
| PD23574           | RARA  | cna | gain    | BASIS      |
| PD24186           | RARA  | cna | gain    | BASIS      |
| PD24206           | RARA  | cna | hetloss | BASIS      |
| PD24337           | RARA  | cna | hetloss | BASIS      |
| PD3890            | RARA  | cna | hetloss | BASIS      |
| PD3905            | RARA  | cna | gain    | BASIS      |
| PD4005            | RARA  | cna | hetloss | BASIS      |
| PD4826            | RARA  | cna | hetloss | BASIS      |
| PD4967            | RARA  | cna | hetloss | BASIS      |
| PD5945            | RARA  | cna | amp     | BASIS      |
| PD5948            | RARA  | cna | gain    | BASIS      |
| PD6406            | RARA  | cna | hetloss | BASIS      |
| PD6731            | RARA  | cna | hetloss | BASIS      |
| PD7067            | RARA  | cna | gain    | BASIS      |

|                   |       |     |         |            |
|-------------------|-------|-----|---------|------------|
| PD7215            | RARA  | cna | gain    | BASIS      |
| PD9004            | RARA  | cna | gain    | BASIS      |
| PD9585            | RARA  | cna | hetloss | BASIS      |
| PD9702            | RARA  | cna | amp     | BASIS      |
| TCGA-A2-A25B      | STAT3 | cna | hetloss | TCGA       |
| TCGA-AN-A0XU      | STAT3 | cna | hetloss | TCGA       |
| TCGA-AO-A0JL      | STAT3 | cna | homdel  | TCGA       |
| TCGA-BH-A0AW      | STAT3 | cna | homdel  | TCGA       |
| TCGA-BH-A0C0      | STAT3 | cna | gain    | TCGA       |
| TCGA-BH-A18R      | STAT3 | cna | homdel  | TCGA       |
| TCGA-BH-A1FU      | STAT3 | cna | homdel  | TCGA       |
| TCGA-C8-A12L      | STAT3 | cna | hetloss | TCGA       |
| TCGA-D8-A27M      | STAT3 | cna | hetloss | TCGA       |
| TCGA-E2-A1L7      | STAT3 | cna | hetloss | TCGA       |
| TCGA-E9-A1NC      | STAT3 | cna | hetloss | TCGA       |
| MB-0346           | STAT3 | cna | hetloss | METABRIC   |
| MB-2827           | STAT3 | cna | hetloss | METABRIC   |
| MB-5070           | STAT3 | cna | hetloss | METABRIC   |
| MB-5107           | STAT3 | cna | gain    | METABRIC   |
| MB-5465           | STAT3 | cna | hetloss | METABRIC   |
| MB-6060           | STAT3 | cna | hetloss | METABRIC   |
| MB-6098           | STAT3 | cna | hetloss | METABRIC   |
| MB-6271           | STAT3 | cna | hetloss | METABRIC   |
| MB-7038           | STAT3 | cna | hetloss | METABRIC   |
| MB-7048           | STAT3 | cna | hetloss | METABRIC   |
| MB-0420           | STAT3 | cna | hetloss | METABRIC   |
| P-0009557-T01-IM5 | STAT3 | cna | homdel  | MSK-IMPACT |
| PD13296           | STAT3 | cna | gain    | BASIS      |
| PD13297           | STAT3 | cna | hetloss | BASIS      |
| PD13299           | STAT3 | cna | gain    | BASIS      |
| PD13771           | STAT3 | cna | hetloss | BASIS      |
| PD22355           | STAT3 | cna | hetloss | BASIS      |
| PD23561           | STAT3 | cna | hetloss | BASIS      |
| PD23562           | STAT3 | cna | gain    | BASIS      |
| PD23574           | STAT3 | cna | gain    | BASIS      |
| PD24186           | STAT3 | cna | gain    | BASIS      |
| PD24206           | STAT3 | cna | hetloss | BASIS      |
| PD24337           | STAT3 | cna | hetloss | BASIS      |
| PD3890            | STAT3 | cna | hetloss | BASIS      |
| PD3905            | STAT3 | cna | gain    | BASIS      |
| PD4006            | STAT3 | cna | gain    | BASIS      |
| PD4826            | STAT3 | cna | hetloss | BASIS      |
| PD4967            | STAT3 | cna | homdel  | BASIS      |
| PD5945            | STAT3 | cna | amp     | BASIS      |
| PD5948            | STAT3 | cna | gain    | BASIS      |
| PD6406            | STAT3 | cna | hetloss | BASIS      |
| PD6731            | STAT3 | cna | hetloss | BASIS      |

|                   |        |     |         |            |
|-------------------|--------|-----|---------|------------|
| PD7067            | STAT3  | cna | gain    | BASIS      |
| PD7215            | STAT3  | cna | gain    | BASIS      |
| PD9004            | STAT3  | cna | gain    | BASIS      |
| PD9585            | STAT3  | cna | hetloss | BASIS      |
| PD9702            | STAT3  | cna | amp     | BASIS      |
| TCGA-A2-A25B      | STAT5A | cna | hetloss | TCGA       |
| TCGA-AN-A0XU      | STAT5A | cna | hetloss | TCGA       |
| TCGA-AO-A0JL      | STAT5A | cna | homdel  | TCGA       |
| TCGA-BH-A0AW      | STAT5A | cna | homdel  | TCGA       |
| TCGA-BH-A0C0      | STAT5A | cna | gain    | TCGA       |
| TCGA-BH-A18R      | STAT5A | cna | homdel  | TCGA       |
| TCGA-BH-A1FU      | STAT5A | cna | homdel  | TCGA       |
| TCGA-C8-A12L      | STAT5A | cna | hetloss | TCGA       |
| TCGA-D8-A27M      | STAT5A | cna | hetloss | TCGA       |
| TCGA-E2-A1L7      | STAT5A | cna | hetloss | TCGA       |
| TCGA-E9-A1NC      | STAT5A | cna | hetloss | TCGA       |
| MB-0346           | STAT5A | cna | hetloss | METABRIC   |
| MB-2827           | STAT5A | cna | hetloss | METABRIC   |
| MB-5070           | STAT5A | cna | hetloss | METABRIC   |
| MB-5107           | STAT5A | cna | gain    | METABRIC   |
| MB-5465           | STAT5A | cna | hetloss | METABRIC   |
| MB-6060           | STAT5A | cna | hetloss | METABRIC   |
| MB-6098           | STAT5A | cna | hetloss | METABRIC   |
| MB-6271           | STAT5A | cna | hetloss | METABRIC   |
| MB-7038           | STAT5A | cna | hetloss | METABRIC   |
| MB-7048           | STAT5A | cna | hetloss | METABRIC   |
| MB-0420           | STAT5A | cna | hetloss | METABRIC   |
| P-0009557-T01-IM5 | STAT5A | cna | homdel  | MSK-IMPACT |
| PD13296           | STAT5A | cna | gain    | BASIS      |
| PD13297           | STAT5A | cna | hetloss | BASIS      |
| PD13299           | STAT5A | cna | gain    | BASIS      |
| PD13771           | STAT5A | cna | hetloss | BASIS      |
| PD22355           | STAT5A | cna | hetloss | BASIS      |
| PD23561           | STAT5A | cna | hetloss | BASIS      |
| PD23562           | STAT5A | cna | gain    | BASIS      |
| PD23574           | STAT5A | cna | gain    | BASIS      |
| PD24186           | STAT5A | cna | gain    | BASIS      |
| PD24206           | STAT5A | cna | hetloss | BASIS      |
| PD24337           | STAT5A | cna | hetloss | BASIS      |
| PD3890            | STAT5A | cna | hetloss | BASIS      |
| PD3905            | STAT5A | cna | gain    | BASIS      |
| PD4006            | STAT5A | cna | gain    | BASIS      |
| PD4826            | STAT5A | cna | hetloss | BASIS      |
| PD4967            | STAT5A | cna | hetloss | BASIS      |
| PD5945            | STAT5A | cna | amp     | BASIS      |
| PD5948            | STAT5A | cna | gain    | BASIS      |
| PD6406            | STAT5A | cna | hetloss | BASIS      |

|                   |        |     |         |            |
|-------------------|--------|-----|---------|------------|
| PD6731            | STAT5A | cna | hetloss | BASIS      |
| PD7067            | STAT5A | cna | gain    | BASIS      |
| PD7215            | STAT5A | cna | gain    | BASIS      |
| PD9004            | STAT5A | cna | gain    | BASIS      |
| PD9585            | STAT5A | cna | hetloss | BASIS      |
| PD9702            | STAT5A | cna | amp     | BASIS      |
| TCGA-A2-A25B      | STAT5B | cna | hetloss | TCGA       |
| TCGA-AN-A0XU      | STAT5B | cna | hetloss | TCGA       |
| TCGA-AO-A0JL      | STAT5B | cna | homdel  | TCGA       |
| TCGA-BH-A0AW      | STAT5B | cna | homdel  | TCGA       |
| TCGA-BH-A0C0      | STAT5B | cna | gain    | TCGA       |
| TCGA-BH-A18R      | STAT5B | cna | homdel  | TCGA       |
| TCGA-BH-A1FU      | STAT5B | cna | homdel  | TCGA       |
| TCGA-C8-A12L      | STAT5B | cna | hetloss | TCGA       |
| TCGA-D8-A27M      | STAT5B | cna | hetloss | TCGA       |
| TCGA-E2-A1L7      | STAT5B | cna | hetloss | TCGA       |
| TCGA-E9-A1NC      | STAT5B | cna | hetloss | TCGA       |
| MB-0346           | STAT5B | cna | hetloss | METABRIC   |
| MB-2827           | STAT5B | cna | hetloss | METABRIC   |
| MB-5070           | STAT5B | cna | hetloss | METABRIC   |
| MB-5107           | STAT5B | cna | gain    | METABRIC   |
| MB-5465           | STAT5B | cna | hetloss | METABRIC   |
| MB-6060           | STAT5B | cna | hetloss | METABRIC   |
| MB-6098           | STAT5B | cna | hetloss | METABRIC   |
| MB-6271           | STAT5B | cna | hetloss | METABRIC   |
| MB-7038           | STAT5B | cna | hetloss | METABRIC   |
| MB-7048           | STAT5B | cna | hetloss | METABRIC   |
| MB-0420           | STAT5B | cna | hetloss | METABRIC   |
| P-0009557-T01-IM5 | STAT5B | cna | homdel  | MSK-IMPACT |
| PD13296           | STAT5B | cna | gain    | BASIS      |
| PD13297           | STAT5B | cna | hetloss | BASIS      |
| PD13299           | STAT5B | cna | gain    | BASIS      |
| PD13771           | STAT5B | cna | hetloss | BASIS      |
| PD22355           | STAT5B | cna | hetloss | BASIS      |
| PD23561           | STAT5B | cna | hetloss | BASIS      |
| PD23562           | STAT5B | cna | gain    | BASIS      |
| PD23574           | STAT5B | cna | gain    | BASIS      |
| PD24186           | STAT5B | cna | gain    | BASIS      |
| PD24206           | STAT5B | cna | hetloss | BASIS      |
| PD24337           | STAT5B | cna | hetloss | BASIS      |
| PD3890            | STAT5B | cna | hetloss | BASIS      |
| PD3905            | STAT5B | cna | gain    | BASIS      |
| PD4006            | STAT5B | cna | gain    | BASIS      |
| PD4826            | STAT5B | cna | hetloss | BASIS      |
| PD4967            | STAT5B | cna | hetloss | BASIS      |
| PD5945            | STAT5B | cna | amp     | BASIS      |
| PD5948            | STAT5B | cna | gain    | BASIS      |

|              |        |     |         |          |
|--------------|--------|-----|---------|----------|
| PD6406       | STAT5B | cna | hetloss | BASIS    |
| PD6731       | STAT5B | cna | hetloss | BASIS    |
| PD7067       | STAT5B | cna | gain    | BASIS    |
| PD7215       | STAT5B | cna | gain    | BASIS    |
| PD9004       | STAT5B | cna | gain    | BASIS    |
| PD9585       | STAT5B | cna | hetloss | BASIS    |
| PD9702       | STAT5B | cna | amp     | BASIS    |
| TCGA-A2-A25B | WNK1   | cna | hetloss | TCGA     |
| TCGA-AN-A0XU | WNK1   | cna | gain    | TCGA     |
| TCGA-AO-A0JL | WNK1   | cna | gain    | TCGA     |
| TCGA-BH-A0C0 | WNK1   | cna | hetloss | TCGA     |
| TCGA-BH-A18R | WNK1   | cna | gain    | TCGA     |
| TCGA-BH-A1FU | WNK1   | cna | hetloss | TCGA     |
| TCGA-C8-A12L | WNK1   | cna | gain    | TCGA     |
| TCGA-D8-A27M | WNK1   | cna | amp     | TCGA     |
| TCGA-E9-A1NC | WNK1   | cna | gain    | TCGA     |
| TCGA-LL-A5YP | WNK1   | cna | gain    | TCGA     |
| MB-0346      | WNK1   | cna | hetloss | METABRIC |
| MB-2827      | WNK1   | cna | amp     | METABRIC |
| MB-5070      | WNK1   | cna | amp     | METABRIC |
| MB-6060      | WNK1   | cna | gain    | METABRIC |
| MB-6098      | WNK1   | cna | gain    | METABRIC |
| MB-7048      | WNK1   | cna | gain    | METABRIC |
| MB-0420      | WNK1   | cna | gain    | METABRIC |
| MTS-T0064    | WNK1   | cna | amp     | METABRIC |
| PD10014      | WNK1   | cna | hetloss | BASIS    |
| PD11327      | WNK1   | cna | gain    | BASIS    |
| PD11742      | WNK1   | cna | gain    | BASIS    |
| PD13299      | WNK1   | cna | gain    | BASIS    |
| PD13771      | WNK1   | cna | hetloss | BASIS    |
| PD23562      | WNK1   | cna | amp     | BASIS    |
| PD23574      | WNK1   | cna | gain    | BASIS    |
| PD23578      | WNK1   | cna | gain    | BASIS    |
| PD24186      | WNK1   | cna | amp     | BASIS    |
| PD24202      | WNK1   | cna | gain    | BASIS    |
| PD24206      | WNK1   | cna | hetloss | BASIS    |
| PD24337      | WNK1   | cna | gain    | BASIS    |
| PD3890       | WNK1   | cna | gain    | BASIS    |
| PD3905       | WNK1   | cna | gain    | BASIS    |
| PD4005       | WNK1   | cna | gain    | BASIS    |
| PD4006       | WNK1   | cna | amp     | BASIS    |
| PD4107       | WNK1   | cna | amp     | BASIS    |
| PD4826       | WNK1   | cna | hetloss | BASIS    |
| PD4967       | WNK1   | cna | hetloss | BASIS    |
| PD5930       | WNK1   | cna | gain    | BASIS    |
| PD5935       | WNK1   | cna | gain    | BASIS    |
| PD5945       | WNK1   | cna | amp     | BASIS    |

|                   |       |     |         |            |
|-------------------|-------|-----|---------|------------|
| PD5948            | WNK1  | cna | gain    | BASIS      |
| PD6406            | WNK1  | cna | gain    | BASIS      |
| PD6413            | WNK1  | cna | gain    | BASIS      |
| PD6731            | WNK1  | cna | hetloss | BASIS      |
| PD7215            | WNK1  | cna | gain    | BASIS      |
| PD8621            | WNK1  | cna | gain    | BASIS      |
| PD9004            | WNK1  | cna | gain    | BASIS      |
| PD9702            | WNK1  | cna | gain    | BASIS      |
| TCGA-A2-A25B      | BRIP1 | cna | amp     | TCGA       |
| TCGA-AN-A0XU      | BRIP1 | cna | gain    | TCGA       |
| TCGA-AO-A0JL      | BRIP1 | cna | hetloss | TCGA       |
| TCGA-BH-A0AW      | BRIP1 | cna | amp     | TCGA       |
| TCGA-BH-A0C0      | BRIP1 | cna | gain    | TCGA       |
| TCGA-BH-A18R      | BRIP1 | cna | amp     | TCGA       |
| TCGA-C8-A12L      | BRIP1 | cna | gain    | TCGA       |
| TCGA-D8-A27M      | BRIP1 | cna | hetloss | TCGA       |
| TCGA-EW-A10X      | BRIP1 | cna | amp     | TCGA       |
| TCGA-LL-A5YP      | BRIP1 | cna | amp     | TCGA       |
| MB-0346           | BRIP1 | cna | gain    | METABRIC   |
| MB-2827           | BRIP1 | cna | hetloss | METABRIC   |
| MB-5070           | BRIP1 | cna | hetloss | METABRIC   |
| MB-5107           | BRIP1 | cna | amp     | METABRIC   |
| MB-5323           | BRIP1 | cna | gain    | METABRIC   |
| MB-5465           | BRIP1 | cna | amp     | METABRIC   |
| MB-6060           | BRIP1 | cna | amp     | METABRIC   |
| MB-6098           | BRIP1 | cna | hetloss | METABRIC   |
| MB-6271           | BRIP1 | cna | hetloss | METABRIC   |
| MB-7048           | BRIP1 | cna | gain    | METABRIC   |
| MTS-T0064         | BRIP1 | cna | gain    | METABRIC   |
| P-0002023-T01-IM3 | BRIP1 | cna | amp     | MSK-IMPACT |
| P-0002858-T01-IM3 | BRIP1 | cna | amp     | MSK-IMPACT |
| PD11327           | BRIP1 | cna | gain    | BASIS      |
| PD11742           | BRIP1 | cna | gain    | BASIS      |
| PD13297           | BRIP1 | cna | hetloss | BASIS      |
| PD22355           | BRIP1 | cna | gain    | BASIS      |
| PD23561           | BRIP1 | cna | gain    | BASIS      |
| PD23562           | BRIP1 | cna | gain    | BASIS      |
| PD23574           | BRIP1 | cna | gain    | BASIS      |
| PD24186           | BRIP1 | cna | gain    | BASIS      |
| PD24206           | BRIP1 | cna | hetloss | BASIS      |
| PD24337           | BRIP1 | cna | hetloss | BASIS      |
| PD3905            | BRIP1 | cna | gain    | BASIS      |
| PD4006            | BRIP1 | cna | amp     | BASIS      |
| PD4826            | BRIP1 | cna | amp     | BASIS      |
| PD4967            | BRIP1 | cna | homdel  | BASIS      |
| PD5930            | BRIP1 | cna | gain    | BASIS      |
| PD5935            | BRIP1 | cna | amp     | BASIS      |

|              |       |     |         |          |
|--------------|-------|-----|---------|----------|
| PD5945       | BRIP1 | cna | amp     | BASIS    |
| PD5948       | BRIP1 | cna | gain    | BASIS    |
| PD7067       | BRIP1 | cna | gain    | BASIS    |
| PD7215       | BRIP1 | cna | gain    | BASIS    |
| PD8621       | BRIP1 | cna | gain    | BASIS    |
| PD8980       | BRIP1 | cna | gain    | BASIS    |
| PD9004       | BRIP1 | cna | gain    | BASIS    |
| PD9702       | BRIP1 | cna | gain    | BASIS    |
| TCGA-A2-A25B | BTG2  | cna | amp     | TCGA     |
| TCGA-AN-A0XU | BTG2  | cna | hetloss | TCGA     |
| TCGA-AO-A0JL | BTG2  | cna | gain    | TCGA     |
| TCGA-BH-A0AW | BTG2  | cna | gain    | TCGA     |
| TCGA-BH-A0C0 | BTG2  | cna | gain    | TCGA     |
| TCGA-BH-A18R | BTG2  | cna | gain    | TCGA     |
| TCGA-BH-A1FU | BTG2  | cna | gain    | TCGA     |
| TCGA-C8-A12L | BTG2  | cna | gain    | TCGA     |
| TCGA-E2-A1L7 | BTG2  | cna | gain    | TCGA     |
| TCGA-E9-A1NC | BTG2  | cna | gain    | TCGA     |
| TCGA-EW-A10X | BTG2  | cna | gain    | TCGA     |
| TCGA-LL-A5YP | BTG2  | cna | hetloss | TCGA     |
| MB-0346      | BTG2  | cna | gain    | METABRIC |
| MB-5107      | BTG2  | cna | gain    | METABRIC |
| MB-5465      | BTG2  | cna | gain    | METABRIC |
| MB-6060      | BTG2  | cna | gain    | METABRIC |
| MB-6098      | BTG2  | cna | gain    | METABRIC |
| MB-7032      | BTG2  | cna | gain    | METABRIC |
| MB-7038      | BTG2  | cna | gain    | METABRIC |
| MB-7048      | BTG2  | cna | gain    | METABRIC |
| PD10014      | BTG2  | cna | gain    | BASIS    |
| PD13296      | BTG2  | cna | hetloss | BASIS    |
| PD13299      | BTG2  | cna | gain    | BASIS    |
| PD14442      | BTG2  | cna | gain    | BASIS    |
| PD23562      | BTG2  | cna | gain    | BASIS    |
| PD23574      | BTG2  | cna | gain    | BASIS    |
| PD24186      | BTG2  | cna | amp     | BASIS    |
| PD24206      | BTG2  | cna | gain    | BASIS    |
| PD24337      | BTG2  | cna | gain    | BASIS    |
| PD3890       | BTG2  | cna | gain    | BASIS    |
| PD3905       | BTG2  | cna | gain    | BASIS    |
| PD4005       | BTG2  | cna | gain    | BASIS    |
| PD4006       | BTG2  | cna | amp     | BASIS    |
| PD4107       | BTG2  | cna | gain    | BASIS    |
| PD4826       | BTG2  | cna | gain    | BASIS    |
| PD5935       | BTG2  | cna | gain    | BASIS    |
| PD5945       | BTG2  | cna | amp     | BASIS    |
| PD5948       | BTG2  | cna | gain    | BASIS    |
| PD6406       | BTG2  | cna | gain    | BASIS    |

|              |       |     |         |          |
|--------------|-------|-----|---------|----------|
| PD6413       | BTG2  | cna | gain    | BASIS    |
| PD6731       | BTG2  | cna | hetloss | BASIS    |
| PD7067       | BTG2  | cna | gain    | BASIS    |
| PD7215       | BTG2  | cna | amp     | BASIS    |
| PD8621       | BTG2  | cna | gain    | BASIS    |
| PD8980       | BTG2  | cna | amp     | BASIS    |
| PD9004       | BTG2  | cna | gain    | BASIS    |
| PD9702       | BTG2  | cna | amp     | BASIS    |
| TCGA-A2-A25B | CDC73 | cna | amp     | TCGA     |
| TCGA-AN-A0XU | CDC73 | cna | hetloss | TCGA     |
| TCGA-AO-A0JL | CDC73 | cna | gain    | TCGA     |
| TCGA-BH-A0AW | CDC73 | cna | gain    | TCGA     |
| TCGA-BH-A0C0 | CDC73 | cna | gain    | TCGA     |
| TCGA-BH-A18R | CDC73 | cna | gain    | TCGA     |
| TCGA-BH-A1FU | CDC73 | cna | gain    | TCGA     |
| TCGA-C8-A12L | CDC73 | cna | amp     | TCGA     |
| TCGA-E2-A1L7 | CDC73 | cna | gain    | TCGA     |
| TCGA-E9-A1NC | CDC73 | cna | hetloss | TCGA     |
| TCGA-EW-A10X | CDC73 | cna | gain    | TCGA     |
| TCGA-LL-A5YP | CDC73 | cna | gain    | TCGA     |
| MB-0346      | CDC73 | cna | gain    | METABRIC |
| MB-5107      | CDC73 | cna | gain    | METABRIC |
| MB-5465      | CDC73 | cna | amp     | METABRIC |
| MB-6060      | CDC73 | cna | gain    | METABRIC |
| MB-6098      | CDC73 | cna | gain    | METABRIC |
| MB-7032      | CDC73 | cna | gain    | METABRIC |
| MB-7038      | CDC73 | cna | gain    | METABRIC |
| MB-7048      | CDC73 | cna | gain    | METABRIC |
| PD10014      | CDC73 | cna | gain    | BASIS    |
| PD11327      | CDC73 | cna | gain    | BASIS    |
| PD13297      | CDC73 | cna | gain    | BASIS    |
| PD13299      | CDC73 | cna | gain    | BASIS    |
| PD14442      | CDC73 | cna | gain    | BASIS    |
| PD22355      | CDC73 | cna | gain    | BASIS    |
| PD23562      | CDC73 | cna | gain    | BASIS    |
| PD24186      | CDC73 | cna | amp     | BASIS    |
| PD24206      | CDC73 | cna | gain    | BASIS    |
| PD24337      | CDC73 | cna | gain    | BASIS    |
| PD3890       | CDC73 | cna | gain    | BASIS    |
| PD3905       | CDC73 | cna | amp     | BASIS    |
| PD4005       | CDC73 | cna | gain    | BASIS    |
| PD4006       | CDC73 | cna | gain    | BASIS    |
| PD4107       | CDC73 | cna | gain    | BASIS    |
| PD4826       | CDC73 | cna | gain    | BASIS    |
| PD5935       | CDC73 | cna | gain    | BASIS    |
| PD5945       | CDC73 | cna | amp     | BASIS    |
| PD5948       | CDC73 | cna | gain    | BASIS    |



|              |        |     |      |          |
|--------------|--------|-----|------|----------|
| PD6406       | CDC73  | cna | gain | BASIS    |
| PD6413       | CDC73  | cna | gain | BASIS    |
| PD7067       | CDC73  | cna | amp  | BASIS    |
| PD7215       | CDC73  | cna | amp  | BASIS    |
| PD8621       | CDC73  | cna | gain | BASIS    |
| PD8980       | CDC73  | cna | gain | BASIS    |
| PD9004       | CDC73  | cna | gain | BASIS    |
| PD9702       | CDC73  | cna | gain | BASIS    |
| TCGA-A2-A25B | FCGR2B | cna | gain | TCGA     |
| TCGA-AN-A0XU | FCGR2B | cna | gain | TCGA     |
| TCGA-AO-A0JL | FCGR2B | cna | gain | TCGA     |
| TCGA-BH-A0AW | FCGR2B | cna | gain | TCGA     |
| TCGA-BH-A0C0 | FCGR2B | cna | gain | TCGA     |
| TCGA-BH-A18R | FCGR2B | cna | gain | TCGA     |
| TCGA-BH-A1FU | FCGR2B | cna | gain | TCGA     |
| TCGA-C8-A12L | FCGR2B | cna | gain | TCGA     |
| TCGA-D8-A27M | FCGR2B | cna | amp  | TCGA     |
| TCGA-E2-A1L7 | FCGR2B | cna | gain | TCGA     |
| TCGA-EW-A10X | FCGR2B | cna | gain | TCGA     |
| TCGA-LL-A5YP | FCGR2B | cna | amp  | TCGA     |
| MB-0346      | FCGR2B | cna | gain | METABRIC |
| MB-2827      | FCGR2B | cna | amp  | METABRIC |
| MB-5070      | FCGR2B | cna | gain | METABRIC |
| MB-5465      | FCGR2B | cna | amp  | METABRIC |
| MB-6060      | FCGR2B | cna | gain | METABRIC |
| MB-6098      | FCGR2B | cna | amp  | METABRIC |
| MB-7032      | FCGR2B | cna | gain | METABRIC |
| MB-7038      | FCGR2B | cna | gain | METABRIC |
| MB-0420      | FCGR2B | cna | gain | METABRIC |
| PD10014      | FCGR2B | cna | gain | BASIS    |
| PD11327      | FCGR2B | cna | gain | BASIS    |
| PD13297      | FCGR2B | cna | gain | BASIS    |
| PD13299      | FCGR2B | cna | gain | BASIS    |
| PD14442      | FCGR2B | cna | gain | BASIS    |
| PD22355      | FCGR2B | cna | gain | BASIS    |
| PD23562      | FCGR2B | cna | amp  | BASIS    |
| PD23574      | FCGR2B | cna | amp  | BASIS    |
| PD24186      | FCGR2B | cna | gain | BASIS    |
| PD24206      | FCGR2B | cna | gain | BASIS    |
| PD3905       | FCGR2B | cna | gain | BASIS    |
| PD4005       | FCGR2B | cna | gain | BASIS    |
| PD4006       | FCGR2B | cna | gain | BASIS    |
| PD4107       | FCGR2B | cna | gain | BASIS    |
| PD4826       | FCGR2B | cna | gain | BASIS    |
| PD5935       | FCGR2B | cna | gain | BASIS    |
| PD5945       | FCGR2B | cna | amp  | BASIS    |
| PD5948       | FCGR2B | cna | gain | BASIS    |

|              |        |     |         |          |
|--------------|--------|-----|---------|----------|
| PD6406       | FCGR2B | cna | gain    | BASIS    |
| PD6413       | FCGR2B | cna | gain    | BASIS    |
| PD7067       | FCGR2B | cna | amp     | BASIS    |
| PD7215       | FCGR2B | cna | gain    | BASIS    |
| PD8621       | FCGR2B | cna | amp     | BASIS    |
| PD8980       | FCGR2B | cna | gain    | BASIS    |
| PD9004       | FCGR2B | cna | gain    | BASIS    |
| PD9702       | FCGR2B | cna | gain    | BASIS    |
| TCGA-A2-A25B | INSRR  | cna | gain    | TCGA     |
| TCGA-AN-A0XU | INSRR  | cna | gain    | TCGA     |
| TCGA-AO-A0JL | INSRR  | cna | gain    | TCGA     |
| TCGA-BH-A0AW | INSRR  | cna | gain    | TCGA     |
| TCGA-BH-A0C0 | INSRR  | cna | hetloss | TCGA     |
| TCGA-BH-A18R | INSRR  | cna | gain    | TCGA     |
| TCGA-BH-A1FU | INSRR  | cna | gain    | TCGA     |
| TCGA-C8-A12L | INSRR  | cna | gain    | TCGA     |
| TCGA-E2-A1L7 | INSRR  | cna | gain    | TCGA     |
| TCGA-EW-A10X | INSRR  | cna | gain    | TCGA     |
| TCGA-LL-A5YP | INSRR  | cna | amp     | TCGA     |
| MB-2827      | INSRR  | cna | amp     | METABRIC |
| MB-5070      | INSRR  | cna | gain    | METABRIC |
| MB-5465      | INSRR  | cna | gain    | METABRIC |
| MB-6060      | INSRR  | cna | gain    | METABRIC |
| MB-6098      | INSRR  | cna | amp     | METABRIC |
| MB-7032      | INSRR  | cna | gain    | METABRIC |
| MB-7038      | INSRR  | cna | gain    | METABRIC |
| PD10014      | INSRR  | cna | gain    | BASIS    |
| PD11327      | INSRR  | cna | gain    | BASIS    |
| PD13297      | INSRR  | cna | gain    | BASIS    |
| PD13299      | INSRR  | cna | gain    | BASIS    |
| PD14442      | INSRR  | cna | gain    | BASIS    |
| PD22355      | INSRR  | cna | gain    | BASIS    |
| PD23562      | INSRR  | cna | amp     | BASIS    |
| PD23574      | INSRR  | cna | amp     | BASIS    |
| PD24186      | INSRR  | cna | gain    | BASIS    |
| PD24206      | INSRR  | cna | gain    | BASIS    |
| PD24337      | INSRR  | cna | gain    | BASIS    |
| PD3890       | INSRR  | cna | gain    | BASIS    |
| PD3905       | INSRR  | cna | gain    | BASIS    |
| PD4005       | INSRR  | cna | gain    | BASIS    |
| PD4006       | INSRR  | cna | amp     | BASIS    |
| PD4107       | INSRR  | cna | gain    | BASIS    |
| PD4826       | INSRR  | cna | gain    | BASIS    |
| PD5930       | INSRR  | cna | gain    | BASIS    |
| PD5935       | INSRR  | cna | gain    | BASIS    |
| PD5945       | INSRR  | cna | amp     | BASIS    |
| PD5948       | INSRR  | cna | gain    | BASIS    |

|              |       |     |         |          |
|--------------|-------|-----|---------|----------|
| PD6406       | INSRR | cna | gain    | BASIS    |
| PD6413       | INSRR | cna | gain    | BASIS    |
| PD7067       | INSRR | cna | gain    | BASIS    |
| PD7215       | INSRR | cna | gain    | BASIS    |
| PD8621       | INSRR | cna | amp     | BASIS    |
| PD8980       | INSRR | cna | gain    | BASIS    |
| PD9004       | INSRR | cna | amp     | BASIS    |
| PD9702       | INSRR | cna | gain    | BASIS    |
| TCGA-A2-A25B | LGR6  | cna | amp     | TCGA     |
| TCGA-AN-A0XU | LGR6  | cna | hetloss | TCGA     |
| TCGA-AO-A0JL | LGR6  | cna | gain    | TCGA     |
| TCGA-BH-A0AW | LGR6  | cna | gain    | TCGA     |
| TCGA-BH-A0C0 | LGR6  | cna | gain    | TCGA     |
| TCGA-BH-A18R | LGR6  | cna | gain    | TCGA     |
| TCGA-BH-A1FU | LGR6  | cna | gain    | TCGA     |
| TCGA-C8-A12L | LGR6  | cna | gain    | TCGA     |
| TCGA-E2-A1L7 | LGR6  | cna | gain    | TCGA     |
| TCGA-E9-A1NC | LGR6  | cna | gain    | TCGA     |
| TCGA-EW-A10X | LGR6  | cna | gain    | TCGA     |
| TCGA-LL-A5YP | LGR6  | cna | gain    | TCGA     |
| MB-0346      | LGR6  | cna | gain    | METABRIC |
| MB-5107      | LGR6  | cna | gain    | METABRIC |
| MB-5465      | LGR6  | cna | gain    | METABRIC |
| MB-6060      | LGR6  | cna | gain    | METABRIC |
| MB-6098      | LGR6  | cna | gain    | METABRIC |
| MB-7032      | LGR6  | cna | gain    | METABRIC |
| MB-7048      | LGR6  | cna | gain    | METABRIC |
| PD10014      | LGR6  | cna | gain    | BASIS    |
| PD13296      | LGR6  | cna | hetloss | BASIS    |
| PD13297      | LGR6  | cna | gain    | BASIS    |
| PD13299      | LGR6  | cna | gain    | BASIS    |
| PD14442      | LGR6  | cna | gain    | BASIS    |
| PD23562      | LGR6  | cna | gain    | BASIS    |
| PD23574      | LGR6  | cna | gain    | BASIS    |
| PD24186      | LGR6  | cna | amp     | BASIS    |
| PD24206      | LGR6  | cna | gain    | BASIS    |
| PD24337      | LGR6  | cna | gain    | BASIS    |
| PD3890       | LGR6  | cna | gain    | BASIS    |
| PD3905       | LGR6  | cna | gain    | BASIS    |
| PD4005       | LGR6  | cna | gain    | BASIS    |
| PD4006       | LGR6  | cna | amp     | BASIS    |
| PD4107       | LGR6  | cna | gain    | BASIS    |
| PD4826       | LGR6  | cna | gain    | BASIS    |
| PD5935       | LGR6  | cna | gain    | BASIS    |
| PD5945       | LGR6  | cna | amp     | BASIS    |
| PD5948       | LGR6  | cna | gain    | BASIS    |
| PD6406       | LGR6  | cna | gain    | BASIS    |

|              |       |     |         |          |
|--------------|-------|-----|---------|----------|
| PD6413       | LGR6  | cna | gain    | BASIS    |
| PD6731       | LGR6  | cna | hetloss | BASIS    |
| PD7067       | LGR6  | cna | gain    | BASIS    |
| PD7215       | LGR6  | cna | amp     | BASIS    |
| PD8621       | LGR6  | cna | gain    | BASIS    |
| PD8980       | LGR6  | cna | amp     | BASIS    |
| PD9004       | LGR6  | cna | gain    | BASIS    |
| PD9702       | LGR6  | cna | amp     | BASIS    |
| TCGA-A2-A25B | NTRK1 | cna | gain    | TCGA     |
| TCGA-AN-A0XU | NTRK1 | cna | gain    | TCGA     |
| TCGA-AO-A0JL | NTRK1 | cna | gain    | TCGA     |
| TCGA-BH-A0AW | NTRK1 | cna | gain    | TCGA     |
| TCGA-BH-A0C0 | NTRK1 | cna | hetloss | TCGA     |
| TCGA-BH-A18R | NTRK1 | cna | gain    | TCGA     |
| TCGA-BH-A1FU | NTRK1 | cna | gain    | TCGA     |
| TCGA-C8-A12L | NTRK1 | cna | gain    | TCGA     |
| TCGA-E2-A1L7 | NTRK1 | cna | gain    | TCGA     |
| TCGA-EW-A10X | NTRK1 | cna | gain    | TCGA     |
| TCGA-LL-A5YP | NTRK1 | cna | amp     | TCGA     |
| MB-2827      | NTRK1 | cna | amp     | METABRIC |
| MB-5070      | NTRK1 | cna | gain    | METABRIC |
| MB-5465      | NTRK1 | cna | gain    | METABRIC |
| MB-6060      | NTRK1 | cna | gain    | METABRIC |
| MB-6098      | NTRK1 | cna | amp     | METABRIC |
| MB-7032      | NTRK1 | cna | gain    | METABRIC |
| MB-7038      | NTRK1 | cna | gain    | METABRIC |
| PD10014      | NTRK1 | cna | gain    | BASIS    |
| PD11327      | NTRK1 | cna | gain    | BASIS    |
| PD13297      | NTRK1 | cna | gain    | BASIS    |
| PD13299      | NTRK1 | cna | gain    | BASIS    |
| PD14442      | NTRK1 | cna | gain    | BASIS    |
| PD22355      | NTRK1 | cna | gain    | BASIS    |
| PD23562      | NTRK1 | cna | amp     | BASIS    |
| PD23574      | NTRK1 | cna | amp     | BASIS    |
| PD24186      | NTRK1 | cna | gain    | BASIS    |
| PD24206      | NTRK1 | cna | gain    | BASIS    |
| PD24337      | NTRK1 | cna | gain    | BASIS    |
| PD3890       | NTRK1 | cna | gain    | BASIS    |
| PD3905       | NTRK1 | cna | gain    | BASIS    |
| PD4005       | NTRK1 | cna | gain    | BASIS    |
| PD4006       | NTRK1 | cna | amp     | BASIS    |
| PD4107       | NTRK1 | cna | gain    | BASIS    |
| PD4826       | NTRK1 | cna | gain    | BASIS    |
| PD5930       | NTRK1 | cna | gain    | BASIS    |
| PD5935       | NTRK1 | cna | gain    | BASIS    |
| PD5945       | NTRK1 | cna | amp     | BASIS    |
| PD5948       | NTRK1 | cna | gain    | BASIS    |

|              |       |     |         |          |
|--------------|-------|-----|---------|----------|
| PD6406       | NTRK1 | cna | gain    | BASIS    |
| PD6413       | NTRK1 | cna | gain    | BASIS    |
| PD7067       | NTRK1 | cna | gain    | BASIS    |
| PD7215       | NTRK1 | cna | gain    | BASIS    |
| PD8621       | NTRK1 | cna | amp     | BASIS    |
| PD8980       | NTRK1 | cna | gain    | BASIS    |
| PD9004       | NTRK1 | cna | amp     | BASIS    |
| PD9702       | NTRK1 | cna | gain    | BASIS    |
| TCGA-A2-A25B | PBX1  | cna | gain    | TCGA     |
| TCGA-AN-A0XU | PBX1  | cna | gain    | TCGA     |
| TCGA-AO-A0JL | PBX1  | cna | gain    | TCGA     |
| TCGA-BH-A0AW | PBX1  | cna | gain    | TCGA     |
| TCGA-BH-A0C0 | PBX1  | cna | gain    | TCGA     |
| TCGA-BH-A18R | PBX1  | cna | gain    | TCGA     |
| TCGA-BH-A1FU | PBX1  | cna | gain    | TCGA     |
| TCGA-C8-A12L | PBX1  | cna | gain    | TCGA     |
| TCGA-E2-A1L7 | PBX1  | cna | gain    | TCGA     |
| TCGA-EW-A10X | PBX1  | cna | gain    | TCGA     |
| TCGA-LL-A5YP | PBX1  | cna | amp     | TCGA     |
| MB-0346      | PBX1  | cna | gain    | METABRIC |
| MB-5070      | PBX1  | cna | gain    | METABRIC |
| MB-5465      | PBX1  | cna | amp     | METABRIC |
| MB-6060      | PBX1  | cna | gain    | METABRIC |
| MB-6098      | PBX1  | cna | amp     | METABRIC |
| MB-7032      | PBX1  | cna | gain    | METABRIC |
| MB-7038      | PBX1  | cna | gain    | METABRIC |
| MB-0420      | PBX1  | cna | gain    | METABRIC |
| MTS-T0064    | PBX1  | cna | gain    | METABRIC |
| PD10014      | PBX1  | cna | gain    | BASIS    |
| PD11327      | PBX1  | cna | amp     | BASIS    |
| PD13297      | PBX1  | cna | gain    | BASIS    |
| PD13299      | PBX1  | cna | gain    | BASIS    |
| PD14442      | PBX1  | cna | gain    | BASIS    |
| PD22355      | PBX1  | cna | gain    | BASIS    |
| PD23562      | PBX1  | cna | amp     | BASIS    |
| PD23574      | PBX1  | cna | gain    | BASIS    |
| PD24186      | PBX1  | cna | gain    | BASIS    |
| PD24206      | PBX1  | cna | gain    | BASIS    |
| PD24337      | PBX1  | cna | hetloss | BASIS    |
| PD3905       | PBX1  | cna | gain    | BASIS    |
| PD4005       | PBX1  | cna | gain    | BASIS    |
| PD4006       | PBX1  | cna | gain    | BASIS    |
| PD4107       | PBX1  | cna | gain    | BASIS    |
| PD4826       | PBX1  | cna | gain    | BASIS    |
| PD5935       | PBX1  | cna | gain    | BASIS    |
| PD5945       | PBX1  | cna | amp     | BASIS    |
| PD5948       | PBX1  | cna | gain    | BASIS    |

|                   |         |     |         |            |
|-------------------|---------|-----|---------|------------|
| PD6406            | PBX1    | cna | gain    | BASIS      |
| PD6413            | PBX1    | cna | gain    | BASIS      |
| PD7067            | PBX1    | cna | amp     | BASIS      |
| PD7215            | PBX1    | cna | gain    | BASIS      |
| PD8621            | PBX1    | cna | gain    | BASIS      |
| PD8980            | PBX1    | cna | gain    | BASIS      |
| PD9004            | PBX1    | cna | gain    | BASIS      |
| PD9702            | PBX1    | cna | gain    | BASIS      |
| TCGA-A2-A25B      | PRKAR1A | cna | gain    | TCGA       |
| TCGA-AN-A0XU      | PRKAR1A | cna | gain    | TCGA       |
| TCGA-AO-A0JL      | PRKAR1A | cna | hetloss | TCGA       |
| TCGA-BH-A0AW      | PRKAR1A | cna | amp     | TCGA       |
| TCGA-BH-A0C0      | PRKAR1A | cna | gain    | TCGA       |
| TCGA-BH-A18R      | PRKAR1A | cna | amp     | TCGA       |
| TCGA-C8-A12L      | PRKAR1A | cna | gain    | TCGA       |
| TCGA-D8-A27M      | PRKAR1A | cna | gain    | TCGA       |
| TCGA-EW-A10X      | PRKAR1A | cna | amp     | TCGA       |
| TCGA-LL-A5YP      | PRKAR1A | cna | amp     | TCGA       |
| MB-2827           | PRKAR1A | cna | hetloss | METABRIC   |
| MB-5070           | PRKAR1A | cna | gain    | METABRIC   |
| MB-5107           | PRKAR1A | cna | amp     | METABRIC   |
| MB-6098           | PRKAR1A | cna | gain    | METABRIC   |
| MB-6271           | PRKAR1A | cna | hetloss | METABRIC   |
| MB-7048           | PRKAR1A | cna | amp     | METABRIC   |
| MTS-T0064         | PRKAR1A | cna | gain    | METABRIC   |
| P-0002023-T01-IM3 | PRKAR1A | cna | amp     | MSK-IMPACT |
| P-0002858-T01-IM3 | PRKAR1A | cna | amp     | MSK-IMPACT |
| PD11327           | PRKAR1A | cna | amp     | BASIS      |
| PD11742           | PRKAR1A | cna | gain    | BASIS      |
| PD13297           | PRKAR1A | cna | gain    | BASIS      |
| PD23561           | PRKAR1A | cna | gain    | BASIS      |
| PD23562           | PRKAR1A | cna | gain    | BASIS      |
| PD23574           | PRKAR1A | cna | gain    | BASIS      |
| PD24186           | PRKAR1A | cna | gain    | BASIS      |
| PD24202           | PRKAR1A | cna | gain    | BASIS      |
| PD24206           | PRKAR1A | cna | hetloss | BASIS      |
| PD24337           | PRKAR1A | cna | hetloss | BASIS      |
| PD3890            | PRKAR1A | cna | gain    | BASIS      |
| PD3905            | PRKAR1A | cna | gain    | BASIS      |
| PD4006            | PRKAR1A | cna | gain    | BASIS      |
| PD4107            | PRKAR1A | cna | gain    | BASIS      |
| PD4826            | PRKAR1A | cna | amp     | BASIS      |
| PD4967            | PRKAR1A | cna | hetloss | BASIS      |
| PD5930            | PRKAR1A | cna | gain    | BASIS      |
| PD5935            | PRKAR1A | cna | gain    | BASIS      |
| PD5945            | PRKAR1A | cna | amp     | BASIS      |
| PD5948            | PRKAR1A | cna | gain    | BASIS      |

|              |         |     |         |          |
|--------------|---------|-----|---------|----------|
| PD6731       | PRKAR1A | cna | hetloss | BASIS    |
| PD7067       | PRKAR1A | cna | gain    | BASIS    |
| PD7215       | PRKAR1A | cna | gain    | BASIS    |
| PD8621       | PRKAR1A | cna | gain    | BASIS    |
| PD8980       | PRKAR1A | cna | gain    | BASIS    |
| PD9004       | PRKAR1A | cna | gain    | BASIS    |
| PD9585       | PRKAR1A | cna | gain    | BASIS    |
| PD9702       | PRKAR1A | cna | gain    | BASIS    |
| TCGA-A2-A25B | RPTOR   | cna | gain    | TCGA     |
| TCGA-AN-A0XU | RPTOR   | cna | amp     | TCGA     |
| TCGA-AO-A0JL | RPTOR   | cna | homdel  | TCGA     |
| TCGA-BH-A0AW | RPTOR   | cna | amp     | TCGA     |
| TCGA-BH-A0C0 | RPTOR   | cna | gain    | TCGA     |
| TCGA-BH-A18R | RPTOR   | cna | amp     | TCGA     |
| TCGA-C8-A12L | RPTOR   | cna | gain    | TCGA     |
| TCGA-D8-A27M | RPTOR   | cna | gain    | TCGA     |
| TCGA-E2-A1L7 | RPTOR   | cna | gain    | TCGA     |
| TCGA-EW-A10X | RPTOR   | cna | gain    | TCGA     |
| TCGA-LL-A5YP | RPTOR   | cna | amp     | TCGA     |
| MB-0346      | RPTOR   | cna | gain    | METABRIC |
| MB-2827      | RPTOR   | cna | hetloss | METABRIC |
| MB-5070      | RPTOR   | cna | amp     | METABRIC |
| MB-5107      | RPTOR   | cna | amp     | METABRIC |
| MB-5465      | RPTOR   | cna | gain    | METABRIC |
| MB-6060      | RPTOR   | cna | hetloss | METABRIC |
| MB-6098      | RPTOR   | cna | gain    | METABRIC |
| MB-6271      | RPTOR   | cna | hetloss | METABRIC |
| MTS-T0064    | RPTOR   | cna | gain    | METABRIC |
| PD10014      | RPTOR   | cna | gain    | BASIS    |
| PD11327      | RPTOR   | cna | amp     | BASIS    |
| PD22355      | RPTOR   | cna | hetloss | BASIS    |
| PD23561      | RPTOR   | cna | hetloss | BASIS    |
| PD23574      | RPTOR   | cna | amp     | BASIS    |
| PD24186      | RPTOR   | cna | amp     | BASIS    |
| PD24202      | RPTOR   | cna | gain    | BASIS    |
| PD24206      | RPTOR   | cna | gain    | BASIS    |
| PD24337      | RPTOR   | cna | hetloss | BASIS    |
| PD3890       | RPTOR   | cna | gain    | BASIS    |
| PD3905       | RPTOR   | cna | gain    | BASIS    |
| PD4006       | RPTOR   | cna | gain    | BASIS    |
| PD4107       | RPTOR   | cna | gain    | BASIS    |
| PD4826       | RPTOR   | cna | amp     | BASIS    |
| PD4967       | RPTOR   | cna | hetloss | BASIS    |
| PD5930       | RPTOR   | cna | gain    | BASIS    |
| PD5935       | RPTOR   | cna | gain    | BASIS    |
| PD5945       | RPTOR   | cna | amp     | BASIS    |
| PD5948       | RPTOR   | cna | gain    | BASIS    |

|                   |       |     |         |            |
|-------------------|-------|-----|---------|------------|
| PD6413            | RPTOR | cna | hetloss | BASIS      |
| PD6731            | RPTOR | cna | hetloss | BASIS      |
| PD7067            | RPTOR | cna | gain    | BASIS      |
| PD7215            | RPTOR | cna | gain    | BASIS      |
| PD8621            | RPTOR | cna | gain    | BASIS      |
| PD9004            | RPTOR | cna | gain    | BASIS      |
| PD9585            | RPTOR | cna | gain    | BASIS      |
| PD9702            | RPTOR | cna | gain    | BASIS      |
| TCGA-A2-A25B      | SPOP  | cna | amp     | TCGA       |
| TCGA-AN-A0XU      | SPOP  | cna | hetloss | TCGA       |
| TCGA-AO-A0JL      | SPOP  | cna | hetloss | TCGA       |
| TCGA-BH-A0AW      | SPOP  | cna | amp     | TCGA       |
| TCGA-BH-A0C0      | SPOP  | cna | gain    | TCGA       |
| TCGA-BH-A18R      | SPOP  | cna | amp     | TCGA       |
| TCGA-BH-A1FU      | SPOP  | cna | homdel  | TCGA       |
| TCGA-C8-A12L      | SPOP  | cna | amp     | TCGA       |
| TCGA-D8-A27M      | SPOP  | cna | hetloss | TCGA       |
| TCGA-E9-A1NC      | SPOP  | cna | hetloss | TCGA       |
| TCGA-EW-A10X      | SPOP  | cna | amp     | TCGA       |
| MB-0346           | SPOP  | cna | gain    | METABRIC   |
| MB-2827           | SPOP  | cna | hetloss | METABRIC   |
| MB-5070           | SPOP  | cna | hetloss | METABRIC   |
| MB-5107           | SPOP  | cna | amp     | METABRIC   |
| MB-6060           | SPOP  | cna | amp     | METABRIC   |
| MB-6098           | SPOP  | cna | hetloss | METABRIC   |
| MB-6271           | SPOP  | cna | hetloss | METABRIC   |
| MB-7048           | SPOP  | cna | gain    | METABRIC   |
| P-0002023-T01-IM3 | SPOP  | cna | amp     | MSK-IMPACT |
| P-0002858-T01-IM3 | SPOP  | cna | amp     | MSK-IMPACT |
| PD11327           | SPOP  | cna | gain    | BASIS      |
| PD11742           | SPOP  | cna | gain    | BASIS      |
| PD13296           | SPOP  | cna | gain    | BASIS      |
| PD13297           | SPOP  | cna | hetloss | BASIS      |
| PD13299           | SPOP  | cna | gain    | BASIS      |
| PD13771           | SPOP  | cna | gain    | BASIS      |
| PD23561           | SPOP  | cna | amp     | BASIS      |
| PD23562           | SPOP  | cna | gain    | BASIS      |
| PD23574           | SPOP  | cna | gain    | BASIS      |
| PD24186           | SPOP  | cna | gain    | BASIS      |
| PD24206           | SPOP  | cna | hetloss | BASIS      |
| PD24337           | SPOP  | cna | hetloss | BASIS      |
| PD3890            | SPOP  | cna | hetloss | BASIS      |
| PD3905            | SPOP  | cna | gain    | BASIS      |
| PD4005            | SPOP  | cna | gain    | BASIS      |
| PD4006            | SPOP  | cna | amp     | BASIS      |
| PD4826            | SPOP  | cna | gain    | BASIS      |
| PD4967            | SPOP  | cna | hetloss | BASIS      |



|              |      |     |         |          |
|--------------|------|-----|---------|----------|
| PD5945       | SPOP | cna | amp     | BASIS    |
| PD5948       | SPOP | cna | gain    | BASIS    |
| PD6406       | SPOP | cna | hetloss | BASIS    |
| PD6731       | SPOP | cna | hetloss | BASIS    |
| PD7067       | SPOP | cna | gain    | BASIS    |
| PD7215       | SPOP | cna | gain    | BASIS    |
| PD9004       | SPOP | cna | gain    | BASIS    |
| PD9702       | SPOP | cna | gain    | BASIS    |
| TCGA-A2-A25B | TPR  | cna | amp     | TCGA     |
| TCGA-AN-A0XU | TPR  | cna | hetloss | TCGA     |
| TCGA-AO-A0JL | TPR  | cna | gain    | TCGA     |
| TCGA-BH-A0AW | TPR  | cna | gain    | TCGA     |
| TCGA-BH-A0C0 | TPR  | cna | gain    | TCGA     |
| TCGA-BH-A18R | TPR  | cna | gain    | TCGA     |
| TCGA-BH-A1FU | TPR  | cna | gain    | TCGA     |
| TCGA-C8-A12L | TPR  | cna | amp     | TCGA     |
| TCGA-E2-A1L7 | TPR  | cna | gain    | TCGA     |
| TCGA-E9-A1NC | TPR  | cna | hetloss | TCGA     |
| TCGA-EW-A10X | TPR  | cna | gain    | TCGA     |
| TCGA-LL-A5YP | TPR  | cna | amp     | TCGA     |
| MB-0346      | TPR  | cna | gain    | METABRIC |
| MB-5107      | TPR  | cna | gain    | METABRIC |
| MB-5465      | TPR  | cna | amp     | METABRIC |
| MB-6098      | TPR  | cna | gain    | METABRIC |
| MB-7032      | TPR  | cna | gain    | METABRIC |
| MB-7038      | TPR  | cna | amp     | METABRIC |
| MB-7048      | TPR  | cna | gain    | METABRIC |
| PD10014      | TPR  | cna | gain    | BASIS    |
| PD11327      | TPR  | cna | gain    | BASIS    |
| PD13297      | TPR  | cna | gain    | BASIS    |
| PD13299      | TPR  | cna | gain    | BASIS    |
| PD14442      | TPR  | cna | gain    | BASIS    |
| PD22355      | TPR  | cna | gain    | BASIS    |
| PD23562      | TPR  | cna | gain    | BASIS    |
| PD23574      | TPR  | cna | gain    | BASIS    |
| PD24186      | TPR  | cna | amp     | BASIS    |
| PD24206      | TPR  | cna | gain    | BASIS    |
| PD24337      | TPR  | cna | gain    | BASIS    |
| PD3890       | TPR  | cna | gain    | BASIS    |
| PD3905       | TPR  | cna | gain    | BASIS    |
| PD4005       | TPR  | cna | gain    | BASIS    |
| PD4006       | TPR  | cna | gain    | BASIS    |
| PD4107       | TPR  | cna | gain    | BASIS    |
| PD4826       | TPR  | cna | gain    | BASIS    |
| PD5935       | TPR  | cna | gain    | BASIS    |
| PD5945       | TPR  | cna | amp     | BASIS    |
| PD5948       | TPR  | cna | gain    | BASIS    |

|              |      |     |         |          |
|--------------|------|-----|---------|----------|
| PD6406       | TPR  | cna | gain    | BASIS    |
| PD6413       | TPR  | cna | gain    | BASIS    |
| PD7067       | TPR  | cna | amp     | BASIS    |
| PD7215       | TPR  | cna | amp     | BASIS    |
| PD8621       | TPR  | cna | gain    | BASIS    |
| PD8980       | TPR  | cna | gain    | BASIS    |
| PD9004       | TPR  | cna | gain    | BASIS    |
| PD9702       | TPR  | cna | gain    | BASIS    |
| TCGA-A2-A25B | ABL2 | cna | amp     | TCGA     |
| TCGA-AN-A0XU | ABL2 | cna | gain    | TCGA     |
| TCGA-AO-A0JL | ABL2 | cna | gain    | TCGA     |
| TCGA-BH-A0AW | ABL2 | cna | gain    | TCGA     |
| TCGA-BH-A0C0 | ABL2 | cna | gain    | TCGA     |
| TCGA-BH-A18R | ABL2 | cna | gain    | TCGA     |
| TCGA-BH-A1FU | ABL2 | cna | gain    | TCGA     |
| TCGA-C8-A12L | ABL2 | cna | gain    | TCGA     |
| TCGA-E2-A1L7 | ABL2 | cna | gain    | TCGA     |
| TCGA-E9-A1NC | ABL2 | cna | hetloss | TCGA     |
| TCGA-EW-A10X | ABL2 | cna | gain    | TCGA     |
| TCGA-LL-A5YP | ABL2 | cna | amp     | TCGA     |
| MB-0346      | ABL2 | cna | gain    | METABRIC |
| MB-2827      | ABL2 | cna | hetloss | METABRIC |
| MB-5465      | ABL2 | cna | gain    | METABRIC |
| MB-6098      | ABL2 | cna | gain    | METABRIC |
| MB-7032      | ABL2 | cna | gain    | METABRIC |
| MB-7048      | ABL2 | cna | gain    | METABRIC |
| PD10014      | ABL2 | cna | gain    | BASIS    |
| PD13297      | ABL2 | cna | gain    | BASIS    |
| PD13299      | ABL2 | cna | gain    | BASIS    |
| PD13771      | ABL2 | cna | hetloss | BASIS    |
| PD14442      | ABL2 | cna | gain    | BASIS    |
| PD22355      | ABL2 | cna | gain    | BASIS    |
| PD23562      | ABL2 | cna | gain    | BASIS    |
| PD23574      | ABL2 | cna | gain    | BASIS    |
| PD24186      | ABL2 | cna | amp     | BASIS    |
| PD24206      | ABL2 | cna | hetloss | BASIS    |
| PD24337      | ABL2 | cna | gain    | BASIS    |
| PD3890       | ABL2 | cna | gain    | BASIS    |
| PD3905       | ABL2 | cna | gain    | BASIS    |
| PD4005       | ABL2 | cna | gain    | BASIS    |
| PD4006       | ABL2 | cna | gain    | BASIS    |
| PD4107       | ABL2 | cna | gain    | BASIS    |
| PD4826       | ABL2 | cna | gain    | BASIS    |
| PD5935       | ABL2 | cna | gain    | BASIS    |
| PD5945       | ABL2 | cna | amp     | BASIS    |
| PD5948       | ABL2 | cna | gain    | BASIS    |
| PD6406       | ABL2 | cna | gain    | BASIS    |

|              |         |     |         |          |
|--------------|---------|-----|---------|----------|
| PD6413       | ABL2    | cna | gain    | BASIS    |
| PD7067       | ABL2    | cna | amp     | BASIS    |
| PD7215       | ABL2    | cna | amp     | BASIS    |
| PD8621       | ABL2    | cna | gain    | BASIS    |
| PD8980       | ABL2    | cna | gain    | BASIS    |
| PD9004       | ABL2    | cna | gain    | BASIS    |
| PD9702       | ABL2    | cna | gain    | BASIS    |
| TCGA-A2-A25B | ASPSCR1 | cna | gain    | TCGA     |
| TCGA-AN-A0XU | ASPSCR1 | cna | amp     | TCGA     |
| TCGA-AO-A0JL | ASPSCR1 | cna | hetloss | TCGA     |
| TCGA-BH-A0AW | ASPSCR1 | cna | amp     | TCGA     |
| TCGA-BH-A0C0 | ASPSCR1 | cna | amp     | TCGA     |
| TCGA-BH-A18R | ASPSCR1 | cna | homdel  | TCGA     |
| TCGA-C8-A12L | ASPSCR1 | cna | gain    | TCGA     |
| TCGA-D8-A27M | ASPSCR1 | cna | gain    | TCGA     |
| TCGA-E2-A1L7 | ASPSCR1 | cna | gain    | TCGA     |
| TCGA-EW-A10X | ASPSCR1 | cna | gain    | TCGA     |
| TCGA-LL-A5YP | ASPSCR1 | cna | amp     | TCGA     |
| MB-0346      | ASPSCR1 | cna | gain    | METABRIC |
| MB-2827      | ASPSCR1 | cna | hetloss | METABRIC |
| MB-5070      | ASPSCR1 | cna | gain    | METABRIC |
| MB-5107      | ASPSCR1 | cna | amp     | METABRIC |
| MB-5465      | ASPSCR1 | cna | gain    | METABRIC |
| MB-6060      | ASPSCR1 | cna | hetloss | METABRIC |
| MB-6098      | ASPSCR1 | cna | gain    | METABRIC |
| MB-6271      | ASPSCR1 | cna | hetloss | METABRIC |
| MTS-T0064    | ASPSCR1 | cna | gain    | METABRIC |
| PD10014      | ASPSCR1 | cna | gain    | BASIS    |
| PD11327      | ASPSCR1 | cna | amp     | BASIS    |
| PD22355      | ASPSCR1 | cna | hetloss | BASIS    |
| PD23561      | ASPSCR1 | cna | hetloss | BASIS    |
| PD23574      | ASPSCR1 | cna | amp     | BASIS    |
| PD24186      | ASPSCR1 | cna | amp     | BASIS    |
| PD24202      | ASPSCR1 | cna | gain    | BASIS    |
| PD24337      | ASPSCR1 | cna | hetloss | BASIS    |
| PD3890       | ASPSCR1 | cna | gain    | BASIS    |
| PD3905       | ASPSCR1 | cna | gain    | BASIS    |
| PD4006       | ASPSCR1 | cna | gain    | BASIS    |
| PD4107       | ASPSCR1 | cna | gain    | BASIS    |
| PD4826       | ASPSCR1 | cna | amp     | BASIS    |
| PD4967       | ASPSCR1 | cna | hetloss | BASIS    |
| PD5930       | ASPSCR1 | cna | gain    | BASIS    |
| PD5935       | ASPSCR1 | cna | gain    | BASIS    |
| PD5945       | ASPSCR1 | cna | amp     | BASIS    |
| PD5948       | ASPSCR1 | cna | gain    | BASIS    |
| PD6413       | ASPSCR1 | cna | hetloss | BASIS    |
| PD6731       | ASPSCR1 | cna | hetloss | BASIS    |

|              |         |     |         |          |
|--------------|---------|-----|---------|----------|
| PD7067       | ASPSCR1 | cna | gain    | BASIS    |
| PD7215       | ASPSCR1 | cna | gain    | BASIS    |
| PD8621       | ASPSCR1 | cna | gain    | BASIS    |
| PD9004       | ASPSCR1 | cna | gain    | BASIS    |
| PD9585       | ASPSCR1 | cna | gain    | BASIS    |
| PD9702       | ASPSCR1 | cna | gain    | BASIS    |
| TCGA-A2-A25B | CANT1   | cna | amp     | TCGA     |
| TCGA-AN-A0XU | CANT1   | cna | amp     | TCGA     |
| TCGA-AO-A0JL | CANT1   | cna | hetloss | TCGA     |
| TCGA-BH-A0AW | CANT1   | cna | amp     | TCGA     |
| TCGA-BH-A0C0 | CANT1   | cna | gain    | TCGA     |
| TCGA-BH-A18R | CANT1   | cna | amp     | TCGA     |
| TCGA-C8-A12L | CANT1   | cna | gain    | TCGA     |
| TCGA-D8-A27M | CANT1   | cna | gain    | TCGA     |
| TCGA-E2-A1L7 | CANT1   | cna | gain    | TCGA     |
| TCGA-EW-A10X | CANT1   | cna | amp     | TCGA     |
| TCGA-LL-A5YP | CANT1   | cna | amp     | TCGA     |
| MB-2827      | CANT1   | cna | hetloss | METABRIC |
| MB-5070      | CANT1   | cna | amp     | METABRIC |
| MB-5107      | CANT1   | cna | amp     | METABRIC |
| MB-5465      | CANT1   | cna | gain    | METABRIC |
| MB-6098      | CANT1   | cna | gain    | METABRIC |
| MB-6271      | CANT1   | cna | hetloss | METABRIC |
| MB-7048      | CANT1   | cna | gain    | METABRIC |
| MTS-T0064    | CANT1   | cna | gain    | METABRIC |
| PD10014      | CANT1   | cna | gain    | BASIS    |
| PD11327      | CANT1   | cna | amp     | BASIS    |
| PD22355      | CANT1   | cna | hetloss | BASIS    |
| PD23561      | CANT1   | cna | hetloss | BASIS    |
| PD23574      | CANT1   | cna | amp     | BASIS    |
| PD24186      | CANT1   | cna | amp     | BASIS    |
| PD24202      | CANT1   | cna | gain    | BASIS    |
| PD24206      | CANT1   | cna | hetloss | BASIS    |
| PD24337      | CANT1   | cna | gain    | BASIS    |
| PD3890       | CANT1   | cna | gain    | BASIS    |
| PD3905       | CANT1   | cna | gain    | BASIS    |
| PD4006       | CANT1   | cna | gain    | BASIS    |
| PD4107       | CANT1   | cna | gain    | BASIS    |
| PD4826       | CANT1   | cna | amp     | BASIS    |
| PD4967       | CANT1   | cna | hetloss | BASIS    |
| PD5930       | CANT1   | cna | gain    | BASIS    |
| PD5935       | CANT1   | cna | gain    | BASIS    |
| PD5945       | CANT1   | cna | amp     | BASIS    |
| PD5948       | CANT1   | cna | gain    | BASIS    |
| PD6413       | CANT1   | cna | hetloss | BASIS    |
| PD6731       | CANT1   | cna | hetloss | BASIS    |
| PD7067       | CANT1   | cna | gain    | BASIS    |

|                   |       |     |         |            |
|-------------------|-------|-----|---------|------------|
| PD7215            | CANT1 | cna | gain    | BASIS      |
| PD8621            | CANT1 | cna | gain    | BASIS      |
| PD9004            | CANT1 | cna | gain    | BASIS      |
| PD9585            | CANT1 | cna | gain    | BASIS      |
| PD9702            | CANT1 | cna | gain    | BASIS      |
| TCGA-A2-A25B      | CDK12 | cna | hetloss | TCGA       |
| TCGA-AN-A0XU      | CDK12 | cna | gain    | TCGA       |
| TCGA-AO-A0JL      | CDK12 | cna | amp     | TCGA       |
| TCGA-BH-A0AW      | CDK12 | cna | amp     | TCGA       |
| TCGA-BH-A0C0      | CDK12 | cna | gain    | TCGA       |
| TCGA-BH-A18R      | CDK12 | cna | amp     | TCGA       |
| TCGA-BH-A1FU      | CDK12 | cna | amp     | TCGA       |
| TCGA-C8-A12L      | CDK12 | cna | amp     | TCGA       |
| TCGA-D8-A27M      | CDK12 | cna | hetloss | TCGA       |
| TCGA-E2-A1L7      | CDK12 | cna | hetloss | TCGA       |
| TCGA-E9-A1NC      | CDK12 | cna | hetloss | TCGA       |
| MB-0346           | CDK12 | cna | hetloss | METABRIC   |
| MB-2827           | CDK12 | cna | hetloss | METABRIC   |
| MB-5070           | CDK12 | cna | hetloss | METABRIC   |
| MB-5107           | CDK12 | cna | gain    | METABRIC   |
| MB-5465           | CDK12 | cna | hetloss | METABRIC   |
| MB-6060           | CDK12 | cna | amp     | METABRIC   |
| MB-6098           | CDK12 | cna | hetloss | METABRIC   |
| MB-6271           | CDK12 | cna | hetloss | METABRIC   |
| MB-7038           | CDK12 | cna | hetloss | METABRIC   |
| MB-7048           | CDK12 | cna | gain    | METABRIC   |
| MB-0420           | CDK12 | cna | hetloss | METABRIC   |
| P-0002023-T01-IM3 | CDK12 | cna | amp     | MSK-IMPACT |
| P-0002858-T01-IM3 | CDK12 | cna | amp     | MSK-IMPACT |
| P-0009557-T01-IM5 | CDK12 | cna | homdel  | MSK-IMPACT |
| PD13297           | CDK12 | cna | hetloss | BASIS      |
| PD13299           | CDK12 | cna | gain    | BASIS      |
| PD23561           | CDK12 | cna | amp     | BASIS      |
| PD23562           | CDK12 | cna | gain    | BASIS      |
| PD24186           | CDK12 | cna | gain    | BASIS      |
| PD24206           | CDK12 | cna | hetloss | BASIS      |
| PD24337           | CDK12 | cna | hetloss | BASIS      |
| PD3890            | CDK12 | cna | hetloss | BASIS      |
| PD3905            | CDK12 | cna | gain    | BASIS      |
| PD4005            | CDK12 | cna | hetloss | BASIS      |
| PD4826            | CDK12 | cna | amp     | BASIS      |
| PD4967            | CDK12 | cna | hetloss | BASIS      |
| PD5945            | CDK12 | cna | amp     | BASIS      |
| PD5948            | CDK12 | cna | gain    | BASIS      |
| PD6406            | CDK12 | cna | hetloss | BASIS      |
| PD6731            | CDK12 | cna | hetloss | BASIS      |
| PD7067            | CDK12 | cna | gain    | BASIS      |

|              |       |     |         |          |
|--------------|-------|-----|---------|----------|
| PD7215       | CDK12 | cna | gain    | BASIS    |
| PD9004       | CDK12 | cna | gain    | BASIS    |
| PD9585       | CDK12 | cna | hetloss | BASIS    |
| PD9702       | CDK12 | cna | gain    | BASIS    |
| TCGA-A2-A25B | CHD1  | cna | hetloss | TCGA     |
| TCGA-AN-A0XU | CHD1  | cna | hetloss | TCGA     |
| TCGA-AO-A0JL | CHD1  | cna | hetloss | TCGA     |
| TCGA-BH-A0C0 | CHD1  | cna | hetloss | TCGA     |
| TCGA-BH-A1FU | CHD1  | cna | hetloss | TCGA     |
| TCGA-C8-A12L | CHD1  | cna | hetloss | TCGA     |
| TCGA-D8-A27M | CHD1  | cna | hetloss | TCGA     |
| TCGA-E2-A1L7 | CHD1  | cna | hetloss | TCGA     |
| TCGA-E9-A1NC | CHD1  | cna | hetloss | TCGA     |
| TCGA-LL-A5YP | CHD1  | cna | hetloss | TCGA     |
| MB-0346      | CHD1  | cna | gain    | METABRIC |
| MB-2827      | CHD1  | cna | hetloss | METABRIC |
| MB-5070      | CHD1  | cna | hetloss | METABRIC |
| MB-5107      | CHD1  | cna | hetloss | METABRIC |
| MB-5465      | CHD1  | cna | hetloss | METABRIC |
| MB-6060      | CHD1  | cna | hetloss | METABRIC |
| MB-6098      | CHD1  | cna | hetloss | METABRIC |
| MB-7038      | CHD1  | cna | hetloss | METABRIC |
| MB-0420      | CHD1  | cna | hetloss | METABRIC |
| PD10014      | CHD1  | cna | hetloss | BASIS    |
| PD13296      | CHD1  | cna | hetloss | BASIS    |
| PD13297      | CHD1  | cna | hetloss | BASIS    |
| PD13299      | CHD1  | cna | hetloss | BASIS    |
| PD13771      | CHD1  | cna | gain    | BASIS    |
| PD22355      | CHD1  | cna | hetloss | BASIS    |
| PD23562      | CHD1  | cna | hetloss | BASIS    |
| PD23578      | CHD1  | cna | hetloss | BASIS    |
| PD24202      | CHD1  | cna | hetloss | BASIS    |
| PD24206      | CHD1  | cna | gain    | BASIS    |
| PD24337      | CHD1  | cna | hetloss | BASIS    |
| PD3890       | CHD1  | cna | hetloss | BASIS    |
| PD3905       | CHD1  | cna | gain    | BASIS    |
| PD4005       | CHD1  | cna | hetloss | BASIS    |
| PD4006       | CHD1  | cna | hetloss | BASIS    |
| PD4107       | CHD1  | cna | homdel  | BASIS    |
| PD5930       | CHD1  | cna | hetloss | BASIS    |
| PD5935       | CHD1  | cna | hetloss | BASIS    |
| PD5948       | CHD1  | cna | hetloss | BASIS    |
| PD6406       | CHD1  | cna | hetloss | BASIS    |
| PD6413       | CHD1  | cna | hetloss | BASIS    |
| PD6731       | CHD1  | cna | hetloss | BASIS    |
| PD7067       | CHD1  | cna | gain    | BASIS    |
| PD7215       | CHD1  | cna | hetloss | BASIS    |

|              |      |     |         |          |
|--------------|------|-----|---------|----------|
| PD8621       | CHD1 | cna | hetloss | BASIS    |
| PD9004       | CHD1 | cna | gain    | BASIS    |
| PD9585       | CHD1 | cna | hetloss | BASIS    |
| TCGA-A2-A25B | ELK4 | cna | amp     | TCGA     |
| TCGA-AN-A0XU | ELK4 | cna | hetloss | TCGA     |
| TCGA-AO-A0JL | ELK4 | cna | gain    | TCGA     |
| TCGA-BH-A0AW | ELK4 | cna | gain    | TCGA     |
| TCGA-BH-A0C0 | ELK4 | cna | gain    | TCGA     |
| TCGA-BH-A18R | ELK4 | cna | amp     | TCGA     |
| TCGA-BH-A1FU | ELK4 | cna | gain    | TCGA     |
| TCGA-C8-A12L | ELK4 | cna | gain    | TCGA     |
| TCGA-E2-A1L7 | ELK4 | cna | gain    | TCGA     |
| TCGA-E9-A1NC | ELK4 | cna | gain    | TCGA     |
| TCGA-EW-A10X | ELK4 | cna | gain    | TCGA     |
| TCGA-LL-A5YP | ELK4 | cna | hetloss | TCGA     |
| MB-0346      | ELK4 | cna | gain    | METABRIC |
| MB-5107      | ELK4 | cna | gain    | METABRIC |
| MB-5465      | ELK4 | cna | gain    | METABRIC |
| MB-6060      | ELK4 | cna | gain    | METABRIC |
| MB-6098      | ELK4 | cna | gain    | METABRIC |
| MB-7032      | ELK4 | cna | gain    | METABRIC |
| MB-7038      | ELK4 | cna | gain    | METABRIC |
| MB-7048      | ELK4 | cna | gain    | METABRIC |
| PD10014      | ELK4 | cna | gain    | BASIS    |
| PD13296      | ELK4 | cna | hetloss | BASIS    |
| PD13299      | ELK4 | cna | gain    | BASIS    |
| PD14442      | ELK4 | cna | gain    | BASIS    |
| PD23562      | ELK4 | cna | gain    | BASIS    |
| PD23574      | ELK4 | cna | gain    | BASIS    |
| PD24186      | ELK4 | cna | amp     | BASIS    |
| PD24206      | ELK4 | cna | gain    | BASIS    |
| PD24337      | ELK4 | cna | gain    | BASIS    |
| PD3890       | ELK4 | cna | gain    | BASIS    |
| PD3905       | ELK4 | cna | gain    | BASIS    |
| PD4005       | ELK4 | cna | gain    | BASIS    |
| PD4006       | ELK4 | cna | amp     | BASIS    |
| PD4107       | ELK4 | cna | gain    | BASIS    |
| PD4826       | ELK4 | cna | gain    | BASIS    |
| PD5935       | ELK4 | cna | gain    | BASIS    |
| PD5945       | ELK4 | cna | amp     | BASIS    |
| PD5948       | ELK4 | cna | amp     | BASIS    |
| PD6413       | ELK4 | cna | gain    | BASIS    |
| PD6731       | ELK4 | cna | hetloss | BASIS    |
| PD7067       | ELK4 | cna | gain    | BASIS    |
| PD7215       | ELK4 | cna | amp     | BASIS    |
| PD8621       | ELK4 | cna | gain    | BASIS    |
| PD8980       | ELK4 | cna | amp     | BASIS    |

|                   |       |     |         |            |
|-------------------|-------|-----|---------|------------|
| PD9004            | ELK4  | cna | gain    | BASIS      |
| PD9702            | ELK4  | cna | amp     | BASIS      |
| TCGA-A2-A25B      | ERBB2 | cna | hetloss | TCGA       |
| TCGA-AN-A0XU      | ERBB2 | cna | gain    | TCGA       |
| TCGA-AO-A0JL      | ERBB2 | cna | amp     | TCGA       |
| TCGA-BH-A0AW      | ERBB2 | cna | amp     | TCGA       |
| TCGA-BH-A0C0      | ERBB2 | cna | gain    | TCGA       |
| TCGA-BH-A18R      | ERBB2 | cna | amp     | TCGA       |
| TCGA-BH-A1FU      | ERBB2 | cna | amp     | TCGA       |
| TCGA-C8-A12L      | ERBB2 | cna | amp     | TCGA       |
| TCGA-D8-A27M      | ERBB2 | cna | hetloss | TCGA       |
| TCGA-E2-A1L7      | ERBB2 | cna | hetloss | TCGA       |
| TCGA-E9-A1NC      | ERBB2 | cna | hetloss | TCGA       |
| MB-0346           | ERBB2 | cna | amp     | METABRIC   |
| MB-2827           | ERBB2 | cna | hetloss | METABRIC   |
| MB-5070           | ERBB2 | cna | hetloss | METABRIC   |
| MB-5107           | ERBB2 | cna | gain    | METABRIC   |
| MB-5465           | ERBB2 | cna | hetloss | METABRIC   |
| MB-6060           | ERBB2 | cna | amp     | METABRIC   |
| MB-6098           | ERBB2 | cna | hetloss | METABRIC   |
| MB-6271           | ERBB2 | cna | hetloss | METABRIC   |
| MB-7038           | ERBB2 | cna | hetloss | METABRIC   |
| MB-7048           | ERBB2 | cna | gain    | METABRIC   |
| MB-0420           | ERBB2 | cna | hetloss | METABRIC   |
| P-0002023-T01-IM3 | ERBB2 | cna | amp     | MSK-IMPACT |
| P-0002858-T01-IM3 | ERBB2 | cna | amp     | MSK-IMPACT |
| P-0009557-T01-IM5 | ERBB2 | cna | amp     | MSK-IMPACT |
| PD13297           | ERBB2 | cna | hetloss | BASIS      |
| PD13299           | ERBB2 | cna | gain    | BASIS      |
| PD23561           | ERBB2 | cna | amp     | BASIS      |
| PD23562           | ERBB2 | cna | gain    | BASIS      |
| PD24186           | ERBB2 | cna | gain    | BASIS      |
| PD24206           | ERBB2 | cna | hetloss | BASIS      |
| PD24337           | ERBB2 | cna | hetloss | BASIS      |
| PD3890            | ERBB2 | cna | hetloss | BASIS      |
| PD3905            | ERBB2 | cna | gain    | BASIS      |
| PD4005            | ERBB2 | cna | hetloss | BASIS      |
| PD4826            | ERBB2 | cna | amp     | BASIS      |
| PD4967            | ERBB2 | cna | hetloss | BASIS      |
| PD5945            | ERBB2 | cna | amp     | BASIS      |
| PD5948            | ERBB2 | cna | gain    | BASIS      |
| PD6406            | ERBB2 | cna | hetloss | BASIS      |
| PD6731            | ERBB2 | cna | hetloss | BASIS      |
| PD7067            | ERBB2 | cna | gain    | BASIS      |
| PD7215            | ERBB2 | cna | gain    | BASIS      |
| PD9004            | ERBB2 | cna | gain    | BASIS      |
| PD9585            | ERBB2 | cna | hetloss | BASIS      |



|              |       |     |         |          |
|--------------|-------|-----|---------|----------|
| PD9702       | ERBB2 | cna | amp     | BASIS    |
| TCGA-A2-A25B | FCRL4 | cna | gain    | TCGA     |
| TCGA-AN-A0XU | FCRL4 | cna | gain    | TCGA     |
| TCGA-AO-A0JL | FCRL4 | cna | gain    | TCGA     |
| TCGA-BH-A0AW | FCRL4 | cna | gain    | TCGA     |
| TCGA-BH-A0C0 | FCRL4 | cna | hetloss | TCGA     |
| TCGA-BH-A18R | FCRL4 | cna | gain    | TCGA     |
| TCGA-BH-A1FU | FCRL4 | cna | gain    | TCGA     |
| TCGA-C8-A12L | FCRL4 | cna | gain    | TCGA     |
| TCGA-E2-A1L7 | FCRL4 | cna | gain    | TCGA     |
| TCGA-EW-A10X | FCRL4 | cna | gain    | TCGA     |
| TCGA-LL-A5YP | FCRL4 | cna | amp     | TCGA     |
| MB-2827      | FCRL4 | cna | amp     | METABRIC |
| MB-5070      | FCRL4 | cna | gain    | METABRIC |
| MB-5465      | FCRL4 | cna | gain    | METABRIC |
| MB-6060      | FCRL4 | cna | gain    | METABRIC |
| MB-6098      | FCRL4 | cna | amp     | METABRIC |
| MB-7032      | FCRL4 | cna | gain    | METABRIC |
| MB-7038      | FCRL4 | cna | gain    | METABRIC |
| PD10014      | FCRL4 | cna | gain    | BASIS    |
| PD11327      | FCRL4 | cna | amp     | BASIS    |
| PD13297      | FCRL4 | cna | gain    | BASIS    |
| PD13299      | FCRL4 | cna | gain    | BASIS    |
| PD14442      | FCRL4 | cna | gain    | BASIS    |
| PD22355      | FCRL4 | cna | gain    | BASIS    |
| PD23562      | FCRL4 | cna | amp     | BASIS    |
| PD23574      | FCRL4 | cna | amp     | BASIS    |
| PD24186      | FCRL4 | cna | gain    | BASIS    |
| PD24206      | FCRL4 | cna | gain    | BASIS    |
| PD3890       | FCRL4 | cna | gain    | BASIS    |
| PD3905       | FCRL4 | cna | gain    | BASIS    |
| PD4005       | FCRL4 | cna | gain    | BASIS    |
| PD4006       | FCRL4 | cna | amp     | BASIS    |
| PD4107       | FCRL4 | cna | gain    | BASIS    |
| PD4826       | FCRL4 | cna | gain    | BASIS    |
| PD5930       | FCRL4 | cna | gain    | BASIS    |
| PD5935       | FCRL4 | cna | gain    | BASIS    |
| PD5945       | FCRL4 | cna | amp     | BASIS    |
| PD5948       | FCRL4 | cna | gain    | BASIS    |
| PD6406       | FCRL4 | cna | gain    | BASIS    |
| PD6413       | FCRL4 | cna | gain    | BASIS    |
| PD7067       | FCRL4 | cna | gain    | BASIS    |
| PD7215       | FCRL4 | cna | gain    | BASIS    |
| PD8621       | FCRL4 | cna | amp     | BASIS    |
| PD8980       | FCRL4 | cna | gain    | BASIS    |
| PD9004       | FCRL4 | cna | gain    | BASIS    |
| PD9702       | FCRL4 | cna | gain    | BASIS    |

|                   |         |     |         |            |
|-------------------|---------|-----|---------|------------|
| TCGA-A2-A25B      | MAP3K14 | cna | hetloss | TCGA       |
| TCGA-AN-A0XU      | MAP3K14 | cna | hetloss | TCGA       |
| TCGA-AO-A0JL      | MAP3K14 | cna | hetloss | TCGA       |
| TCGA-BH-A0AW      | MAP3K14 | cna | homdel  | TCGA       |
| TCGA-BH-A0C0      | MAP3K14 | cna | gain    | TCGA       |
| TCGA-BH-A18R      | MAP3K14 | cna | homdel  | TCGA       |
| TCGA-BH-A1FU      | MAP3K14 | cna | homdel  | TCGA       |
| TCGA-C8-A12L      | MAP3K14 | cna | hetloss | TCGA       |
| TCGA-D8-A27M      | MAP3K14 | cna | hetloss | TCGA       |
| TCGA-E2-A1L7      | MAP3K14 | cna | hetloss | TCGA       |
| TCGA-E9-A1NC      | MAP3K14 | cna | hetloss | TCGA       |
| TCGA-EW-A1OX      | MAP3K14 | cna | homdel  | TCGA       |
| MB-0346           | MAP3K14 | cna | hetloss | METABRIC   |
| MB-2827           | MAP3K14 | cna | hetloss | METABRIC   |
| MB-5070           | MAP3K14 | cna | hetloss | METABRIC   |
| MB-5107           | MAP3K14 | cna | amp     | METABRIC   |
| MB-5465           | MAP3K14 | cna | hetloss | METABRIC   |
| MB-6060           | MAP3K14 | cna | hetloss | METABRIC   |
| MB-6098           | MAP3K14 | cna | hetloss | METABRIC   |
| MB-6271           | MAP3K14 | cna | hetloss | METABRIC   |
| MB-7038           | MAP3K14 | cna | hetloss | METABRIC   |
| MB-7048           | MAP3K14 | cna | hetloss | METABRIC   |
| P-0009557-T01-IM5 | MAP3K14 | cna | homdel  | MSK-IMPACT |
| PD13296           | MAP3K14 | cna | gain    | BASIS      |
| PD13297           | MAP3K14 | cna | hetloss | BASIS      |
| PD13299           | MAP3K14 | cna | gain    | BASIS      |
| PD13771           | MAP3K14 | cna | homdel  | BASIS      |
| PD23561           | MAP3K14 | cna | hetloss | BASIS      |
| PD23562           | MAP3K14 | cna | gain    | BASIS      |
| PD23574           | MAP3K14 | cna | gain    | BASIS      |
| PD24186           | MAP3K14 | cna | gain    | BASIS      |
| PD24206           | MAP3K14 | cna | hetloss | BASIS      |
| PD24337           | MAP3K14 | cna | hetloss | BASIS      |
| PD3890            | MAP3K14 | cna | hetloss | BASIS      |
| PD3905            | MAP3K14 | cna | gain    | BASIS      |
| PD4006            | MAP3K14 | cna | gain    | BASIS      |
| PD4826            | MAP3K14 | cna | hetloss | BASIS      |
| PD4967            | MAP3K14 | cna | hetloss | BASIS      |
| PD5945            | MAP3K14 | cna | amp     | BASIS      |
| PD6406            | MAP3K14 | cna | hetloss | BASIS      |
| PD6731            | MAP3K14 | cna | hetloss | BASIS      |
| PD7067            | MAP3K14 | cna | gain    | BASIS      |
| PD7215            | MAP3K14 | cna | gain    | BASIS      |
| PD9004            | MAP3K14 | cna | gain    | BASIS      |
| PD9585            | MAP3K14 | cna | hetloss | BASIS      |
| PD9702            | MAP3K14 | cna | amp     | BASIS      |
| TCGA-A2-A25B      | MDM4    | cna | amp     | TCGA       |

|              |       |     |         |          |
|--------------|-------|-----|---------|----------|
| TCGA-AN-A0XU | MDM4  | cna | hetloss | TCGA     |
| TCGA-AO-A0JL | MDM4  | cna | gain    | TCGA     |
| TCGA-BH-A0AW | MDM4  | cna | gain    | TCGA     |
| TCGA-BH-A0C0 | MDM4  | cna | gain    | TCGA     |
| TCGA-BH-A18R | MDM4  | cna | gain    | TCGA     |
| TCGA-BH-A1FU | MDM4  | cna | gain    | TCGA     |
| TCGA-C8-A12L | MDM4  | cna | gain    | TCGA     |
| TCGA-E2-A1L7 | MDM4  | cna | gain    | TCGA     |
| TCGA-E9-A1NC | MDM4  | cna | gain    | TCGA     |
| TCGA-EW-A10X | MDM4  | cna | gain    | TCGA     |
| TCGA-LL-A5YP | MDM4  | cna | gain    | TCGA     |
| MB-0346      | MDM4  | cna | gain    | METABRIC |
| MB-5107      | MDM4  | cna | gain    | METABRIC |
| MB-5465      | MDM4  | cna | gain    | METABRIC |
| MB-6060      | MDM4  | cna | gain    | METABRIC |
| MB-6098      | MDM4  | cna | gain    | METABRIC |
| MB-7032      | MDM4  | cna | gain    | METABRIC |
| MB-7038      | MDM4  | cna | gain    | METABRIC |
| MB-7048      | MDM4  | cna | gain    | METABRIC |
| PD10014      | MDM4  | cna | gain    | BASIS    |
| PD13296      | MDM4  | cna | hetloss | BASIS    |
| PD13299      | MDM4  | cna | gain    | BASIS    |
| PD14442      | MDM4  | cna | gain    | BASIS    |
| PD23562      | MDM4  | cna | gain    | BASIS    |
| PD23574      | MDM4  | cna | gain    | BASIS    |
| PD24186      | MDM4  | cna | amp     | BASIS    |
| PD24206      | MDM4  | cna | gain    | BASIS    |
| PD24337      | MDM4  | cna | gain    | BASIS    |
| PD3890       | MDM4  | cna | gain    | BASIS    |
| PD3905       | MDM4  | cna | gain    | BASIS    |
| PD4005       | MDM4  | cna | gain    | BASIS    |
| PD4006       | MDM4  | cna | amp     | BASIS    |
| PD4107       | MDM4  | cna | gain    | BASIS    |
| PD4826       | MDM4  | cna | gain    | BASIS    |
| PD5935       | MDM4  | cna | gain    | BASIS    |
| PD5945       | MDM4  | cna | amp     | BASIS    |
| PD5948       | MDM4  | cna | amp     | BASIS    |
| PD6413       | MDM4  | cna | gain    | BASIS    |
| PD6731       | MDM4  | cna | hetloss | BASIS    |
| PD7067       | MDM4  | cna | gain    | BASIS    |
| PD7215       | MDM4  | cna | amp     | BASIS    |
| PD8621       | MDM4  | cna | gain    | BASIS    |
| PD8980       | MDM4  | cna | amp     | BASIS    |
| PD9004       | MDM4  | cna | gain    | BASIS    |
| PD9702       | MDM4  | cna | amp     | BASIS    |
| TCGA-A2-A25B | MEF2C | cna | hetloss | TCGA     |
| TCGA-AN-A0XU | MEF2C | cna | hetloss | TCGA     |

|              |       |     |         |          |
|--------------|-------|-----|---------|----------|
| TCGA-AO-A0JL | MEF2C | cna | hetloss | TCGA     |
| TCGA-BH-A0C0 | MEF2C | cna | hetloss | TCGA     |
| TCGA-BH-A1FU | MEF2C | cna | hetloss | TCGA     |
| TCGA-C8-A12L | MEF2C | cna | hetloss | TCGA     |
| TCGA-D8-A27M | MEF2C | cna | hetloss | TCGA     |
| TCGA-E2-A1L7 | MEF2C | cna | hetloss | TCGA     |
| TCGA-E9-A1NC | MEF2C | cna | hetloss | TCGA     |
| TCGA-LL-A5YP | MEF2C | cna | hetloss | TCGA     |
| MB-0346      | MEF2C | cna | gain    | METABRIC |
| MB-2827      | MEF2C | cna | hetloss | METABRIC |
| MB-5070      | MEF2C | cna | hetloss | METABRIC |
| MB-5107      | MEF2C | cna | hetloss | METABRIC |
| MB-5465      | MEF2C | cna | hetloss | METABRIC |
| MB-6060      | MEF2C | cna | hetloss | METABRIC |
| MB-6098      | MEF2C | cna | hetloss | METABRIC |
| MB-0420      | MEF2C | cna | hetloss | METABRIC |
| MTS-T0064    | MEF2C | cna | hetloss | METABRIC |
| PD10014      | MEF2C | cna | hetloss | BASIS    |
| PD11742      | MEF2C | cna | hetloss | BASIS    |
| PD13296      | MEF2C | cna | hetloss | BASIS    |
| PD13297      | MEF2C | cna | hetloss | BASIS    |
| PD13299      | MEF2C | cna | hetloss | BASIS    |
| PD13771      | MEF2C | cna | gain    | BASIS    |
| PD22355      | MEF2C | cna | hetloss | BASIS    |
| PD23562      | MEF2C | cna | hetloss | BASIS    |
| PD24202      | MEF2C | cna | hetloss | BASIS    |
| PD24206      | MEF2C | cna | gain    | BASIS    |
| PD24337      | MEF2C | cna | hetloss | BASIS    |
| PD3890       | MEF2C | cna | hetloss | BASIS    |
| PD3905       | MEF2C | cna | gain    | BASIS    |
| PD4005       | MEF2C | cna | homdel  | BASIS    |
| PD4006       | MEF2C | cna | hetloss | BASIS    |
| PD4107       | MEF2C | cna | homdel  | BASIS    |
| PD5930       | MEF2C | cna | hetloss | BASIS    |
| PD5935       | MEF2C | cna | hetloss | BASIS    |
| PD5948       | MEF2C | cna | hetloss | BASIS    |
| PD6406       | MEF2C | cna | hetloss | BASIS    |
| PD6413       | MEF2C | cna | hetloss | BASIS    |
| PD6731       | MEF2C | cna | hetloss | BASIS    |
| PD7067       | MEF2C | cna | gain    | BASIS    |
| PD7215       | MEF2C | cna | hetloss | BASIS    |
| PD8621       | MEF2C | cna | hetloss | BASIS    |
| PD8980       | MEF2C | cna | hetloss | BASIS    |
| PD9585       | MEF2C | cna | hetloss | BASIS    |
| TCGA-AO-A0JL | PDS5B | cna | hetloss | TCGA     |
| TCGA-BH-A0AW | PDS5B | cna | hetloss | TCGA     |
| TCGA-BH-A0C0 | PDS5B | cna | gain    | TCGA     |

|              |       |     |         |          |
|--------------|-------|-----|---------|----------|
| TCGA-BH-A1FU | PDS5B | cna | hetloss | TCGA     |
| TCGA-C8-A12L | PDS5B | cna | hetloss | TCGA     |
| TCGA-D8-A27M | PDS5B | cna | hetloss | TCGA     |
| TCGA-E9-A1NC | PDS5B | cna | hetloss | TCGA     |
| TCGA-EW-A1OX | PDS5B | cna | homdel  | TCGA     |
| TCGA-LL-A5YP | PDS5B | cna | hetloss | TCGA     |
| MB-0346      | PDS5B | cna | hetloss | METABRIC |
| MB-2827      | PDS5B | cna | hetloss | METABRIC |
| MB-5107      | PDS5B | cna | hetloss | METABRIC |
| MB-6060      | PDS5B | cna | gain    | METABRIC |
| MB-6098      | PDS5B | cna | hetloss | METABRIC |
| MB-7032      | PDS5B | cna | hetloss | METABRIC |
| MB-0420      | PDS5B | cna | hetloss | METABRIC |
| MTS-T0064    | PDS5B | cna | hetloss | METABRIC |
| PD10014      | PDS5B | cna | hetloss | BASIS    |
| PD11742      | PDS5B | cna | hetloss | BASIS    |
| PD13296      | PDS5B | cna | hetloss | BASIS    |
| PD13297      | PDS5B | cna | hetloss | BASIS    |
| PD13771      | PDS5B | cna | hetloss | BASIS    |
| PD14442      | PDS5B | cna | hetloss | BASIS    |
| PD22355      | PDS5B | cna | hetloss | BASIS    |
| PD23562      | PDS5B | cna | gain    | BASIS    |
| PD23578      | PDS5B | cna | hetloss | BASIS    |
| PD24202      | PDS5B | cna | hetloss | BASIS    |
| PD24206      | PDS5B | cna | gain    | BASIS    |
| PD3890       | PDS5B | cna | hetloss | BASIS    |
| PD3905       | PDS5B | cna | gain    | BASIS    |
| PD4005       | PDS5B | cna | homdel  | BASIS    |
| PD4006       | PDS5B | cna | hetloss | BASIS    |
| PD4107       | PDS5B | cna | gain    | BASIS    |
| PD4826       | PDS5B | cna | hetloss | BASIS    |
| PD4967       | PDS5B | cna | hetloss | BASIS    |
| PD5945       | PDS5B | cna | amp     | BASIS    |
| PD5948       | PDS5B | cna | gain    | BASIS    |
| PD6406       | PDS5B | cna | hetloss | BASIS    |
| PD6413       | PDS5B | cna | hetloss | BASIS    |
| PD6731       | PDS5B | cna | hetloss | BASIS    |
| PD7067       | PDS5B | cna | gain    | BASIS    |
| PD7215       | PDS5B | cna | gain    | BASIS    |
| PD8621       | PDS5B | cna | hetloss | BASIS    |
| PD8980       | PDS5B | cna | hetloss | BASIS    |
| PD9585       | PDS5B | cna | gain    | BASIS    |
| PD9702       | PDS5B | cna | gain    | BASIS    |
| TCGA-A2-A25B | PRCC  | cna | gain    | TCGA     |
| TCGA-AN-A0XU | PRCC  | cna | gain    | TCGA     |
| TCGA-AO-A0JL | PRCC  | cna | gain    | TCGA     |
| TCGA-BH-A0AW | PRCC  | cna | gain    | TCGA     |

|              |       |     |         |          |
|--------------|-------|-----|---------|----------|
| TCGA-BH-A0C0 | PRCC  | cna | hetloss | TCGA     |
| TCGA-BH-A18R | PRCC  | cna | gain    | TCGA     |
| TCGA-BH-A1FU | PRCC  | cna | gain    | TCGA     |
| TCGA-C8-A12L | PRCC  | cna | gain    | TCGA     |
| TCGA-E2-A1L7 | PRCC  | cna | gain    | TCGA     |
| TCGA-EW-A10X | PRCC  | cna | gain    | TCGA     |
| TCGA-LL-A5YP | PRCC  | cna | amp     | TCGA     |
| MB-2827      | PRCC  | cna | amp     | METABRIC |
| MB-5070      | PRCC  | cna | gain    | METABRIC |
| MB-5465      | PRCC  | cna | gain    | METABRIC |
| MB-6060      | PRCC  | cna | gain    | METABRIC |
| MB-6098      | PRCC  | cna | amp     | METABRIC |
| MB-7032      | PRCC  | cna | gain    | METABRIC |
| MB-7038      | PRCC  | cna | gain    | METABRIC |
| PD10014      | PRCC  | cna | gain    | BASIS    |
| PD11327      | PRCC  | cna | gain    | BASIS    |
| PD13297      | PRCC  | cna | gain    | BASIS    |
| PD13299      | PRCC  | cna | gain    | BASIS    |
| PD14442      | PRCC  | cna | gain    | BASIS    |
| PD22355      | PRCC  | cna | gain    | BASIS    |
| PD23562      | PRCC  | cna | amp     | BASIS    |
| PD23574      | PRCC  | cna | amp     | BASIS    |
| PD24186      | PRCC  | cna | gain    | BASIS    |
| PD24206      | PRCC  | cna | gain    | BASIS    |
| PD3890       | PRCC  | cna | gain    | BASIS    |
| PD3905       | PRCC  | cna | gain    | BASIS    |
| PD4005       | PRCC  | cna | gain    | BASIS    |
| PD4006       | PRCC  | cna | amp     | BASIS    |
| PD4107       | PRCC  | cna | gain    | BASIS    |
| PD4826       | PRCC  | cna | gain    | BASIS    |
| PD5930       | PRCC  | cna | gain    | BASIS    |
| PD5935       | PRCC  | cna | gain    | BASIS    |
| PD5945       | PRCC  | cna | amp     | BASIS    |
| PD5948       | PRCC  | cna | gain    | BASIS    |
| PD6406       | PRCC  | cna | gain    | BASIS    |
| PD6413       | PRCC  | cna | gain    | BASIS    |
| PD7067       | PRCC  | cna | gain    | BASIS    |
| PD7215       | PRCC  | cna | gain    | BASIS    |
| PD8621       | PRCC  | cna | amp     | BASIS    |
| PD8980       | PRCC  | cna | gain    | BASIS    |
| PD9004       | PRCC  | cna | amp     | BASIS    |
| PD9702       | PRCC  | cna | amp     | BASIS    |
| TCGA-A2-A25B | RASA1 | cna | hetloss | TCGA     |
| TCGA-AN-A0XU | RASA1 | cna | hetloss | TCGA     |
| TCGA-AO-A0JL | RASA1 | cna | hetloss | TCGA     |
| TCGA-BH-A0C0 | RASA1 | cna | hetloss | TCGA     |
| TCGA-BH-A1FU | RASA1 | cna | hetloss | TCGA     |

|              |       |     |         |          |
|--------------|-------|-----|---------|----------|
| TCGA-C8-A12L | RASA1 | cna | hetloss | TCGA     |
| TCGA-D8-A27M | RASA1 | cna | hetloss | TCGA     |
| TCGA-E2-A1L7 | RASA1 | cna | hetloss | TCGA     |
| TCGA-E9-A1NC | RASA1 | cna | hetloss | TCGA     |
| TCGA-LL-A5YP | RASA1 | cna | hetloss | TCGA     |
| MB-0346      | RASA1 | cna | gain    | METABRIC |
| MB-2827      | RASA1 | cna | hetloss | METABRIC |
| MB-5070      | RASA1 | cna | hetloss | METABRIC |
| MB-5107      | RASA1 | cna | hetloss | METABRIC |
| MB-5465      | RASA1 | cna | hetloss | METABRIC |
| MB-6060      | RASA1 | cna | hetloss | METABRIC |
| MB-6098      | RASA1 | cna | hetloss | METABRIC |
| MB-0420      | RASA1 | cna | hetloss | METABRIC |
| MTS-T0064    | RASA1 | cna | hetloss | METABRIC |
| PD10014      | RASA1 | cna | hetloss | BASIS    |
| PD11742      | RASA1 | cna | hetloss | BASIS    |
| PD13296      | RASA1 | cna | hetloss | BASIS    |
| PD13297      | RASA1 | cna | hetloss | BASIS    |
| PD13299      | RASA1 | cna | hetloss | BASIS    |
| PD13771      | RASA1 | cna | gain    | BASIS    |
| PD22355      | RASA1 | cna | hetloss | BASIS    |
| PD23562      | RASA1 | cna | hetloss | BASIS    |
| PD24202      | RASA1 | cna | hetloss | BASIS    |
| PD24206      | RASA1 | cna | gain    | BASIS    |
| PD24337      | RASA1 | cna | hetloss | BASIS    |
| PD3890       | RASA1 | cna | hetloss | BASIS    |
| PD3905       | RASA1 | cna | gain    | BASIS    |
| PD4005       | RASA1 | cna | hetloss | BASIS    |
| PD4006       | RASA1 | cna | hetloss | BASIS    |
| PD4107       | RASA1 | cna | homdel  | BASIS    |
| PD5930       | RASA1 | cna | hetloss | BASIS    |
| PD5935       | RASA1 | cna | hetloss | BASIS    |
| PD5948       | RASA1 | cna | hetloss | BASIS    |
| PD6406       | RASA1 | cna | hetloss | BASIS    |
| PD6413       | RASA1 | cna | hetloss | BASIS    |
| PD6731       | RASA1 | cna | hetloss | BASIS    |
| PD7067       | RASA1 | cna | gain    | BASIS    |
| PD7215       | RASA1 | cna | hetloss | BASIS    |
| PD8621       | RASA1 | cna | hetloss | BASIS    |
| PD8980       | RASA1 | cna | gain    | BASIS    |
| PD9585       | RASA1 | cna | hetloss | BASIS    |
| TCGA-A2-A25B | RFWD2 | cna | amp     | TCGA     |
| TCGA-AN-A0XU | RFWD2 | cna | gain    | TCGA     |
| TCGA-AO-A0JL | RFWD2 | cna | gain    | TCGA     |
| TCGA-BH-A0AW | RFWD2 | cna | gain    | TCGA     |
| TCGA-BH-A0C0 | RFWD2 | cna | gain    | TCGA     |
| TCGA-BH-A18R | RFWD2 | cna | gain    | TCGA     |

|              |       |     |         |          |
|--------------|-------|-----|---------|----------|
| TCGA-BH-A1FU | RFWD2 | cna | gain    | TCGA     |
| TCGA-C8-A12L | RFWD2 | cna | gain    | TCGA     |
| TCGA-E2-A1L7 | RFWD2 | cna | gain    | TCGA     |
| TCGA-E9-A1NC | RFWD2 | cna | hetloss | TCGA     |
| TCGA-EW-A10X | RFWD2 | cna | gain    | TCGA     |
| TCGA-LL-A5YP | RFWD2 | cna | amp     | TCGA     |
| MB-0346      | RFWD2 | cna | gain    | METABRIC |
| MB-5465      | RFWD2 | cna | amp     | METABRIC |
| MB-6098      | RFWD2 | cna | amp     | METABRIC |
| MB-7032      | RFWD2 | cna | gain    | METABRIC |
| MB-7038      | RFWD2 | cna | gain    | METABRIC |
| PD10014      | RFWD2 | cna | gain    | BASIS    |
| PD11327      | RFWD2 | cna | gain    | BASIS    |
| PD13297      | RFWD2 | cna | gain    | BASIS    |
| PD13299      | RFWD2 | cna | gain    | BASIS    |
| PD13771      | RFWD2 | cna | hetloss | BASIS    |
| PD14442      | RFWD2 | cna | gain    | BASIS    |
| PD22355      | RFWD2 | cna | gain    | BASIS    |
| PD23562      | RFWD2 | cna | gain    | BASIS    |
| PD23574      | RFWD2 | cna | gain    | BASIS    |
| PD24186      | RFWD2 | cna | amp     | BASIS    |
| PD24206      | RFWD2 | cna | gain    | BASIS    |
| PD24337      | RFWD2 | cna | hetloss | BASIS    |
| PD3890       | RFWD2 | cna | gain    | BASIS    |
| PD3905       | RFWD2 | cna | gain    | BASIS    |
| PD4005       | RFWD2 | cna | gain    | BASIS    |
| PD4006       | RFWD2 | cna | gain    | BASIS    |
| PD4107       | RFWD2 | cna | gain    | BASIS    |
| PD4826       | RFWD2 | cna | gain    | BASIS    |
| PD5935       | RFWD2 | cna | gain    | BASIS    |
| PD5945       | RFWD2 | cna | amp     | BASIS    |
| PD5948       | RFWD2 | cna | gain    | BASIS    |
| PD6406       | RFWD2 | cna | gain    | BASIS    |
| PD6413       | RFWD2 | cna | gain    | BASIS    |
| PD7067       | RFWD2 | cna | gain    | BASIS    |
| PD7215       | RFWD2 | cna | amp     | BASIS    |
| PD8621       | RFWD2 | cna | gain    | BASIS    |
| PD8980       | RFWD2 | cna | gain    | BASIS    |
| PD9004       | RFWD2 | cna | gain    | BASIS    |
| PD9702       | RFWD2 | cna | gain    | BASIS    |
| TCGA-A2-A25B | RIT1  | cna | gain    | TCGA     |
| TCGA-AN-A0XU | RIT1  | cna | gain    | TCGA     |
| TCGA-AO-A0JL | RIT1  | cna | gain    | TCGA     |
| TCGA-BH-A0AW | RIT1  | cna | gain    | TCGA     |
| TCGA-BH-A0C0 | RIT1  | cna | hetloss | TCGA     |
| TCGA-BH-A18R | RIT1  | cna | gain    | TCGA     |
| TCGA-BH-A1FU | RIT1  | cna | gain    | TCGA     |



|              |        |     |         |          |
|--------------|--------|-----|---------|----------|
| TCGA-C8-A12L | RIT1   | cna | gain    | TCGA     |
| TCGA-E2-A1L7 | RIT1   | cna | gain    | TCGA     |
| TCGA-EW-A10X | RIT1   | cna | gain    | TCGA     |
| TCGA-LL-A5YP | RIT1   | cna | amp     | TCGA     |
| MB-2827      | RIT1   | cna | amp     | METABRIC |
| MB-5070      | RIT1   | cna | gain    | METABRIC |
| MB-6060      | RIT1   | cna | gain    | METABRIC |
| MB-6098      | RIT1   | cna | amp     | METABRIC |
| MB-7032      | RIT1   | cna | gain    | METABRIC |
| MB-7038      | RIT1   | cna | gain    | METABRIC |
| PD10014      | RIT1   | cna | gain    | BASIS    |
| PD11327      | RIT1   | cna | gain    | BASIS    |
| PD13297      | RIT1   | cna | gain    | BASIS    |
| PD13299      | RIT1   | cna | gain    | BASIS    |
| PD13771      | RIT1   | cna | gain    | BASIS    |
| PD14442      | RIT1   | cna | gain    | BASIS    |
| PD22355      | RIT1   | cna | gain    | BASIS    |
| PD23562      | RIT1   | cna | amp     | BASIS    |
| PD23574      | RIT1   | cna | amp     | BASIS    |
| PD24186      | RIT1   | cna | gain    | BASIS    |
| PD24206      | RIT1   | cna | gain    | BASIS    |
| PD3890       | RIT1   | cna | gain    | BASIS    |
| PD3905       | RIT1   | cna | gain    | BASIS    |
| PD4005       | RIT1   | cna | gain    | BASIS    |
| PD4006       | RIT1   | cna | amp     | BASIS    |
| PD4107       | RIT1   | cna | gain    | BASIS    |
| PD4826       | RIT1   | cna | gain    | BASIS    |
| PD5930       | RIT1   | cna | gain    | BASIS    |
| PD5935       | RIT1   | cna | gain    | BASIS    |
| PD5945       | RIT1   | cna | amp     | BASIS    |
| PD5948       | RIT1   | cna | gain    | BASIS    |
| PD6406       | RIT1   | cna | gain    | BASIS    |
| PD6413       | RIT1   | cna | gain    | BASIS    |
| PD7067       | RIT1   | cna | gain    | BASIS    |
| PD7215       | RIT1   | cna | gain    | BASIS    |
| PD8621       | RIT1   | cna | amp     | BASIS    |
| PD8980       | RIT1   | cna | gain    | BASIS    |
| PD9004       | RIT1   | cna | gain    | BASIS    |
| PD9702       | RIT1   | cna | amp     | BASIS    |
| TCGA-A2-A25B | RNF213 | cna | gain    | TCGA     |
| TCGA-AN-A0XU | RNF213 | cna | amp     | TCGA     |
| TCGA-AO-A0JL | RNF213 | cna | hetloss | TCGA     |
| TCGA-BH-A0AW | RNF213 | cna | amp     | TCGA     |
| TCGA-BH-A0C0 | RNF213 | cna | gain    | TCGA     |
| TCGA-BH-A18R | RNF213 | cna | amp     | TCGA     |
| TCGA-C8-A12L | RNF213 | cna | gain    | TCGA     |
| TCGA-D8-A27M | RNF213 | cna | gain    | TCGA     |

|              |         |     |         |          |
|--------------|---------|-----|---------|----------|
| TCGA-E2-A1L7 | RNF213  | cna | gain    | TCGA     |
| TCGA-EW-A10X | RNF213  | cna | amp     | TCGA     |
| TCGA-LL-A5YP | RNF213  | cna | amp     | TCGA     |
| MB-0346      | RNF213  | cna | gain    | METABRIC |
| MB-2827      | RNF213  | cna | hetloss | METABRIC |
| MB-5070      | RNF213  | cna | amp     | METABRIC |
| MB-5107      | RNF213  | cna | amp     | METABRIC |
| MB-5465      | RNF213  | cna | gain    | METABRIC |
| MB-6060      | RNF213  | cna | hetloss | METABRIC |
| MB-6098      | RNF213  | cna | gain    | METABRIC |
| MB-6271      | RNF213  | cna | hetloss | METABRIC |
| MTS-T0064    | RNF213  | cna | gain    | METABRIC |
| PD10014      | RNF213  | cna | gain    | BASIS    |
| PD11327      | RNF213  | cna | amp     | BASIS    |
| PD22355      | RNF213  | cna | hetloss | BASIS    |
| PD23561      | RNF213  | cna | hetloss | BASIS    |
| PD23574      | RNF213  | cna | amp     | BASIS    |
| PD24186      | RNF213  | cna | amp     | BASIS    |
| PD24202      | RNF213  | cna | gain    | BASIS    |
| PD24206      | RNF213  | cna | hetloss | BASIS    |
| PD3890       | RNF213  | cna | gain    | BASIS    |
| PD3905       | RNF213  | cna | gain    | BASIS    |
| PD4006       | RNF213  | cna | gain    | BASIS    |
| PD4107       | RNF213  | cna | gain    | BASIS    |
| PD4826       | RNF213  | cna | amp     | BASIS    |
| PD4967       | RNF213  | cna | hetloss | BASIS    |
| PD5930       | RNF213  | cna | gain    | BASIS    |
| PD5935       | RNF213  | cna | gain    | BASIS    |
| PD5945       | RNF213  | cna | amp     | BASIS    |
| PD5948       | RNF213  | cna | gain    | BASIS    |
| PD6413       | RNF213  | cna | hetloss | BASIS    |
| PD6731       | RNF213  | cna | hetloss | BASIS    |
| PD7067       | RNF213  | cna | gain    | BASIS    |
| PD7215       | RNF213  | cna | gain    | BASIS    |
| PD8621       | RNF213  | cna | gain    | BASIS    |
| PD9004       | RNF213  | cna | gain    | BASIS    |
| PD9585       | RNF213  | cna | gain    | BASIS    |
| PD9702       | RNF213  | cna | gain    | BASIS    |
| TCGA-A2-A25B | SLC45A3 | cna | amp     | TCGA     |
| TCGA-AN-A0XU | SLC45A3 | cna | hetloss | TCGA     |
| TCGA-AO-A0JL | SLC45A3 | cna | gain    | TCGA     |
| TCGA-BH-A0AW | SLC45A3 | cna | gain    | TCGA     |
| TCGA-BH-A0C0 | SLC45A3 | cna | gain    | TCGA     |
| TCGA-BH-A18R | SLC45A3 | cna | amp     | TCGA     |
| TCGA-BH-A1FU | SLC45A3 | cna | gain    | TCGA     |
| TCGA-C8-A12L | SLC45A3 | cna | gain    | TCGA     |
| TCGA-E2-A1L7 | SLC45A3 | cna | gain    | TCGA     |

|              |         |     |         |          |
|--------------|---------|-----|---------|----------|
| TCGA-E9-A1NC | SLC45A3 | cna | gain    | TCGA     |
| TCGA-EW-A10X | SLC45A3 | cna | gain    | TCGA     |
| TCGA-LL-A5YP | SLC45A3 | cna | hetloss | TCGA     |
| MB-0346      | SLC45A3 | cna | gain    | METABRIC |
| MB-5107      | SLC45A3 | cna | gain    | METABRIC |
| MB-5465      | SLC45A3 | cna | gain    | METABRIC |
| MB-6060      | SLC45A3 | cna | gain    | METABRIC |
| MB-6098      | SLC45A3 | cna | gain    | METABRIC |
| MB-7032      | SLC45A3 | cna | gain    | METABRIC |
| MB-7038      | SLC45A3 | cna | gain    | METABRIC |
| MB-7048      | SLC45A3 | cna | gain    | METABRIC |
| PD10014      | SLC45A3 | cna | gain    | BASIS    |
| PD13296      | SLC45A3 | cna | hetloss | BASIS    |
| PD13299      | SLC45A3 | cna | gain    | BASIS    |
| PD14442      | SLC45A3 | cna | gain    | BASIS    |
| PD23562      | SLC45A3 | cna | gain    | BASIS    |
| PD23574      | SLC45A3 | cna | gain    | BASIS    |
| PD24186      | SLC45A3 | cna | amp     | BASIS    |
| PD24206      | SLC45A3 | cna | gain    | BASIS    |
| PD24337      | SLC45A3 | cna | gain    | BASIS    |
| PD3890       | SLC45A3 | cna | gain    | BASIS    |
| PD3905       | SLC45A3 | cna | gain    | BASIS    |
| PD4005       | SLC45A3 | cna | gain    | BASIS    |
| PD4006       | SLC45A3 | cna | amp     | BASIS    |
| PD4107       | SLC45A3 | cna | gain    | BASIS    |
| PD4826       | SLC45A3 | cna | gain    | BASIS    |
| PD5935       | SLC45A3 | cna | gain    | BASIS    |
| PD5945       | SLC45A3 | cna | amp     | BASIS    |
| PD5948       | SLC45A3 | cna | amp     | BASIS    |
| PD6413       | SLC45A3 | cna | gain    | BASIS    |
| PD6731       | SLC45A3 | cna | hetloss | BASIS    |
| PD7067       | SLC45A3 | cna | gain    | BASIS    |
| PD7215       | SLC45A3 | cna | amp     | BASIS    |
| PD8621       | SLC45A3 | cna | gain    | BASIS    |
| PD8980       | SLC45A3 | cna | amp     | BASIS    |
| PD9004       | SLC45A3 | cna | gain    | BASIS    |
| PD9702       | SLC45A3 | cna | amp     | BASIS    |
| TCGA-A2-A25B | TPM3    | cna | gain    | TCGA     |
| TCGA-AN-A0XU | TPM3    | cna | gain    | TCGA     |
| TCGA-AO-A0JL | TPM3    | cna | gain    | TCGA     |
| TCGA-BH-A0AW | TPM3    | cna | gain    | TCGA     |
| TCGA-BH-A0C0 | TPM3    | cna | hetloss | TCGA     |
| TCGA-BH-A18R | TPM3    | cna | gain    | TCGA     |
| TCGA-BH-A1FU | TPM3    | cna | gain    | TCGA     |
| TCGA-C8-A12L | TPM3    | cna | gain    | TCGA     |
| TCGA-E2-A1L7 | TPM3    | cna | gain    | TCGA     |
| TCGA-EW-A10X | TPM3    | cna | gain    | TCGA     |

|              |        |     |         |          |
|--------------|--------|-----|---------|----------|
| TCGA-LL-A5YP | TPM3   | cna | amp     | TCGA     |
| MB-2827      | TPM3   | cna | amp     | METABRIC |
| MB-5070      | TPM3   | cna | gain    | METABRIC |
| MB-6060      | TPM3   | cna | gain    | METABRIC |
| MB-6098      | TPM3   | cna | amp     | METABRIC |
| MB-7032      | TPM3   | cna | gain    | METABRIC |
| MB-7048      | TPM3   | cna | hetloss | METABRIC |
| PD10014      | TPM3   | cna | gain    | BASIS    |
| PD11327      | TPM3   | cna | gain    | BASIS    |
| PD13297      | TPM3   | cna | gain    | BASIS    |
| PD13299      | TPM3   | cna | gain    | BASIS    |
| PD14442      | TPM3   | cna | gain    | BASIS    |
| PD22355      | TPM3   | cna | gain    | BASIS    |
| PD23562      | TPM3   | cna | amp     | BASIS    |
| PD23574      | TPM3   | cna | amp     | BASIS    |
| PD24186      | TPM3   | cna | gain    | BASIS    |
| PD24206      | TPM3   | cna | gain    | BASIS    |
| PD3890       | TPM3   | cna | gain    | BASIS    |
| PD3905       | TPM3   | cna | gain    | BASIS    |
| PD4005       | TPM3   | cna | gain    | BASIS    |
| PD4006       | TPM3   | cna | amp     | BASIS    |
| PD4107       | TPM3   | cna | gain    | BASIS    |
| PD4826       | TPM3   | cna | gain    | BASIS    |
| PD4967       | TPM3   | cna | hetloss | BASIS    |
| PD5930       | TPM3   | cna | amp     | BASIS    |
| PD5935       | TPM3   | cna | gain    | BASIS    |
| PD5945       | TPM3   | cna | amp     | BASIS    |
| PD5948       | TPM3   | cna | gain    | BASIS    |
| PD6406       | TPM3   | cna | gain    | BASIS    |
| PD6413       | TPM3   | cna | gain    | BASIS    |
| PD7067       | TPM3   | cna | amp     | BASIS    |
| PD7215       | TPM3   | cna | gain    | BASIS    |
| PD8621       | TPM3   | cna | amp     | BASIS    |
| PD8980       | TPM3   | cna | gain    | BASIS    |
| PD9004       | TPM3   | cna | amp     | BASIS    |
| PD9702       | TPM3   | cna | amp     | BASIS    |
| TCGA-A2-A25B | YY1AP1 | cna | gain    | TCGA     |
| TCGA-AN-A0XU | YY1AP1 | cna | gain    | TCGA     |
| TCGA-AO-A0JL | YY1AP1 | cna | gain    | TCGA     |
| TCGA-BH-A0AW | YY1AP1 | cna | gain    | TCGA     |
| TCGA-BH-A0C0 | YY1AP1 | cna | hetloss | TCGA     |
| TCGA-BH-A18R | YY1AP1 | cna | gain    | TCGA     |
| TCGA-BH-A1FU | YY1AP1 | cna | gain    | TCGA     |
| TCGA-C8-A12L | YY1AP1 | cna | gain    | TCGA     |
| TCGA-E2-A1L7 | YY1AP1 | cna | gain    | TCGA     |
| TCGA-EW-A10X | YY1AP1 | cna | gain    | TCGA     |
| TCGA-LL-A5YP | YY1AP1 | cna | amp     | TCGA     |

|              |        |     |         |          |
|--------------|--------|-----|---------|----------|
| MB-2827      | YY1AP1 | cna | amp     | METABRIC |
| MB-5070      | YY1AP1 | cna | gain    | METABRIC |
| MB-6060      | YY1AP1 | cna | gain    | METABRIC |
| MB-6098      | YY1AP1 | cna | amp     | METABRIC |
| MB-7032      | YY1AP1 | cna | gain    | METABRIC |
| MB-7038      | YY1AP1 | cna | gain    | METABRIC |
| PD10014      | YY1AP1 | cna | gain    | BASIS    |
| PD11327      | YY1AP1 | cna | gain    | BASIS    |
| PD13297      | YY1AP1 | cna | gain    | BASIS    |
| PD13299      | YY1AP1 | cna | gain    | BASIS    |
| PD13771      | YY1AP1 | cna | gain    | BASIS    |
| PD14442      | YY1AP1 | cna | gain    | BASIS    |
| PD22355      | YY1AP1 | cna | gain    | BASIS    |
| PD23562      | YY1AP1 | cna | amp     | BASIS    |
| PD23574      | YY1AP1 | cna | amp     | BASIS    |
| PD24186      | YY1AP1 | cna | gain    | BASIS    |
| PD24206      | YY1AP1 | cna | gain    | BASIS    |
| PD3890       | YY1AP1 | cna | gain    | BASIS    |
| PD3905       | YY1AP1 | cna | gain    | BASIS    |
| PD4005       | YY1AP1 | cna | gain    | BASIS    |
| PD4006       | YY1AP1 | cna | amp     | BASIS    |
| PD4107       | YY1AP1 | cna | gain    | BASIS    |
| PD4826       | YY1AP1 | cna | gain    | BASIS    |
| PD5930       | YY1AP1 | cna | gain    | BASIS    |
| PD5935       | YY1AP1 | cna | gain    | BASIS    |
| PD5945       | YY1AP1 | cna | amp     | BASIS    |
| PD5948       | YY1AP1 | cna | gain    | BASIS    |
| PD6406       | YY1AP1 | cna | gain    | BASIS    |
| PD6413       | YY1AP1 | cna | gain    | BASIS    |
| PD7067       | YY1AP1 | cna | gain    | BASIS    |
| PD7215       | YY1AP1 | cna | gain    | BASIS    |
| PD8621       | YY1AP1 | cna | amp     | BASIS    |
| PD8980       | YY1AP1 | cna | gain    | BASIS    |
| PD9004       | YY1AP1 | cna | gain    | BASIS    |
| PD9702       | YY1AP1 | cna | amp     | BASIS    |
| TCGA-A2-A25B | AXIN2  | cna | amp     | TCGA     |
| TCGA-AN-A0XU | AXIN2  | cna | gain    | TCGA     |
| TCGA-AO-A0JL | AXIN2  | cna | hetloss | TCGA     |
| TCGA-BH-A0AW | AXIN2  | cna | amp     | TCGA     |
| TCGA-BH-A0C0 | AXIN2  | cna | gain    | TCGA     |
| TCGA-C8-A12L | AXIN2  | cna | gain    | TCGA     |
| TCGA-D8-A27M | AXIN2  | cna | hetloss | TCGA     |
| TCGA-EW-A10X | AXIN2  | cna | amp     | TCGA     |
| TCGA-LL-A5YP | AXIN2  | cna | amp     | TCGA     |
| MB-0346      | AXIN2  | cna | gain    | METABRIC |
| MB-2827      | AXIN2  | cna | hetloss | METABRIC |
| MB-5070      | AXIN2  | cna | gain    | METABRIC |

|                   |       |     |         |            |
|-------------------|-------|-----|---------|------------|
| MB-5107           | AXIN2 | cna | amp     | METABRIC   |
| MB-5323           | AXIN2 | cna | gain    | METABRIC   |
| MB-6060           | AXIN2 | cna | amp     | METABRIC   |
| MB-6098           | AXIN2 | cna | gain    | METABRIC   |
| MB-6271           | AXIN2 | cna | hetloss | METABRIC   |
| MB-7048           | AXIN2 | cna | hetloss | METABRIC   |
| MTS-T0064         | AXIN2 | cna | gain    | METABRIC   |
| P-0002858-T01-IM3 | AXIN2 | cna | amp     | MSK-IMPACT |
| PD11327           | AXIN2 | cna | gain    | BASIS      |
| PD11742           | AXIN2 | cna | gain    | BASIS      |
| PD22355           | AXIN2 | cna | gain    | BASIS      |
| PD23562           | AXIN2 | cna | gain    | BASIS      |
| PD23574           | AXIN2 | cna | gain    | BASIS      |
| PD24186           | AXIN2 | cna | gain    | BASIS      |
| PD24202           | AXIN2 | cna | gain    | BASIS      |
| PD24206           | AXIN2 | cna | hetloss | BASIS      |
| PD24337           | AXIN2 | cna | hetloss | BASIS      |
| PD3890            | AXIN2 | cna | gain    | BASIS      |
| PD3905            | AXIN2 | cna | gain    | BASIS      |
| PD4006            | AXIN2 | cna | gain    | BASIS      |
| PD4107            | AXIN2 | cna | gain    | BASIS      |
| PD4967            | AXIN2 | cna | homdel  | BASIS      |
| PD5930            | AXIN2 | cna | gain    | BASIS      |
| PD5935            | AXIN2 | cna | gain    | BASIS      |
| PD5945            | AXIN2 | cna | amp     | BASIS      |
| PD5948            | AXIN2 | cna | gain    | BASIS      |
| PD6731            | AXIN2 | cna | hetloss | BASIS      |
| PD7067            | AXIN2 | cna | gain    | BASIS      |
| PD7215            | AXIN2 | cna | gain    | BASIS      |
| PD8621            | AXIN2 | cna | gain    | BASIS      |
| PD8980            | AXIN2 | cna | gain    | BASIS      |
| PD9004            | AXIN2 | cna | gain    | BASIS      |
| PD9702            | AXIN2 | cna | gain    | BASIS      |
| TCGA-AO-A0JL      | BRCA2 | cna | hetloss | TCGA       |
| TCGA-BH-A0AW      | BRCA2 | cna | hetloss | TCGA       |
| TCGA-BH-A0C0      | BRCA2 | cna | gain    | TCGA       |
| TCGA-BH-A1FU      | BRCA2 | cna | hetloss | TCGA       |
| TCGA-C8-A12L      | BRCA2 | cna | hetloss | TCGA       |
| TCGA-D8-A27M      | BRCA2 | cna | hetloss | TCGA       |
| TCGA-E9-A1NC      | BRCA2 | cna | hetloss | TCGA       |
| TCGA-EW-A10X      | BRCA2 | cna | homdel  | TCGA       |
| TCGA-LL-A5YP      | BRCA2 | cna | hetloss | TCGA       |
| MB-0346           | BRCA2 | cna | hetloss | METABRIC   |
| MB-2827           | BRCA2 | cna | hetloss | METABRIC   |
| MB-5465           | BRCA2 | cna | gain    | METABRIC   |
| MB-6060           | BRCA2 | cna | gain    | METABRIC   |
| MB-6098           | BRCA2 | cna | hetloss | METABRIC   |

|              |       |     |         |          |
|--------------|-------|-----|---------|----------|
| MB-7032      | BRCA2 | cna | hetloss | METABRIC |
| MB-0420      | BRCA2 | cna | hetloss | METABRIC |
| MTS-T0064    | BRCA2 | cna | hetloss | METABRIC |
| PD10014      | BRCA2 | cna | hetloss | BASIS    |
| PD11742      | BRCA2 | cna | hetloss | BASIS    |
| PD13296      | BRCA2 | cna | hetloss | BASIS    |
| PD13297      | BRCA2 | cna | hetloss | BASIS    |
| PD13771      | BRCA2 | cna | hetloss | BASIS    |
| PD14442      | BRCA2 | cna | hetloss | BASIS    |
| PD22355      | BRCA2 | cna | hetloss | BASIS    |
| PD23562      | BRCA2 | cna | gain    | BASIS    |
| PD23578      | BRCA2 | cna | hetloss | BASIS    |
| PD24202      | BRCA2 | cna | hetloss | BASIS    |
| PD24206      | BRCA2 | cna | gain    | BASIS    |
| PD3890       | BRCA2 | cna | hetloss | BASIS    |
| PD3905       | BRCA2 | cna | gain    | BASIS    |
| PD4005       | BRCA2 | cna | homdel  | BASIS    |
| PD4006       | BRCA2 | cna | hetloss | BASIS    |
| PD4107       | BRCA2 | cna | gain    | BASIS    |
| PD4826       | BRCA2 | cna | hetloss | BASIS    |
| PD4967       | BRCA2 | cna | hetloss | BASIS    |
| PD5945       | BRCA2 | cna | amp     | BASIS    |
| PD5948       | BRCA2 | cna | gain    | BASIS    |
| PD6406       | BRCA2 | cna | hetloss | BASIS    |
| PD6413       | BRCA2 | cna | hetloss | BASIS    |
| PD6731       | BRCA2 | cna | hetloss | BASIS    |
| PD7067       | BRCA2 | cna | gain    | BASIS    |
| PD7215       | BRCA2 | cna | gain    | BASIS    |
| PD8980       | BRCA2 | cna | hetloss | BASIS    |
| PD9585       | BRCA2 | cna | gain    | BASIS    |
| PD9702       | BRCA2 | cna | gain    | BASIS    |
| TCGA-A2-A25B | CD79B | cna | amp     | TCGA     |
| TCGA-AN-A0XU | CD79B | cna | gain    | TCGA     |
| TCGA-AO-A0JL | CD79B | cna | hetloss | TCGA     |
| TCGA-BH-A0AW | CD79B | cna | amp     | TCGA     |
| TCGA-BH-A0C0 | CD79B | cna | gain    | TCGA     |
| TCGA-C8-A12L | CD79B | cna | gain    | TCGA     |
| TCGA-D8-A27M | CD79B | cna | hetloss | TCGA     |
| TCGA-EW-A10X | CD79B | cna | amp     | TCGA     |
| TCGA-LL-A5YP | CD79B | cna | amp     | TCGA     |
| MB-0346      | CD79B | cna | gain    | METABRIC |
| MB-2827      | CD79B | cna | hetloss | METABRIC |
| MB-5070      | CD79B | cna | gain    | METABRIC |
| MB-5107      | CD79B | cna | amp     | METABRIC |
| MB-5323      | CD79B | cna | gain    | METABRIC |
| MB-6060      | CD79B | cna | gain    | METABRIC |
| MB-6098      | CD79B | cna | gain    | METABRIC |

|                   |        |     |         |            |
|-------------------|--------|-----|---------|------------|
| MB-6271           | CD79B  | cna | hetloss | METABRIC   |
| MB-7048           | CD79B  | cna | amp     | METABRIC   |
| MTS-T0064         | CD79B  | cna | gain    | METABRIC   |
| P-0002858-T01-IM3 | CD79B  | cna | amp     | MSK-IMPACT |
| PD11327           | CD79B  | cna | gain    | BASIS      |
| PD11742           | CD79B  | cna | gain    | BASIS      |
| PD22355           | CD79B  | cna | gain    | BASIS      |
| PD23561           | CD79B  | cna | gain    | BASIS      |
| PD23562           | CD79B  | cna | gain    | BASIS      |
| PD23574           | CD79B  | cna | gain    | BASIS      |
| PD24186           | CD79B  | cna | gain    | BASIS      |
| PD24206           | CD79B  | cna | hetloss | BASIS      |
| PD24337           | CD79B  | cna | hetloss | BASIS      |
| PD3890            | CD79B  | cna | gain    | BASIS      |
| PD3905            | CD79B  | cna | gain    | BASIS      |
| PD4006            | CD79B  | cna | amp     | BASIS      |
| PD4826            | CD79B  | cna | gain    | BASIS      |
| PD4967            | CD79B  | cna | homdel  | BASIS      |
| PD5930            | CD79B  | cna | gain    | BASIS      |
| PD5935            | CD79B  | cna | gain    | BASIS      |
| PD5945            | CD79B  | cna | amp     | BASIS      |
| PD5948            | CD79B  | cna | gain    | BASIS      |
| PD6731            | CD79B  | cna | hetloss | BASIS      |
| PD7067            | CD79B  | cna | gain    | BASIS      |
| PD7215            | CD79B  | cna | gain    | BASIS      |
| PD8621            | CD79B  | cna | gain    | BASIS      |
| PD8980            | CD79B  | cna | gain    | BASIS      |
| PD9004            | CD79B  | cna | gain    | BASIS      |
| PD9702            | CD79B  | cna | gain    | BASIS      |
| TCGA-A2-A25B      | COL1A1 | cna | amp     | TCGA       |
| TCGA-AN-A0XU      | COL1A1 | cna | hetloss | TCGA       |
| TCGA-AO-A0JL      | COL1A1 | cna | hetloss | TCGA       |
| TCGA-BH-A0AW      | COL1A1 | cna | amp     | TCGA       |
| TCGA-BH-A0C0      | COL1A1 | cna | gain    | TCGA       |
| TCGA-BH-A18R      | COL1A1 | cna | amp     | TCGA       |
| TCGA-BH-A1FU      | COL1A1 | cna | homdel  | TCGA       |
| TCGA-C8-A12L      | COL1A1 | cna | amp     | TCGA       |
| TCGA-D8-A27M      | COL1A1 | cna | hetloss | TCGA       |
| TCGA-E9-A1NC      | COL1A1 | cna | hetloss | TCGA       |
| TCGA-EW-A10X      | COL1A1 | cna | amp     | TCGA       |
| MB-0346           | COL1A1 | cna | gain    | METABRIC   |
| MB-2827           | COL1A1 | cna | hetloss | METABRIC   |
| MB-5070           | COL1A1 | cna | hetloss | METABRIC   |
| MB-5107           | COL1A1 | cna | amp     | METABRIC   |
| MB-6060           | COL1A1 | cna | amp     | METABRIC   |
| MB-6098           | COL1A1 | cna | hetloss | METABRIC   |
| MB-6271           | COL1A1 | cna | hetloss | METABRIC   |



|              |        |     |         |          |
|--------------|--------|-----|---------|----------|
| MB-7048      | COL1A1 | cna | gain    | METABRIC |
| PD11327      | COL1A1 | cna | gain    | BASIS    |
| PD11742      | COL1A1 | cna | gain    | BASIS    |
| PD13296      | COL1A1 | cna | gain    | BASIS    |
| PD13297      | COL1A1 | cna | hetloss | BASIS    |
| PD13299      | COL1A1 | cna | gain    | BASIS    |
| PD13771      | COL1A1 | cna | gain    | BASIS    |
| PD23561      | COL1A1 | cna | amp     | BASIS    |
| PD23562      | COL1A1 | cna | gain    | BASIS    |
| PD23574      | COL1A1 | cna | gain    | BASIS    |
| PD24186      | COL1A1 | cna | gain    | BASIS    |
| PD24206      | COL1A1 | cna | hetloss | BASIS    |
| PD24337      | COL1A1 | cna | hetloss | BASIS    |
| PD3890       | COL1A1 | cna | hetloss | BASIS    |
| PD3905       | COL1A1 | cna | gain    | BASIS    |
| PD4005       | COL1A1 | cna | gain    | BASIS    |
| PD4006       | COL1A1 | cna | amp     | BASIS    |
| PD4826       | COL1A1 | cna | gain    | BASIS    |
| PD4967       | COL1A1 | cna | hetloss | BASIS    |
| PD5945       | COL1A1 | cna | amp     | BASIS    |
| PD5948       | COL1A1 | cna | gain    | BASIS    |
| PD6406       | COL1A1 | cna | hetloss | BASIS    |
| PD6731       | COL1A1 | cna | hetloss | BASIS    |
| PD7067       | COL1A1 | cna | gain    | BASIS    |
| PD7215       | COL1A1 | cna | gain    | BASIS    |
| PD9004       | COL1A1 | cna | gain    | BASIS    |
| PD9702       | COL1A1 | cna | gain    | BASIS    |
| TCGA-A2-A25B | ETV4   | cna | hetloss | TCGA     |
| TCGA-AN-A0XU | ETV4   | cna | hetloss | TCGA     |
| TCGA-AO-A0JL | ETV4   | cna | homdel  | TCGA     |
| TCGA-BH-A0AW | ETV4   | cna | homdel  | TCGA     |
| TCGA-BH-A0C0 | ETV4   | cna | gain    | TCGA     |
| TCGA-BH-A18R | ETV4   | cna | homdel  | TCGA     |
| TCGA-BH-A1FU | ETV4   | cna | homdel  | TCGA     |
| TCGA-C8-A12L | ETV4   | cna | hetloss | TCGA     |
| TCGA-D8-A27M | ETV4   | cna | hetloss | TCGA     |
| TCGA-E2-A1L7 | ETV4   | cna | hetloss | TCGA     |
| TCGA-E9-A1NC | ETV4   | cna | hetloss | TCGA     |
| TCGA-EW-A10X | ETV4   | cna | homdel  | TCGA     |
| MB-0346      | ETV4   | cna | hetloss | METABRIC |
| MB-2827      | ETV4   | cna | hetloss | METABRIC |
| MB-5070      | ETV4   | cna | hetloss | METABRIC |
| MB-5465      | ETV4   | cna | hetloss | METABRIC |
| MB-6060      | ETV4   | cna | hetloss | METABRIC |
| MB-6098      | ETV4   | cna | hetloss | METABRIC |
| MB-6271      | ETV4   | cna | hetloss | METABRIC |
| MB-7038      | ETV4   | cna | hetloss | METABRIC |

|                   |      |     |         |            |
|-------------------|------|-----|---------|------------|
| MB-7048           | ETV4 | cna | hetloss | METABRIC   |
| PD13296           | ETV4 | cna | gain    | BASIS      |
| PD13297           | ETV4 | cna | hetloss | BASIS      |
| PD13299           | ETV4 | cna | gain    | BASIS      |
| PD13771           | ETV4 | cna | hetloss | BASIS      |
| PD23561           | ETV4 | cna | hetloss | BASIS      |
| PD23562           | ETV4 | cna | gain    | BASIS      |
| PD23574           | ETV4 | cna | gain    | BASIS      |
| PD24186           | ETV4 | cna | gain    | BASIS      |
| PD24206           | ETV4 | cna | hetloss | BASIS      |
| PD24337           | ETV4 | cna | hetloss | BASIS      |
| PD3890            | ETV4 | cna | hetloss | BASIS      |
| PD3905            | ETV4 | cna | gain    | BASIS      |
| PD4006            | ETV4 | cna | gain    | BASIS      |
| PD4826            | ETV4 | cna | hetloss | BASIS      |
| PD4967            | ETV4 | cna | homdel  | BASIS      |
| PD5945            | ETV4 | cna | amp     | BASIS      |
| PD5948            | ETV4 | cna | gain    | BASIS      |
| PD6406            | ETV4 | cna | hetloss | BASIS      |
| PD6731            | ETV4 | cna | hetloss | BASIS      |
| PD7067            | ETV4 | cna | gain    | BASIS      |
| PD7215            | ETV4 | cna | gain    | BASIS      |
| PD9004            | ETV4 | cna | gain    | BASIS      |
| PD9585            | ETV4 | cna | hetloss | BASIS      |
| PD9702            | ETV4 | cna | amp     | BASIS      |
| TCGA-A2-A25B      | ETV6 | cna | hetloss | TCGA       |
| TCGA-AN-A0XU      | ETV6 | cna | hetloss | TCGA       |
| TCGA-AO-A0JL      | ETV6 | cna | hetloss | TCGA       |
| TCGA-BH-A0C0      | ETV6 | cna | hetloss | TCGA       |
| TCGA-BH-A18R      | ETV6 | cna | gain    | TCGA       |
| TCGA-BH-A1FU      | ETV6 | cna | hetloss | TCGA       |
| TCGA-C8-A12L      | ETV6 | cna | hetloss | TCGA       |
| TCGA-D8-A27M      | ETV6 | cna | amp     | TCGA       |
| TCGA-LL-A5YP      | ETV6 | cna | hetloss | TCGA       |
| MB-0346           | ETV6 | cna | hetloss | METABRIC   |
| MB-5070           | ETV6 | cna | amp     | METABRIC   |
| MB-5107           | ETV6 | cna | hetloss | METABRIC   |
| MB-6060           | ETV6 | cna | gain    | METABRIC   |
| MB-6098           | ETV6 | cna | gain    | METABRIC   |
| MB-7038           | ETV6 | cna | hetloss | METABRIC   |
| MB-7048           | ETV6 | cna | gain    | METABRIC   |
| P-0009557-T01-IM5 | ETV6 | cna | homdel  | MSK-IMPACT |
| P-0011369-T01-IM5 | ETV6 | cna | homdel  | MSK-IMPACT |
| PD10014           | ETV6 | cna | hetloss | BASIS      |
| PD11327           | ETV6 | cna | gain    | BASIS      |
| PD11742           | ETV6 | cna | gain    | BASIS      |
| PD13296           | ETV6 | cna | hetloss | BASIS      |

|                   |      |     |         |            |
|-------------------|------|-----|---------|------------|
| PD13297           | ETV6 | cna | hetloss | BASIS      |
| PD13299           | ETV6 | cna | gain    | BASIS      |
| PD13771           | ETV6 | cna | hetloss | BASIS      |
| PD23574           | ETV6 | cna | gain    | BASIS      |
| PD23578           | ETV6 | cna | gain    | BASIS      |
| PD24186           | ETV6 | cna | gain    | BASIS      |
| PD24202           | ETV6 | cna | hetloss | BASIS      |
| PD3905            | ETV6 | cna | gain    | BASIS      |
| PD4005            | ETV6 | cna | hetloss | BASIS      |
| PD4006            | ETV6 | cna | gain    | BASIS      |
| PD4107            | ETV6 | cna | gain    | BASIS      |
| PD4826            | ETV6 | cna | hetloss | BASIS      |
| PD4967            | ETV6 | cna | hetloss | BASIS      |
| PD5930            | ETV6 | cna | gain    | BASIS      |
| PD5935            | ETV6 | cna | gain    | BASIS      |
| PD5945            | ETV6 | cna | amp     | BASIS      |
| PD6406            | ETV6 | cna | amp     | BASIS      |
| PD6731            | ETV6 | cna | hetloss | BASIS      |
| PD7215            | ETV6 | cna | gain    | BASIS      |
| PD8621            | ETV6 | cna | gain    | BASIS      |
| PD8980            | ETV6 | cna | hetloss | BASIS      |
| PD9004            | ETV6 | cna | gain    | BASIS      |
| PD9702            | ETV6 | cna | gain    | BASIS      |
| TCGA-A2-A25B      | GNAS | cna | gain    | TCGA       |
| TCGA-AN-A0XU      | GNAS | cna | gain    | TCGA       |
| TCGA-AO-A0JL      | GNAS | cna | gain    | TCGA       |
| TCGA-BH-A0AW      | GNAS | cna | gain    | TCGA       |
| TCGA-BH-A0C0      | GNAS | cna | gain    | TCGA       |
| TCGA-BH-A18R      | GNAS | cna | gain    | TCGA       |
| TCGA-C8-A12L      | GNAS | cna | gain    | TCGA       |
| TCGA-D8-A27M      | GNAS | cna | hetloss | TCGA       |
| TCGA-E2-A1L7      | GNAS | cna | gain    | TCGA       |
| TCGA-E9-A1NC      | GNAS | cna | gain    | TCGA       |
| TCGA-LL-A5YP      | GNAS | cna | gain    | TCGA       |
| MB-0346           | GNAS | cna | gain    | METABRIC   |
| MB-2827           | GNAS | cna | amp     | METABRIC   |
| MB-5070           | GNAS | cna | hetloss | METABRIC   |
| MB-5107           | GNAS | cna | gain    | METABRIC   |
| MB-6060           | GNAS | cna | gain    | METABRIC   |
| MB-6098           | GNAS | cna | hetloss | METABRIC   |
| P-0002858-T01-IM3 | GNAS | cna | amp     | MSK-IMPACT |
| PD11327           | GNAS | cna | gain    | BASIS      |
| PD13296           | GNAS | cna | gain    | BASIS      |
| PD13297           | GNAS | cna | hetloss | BASIS      |
| PD13299           | GNAS | cna | gain    | BASIS      |
| PD13771           | GNAS | cna | gain    | BASIS      |
| PD22355           | GNAS | cna | gain    | BASIS      |

|              |      |     |         |          |
|--------------|------|-----|---------|----------|
| PD23562      | GNAS | cna | gain    | BASIS    |
| PD23574      | GNAS | cna | gain    | BASIS    |
| PD23578      | GNAS | cna | hetloss | BASIS    |
| PD24186      | GNAS | cna | gain    | BASIS    |
| PD24202      | GNAS | cna | hetloss | BASIS    |
| PD24206      | GNAS | cna | amp     | BASIS    |
| PD3905       | GNAS | cna | gain    | BASIS    |
| PD4005       | GNAS | cna | hetloss | BASIS    |
| PD4006       | GNAS | cna | gain    | BASIS    |
| PD4826       | GNAS | cna | gain    | BASIS    |
| PD5935       | GNAS | cna | gain    | BASIS    |
| PD5945       | GNAS | cna | amp     | BASIS    |
| PD5948       | GNAS | cna | gain    | BASIS    |
| PD6406       | GNAS | cna | gain    | BASIS    |
| PD7067       | GNAS | cna | gain    | BASIS    |
| PD7215       | GNAS | cna | amp     | BASIS    |
| PD8621       | GNAS | cna | gain    | BASIS    |
| PD8980       | GNAS | cna | gain    | BASIS    |
| PD9004       | GNAS | cna | gain    | BASIS    |
| PD9585       | GNAS | cna | hetloss | BASIS    |
| PD9702       | GNAS | cna | gain    | BASIS    |
| TCGA-A2-A25B | HEY1 | cna | gain    | TCGA     |
| TCGA-AN-A0XU | HEY1 | cna | hetloss | TCGA     |
| TCGA-AO-A0JL | HEY1 | cna | amp     | TCGA     |
| TCGA-BH-A0AW | HEY1 | cna | gain    | TCGA     |
| TCGA-BH-A0C0 | HEY1 | cna | amp     | TCGA     |
| TCGA-BH-A18R | HEY1 | cna | homdel  | TCGA     |
| TCGA-BH-A1FU | HEY1 | cna | gain    | TCGA     |
| TCGA-C8-A12L | HEY1 | cna | hetloss | TCGA     |
| TCGA-D8-A27M | HEY1 | cna | amp     | TCGA     |
| TCGA-E2-A1L7 | HEY1 | cna | gain    | TCGA     |
| TCGA-LL-A5YP | HEY1 | cna | amp     | TCGA     |
| MB-0346      | HEY1 | cna | gain    | METABRIC |
| MB-2827      | HEY1 | cna | amp     | METABRIC |
| MB-5107      | HEY1 | cna | gain    | METABRIC |
| MB-5465      | HEY1 | cna | hetloss | METABRIC |
| MB-6060      | HEY1 | cna | amp     | METABRIC |
| MB-6098      | HEY1 | cna | amp     | METABRIC |
| MB-7038      | HEY1 | cna | gain    | METABRIC |
| MB-7048      | HEY1 | cna | amp     | METABRIC |
| MB-0420      | HEY1 | cna | gain    | METABRIC |
| PD10014      | HEY1 | cna | amp     | BASIS    |
| PD11327      | HEY1 | cna | amp     | BASIS    |
| PD13296      | HEY1 | cna | hetloss | BASIS    |
| PD13299      | HEY1 | cna | gain    | BASIS    |
| PD13771      | HEY1 | cna | gain    | BASIS    |
| PD23562      | HEY1 | cna | gain    | BASIS    |

|              |      |     |         |          |
|--------------|------|-----|---------|----------|
| PD23574      | HEY1 | cna | gain    | BASIS    |
| PD24186      | HEY1 | cna | gain    | BASIS    |
| PD24206      | HEY1 | cna | amp     | BASIS    |
| PD3890       | HEY1 | cna | gain    | BASIS    |
| PD3905       | HEY1 | cna | gain    | BASIS    |
| PD4005       | HEY1 | cna | hetloss | BASIS    |
| PD4006       | HEY1 | cna | gain    | BASIS    |
| PD4826       | HEY1 | cna | amp     | BASIS    |
| PD5935       | HEY1 | cna | gain    | BASIS    |
| PD5945       | HEY1 | cna | gain    | BASIS    |
| PD5948       | HEY1 | cna | amp     | BASIS    |
| PD6406       | HEY1 | cna | gain    | BASIS    |
| PD6413       | HEY1 | cna | gain    | BASIS    |
| PD7067       | HEY1 | cna | amp     | BASIS    |
| PD7215       | HEY1 | cna | amp     | BASIS    |
| PD8621       | HEY1 | cna | gain    | BASIS    |
| PD8980       | HEY1 | cna | gain    | BASIS    |
| PD9004       | HEY1 | cna | gain    | BASIS    |
| PD9702       | HEY1 | cna | gain    | BASIS    |
| TCGA-A2-A25B | HLF  | cna | amp     | TCGA     |
| TCGA-AN-A0XU | HLF  | cna | hetloss | TCGA     |
| TCGA-AO-A0JL | HLF  | cna | hetloss | TCGA     |
| TCGA-BH-A0AW | HLF  | cna | amp     | TCGA     |
| TCGA-BH-A0C0 | HLF  | cna | gain    | TCGA     |
| TCGA-BH-A18R | HLF  | cna | amp     | TCGA     |
| TCGA-C8-A12L | HLF  | cna | gain    | TCGA     |
| TCGA-D8-A27M | HLF  | cna | gain    | TCGA     |
| TCGA-EW-A10X | HLF  | cna | amp     | TCGA     |
| MB-0346      | HLF  | cna | gain    | METABRIC |
| MB-2827      | HLF  | cna | hetloss | METABRIC |
| MB-5070      | HLF  | cna | hetloss | METABRIC |
| MB-5107      | HLF  | cna | amp     | METABRIC |
| MB-5323      | HLF  | cna | gain    | METABRIC |
| MB-6060      | HLF  | cna | hetloss | METABRIC |
| MB-6098      | HLF  | cna | hetloss | METABRIC |
| MB-6271      | HLF  | cna | hetloss | METABRIC |
| MB-7048      | HLF  | cna | hetloss | METABRIC |
| PD11327      | HLF  | cna | amp     | BASIS    |
| PD11742      | HLF  | cna | gain    | BASIS    |
| PD13296      | HLF  | cna | gain    | BASIS    |
| PD13297      | HLF  | cna | hetloss | BASIS    |
| PD13299      | HLF  | cna | gain    | BASIS    |
| PD22355      | HLF  | cna | gain    | BASIS    |
| PD23561      | HLF  | cna | gain    | BASIS    |
| PD23562      | HLF  | cna | gain    | BASIS    |
| PD23574      | HLF  | cna | gain    | BASIS    |
| PD24186      | HLF  | cna | gain    | BASIS    |

|              |       |     |         |          |
|--------------|-------|-----|---------|----------|
| PD24337      | HLF   | cna | hetloss | BASIS    |
| PD3890       | HLF   | cna | hetloss | BASIS    |
| PD3905       | HLF   | cna | gain    | BASIS    |
| PD4006       | HLF   | cna | gain    | BASIS    |
| PD4107       | HLF   | cna | hetloss | BASIS    |
| PD4826       | HLF   | cna | gain    | BASIS    |
| PD4967       | HLF   | cna | hetloss | BASIS    |
| PD5930       | HLF   | cna | gain    | BASIS    |
| PD5945       | HLF   | cna | amp     | BASIS    |
| PD5948       | HLF   | cna | gain    | BASIS    |
| PD6406       | HLF   | cna | hetloss | BASIS    |
| PD6731       | HLF   | cna | hetloss | BASIS    |
| PD7067       | HLF   | cna | gain    | BASIS    |
| PD7215       | HLF   | cna | gain    | BASIS    |
| PD8980       | HLF   | cna | gain    | BASIS    |
| PD9004       | HLF   | cna | gain    | BASIS    |
| PD9702       | HLF   | cna | gain    | BASIS    |
| TCGA-A2-A25B | IKBKE | cna | amp     | TCGA     |
| TCGA-AN-A0XU | IKBKE | cna | hetloss | TCGA     |
| TCGA-AO-A0JL | IKBKE | cna | gain    | TCGA     |
| TCGA-BH-A0AW | IKBKE | cna | gain    | TCGA     |
| TCGA-BH-A0C0 | IKBKE | cna | gain    | TCGA     |
| TCGA-BH-A18R | IKBKE | cna | amp     | TCGA     |
| TCGA-BH-A1FU | IKBKE | cna | gain    | TCGA     |
| TCGA-C8-A12L | IKBKE | cna | gain    | TCGA     |
| TCGA-E2-A1L7 | IKBKE | cna | gain    | TCGA     |
| TCGA-E9-A1NC | IKBKE | cna | gain    | TCGA     |
| TCGA-EW-A10X | IKBKE | cna | gain    | TCGA     |
| TCGA-LL-A5YP | IKBKE | cna | hetloss | TCGA     |
| MB-0346      | IKBKE | cna | gain    | METABRIC |
| MB-5107      | IKBKE | cna | gain    | METABRIC |
| MB-5465      | IKBKE | cna | gain    | METABRIC |
| MB-6098      | IKBKE | cna | gain    | METABRIC |
| MB-7032      | IKBKE | cna | gain    | METABRIC |
| MB-7048      | IKBKE | cna | gain    | METABRIC |
| MB-0420      | IKBKE | cna | gain    | METABRIC |
| PD10014      | IKBKE | cna | gain    | BASIS    |
| PD11742      | IKBKE | cna | gain    | BASIS    |
| PD13296      | IKBKE | cna | hetloss | BASIS    |
| PD13299      | IKBKE | cna | gain    | BASIS    |
| PD14442      | IKBKE | cna | gain    | BASIS    |
| PD23562      | IKBKE | cna | gain    | BASIS    |
| PD23574      | IKBKE | cna | gain    | BASIS    |
| PD24186      | IKBKE | cna | amp     | BASIS    |
| PD24206      | IKBKE | cna | gain    | BASIS    |
| PD24337      | IKBKE | cna | gain    | BASIS    |
| PD3890       | IKBKE | cna | gain    | BASIS    |

|              |       |     |         |          |
|--------------|-------|-----|---------|----------|
| PD3905       | IKBKE | cna | gain    | BASIS    |
| PD4005       | IKBKE | cna | gain    | BASIS    |
| PD4006       | IKBKE | cna | amp     | BASIS    |
| PD4107       | IKBKE | cna | gain    | BASIS    |
| PD4826       | IKBKE | cna | gain    | BASIS    |
| PD5935       | IKBKE | cna | gain    | BASIS    |
| PD5945       | IKBKE | cna | amp     | BASIS    |
| PD5948       | IKBKE | cna | amp     | BASIS    |
| PD6413       | IKBKE | cna | gain    | BASIS    |
| PD7067       | IKBKE | cna | gain    | BASIS    |
| PD7215       | IKBKE | cna | amp     | BASIS    |
| PD8621       | IKBKE | cna | gain    | BASIS    |
| PD8980       | IKBKE | cna | amp     | BASIS    |
| PD9004       | IKBKE | cna | gain    | BASIS    |
| PD9702       | IKBKE | cna | amp     | BASIS    |
| TCGA-A2-A25B | IL10  | cna | amp     | TCGA     |
| TCGA-AN-A0XU | IL10  | cna | hetloss | TCGA     |
| TCGA-AO-A0JL | IL10  | cna | gain    | TCGA     |
| TCGA-BH-A0AW | IL10  | cna | gain    | TCGA     |
| TCGA-BH-A0C0 | IL10  | cna | gain    | TCGA     |
| TCGA-BH-A18R | IL10  | cna | amp     | TCGA     |
| TCGA-BH-A1FU | IL10  | cna | gain    | TCGA     |
| TCGA-C8-A12L | IL10  | cna | hetloss | TCGA     |
| TCGA-E2-A1L7 | IL10  | cna | gain    | TCGA     |
| TCGA-E9-A1NC | IL10  | cna | gain    | TCGA     |
| TCGA-EW-A10X | IL10  | cna | gain    | TCGA     |
| TCGA-LL-A5YP | IL10  | cna | hetloss | TCGA     |
| MB-0346      | IL10  | cna | gain    | METABRIC |
| MB-5107      | IL10  | cna | gain    | METABRIC |
| MB-5465      | IL10  | cna | gain    | METABRIC |
| MB-6098      | IL10  | cna | gain    | METABRIC |
| MB-7032      | IL10  | cna | gain    | METABRIC |
| MB-7048      | IL10  | cna | gain    | METABRIC |
| MB-0420      | IL10  | cna | gain    | METABRIC |
| PD10014      | IL10  | cna | gain    | BASIS    |
| PD11742      | IL10  | cna | gain    | BASIS    |
| PD13296      | IL10  | cna | hetloss | BASIS    |
| PD13299      | IL10  | cna | gain    | BASIS    |
| PD14442      | IL10  | cna | gain    | BASIS    |
| PD23562      | IL10  | cna | gain    | BASIS    |
| PD23574      | IL10  | cna | gain    | BASIS    |
| PD24186      | IL10  | cna | amp     | BASIS    |
| PD24206      | IL10  | cna | gain    | BASIS    |
| PD24337      | IL10  | cna | gain    | BASIS    |
| PD3890       | IL10  | cna | gain    | BASIS    |
| PD3905       | IL10  | cna | gain    | BASIS    |
| PD4005       | IL10  | cna | gain    | BASIS    |

|              |      |     |         |          |
|--------------|------|-----|---------|----------|
| PD4006       | IL10 | cna | amp     | BASIS    |
| PD4107       | IL10 | cna | gain    | BASIS    |
| PD4826       | IL10 | cna | gain    | BASIS    |
| PD5935       | IL10 | cna | gain    | BASIS    |
| PD5945       | IL10 | cna | amp     | BASIS    |
| PD5948       | IL10 | cna | amp     | BASIS    |
| PD6413       | IL10 | cna | gain    | BASIS    |
| PD7067       | IL10 | cna | gain    | BASIS    |
| PD7215       | IL10 | cna | amp     | BASIS    |
| PD8621       | IL10 | cna | gain    | BASIS    |
| PD8980       | IL10 | cna | amp     | BASIS    |
| PD9004       | IL10 | cna | gain    | BASIS    |
| PD9702       | IL10 | cna | amp     | BASIS    |
| TCGA-A2-A25B | MSH3 | cna | hetloss | TCGA     |
| TCGA-AN-A0XU | MSH3 | cna | hetloss | TCGA     |
| TCGA-AO-A0JL | MSH3 | cna | hetloss | TCGA     |
| TCGA-BH-A0C0 | MSH3 | cna | hetloss | TCGA     |
| TCGA-BH-A1FU | MSH3 | cna | hetloss | TCGA     |
| TCGA-C8-A12L | MSH3 | cna | hetloss | TCGA     |
| TCGA-D8-A27M | MSH3 | cna | hetloss | TCGA     |
| TCGA-E2-A1L7 | MSH3 | cna | hetloss | TCGA     |
| TCGA-E9-A1NC | MSH3 | cna | hetloss | TCGA     |
| TCGA-LL-A5YP | MSH3 | cna | hetloss | TCGA     |
| MB-0346      | MSH3 | cna | gain    | METABRIC |
| MB-2827      | MSH3 | cna | hetloss | METABRIC |
| MB-5070      | MSH3 | cna | hetloss | METABRIC |
| MB-5107      | MSH3 | cna | hetloss | METABRIC |
| MB-5465      | MSH3 | cna | hetloss | METABRIC |
| MB-6098      | MSH3 | cna | hetloss | METABRIC |
| MB-0420      | MSH3 | cna | hetloss | METABRIC |
| MTS-T0064    | MSH3 | cna | hetloss | METABRIC |
| PD10014      | MSH3 | cna | hetloss | BASIS    |
| PD11327      | MSH3 | cna | hetloss | BASIS    |
| PD11742      | MSH3 | cna | hetloss | BASIS    |
| PD13296      | MSH3 | cna | hetloss | BASIS    |
| PD13297      | MSH3 | cna | hetloss | BASIS    |
| PD13299      | MSH3 | cna | hetloss | BASIS    |
| PD13771      | MSH3 | cna | gain    | BASIS    |
| PD22355      | MSH3 | cna | hetloss | BASIS    |
| PD23562      | MSH3 | cna | hetloss | BASIS    |
| PD24202      | MSH3 | cna | hetloss | BASIS    |
| PD24206      | MSH3 | cna | gain    | BASIS    |
| PD24337      | MSH3 | cna | hetloss | BASIS    |
| PD3890       | MSH3 | cna | hetloss | BASIS    |
| PD3905       | MSH3 | cna | gain    | BASIS    |
| PD4005       | MSH3 | cna | hetloss | BASIS    |
| PD4107       | MSH3 | cna | hetloss | BASIS    |



|              |      |     |         |          |
|--------------|------|-----|---------|----------|
| PD4967       | MSH3 | cna | hetloss | BASIS    |
| PD5930       | MSH3 | cna | hetloss | BASIS    |
| PD5935       | MSH3 | cna | hetloss | BASIS    |
| PD5948       | MSH3 | cna | hetloss | BASIS    |
| PD6406       | MSH3 | cna | hetloss | BASIS    |
| PD6413       | MSH3 | cna | hetloss | BASIS    |
| PD6731       | MSH3 | cna | hetloss | BASIS    |
| PD7067       | MSH3 | cna | gain    | BASIS    |
| PD7215       | MSH3 | cna | hetloss | BASIS    |
| PD8621       | MSH3 | cna | hetloss | BASIS    |
| PD9585       | MSH3 | cna | hetloss | BASIS    |
| TCGA-A2-A25B | MUC1 | cna | gain    | TCGA     |
| TCGA-AN-A0XU | MUC1 | cna | gain    | TCGA     |
| TCGA-AO-A0JL | MUC1 | cna | gain    | TCGA     |
| TCGA-BH-A0AW | MUC1 | cna | gain    | TCGA     |
| TCGA-BH-A0C0 | MUC1 | cna | hetloss | TCGA     |
| TCGA-BH-A18R | MUC1 | cna | gain    | TCGA     |
| TCGA-BH-A1FU | MUC1 | cna | gain    | TCGA     |
| TCGA-C8-A12L | MUC1 | cna | gain    | TCGA     |
| TCGA-E2-A1L7 | MUC1 | cna | gain    | TCGA     |
| TCGA-EW-A10X | MUC1 | cna | gain    | TCGA     |
| TCGA-LL-A5YP | MUC1 | cna | amp     | TCGA     |
| MB-2827      | MUC1 | cna | amp     | METABRIC |
| MB-5070      | MUC1 | cna | gain    | METABRIC |
| MB-6060      | MUC1 | cna | gain    | METABRIC |
| MB-6098      | MUC1 | cna | amp     | METABRIC |
| MB-7032      | MUC1 | cna | gain    | METABRIC |
| PD10014      | MUC1 | cna | gain    | BASIS    |
| PD11327      | MUC1 | cna | gain    | BASIS    |
| PD13297      | MUC1 | cna | gain    | BASIS    |
| PD13299      | MUC1 | cna | gain    | BASIS    |
| PD13771      | MUC1 | cna | gain    | BASIS    |
| PD14442      | MUC1 | cna | gain    | BASIS    |
| PD22355      | MUC1 | cna | gain    | BASIS    |
| PD23562      | MUC1 | cna | amp     | BASIS    |
| PD23574      | MUC1 | cna | amp     | BASIS    |
| PD24186      | MUC1 | cna | gain    | BASIS    |
| PD24206      | MUC1 | cna | gain    | BASIS    |
| PD3890       | MUC1 | cna | gain    | BASIS    |
| PD3905       | MUC1 | cna | gain    | BASIS    |
| PD4005       | MUC1 | cna | gain    | BASIS    |
| PD4006       | MUC1 | cna | amp     | BASIS    |
| PD4107       | MUC1 | cna | gain    | BASIS    |
| PD4826       | MUC1 | cna | gain    | BASIS    |
| PD5930       | MUC1 | cna | amp     | BASIS    |
| PD5935       | MUC1 | cna | gain    | BASIS    |
| PD5945       | MUC1 | cna | amp     | BASIS    |

|              |      |     |         |          |
|--------------|------|-----|---------|----------|
| PD5948       | MUC1 | cna | gain    | BASIS    |
| PD6406       | MUC1 | cna | gain    | BASIS    |
| PD6413       | MUC1 | cna | gain    | BASIS    |
| PD7067       | MUC1 | cna | amp     | BASIS    |
| PD7215       | MUC1 | cna | gain    | BASIS    |
| PD8621       | MUC1 | cna | amp     | BASIS    |
| PD8980       | MUC1 | cna | gain    | BASIS    |
| PD9004       | MUC1 | cna | amp     | BASIS    |
| PD9702       | MUC1 | cna | amp     | BASIS    |
| TCGA-A2-A25B | PAG1 | cna | gain    | TCGA     |
| TCGA-AN-A0XU | PAG1 | cna | hetloss | TCGA     |
| TCGA-AO-A0JL | PAG1 | cna | amp     | TCGA     |
| TCGA-BH-A0AW | PAG1 | cna | gain    | TCGA     |
| TCGA-BH-A0C0 | PAG1 | cna | amp     | TCGA     |
| TCGA-BH-A18R | PAG1 | cna | homdel  | TCGA     |
| TCGA-BH-A1FU | PAG1 | cna | gain    | TCGA     |
| TCGA-C8-A12L | PAG1 | cna | hetloss | TCGA     |
| TCGA-D8-A27M | PAG1 | cna | amp     | TCGA     |
| TCGA-E2-A1L7 | PAG1 | cna | gain    | TCGA     |
| TCGA-LL-A5YP | PAG1 | cna | amp     | TCGA     |
| MB-0346      | PAG1 | cna | gain    | METABRIC |
| MB-2827      | PAG1 | cna | amp     | METABRIC |
| MB-5107      | PAG1 | cna | gain    | METABRIC |
| MB-5465      | PAG1 | cna | hetloss | METABRIC |
| MB-6098      | PAG1 | cna | amp     | METABRIC |
| MB-7038      | PAG1 | cna | gain    | METABRIC |
| MB-7048      | PAG1 | cna | gain    | METABRIC |
| MB-0420      | PAG1 | cna | gain    | METABRIC |
| PD10014      | PAG1 | cna | amp     | BASIS    |
| PD11327      | PAG1 | cna | amp     | BASIS    |
| PD13296      | PAG1 | cna | hetloss | BASIS    |
| PD13299      | PAG1 | cna | gain    | BASIS    |
| PD13771      | PAG1 | cna | gain    | BASIS    |
| PD23562      | PAG1 | cna | amp     | BASIS    |
| PD23574      | PAG1 | cna | gain    | BASIS    |
| PD24186      | PAG1 | cna | gain    | BASIS    |
| PD24206      | PAG1 | cna | amp     | BASIS    |
| PD3890       | PAG1 | cna | gain    | BASIS    |
| PD3905       | PAG1 | cna | gain    | BASIS    |
| PD4005       | PAG1 | cna | hetloss | BASIS    |
| PD4006       | PAG1 | cna | gain    | BASIS    |
| PD4826       | PAG1 | cna | amp     | BASIS    |
| PD5935       | PAG1 | cna | gain    | BASIS    |
| PD5945       | PAG1 | cna | gain    | BASIS    |
| PD5948       | PAG1 | cna | amp     | BASIS    |
| PD6406       | PAG1 | cna | gain    | BASIS    |
| PD6413       | PAG1 | cna | gain    | BASIS    |

|              |       |     |         |          |
|--------------|-------|-----|---------|----------|
| PD7067       | PAG1  | cna | amp     | BASIS    |
| PD7215       | PAG1  | cna | amp     | BASIS    |
| PD8621       | PAG1  | cna | gain    | BASIS    |
| PD8980       | PAG1  | cna | gain    | BASIS    |
| PD9004       | PAG1  | cna | gain    | BASIS    |
| PD9585       | PAG1  | cna | gain    | BASIS    |
| PD9702       | PAG1  | cna | gain    | BASIS    |
| TCGA-A2-A25B | PRKCI | cna | gain    | TCGA     |
| TCGA-AN-A0XU | PRKCI | cna | gain    | TCGA     |
| TCGA-BH-A0AW | PRKCI | cna | gain    | TCGA     |
| TCGA-BH-A0C0 | PRKCI | cna | gain    | TCGA     |
| TCGA-BH-A18R | PRKCI | cna | amp     | TCGA     |
| TCGA-BH-A1FU | PRKCI | cna | hetloss | TCGA     |
| TCGA-C8-A12L | PRKCI | cna | gain    | TCGA     |
| TCGA-E2-A1L7 | PRKCI | cna | gain    | TCGA     |
| TCGA-LL-A5YP | PRKCI | cna | gain    | TCGA     |
| MB-0346      | PRKCI | cna | gain    | METABRIC |
| MB-2827      | PRKCI | cna | hetloss | METABRIC |
| MB-5070      | PRKCI | cna | amp     | METABRIC |
| MB-5107      | PRKCI | cna | amp     | METABRIC |
| MB-6060      | PRKCI | cna | gain    | METABRIC |
| MB-7038      | PRKCI | cna | hetloss | METABRIC |
| MB-7048      | PRKCI | cna | hetloss | METABRIC |
| MB-0420      | PRKCI | cna | amp     | METABRIC |
| MTS-T0064    | PRKCI | cna | amp     | METABRIC |
| PD11327      | PRKCI | cna | amp     | BASIS    |
| PD13296      | PRKCI | cna | amp     | BASIS    |
| PD13299      | PRKCI | cna | gain    | BASIS    |
| PD13771      | PRKCI | cna | hetloss | BASIS    |
| PD22355      | PRKCI | cna | gain    | BASIS    |
| PD23561      | PRKCI | cna | hetloss | BASIS    |
| PD23562      | PRKCI | cna | amp     | BASIS    |
| PD23574      | PRKCI | cna | gain    | BASIS    |
| PD23578      | PRKCI | cna | gain    | BASIS    |
| PD24186      | PRKCI | cna | amp     | BASIS    |
| PD24202      | PRKCI | cna | gain    | BASIS    |
| PD24206      | PRKCI | cna | gain    | BASIS    |
| PD24337      | PRKCI | cna | gain    | BASIS    |
| PD3905       | PRKCI | cna | gain    | BASIS    |
| PD4005       | PRKCI | cna | gain    | BASIS    |
| PD4107       | PRKCI | cna | gain    | BASIS    |
| PD4826       | PRKCI | cna | gain    | BASIS    |
| PD5930       | PRKCI | cna | gain    | BASIS    |
| PD5935       | PRKCI | cna | amp     | BASIS    |
| PD5945       | PRKCI | cna | amp     | BASIS    |
| PD5948       | PRKCI | cna | amp     | BASIS    |
| PD6406       | PRKCI | cna | gain    | BASIS    |

|              |       |     |         |          |
|--------------|-------|-----|---------|----------|
| PD7067       | PRKCI | cna | gain    | BASIS    |
| PD7215       | PRKCI | cna | gain    | BASIS    |
| PD8621       | PRKCI | cna | gain    | BASIS    |
| PD8980       | PRKCI | cna | gain    | BASIS    |
| PD9702       | PRKCI | cna | amp     | BASIS    |
| TCGA-A2-A25B | PRRX1 | cna | gain    | TCGA     |
| TCGA-AN-A0XU | PRRX1 | cna | gain    | TCGA     |
| TCGA-AO-A0JL | PRRX1 | cna | gain    | TCGA     |
| TCGA-BH-A0AW | PRRX1 | cna | gain    | TCGA     |
| TCGA-BH-A0C0 | PRRX1 | cna | gain    | TCGA     |
| TCGA-BH-A18R | PRRX1 | cna | gain    | TCGA     |
| TCGA-BH-A1FU | PRRX1 | cna | gain    | TCGA     |
| TCGA-C8-A12L | PRRX1 | cna | gain    | TCGA     |
| TCGA-E2-A1L7 | PRRX1 | cna | gain    | TCGA     |
| TCGA-EW-A10X | PRRX1 | cna | gain    | TCGA     |
| TCGA-LL-A5YP | PRRX1 | cna | amp     | TCGA     |
| MB-0346      | PRRX1 | cna | amp     | METABRIC |
| MB-5070      | PRRX1 | cna | gain    | METABRIC |
| MB-5465      | PRRX1 | cna | amp     | METABRIC |
| MB-6098      | PRRX1 | cna | amp     | METABRIC |
| MB-7032      | PRRX1 | cna | gain    | METABRIC |
| MB-7038      | PRRX1 | cna | gain    | METABRIC |
| MB-0420      | PRRX1 | cna | gain    | METABRIC |
| PD10014      | PRRX1 | cna | gain    | BASIS    |
| PD11327      | PRRX1 | cna | gain    | BASIS    |
| PD13297      | PRRX1 | cna | gain    | BASIS    |
| PD13299      | PRRX1 | cna | gain    | BASIS    |
| PD13771      | PRRX1 | cna | hetloss | BASIS    |
| PD14442      | PRRX1 | cna | gain    | BASIS    |
| PD22355      | PRRX1 | cna | gain    | BASIS    |
| PD23562      | PRRX1 | cna | gain    | BASIS    |
| PD23574      | PRRX1 | cna | gain    | BASIS    |
| PD24186      | PRRX1 | cna | amp     | BASIS    |
| PD24206      | PRRX1 | cna | gain    | BASIS    |
| PD24337      | PRRX1 | cna | hetloss | BASIS    |
| PD3905       | PRRX1 | cna | gain    | BASIS    |
| PD4005       | PRRX1 | cna | gain    | BASIS    |
| PD4006       | PRRX1 | cna | gain    | BASIS    |
| PD4107       | PRRX1 | cna | gain    | BASIS    |
| PD4826       | PRRX1 | cna | gain    | BASIS    |
| PD5935       | PRRX1 | cna | gain    | BASIS    |
| PD5945       | PRRX1 | cna | amp     | BASIS    |
| PD5948       | PRRX1 | cna | gain    | BASIS    |
| PD6413       | PRRX1 | cna | gain    | BASIS    |
| PD7067       | PRRX1 | cna | gain    | BASIS    |
| PD7215       | PRRX1 | cna | gain    | BASIS    |
| PD8621       | PRRX1 | cna | gain    | BASIS    |

|              |       |     |         |          |
|--------------|-------|-----|---------|----------|
| PD8980       | PRRX1 | cna | gain    | BASIS    |
| PD9004       | PRRX1 | cna | gain    | BASIS    |
| PD9702       | PRRX1 | cna | gain    | BASIS    |
| TCGA-A2-A25B | SOCS3 | cna | gain    | TCGA     |
| TCGA-AN-A0XU | SOCS3 | cna | amp     | TCGA     |
| TCGA-AO-A0JL | SOCS3 | cna | hetloss | TCGA     |
| TCGA-BH-A0AW | SOCS3 | cna | amp     | TCGA     |
| TCGA-BH-A0C0 | SOCS3 | cna | gain    | TCGA     |
| TCGA-BH-A18R | SOCS3 | cna | amp     | TCGA     |
| TCGA-C8-A12L | SOCS3 | cna | gain    | TCGA     |
| TCGA-D8-A27M | SOCS3 | cna | gain    | TCGA     |
| TCGA-E2-A1L7 | SOCS3 | cna | gain    | TCGA     |
| TCGA-EW-A10X | SOCS3 | cna | amp     | TCGA     |
| TCGA-LL-A5YP | SOCS3 | cna | amp     | TCGA     |
| MB-2827      | SOCS3 | cna | hetloss | METABRIC |
| MB-5070      | SOCS3 | cna | amp     | METABRIC |
| MB-5107      | SOCS3 | cna | amp     | METABRIC |
| MB-6098      | SOCS3 | cna | gain    | METABRIC |
| MB-6271      | SOCS3 | cna | hetloss | METABRIC |
| MB-7048      | SOCS3 | cna | gain    | METABRIC |
| MTS-T0064    | SOCS3 | cna | gain    | METABRIC |
| PD10014      | SOCS3 | cna | gain    | BASIS    |
| PD11327      | SOCS3 | cna | amp     | BASIS    |
| PD22355      | SOCS3 | cna | hetloss | BASIS    |
| PD23561      | SOCS3 | cna | gain    | BASIS    |
| PD23574      | SOCS3 | cna | amp     | BASIS    |
| PD24186      | SOCS3 | cna | amp     | BASIS    |
| PD24202      | SOCS3 | cna | gain    | BASIS    |
| PD24206      | SOCS3 | cna | hetloss | BASIS    |
| PD24337      | SOCS3 | cna | gain    | BASIS    |
| PD3890       | SOCS3 | cna | gain    | BASIS    |
| PD3905       | SOCS3 | cna | gain    | BASIS    |
| PD4006       | SOCS3 | cna | gain    | BASIS    |
| PD4107       | SOCS3 | cna | gain    | BASIS    |
| PD4826       | SOCS3 | cna | amp     | BASIS    |
| PD4967       | SOCS3 | cna | hetloss | BASIS    |
| PD5930       | SOCS3 | cna | gain    | BASIS    |
| PD5935       | SOCS3 | cna | gain    | BASIS    |
| PD5945       | SOCS3 | cna | amp     | BASIS    |
| PD5948       | SOCS3 | cna | gain    | BASIS    |
| PD6413       | SOCS3 | cna | hetloss | BASIS    |
| PD6731       | SOCS3 | cna | hetloss | BASIS    |
| PD7067       | SOCS3 | cna | gain    | BASIS    |
| PD7215       | SOCS3 | cna | gain    | BASIS    |
| PD8621       | SOCS3 | cna | gain    | BASIS    |
| PD9004       | SOCS3 | cna | gain    | BASIS    |
| PD9585       | SOCS3 | cna | gain    | BASIS    |

|              |        |     |         |          |
|--------------|--------|-----|---------|----------|
| PD9702       | SOCS3  | cna | gain    | BASIS    |
| TCGA-A2-A25B | TRAF5  | cna | amp     | TCGA     |
| TCGA-AN-A0XU | TRAF5  | cna | hetloss | TCGA     |
| TCGA-AO-A0JL | TRAF5  | cna | gain    | TCGA     |
| TCGA-BH-A0AW | TRAF5  | cna | gain    | TCGA     |
| TCGA-BH-A0C0 | TRAF5  | cna | gain    | TCGA     |
| TCGA-BH-A18R | TRAF5  | cna | amp     | TCGA     |
| TCGA-BH-A1FU | TRAF5  | cna | gain    | TCGA     |
| TCGA-E2-A1L7 | TRAF5  | cna | gain    | TCGA     |
| TCGA-E9-A1NC | TRAF5  | cna | gain    | TCGA     |
| TCGA-EW-A10X | TRAF5  | cna | gain    | TCGA     |
| TCGA-LL-A5YP | TRAF5  | cna | hetloss | TCGA     |
| MB-0346      | TRAF5  | cna | gain    | METABRIC |
| MB-5107      | TRAF5  | cna | gain    | METABRIC |
| MB-5465      | TRAF5  | cna | gain    | METABRIC |
| MB-6098      | TRAF5  | cna | gain    | METABRIC |
| MB-7032      | TRAF5  | cna | gain    | METABRIC |
| MB-7048      | TRAF5  | cna | gain    | METABRIC |
| MB-0420      | TRAF5  | cna | hetloss | METABRIC |
| PD10014      | TRAF5  | cna | gain    | BASIS    |
| PD11327      | TRAF5  | cna | homdel  | BASIS    |
| PD11742      | TRAF5  | cna | gain    | BASIS    |
| PD13296      | TRAF5  | cna | hetloss | BASIS    |
| PD13299      | TRAF5  | cna | gain    | BASIS    |
| PD14442      | TRAF5  | cna | gain    | BASIS    |
| PD23562      | TRAF5  | cna | gain    | BASIS    |
| PD23574      | TRAF5  | cna | gain    | BASIS    |
| PD24186      | TRAF5  | cna | amp     | BASIS    |
| PD24206      | TRAF5  | cna | gain    | BASIS    |
| PD24337      | TRAF5  | cna | gain    | BASIS    |
| PD3890       | TRAF5  | cna | gain    | BASIS    |
| PD3905       | TRAF5  | cna | gain    | BASIS    |
| PD4005       | TRAF5  | cna | gain    | BASIS    |
| PD4006       | TRAF5  | cna | gain    | BASIS    |
| PD4107       | TRAF5  | cna | gain    | BASIS    |
| PD4826       | TRAF5  | cna | gain    | BASIS    |
| PD5935       | TRAF5  | cna | gain    | BASIS    |
| PD5945       | TRAF5  | cna | amp     | BASIS    |
| PD5948       | TRAF5  | cna | amp     | BASIS    |
| PD6413       | TRAF5  | cna | gain    | BASIS    |
| PD7067       | TRAF5  | cna | gain    | BASIS    |
| PD7215       | TRAF5  | cna | amp     | BASIS    |
| PD8621       | TRAF5  | cna | gain    | BASIS    |
| PD8980       | TRAF5  | cna | amp     | BASIS    |
| PD9004       | TRAF5  | cna | gain    | BASIS    |
| PD9702       | TRAF5  | cna | amp     | BASIS    |
| TCGA-A2-A25B | ARFRP1 | cna | gain    | TCGA     |

|              |        |     |         |          |
|--------------|--------|-----|---------|----------|
| TCGA-AN-A0XU | ARFRP1 | cna | gain    | TCGA     |
| TCGA-AO-A0JL | ARFRP1 | cna | gain    | TCGA     |
| TCGA-BH-A0AW | ARFRP1 | cna | gain    | TCGA     |
| TCGA-BH-A18R | ARFRP1 | cna | gain    | TCGA     |
| TCGA-C8-A12L | ARFRP1 | cna | gain    | TCGA     |
| TCGA-D8-A27M | ARFRP1 | cna | hetloss | TCGA     |
| TCGA-E2-A1L7 | ARFRP1 | cna | gain    | TCGA     |
| TCGA-E9-A1NC | ARFRP1 | cna | gain    | TCGA     |
| TCGA-LL-A5YP | ARFRP1 | cna | gain    | TCGA     |
| MB-0346      | ARFRP1 | cna | gain    | METABRIC |
| MB-2827      | ARFRP1 | cna | hetloss | METABRIC |
| MB-5070      | ARFRP1 | cna | hetloss | METABRIC |
| MB-5107      | ARFRP1 | cna | gain    | METABRIC |
| MB-6060      | ARFRP1 | cna | amp     | METABRIC |
| MB-6098      | ARFRP1 | cna | hetloss | METABRIC |
| MTS-T0064    | ARFRP1 | cna | hetloss | METABRIC |
| PD11327      | ARFRP1 | cna | gain    | BASIS    |
| PD11742      | ARFRP1 | cna | gain    | BASIS    |
| PD13296      | ARFRP1 | cna | gain    | BASIS    |
| PD13299      | ARFRP1 | cna | gain    | BASIS    |
| PD13771      | ARFRP1 | cna | gain    | BASIS    |
| PD14442      | ARFRP1 | cna | hetloss | BASIS    |
| PD22355      | ARFRP1 | cna | gain    | BASIS    |
| PD23562      | ARFRP1 | cna | gain    | BASIS    |
| PD23574      | ARFRP1 | cna | gain    | BASIS    |
| PD24186      | ARFRP1 | cna | gain    | BASIS    |
| PD24202      | ARFRP1 | cna | hetloss | BASIS    |
| PD24206      | ARFRP1 | cna | amp     | BASIS    |
| PD3905       | ARFRP1 | cna | gain    | BASIS    |
| PD4005       | ARFRP1 | cna | gain    | BASIS    |
| PD4006       | ARFRP1 | cna | gain    | BASIS    |
| PD4107       | ARFRP1 | cna | gain    | BASIS    |
| PD4826       | ARFRP1 | cna | gain    | BASIS    |
| PD5935       | ARFRP1 | cna | gain    | BASIS    |
| PD5945       | ARFRP1 | cna | amp     | BASIS    |
| PD5948       | ARFRP1 | cna | gain    | BASIS    |
| PD6406       | ARFRP1 | cna | gain    | BASIS    |
| PD7067       | ARFRP1 | cna | gain    | BASIS    |
| PD7215       | ARFRP1 | cna | amp     | BASIS    |
| PD8980       | ARFRP1 | cna | gain    | BASIS    |
| PD9004       | ARFRP1 | cna | gain    | BASIS    |
| PD9585       | ARFRP1 | cna | hetloss | BASIS    |
| PD9702       | ARFRP1 | cna | gain    | BASIS    |
| TCGA-A2-A25B | CCNL1  | cna | gain    | TCGA     |
| TCGA-AN-A0XU | CCNL1  | cna | gain    | TCGA     |
| TCGA-BH-A0AW | CCNL1  | cna | gain    | TCGA     |
| TCGA-BH-A0C0 | CCNL1  | cna | gain    | TCGA     |

|              |       |     |         |          |
|--------------|-------|-----|---------|----------|
| TCGA-BH-A18R | CCNL1 | cna | gain    | TCGA     |
| TCGA-BH-A1FU | CCNL1 | cna | hetloss | TCGA     |
| TCGA-C8-A12L | CCNL1 | cna | amp     | TCGA     |
| TCGA-E2-A1L7 | CCNL1 | cna | gain    | TCGA     |
| TCGA-E9-A1NC | CCNL1 | cna | gain    | TCGA     |
| TCGA-LL-A5YP | CCNL1 | cna | gain    | TCGA     |
| MB-0346      | CCNL1 | cna | gain    | METABRIC |
| MB-5070      | CCNL1 | cna | amp     | METABRIC |
| MB-5107      | CCNL1 | cna | amp     | METABRIC |
| MB-5465      | CCNL1 | cna | amp     | METABRIC |
| MB-6060      | CCNL1 | cna | gain    | METABRIC |
| MB-6098      | CCNL1 | cna | gain    | METABRIC |
| MB-7038      | CCNL1 | cna | hetloss | METABRIC |
| MB-7048      | CCNL1 | cna | hetloss | METABRIC |
| MB-0420      | CCNL1 | cna | amp     | METABRIC |
| PD11327      | CCNL1 | cna | gain    | BASIS    |
| PD13296      | CCNL1 | cna | gain    | BASIS    |
| PD13297      | CCNL1 | cna | gain    | BASIS    |
| PD13299      | CCNL1 | cna | gain    | BASIS    |
| PD13771      | CCNL1 | cna | hetloss | BASIS    |
| PD22355      | CCNL1 | cna | gain    | BASIS    |
| PD23561      | CCNL1 | cna | hetloss | BASIS    |
| PD23562      | CCNL1 | cna | amp     | BASIS    |
| PD23574      | CCNL1 | cna | gain    | BASIS    |
| PD23578      | CCNL1 | cna | gain    | BASIS    |
| PD24186      | CCNL1 | cna | gain    | BASIS    |
| PD24202      | CCNL1 | cna | gain    | BASIS    |
| PD24206      | CCNL1 | cna | gain    | BASIS    |
| PD3905       | CCNL1 | cna | gain    | BASIS    |
| PD4107       | CCNL1 | cna | gain    | BASIS    |
| PD5930       | CCNL1 | cna | gain    | BASIS    |
| PD5935       | CCNL1 | cna | gain    | BASIS    |
| PD5945       | CCNL1 | cna | amp     | BASIS    |
| PD5948       | CCNL1 | cna | gain    | BASIS    |
| PD6731       | CCNL1 | cna | gain    | BASIS    |
| PD7067       | CCNL1 | cna | gain    | BASIS    |
| PD7215       | CCNL1 | cna | gain    | BASIS    |
| PD8621       | CCNL1 | cna | gain    | BASIS    |
| PD8980       | CCNL1 | cna | gain    | BASIS    |
| PD9702       | CCNL1 | cna | amp     | BASIS    |
| TCGA-A2-A25B | DDX5  | cna | amp     | TCGA     |
| TCGA-AN-A0XU | DDX5  | cna | gain    | TCGA     |
| TCGA-AO-A0JL | DDX5  | cna | hetloss | TCGA     |
| TCGA-BH-A0AW | DDX5  | cna | amp     | TCGA     |
| TCGA-BH-A0C0 | DDX5  | cna | gain    | TCGA     |
| TCGA-C8-A12L | DDX5  | cna | gain    | TCGA     |
| TCGA-D8-A27M | DDX5  | cna | hetloss | TCGA     |



|              |         |     |         |          |
|--------------|---------|-----|---------|----------|
| TCGA-EW-A10X | DDX5    | cna | amp     | TCGA     |
| TCGA-LL-A5YP | DDX5    | cna | amp     | TCGA     |
| MB-0346      | DDX5    | cna | gain    | METABRIC |
| MB-2827      | DDX5    | cna | hetloss | METABRIC |
| MB-5070      | DDX5    | cna | gain    | METABRIC |
| MB-5107      | DDX5    | cna | amp     | METABRIC |
| MB-5323      | DDX5    | cna | gain    | METABRIC |
| MB-6060      | DDX5    | cna | amp     | METABRIC |
| MB-6098      | DDX5    | cna | gain    | METABRIC |
| MB-6271      | DDX5    | cna | hetloss | METABRIC |
| MB-7048      | DDX5    | cna | gain    | METABRIC |
| MTS-T0064    | DDX5    | cna | gain    | METABRIC |
| PD11327      | DDX5    | cna | gain    | BASIS    |
| PD11742      | DDX5    | cna | gain    | BASIS    |
| PD22355      | DDX5    | cna | gain    | BASIS    |
| PD23561      | DDX5    | cna | gain    | BASIS    |
| PD23562      | DDX5    | cna | gain    | BASIS    |
| PD23574      | DDX5    | cna | gain    | BASIS    |
| PD24186      | DDX5    | cna | gain    | BASIS    |
| PD24206      | DDX5    | cna | hetloss | BASIS    |
| PD24337      | DDX5    | cna | hetloss | BASIS    |
| PD3890       | DDX5    | cna | gain    | BASIS    |
| PD3905       | DDX5    | cna | gain    | BASIS    |
| PD4006       | DDX5    | cna | amp     | BASIS    |
| PD4826       | DDX5    | cna | gain    | BASIS    |
| PD4967       | DDX5    | cna | homdel  | BASIS    |
| PD5930       | DDX5    | cna | gain    | BASIS    |
| PD5935       | DDX5    | cna | gain    | BASIS    |
| PD5945       | DDX5    | cna | amp     | BASIS    |
| PD5948       | DDX5    | cna | gain    | BASIS    |
| PD6731       | DDX5    | cna | hetloss | BASIS    |
| PD7067       | DDX5    | cna | gain    | BASIS    |
| PD7215       | DDX5    | cna | gain    | BASIS    |
| PD8621       | DDX5    | cna | gain    | BASIS    |
| PD8980       | DDX5    | cna | gain    | BASIS    |
| PD9004       | DDX5    | cna | gain    | BASIS    |
| PD9702       | DDX5    | cna | gain    | BASIS    |
| TCGA-A2-A25B | FGFR1OP | cna | hetloss | TCGA     |
| TCGA-AN-A0XU | FGFR1OP | cna | gain    | TCGA     |
| TCGA-AO-A0JL | FGFR1OP | cna | hetloss | TCGA     |
| TCGA-BH-A0AW | FGFR1OP | cna | amp     | TCGA     |
| TCGA-BH-A0C0 | FGFR1OP | cna | hetloss | TCGA     |
| TCGA-BH-A18R | FGFR1OP | cna | homdel  | TCGA     |
| TCGA-C8-A12L | FGFR1OP | cna | hetloss | TCGA     |
| TCGA-D8-A27M | FGFR1OP | cna | hetloss | TCGA     |
| TCGA-E9-A1NC | FGFR1OP | cna | hetloss | TCGA     |
| TCGA-LL-A5YP | FGFR1OP | cna | gain    | TCGA     |

|              |         |     |         |          |
|--------------|---------|-----|---------|----------|
| MB-2827      | FGFR1OP | cna | hetloss | METABRIC |
| MB-5107      | FGFR1OP | cna | hetloss | METABRIC |
| MB-6060      | FGFR1OP | cna | hetloss | METABRIC |
| MB-6098      | FGFR1OP | cna | hetloss | METABRIC |
| MB-7032      | FGFR1OP | cna | gain    | METABRIC |
| MB-7048      | FGFR1OP | cna | hetloss | METABRIC |
| MTS-T0064    | FGFR1OP | cna | hetloss | METABRIC |
| PD10014      | FGFR1OP | cna | hetloss | BASIS    |
| PD11327      | FGFR1OP | cna | gain    | BASIS    |
| PD13296      | FGFR1OP | cna | homdel  | BASIS    |
| PD13297      | FGFR1OP | cna | hetloss | BASIS    |
| PD13299      | FGFR1OP | cna | gain    | BASIS    |
| PD23562      | FGFR1OP | cna | gain    | BASIS    |
| PD23574      | FGFR1OP | cna | amp     | BASIS    |
| PD24186      | FGFR1OP | cna | gain    | BASIS    |
| PD24206      | FGFR1OP | cna | gain    | BASIS    |
| PD24337      | FGFR1OP | cna | hetloss | BASIS    |
| PD3890       | FGFR1OP | cna | hetloss | BASIS    |
| PD3905       | FGFR1OP | cna | gain    | BASIS    |
| PD4005       | FGFR1OP | cna | hetloss | BASIS    |
| PD4006       | FGFR1OP | cna | gain    | BASIS    |
| PD4826       | FGFR1OP | cna | gain    | BASIS    |
| PD4967       | FGFR1OP | cna | hetloss | BASIS    |
| PD5935       | FGFR1OP | cna | gain    | BASIS    |
| PD5945       | FGFR1OP | cna | gain    | BASIS    |
| PD5948       | FGFR1OP | cna | hetloss | BASIS    |
| PD6406       | FGFR1OP | cna | hetloss | BASIS    |
| PD6413       | FGFR1OP | cna | hetloss | BASIS    |
| PD6731       | FGFR1OP | cna | hetloss | BASIS    |
| PD7067       | FGFR1OP | cna | amp     | BASIS    |
| PD8980       | FGFR1OP | cna | gain    | BASIS    |
| PD9004       | FGFR1OP | cna | gain    | BASIS    |
| PD9585       | FGFR1OP | cna | hetloss | BASIS    |
| PD9702       | FGFR1OP | cna | gain    | BASIS    |
| TCGA-A2-A25B | IKZF3   | cna | hetloss | TCGA     |
| TCGA-AN-A0XU | IKZF3   | cna | gain    | TCGA     |
| TCGA-AO-A0JL | IKZF3   | cna | amp     | TCGA     |
| TCGA-BH-A0AW | IKZF3   | cna | amp     | TCGA     |
| TCGA-BH-A0C0 | IKZF3   | cna | gain    | TCGA     |
| TCGA-BH-A18R | IKZF3   | cna | amp     | TCGA     |
| TCGA-BH-A1FU | IKZF3   | cna | amp     | TCGA     |
| TCGA-C8-A12L | IKZF3   | cna | amp     | TCGA     |
| TCGA-D8-A27M | IKZF3   | cna | hetloss | TCGA     |
| TCGA-E2-A1L7 | IKZF3   | cna | hetloss | TCGA     |
| TCGA-E9-A1NC | IKZF3   | cna | hetloss | TCGA     |
| MB-0346      | IKZF3   | cna | amp     | METABRIC |
| MB-2827      | IKZF3   | cna | hetloss | METABRIC |

|              |          |     |         |          |
|--------------|----------|-----|---------|----------|
| MB-5070      | IKZF3    | cna | hetloss | METABRIC |
| MB-5107      | IKZF3    | cna | gain    | METABRIC |
| MB-5465      | IKZF3    | cna | hetloss | METABRIC |
| MB-6060      | IKZF3    | cna | amp     | METABRIC |
| MB-6098      | IKZF3    | cna | hetloss | METABRIC |
| MB-6271      | IKZF3    | cna | hetloss | METABRIC |
| MB-7038      | IKZF3    | cna | hetloss | METABRIC |
| MB-7048      | IKZF3    | cna | gain    | METABRIC |
| MB-0420      | IKZF3    | cna | hetloss | METABRIC |
| PD13297      | IKZF3    | cna | hetloss | BASIS    |
| PD13299      | IKZF3    | cna | gain    | BASIS    |
| PD13771      | IKZF3    | cna | hetloss | BASIS    |
| PD23561      | IKZF3    | cna | amp     | BASIS    |
| PD23562      | IKZF3    | cna | gain    | BASIS    |
| PD24186      | IKZF3    | cna | gain    | BASIS    |
| PD24206      | IKZF3    | cna | hetloss | BASIS    |
| PD24337      | IKZF3    | cna | hetloss | BASIS    |
| PD3890       | IKZF3    | cna | hetloss | BASIS    |
| PD3905       | IKZF3    | cna | gain    | BASIS    |
| PD4005       | IKZF3    | cna | hetloss | BASIS    |
| PD4826       | IKZF3    | cna | amp     | BASIS    |
| PD4967       | IKZF3    | cna | hetloss | BASIS    |
| PD5945       | IKZF3    | cna | amp     | BASIS    |
| PD5948       | IKZF3    | cna | gain    | BASIS    |
| PD6406       | IKZF3    | cna | hetloss | BASIS    |
| PD6731       | IKZF3    | cna | hetloss | BASIS    |
| PD7067       | IKZF3    | cna | gain    | BASIS    |
| PD7215       | IKZF3    | cna | gain    | BASIS    |
| PD9004       | IKZF3    | cna | gain    | BASIS    |
| PD9585       | IKZF3    | cna | hetloss | BASIS    |
| PD9702       | IKZF3    | cna | amp     | BASIS    |
| TCGA-A2-A25B | KIAA1549 | cna | gain    | TCGA     |
| TCGA-AO-A0JL | KIAA1549 | cna | gain    | TCGA     |
| TCGA-BH-A0AW | KIAA1549 | cna | gain    | TCGA     |
| TCGA-D8-A27M | KIAA1549 | cna | gain    | TCGA     |
| TCGA-E2-A1L7 | KIAA1549 | cna | hetloss | TCGA     |
| TCGA-E9-A1NC | KIAA1549 | cna | gain    | TCGA     |
| TCGA-LL-A5YP | KIAA1549 | cna | gain    | TCGA     |
| MB-0346      | KIAA1549 | cna | hetloss | METABRIC |
| MB-2827      | KIAA1549 | cna | hetloss | METABRIC |
| MB-5070      | KIAA1549 | cna | hetloss | METABRIC |
| MB-5107      | KIAA1549 | cna | gain    | METABRIC |
| MB-6098      | KIAA1549 | cna | gain    | METABRIC |
| MB-7038      | KIAA1549 | cna | gain    | METABRIC |
| MB-7048      | KIAA1549 | cna | gain    | METABRIC |
| PD10014      | KIAA1549 | cna | gain    | BASIS    |
| PD13296      | KIAA1549 | cna | hetloss | BASIS    |

|              |          |     |         |          |
|--------------|----------|-----|---------|----------|
| PD13297      | KIAA1549 | cna | gain    | BASIS    |
| PD13299      | KIAA1549 | cna | gain    | BASIS    |
| PD22355      | KIAA1549 | cna | hetloss | BASIS    |
| PD23562      | KIAA1549 | cna | gain    | BASIS    |
| PD23574      | KIAA1549 | cna | gain    | BASIS    |
| PD23578      | KIAA1549 | cna | hetloss | BASIS    |
| PD24186      | KIAA1549 | cna | amp     | BASIS    |
| PD24202      | KIAA1549 | cna | gain    | BASIS    |
| PD24206      | KIAA1549 | cna | hetloss | BASIS    |
| PD24337      | KIAA1549 | cna | gain    | BASIS    |
| PD3890       | KIAA1549 | cna | hetloss | BASIS    |
| PD3905       | KIAA1549 | cna | gain    | BASIS    |
| PD4006       | KIAA1549 | cna | gain    | BASIS    |
| PD4107       | KIAA1549 | cna | amp     | BASIS    |
| PD4826       | KIAA1549 | cna | gain    | BASIS    |
| PD4967       | KIAA1549 | cna | hetloss | BASIS    |
| PD5930       | KIAA1549 | cna | gain    | BASIS    |
| PD5935       | KIAA1549 | cna | gain    | BASIS    |
| PD5945       | KIAA1549 | cna | amp     | BASIS    |
| PD5948       | KIAA1549 | cna | gain    | BASIS    |
| PD6406       | KIAA1549 | cna | gain    | BASIS    |
| PD6731       | KIAA1549 | cna | hetloss | BASIS    |
| PD7067       | KIAA1549 | cna | gain    | BASIS    |
| PD7215       | KIAA1549 | cna | gain    | BASIS    |
| PD8621       | KIAA1549 | cna | gain    | BASIS    |
| PD9004       | KIAA1549 | cna | gain    | BASIS    |
| PD9585       | KIAA1549 | cna | gain    | BASIS    |
| PD9702       | KIAA1549 | cna | gain    | BASIS    |
| TCGA-A2-A25B | LATS1    | cna | hetloss | TCGA     |
| TCGA-AN-A0XU | LATS1    | cna | gain    | TCGA     |
| TCGA-AO-A0JL | LATS1    | cna | hetloss | TCGA     |
| TCGA-BH-A0AW | LATS1    | cna | amp     | TCGA     |
| TCGA-BH-A0C0 | LATS1    | cna | gain    | TCGA     |
| TCGA-BH-A18R | LATS1    | cna | gain    | TCGA     |
| TCGA-C8-A12L | LATS1    | cna | gain    | TCGA     |
| TCGA-D8-A27M | LATS1    | cna | hetloss | TCGA     |
| TCGA-E2-A1L7 | LATS1    | cna | gain    | TCGA     |
| MB-2827      | LATS1    | cna | hetloss | METABRIC |
| MB-5070      | LATS1    | cna | amp     | METABRIC |
| MB-5107      | LATS1    | cna | hetloss | METABRIC |
| MB-6098      | LATS1    | cna | hetloss | METABRIC |
| MB-7032      | LATS1    | cna | hetloss | METABRIC |
| MB-7038      | LATS1    | cna | amp     | METABRIC |
| MB-7048      | LATS1    | cna | hetloss | METABRIC |
| MB-0420      | LATS1    | cna | hetloss | METABRIC |
| PD11327      | LATS1    | cna | gain    | BASIS    |
| PD13296      | LATS1    | cna | hetloss | BASIS    |

|                   |       |     |         |            |
|-------------------|-------|-----|---------|------------|
| PD13297           | LATS1 | cna | hetloss | BASIS      |
| PD13299           | LATS1 | cna | gain    | BASIS      |
| PD23562           | LATS1 | cna | gain    | BASIS      |
| PD23574           | LATS1 | cna | gain    | BASIS      |
| PD24186           | LATS1 | cna | gain    | BASIS      |
| PD24202           | LATS1 | cna | gain    | BASIS      |
| PD24206           | LATS1 | cna | gain    | BASIS      |
| PD24337           | LATS1 | cna | hetloss | BASIS      |
| PD3890            | LATS1 | cna | hetloss | BASIS      |
| PD3905            | LATS1 | cna | gain    | BASIS      |
| PD4005            | LATS1 | cna | hetloss | BASIS      |
| PD4006            | LATS1 | cna | gain    | BASIS      |
| PD4826            | LATS1 | cna | gain    | BASIS      |
| PD4967            | LATS1 | cna | hetloss | BASIS      |
| PD5935            | LATS1 | cna | gain    | BASIS      |
| PD5945            | LATS1 | cna | amp     | BASIS      |
| PD6406            | LATS1 | cna | hetloss | BASIS      |
| PD6413            | LATS1 | cna | hetloss | BASIS      |
| PD6731            | LATS1 | cna | hetloss | BASIS      |
| PD7067            | LATS1 | cna | amp     | BASIS      |
| PD7215            | LATS1 | cna | gain    | BASIS      |
| PD8980            | LATS1 | cna | gain    | BASIS      |
| PD9004            | LATS1 | cna | homdel  | BASIS      |
| PD9585            | LATS1 | cna | hetloss | BASIS      |
| PD9702            | LATS1 | cna | gain    | BASIS      |
| TCGA-A2-A25B      | MCL1  | cna | gain    | TCGA       |
| TCGA-AN-A0XU      | MCL1  | cna | gain    | TCGA       |
| TCGA-AO-A0JL      | MCL1  | cna | gain    | TCGA       |
| TCGA-BH-A0AW      | MCL1  | cna | gain    | TCGA       |
| TCGA-BH-A0C0      | MCL1  | cna | hetloss | TCGA       |
| TCGA-BH-A18R      | MCL1  | cna | gain    | TCGA       |
| TCGA-BH-A1FU      | MCL1  | cna | gain    | TCGA       |
| TCGA-C8-A12L      | MCL1  | cna | gain    | TCGA       |
| TCGA-E2-A1L7      | MCL1  | cna | gain    | TCGA       |
| TCGA-EW-A10X      | MCL1  | cna | gain    | TCGA       |
| TCGA-LL-A5YP      | MCL1  | cna | amp     | TCGA       |
| MB-2827           | MCL1  | cna | amp     | METABRIC   |
| MB-5070           | MCL1  | cna | gain    | METABRIC   |
| MB-6098           | MCL1  | cna | amp     | METABRIC   |
| MB-7032           | MCL1  | cna | gain    | METABRIC   |
| MB-7048           | MCL1  | cna | hetloss | METABRIC   |
| MB-0420           | MCL1  | cna | gain    | METABRIC   |
| P-0002858-T01-IM3 | MCL1  | cna | amp     | MSK-IMPACT |
| PD10014           | MCL1  | cna | gain    | BASIS      |
| PD11327           | MCL1  | cna | gain    | BASIS      |
| PD13297           | MCL1  | cna | gain    | BASIS      |
| PD13299           | MCL1  | cna | gain    | BASIS      |

|              |       |     |         |          |
|--------------|-------|-----|---------|----------|
| PD14442      | MCL1  | cna | gain    | BASIS    |
| PD22355      | MCL1  | cna | gain    | BASIS    |
| PD23562      | MCL1  | cna | amp     | BASIS    |
| PD23574      | MCL1  | cna | gain    | BASIS    |
| PD24186      | MCL1  | cna | gain    | BASIS    |
| PD24206      | MCL1  | cna | gain    | BASIS    |
| PD3905       | MCL1  | cna | gain    | BASIS    |
| PD4005       | MCL1  | cna | gain    | BASIS    |
| PD4006       | MCL1  | cna | amp     | BASIS    |
| PD4107       | MCL1  | cna | gain    | BASIS    |
| PD4826       | MCL1  | cna | gain    | BASIS    |
| PD4967       | MCL1  | cna | hetloss | BASIS    |
| PD5930       | MCL1  | cna | amp     | BASIS    |
| PD5935       | MCL1  | cna | gain    | BASIS    |
| PD5945       | MCL1  | cna | amp     | BASIS    |
| PD5948       | MCL1  | cna | gain    | BASIS    |
| PD6413       | MCL1  | cna | gain    | BASIS    |
| PD7067       | MCL1  | cna | amp     | BASIS    |
| PD7215       | MCL1  | cna | gain    | BASIS    |
| PD8621       | MCL1  | cna | amp     | BASIS    |
| PD9004       | MCL1  | cna | amp     | BASIS    |
| PD9702       | MCL1  | cna | amp     | BASIS    |
| TCGA-A2-A25B | MECOM | cna | gain    | TCGA     |
| TCGA-AN-A0XU | MECOM | cna | gain    | TCGA     |
| TCGA-BH-A0AW | MECOM | cna | gain    | TCGA     |
| TCGA-BH-A0C0 | MECOM | cna | gain    | TCGA     |
| TCGA-BH-A18R | MECOM | cna | amp     | TCGA     |
| TCGA-BH-A1FU | MECOM | cna | hetloss | TCGA     |
| TCGA-C8-A12L | MECOM | cna | gain    | TCGA     |
| TCGA-E2-A1L7 | MECOM | cna | gain    | TCGA     |
| TCGA-LL-A5YP | MECOM | cna | gain    | TCGA     |
| MB-0346      | MECOM | cna | gain    | METABRIC |
| MB-2827      | MECOM | cna | hetloss | METABRIC |
| MB-5070      | MECOM | cna | amp     | METABRIC |
| MB-5107      | MECOM | cna | amp     | METABRIC |
| MB-6060      | MECOM | cna | gain    | METABRIC |
| MB-7038      | MECOM | cna | hetloss | METABRIC |
| MB-0420      | MECOM | cna | amp     | METABRIC |
| MTS-T0064    | MECOM | cna | amp     | METABRIC |
| PD11327      | MECOM | cna | amp     | BASIS    |
| PD13296      | MECOM | cna | amp     | BASIS    |
| PD13299      | MECOM | cna | gain    | BASIS    |
| PD13771      | MECOM | cna | hetloss | BASIS    |
| PD22355      | MECOM | cna | gain    | BASIS    |
| PD23561      | MECOM | cna | hetloss | BASIS    |
| PD23562      | MECOM | cna | amp     | BASIS    |
| PD23574      | MECOM | cna | gain    | BASIS    |

|              |       |     |         |          |
|--------------|-------|-----|---------|----------|
| PD23578      | MECOM | cna | gain    | BASIS    |
| PD24186      | MECOM | cna | amp     | BASIS    |
| PD24202      | MECOM | cna | gain    | BASIS    |
| PD24206      | MECOM | cna | gain    | BASIS    |
| PD24337      | MECOM | cna | gain    | BASIS    |
| PD3905       | MECOM | cna | gain    | BASIS    |
| PD4005       | MECOM | cna | gain    | BASIS    |
| PD4107       | MECOM | cna | gain    | BASIS    |
| PD4826       | MECOM | cna | gain    | BASIS    |
| PD5930       | MECOM | cna | gain    | BASIS    |
| PD5935       | MECOM | cna | amp     | BASIS    |
| PD5945       | MECOM | cna | amp     | BASIS    |
| PD5948       | MECOM | cna | amp     | BASIS    |
| PD6406       | MECOM | cna | gain    | BASIS    |
| PD7067       | MECOM | cna | gain    | BASIS    |
| PD7215       | MECOM | cna | gain    | BASIS    |
| PD8621       | MECOM | cna | gain    | BASIS    |
| PD8980       | MECOM | cna | gain    | BASIS    |
| PD9702       | MECOM | cna | amp     | BASIS    |
| TCGA-A2-A25B | MLLT4 | cna | hetloss | TCGA     |
| TCGA-AN-A0XU | MLLT4 | cna | gain    | TCGA     |
| TCGA-AO-A0JL | MLLT4 | cna | hetloss | TCGA     |
| TCGA-BH-A0AW | MLLT4 | cna | amp     | TCGA     |
| TCGA-BH-A0C0 | MLLT4 | cna | hetloss | TCGA     |
| TCGA-BH-A18R | MLLT4 | cna | homdel  | TCGA     |
| TCGA-C8-A12L | MLLT4 | cna | hetloss | TCGA     |
| TCGA-D8-A27M | MLLT4 | cna | hetloss | TCGA     |
| TCGA-E9-A1NC | MLLT4 | cna | hetloss | TCGA     |
| TCGA-LL-A5YP | MLLT4 | cna | gain    | TCGA     |
| MB-2827      | MLLT4 | cna | hetloss | METABRIC |
| MB-5107      | MLLT4 | cna | hetloss | METABRIC |
| MB-6060      | MLLT4 | cna | hetloss | METABRIC |
| MB-6098      | MLLT4 | cna | hetloss | METABRIC |
| MB-7032      | MLLT4 | cna | gain    | METABRIC |
| MB-7048      | MLLT4 | cna | hetloss | METABRIC |
| MTS-T0064    | MLLT4 | cna | hetloss | METABRIC |
| PD10014      | MLLT4 | cna | hetloss | BASIS    |
| PD11327      | MLLT4 | cna | gain    | BASIS    |
| PD13296      | MLLT4 | cna | homdel  | BASIS    |
| PD13297      | MLLT4 | cna | hetloss | BASIS    |
| PD13299      | MLLT4 | cna | gain    | BASIS    |
| PD22355      | MLLT4 | cna | gain    | BASIS    |
| PD23562      | MLLT4 | cna | gain    | BASIS    |
| PD23574      | MLLT4 | cna | amp     | BASIS    |
| PD24186      | MLLT4 | cna | gain    | BASIS    |
| PD24206      | MLLT4 | cna | amp     | BASIS    |
| PD24337      | MLLT4 | cna | hetloss | BASIS    |

|              |       |     |         |          |
|--------------|-------|-----|---------|----------|
| PD3890       | MLLT4 | cna | hetloss | BASIS    |
| PD3905       | MLLT4 | cna | gain    | BASIS    |
| PD4006       | MLLT4 | cna | gain    | BASIS    |
| PD4826       | MLLT4 | cna | gain    | BASIS    |
| PD4967       | MLLT4 | cna | hetloss | BASIS    |
| PD5935       | MLLT4 | cna | amp     | BASIS    |
| PD5945       | MLLT4 | cna | gain    | BASIS    |
| PD5948       | MLLT4 | cna | hetloss | BASIS    |
| PD6406       | MLLT4 | cna | hetloss | BASIS    |
| PD6413       | MLLT4 | cna | hetloss | BASIS    |
| PD6731       | MLLT4 | cna | hetloss | BASIS    |
| PD7067       | MLLT4 | cna | amp     | BASIS    |
| PD8980       | MLLT4 | cna | gain    | BASIS    |
| PD9004       | MLLT4 | cna | gain    | BASIS    |
| PD9585       | MLLT4 | cna | hetloss | BASIS    |
| PD9702       | MLLT4 | cna | gain    | BASIS    |
| TCGA-A2-A25B | PTPRO | cna | hetloss | TCGA     |
| TCGA-AN-A0XU | PTPRO | cna | hetloss | TCGA     |
| TCGA-AO-A0JL | PTPRO | cna | hetloss | TCGA     |
| TCGA-BH-A0C0 | PTPRO | cna | hetloss | TCGA     |
| TCGA-BH-A18R | PTPRO | cna | gain    | TCGA     |
| TCGA-BH-A1FU | PTPRO | cna | hetloss | TCGA     |
| TCGA-C8-A12L | PTPRO | cna | gain    | TCGA     |
| TCGA-D8-A27M | PTPRO | cna | gain    | TCGA     |
| TCGA-E2-A1L7 | PTPRO | cna | hetloss | TCGA     |
| TCGA-LL-A5YP | PTPRO | cna | hetloss | TCGA     |
| MB-0346      | PTPRO | cna | hetloss | METABRIC |
| MB-2827      | PTPRO | cna | hetloss | METABRIC |
| MB-5070      | PTPRO | cna | hetloss | METABRIC |
| MB-6060      | PTPRO | cna | gain    | METABRIC |
| MB-6098      | PTPRO | cna | gain    | METABRIC |
| MB-7038      | PTPRO | cna | hetloss | METABRIC |
| MB-7048      | PTPRO | cna | gain    | METABRIC |
| PD10014      | PTPRO | cna | gain    | BASIS    |
| PD11327      | PTPRO | cna | gain    | BASIS    |
| PD11742      | PTPRO | cna | gain    | BASIS    |
| PD13296      | PTPRO | cna | hetloss | BASIS    |
| PD13297      | PTPRO | cna | hetloss | BASIS    |
| PD13299      | PTPRO | cna | gain    | BASIS    |
| PD13771      | PTPRO | cna | hetloss | BASIS    |
| PD23574      | PTPRO | cna | gain    | BASIS    |
| PD24186      | PTPRO | cna | gain    | BASIS    |
| PD24202      | PTPRO | cna | hetloss | BASIS    |
| PD3890       | PTPRO | cna | hetloss | BASIS    |
| PD3905       | PTPRO | cna | gain    | BASIS    |
| PD4005       | PTPRO | cna | hetloss | BASIS    |
| PD4006       | PTPRO | cna | gain    | BASIS    |



|                   |        |     |         |            |
|-------------------|--------|-----|---------|------------|
| PD4107            | PTPRO  | cna | gain    | BASIS      |
| PD4826            | PTPRO  | cna | hetloss | BASIS      |
| PD5930            | PTPRO  | cna | gain    | BASIS      |
| PD5935            | PTPRO  | cna | gain    | BASIS      |
| PD5945            | PTPRO  | cna | amp     | BASIS      |
| PD5948            | PTPRO  | cna | hetloss | BASIS      |
| PD6406            | PTPRO  | cna | amp     | BASIS      |
| PD6731            | PTPRO  | cna | hetloss | BASIS      |
| PD7215            | PTPRO  | cna | gain    | BASIS      |
| PD8621            | PTPRO  | cna | gain    | BASIS      |
| PD8980            | PTPRO  | cna | hetloss | BASIS      |
| PD9004            | PTPRO  | cna | gain    | BASIS      |
| PD9702            | PTPRO  | cna | gain    | BASIS      |
| TCGA-A2-A25B      | RAD51C | cna | amp     | TCGA       |
| TCGA-AN-A0XU      | RAD51C | cna | gain    | TCGA       |
| TCGA-AO-A0JL      | RAD51C | cna | hetloss | TCGA       |
| TCGA-BH-A0AW      | RAD51C | cna | amp     | TCGA       |
| TCGA-BH-A0C0      | RAD51C | cna | gain    | TCGA       |
| TCGA-BH-A18R      | RAD51C | cna | amp     | TCGA       |
| TCGA-C8-A12L      | RAD51C | cna | gain    | TCGA       |
| TCGA-D8-A27M      | RAD51C | cna | hetloss | TCGA       |
| TCGA-EW-A10X      | RAD51C | cna | amp     | TCGA       |
| MB-0346           | RAD51C | cna | gain    | METABRIC   |
| MB-2827           | RAD51C | cna | hetloss | METABRIC   |
| MB-5070           | RAD51C | cna | hetloss | METABRIC   |
| MB-5107           | RAD51C | cna | amp     | METABRIC   |
| MB-5323           | RAD51C | cna | gain    | METABRIC   |
| MB-6060           | RAD51C | cna | hetloss | METABRIC   |
| MB-6098           | RAD51C | cna | hetloss | METABRIC   |
| MB-6271           | RAD51C | cna | hetloss | METABRIC   |
| MB-7048           | RAD51C | cna | hetloss | METABRIC   |
| P-0002023-T01-IM3 | RAD51C | cna | amp     | MSK-IMPACT |
| P-0002858-T01-IM3 | RAD51C | cna | amp     | MSK-IMPACT |
| PD11327           | RAD51C | cna | gain    | BASIS      |
| PD11742           | RAD51C | cna | gain    | BASIS      |
| PD13299           | RAD51C | cna | gain    | BASIS      |
| PD22355           | RAD51C | cna | gain    | BASIS      |
| PD23561           | RAD51C | cna | hetloss | BASIS      |
| PD23562           | RAD51C | cna | gain    | BASIS      |
| PD23574           | RAD51C | cna | gain    | BASIS      |
| PD24186           | RAD51C | cna | gain    | BASIS      |
| PD24337           | RAD51C | cna | hetloss | BASIS      |
| PD3890            | RAD51C | cna | hetloss | BASIS      |
| PD3905            | RAD51C | cna | gain    | BASIS      |
| PD4006            | RAD51C | cna | amp     | BASIS      |
| PD4967            | RAD51C | cna | homdel  | BASIS      |
| PD5930            | RAD51C | cna | gain    | BASIS      |

|              |        |     |         |          |
|--------------|--------|-----|---------|----------|
| PD5945       | RAD51C | cna | amp     | BASIS    |
| PD5948       | RAD51C | cna | gain    | BASIS    |
| PD6406       | RAD51C | cna | hetloss | BASIS    |
| PD6731       | RAD51C | cna | hetloss | BASIS    |
| PD7067       | RAD51C | cna | gain    | BASIS    |
| PD7215       | RAD51C | cna | gain    | BASIS    |
| PD8621       | RAD51C | cna | gain    | BASIS    |
| PD8980       | RAD51C | cna | gain    | BASIS    |
| PD9004       | RAD51C | cna | gain    | BASIS    |
| PD9702       | RAD51C | cna | gain    | BASIS    |
| TCGA-A2-A25B | SS18L1 | cna | gain    | TCGA     |
| TCGA-AN-A0XU | SS18L1 | cna | gain    | TCGA     |
| TCGA-AO-A0JL | SS18L1 | cna | gain    | TCGA     |
| TCGA-BH-A0AW | SS18L1 | cna | gain    | TCGA     |
| TCGA-BH-A18R | SS18L1 | cna | gain    | TCGA     |
| TCGA-C8-A12L | SS18L1 | cna | gain    | TCGA     |
| TCGA-D8-A27M | SS18L1 | cna | hetloss | TCGA     |
| TCGA-E2-A1L7 | SS18L1 | cna | gain    | TCGA     |
| TCGA-E9-A1NC | SS18L1 | cna | gain    | TCGA     |
| TCGA-LL-A5YP | SS18L1 | cna | gain    | TCGA     |
| MB-0346      | SS18L1 | cna | gain    | METABRIC |
| MB-2827      | SS18L1 | cna | hetloss | METABRIC |
| MB-5070      | SS18L1 | cna | hetloss | METABRIC |
| MB-5107      | SS18L1 | cna | gain    | METABRIC |
| MB-6060      | SS18L1 | cna | gain    | METABRIC |
| MB-6098      | SS18L1 | cna | hetloss | METABRIC |
| PD11327      | SS18L1 | cna | gain    | BASIS    |
| PD11742      | SS18L1 | cna | gain    | BASIS    |
| PD13296      | SS18L1 | cna | gain    | BASIS    |
| PD13297      | SS18L1 | cna | hetloss | BASIS    |
| PD13299      | SS18L1 | cna | gain    | BASIS    |
| PD13771      | SS18L1 | cna | gain    | BASIS    |
| PD22355      | SS18L1 | cna | gain    | BASIS    |
| PD23562      | SS18L1 | cna | gain    | BASIS    |
| PD23574      | SS18L1 | cna | gain    | BASIS    |
| PD23578      | SS18L1 | cna | gain    | BASIS    |
| PD24186      | SS18L1 | cna | gain    | BASIS    |
| PD24202      | SS18L1 | cna | hetloss | BASIS    |
| PD24206      | SS18L1 | cna | gain    | BASIS    |
| PD3905       | SS18L1 | cna | gain    | BASIS    |
| PD4005       | SS18L1 | cna | hetloss | BASIS    |
| PD4006       | SS18L1 | cna | gain    | BASIS    |
| PD4107       | SS18L1 | cna | gain    | BASIS    |
| PD4826       | SS18L1 | cna | gain    | BASIS    |
| PD5935       | SS18L1 | cna | gain    | BASIS    |
| PD5945       | SS18L1 | cna | amp     | BASIS    |
| PD5948       | SS18L1 | cna | gain    | BASIS    |

|              |        |     |         |          |
|--------------|--------|-----|---------|----------|
| PD6406       | SS18L1 | cna | gain    | BASIS    |
| PD7067       | SS18L1 | cna | gain    | BASIS    |
| PD7215       | SS18L1 | cna | amp     | BASIS    |
| PD8980       | SS18L1 | cna | gain    | BASIS    |
| PD9004       | SS18L1 | cna | gain    | BASIS    |
| PD9585       | SS18L1 | cna | hetloss | BASIS    |
| PD9702       | SS18L1 | cna | gain    | BASIS    |
| TCGA-A2-A25B | TIPARP | cna | gain    | TCGA     |
| TCGA-AN-A0XU | TIPARP | cna | gain    | TCGA     |
| TCGA-BH-A0C0 | TIPARP | cna | gain    | TCGA     |
| TCGA-BH-A18R | TIPARP | cna | gain    | TCGA     |
| TCGA-BH-A1FU | TIPARP | cna | hetloss | TCGA     |
| TCGA-C8-A12L | TIPARP | cna | gain    | TCGA     |
| TCGA-E2-A1L7 | TIPARP | cna | gain    | TCGA     |
| TCGA-E9-A1NC | TIPARP | cna | gain    | TCGA     |
| TCGA-LL-A5YP | TIPARP | cna | gain    | TCGA     |
| MB-0346      | TIPARP | cna | hetloss | METABRIC |
| MB-5070      | TIPARP | cna | amp     | METABRIC |
| MB-5107      | TIPARP | cna | amp     | METABRIC |
| MB-5465      | TIPARP | cna | amp     | METABRIC |
| MB-6060      | TIPARP | cna | gain    | METABRIC |
| MB-6098      | TIPARP | cna | gain    | METABRIC |
| MB-7038      | TIPARP | cna | hetloss | METABRIC |
| MB-7048      | TIPARP | cna | hetloss | METABRIC |
| MB-0420      | TIPARP | cna | amp     | METABRIC |
| PD11327      | TIPARP | cna | gain    | BASIS    |
| PD13296      | TIPARP | cna | gain    | BASIS    |
| PD13297      | TIPARP | cna | gain    | BASIS    |
| PD13299      | TIPARP | cna | gain    | BASIS    |
| PD13771      | TIPARP | cna | hetloss | BASIS    |
| PD22355      | TIPARP | cna | gain    | BASIS    |
| PD23561      | TIPARP | cna | hetloss | BASIS    |
| PD23562      | TIPARP | cna | amp     | BASIS    |
| PD23574      | TIPARP | cna | gain    | BASIS    |
| PD23578      | TIPARP | cna | gain    | BASIS    |
| PD24186      | TIPARP | cna | gain    | BASIS    |
| PD24202      | TIPARP | cna | gain    | BASIS    |
| PD24206      | TIPARP | cna | gain    | BASIS    |
| PD3905       | TIPARP | cna | gain    | BASIS    |
| PD4107       | TIPARP | cna | gain    | BASIS    |
| PD5930       | TIPARP | cna | gain    | BASIS    |
| PD5935       | TIPARP | cna | gain    | BASIS    |
| PD5945       | TIPARP | cna | amp     | BASIS    |
| PD5948       | TIPARP | cna | amp     | BASIS    |
| PD6731       | TIPARP | cna | gain    | BASIS    |
| PD7067       | TIPARP | cna | gain    | BASIS    |
| PD7215       | TIPARP | cna | amp     | BASIS    |

|              |        |     |         |          |
|--------------|--------|-----|---------|----------|
| PD8621       | TIPARP | cna | gain    | BASIS    |
| PD8980       | TIPARP | cna | gain    | BASIS    |
| PD9585       | TIPARP | cna | hetloss | BASIS    |
| PD9702       | TIPARP | cna | amp     | BASIS    |
| TCGA-A2-A25B | ZNF217 | cna | gain    | TCGA     |
| TCGA-AO-A0JL | ZNF217 | cna | gain    | TCGA     |
| TCGA-BH-A0AW | ZNF217 | cna | gain    | TCGA     |
| TCGA-BH-A0C0 | ZNF217 | cna | gain    | TCGA     |
| TCGA-BH-A18R | ZNF217 | cna | gain    | TCGA     |
| TCGA-C8-A12L | ZNF217 | cna | gain    | TCGA     |
| TCGA-D8-A27M | ZNF217 | cna | hetloss | TCGA     |
| TCGA-E2-A1L7 | ZNF217 | cna | gain    | TCGA     |
| TCGA-LL-A5YP | ZNF217 | cna | gain    | TCGA     |
| MB-0346      | ZNF217 | cna | gain    | METABRIC |
| MB-5070      | ZNF217 | cna | hetloss | METABRIC |
| MB-5107      | ZNF217 | cna | gain    | METABRIC |
| MB-6060      | ZNF217 | cna | gain    | METABRIC |
| MB-6098      | ZNF217 | cna | hetloss | METABRIC |
| MB-7038      | ZNF217 | cna | hetloss | METABRIC |
| MB-7048      | ZNF217 | cna | hetloss | METABRIC |
| PD11327      | ZNF217 | cna | hetloss | BASIS    |
| PD11742      | ZNF217 | cna | amp     | BASIS    |
| PD13296      | ZNF217 | cna | gain    | BASIS    |
| PD13297      | ZNF217 | cna | hetloss | BASIS    |
| PD13299      | ZNF217 | cna | gain    | BASIS    |
| PD13771      | ZNF217 | cna | gain    | BASIS    |
| PD22355      | ZNF217 | cna | gain    | BASIS    |
| PD23562      | ZNF217 | cna | gain    | BASIS    |
| PD23574      | ZNF217 | cna | gain    | BASIS    |
| PD24186      | ZNF217 | cna | gain    | BASIS    |
| PD24202      | ZNF217 | cna | hetloss | BASIS    |
| PD24206      | ZNF217 | cna | amp     | BASIS    |
| PD3905       | ZNF217 | cna | gain    | BASIS    |
| PD4005       | ZNF217 | cna | homdel  | BASIS    |
| PD4006       | ZNF217 | cna | gain    | BASIS    |
| PD4826       | ZNF217 | cna | gain    | BASIS    |
| PD5935       | ZNF217 | cna | gain    | BASIS    |
| PD5945       | ZNF217 | cna | amp     | BASIS    |
| PD5948       | ZNF217 | cna | gain    | BASIS    |
| PD6406       | ZNF217 | cna | gain    | BASIS    |
| PD6731       | ZNF217 | cna | hetloss | BASIS    |
| PD7067       | ZNF217 | cna | gain    | BASIS    |
| PD7215       | ZNF217 | cna | amp     | BASIS    |
| PD8621       | ZNF217 | cna | gain    | BASIS    |
| PD8980       | ZNF217 | cna | gain    | BASIS    |
| PD9004       | ZNF217 | cna | gain    | BASIS    |
| PD9585       | ZNF217 | cna | hetloss | BASIS    |

|              |        |     |         |          |
|--------------|--------|-----|---------|----------|
| PD9702       | ZNF217 | cna | gain    | BASIS    |
| TCGA-A2-A25B | ZNF750 | cna | gain    | TCGA     |
| TCGA-AN-A0XU | ZNF750 | cna | amp     | TCGA     |
| TCGA-AO-A0JL | ZNF750 | cna | hetloss | TCGA     |
| TCGA-BH-A0AW | ZNF750 | cna | amp     | TCGA     |
| TCGA-BH-A0C0 | ZNF750 | cna | gain    | TCGA     |
| TCGA-BH-A18R | ZNF750 | cna | homdel  | TCGA     |
| TCGA-C8-A12L | ZNF750 | cna | gain    | TCGA     |
| TCGA-D8-A27M | ZNF750 | cna | gain    | TCGA     |
| TCGA-E2-A1L7 | ZNF750 | cna | gain    | TCGA     |
| TCGA-EW-A10X | ZNF750 | cna | amp     | TCGA     |
| TCGA-LL-A5YP | ZNF750 | cna | amp     | TCGA     |
| MB-0346      | ZNF750 | cna | gain    | METABRIC |
| MB-2827      | ZNF750 | cna | hetloss | METABRIC |
| MB-5107      | ZNF750 | cna | amp     | METABRIC |
| MB-5465      | ZNF750 | cna | gain    | METABRIC |
| MB-6060      | ZNF750 | cna | hetloss | METABRIC |
| MB-6098      | ZNF750 | cna | gain    | METABRIC |
| MB-6271      | ZNF750 | cna | hetloss | METABRIC |
| MTS-T0064    | ZNF750 | cna | gain    | METABRIC |
| PD10014      | ZNF750 | cna | gain    | BASIS    |
| PD11327      | ZNF750 | cna | amp     | BASIS    |
| PD22355      | ZNF750 | cna | hetloss | BASIS    |
| PD23561      | ZNF750 | cna | hetloss | BASIS    |
| PD23574      | ZNF750 | cna | amp     | BASIS    |
| PD24186      | ZNF750 | cna | amp     | BASIS    |
| PD24202      | ZNF750 | cna | gain    | BASIS    |
| PD24337      | ZNF750 | cna | hetloss | BASIS    |
| PD3890       | ZNF750 | cna | gain    | BASIS    |
| PD3905       | ZNF750 | cna | gain    | BASIS    |
| PD4006       | ZNF750 | cna | gain    | BASIS    |
| PD4107       | ZNF750 | cna | gain    | BASIS    |
| PD4967       | ZNF750 | cna | hetloss | BASIS    |
| PD5930       | ZNF750 | cna | gain    | BASIS    |
| PD5935       | ZNF750 | cna | gain    | BASIS    |
| PD5945       | ZNF750 | cna | amp     | BASIS    |
| PD5948       | ZNF750 | cna | gain    | BASIS    |
| PD6413       | ZNF750 | cna | hetloss | BASIS    |
| PD6731       | ZNF750 | cna | hetloss | BASIS    |
| PD7067       | ZNF750 | cna | gain    | BASIS    |
| PD7215       | ZNF750 | cna | gain    | BASIS    |
| PD8621       | ZNF750 | cna | gain    | BASIS    |
| PD9004       | ZNF750 | cna | gain    | BASIS    |
| PD9585       | ZNF750 | cna | gain    | BASIS    |
| PD9702       | ZNF750 | cna | gain    | BASIS    |
| TCGA-A2-A25B | A2ML1  | cna | hetloss | TCGA     |
| TCGA-AN-A0XU | A2ML1  | cna | hetloss | TCGA     |

|              |       |     |         |          |
|--------------|-------|-----|---------|----------|
| TCGA-AO-A0JL | A2ML1 | cna | hetloss | TCGA     |
| TCGA-BH-A0C0 | A2ML1 | cna | hetloss | TCGA     |
| TCGA-BH-A18R | A2ML1 | cna | gain    | TCGA     |
| TCGA-BH-A1FU | A2ML1 | cna | hetloss | TCGA     |
| TCGA-C8-A12L | A2ML1 | cna | gain    | TCGA     |
| TCGA-D8-A27M | A2ML1 | cna | gain    | TCGA     |
| TCGA-E9-A1NC | A2ML1 | cna | gain    | TCGA     |
| TCGA-LL-A5YP | A2ML1 | cna | hetloss | TCGA     |
| MB-0346      | A2ML1 | cna | hetloss | METABRIC |
| MB-5070      | A2ML1 | cna | amp     | METABRIC |
| MB-5107      | A2ML1 | cna | hetloss | METABRIC |
| MB-6098      | A2ML1 | cna | gain    | METABRIC |
| MB-7048      | A2ML1 | cna | gain    | METABRIC |
| MTS-T0064    | A2ML1 | cna | amp     | METABRIC |
| PD10014      | A2ML1 | cna | hetloss | BASIS    |
| PD11742      | A2ML1 | cna | gain    | BASIS    |
| PD13297      | A2ML1 | cna | hetloss | BASIS    |
| PD13299      | A2ML1 | cna | gain    | BASIS    |
| PD13771      | A2ML1 | cna | hetloss | BASIS    |
| PD23574      | A2ML1 | cna | gain    | BASIS    |
| PD23578      | A2ML1 | cna | gain    | BASIS    |
| PD24186      | A2ML1 | cna | gain    | BASIS    |
| PD24206      | A2ML1 | cna | homdel  | BASIS    |
| PD24337      | A2ML1 | cna | gain    | BASIS    |
| PD3890       | A2ML1 | cna | gain    | BASIS    |
| PD3905       | A2ML1 | cna | gain    | BASIS    |
| PD4005       | A2ML1 | cna | hetloss | BASIS    |
| PD4006       | A2ML1 | cna | amp     | BASIS    |
| PD4107       | A2ML1 | cna | gain    | BASIS    |
| PD4826       | A2ML1 | cna | hetloss | BASIS    |
| PD4967       | A2ML1 | cna | hetloss | BASIS    |
| PD5930       | A2ML1 | cna | gain    | BASIS    |
| PD5935       | A2ML1 | cna | gain    | BASIS    |
| PD5945       | A2ML1 | cna | amp     | BASIS    |
| PD6406       | A2ML1 | cna | gain    | BASIS    |
| PD6731       | A2ML1 | cna | hetloss | BASIS    |
| PD7215       | A2ML1 | cna | gain    | BASIS    |
| PD8621       | A2ML1 | cna | gain    | BASIS    |
| PD8980       | A2ML1 | cna | hetloss | BASIS    |
| PD9004       | A2ML1 | cna | gain    | BASIS    |
| PD9702       | A2ML1 | cna | gain    | BASIS    |
| TCGA-A2-A25B | ABCA9 | cna | gain    | TCGA     |
| TCGA-AN-A0XU | ABCA9 | cna | gain    | TCGA     |
| TCGA-AO-A0JL | ABCA9 | cna | hetloss | TCGA     |
| TCGA-BH-A0AW | ABCA9 | cna | amp     | TCGA     |
| TCGA-BH-A0C0 | ABCA9 | cna | gain    | TCGA     |
| TCGA-BH-A18R | ABCA9 | cna | homdel  | TCGA     |

|              |       |     |         |          |
|--------------|-------|-----|---------|----------|
| TCGA-C8-A12L | ABCA9 | cna | gain    | TCGA     |
| TCGA-D8-A27M | ABCA9 | cna | gain    | TCGA     |
| TCGA-EW-A10X | ABCA9 | cna | amp     | TCGA     |
| TCGA-LL-A5YP | ABCA9 | cna | amp     | TCGA     |
| MB-0346      | ABCA9 | cna | gain    | METABRIC |
| MB-5070      | ABCA9 | cna | gain    | METABRIC |
| MB-5107      | ABCA9 | cna | amp     | METABRIC |
| MB-6098      | ABCA9 | cna | gain    | METABRIC |
| MB-6271      | ABCA9 | cna | hetloss | METABRIC |
| MB-7048      | ABCA9 | cna | hetloss | METABRIC |
| MTS-T0064    | ABCA9 | cna | gain    | METABRIC |
| PD11327      | ABCA9 | cna | amp     | BASIS    |
| PD11742      | ABCA9 | cna | gain    | BASIS    |
| PD23561      | ABCA9 | cna | gain    | BASIS    |
| PD23562      | ABCA9 | cna | gain    | BASIS    |
| PD23574      | ABCA9 | cna | gain    | BASIS    |
| PD24186      | ABCA9 | cna | gain    | BASIS    |
| PD24202      | ABCA9 | cna | gain    | BASIS    |
| PD24206      | ABCA9 | cna | hetloss | BASIS    |
| PD24337      | ABCA9 | cna | hetloss | BASIS    |
| PD3890       | ABCA9 | cna | gain    | BASIS    |
| PD3905       | ABCA9 | cna | gain    | BASIS    |
| PD4006       | ABCA9 | cna | gain    | BASIS    |
| PD4107       | ABCA9 | cna | gain    | BASIS    |
| PD4826       | ABCA9 | cna | amp     | BASIS    |
| PD4967       | ABCA9 | cna | hetloss | BASIS    |
| PD5930       | ABCA9 | cna | gain    | BASIS    |
| PD5935       | ABCA9 | cna | gain    | BASIS    |
| PD5945       | ABCA9 | cna | amp     | BASIS    |
| PD5948       | ABCA9 | cna | gain    | BASIS    |
| PD6731       | ABCA9 | cna | hetloss | BASIS    |
| PD7067       | ABCA9 | cna | gain    | BASIS    |
| PD7215       | ABCA9 | cna | gain    | BASIS    |
| PD8980       | ABCA9 | cna | gain    | BASIS    |
| PD9004       | ABCA9 | cna | gain    | BASIS    |
| PD9585       | ABCA9 | cna | gain    | BASIS    |
| PD9702       | ABCA9 | cna | gain    | BASIS    |
| TCGA-AN-A0XU | APC   | cna | hetloss | TCGA     |
| TCGA-AO-A0JL | APC   | cna | hetloss | TCGA     |
| TCGA-BH-A0C0 | APC   | cna | hetloss | TCGA     |
| TCGA-BH-A1FU | APC   | cna | hetloss | TCGA     |
| TCGA-C8-A12L | APC   | cna | hetloss | TCGA     |
| TCGA-D8-A27M | APC   | cna | hetloss | TCGA     |
| TCGA-E2-A1L7 | APC   | cna | gain    | TCGA     |
| TCGA-E9-A1NC | APC   | cna | hetloss | TCGA     |
| TCGA-LL-A5YP | APC   | cna | hetloss | TCGA     |
| MB-0346      | APC   | cna | gain    | METABRIC |

|              |       |     |         |          |
|--------------|-------|-----|---------|----------|
| MB-2827      | APC   | cna | hetloss | METABRIC |
| MB-5070      | APC   | cna | hetloss | METABRIC |
| MB-5107      | APC   | cna | hetloss | METABRIC |
| MB-5465      | APC   | cna | hetloss | METABRIC |
| MB-6060      | APC   | cna | hetloss | METABRIC |
| MB-6098      | APC   | cna | hetloss | METABRIC |
| MB-7038      | APC   | cna | hetloss | METABRIC |
| MB-0420      | APC   | cna | hetloss | METABRIC |
| PD10014      | APC   | cna | hetloss | BASIS    |
| PD13296      | APC   | cna | hetloss | BASIS    |
| PD13297      | APC   | cna | hetloss | BASIS    |
| PD13771      | APC   | cna | gain    | BASIS    |
| PD22355      | APC   | cna | hetloss | BASIS    |
| PD23562      | APC   | cna | hetloss | BASIS    |
| PD24202      | APC   | cna | hetloss | BASIS    |
| PD24206      | APC   | cna | gain    | BASIS    |
| PD24337      | APC   | cna | hetloss | BASIS    |
| PD3890       | APC   | cna | hetloss | BASIS    |
| PD3905       | APC   | cna | gain    | BASIS    |
| PD4005       | APC   | cna | hetloss | BASIS    |
| PD4006       | APC   | cna | hetloss | BASIS    |
| PD4107       | APC   | cna | hetloss | BASIS    |
| PD5930       | APC   | cna | hetloss | BASIS    |
| PD5935       | APC   | cna | hetloss | BASIS    |
| PD5945       | APC   | cna | hetloss | BASIS    |
| PD5948       | APC   | cna | hetloss | BASIS    |
| PD6406       | APC   | cna | hetloss | BASIS    |
| PD6413       | APC   | cna | hetloss | BASIS    |
| PD7067       | APC   | cna | gain    | BASIS    |
| PD8621       | APC   | cna | hetloss | BASIS    |
| PD8980       | APC   | cna | hetloss | BASIS    |
| PD9004       | APC   | cna | gain    | BASIS    |
| PD9585       | APC   | cna | hetloss | BASIS    |
| TCGA-A2-A25B | APH1A | cna | gain    | TCGA     |
| TCGA-AN-A0XU | APH1A | cna | gain    | TCGA     |
| TCGA-AO-A0JL | APH1A | cna | gain    | TCGA     |
| TCGA-BH-A0AW | APH1A | cna | gain    | TCGA     |
| TCGA-BH-A0C0 | APH1A | cna | hetloss | TCGA     |
| TCGA-BH-A18R | APH1A | cna | gain    | TCGA     |
| TCGA-BH-A1FU | APH1A | cna | gain    | TCGA     |
| TCGA-C8-A12L | APH1A | cna | gain    | TCGA     |
| TCGA-E2-A1L7 | APH1A | cna | gain    | TCGA     |
| TCGA-EW-A10X | APH1A | cna | gain    | TCGA     |
| TCGA-LL-A5YP | APH1A | cna | amp     | TCGA     |
| MB-2827      | APH1A | cna | amp     | METABRIC |
| MB-5070      | APH1A | cna | gain    | METABRIC |
| MB-6098      | APH1A | cna | amp     | METABRIC |



|              |       |     |         |          |
|--------------|-------|-----|---------|----------|
| MB-7032      | APH1A | cna | gain    | METABRIC |
| MB-7048      | APH1A | cna | hetloss | METABRIC |
| MB-0420      | APH1A | cna | gain    | METABRIC |
| PD10014      | APH1A | cna | gain    | BASIS    |
| PD11327      | APH1A | cna | gain    | BASIS    |
| PD13297      | APH1A | cna | gain    | BASIS    |
| PD13299      | APH1A | cna | gain    | BASIS    |
| PD14442      | APH1A | cna | gain    | BASIS    |
| PD22355      | APH1A | cna | gain    | BASIS    |
| PD23562      | APH1A | cna | amp     | BASIS    |
| PD23574      | APH1A | cna | gain    | BASIS    |
| PD24186      | APH1A | cna | gain    | BASIS    |
| PD24206      | APH1A | cna | gain    | BASIS    |
| PD3905       | APH1A | cna | gain    | BASIS    |
| PD4005       | APH1A | cna | gain    | BASIS    |
| PD4006       | APH1A | cna | amp     | BASIS    |
| PD4107       | APH1A | cna | gain    | BASIS    |
| PD4826       | APH1A | cna | gain    | BASIS    |
| PD4967       | APH1A | cna | hetloss | BASIS    |
| PD5930       | APH1A | cna | amp     | BASIS    |
| PD5935       | APH1A | cna | gain    | BASIS    |
| PD5945       | APH1A | cna | amp     | BASIS    |
| PD5948       | APH1A | cna | gain    | BASIS    |
| PD6413       | APH1A | cna | gain    | BASIS    |
| PD7067       | APH1A | cna | amp     | BASIS    |
| PD7215       | APH1A | cna | gain    | BASIS    |
| PD8621       | APH1A | cna | amp     | BASIS    |
| PD9004       | APH1A | cna | amp     | BASIS    |
| PD9702       | APH1A | cna | amp     | BASIS    |
| TCGA-A2-A25B | ARNT  | cna | gain    | TCGA     |
| TCGA-AN-A0XU | ARNT  | cna | gain    | TCGA     |
| TCGA-AO-A0JL | ARNT  | cna | gain    | TCGA     |
| TCGA-BH-A0AW | ARNT  | cna | gain    | TCGA     |
| TCGA-BH-A0C0 | ARNT  | cna | hetloss | TCGA     |
| TCGA-BH-A18R | ARNT  | cna | gain    | TCGA     |
| TCGA-BH-A1FU | ARNT  | cna | gain    | TCGA     |
| TCGA-C8-A12L | ARNT  | cna | gain    | TCGA     |
| TCGA-E2-A1L7 | ARNT  | cna | gain    | TCGA     |
| TCGA-EW-A10X | ARNT  | cna | gain    | TCGA     |
| TCGA-LL-A5YP | ARNT  | cna | amp     | TCGA     |
| MB-2827      | ARNT  | cna | amp     | METABRIC |
| MB-5070      | ARNT  | cna | gain    | METABRIC |
| MB-6098      | ARNT  | cna | amp     | METABRIC |
| MB-7032      | ARNT  | cna | gain    | METABRIC |
| MB-7048      | ARNT  | cna | hetloss | METABRIC |
| MB-0420      | ARNT  | cna | gain    | METABRIC |
| PD10014      | ARNT  | cna | gain    | BASIS    |

|              |      |     |         |          |
|--------------|------|-----|---------|----------|
| PD11327      | ARNT | cna | gain    | BASIS    |
| PD13297      | ARNT | cna | gain    | BASIS    |
| PD13299      | ARNT | cna | gain    | BASIS    |
| PD14442      | ARNT | cna | gain    | BASIS    |
| PD22355      | ARNT | cna | gain    | BASIS    |
| PD23562      | ARNT | cna | amp     | BASIS    |
| PD23574      | ARNT | cna | gain    | BASIS    |
| PD24186      | ARNT | cna | gain    | BASIS    |
| PD24206      | ARNT | cna | gain    | BASIS    |
| PD3905       | ARNT | cna | gain    | BASIS    |
| PD4005       | ARNT | cna | gain    | BASIS    |
| PD4006       | ARNT | cna | amp     | BASIS    |
| PD4107       | ARNT | cna | gain    | BASIS    |
| PD4826       | ARNT | cna | gain    | BASIS    |
| PD4967       | ARNT | cna | hetloss | BASIS    |
| PD5930       | ARNT | cna | amp     | BASIS    |
| PD5935       | ARNT | cna | gain    | BASIS    |
| PD5945       | ARNT | cna | amp     | BASIS    |
| PD5948       | ARNT | cna | gain    | BASIS    |
| PD6413       | ARNT | cna | gain    | BASIS    |
| PD7067       | ARNT | cna | amp     | BASIS    |
| PD7215       | ARNT | cna | gain    | BASIS    |
| PD8621       | ARNT | cna | amp     | BASIS    |
| PD9004       | ARNT | cna | amp     | BASIS    |
| PD9702       | ARNT | cna | amp     | BASIS    |
| TCGA-A2-A25B | ATM  | cna | hetloss | TCGA     |
| TCGA-AN-A0XU | ATM  | cna | gain    | TCGA     |
| TCGA-AO-A0JL | ATM  | cna | hetloss | TCGA     |
| TCGA-BH-A0C0 | ATM  | cna | gain    | TCGA     |
| TCGA-BH-A18R | ATM  | cna | homdel  | TCGA     |
| TCGA-D8-A27M | ATM  | cna | hetloss | TCGA     |
| TCGA-E2-A1L7 | ATM  | cna | hetloss | TCGA     |
| TCGA-EW-A10X | ATM  | cna | homdel  | TCGA     |
| TCGA-LL-A5YP | ATM  | cna | hetloss | TCGA     |
| MB-0346      | ATM  | cna | hetloss | METABRIC |
| MB-5070      | ATM  | cna | hetloss | METABRIC |
| MB-5107      | ATM  | cna | hetloss | METABRIC |
| MB-6271      | ATM  | cna | hetloss | METABRIC |
| MB-7032      | ATM  | cna | hetloss | METABRIC |
| MB-7048      | ATM  | cna | hetloss | METABRIC |
| PD11327      | ATM  | cna | hetloss | BASIS    |
| PD11742      | ATM  | cna | hetloss | BASIS    |
| PD13296      | ATM  | cna | hetloss | BASIS    |
| PD13299      | ATM  | cna | gain    | BASIS    |
| PD13771      | ATM  | cna | hetloss | BASIS    |
| PD22355      | ATM  | cna | hetloss | BASIS    |
| PD23574      | ATM  | cna | gain    | BASIS    |

|                   |       |     |         |            |
|-------------------|-------|-----|---------|------------|
| PD23578           | ATM   | cna | hetloss | BASIS      |
| PD24186           | ATM   | cna | gain    | BASIS      |
| PD24202           | ATM   | cna | gain    | BASIS      |
| PD24206           | ATM   | cna | gain    | BASIS      |
| PD24337           | ATM   | cna | hetloss | BASIS      |
| PD3905            | ATM   | cna | gain    | BASIS      |
| PD4005            | ATM   | cna | homdel  | BASIS      |
| PD4006            | ATM   | cna | hetloss | BASIS      |
| PD4107            | ATM   | cna | hetloss | BASIS      |
| PD4826            | ATM   | cna | hetloss | BASIS      |
| PD4967            | ATM   | cna | hetloss | BASIS      |
| PD5935            | ATM   | cna | gain    | BASIS      |
| PD5945            | ATM   | cna | gain    | BASIS      |
| PD5948            | ATM   | cna | gain    | BASIS      |
| PD6413            | ATM   | cna | hetloss | BASIS      |
| PD6731            | ATM   | cna | hetloss | BASIS      |
| PD7067            | ATM   | cna | gain    | BASIS      |
| PD7215            | ATM   | cna | gain    | BASIS      |
| PD9004            | ATM   | cna | hetloss | BASIS      |
| PD9585            | ATM   | cna | gain    | BASIS      |
| PD9702            | ATM   | cna | gain    | BASIS      |
| TCGA-A2-A25B      | AURKA | cna | gain    | TCGA       |
| TCGA-AO-A0JL      | AURKA | cna | gain    | TCGA       |
| TCGA-BH-A0AW      | AURKA | cna | gain    | TCGA       |
| TCGA-BH-A0C0      | AURKA | cna | gain    | TCGA       |
| TCGA-BH-A18R      | AURKA | cna | gain    | TCGA       |
| TCGA-C8-A12L      | AURKA | cna | gain    | TCGA       |
| TCGA-D8-A27M      | AURKA | cna | hetloss | TCGA       |
| TCGA-E2-A1L7      | AURKA | cna | gain    | TCGA       |
| TCGA-LL-A5YP      | AURKA | cna | gain    | TCGA       |
| MB-0346           | AURKA | cna | gain    | METABRIC   |
| MB-5070           | AURKA | cna | hetloss | METABRIC   |
| MB-5107           | AURKA | cna | gain    | METABRIC   |
| MB-6060           | AURKA | cna | gain    | METABRIC   |
| MB-6098           | AURKA | cna | gain    | METABRIC   |
| P-0002858-T01-IM3 | AURKA | cna | amp     | MSK-IMPACT |
| PD11327           | AURKA | cna | hetloss | BASIS      |
| PD13296           | AURKA | cna | gain    | BASIS      |
| PD13297           | AURKA | cna | hetloss | BASIS      |
| PD13299           | AURKA | cna | gain    | BASIS      |
| PD13771           | AURKA | cna | gain    | BASIS      |
| PD22355           | AURKA | cna | gain    | BASIS      |
| PD23562           | AURKA | cna | gain    | BASIS      |
| PD23574           | AURKA | cna | gain    | BASIS      |
| PD23578           | AURKA | cna | gain    | BASIS      |
| PD24186           | AURKA | cna | gain    | BASIS      |
| PD24202           | AURKA | cna | hetloss | BASIS      |

|              |       |     |         |          |
|--------------|-------|-----|---------|----------|
| PD24206      | AURKA | cna | gain    | BASIS    |
| PD3905       | AURKA | cna | gain    | BASIS    |
| PD4005       | AURKA | cna | hetloss | BASIS    |
| PD4006       | AURKA | cna | gain    | BASIS    |
| PD4107       | AURKA | cna | hetloss | BASIS    |
| PD4826       | AURKA | cna | gain    | BASIS    |
| PD5935       | AURKA | cna | gain    | BASIS    |
| PD5945       | AURKA | cna | amp     | BASIS    |
| PD5948       | AURKA | cna | gain    | BASIS    |
| PD6406       | AURKA | cna | gain    | BASIS    |
| PD7067       | AURKA | cna | gain    | BASIS    |
| PD7215       | AURKA | cna | amp     | BASIS    |
| PD8621       | AURKA | cna | gain    | BASIS    |
| PD8980       | AURKA | cna | gain    | BASIS    |
| PD9004       | AURKA | cna | gain    | BASIS    |
| PD9585       | AURKA | cna | hetloss | BASIS    |
| PD9702       | AURKA | cna | gain    | BASIS    |
| TCGA-AN-A0XU | AXIN1 | cna | hetloss | TCGA     |
| TCGA-AO-A0JL | AXIN1 | cna | gain    | TCGA     |
| TCGA-BH-A0AW | AXIN1 | cna | gain    | TCGA     |
| TCGA-BH-A0C0 | AXIN1 | cna | gain    | TCGA     |
| TCGA-C8-A12L | AXIN1 | cna | gain    | TCGA     |
| TCGA-E2-A1L7 | AXIN1 | cna | hetloss | TCGA     |
| TCGA-E9-A1NC | AXIN1 | cna | hetloss | TCGA     |
| TCGA-LL-A5YP | AXIN1 | cna | gain    | TCGA     |
| MB-0346      | AXIN1 | cna | hetloss | METABRIC |
| MB-5465      | AXIN1 | cna | hetloss | METABRIC |
| MB-6271      | AXIN1 | cna | gain    | METABRIC |
| MB-7032      | AXIN1 | cna | gain    | METABRIC |
| MB-0420      | AXIN1 | cna | hetloss | METABRIC |
| PD10014      | AXIN1 | cna | hetloss | BASIS    |
| PD11327      | AXIN1 | cna | gain    | BASIS    |
| PD11742      | AXIN1 | cna | gain    | BASIS    |
| PD13296      | AXIN1 | cna | gain    | BASIS    |
| PD13297      | AXIN1 | cna | hetloss | BASIS    |
| PD13299      | AXIN1 | cna | gain    | BASIS    |
| PD22355      | AXIN1 | cna | hetloss | BASIS    |
| PD23578      | AXIN1 | cna | hetloss | BASIS    |
| PD24202      | AXIN1 | cna | hetloss | BASIS    |
| PD24206      | AXIN1 | cna | gain    | BASIS    |
| PD24337      | AXIN1 | cna | gain    | BASIS    |
| PD3890       | AXIN1 | cna | hetloss | BASIS    |
| PD3905       | AXIN1 | cna | gain    | BASIS    |
| PD4005       | AXIN1 | cna | gain    | BASIS    |
| PD4006       | AXIN1 | cna | gain    | BASIS    |
| PD4107       | AXIN1 | cna | gain    | BASIS    |
| PD4826       | AXIN1 | cna | gain    | BASIS    |

|                   |        |     |         |            |
|-------------------|--------|-----|---------|------------|
| PD4967            | AXIN1  | cna | gain    | BASIS      |
| PD5930            | AXIN1  | cna | gain    | BASIS      |
| PD5935            | AXIN1  | cna | gain    | BASIS      |
| PD5945            | AXIN1  | cna | gain    | BASIS      |
| PD5948            | AXIN1  | cna | gain    | BASIS      |
| PD6406            | AXIN1  | cna | gain    | BASIS      |
| PD6413            | AXIN1  | cna | gain    | BASIS      |
| PD7067            | AXIN1  | cna | gain    | BASIS      |
| PD7215            | AXIN1  | cna | amp     | BASIS      |
| PD8621            | AXIN1  | cna | gain    | BASIS      |
| PD9004            | AXIN1  | cna | gain    | BASIS      |
| PD9585            | AXIN1  | cna | hetloss | BASIS      |
| PD9702            | AXIN1  | cna | gain    | BASIS      |
| TCGA-A2-A25B      | CDKN1B | cna | hetloss | TCGA       |
| TCGA-AN-A0XU      | CDKN1B | cna | hetloss | TCGA       |
| TCGA-AO-A0JL      | CDKN1B | cna | hetloss | TCGA       |
| TCGA-BH-A0C0      | CDKN1B | cna | hetloss | TCGA       |
| TCGA-BH-A18R      | CDKN1B | cna | gain    | TCGA       |
| TCGA-BH-A1FU      | CDKN1B | cna | hetloss | TCGA       |
| TCGA-C8-A12L      | CDKN1B | cna | gain    | TCGA       |
| TCGA-D8-A27M      | CDKN1B | cna | gain    | TCGA       |
| TCGA-LL-A5YP      | CDKN1B | cna | hetloss | TCGA       |
| MB-0346           | CDKN1B | cna | hetloss | METABRIC   |
| MB-5070           | CDKN1B | cna | amp     | METABRIC   |
| MB-5107           | CDKN1B | cna | hetloss | METABRIC   |
| MB-6060           | CDKN1B | cna | gain    | METABRIC   |
| MB-6098           | CDKN1B | cna | gain    | METABRIC   |
| MB-7038           | CDKN1B | cna | hetloss | METABRIC   |
| MB-7048           | CDKN1B | cna | gain    | METABRIC   |
| P-0009557-T01-IM5 | CDKN1B | cna | homdel  | MSK-IMPACT |
| PD10014           | CDKN1B | cna | hetloss | BASIS      |
| PD11327           | CDKN1B | cna | gain    | BASIS      |
| PD11742           | CDKN1B | cna | gain    | BASIS      |
| PD13296           | CDKN1B | cna | hetloss | BASIS      |
| PD13297           | CDKN1B | cna | hetloss | BASIS      |
| PD13299           | CDKN1B | cna | gain    | BASIS      |
| PD13771           | CDKN1B | cna | hetloss | BASIS      |
| PD23574           | CDKN1B | cna | gain    | BASIS      |
| PD24186           | CDKN1B | cna | gain    | BASIS      |
| PD24202           | CDKN1B | cna | hetloss | BASIS      |
| PD3905            | CDKN1B | cna | gain    | BASIS      |
| PD4005            | CDKN1B | cna | hetloss | BASIS      |
| PD4006            | CDKN1B | cna | gain    | BASIS      |
| PD4107            | CDKN1B | cna | gain    | BASIS      |
| PD4826            | CDKN1B | cna | hetloss | BASIS      |
| PD4967            | CDKN1B | cna | hetloss | BASIS      |
| PD5930            | CDKN1B | cna | gain    | BASIS      |

|              |        |     |         |          |
|--------------|--------|-----|---------|----------|
| PD5935       | CDKN1B | cna | gain    | BASIS    |
| PD5945       | CDKN1B | cna | amp     | BASIS    |
| PD6406       | CDKN1B | cna | amp     | BASIS    |
| PD6731       | CDKN1B | cna | hetloss | BASIS    |
| PD7215       | CDKN1B | cna | gain    | BASIS    |
| PD8621       | CDKN1B | cna | gain    | BASIS    |
| PD8980       | CDKN1B | cna | hetloss | BASIS    |
| PD9004       | CDKN1B | cna | gain    | BASIS    |
| PD9702       | CDKN1B | cna | gain    | BASIS    |
| TCGA-A2-A25B | CHD4   | cna | hetloss | TCGA     |
| TCGA-AN-A0XU | CHD4   | cna | gain    | TCGA     |
| TCGA-AO-A0JL | CHD4   | cna | gain    | TCGA     |
| TCGA-BH-A0C0 | CHD4   | cna | hetloss | TCGA     |
| TCGA-BH-A18R | CHD4   | cna | gain    | TCGA     |
| TCGA-BH-A1FU | CHD4   | cna | hetloss | TCGA     |
| TCGA-C8-A12L | CHD4   | cna | gain    | TCGA     |
| TCGA-D8-A27M | CHD4   | cna | gain    | TCGA     |
| TCGA-E9-A1NC | CHD4   | cna | gain    | TCGA     |
| TCGA-LL-A5YP | CHD4   | cna | gain    | TCGA     |
| MB-0346      | CHD4   | cna | hetloss | METABRIC |
| MB-2827      | CHD4   | cna | amp     | METABRIC |
| MB-5070      | CHD4   | cna | amp     | METABRIC |
| MB-5107      | CHD4   | cna | hetloss | METABRIC |
| MB-6098      | CHD4   | cna | gain    | METABRIC |
| MB-7048      | CHD4   | cna | gain    | METABRIC |
| MTS-T0064    | CHD4   | cna | amp     | METABRIC |
| PD10014      | CHD4   | cna | hetloss | BASIS    |
| PD11742      | CHD4   | cna | gain    | BASIS    |
| PD13299      | CHD4   | cna | gain    | BASIS    |
| PD13771      | CHD4   | cna | hetloss | BASIS    |
| PD23574      | CHD4   | cna | gain    | BASIS    |
| PD23578      | CHD4   | cna | gain    | BASIS    |
| PD24186      | CHD4   | cna | gain    | BASIS    |
| PD24206      | CHD4   | cna | hetloss | BASIS    |
| PD24337      | CHD4   | cna | amp     | BASIS    |
| PD3890       | CHD4   | cna | gain    | BASIS    |
| PD3905       | CHD4   | cna | gain    | BASIS    |
| PD4005       | CHD4   | cna | gain    | BASIS    |
| PD4006       | CHD4   | cna | amp     | BASIS    |
| PD4107       | CHD4   | cna | gain    | BASIS    |
| PD4826       | CHD4   | cna | hetloss | BASIS    |
| PD4967       | CHD4   | cna | hetloss | BASIS    |
| PD5930       | CHD4   | cna | gain    | BASIS    |
| PD5935       | CHD4   | cna | gain    | BASIS    |
| PD5945       | CHD4   | cna | amp     | BASIS    |
| PD6406       | CHD4   | cna | gain    | BASIS    |
| PD6731       | CHD4   | cna | hetloss | BASIS    |

|              |      |     |         |          |
|--------------|------|-----|---------|----------|
| PD7215       | CHD4 | cna | gain    | BASIS    |
| PD8621       | CHD4 | cna | gain    | BASIS    |
| PD8980       | CHD4 | cna | hetloss | BASIS    |
| PD9004       | CHD4 | cna | gain    | BASIS    |
| PD9702       | CHD4 | cna | gain    | BASIS    |
| TCGA-AN-A0XU | DKC1 | cna | hetloss | TCGA     |
| TCGA-BH-A0AW | DKC1 | cna | gain    | TCGA     |
| TCGA-BH-A0C0 | DKC1 | cna | gain    | TCGA     |
| TCGA-BH-A1FU | DKC1 | cna | hetloss | TCGA     |
| TCGA-C8-A12L | DKC1 | cna | gain    | TCGA     |
| TCGA-E2-A1L7 | DKC1 | cna | hetloss | TCGA     |
| TCGA-E9-A1NC | DKC1 | cna | gain    | TCGA     |
| TCGA-LL-A5YP | DKC1 | cna | gain    | TCGA     |
| MB-0346      | DKC1 | cna | hetloss | METABRIC |
| MB-2827      | DKC1 | cna | hetloss | METABRIC |
| MB-5465      | DKC1 | cna | hetloss | METABRIC |
| MB-6060      | DKC1 | cna | gain    | METABRIC |
| MB-6098      | DKC1 | cna | hetloss | METABRIC |
| MB-7038      | DKC1 | cna | gain    | METABRIC |
| MTS-T0064    | DKC1 | cna | hetloss | METABRIC |
| PD10014      | DKC1 | cna | hetloss | BASIS    |
| PD13296      | DKC1 | cna | gain    | BASIS    |
| PD13299      | DKC1 | cna | amp     | BASIS    |
| PD13771      | DKC1 | cna | hetloss | BASIS    |
| PD14442      | DKC1 | cna | gain    | BASIS    |
| PD23562      | DKC1 | cna | hetloss | BASIS    |
| PD23574      | DKC1 | cna | gain    | BASIS    |
| PD23578      | DKC1 | cna | hetloss | BASIS    |
| PD24202      | DKC1 | cna | hetloss | BASIS    |
| PD24206      | DKC1 | cna | gain    | BASIS    |
| PD24337      | DKC1 | cna | gain    | BASIS    |
| PD3890       | DKC1 | cna | hetloss | BASIS    |
| PD3905       | DKC1 | cna | gain    | BASIS    |
| PD4005       | DKC1 | cna | gain    | BASIS    |
| PD4006       | DKC1 | cna | gain    | BASIS    |
| PD4107       | DKC1 | cna | gain    | BASIS    |
| PD4826       | DKC1 | cna | gain    | BASIS    |
| PD4967       | DKC1 | cna | gain    | BASIS    |
| PD5930       | DKC1 | cna | gain    | BASIS    |
| PD5935       | DKC1 | cna | gain    | BASIS    |
| PD5945       | DKC1 | cna | amp     | BASIS    |
| PD5948       | DKC1 | cna | gain    | BASIS    |
| PD6406       | DKC1 | cna | gain    | BASIS    |
| PD6413       | DKC1 | cna | gain    | BASIS    |
| PD7215       | DKC1 | cna | amp     | BASIS    |
| PD8621       | DKC1 | cna | amp     | BASIS    |
| PD8980       | DKC1 | cna | gain    | BASIS    |

|              |        |     |         |          |
|--------------|--------|-----|---------|----------|
| PD9004       | DKC1   | cna | gain    | BASIS    |
| TCGA-AN-A0XU | DNAH12 | cna | hetloss | TCGA     |
| TCGA-BH-A0C0 | DNAH12 | cna | hetloss | TCGA     |
| TCGA-BH-A18R | DNAH12 | cna | homdel  | TCGA     |
| TCGA-BH-A1FU | DNAH12 | cna | hetloss | TCGA     |
| TCGA-C8-A12L | DNAH12 | cna | hetloss | TCGA     |
| TCGA-D8-A27M | DNAH12 | cna | hetloss | TCGA     |
| TCGA-E2-A1L7 | DNAH12 | cna | hetloss | TCGA     |
| TCGA-E9-A1NC | DNAH12 | cna | hetloss | TCGA     |
| TCGA-LL-A5YP | DNAH12 | cna | hetloss | TCGA     |
| MB-0346      | DNAH12 | cna | hetloss | METABRIC |
| MB-2827      | DNAH12 | cna | hetloss | METABRIC |
| MB-5465      | DNAH12 | cna | hetloss | METABRIC |
| MB-6098      | DNAH12 | cna | hetloss | METABRIC |
| MB-7048      | DNAH12 | cna | hetloss | METABRIC |
| MB-0420      | DNAH12 | cna | hetloss | METABRIC |
| MTS-T0064    | DNAH12 | cna | hetloss | METABRIC |
| PD10014      | DNAH12 | cna | hetloss | BASIS    |
| PD11327      | DNAH12 | cna | homdel  | BASIS    |
| PD13296      | DNAH12 | cna | hetloss | BASIS    |
| PD13297      | DNAH12 | cna | hetloss | BASIS    |
| PD13299      | DNAH12 | cna | gain    | BASIS    |
| PD13771      | DNAH12 | cna | hetloss | BASIS    |
| PD22355      | DNAH12 | cna | hetloss | BASIS    |
| PD23561      | DNAH12 | cna | hetloss | BASIS    |
| PD23578      | DNAH12 | cna | hetloss | BASIS    |
| PD24202      | DNAH12 | cna | hetloss | BASIS    |
| PD24206      | DNAH12 | cna | hetloss | BASIS    |
| PD24337      | DNAH12 | cna | hetloss | BASIS    |
| PD3890       | DNAH12 | cna | hetloss | BASIS    |
| PD3905       | DNAH12 | cna | gain    | BASIS    |
| PD4005       | DNAH12 | cna | hetloss | BASIS    |
| PD4107       | DNAH12 | cna | gain    | BASIS    |
| PD4826       | DNAH12 | cna | gain    | BASIS    |
| PD5945       | DNAH12 | cna | gain    | BASIS    |
| PD5948       | DNAH12 | cna | hetloss | BASIS    |
| PD6406       | DNAH12 | cna | hetloss | BASIS    |
| PD6413       | DNAH12 | cna | hetloss | BASIS    |
| PD6731       | DNAH12 | cna | hetloss | BASIS    |
| PD7067       | DNAH12 | cna | gain    | BASIS    |
| PD8980       | DNAH12 | cna | hetloss | BASIS    |
| PD9004       | DNAH12 | cna | gain    | BASIS    |
| PD9585       | DNAH12 | cna | hetloss | BASIS    |
| PD9702       | DNAH12 | cna | amp     | BASIS    |
| TCGA-A2-A25B | FGF23  | cna | hetloss | TCGA     |
| TCGA-AN-A0XU | FGF23  | cna | gain    | TCGA     |
| TCGA-AO-A0JL | FGF23  | cna | gain    | TCGA     |



|              |       |     |         |          |
|--------------|-------|-----|---------|----------|
| TCGA-BH-A0C0 | FGF23 | cna | hetloss | TCGA     |
| TCGA-BH-A18R | FGF23 | cna | gain    | TCGA     |
| TCGA-BH-A1FU | FGF23 | cna | hetloss | TCGA     |
| TCGA-C8-A12L | FGF23 | cna | gain    | TCGA     |
| TCGA-D8-A27M | FGF23 | cna | gain    | TCGA     |
| TCGA-E9-A1NC | FGF23 | cna | gain    | TCGA     |
| TCGA-LL-A5YP | FGF23 | cna | gain    | TCGA     |
| MB-0346      | FGF23 | cna | hetloss | METABRIC |
| MB-2827      | FGF23 | cna | amp     | METABRIC |
| MB-5070      | FGF23 | cna | amp     | METABRIC |
| MB-6098      | FGF23 | cna | gain    | METABRIC |
| MB-7048      | FGF23 | cna | gain    | METABRIC |
| MB-0420      | FGF23 | cna | gain    | METABRIC |
| MTS-T0064    | FGF23 | cna | amp     | METABRIC |
| PD10014      | FGF23 | cna | hetloss | BASIS    |
| PD11327      | FGF23 | cna | gain    | BASIS    |
| PD11742      | FGF23 | cna | gain    | BASIS    |
| PD13299      | FGF23 | cna | gain    | BASIS    |
| PD13771      | FGF23 | cna | hetloss | BASIS    |
| PD23562      | FGF23 | cna | gain    | BASIS    |
| PD23574      | FGF23 | cna | gain    | BASIS    |
| PD23578      | FGF23 | cna | gain    | BASIS    |
| PD24186      | FGF23 | cna | gain    | BASIS    |
| PD24206      | FGF23 | cna | gain    | BASIS    |
| PD24337      | FGF23 | cna | gain    | BASIS    |
| PD3890       | FGF23 | cna | gain    | BASIS    |
| PD3905       | FGF23 | cna | gain    | BASIS    |
| PD4005       | FGF23 | cna | gain    | BASIS    |
| PD4006       | FGF23 | cna | amp     | BASIS    |
| PD4107       | FGF23 | cna | gain    | BASIS    |
| PD4826       | FGF23 | cna | hetloss | BASIS    |
| PD5930       | FGF23 | cna | gain    | BASIS    |
| PD5935       | FGF23 | cna | gain    | BASIS    |
| PD5945       | FGF23 | cna | amp     | BASIS    |
| PD6406       | FGF23 | cna | gain    | BASIS    |
| PD6731       | FGF23 | cna | hetloss | BASIS    |
| PD7215       | FGF23 | cna | gain    | BASIS    |
| PD8621       | FGF23 | cna | gain    | BASIS    |
| PD9004       | FGF23 | cna | gain    | BASIS    |
| PD9702       | FGF23 | cna | gain    | BASIS    |
| TCGA-A2-A25B | FGF6  | cna | hetloss | TCGA     |
| TCGA-AN-A0XU | FGF6  | cna | gain    | TCGA     |
| TCGA-AO-A0JL | FGF6  | cna | gain    | TCGA     |
| TCGA-BH-A0C0 | FGF6  | cna | hetloss | TCGA     |
| TCGA-BH-A18R | FGF6  | cna | gain    | TCGA     |
| TCGA-BH-A1FU | FGF6  | cna | hetloss | TCGA     |
| TCGA-C8-A12L | FGF6  | cna | gain    | TCGA     |

|              |      |     |         |          |
|--------------|------|-----|---------|----------|
| TCGA-D8-A27M | FGF6 | cna | gain    | TCGA     |
| TCGA-E9-A1NC | FGF6 | cna | gain    | TCGA     |
| TCGA-LL-A5YP | FGF6 | cna | gain    | TCGA     |
| MB-0346      | FGF6 | cna | hetloss | METABRIC |
| MB-2827      | FGF6 | cna | amp     | METABRIC |
| MB-5070      | FGF6 | cna | amp     | METABRIC |
| MB-6098      | FGF6 | cna | gain    | METABRIC |
| MB-7048      | FGF6 | cna | gain    | METABRIC |
| MB-0420      | FGF6 | cna | gain    | METABRIC |
| MTS-T0064    | FGF6 | cna | amp     | METABRIC |
| PD10014      | FGF6 | cna | hetloss | BASIS    |
| PD11327      | FGF6 | cna | gain    | BASIS    |
| PD11742      | FGF6 | cna | gain    | BASIS    |
| PD13299      | FGF6 | cna | gain    | BASIS    |
| PD13771      | FGF6 | cna | hetloss | BASIS    |
| PD23562      | FGF6 | cna | gain    | BASIS    |
| PD23574      | FGF6 | cna | gain    | BASIS    |
| PD23578      | FGF6 | cna | gain    | BASIS    |
| PD24186      | FGF6 | cna | gain    | BASIS    |
| PD24206      | FGF6 | cna | gain    | BASIS    |
| PD24337      | FGF6 | cna | gain    | BASIS    |
| PD3890       | FGF6 | cna | gain    | BASIS    |
| PD3905       | FGF6 | cna | gain    | BASIS    |
| PD4005       | FGF6 | cna | gain    | BASIS    |
| PD4006       | FGF6 | cna | amp     | BASIS    |
| PD4107       | FGF6 | cna | gain    | BASIS    |
| PD4826       | FGF6 | cna | hetloss | BASIS    |
| PD5930       | FGF6 | cna | gain    | BASIS    |
| PD5935       | FGF6 | cna | gain    | BASIS    |
| PD5945       | FGF6 | cna | amp     | BASIS    |
| PD6406       | FGF6 | cna | gain    | BASIS    |
| PD6731       | FGF6 | cna | hetloss | BASIS    |
| PD7215       | FGF6 | cna | gain    | BASIS    |
| PD8621       | FGF6 | cna | gain    | BASIS    |
| PD9004       | FGF6 | cna | gain    | BASIS    |
| PD9702       | FGF6 | cna | gain    | BASIS    |
| TCGA-A2-A25B | FYN  | cna | hetloss | TCGA     |
| TCGA-AN-A0XU | FYN  | cna | amp     | TCGA     |
| TCGA-AO-A0JL | FYN  | cna | hetloss | TCGA     |
| TCGA-BH-A0AW | FYN  | cna | amp     | TCGA     |
| TCGA-BH-A18R | FYN  | cna | gain    | TCGA     |
| TCGA-C8-A12L | FYN  | cna | gain    | TCGA     |
| TCGA-D8-A27M | FYN  | cna | hetloss | TCGA     |
| TCGA-E2-A1L7 | FYN  | cna | gain    | TCGA     |
| TCGA-LL-A5YP | FYN  | cna | gain    | TCGA     |
| MB-2827      | FYN  | cna | amp     | METABRIC |
| MB-5107      | FYN  | cna | hetloss | METABRIC |

|              |       |     |         |          |
|--------------|-------|-----|---------|----------|
| MB-6098      | FYN   | cna | hetloss | METABRIC |
| MB-7032      | FYN   | cna | hetloss | METABRIC |
| MB-7038      | FYN   | cna | gain    | METABRIC |
| MB-7048      | FYN   | cna | hetloss | METABRIC |
| MB-0420      | FYN   | cna | gain    | METABRIC |
| MTS-T0064    | FYN   | cna | amp     | METABRIC |
| PD11327      | FYN   | cna | gain    | BASIS    |
| PD13296      | FYN   | cna | gain    | BASIS    |
| PD13299      | FYN   | cna | gain    | BASIS    |
| PD13771      | FYN   | cna | hetloss | BASIS    |
| PD22355      | FYN   | cna | gain    | BASIS    |
| PD23562      | FYN   | cna | gain    | BASIS    |
| PD23574      | FYN   | cna | gain    | BASIS    |
| PD24186      | FYN   | cna | gain    | BASIS    |
| PD24206      | FYN   | cna | gain    | BASIS    |
| PD24337      | FYN   | cna | hetloss | BASIS    |
| PD3905       | FYN   | cna | gain    | BASIS    |
| PD4006       | FYN   | cna | gain    | BASIS    |
| PD4107       | FYN   | cna | hetloss | BASIS    |
| PD4826       | FYN   | cna | gain    | BASIS    |
| PD5930       | FYN   | cna | hetloss | BASIS    |
| PD5935       | FYN   | cna | gain    | BASIS    |
| PD5945       | FYN   | cna | amp     | BASIS    |
| PD6406       | FYN   | cna | hetloss | BASIS    |
| PD6731       | FYN   | cna | hetloss | BASIS    |
| PD7067       | FYN   | cna | gain    | BASIS    |
| PD7215       | FYN   | cna | gain    | BASIS    |
| PD8621       | FYN   | cna | gain    | BASIS    |
| PD8980       | FYN   | cna | gain    | BASIS    |
| PD9004       | FYN   | cna | gain    | BASIS    |
| PD9585       | FYN   | cna | hetloss | BASIS    |
| PD9702       | FYN   | cna | gain    | BASIS    |
| TCGA-A2-A25B | GNA13 | cna | amp     | TCGA     |
| TCGA-AN-A0XU | GNA13 | cna | gain    | TCGA     |
| TCGA-AO-A0JL | GNA13 | cna | hetloss | TCGA     |
| TCGA-BH-A0AW | GNA13 | cna | amp     | TCGA     |
| TCGA-BH-A0C0 | GNA13 | cna | gain    | TCGA     |
| TCGA-C8-A12L | GNA13 | cna | gain    | TCGA     |
| TCGA-D8-A27M | GNA13 | cna | hetloss | TCGA     |
| TCGA-EW-A10X | GNA13 | cna | amp     | TCGA     |
| TCGA-LL-A5YP | GNA13 | cna | amp     | TCGA     |
| MB-0346      | GNA13 | cna | gain    | METABRIC |
| MB-2827      | GNA13 | cna | hetloss | METABRIC |
| MB-5070      | GNA13 | cna | gain    | METABRIC |
| MB-5107      | GNA13 | cna | amp     | METABRIC |
| MB-5323      | GNA13 | cna | gain    | METABRIC |
| MB-6060      | GNA13 | cna | amp     | METABRIC |

|              |       |     |         |          |
|--------------|-------|-----|---------|----------|
| MB-6098      | GNA13 | cna | gain    | METABRIC |
| MB-6271      | GNA13 | cna | hetloss | METABRIC |
| MB-7048      | GNA13 | cna | gain    | METABRIC |
| MTS-T0064    | GNA13 | cna | gain    | METABRIC |
| PD11327      | GNA13 | cna | gain    | BASIS    |
| PD11742      | GNA13 | cna | gain    | BASIS    |
| PD22355      | GNA13 | cna | gain    | BASIS    |
| PD23562      | GNA13 | cna | gain    | BASIS    |
| PD23574      | GNA13 | cna | gain    | BASIS    |
| PD24186      | GNA13 | cna | gain    | BASIS    |
| PD24206      | GNA13 | cna | hetloss | BASIS    |
| PD24337      | GNA13 | cna | hetloss | BASIS    |
| PD3890       | GNA13 | cna | gain    | BASIS    |
| PD3905       | GNA13 | cna | gain    | BASIS    |
| PD4006       | GNA13 | cna | amp     | BASIS    |
| PD4107       | GNA13 | cna | gain    | BASIS    |
| PD4967       | GNA13 | cna | homdel  | BASIS    |
| PD5930       | GNA13 | cna | gain    | BASIS    |
| PD5935       | GNA13 | cna | gain    | BASIS    |
| PD5945       | GNA13 | cna | amp     | BASIS    |
| PD5948       | GNA13 | cna | gain    | BASIS    |
| PD6731       | GNA13 | cna | hetloss | BASIS    |
| PD7067       | GNA13 | cna | gain    | BASIS    |
| PD7215       | GNA13 | cna | gain    | BASIS    |
| PD8621       | GNA13 | cna | gain    | BASIS    |
| PD8980       | GNA13 | cna | gain    | BASIS    |
| PD9004       | GNA13 | cna | gain    | BASIS    |
| PD9702       | GNA13 | cna | gain    | BASIS    |
| TCGA-A2-A25B | MLF1  | cna | gain    | TCGA     |
| TCGA-AN-A0XU | MLF1  | cna | gain    | TCGA     |
| TCGA-BH-A0AW | MLF1  | cna | gain    | TCGA     |
| TCGA-BH-A0C0 | MLF1  | cna | gain    | TCGA     |
| TCGA-BH-A18R | MLF1  | cna | gain    | TCGA     |
| TCGA-BH-A1FU | MLF1  | cna | hetloss | TCGA     |
| TCGA-E2-A1L7 | MLF1  | cna | gain    | TCGA     |
| TCGA-E9-A1NC | MLF1  | cna | gain    | TCGA     |
| TCGA-LL-A5YP | MLF1  | cna | gain    | TCGA     |
| MB-0346      | MLF1  | cna | amp     | METABRIC |
| MB-5070      | MLF1  | cna | amp     | METABRIC |
| MB-5107      | MLF1  | cna | amp     | METABRIC |
| MB-5465      | MLF1  | cna | amp     | METABRIC |
| MB-6060      | MLF1  | cna | gain    | METABRIC |
| MB-6098      | MLF1  | cna | gain    | METABRIC |
| MB-7038      | MLF1  | cna | hetloss | METABRIC |
| MB-7048      | MLF1  | cna | hetloss | METABRIC |
| MB-0420      | MLF1  | cna | amp     | METABRIC |
| MTS-T0064    | MLF1  | cna | gain    | METABRIC |

|              |        |     |         |          |
|--------------|--------|-----|---------|----------|
| PD11327      | MLF1   | cna | gain    | BASIS    |
| PD13296      | MLF1   | cna | gain    | BASIS    |
| PD13299      | MLF1   | cna | gain    | BASIS    |
| PD13771      | MLF1   | cna | hetloss | BASIS    |
| PD22355      | MLF1   | cna | gain    | BASIS    |
| PD23561      | MLF1   | cna | hetloss | BASIS    |
| PD23562      | MLF1   | cna | amp     | BASIS    |
| PD23574      | MLF1   | cna | gain    | BASIS    |
| PD23578      | MLF1   | cna | gain    | BASIS    |
| PD24186      | MLF1   | cna | gain    | BASIS    |
| PD24202      | MLF1   | cna | gain    | BASIS    |
| PD24206      | MLF1   | cna | gain    | BASIS    |
| PD3905       | MLF1   | cna | gain    | BASIS    |
| PD4107       | MLF1   | cna | gain    | BASIS    |
| PD5930       | MLF1   | cna | gain    | BASIS    |
| PD5935       | MLF1   | cna | gain    | BASIS    |
| PD5945       | MLF1   | cna | amp     | BASIS    |
| PD5948       | MLF1   | cna | gain    | BASIS    |
| PD6731       | MLF1   | cna | gain    | BASIS    |
| PD7067       | MLF1   | cna | gain    | BASIS    |
| PD7215       | MLF1   | cna | gain    | BASIS    |
| PD8621       | MLF1   | cna | gain    | BASIS    |
| PD8980       | MLF1   | cna | gain    | BASIS    |
| PD9702       | MLF1   | cna | amp     | BASIS    |
| TCGA-A2-A25B | MLLT11 | cna | gain    | TCGA     |
| TCGA-AN-A0XU | MLLT11 | cna | gain    | TCGA     |
| TCGA-AO-A0JL | MLLT11 | cna | gain    | TCGA     |
| TCGA-BH-A0AW | MLLT11 | cna | gain    | TCGA     |
| TCGA-BH-A0C0 | MLLT11 | cna | hetloss | TCGA     |
| TCGA-BH-A18R | MLLT11 | cna | gain    | TCGA     |
| TCGA-BH-A1FU | MLLT11 | cna | gain    | TCGA     |
| TCGA-C8-A12L | MLLT11 | cna | amp     | TCGA     |
| TCGA-E2-A1L7 | MLLT11 | cna | gain    | TCGA     |
| TCGA-EW-A10X | MLLT11 | cna | gain    | TCGA     |
| TCGA-LL-A5YP | MLLT11 | cna | amp     | TCGA     |
| MB-2827      | MLLT11 | cna | amp     | METABRIC |
| MB-5070      | MLLT11 | cna | gain    | METABRIC |
| MB-6098      | MLLT11 | cna | amp     | METABRIC |
| MB-7032      | MLLT11 | cna | gain    | METABRIC |
| MB-7048      | MLLT11 | cna | hetloss | METABRIC |
| MB-0420      | MLLT11 | cna | gain    | METABRIC |
| PD10014      | MLLT11 | cna | gain    | BASIS    |
| PD11327      | MLLT11 | cna | gain    | BASIS    |
| PD13297      | MLLT11 | cna | gain    | BASIS    |
| PD13299      | MLLT11 | cna | gain    | BASIS    |
| PD14442      | MLLT11 | cna | gain    | BASIS    |
| PD22355      | MLLT11 | cna | gain    | BASIS    |

|              |        |     |         |          |
|--------------|--------|-----|---------|----------|
| PD23562      | MLLT11 | cna | amp     | BASIS    |
| PD23574      | MLLT11 | cna | gain    | BASIS    |
| PD24186      | MLLT11 | cna | gain    | BASIS    |
| PD24206      | MLLT11 | cna | gain    | BASIS    |
| PD3905       | MLLT11 | cna | gain    | BASIS    |
| PD4005       | MLLT11 | cna | gain    | BASIS    |
| PD4006       | MLLT11 | cna | amp     | BASIS    |
| PD4107       | MLLT11 | cna | gain    | BASIS    |
| PD4826       | MLLT11 | cna | gain    | BASIS    |
| PD4967       | MLLT11 | cna | hetloss | BASIS    |
| PD5930       | MLLT11 | cna | amp     | BASIS    |
| PD5935       | MLLT11 | cna | gain    | BASIS    |
| PD5945       | MLLT11 | cna | amp     | BASIS    |
| PD5948       | MLLT11 | cna | gain    | BASIS    |
| PD6413       | MLLT11 | cna | gain    | BASIS    |
| PD7067       | MLLT11 | cna | amp     | BASIS    |
| PD7215       | MLLT11 | cna | gain    | BASIS    |
| PD8621       | MLLT11 | cna | amp     | BASIS    |
| PD9004       | MLLT11 | cna | amp     | BASIS    |
| PD9702       | MLLT11 | cna | amp     | BASIS    |
| TCGA-A2-A25B | MYB    | cna | hetloss | TCGA     |
| TCGA-AN-A0XU | MYB    | cna | amp     | TCGA     |
| TCGA-AO-A0JL | MYB    | cna | hetloss | TCGA     |
| TCGA-BH-A0AW | MYB    | cna | amp     | TCGA     |
| TCGA-BH-A0C0 | MYB    | cna | gain    | TCGA     |
| TCGA-BH-A18R | MYB    | cna | gain    | TCGA     |
| TCGA-C8-A12L | MYB    | cna | gain    | TCGA     |
| TCGA-D8-A27M | MYB    | cna | hetloss | TCGA     |
| MB-5070      | MYB    | cna | gain    | METABRIC |
| MB-6098      | MYB    | cna | hetloss | METABRIC |
| MB-7032      | MYB    | cna | hetloss | METABRIC |
| MB-7038      | MYB    | cna | amp     | METABRIC |
| MB-7048      | MYB    | cna | hetloss | METABRIC |
| MB-0420      | MYB    | cna | hetloss | METABRIC |
| PD11327      | MYB    | cna | gain    | BASIS    |
| PD13296      | MYB    | cna | gain    | BASIS    |
| PD13297      | MYB    | cna | gain    | BASIS    |
| PD13299      | MYB    | cna | gain    | BASIS    |
| PD13771      | MYB    | cna | hetloss | BASIS    |
| PD22355      | MYB    | cna | gain    | BASIS    |
| PD23562      | MYB    | cna | gain    | BASIS    |
| PD23574      | MYB    | cna | gain    | BASIS    |
| PD23578      | MYB    | cna | gain    | BASIS    |
| PD24186      | MYB    | cna | gain    | BASIS    |
| PD24202      | MYB    | cna | gain    | BASIS    |
| PD3890       | MYB    | cna | gain    | BASIS    |
| PD3905       | MYB    | cna | gain    | BASIS    |

|              |       |     |         |          |
|--------------|-------|-----|---------|----------|
| PD4005       | MYB   | cna | hetloss | BASIS    |
| PD4006       | MYB   | cna | gain    | BASIS    |
| PD4107       | MYB   | cna | amp     | BASIS    |
| PD4826       | MYB   | cna | gain    | BASIS    |
| PD5935       | MYB   | cna | gain    | BASIS    |
| PD5945       | MYB   | cna | amp     | BASIS    |
| PD5948       | MYB   | cna | gain    | BASIS    |
| PD6406       | MYB   | cna | hetloss | BASIS    |
| PD6731       | MYB   | cna | hetloss | BASIS    |
| PD7067       | MYB   | cna | amp     | BASIS    |
| PD7215       | MYB   | cna | gain    | BASIS    |
| PD8621       | MYB   | cna | gain    | BASIS    |
| PD8980       | MYB   | cna | gain    | BASIS    |
| PD9004       | MYB   | cna | gain    | BASIS    |
| PD9585       | MYB   | cna | hetloss | BASIS    |
| PD9702       | MYB   | cna | gain    | BASIS    |
| TCGA-AN-A0XU | NR3C1 | cna | hetloss | TCGA     |
| TCGA-AO-A0JL | NR3C1 | cna | hetloss | TCGA     |
| TCGA-BH-A0C0 | NR3C1 | cna | hetloss | TCGA     |
| TCGA-BH-A1FU | NR3C1 | cna | hetloss | TCGA     |
| TCGA-C8-A12L | NR3C1 | cna | hetloss | TCGA     |
| TCGA-D8-A27M | NR3C1 | cna | hetloss | TCGA     |
| TCGA-E2-A1L7 | NR3C1 | cna | hetloss | TCGA     |
| TCGA-E9-A1NC | NR3C1 | cna | hetloss | TCGA     |
| TCGA-LL-A5YP | NR3C1 | cna | hetloss | TCGA     |
| MB-0346      | NR3C1 | cna | gain    | METABRIC |
| MB-2827      | NR3C1 | cna | hetloss | METABRIC |
| MB-5070      | NR3C1 | cna | hetloss | METABRIC |
| MB-5465      | NR3C1 | cna | hetloss | METABRIC |
| MB-6098      | NR3C1 | cna | hetloss | METABRIC |
| MB-7038      | NR3C1 | cna | hetloss | METABRIC |
| MB-0420      | NR3C1 | cna | hetloss | METABRIC |
| PD10014      | NR3C1 | cna | hetloss | BASIS    |
| PD11327      | NR3C1 | cna | gain    | BASIS    |
| PD13296      | NR3C1 | cna | hetloss | BASIS    |
| PD13297      | NR3C1 | cna | hetloss | BASIS    |
| PD13771      | NR3C1 | cna | gain    | BASIS    |
| PD22355      | NR3C1 | cna | hetloss | BASIS    |
| PD23562      | NR3C1 | cna | gain    | BASIS    |
| PD23578      | NR3C1 | cna | hetloss | BASIS    |
| PD24186      | NR3C1 | cna | gain    | BASIS    |
| PD24202      | NR3C1 | cna | hetloss | BASIS    |
| PD24206      | NR3C1 | cna | gain    | BASIS    |
| PD24337      | NR3C1 | cna | hetloss | BASIS    |
| PD3890       | NR3C1 | cna | hetloss | BASIS    |
| PD3905       | NR3C1 | cna | gain    | BASIS    |
| PD4005       | NR3C1 | cna | hetloss | BASIS    |

|                   |         |     |         |            |
|-------------------|---------|-----|---------|------------|
| PD4006            | NR3C1   | cna | hetloss | BASIS      |
| PD4107            | NR3C1   | cna | hetloss | BASIS      |
| PD4826            | NR3C1   | cna | gain    | BASIS      |
| PD5935            | NR3C1   | cna | gain    | BASIS      |
| PD5945            | NR3C1   | cna | gain    | BASIS      |
| PD5948            | NR3C1   | cna | hetloss | BASIS      |
| PD6406            | NR3C1   | cna | hetloss | BASIS      |
| PD6413            | NR3C1   | cna | hetloss | BASIS      |
| PD7067            | NR3C1   | cna | gain    | BASIS      |
| PD8980            | NR3C1   | cna | hetloss | BASIS      |
| PD9004            | NR3C1   | cna | gain    | BASIS      |
| PD9585            | NR3C1   | cna | hetloss | BASIS      |
| TCGA-A2-A25B      | PIK3C2G | cna | hetloss | TCGA       |
| TCGA-AN-A0XU      | PIK3C2G | cna | gain    | TCGA       |
| TCGA-AO-A0JL      | PIK3C2G | cna | hetloss | TCGA       |
| TCGA-BH-A0C0      | PIK3C2G | cna | hetloss | TCGA       |
| TCGA-BH-A18R      | PIK3C2G | cna | gain    | TCGA       |
| TCGA-BH-A1FU      | PIK3C2G | cna | hetloss | TCGA       |
| TCGA-C8-A12L      | PIK3C2G | cna | gain    | TCGA       |
| TCGA-D8-A27M      | PIK3C2G | cna | gain    | TCGA       |
| TCGA-E2-A1L7      | PIK3C2G | cna | hetloss | TCGA       |
| TCGA-LL-A5YP      | PIK3C2G | cna | hetloss | TCGA       |
| MB-0346           | PIK3C2G | cna | hetloss | METABRIC   |
| MB-2827           | PIK3C2G | cna | hetloss | METABRIC   |
| MB-5070           | PIK3C2G | cna | gain    | METABRIC   |
| MB-5465           | PIK3C2G | cna | gain    | METABRIC   |
| MB-6098           | PIK3C2G | cna | gain    | METABRIC   |
| MB-7048           | PIK3C2G | cna | gain    | METABRIC   |
| P-0009557-T01-IM5 | PIK3C2G | cna | homdel  | MSK-IMPACT |
| PD10014           | PIK3C2G | cna | gain    | BASIS      |
| PD11327           | PIK3C2G | cna | gain    | BASIS      |
| PD11742           | PIK3C2G | cna | gain    | BASIS      |
| PD13296           | PIK3C2G | cna | hetloss | BASIS      |
| PD13297           | PIK3C2G | cna | hetloss | BASIS      |
| PD13299           | PIK3C2G | cna | gain    | BASIS      |
| PD13771           | PIK3C2G | cna | hetloss | BASIS      |
| PD23574           | PIK3C2G | cna | gain    | BASIS      |
| PD24186           | PIK3C2G | cna | gain    | BASIS      |
| PD3890            | PIK3C2G | cna | hetloss | BASIS      |
| PD3905            | PIK3C2G | cna | gain    | BASIS      |
| PD4005            | PIK3C2G | cna | hetloss | BASIS      |
| PD4006            | PIK3C2G | cna | gain    | BASIS      |
| PD4107            | PIK3C2G | cna | gain    | BASIS      |
| PD4826            | PIK3C2G | cna | hetloss | BASIS      |
| PD5930            | PIK3C2G | cna | gain    | BASIS      |
| PD5935            | PIK3C2G | cna | gain    | BASIS      |
| PD5945            | PIK3C2G | cna | amp     | BASIS      |



|              |         |     |         |          |
|--------------|---------|-----|---------|----------|
| PD5948       | PIK3C2G | cna | hetloss | BASIS    |
| PD6406       | PIK3C2G | cna | gain    | BASIS    |
| PD6731       | PIK3C2G | cna | hetloss | BASIS    |
| PD7215       | PIK3C2G | cna | gain    | BASIS    |
| PD8621       | PIK3C2G | cna | gain    | BASIS    |
| PD8980       | PIK3C2G | cna | hetloss | BASIS    |
| PD9004       | PIK3C2G | cna | amp     | BASIS    |
| PD9702       | PIK3C2G | cna | gain    | BASIS    |
| TCGA-AN-A0XU | RB1     | cna | amp     | TCGA     |
| TCGA-AO-A0JL | RB1     | cna | hetloss | TCGA     |
| TCGA-BH-A0AW | RB1     | cna | hetloss | TCGA     |
| TCGA-BH-A0C0 | RB1     | cna | hetloss | TCGA     |
| TCGA-BH-A1FU | RB1     | cna | hetloss | TCGA     |
| TCGA-C8-A12L | RB1     | cna | gain    | TCGA     |
| TCGA-LL-A5YP | RB1     | cna | homdel  | TCGA     |
| MB-0346      | RB1     | cna | hetloss | METABRIC |
| MB-5107      | RB1     | cna | hetloss | METABRIC |
| MB-6098      | RB1     | cna | hetloss | METABRIC |
| MB-7032      | RB1     | cna | hetloss | METABRIC |
| MB-7038      | RB1     | cna | hetloss | METABRIC |
| MB-7048      | RB1     | cna | hetloss | METABRIC |
| MB-0420      | RB1     | cna | hetloss | METABRIC |
| MTS-T0064    | RB1     | cna | hetloss | METABRIC |
| PD10014      | RB1     | cna | hetloss | BASIS    |
| PD11327      | RB1     | cna | hetloss | BASIS    |
| PD11742      | RB1     | cna | hetloss | BASIS    |
| PD13296      | RB1     | cna | hetloss | BASIS    |
| PD13297      | RB1     | cna | hetloss | BASIS    |
| PD13771      | RB1     | cna | hetloss | BASIS    |
| PD14442      | RB1     | cna | hetloss | BASIS    |
| PD22355      | RB1     | cna | hetloss | BASIS    |
| PD23574      | RB1     | cna | hetloss | BASIS    |
| PD24202      | RB1     | cna | hetloss | BASIS    |
| PD24206      | RB1     | cna | gain    | BASIS    |
| PD3890       | RB1     | cna | hetloss | BASIS    |
| PD3905       | RB1     | cna | gain    | BASIS    |
| PD4005       | RB1     | cna | homdel  | BASIS    |
| PD4006       | RB1     | cna | hetloss | BASIS    |
| PD4826       | RB1     | cna | hetloss | BASIS    |
| PD4967       | RB1     | cna | homdel  | BASIS    |
| PD5945       | RB1     | cna | gain    | BASIS    |
| PD5948       | RB1     | cna | gain    | BASIS    |
| PD6406       | RB1     | cna | hetloss | BASIS    |
| PD6413       | RB1     | cna | hetloss | BASIS    |
| PD6731       | RB1     | cna | hetloss | BASIS    |
| PD7215       | RB1     | cna | gain    | BASIS    |
| PD8621       | RB1     | cna | hetloss | BASIS    |

|              |         |     |         |          |
|--------------|---------|-----|---------|----------|
| PD8980       | RB1     | cna | hetloss | BASIS    |
| PD9004       | RB1     | cna | hetloss | BASIS    |
| PD9585       | RB1     | cna | hetloss | BASIS    |
| PD9702       | RB1     | cna | gain    | BASIS    |
| TCGA-A2-A25B | RPS6KB1 | cna | amp     | TCGA     |
| TCGA-AN-A0XU | RPS6KB1 | cna | gain    | TCGA     |
| TCGA-AO-A0JL | RPS6KB1 | cna | hetloss | TCGA     |
| TCGA-BH-A0AW | RPS6KB1 | cna | amp     | TCGA     |
| TCGA-BH-A0C0 | RPS6KB1 | cna | gain    | TCGA     |
| TCGA-BH-A18R | RPS6KB1 | cna | amp     | TCGA     |
| TCGA-C8-A12L | RPS6KB1 | cna | gain    | TCGA     |
| TCGA-D8-A27M | RPS6KB1 | cna | hetloss | TCGA     |
| TCGA-EW-A10X | RPS6KB1 | cna | amp     | TCGA     |
| TCGA-LL-A5YP | RPS6KB1 | cna | amp     | TCGA     |
| MB-0346      | RPS6KB1 | cna | gain    | METABRIC |
| MB-2827      | RPS6KB1 | cna | hetloss | METABRIC |
| MB-5070      | RPS6KB1 | cna | hetloss | METABRIC |
| MB-5107      | RPS6KB1 | cna | amp     | METABRIC |
| MB-5323      | RPS6KB1 | cna | gain    | METABRIC |
| MB-6060      | RPS6KB1 | cna | amp     | METABRIC |
| MB-6098      | RPS6KB1 | cna | hetloss | METABRIC |
| MB-6271      | RPS6KB1 | cna | hetloss | METABRIC |
| MB-7048      | RPS6KB1 | cna | gain    | METABRIC |
| MTS-T0064    | RPS6KB1 | cna | gain    | METABRIC |
| PD11327      | RPS6KB1 | cna | gain    | BASIS    |
| PD11742      | RPS6KB1 | cna | gain    | BASIS    |
| PD13299      | RPS6KB1 | cna | gain    | BASIS    |
| PD22355      | RPS6KB1 | cna | gain    | BASIS    |
| PD23561      | RPS6KB1 | cna | gain    | BASIS    |
| PD23562      | RPS6KB1 | cna | gain    | BASIS    |
| PD23574      | RPS6KB1 | cna | gain    | BASIS    |
| PD24186      | RPS6KB1 | cna | gain    | BASIS    |
| PD24206      | RPS6KB1 | cna | hetloss | BASIS    |
| PD24337      | RPS6KB1 | cna | hetloss | BASIS    |
| PD3905       | RPS6KB1 | cna | gain    | BASIS    |
| PD4006       | RPS6KB1 | cna | amp     | BASIS    |
| PD4967       | RPS6KB1 | cna | homdel  | BASIS    |
| PD5930       | RPS6KB1 | cna | gain    | BASIS    |
| PD5935       | RPS6KB1 | cna | amp     | BASIS    |
| PD5945       | RPS6KB1 | cna | amp     | BASIS    |
| PD5948       | RPS6KB1 | cna | gain    | BASIS    |
| PD6731       | RPS6KB1 | cna | hetloss | BASIS    |
| PD7067       | RPS6KB1 | cna | gain    | BASIS    |
| PD7215       | RPS6KB1 | cna | gain    | BASIS    |
| PD8980       | RPS6KB1 | cna | gain    | BASIS    |
| PD9004       | RPS6KB1 | cna | gain    | BASIS    |
| PD9702       | RPS6KB1 | cna | gain    | BASIS    |

|              |      |     |         |          |
|--------------|------|-----|---------|----------|
| TCGA-A2-A25B | SKP2 | cna | amp     | TCGA     |
| TCGA-AN-A0XU | SKP2 | cna | gain    | TCGA     |
| TCGA-AO-A0JL | SKP2 | cna | gain    | TCGA     |
| TCGA-BH-A0AW | SKP2 | cna | gain    | TCGA     |
| TCGA-BH-A0C0 | SKP2 | cna | gain    | TCGA     |
| TCGA-BH-A1FU | SKP2 | cna | amp     | TCGA     |
| TCGA-E9-A1NC | SKP2 | cna | hetloss | TCGA     |
| TCGA-LL-A5YP | SKP2 | cna | amp     | TCGA     |
| MB-0346      | SKP2 | cna | gain    | METABRIC |
| MB-5070      | SKP2 | cna | gain    | METABRIC |
| MB-5107      | SKP2 | cna | gain    | METABRIC |
| MB-6060      | SKP2 | cna | gain    | METABRIC |
| MB-6098      | SKP2 | cna | amp     | METABRIC |
| MB-7038      | SKP2 | cna | gain    | METABRIC |
| MB-7048      | SKP2 | cna | hetloss | METABRIC |
| MB-0420      | SKP2 | cna | gain    | METABRIC |
| PD11327      | SKP2 | cna | gain    | BASIS    |
| PD13296      | SKP2 | cna | hetloss | BASIS    |
| PD13299      | SKP2 | cna | gain    | BASIS    |
| PD13771      | SKP2 | cna | hetloss | BASIS    |
| PD23562      | SKP2 | cna | gain    | BASIS    |
| PD23574      | SKP2 | cna | gain    | BASIS    |
| PD24186      | SKP2 | cna | gain    | BASIS    |
| PD24206      | SKP2 | cna | gain    | BASIS    |
| PD24337      | SKP2 | cna | hetloss | BASIS    |
| PD3890       | SKP2 | cna | gain    | BASIS    |
| PD3905       | SKP2 | cna | gain    | BASIS    |
| PD4005       | SKP2 | cna | hetloss | BASIS    |
| PD4006       | SKP2 | cna | gain    | BASIS    |
| PD4107       | SKP2 | cna | gain    | BASIS    |
| PD4826       | SKP2 | cna | gain    | BASIS    |
| PD5930       | SKP2 | cna | gain    | BASIS    |
| PD5935       | SKP2 | cna | hetloss | BASIS    |
| PD5945       | SKP2 | cna | amp     | BASIS    |
| PD5948       | SKP2 | cna | gain    | BASIS    |
| PD6406       | SKP2 | cna | gain    | BASIS    |
| PD6413       | SKP2 | cna | gain    | BASIS    |
| PD6731       | SKP2 | cna | gain    | BASIS    |
| PD7067       | SKP2 | cna | gain    | BASIS    |
| PD7215       | SKP2 | cna | amp     | BASIS    |
| PD8980       | SKP2 | cna | gain    | BASIS    |
| PD9004       | SKP2 | cna | gain    | BASIS    |
| PD9585       | SKP2 | cna | gain    | BASIS    |
| TCGA-A2-A25B | SMC3 | cna | hetloss | TCGA     |
| TCGA-AN-A0XU | SMC3 | cna | hetloss | TCGA     |
| TCGA-AO-A0JL | SMC3 | cna | hetloss | TCGA     |
| TCGA-BH-A18R | SMC3 | cna | gain    | TCGA     |

|              |        |     |         |          |
|--------------|--------|-----|---------|----------|
| TCGA-C8-A12L | SMC3   | cna | hetloss | TCGA     |
| TCGA-D8-A27M | SMC3   | cna | hetloss | TCGA     |
| TCGA-E2-A1L7 | SMC3   | cna | hetloss | TCGA     |
| TCGA-E9-A1NC | SMC3   | cna | hetloss | TCGA     |
| TCGA-LL-A5YP | SMC3   | cna | gain    | TCGA     |
| MB-0346      | SMC3   | cna | hetloss | METABRIC |
| MB-2827      | SMC3   | cna | hetloss | METABRIC |
| MB-5070      | SMC3   | cna | hetloss | METABRIC |
| MB-5465      | SMC3   | cna | amp     | METABRIC |
| MB-6098      | SMC3   | cna | hetloss | METABRIC |
| MB-7038      | SMC3   | cna | hetloss | METABRIC |
| MB-7048      | SMC3   | cna | hetloss | METABRIC |
| MB-0420      | SMC3   | cna | hetloss | METABRIC |
| MTS-T0064    | SMC3   | cna | gain    | METABRIC |
| PD10014      | SMC3   | cna | hetloss | BASIS    |
| PD11327      | SMC3   | cna | gain    | BASIS    |
| PD11742      | SMC3   | cna | hetloss | BASIS    |
| PD13296      | SMC3   | cna | hetloss | BASIS    |
| PD22355      | SMC3   | cna | hetloss | BASIS    |
| PD23562      | SMC3   | cna | gain    | BASIS    |
| PD23574      | SMC3   | cna | gain    | BASIS    |
| PD23578      | SMC3   | cna | hetloss | BASIS    |
| PD24206      | SMC3   | cna | hetloss | BASIS    |
| PD24337      | SMC3   | cna | hetloss | BASIS    |
| PD3905       | SMC3   | cna | gain    | BASIS    |
| PD4005       | SMC3   | cna | hetloss | BASIS    |
| PD4006       | SMC3   | cna | gain    | BASIS    |
| PD4107       | SMC3   | cna | gain    | BASIS    |
| PD5935       | SMC3   | cna | gain    | BASIS    |
| PD5945       | SMC3   | cna | gain    | BASIS    |
| PD5948       | SMC3   | cna | gain    | BASIS    |
| PD6406       | SMC3   | cna | hetloss | BASIS    |
| PD6731       | SMC3   | cna | hetloss | BASIS    |
| PD7067       | SMC3   | cna | gain    | BASIS    |
| PD7215       | SMC3   | cna | gain    | BASIS    |
| PD8621       | SMC3   | cna | gain    | BASIS    |
| PD8980       | SMC3   | cna | hetloss | BASIS    |
| PD9585       | SMC3   | cna | hetloss | BASIS    |
| PD9702       | SMC3   | cna | gain    | BASIS    |
| TCGA-A2-A25B | TRIM24 | cna | gain    | TCGA     |
| TCGA-AO-A0JL | TRIM24 | cna | gain    | TCGA     |
| TCGA-BH-A0AW | TRIM24 | cna | gain    | TCGA     |
| TCGA-D8-A27M | TRIM24 | cna | gain    | TCGA     |
| TCGA-E2-A1L7 | TRIM24 | cna | hetloss | TCGA     |
| TCGA-E9-A1NC | TRIM24 | cna | gain    | TCGA     |
| TCGA-LL-A5YP | TRIM24 | cna | gain    | TCGA     |
| MB-0346      | TRIM24 | cna | gain    | METABRIC |

|              |        |     |         |          |
|--------------|--------|-----|---------|----------|
| MB-2827      | TRIM24 | cna | hetloss | METABRIC |
| MB-5070      | TRIM24 | cna | hetloss | METABRIC |
| MB-5107      | TRIM24 | cna | gain    | METABRIC |
| MB-7038      | TRIM24 | cna | gain    | METABRIC |
| MB-7048      | TRIM24 | cna | gain    | METABRIC |
| PD10014      | TRIM24 | cna | gain    | BASIS    |
| PD13296      | TRIM24 | cna | hetloss | BASIS    |
| PD13297      | TRIM24 | cna | gain    | BASIS    |
| PD13299      | TRIM24 | cna | gain    | BASIS    |
| PD22355      | TRIM24 | cna | hetloss | BASIS    |
| PD23562      | TRIM24 | cna | gain    | BASIS    |
| PD23574      | TRIM24 | cna | gain    | BASIS    |
| PD23578      | TRIM24 | cna | hetloss | BASIS    |
| PD24186      | TRIM24 | cna | amp     | BASIS    |
| PD24202      | TRIM24 | cna | gain    | BASIS    |
| PD24206      | TRIM24 | cna | hetloss | BASIS    |
| PD24337      | TRIM24 | cna | gain    | BASIS    |
| PD3890       | TRIM24 | cna | hetloss | BASIS    |
| PD3905       | TRIM24 | cna | gain    | BASIS    |
| PD4006       | TRIM24 | cna | gain    | BASIS    |
| PD4107       | TRIM24 | cna | gain    | BASIS    |
| PD4826       | TRIM24 | cna | gain    | BASIS    |
| PD4967       | TRIM24 | cna | hetloss | BASIS    |
| PD5930       | TRIM24 | cna | gain    | BASIS    |
| PD5935       | TRIM24 | cna | gain    | BASIS    |
| PD5945       | TRIM24 | cna | amp     | BASIS    |
| PD5948       | TRIM24 | cna | gain    | BASIS    |
| PD6406       | TRIM24 | cna | gain    | BASIS    |
| PD6731       | TRIM24 | cna | hetloss | BASIS    |
| PD7067       | TRIM24 | cna | gain    | BASIS    |
| PD7215       | TRIM24 | cna | gain    | BASIS    |
| PD8621       | TRIM24 | cna | gain    | BASIS    |
| PD9004       | TRIM24 | cna | gain    | BASIS    |
| PD9585       | TRIM24 | cna | gain    | BASIS    |
| PD9702       | TRIM24 | cna | gain    | BASIS    |
| TCGA-AN-A0XU | WDR90  | cna | hetloss | TCGA     |
| TCGA-AO-A0JL | WDR90  | cna | gain    | TCGA     |
| TCGA-BH-A0AW | WDR90  | cna | gain    | TCGA     |
| TCGA-BH-A0C0 | WDR90  | cna | gain    | TCGA     |
| TCGA-C8-A12L | WDR90  | cna | gain    | TCGA     |
| TCGA-E2-A1L7 | WDR90  | cna | hetloss | TCGA     |
| TCGA-E9-A1NC | WDR90  | cna | hetloss | TCGA     |
| TCGA-LL-A5YP | WDR90  | cna | gain    | TCGA     |
| MB-0346      | WDR90  | cna | hetloss | METABRIC |
| MB-5465      | WDR90  | cna | hetloss | METABRIC |
| MB-6271      | WDR90  | cna | gain    | METABRIC |
| MB-7032      | WDR90  | cna | gain    | METABRIC |

|              |        |     |         |          |
|--------------|--------|-----|---------|----------|
| MB-0420      | WDR90  | cna | hetloss | METABRIC |
| PD10014      | WDR90  | cna | hetloss | BASIS    |
| PD11327      | WDR90  | cna | gain    | BASIS    |
| PD11742      | WDR90  | cna | gain    | BASIS    |
| PD13296      | WDR90  | cna | gain    | BASIS    |
| PD13297      | WDR90  | cna | hetloss | BASIS    |
| PD13299      | WDR90  | cna | gain    | BASIS    |
| PD22355      | WDR90  | cna | hetloss | BASIS    |
| PD23578      | WDR90  | cna | hetloss | BASIS    |
| PD24202      | WDR90  | cna | hetloss | BASIS    |
| PD24206      | WDR90  | cna | gain    | BASIS    |
| PD24337      | WDR90  | cna | gain    | BASIS    |
| PD3890       | WDR90  | cna | hetloss | BASIS    |
| PD3905       | WDR90  | cna | gain    | BASIS    |
| PD4005       | WDR90  | cna | gain    | BASIS    |
| PD4006       | WDR90  | cna | gain    | BASIS    |
| PD4107       | WDR90  | cna | gain    | BASIS    |
| PD4826       | WDR90  | cna | gain    | BASIS    |
| PD4967       | WDR90  | cna | gain    | BASIS    |
| PD5930       | WDR90  | cna | gain    | BASIS    |
| PD5935       | WDR90  | cna | gain    | BASIS    |
| PD5945       | WDR90  | cna | gain    | BASIS    |
| PD5948       | WDR90  | cna | gain    | BASIS    |
| PD6406       | WDR90  | cna | gain    | BASIS    |
| PD6413       | WDR90  | cna | gain    | BASIS    |
| PD7067       | WDR90  | cna | gain    | BASIS    |
| PD7215       | WDR90  | cna | amp     | BASIS    |
| PD8621       | WDR90  | cna | gain    | BASIS    |
| PD9004       | WDR90  | cna | gain    | BASIS    |
| PD9585       | WDR90  | cna | hetloss | BASIS    |
| PD9702       | WDR90  | cna | gain    | BASIS    |
| TCGA-A2-A25B | ZNF384 | cna | hetloss | TCGA     |
| TCGA-AN-A0XU | ZNF384 | cna | gain    | TCGA     |
| TCGA-AO-A0JL | ZNF384 | cna | gain    | TCGA     |
| TCGA-BH-A0C0 | ZNF384 | cna | hetloss | TCGA     |
| TCGA-BH-A18R | ZNF384 | cna | gain    | TCGA     |
| TCGA-BH-A1FU | ZNF384 | cna | hetloss | TCGA     |
| TCGA-C8-A12L | ZNF384 | cna | gain    | TCGA     |
| TCGA-D8-A27M | ZNF384 | cna | gain    | TCGA     |
| TCGA-E9-A1NC | ZNF384 | cna | gain    | TCGA     |
| TCGA-LL-A5YP | ZNF384 | cna | gain    | TCGA     |
| MB-0346      | ZNF384 | cna | hetloss | METABRIC |
| MB-2827      | ZNF384 | cna | amp     | METABRIC |
| MB-5070      | ZNF384 | cna | amp     | METABRIC |
| MB-5107      | ZNF384 | cna | hetloss | METABRIC |
| MB-6098      | ZNF384 | cna | gain    | METABRIC |
| MB-7048      | ZNF384 | cna | gain    | METABRIC |

|              |        |     |         |          |
|--------------|--------|-----|---------|----------|
| MTS-T0064    | ZNF384 | cna | amp     | METABRIC |
| PD10014      | ZNF384 | cna | hetloss | BASIS    |
| PD11742      | ZNF384 | cna | gain    | BASIS    |
| PD13299      | ZNF384 | cna | gain    | BASIS    |
| PD13771      | ZNF384 | cna | hetloss | BASIS    |
| PD23574      | ZNF384 | cna | gain    | BASIS    |
| PD23578      | ZNF384 | cna | gain    | BASIS    |
| PD24186      | ZNF384 | cna | gain    | BASIS    |
| PD24206      | ZNF384 | cna | hetloss | BASIS    |
| PD24337      | ZNF384 | cna | amp     | BASIS    |
| PD3890       | ZNF384 | cna | gain    | BASIS    |
| PD3905       | ZNF384 | cna | gain    | BASIS    |
| PD4005       | ZNF384 | cna | gain    | BASIS    |
| PD4006       | ZNF384 | cna | amp     | BASIS    |
| PD4107       | ZNF384 | cna | gain    | BASIS    |
| PD4826       | ZNF384 | cna | hetloss | BASIS    |
| PD4967       | ZNF384 | cna | hetloss | BASIS    |
| PD5930       | ZNF384 | cna | gain    | BASIS    |
| PD5935       | ZNF384 | cna | gain    | BASIS    |
| PD5945       | ZNF384 | cna | amp     | BASIS    |
| PD6406       | ZNF384 | cna | gain    | BASIS    |
| PD6731       | ZNF384 | cna | hetloss | BASIS    |
| PD7215       | ZNF384 | cna | gain    | BASIS    |
| PD8621       | ZNF384 | cna | gain    | BASIS    |
| PD8980       | ZNF384 | cna | hetloss | BASIS    |
| PD9004       | ZNF384 | cna | gain    | BASIS    |
| PD9702       | ZNF384 | cna | gain    | BASIS    |
| TCGA-A2-A25B | AHNAK2 | cna | gain    | TCGA     |
| TCGA-AN-A0XU | AHNAK2 | cna | gain    | TCGA     |
| TCGA-AO-A0JL | AHNAK2 | cna | hetloss | TCGA     |
| TCGA-BH-A0AW | AHNAK2 | cna | hetloss | TCGA     |
| TCGA-BH-A1FU | AHNAK2 | cna | gain    | TCGA     |
| TCGA-C8-A12L | AHNAK2 | cna | gain    | TCGA     |
| TCGA-D8-A27M | AHNAK2 | cna | hetloss | TCGA     |
| TCGA-E2-A1L7 | AHNAK2 | cna | gain    | TCGA     |
| TCGA-E9-A1NC | AHNAK2 | cna | hetloss | TCGA     |
| TCGA-LL-A5YP | AHNAK2 | cna | hetloss | TCGA     |
| MB-0346      | AHNAK2 | cna | gain    | METABRIC |
| MB-2827      | AHNAK2 | cna | hetloss | METABRIC |
| MB-5070      | AHNAK2 | cna | hetloss | METABRIC |
| MB-5107      | AHNAK2 | cna | hetloss | METABRIC |
| MB-6060      | AHNAK2 | cna | gain    | METABRIC |
| MB-6098      | AHNAK2 | cna | gain    | METABRIC |
| MB-7048      | AHNAK2 | cna | gain    | METABRIC |
| MTS-T0064    | AHNAK2 | cna | hetloss | METABRIC |
| PD10014      | AHNAK2 | cna | hetloss | BASIS    |
| PD11742      | AHNAK2 | cna | hetloss | BASIS    |

|              |        |     |         |          |
|--------------|--------|-----|---------|----------|
| PD13296      | AHNAK2 | cna | gain    | BASIS    |
| PD13297      | AHNAK2 | cna | hetloss | BASIS    |
| PD13771      | AHNAK2 | cna | hetloss | BASIS    |
| PD22355      | AHNAK2 | cna | hetloss | BASIS    |
| PD23574      | AHNAK2 | cna | gain    | BASIS    |
| PD23578      | AHNAK2 | cna | hetloss | BASIS    |
| PD24202      | AHNAK2 | cna | hetloss | BASIS    |
| PD24206      | AHNAK2 | cna | gain    | BASIS    |
| PD24337      | AHNAK2 | cna | hetloss | BASIS    |
| PD3890       | AHNAK2 | cna | hetloss | BASIS    |
| PD3905       | AHNAK2 | cna | gain    | BASIS    |
| PD4006       | AHNAK2 | cna | gain    | BASIS    |
| PD4826       | AHNAK2 | cna | gain    | BASIS    |
| PD4967       | AHNAK2 | cna | hetloss | BASIS    |
| PD5945       | AHNAK2 | cna | gain    | BASIS    |
| PD5948       | AHNAK2 | cna | gain    | BASIS    |
| PD6406       | AHNAK2 | cna | hetloss | BASIS    |
| PD6413       | AHNAK2 | cna | hetloss | BASIS    |
| PD7067       | AHNAK2 | cna | gain    | BASIS    |
| PD8621       | AHNAK2 | cna | gain    | BASIS    |
| PD8980       | AHNAK2 | cna | hetloss | BASIS    |
| PD9702       | AHNAK2 | cna | gain    | BASIS    |
| TCGA-A2-A25B | AK9    | cna | hetloss | TCGA     |
| TCGA-AN-A0XU | AK9    | cna | amp     | TCGA     |
| TCGA-AO-A0JL | AK9    | cna | hetloss | TCGA     |
| TCGA-BH-A0AW | AK9    | cna | gain    | TCGA     |
| TCGA-BH-A18R | AK9    | cna | gain    | TCGA     |
| TCGA-C8-A12L | AK9    | cna | gain    | TCGA     |
| TCGA-D8-A27M | AK9    | cna | hetloss | TCGA     |
| TCGA-E2-A1L7 | AK9    | cna | gain    | TCGA     |
| TCGA-LL-A5YP | AK9    | cna | gain    | TCGA     |
| MB-2827      | AK9    | cna | amp     | METABRIC |
| MB-5107      | AK9    | cna | hetloss | METABRIC |
| MB-6098      | AK9    | cna | hetloss | METABRIC |
| MB-7032      | AK9    | cna | hetloss | METABRIC |
| MB-7038      | AK9    | cna | gain    | METABRIC |
| MB-7048      | AK9    | cna | hetloss | METABRIC |
| MTS-T0064    | AK9    | cna | amp     | METABRIC |
| PD11327      | AK9    | cna | gain    | BASIS    |
| PD13296      | AK9    | cna | gain    | BASIS    |
| PD13299      | AK9    | cna | gain    | BASIS    |
| PD13771      | AK9    | cna | hetloss | BASIS    |
| PD22355      | AK9    | cna | gain    | BASIS    |
| PD23562      | AK9    | cna | gain    | BASIS    |
| PD23574      | AK9    | cna | gain    | BASIS    |
| PD24186      | AK9    | cna | gain    | BASIS    |
| PD24206      | AK9    | cna | gain    | BASIS    |



|              |      |     |         |          |
|--------------|------|-----|---------|----------|
| PD24337      | AK9  | cna | hetloss | BASIS    |
| PD3905       | AK9  | cna | gain    | BASIS    |
| PD4006       | AK9  | cna | gain    | BASIS    |
| PD4107       | AK9  | cna | hetloss | BASIS    |
| PD4826       | AK9  | cna | gain    | BASIS    |
| PD5930       | AK9  | cna | hetloss | BASIS    |
| PD5935       | AK9  | cna | gain    | BASIS    |
| PD5945       | AK9  | cna | amp     | BASIS    |
| PD6406       | AK9  | cna | hetloss | BASIS    |
| PD6731       | AK9  | cna | hetloss | BASIS    |
| PD7067       | AK9  | cna | gain    | BASIS    |
| PD7215       | AK9  | cna | gain    | BASIS    |
| PD8621       | AK9  | cna | gain    | BASIS    |
| PD8980       | AK9  | cna | gain    | BASIS    |
| PD9004       | AK9  | cna | gain    | BASIS    |
| PD9585       | AK9  | cna | hetloss | BASIS    |
| PD9702       | AK9  | cna | gain    | BASIS    |
| TCGA-A2-A25B | AKT1 | cna | gain    | TCGA     |
| TCGA-AN-A0XU | AKT1 | cna | gain    | TCGA     |
| TCGA-AO-A0JL | AKT1 | cna | hetloss | TCGA     |
| TCGA-BH-A0AW | AKT1 | cna | hetloss | TCGA     |
| TCGA-BH-A1FU | AKT1 | cna | gain    | TCGA     |
| TCGA-C8-A12L | AKT1 | cna | gain    | TCGA     |
| TCGA-D8-A27M | AKT1 | cna | hetloss | TCGA     |
| TCGA-E2-A1L7 | AKT1 | cna | gain    | TCGA     |
| TCGA-E9-A1NC | AKT1 | cna | hetloss | TCGA     |
| TCGA-LL-A5YP | AKT1 | cna | hetloss | TCGA     |
| MB-0346      | AKT1 | cna | gain    | METABRIC |
| MB-2827      | AKT1 | cna | hetloss | METABRIC |
| MB-5070      | AKT1 | cna | hetloss | METABRIC |
| MB-5107      | AKT1 | cna | hetloss | METABRIC |
| MB-6060      | AKT1 | cna | gain    | METABRIC |
| MB-6098      | AKT1 | cna | gain    | METABRIC |
| MB-7048      | AKT1 | cna | gain    | METABRIC |
| MTS-T0064    | AKT1 | cna | hetloss | METABRIC |
| PD10014      | AKT1 | cna | hetloss | BASIS    |
| PD11742      | AKT1 | cna | hetloss | BASIS    |
| PD13296      | AKT1 | cna | gain    | BASIS    |
| PD13297      | AKT1 | cna | hetloss | BASIS    |
| PD13771      | AKT1 | cna | hetloss | BASIS    |
| PD22355      | AKT1 | cna | hetloss | BASIS    |
| PD23574      | AKT1 | cna | gain    | BASIS    |
| PD23578      | AKT1 | cna | hetloss | BASIS    |
| PD24202      | AKT1 | cna | hetloss | BASIS    |
| PD24206      | AKT1 | cna | gain    | BASIS    |
| PD24337      | AKT1 | cna | hetloss | BASIS    |
| PD3890       | AKT1 | cna | hetloss | BASIS    |

|              |        |     |         |          |
|--------------|--------|-----|---------|----------|
| PD3905       | AKT1   | cna | gain    | BASIS    |
| PD4006       | AKT1   | cna | gain    | BASIS    |
| PD4826       | AKT1   | cna | gain    | BASIS    |
| PD4967       | AKT1   | cna | hetloss | BASIS    |
| PD5945       | AKT1   | cna | gain    | BASIS    |
| PD5948       | AKT1   | cna | gain    | BASIS    |
| PD6406       | AKT1   | cna | hetloss | BASIS    |
| PD6413       | AKT1   | cna | hetloss | BASIS    |
| PD7067       | AKT1   | cna | gain    | BASIS    |
| PD8621       | AKT1   | cna | gain    | BASIS    |
| PD8980       | AKT1   | cna | hetloss | BASIS    |
| PD9702       | AKT1   | cna | gain    | BASIS    |
| TCGA-A2-A25B | ARID1B | cna | hetloss | TCGA     |
| TCGA-AN-A0XU | ARID1B | cna | gain    | TCGA     |
| TCGA-AO-A0JL | ARID1B | cna | hetloss | TCGA     |
| TCGA-BH-A0AW | ARID1B | cna | amp     | TCGA     |
| TCGA-BH-A0C0 | ARID1B | cna | gain    | TCGA     |
| TCGA-C8-A12L | ARID1B | cna | gain    | TCGA     |
| TCGA-D8-A27M | ARID1B | cna | hetloss | TCGA     |
| TCGA-E9-A1NC | ARID1B | cna | hetloss | TCGA     |
| MB-2827      | ARID1B | cna | hetloss | METABRIC |
| MB-5070      | ARID1B | cna | gain    | METABRIC |
| MB-5107      | ARID1B | cna | hetloss | METABRIC |
| MB-6098      | ARID1B | cna | hetloss | METABRIC |
| MB-7048      | ARID1B | cna | hetloss | METABRIC |
| MB-0420      | ARID1B | cna | hetloss | METABRIC |
| MTS-T0064    | ARID1B | cna | hetloss | METABRIC |
| PD10014      | ARID1B | cna | hetloss | BASIS    |
| PD11327      | ARID1B | cna | gain    | BASIS    |
| PD13296      | ARID1B | cna | homdel  | BASIS    |
| PD13297      | ARID1B | cna | hetloss | BASIS    |
| PD13299      | ARID1B | cna | gain    | BASIS    |
| PD22355      | ARID1B | cna | gain    | BASIS    |
| PD23562      | ARID1B | cna | gain    | BASIS    |
| PD23574      | ARID1B | cna | gain    | BASIS    |
| PD24186      | ARID1B | cna | gain    | BASIS    |
| PD3890       | ARID1B | cna | hetloss | BASIS    |
| PD3905       | ARID1B | cna | gain    | BASIS    |
| PD4005       | ARID1B | cna | hetloss | BASIS    |
| PD4006       | ARID1B | cna | gain    | BASIS    |
| PD4107       | ARID1B | cna | gain    | BASIS    |
| PD4826       | ARID1B | cna | gain    | BASIS    |
| PD4967       | ARID1B | cna | hetloss | BASIS    |
| PD5935       | ARID1B | cna | amp     | BASIS    |
| PD5945       | ARID1B | cna | gain    | BASIS    |
| PD6406       | ARID1B | cna | hetloss | BASIS    |
| PD6413       | ARID1B | cna | hetloss | BASIS    |

|              |        |     |         |          |
|--------------|--------|-----|---------|----------|
| PD6731       | ARID1B | cna | hetloss | BASIS    |
| PD7067       | ARID1B | cna | amp     | BASIS    |
| PD7215       | ARID1B | cna | gain    | BASIS    |
| PD8980       | ARID1B | cna | gain    | BASIS    |
| PD9004       | ARID1B | cna | gain    | BASIS    |
| PD9585       | ARID1B | cna | hetloss | BASIS    |
| PD9702       | ARID1B | cna | gain    | BASIS    |
| TCGA-A2-A25B | ATN1   | cna | hetloss | TCGA     |
| TCGA-AN-A0XU | ATN1   | cna | gain    | TCGA     |
| TCGA-AO-A0JL | ATN1   | cna | gain    | TCGA     |
| TCGA-BH-A0C0 | ATN1   | cna | hetloss | TCGA     |
| TCGA-BH-A18R | ATN1   | cna | gain    | TCGA     |
| TCGA-BH-A1FU | ATN1   | cna | hetloss | TCGA     |
| TCGA-C8-A12L | ATN1   | cna | gain    | TCGA     |
| TCGA-D8-A27M | ATN1   | cna | gain    | TCGA     |
| TCGA-E9-A1NC | ATN1   | cna | gain    | TCGA     |
| TCGA-LL-A5YP | ATN1   | cna | gain    | TCGA     |
| MB-0346      | ATN1   | cna | hetloss | METABRIC |
| MB-5070      | ATN1   | cna | amp     | METABRIC |
| MB-5107      | ATN1   | cna | hetloss | METABRIC |
| MB-6098      | ATN1   | cna | gain    | METABRIC |
| MB-7048      | ATN1   | cna | gain    | METABRIC |
| MTS-T0064    | ATN1   | cna | amp     | METABRIC |
| PD10014      | ATN1   | cna | hetloss | BASIS    |
| PD11742      | ATN1   | cna | gain    | BASIS    |
| PD13299      | ATN1   | cna | gain    | BASIS    |
| PD13771      | ATN1   | cna | hetloss | BASIS    |
| PD23574      | ATN1   | cna | gain    | BASIS    |
| PD23578      | ATN1   | cna | gain    | BASIS    |
| PD24186      | ATN1   | cna | gain    | BASIS    |
| PD24206      | ATN1   | cna | hetloss | BASIS    |
| PD24337      | ATN1   | cna | amp     | BASIS    |
| PD3890       | ATN1   | cna | gain    | BASIS    |
| PD3905       | ATN1   | cna | gain    | BASIS    |
| PD4005       | ATN1   | cna | hetloss | BASIS    |
| PD4006       | ATN1   | cna | amp     | BASIS    |
| PD4107       | ATN1   | cna | gain    | BASIS    |
| PD4826       | ATN1   | cna | hetloss | BASIS    |
| PD4967       | ATN1   | cna | hetloss | BASIS    |
| PD5930       | ATN1   | cna | gain    | BASIS    |
| PD5935       | ATN1   | cna | gain    | BASIS    |
| PD5945       | ATN1   | cna | amp     | BASIS    |
| PD6406       | ATN1   | cna | gain    | BASIS    |
| PD6731       | ATN1   | cna | hetloss | BASIS    |
| PD7215       | ATN1   | cna | gain    | BASIS    |
| PD8621       | ATN1   | cna | gain    | BASIS    |
| PD8980       | ATN1   | cna | hetloss | BASIS    |

|              |      |     |         |          |
|--------------|------|-----|---------|----------|
| PD9004       | ATN1 | cna | gain    | BASIS    |
| PD9702       | ATN1 | cna | gain    | BASIS    |
| TCGA-AN-A0XU | B2M  | cna | hetloss | TCGA     |
| TCGA-AO-A0JL | B2M  | cna | hetloss | TCGA     |
| TCGA-BH-A0AW | B2M  | cna | hetloss | TCGA     |
| TCGA-BH-A0C0 | B2M  | cna | hetloss | TCGA     |
| TCGA-BH-A18R | B2M  | cna | gain    | TCGA     |
| TCGA-C8-A12L | B2M  | cna | hetloss | TCGA     |
| TCGA-D8-A27M | B2M  | cna | hetloss | TCGA     |
| TCGA-E2-A1L7 | B2M  | cna | hetloss | TCGA     |
| TCGA-E9-A1NC | B2M  | cna | hetloss | TCGA     |
| TCGA-LL-A5YP | B2M  | cna | hetloss | TCGA     |
| MB-0346      | B2M  | cna | gain    | METABRIC |
| MB-2827      | B2M  | cna | hetloss | METABRIC |
| MB-5107      | B2M  | cna | gain    | METABRIC |
| MB-5465      | B2M  | cna | hetloss | METABRIC |
| MB-6060      | B2M  | cna | hetloss | METABRIC |
| MB-6098      | B2M  | cna | hetloss | METABRIC |
| MB-7048      | B2M  | cna | hetloss | METABRIC |
| MB-0420      | B2M  | cna | hetloss | METABRIC |
| PD10014      | B2M  | cna | hetloss | BASIS    |
| PD11327      | B2M  | cna | hetloss | BASIS    |
| PD11742      | B2M  | cna | hetloss | BASIS    |
| PD13296      | B2M  | cna | homdel  | BASIS    |
| PD13297      | B2M  | cna | hetloss | BASIS    |
| PD13299      | B2M  | cna | hetloss | BASIS    |
| PD22355      | B2M  | cna | hetloss | BASIS    |
| PD23574      | B2M  | cna | hetloss | BASIS    |
| PD23578      | B2M  | cna | hetloss | BASIS    |
| PD24202      | B2M  | cna | hetloss | BASIS    |
| PD24337      | B2M  | cna | hetloss | BASIS    |
| PD3890       | B2M  | cna | hetloss | BASIS    |
| PD3905       | B2M  | cna | gain    | BASIS    |
| PD4005       | B2M  | cna | homdel  | BASIS    |
| PD4967       | B2M  | cna | hetloss | BASIS    |
| PD5930       | B2M  | cna | hetloss | BASIS    |
| PD5948       | B2M  | cna | hetloss | BASIS    |
| PD6406       | B2M  | cna | hetloss | BASIS    |
| PD6413       | B2M  | cna | hetloss | BASIS    |
| PD7067       | B2M  | cna | gain    | BASIS    |
| PD7215       | B2M  | cna | gain    | BASIS    |
| PD8980       | B2M  | cna | hetloss | BASIS    |
| PD9585       | B2M  | cna | hetloss | BASIS    |
| PD9702       | B2M  | cna | gain    | BASIS    |
| TCGA-AN-A0XU | BAP1 | cna | hetloss | TCGA     |
| TCGA-BH-A0C0 | BAP1 | cna | hetloss | TCGA     |
| TCGA-BH-A18R | BAP1 | cna | homdel  | TCGA     |

|              |        |     |         |          |
|--------------|--------|-----|---------|----------|
| TCGA-BH-A1FU | BAP1   | cna | hetloss | TCGA     |
| TCGA-C8-A12L | BAP1   | cna | hetloss | TCGA     |
| TCGA-D8-A27M | BAP1   | cna | hetloss | TCGA     |
| TCGA-E2-A1L7 | BAP1   | cna | hetloss | TCGA     |
| TCGA-E9-A1NC | BAP1   | cna | hetloss | TCGA     |
| TCGA-LL-A5YP | BAP1   | cna | hetloss | TCGA     |
| MB-0346      | BAP1   | cna | hetloss | METABRIC |
| MB-2827      | BAP1   | cna | hetloss | METABRIC |
| MB-5465      | BAP1   | cna | hetloss | METABRIC |
| MB-6098      | BAP1   | cna | hetloss | METABRIC |
| MB-7038      | BAP1   | cna | hetloss | METABRIC |
| MB-7048      | BAP1   | cna | hetloss | METABRIC |
| MB-0420      | BAP1   | cna | hetloss | METABRIC |
| MTS-T0064    | BAP1   | cna | hetloss | METABRIC |
| PD10014      | BAP1   | cna | hetloss | BASIS    |
| PD11327      | BAP1   | cna | hetloss | BASIS    |
| PD13296      | BAP1   | cna | hetloss | BASIS    |
| PD13297      | BAP1   | cna | hetloss | BASIS    |
| PD13299      | BAP1   | cna | gain    | BASIS    |
| PD13771      | BAP1   | cna | hetloss | BASIS    |
| PD14442      | BAP1   | cna | hetloss | BASIS    |
| PD22355      | BAP1   | cna | hetloss | BASIS    |
| PD23561      | BAP1   | cna | hetloss | BASIS    |
| PD23578      | BAP1   | cna | hetloss | BASIS    |
| PD24202      | BAP1   | cna | hetloss | BASIS    |
| PD24206      | BAP1   | cna | hetloss | BASIS    |
| PD24337      | BAP1   | cna | hetloss | BASIS    |
| PD3890       | BAP1   | cna | hetloss | BASIS    |
| PD3905       | BAP1   | cna | gain    | BASIS    |
| PD4005       | BAP1   | cna | hetloss | BASIS    |
| PD4826       | BAP1   | cna | gain    | BASIS    |
| PD4967       | BAP1   | cna | hetloss | BASIS    |
| PD5945       | BAP1   | cna | gain    | BASIS    |
| PD6406       | BAP1   | cna | hetloss | BASIS    |
| PD6413       | BAP1   | cna | hetloss | BASIS    |
| PD6731       | BAP1   | cna | hetloss | BASIS    |
| PD7067       | BAP1   | cna | gain    | BASIS    |
| PD8980       | BAP1   | cna | hetloss | BASIS    |
| PD9585       | BAP1   | cna | hetloss | BASIS    |
| TCGA-A2-A25B | BCL11B | cna | hetloss | TCGA     |
| TCGA-AN-A0XU | BCL11B | cna | hetloss | TCGA     |
| TCGA-AO-A0JL | BCL11B | cna | hetloss | TCGA     |
| TCGA-BH-A0AW | BCL11B | cna | hetloss | TCGA     |
| TCGA-BH-A1FU | BCL11B | cna | gain    | TCGA     |
| TCGA-C8-A12L | BCL11B | cna | gain    | TCGA     |
| TCGA-D8-A27M | BCL11B | cna | hetloss | TCGA     |
| TCGA-E2-A1L7 | BCL11B | cna | gain    | TCGA     |

|              |        |     |         |          |
|--------------|--------|-----|---------|----------|
| TCGA-E9-A1NC | BCL11B | cna | hetloss | TCGA     |
| TCGA-LL-A5YP | BCL11B | cna | hetloss | TCGA     |
| MB-0346      | BCL11B | cna | gain    | METABRIC |
| MB-2827      | BCL11B | cna | hetloss | METABRIC |
| MB-5070      | BCL11B | cna | hetloss | METABRIC |
| MB-5107      | BCL11B | cna | hetloss | METABRIC |
| MB-6098      | BCL11B | cna | hetloss | METABRIC |
| MTS-T0064    | BCL11B | cna | hetloss | METABRIC |
| PD10014      | BCL11B | cna | hetloss | BASIS    |
| PD11327      | BCL11B | cna | amp     | BASIS    |
| PD11742      | BCL11B | cna | hetloss | BASIS    |
| PD13296      | BCL11B | cna | gain    | BASIS    |
| PD13297      | BCL11B | cna | hetloss | BASIS    |
| PD13771      | BCL11B | cna | hetloss | BASIS    |
| PD22355      | BCL11B | cna | hetloss | BASIS    |
| PD23562      | BCL11B | cna | gain    | BASIS    |
| PD23574      | BCL11B | cna | gain    | BASIS    |
| PD23578      | BCL11B | cna | hetloss | BASIS    |
| PD24202      | BCL11B | cna | hetloss | BASIS    |
| PD24206      | BCL11B | cna | gain    | BASIS    |
| PD24337      | BCL11B | cna | hetloss | BASIS    |
| PD3890       | BCL11B | cna | hetloss | BASIS    |
| PD3905       | BCL11B | cna | gain    | BASIS    |
| PD4005       | BCL11B | cna | hetloss | BASIS    |
| PD4006       | BCL11B | cna | gain    | BASIS    |
| PD4826       | BCL11B | cna | gain    | BASIS    |
| PD5945       | BCL11B | cna | gain    | BASIS    |
| PD5948       | BCL11B | cna | gain    | BASIS    |
| PD6406       | BCL11B | cna | hetloss | BASIS    |
| PD6413       | BCL11B | cna | hetloss | BASIS    |
| PD7067       | BCL11B | cna | gain    | BASIS    |
| PD8621       | BCL11B | cna | gain    | BASIS    |
| PD8980       | BCL11B | cna | hetloss | BASIS    |
| PD9702       | BCL11B | cna | gain    | BASIS    |
| TCGA-A2-A25B | BTK    | cna | hetloss | TCGA     |
| TCGA-AN-A0XU | BTK    | cna | hetloss | TCGA     |
| TCGA-AO-A0JL | BTK    | cna | hetloss | TCGA     |
| TCGA-BH-A0AW | BTK    | cna | gain    | TCGA     |
| TCGA-C8-A12L | BTK    | cna | hetloss | TCGA     |
| TCGA-E2-A1L7 | BTK    | cna | hetloss | TCGA     |
| TCGA-E9-A1NC | BTK    | cna | hetloss | TCGA     |
| MB-0346      | BTK    | cna | hetloss | METABRIC |
| MB-2827      | BTK    | cna | hetloss | METABRIC |
| MB-5465      | BTK    | cna | gain    | METABRIC |
| MB-6060      | BTK    | cna | hetloss | METABRIC |
| MB-6098      | BTK    | cna | hetloss | METABRIC |
| MB-0420      | BTK    | cna | hetloss | METABRIC |

|              |       |     |         |          |
|--------------|-------|-----|---------|----------|
| PD10014      | BTK   | cna | hetloss | BASIS    |
| PD11327      | BTK   | cna | hetloss | BASIS    |
| PD13296      | BTK   | cna | hetloss | BASIS    |
| PD13299      | BTK   | cna | amp     | BASIS    |
| PD13771      | BTK   | cna | gain    | BASIS    |
| PD14442      | BTK   | cna | gain    | BASIS    |
| PD22355      | BTK   | cna | gain    | BASIS    |
| PD23562      | BTK   | cna | hetloss | BASIS    |
| PD23574      | BTK   | cna | gain    | BASIS    |
| PD23578      | BTK   | cna | hetloss | BASIS    |
| PD24202      | BTK   | cna | hetloss | BASIS    |
| PD24206      | BTK   | cna | gain    | BASIS    |
| PD3905       | BTK   | cna | amp     | BASIS    |
| PD4005       | BTK   | cna | hetloss | BASIS    |
| PD4006       | BTK   | cna | gain    | BASIS    |
| PD4107       | BTK   | cna | gain    | BASIS    |
| PD4826       | BTK   | cna | gain    | BASIS    |
| PD4967       | BTK   | cna | gain    | BASIS    |
| PD5930       | BTK   | cna | gain    | BASIS    |
| PD5935       | BTK   | cna | gain    | BASIS    |
| PD5945       | BTK   | cna | gain    | BASIS    |
| PD5948       | BTK   | cna | gain    | BASIS    |
| PD6406       | BTK   | cna | gain    | BASIS    |
| PD6413       | BTK   | cna | gain    | BASIS    |
| PD7067       | BTK   | cna | gain    | BASIS    |
| PD7215       | BTK   | cna | gain    | BASIS    |
| PD8621       | BTK   | cna | amp     | BASIS    |
| PD8980       | BTK   | cna | hetloss | BASIS    |
| PD9004       | BTK   | cna | gain    | BASIS    |
| TCGA-A2-A25B | CCND2 | cna | hetloss | TCGA     |
| TCGA-AN-A0XU | CCND2 | cna | gain    | TCGA     |
| TCGA-AO-A0JL | CCND2 | cna | gain    | TCGA     |
| TCGA-BH-A0C0 | CCND2 | cna | hetloss | TCGA     |
| TCGA-BH-A18R | CCND2 | cna | gain    | TCGA     |
| TCGA-BH-A1FU | CCND2 | cna | hetloss | TCGA     |
| TCGA-C8-A12L | CCND2 | cna | gain    | TCGA     |
| TCGA-D8-A27M | CCND2 | cna | gain    | TCGA     |
| TCGA-E9-A1NC | CCND2 | cna | gain    | TCGA     |
| TCGA-LL-A5YP | CCND2 | cna | gain    | TCGA     |
| MB-0346      | CCND2 | cna | hetloss | METABRIC |
| MB-2827      | CCND2 | cna | amp     | METABRIC |
| MB-5070      | CCND2 | cna | amp     | METABRIC |
| MB-6098      | CCND2 | cna | gain    | METABRIC |
| MB-7048      | CCND2 | cna | gain    | METABRIC |
| MB-0420      | CCND2 | cna | gain    | METABRIC |
| MTS-T0064    | CCND2 | cna | amp     | METABRIC |
| PD10014      | CCND2 | cna | hetloss | BASIS    |

|              |       |     |         |          |
|--------------|-------|-----|---------|----------|
| PD11327      | CCND2 | cna | gain    | BASIS    |
| PD11742      | CCND2 | cna | gain    | BASIS    |
| PD13299      | CCND2 | cna | gain    | BASIS    |
| PD13771      | CCND2 | cna | hetloss | BASIS    |
| PD23562      | CCND2 | cna | gain    | BASIS    |
| PD23574      | CCND2 | cna | gain    | BASIS    |
| PD23578      | CCND2 | cna | gain    | BASIS    |
| PD24186      | CCND2 | cna | gain    | BASIS    |
| PD24337      | CCND2 | cna | gain    | BASIS    |
| PD3890       | CCND2 | cna | gain    | BASIS    |
| PD3905       | CCND2 | cna | gain    | BASIS    |
| PD4005       | CCND2 | cna | gain    | BASIS    |
| PD4006       | CCND2 | cna | amp     | BASIS    |
| PD4107       | CCND2 | cna | gain    | BASIS    |
| PD4826       | CCND2 | cna | hetloss | BASIS    |
| PD5930       | CCND2 | cna | gain    | BASIS    |
| PD5935       | CCND2 | cna | gain    | BASIS    |
| PD5945       | CCND2 | cna | amp     | BASIS    |
| PD6406       | CCND2 | cna | gain    | BASIS    |
| PD6731       | CCND2 | cna | hetloss | BASIS    |
| PD7215       | CCND2 | cna | gain    | BASIS    |
| PD8621       | CCND2 | cna | gain    | BASIS    |
| PD9004       | CCND2 | cna | gain    | BASIS    |
| PD9702       | CCND2 | cna | gain    | BASIS    |
| TCGA-A2-A25B | CLTC  | cna | amp     | TCGA     |
| TCGA-AN-A0XU | CLTC  | cna | gain    | TCGA     |
| TCGA-AO-A0JL | CLTC  | cna | hetloss | TCGA     |
| TCGA-BH-A0AW | CLTC  | cna | amp     | TCGA     |
| TCGA-BH-A0C0 | CLTC  | cna | gain    | TCGA     |
| TCGA-BH-A18R | CLTC  | cna | amp     | TCGA     |
| TCGA-C8-A12L | CLTC  | cna | gain    | TCGA     |
| TCGA-D8-A27M | CLTC  | cna | hetloss | TCGA     |
| TCGA-EW-A10X | CLTC  | cna | amp     | TCGA     |
| MB-0346      | CLTC  | cna | gain    | METABRIC |
| MB-2827      | CLTC  | cna | hetloss | METABRIC |
| MB-5070      | CLTC  | cna | hetloss | METABRIC |
| MB-5107      | CLTC  | cna | amp     | METABRIC |
| MB-5323      | CLTC  | cna | gain    | METABRIC |
| MB-6060      | CLTC  | cna | amp     | METABRIC |
| MB-6098      | CLTC  | cna | hetloss | METABRIC |
| MB-6271      | CLTC  | cna | hetloss | METABRIC |
| MB-7048      | CLTC  | cna | gain    | METABRIC |
| MTS-T0064    | CLTC  | cna | gain    | METABRIC |
| PD11327      | CLTC  | cna | gain    | BASIS    |
| PD11742      | CLTC  | cna | gain    | BASIS    |
| PD13299      | CLTC  | cna | gain    | BASIS    |
| PD22355      | CLTC  | cna | gain    | BASIS    |



|              |         |     |         |          |
|--------------|---------|-----|---------|----------|
| PD23561      | CLTC    | cna | gain    | BASIS    |
| PD23562      | CLTC    | cna | gain    | BASIS    |
| PD23574      | CLTC    | cna | gain    | BASIS    |
| PD24186      | CLTC    | cna | gain    | BASIS    |
| PD24337      | CLTC    | cna | hetloss | BASIS    |
| PD3905       | CLTC    | cna | gain    | BASIS    |
| PD4006       | CLTC    | cna | amp     | BASIS    |
| PD4967       | CLTC    | cna | homdel  | BASIS    |
| PD5930       | CLTC    | cna | gain    | BASIS    |
| PD5935       | CLTC    | cna | amp     | BASIS    |
| PD5945       | CLTC    | cna | amp     | BASIS    |
| PD5948       | CLTC    | cna | gain    | BASIS    |
| PD6406       | CLTC    | cna | hetloss | BASIS    |
| PD6731       | CLTC    | cna | hetloss | BASIS    |
| PD7067       | CLTC    | cna | gain    | BASIS    |
| PD7215       | CLTC    | cna | gain    | BASIS    |
| PD8980       | CLTC    | cna | gain    | BASIS    |
| PD9004       | CLTC    | cna | gain    | BASIS    |
| PD9702       | CLTC    | cna | gain    | BASIS    |
| TCGA-A2-A25B | CREB3L2 | cna | gain    | TCGA     |
| TCGA-AO-A0JL | CREB3L2 | cna | gain    | TCGA     |
| TCGA-BH-A0AW | CREB3L2 | cna | gain    | TCGA     |
| TCGA-D8-A27M | CREB3L2 | cna | gain    | TCGA     |
| TCGA-E2-A1L7 | CREB3L2 | cna | hetloss | TCGA     |
| TCGA-E9-A1NC | CREB3L2 | cna | gain    | TCGA     |
| TCGA-LL-A5YP | CREB3L2 | cna | gain    | TCGA     |
| MB-0346      | CREB3L2 | cna | gain    | METABRIC |
| MB-2827      | CREB3L2 | cna | amp     | METABRIC |
| MB-5107      | CREB3L2 | cna | gain    | METABRIC |
| MB-7038      | CREB3L2 | cna | gain    | METABRIC |
| MB-7048      | CREB3L2 | cna | gain    | METABRIC |
| PD10014      | CREB3L2 | cna | gain    | BASIS    |
| PD11327      | CREB3L2 | cna | gain    | BASIS    |
| PD13296      | CREB3L2 | cna | hetloss | BASIS    |
| PD13297      | CREB3L2 | cna | gain    | BASIS    |
| PD13299      | CREB3L2 | cna | gain    | BASIS    |
| PD22355      | CREB3L2 | cna | hetloss | BASIS    |
| PD23562      | CREB3L2 | cna | gain    | BASIS    |
| PD23574      | CREB3L2 | cna | gain    | BASIS    |
| PD23578      | CREB3L2 | cna | hetloss | BASIS    |
| PD24186      | CREB3L2 | cna | amp     | BASIS    |
| PD24202      | CREB3L2 | cna | gain    | BASIS    |
| PD24206      | CREB3L2 | cna | hetloss | BASIS    |
| PD24337      | CREB3L2 | cna | gain    | BASIS    |
| PD3890       | CREB3L2 | cna | hetloss | BASIS    |
| PD3905       | CREB3L2 | cna | gain    | BASIS    |
| PD4006       | CREB3L2 | cna | gain    | BASIS    |

|              |         |     |         |          |
|--------------|---------|-----|---------|----------|
| PD4107       | CREB3L2 | cna | gain    | BASIS    |
| PD4826       | CREB3L2 | cna | gain    | BASIS    |
| PD5930       | CREB3L2 | cna | gain    | BASIS    |
| PD5935       | CREB3L2 | cna | gain    | BASIS    |
| PD5945       | CREB3L2 | cna | amp     | BASIS    |
| PD5948       | CREB3L2 | cna | gain    | BASIS    |
| PD6406       | CREB3L2 | cna | gain    | BASIS    |
| PD6731       | CREB3L2 | cna | hetloss | BASIS    |
| PD7067       | CREB3L2 | cna | gain    | BASIS    |
| PD7215       | CREB3L2 | cna | gain    | BASIS    |
| PD8621       | CREB3L2 | cna | gain    | BASIS    |
| PD9004       | CREB3L2 | cna | gain    | BASIS    |
| PD9585       | CREB3L2 | cna | gain    | BASIS    |
| PD9702       | CREB3L2 | cna | gain    | BASIS    |
| TCGA-A2-A25B | DDX10   | cna | hetloss | TCGA     |
| TCGA-AN-A0XU | DDX10   | cna | gain    | TCGA     |
| TCGA-AO-A0JL | DDX10   | cna | hetloss | TCGA     |
| TCGA-BH-A0C0 | DDX10   | cna | gain    | TCGA     |
| TCGA-BH-A18R | DDX10   | cna | homdel  | TCGA     |
| TCGA-D8-A27M | DDX10   | cna | hetloss | TCGA     |
| TCGA-E2-A1L7 | DDX10   | cna | hetloss | TCGA     |
| TCGA-E9-A1NC | DDX10   | cna | hetloss | TCGA     |
| TCGA-EW-A10X | DDX10   | cna | homdel  | TCGA     |
| TCGA-LL-A5YP | DDX10   | cna | hetloss | TCGA     |
| MB-0346      | DDX10   | cna | hetloss | METABRIC |
| MB-5070      | DDX10   | cna | hetloss | METABRIC |
| MB-5107      | DDX10   | cna | hetloss | METABRIC |
| MB-6271      | DDX10   | cna | hetloss | METABRIC |
| MB-7032      | DDX10   | cna | hetloss | METABRIC |
| MB-7048      | DDX10   | cna | hetloss | METABRIC |
| PD11327      | DDX10   | cna | gain    | BASIS    |
| PD11742      | DDX10   | cna | hetloss | BASIS    |
| PD13296      | DDX10   | cna | hetloss | BASIS    |
| PD13299      | DDX10   | cna | gain    | BASIS    |
| PD13771      | DDX10   | cna | hetloss | BASIS    |
| PD22355      | DDX10   | cna | hetloss | BASIS    |
| PD23574      | DDX10   | cna | gain    | BASIS    |
| PD23578      | DDX10   | cna | hetloss | BASIS    |
| PD24186      | DDX10   | cna | gain    | BASIS    |
| PD24206      | DDX10   | cna | gain    | BASIS    |
| PD24337      | DDX10   | cna | hetloss | BASIS    |
| PD3905       | DDX10   | cna | gain    | BASIS    |
| PD4005       | DDX10   | cna | homdel  | BASIS    |
| PD4006       | DDX10   | cna | hetloss | BASIS    |
| PD4107       | DDX10   | cna | hetloss | BASIS    |
| PD4826       | DDX10   | cna | hetloss | BASIS    |
| PD5935       | DDX10   | cna | gain    | BASIS    |

|                   |       |     |         |            |
|-------------------|-------|-----|---------|------------|
| PD5945            | DDX10 | cna | gain    | BASIS      |
| PD5948            | DDX10 | cna | gain    | BASIS      |
| PD6413            | DDX10 | cna | hetloss | BASIS      |
| PD6731            | DDX10 | cna | hetloss | BASIS      |
| PD7067            | DDX10 | cna | gain    | BASIS      |
| PD7215            | DDX10 | cna | gain    | BASIS      |
| PD9004            | DDX10 | cna | hetloss | BASIS      |
| PD9585            | DDX10 | cna | gain    | BASIS      |
| PD9702            | DDX10 | cna | gain    | BASIS      |
| TCGA-A2-A25B      | EGFL7 | cna | gain    | TCGA       |
| TCGA-AN-A0XU      | EGFL7 | cna | hetloss | TCGA       |
| TCGA-AO-A0JL      | EGFL7 | cna | hetloss | TCGA       |
| TCGA-BH-A0C0      | EGFL7 | cna | gain    | TCGA       |
| TCGA-BH-A18R      | EGFL7 | cna | amp     | TCGA       |
| TCGA-C8-A12L      | EGFL7 | cna | gain    | TCGA       |
| TCGA-E2-A1L7      | EGFL7 | cna | hetloss | TCGA       |
| TCGA-E9-A1NC      | EGFL7 | cna | hetloss | TCGA       |
| TCGA-LL-A5YP      | EGFL7 | cna | hetloss | TCGA       |
| MB-0346           | EGFL7 | cna | hetloss | METABRIC   |
| MB-2827           | EGFL7 | cna | amp     | METABRIC   |
| MB-5070           | EGFL7 | cna | hetloss | METABRIC   |
| MB-7038           | EGFL7 | cna | hetloss | METABRIC   |
| MB-7048           | EGFL7 | cna | hetloss | METABRIC   |
| MB-0420           | EGFL7 | cna | hetloss | METABRIC   |
| P-0009557-T01-IM5 | EGFL7 | cna | homdel  | MSK-IMPACT |
| PD10014           | EGFL7 | cna | gain    | BASIS      |
| PD11327           | EGFL7 | cna | gain    | BASIS      |
| PD11742           | EGFL7 | cna | gain    | BASIS      |
| PD13297           | EGFL7 | cna | hetloss | BASIS      |
| PD13299           | EGFL7 | cna | gain    | BASIS      |
| PD22355           | EGFL7 | cna | gain    | BASIS      |
| PD24186           | EGFL7 | cna | gain    | BASIS      |
| PD24202           | EGFL7 | cna | hetloss | BASIS      |
| PD24206           | EGFL7 | cna | gain    | BASIS      |
| PD24337           | EGFL7 | cna | hetloss | BASIS      |
| PD3890            | EGFL7 | cna | hetloss | BASIS      |
| PD3905            | EGFL7 | cna | gain    | BASIS      |
| PD4005            | EGFL7 | cna | hetloss | BASIS      |
| PD4006            | EGFL7 | cna | gain    | BASIS      |
| PD4107            | EGFL7 | cna | hetloss | BASIS      |
| PD4826            | EGFL7 | cna | gain    | BASIS      |
| PD5935            | EGFL7 | cna | hetloss | BASIS      |
| PD5945            | EGFL7 | cna | gain    | BASIS      |
| PD5948            | EGFL7 | cna | gain    | BASIS      |
| PD6406            | EGFL7 | cna | hetloss | BASIS      |
| PD6731            | EGFL7 | cna | hetloss | BASIS      |
| PD7067            | EGFL7 | cna | gain    | BASIS      |

|              |         |     |         |          |
|--------------|---------|-----|---------|----------|
| PD7215       | EGFL7   | cna | gain    | BASIS    |
| PD8621       | EGFL7   | cna | gain    | BASIS    |
| PD8980       | EGFL7   | cna | hetloss | BASIS    |
| PD9004       | EGFL7   | cna | hetloss | BASIS    |
| TCGA-A2-A25B | EGR3    | cna | hetloss | TCGA     |
| TCGA-AN-A0XU | EGR3    | cna | hetloss | TCGA     |
| TCGA-AO-A0JL | EGR3    | cna | hetloss | TCGA     |
| TCGA-BH-A0C0 | EGR3    | cna | hetloss | TCGA     |
| TCGA-BH-A1FU | EGR3    | cna | homdel  | TCGA     |
| TCGA-C8-A12L | EGR3    | cna | hetloss | TCGA     |
| TCGA-D8-A27M | EGR3    | cna | hetloss | TCGA     |
| TCGA-E2-A1L7 | EGR3    | cna | hetloss | TCGA     |
| TCGA-E9-A1NC | EGR3    | cna | hetloss | TCGA     |
| TCGA-LL-A5YP | EGR3    | cna | hetloss | TCGA     |
| MB-0346      | EGR3    | cna | hetloss | METABRIC |
| MB-2827      | EGR3    | cna | hetloss | METABRIC |
| MB-5070      | EGR3    | cna | hetloss | METABRIC |
| MB-5465      | EGR3    | cna | hetloss | METABRIC |
| MB-6060      | EGR3    | cna | hetloss | METABRIC |
| MB-6098      | EGR3    | cna | hetloss | METABRIC |
| MB-0420      | EGR3    | cna | hetloss | METABRIC |
| MTS-T0064    | EGR3    | cna | hetloss | METABRIC |
| PD10014      | EGR3    | cna | hetloss | BASIS    |
| PD11327      | EGR3    | cna | homdel  | BASIS    |
| PD13296      | EGR3    | cna | hetloss | BASIS    |
| PD13299      | EGR3    | cna | hetloss | BASIS    |
| PD13771      | EGR3    | cna | hetloss | BASIS    |
| PD14442      | EGR3    | cna | hetloss | BASIS    |
| PD22355      | EGR3    | cna | hetloss | BASIS    |
| PD23562      | EGR3    | cna | hetloss | BASIS    |
| PD23574      | EGR3    | cna | hetloss | BASIS    |
| PD23578      | EGR3    | cna | hetloss | BASIS    |
| PD24186      | EGR3    | cna | gain    | BASIS    |
| PD24202      | EGR3    | cna | hetloss | BASIS    |
| PD24337      | EGR3    | cna | hetloss | BASIS    |
| PD3905       | EGR3    | cna | gain    | BASIS    |
| PD4005       | EGR3    | cna | hetloss | BASIS    |
| PD4006       | EGR3    | cna | gain    | BASIS    |
| PD4826       | EGR3    | cna | hetloss | BASIS    |
| PD5935       | EGR3    | cna | gain    | BASIS    |
| PD5945       | EGR3    | cna | gain    | BASIS    |
| PD6406       | EGR3    | cna | hetloss | BASIS    |
| PD6413       | EGR3    | cna | hetloss | BASIS    |
| PD7067       | EGR3    | cna | hetloss | BASIS    |
| PD8980       | EGR3    | cna | hetloss | BASIS    |
| PD9004       | EGR3    | cna | homdel  | BASIS    |
| TCGA-AN-A0XU | FLYWCH1 | cna | gain    | TCGA     |

|              |         |     |         |          |
|--------------|---------|-----|---------|----------|
| TCGA-AO-A0JL | FLYWCH1 | cna | gain    | TCGA     |
| TCGA-BH-A0AW | FLYWCH1 | cna | gain    | TCGA     |
| TCGA-BH-A0C0 | FLYWCH1 | cna | gain    | TCGA     |
| TCGA-C8-A12L | FLYWCH1 | cna | gain    | TCGA     |
| TCGA-E2-A1L7 | FLYWCH1 | cna | hetloss | TCGA     |
| TCGA-E9-A1NC | FLYWCH1 | cna | hetloss | TCGA     |
| TCGA-LL-A5YP | FLYWCH1 | cna | hetloss | TCGA     |
| MB-0346      | FLYWCH1 | cna | hetloss | METABRIC |
| MB-5465      | FLYWCH1 | cna | hetloss | METABRIC |
| MB-6098      | FLYWCH1 | cna | hetloss | METABRIC |
| MB-6271      | FLYWCH1 | cna | gain    | METABRIC |
| MB-7032      | FLYWCH1 | cna | gain    | METABRIC |
| MB-7038      | FLYWCH1 | cna | hetloss | METABRIC |
| MB-0420      | FLYWCH1 | cna | hetloss | METABRIC |
| PD10014      | FLYWCH1 | cna | gain    | BASIS    |
| PD11327      | FLYWCH1 | cna | gain    | BASIS    |
| PD11742      | FLYWCH1 | cna | gain    | BASIS    |
| PD13296      | FLYWCH1 | cna | gain    | BASIS    |
| PD13297      | FLYWCH1 | cna | hetloss | BASIS    |
| PD13299      | FLYWCH1 | cna | gain    | BASIS    |
| PD22355      | FLYWCH1 | cna | hetloss | BASIS    |
| PD23578      | FLYWCH1 | cna | hetloss | BASIS    |
| PD24202      | FLYWCH1 | cna | hetloss | BASIS    |
| PD24337      | FLYWCH1 | cna | hetloss | BASIS    |
| PD3905       | FLYWCH1 | cna | gain    | BASIS    |
| PD4005       | FLYWCH1 | cna | gain    | BASIS    |
| PD4006       | FLYWCH1 | cna | gain    | BASIS    |
| PD4107       | FLYWCH1 | cna | gain    | BASIS    |
| PD4826       | FLYWCH1 | cna | gain    | BASIS    |
| PD4967       | FLYWCH1 | cna | gain    | BASIS    |
| PD5930       | FLYWCH1 | cna | gain    | BASIS    |
| PD5935       | FLYWCH1 | cna | gain    | BASIS    |
| PD5945       | FLYWCH1 | cna | gain    | BASIS    |
| PD5948       | FLYWCH1 | cna | gain    | BASIS    |
| PD6413       | FLYWCH1 | cna | gain    | BASIS    |
| PD7067       | FLYWCH1 | cna | gain    | BASIS    |
| PD7215       | FLYWCH1 | cna | amp     | BASIS    |
| PD8621       | FLYWCH1 | cna | gain    | BASIS    |
| PD9004       | FLYWCH1 | cna | gain    | BASIS    |
| PD9585       | FLYWCH1 | cna | hetloss | BASIS    |
| PD9702       | FLYWCH1 | cna | gain    | BASIS    |
| TCGA-AN-A0XU | FOXO1   | cna | hetloss | TCGA     |
| TCGA-AO-A0JL | FOXO1   | cna | hetloss | TCGA     |
| TCGA-BH-A0AW | FOXO1   | cna | hetloss | TCGA     |
| TCGA-BH-A0C0 | FOXO1   | cna | hetloss | TCGA     |
| TCGA-BH-A1FU | FOXO1   | cna | hetloss | TCGA     |
| TCGA-C8-A12L | FOXO1   | cna | hetloss | TCGA     |

|              |       |     |         |          |
|--------------|-------|-----|---------|----------|
| TCGA-D8-A27M | FOXO1 | cna | amp     | TCGA     |
| TCGA-EW-A10X | FOXO1 | cna | homdel  | TCGA     |
| TCGA-LL-A5YP | FOXO1 | cna | homdel  | TCGA     |
| MB-0346      | FOXO1 | cna | hetloss | METABRIC |
| MB-2827      | FOXO1 | cna | hetloss | METABRIC |
| MB-5107      | FOXO1 | cna | hetloss | METABRIC |
| MB-6098      | FOXO1 | cna | hetloss | METABRIC |
| MB-7032      | FOXO1 | cna | hetloss | METABRIC |
| MB-7048      | FOXO1 | cna | hetloss | METABRIC |
| MB-0420      | FOXO1 | cna | hetloss | METABRIC |
| MTS-T0064    | FOXO1 | cna | hetloss | METABRIC |
| PD10014      | FOXO1 | cna | hetloss | BASIS    |
| PD11742      | FOXO1 | cna | hetloss | BASIS    |
| PD13296      | FOXO1 | cna | hetloss | BASIS    |
| PD13297      | FOXO1 | cna | hetloss | BASIS    |
| PD13771      | FOXO1 | cna | hetloss | BASIS    |
| PD14442      | FOXO1 | cna | hetloss | BASIS    |
| PD22355      | FOXO1 | cna | hetloss | BASIS    |
| PD23574      | FOXO1 | cna | hetloss | BASIS    |
| PD24202      | FOXO1 | cna | hetloss | BASIS    |
| PD24206      | FOXO1 | cna | gain    | BASIS    |
| PD3890       | FOXO1 | cna | hetloss | BASIS    |
| PD3905       | FOXO1 | cna | gain    | BASIS    |
| PD4005       | FOXO1 | cna | homdel  | BASIS    |
| PD4006       | FOXO1 | cna | hetloss | BASIS    |
| PD4826       | FOXO1 | cna | hetloss | BASIS    |
| PD4967       | FOXO1 | cna | hetloss | BASIS    |
| PD5945       | FOXO1 | cna | amp     | BASIS    |
| PD6406       | FOXO1 | cna | hetloss | BASIS    |
| PD6731       | FOXO1 | cna | hetloss | BASIS    |
| PD7215       | FOXO1 | cna | gain    | BASIS    |
| PD8621       | FOXO1 | cna | hetloss | BASIS    |
| PD8980       | FOXO1 | cna | hetloss | BASIS    |
| PD9004       | FOXO1 | cna | hetloss | BASIS    |
| PD9585       | FOXO1 | cna | gain    | BASIS    |
| PD9702       | FOXO1 | cna | gain    | BASIS    |
| TCGA-A2-A25B | GMPS  | cna | gain    | TCGA     |
| TCGA-AN-A0XU | GMPS  | cna | gain    | TCGA     |
| TCGA-BH-A0C0 | GMPS  | cna | gain    | TCGA     |
| TCGA-BH-A18R | GMPS  | cna | gain    | TCGA     |
| TCGA-BH-A1FU | GMPS  | cna | hetloss | TCGA     |
| TCGA-C8-A12L | GMPS  | cna | gain    | TCGA     |
| TCGA-E2-A1L7 | GMPS  | cna | gain    | TCGA     |
| TCGA-E9-A1NC | GMPS  | cna | gain    | TCGA     |
| TCGA-LL-A5YP | GMPS  | cna | gain    | TCGA     |
| MB-0346      | GMPS  | cna | hetloss | METABRIC |
| MB-5070      | GMPS  | cna | amp     | METABRIC |

|              |        |     |         |          |
|--------------|--------|-----|---------|----------|
| MB-5107      | GMPS   | cna | amp     | METABRIC |
| MB-5465      | GMPS   | cna | amp     | METABRIC |
| MB-6060      | GMPS   | cna | gain    | METABRIC |
| MB-6098      | GMPS   | cna | gain    | METABRIC |
| MB-7048      | GMPS   | cna | hetloss | METABRIC |
| MB-0420      | GMPS   | cna | amp     | METABRIC |
| PD11327      | GMPS   | cna | gain    | BASIS    |
| PD13296      | GMPS   | cna | gain    | BASIS    |
| PD13299      | GMPS   | cna | gain    | BASIS    |
| PD13771      | GMPS   | cna | hetloss | BASIS    |
| PD22355      | GMPS   | cna | gain    | BASIS    |
| PD23561      | GMPS   | cna | hetloss | BASIS    |
| PD23562      | GMPS   | cna | amp     | BASIS    |
| PD23574      | GMPS   | cna | gain    | BASIS    |
| PD23578      | GMPS   | cna | gain    | BASIS    |
| PD24186      | GMPS   | cna | gain    | BASIS    |
| PD24202      | GMPS   | cna | gain    | BASIS    |
| PD24206      | GMPS   | cna | gain    | BASIS    |
| PD3905       | GMPS   | cna | gain    | BASIS    |
| PD4107       | GMPS   | cna | gain    | BASIS    |
| PD5930       | GMPS   | cna | gain    | BASIS    |
| PD5935       | GMPS   | cna | gain    | BASIS    |
| PD5945       | GMPS   | cna | amp     | BASIS    |
| PD5948       | GMPS   | cna | amp     | BASIS    |
| PD6731       | GMPS   | cna | gain    | BASIS    |
| PD7067       | GMPS   | cna | gain    | BASIS    |
| PD7215       | GMPS   | cna | gain    | BASIS    |
| PD8621       | GMPS   | cna | gain    | BASIS    |
| PD8980       | GMPS   | cna | gain    | BASIS    |
| PD9585       | GMPS   | cna | hetloss | BASIS    |
| PD9702       | GMPS   | cna | amp     | BASIS    |
| TCGA-A2-A25B | GOLPH3 | cna | amp     | TCGA     |
| TCGA-AN-A0XU | GOLPH3 | cna | gain    | TCGA     |
| TCGA-AO-A0JL | GOLPH3 | cna | gain    | TCGA     |
| TCGA-BH-A0AW | GOLPH3 | cna | gain    | TCGA     |
| TCGA-BH-A0C0 | GOLPH3 | cna | gain    | TCGA     |
| TCGA-BH-A1FU | GOLPH3 | cna | amp     | TCGA     |
| TCGA-C8-A12L | GOLPH3 | cna | gain    | TCGA     |
| TCGA-E9-A1NC | GOLPH3 | cna | hetloss | TCGA     |
| TCGA-LL-A5YP | GOLPH3 | cna | amp     | TCGA     |
| MB-0346      | GOLPH3 | cna | gain    | METABRIC |
| MB-5107      | GOLPH3 | cna | gain    | METABRIC |
| MB-6060      | GOLPH3 | cna | gain    | METABRIC |
| MB-6098      | GOLPH3 | cna | amp     | METABRIC |
| MB-7048      | GOLPH3 | cna | hetloss | METABRIC |
| MB-0420      | GOLPH3 | cna | gain    | METABRIC |
| PD10014      | GOLPH3 | cna | hetloss | BASIS    |

|              |          |     |         |          |
|--------------|----------|-----|---------|----------|
| PD11327      | GOLPH3   | cna | homdel  | BASIS    |
| PD13296      | GOLPH3   | cna | hetloss | BASIS    |
| PD13299      | GOLPH3   | cna | gain    | BASIS    |
| PD13771      | GOLPH3   | cna | hetloss | BASIS    |
| PD23562      | GOLPH3   | cna | gain    | BASIS    |
| PD23574      | GOLPH3   | cna | gain    | BASIS    |
| PD24186      | GOLPH3   | cna | gain    | BASIS    |
| PD24206      | GOLPH3   | cna | gain    | BASIS    |
| PD24337      | GOLPH3   | cna | hetloss | BASIS    |
| PD3905       | GOLPH3   | cna | gain    | BASIS    |
| PD4005       | GOLPH3   | cna | hetloss | BASIS    |
| PD4006       | GOLPH3   | cna | gain    | BASIS    |
| PD4107       | GOLPH3   | cna | gain    | BASIS    |
| PD4826       | GOLPH3   | cna | gain    | BASIS    |
| PD5930       | GOLPH3   | cna | gain    | BASIS    |
| PD5935       | GOLPH3   | cna | gain    | BASIS    |
| PD5945       | GOLPH3   | cna | amp     | BASIS    |
| PD5948       | GOLPH3   | cna | gain    | BASIS    |
| PD6406       | GOLPH3   | cna | gain    | BASIS    |
| PD6413       | GOLPH3   | cna | gain    | BASIS    |
| PD6731       | GOLPH3   | cna | gain    | BASIS    |
| PD7067       | GOLPH3   | cna | gain    | BASIS    |
| PD7215       | GOLPH3   | cna | amp     | BASIS    |
| PD8980       | GOLPH3   | cna | gain    | BASIS    |
| PD9004       | GOLPH3   | cna | gain    | BASIS    |
| PD9585       | GOLPH3   | cna | gain    | BASIS    |
| TCGA-AN-A0XU | HMGN2P46 | cna | hetloss | TCGA     |
| TCGA-AO-A0JL | HMGN2P46 | cna | hetloss | TCGA     |
| TCGA-BH-A0AW | HMGN2P46 | cna | hetloss | TCGA     |
| TCGA-BH-A0C0 | HMGN2P46 | cna | hetloss | TCGA     |
| TCGA-BH-A18R | HMGN2P46 | cna | gain    | TCGA     |
| TCGA-C8-A12L | HMGN2P46 | cna | hetloss | TCGA     |
| TCGA-D8-A27M | HMGN2P46 | cna | hetloss | TCGA     |
| TCGA-E2-A1L7 | HMGN2P46 | cna | hetloss | TCGA     |
| TCGA-E9-A1NC | HMGN2P46 | cna | hetloss | TCGA     |
| TCGA-LL-A5YP | HMGN2P46 | cna | gain    | TCGA     |
| MB-0346      | HMGN2P46 | cna | gain    | METABRIC |
| MB-2827      | HMGN2P46 | cna | hetloss | METABRIC |
| MB-5107      | HMGN2P46 | cna | gain    | METABRIC |
| MB-5465      | HMGN2P46 | cna | hetloss | METABRIC |
| MB-6060      | HMGN2P46 | cna | hetloss | METABRIC |
| MB-6098      | HMGN2P46 | cna | hetloss | METABRIC |
| MB-7048      | HMGN2P46 | cna | hetloss | METABRIC |
| MB-0420      | HMGN2P46 | cna | hetloss | METABRIC |
| PD10014      | HMGN2P46 | cna | hetloss | BASIS    |
| PD11327      | HMGN2P46 | cna | hetloss | BASIS    |
| PD11742      | HMGN2P46 | cna | hetloss | BASIS    |



|              |         |     |         |          |
|--------------|---------|-----|---------|----------|
| PD13296      | HMG2P46 | cna | homdel  | BASIS    |
| PD13297      | HMG2P46 | cna | hetloss | BASIS    |
| PD13299      | HMG2P46 | cna | hetloss | BASIS    |
| PD22355      | HMG2P46 | cna | hetloss | BASIS    |
| PD23574      | HMG2P46 | cna | hetloss | BASIS    |
| PD23578      | HMG2P46 | cna | hetloss | BASIS    |
| PD24202      | HMG2P46 | cna | hetloss | BASIS    |
| PD24337      | HMG2P46 | cna | hetloss | BASIS    |
| PD3890       | HMG2P46 | cna | hetloss | BASIS    |
| PD3905       | HMG2P46 | cna | gain    | BASIS    |
| PD4005       | HMG2P46 | cna | homdel  | BASIS    |
| PD4967       | HMG2P46 | cna | hetloss | BASIS    |
| PD5930       | HMG2P46 | cna | homdel  | BASIS    |
| PD5948       | HMG2P46 | cna | hetloss | BASIS    |
| PD6406       | HMG2P46 | cna | hetloss | BASIS    |
| PD6413       | HMG2P46 | cna | hetloss | BASIS    |
| PD7067       | HMG2P46 | cna | gain    | BASIS    |
| PD7215       | HMG2P46 | cna | gain    | BASIS    |
| PD8980       | HMG2P46 | cna | hetloss | BASIS    |
| PD9585       | HMG2P46 | cna | hetloss | BASIS    |
| PD9702       | HMG2P46 | cna | gain    | BASIS    |
| TCGA-A2-A25B | IL7R    | cna | amp     | TCGA     |
| TCGA-AN-A0XU | IL7R    | cna | gain    | TCGA     |
| TCGA-AO-A0JL | IL7R    | cna | gain    | TCGA     |
| TCGA-BH-A0AW | IL7R    | cna | gain    | TCGA     |
| TCGA-BH-A0C0 | IL7R    | cna | gain    | TCGA     |
| TCGA-BH-A1FU | IL7R    | cna | amp     | TCGA     |
| TCGA-E9-A1NC | IL7R    | cna | hetloss | TCGA     |
| TCGA-LL-A5YP | IL7R    | cna | amp     | TCGA     |
| MB-0346      | IL7R    | cna | gain    | METABRIC |
| MB-5070      | IL7R    | cna | gain    | METABRIC |
| MB-5107      | IL7R    | cna | gain    | METABRIC |
| MB-6060      | IL7R    | cna | gain    | METABRIC |
| MB-6098      | IL7R    | cna | amp     | METABRIC |
| MB-7048      | IL7R    | cna | hetloss | METABRIC |
| MB-0420      | IL7R    | cna | gain    | METABRIC |
| PD11327      | IL7R    | cna | gain    | BASIS    |
| PD13296      | IL7R    | cna | hetloss | BASIS    |
| PD13299      | IL7R    | cna | gain    | BASIS    |
| PD13771      | IL7R    | cna | hetloss | BASIS    |
| PD23562      | IL7R    | cna | gain    | BASIS    |
| PD23574      | IL7R    | cna | gain    | BASIS    |
| PD24186      | IL7R    | cna | gain    | BASIS    |
| PD24206      | IL7R    | cna | gain    | BASIS    |
| PD24337      | IL7R    | cna | hetloss | BASIS    |
| PD3890       | IL7R    | cna | gain    | BASIS    |
| PD3905       | IL7R    | cna | gain    | BASIS    |

|                   |      |     |         |            |
|-------------------|------|-----|---------|------------|
| PD4005            | IL7R | cna | hetloss | BASIS      |
| PD4006            | IL7R | cna | gain    | BASIS      |
| PD4107            | IL7R | cna | gain    | BASIS      |
| PD4826            | IL7R | cna | gain    | BASIS      |
| PD5930            | IL7R | cna | gain    | BASIS      |
| PD5935            | IL7R | cna | hetloss | BASIS      |
| PD5945            | IL7R | cna | amp     | BASIS      |
| PD5948            | IL7R | cna | gain    | BASIS      |
| PD6406            | IL7R | cna | gain    | BASIS      |
| PD6413            | IL7R | cna | gain    | BASIS      |
| PD6731            | IL7R | cna | gain    | BASIS      |
| PD7067            | IL7R | cna | gain    | BASIS      |
| PD7215            | IL7R | cna | amp     | BASIS      |
| PD8980            | IL7R | cna | gain    | BASIS      |
| PD9004            | IL7R | cna | gain    | BASIS      |
| PD9585            | IL7R | cna | gain    | BASIS      |
| TCGA-A2-A25B      | KRAS | cna | hetloss | TCGA       |
| TCGA-AN-A0XU      | KRAS | cna | gain    | TCGA       |
| TCGA-AO-A0JL      | KRAS | cna | gain    | TCGA       |
| TCGA-BH-A0C0      | KRAS | cna | hetloss | TCGA       |
| TCGA-BH-A18R      | KRAS | cna | gain    | TCGA       |
| TCGA-BH-A1FU      | KRAS | cna | hetloss | TCGA       |
| TCGA-C8-A12L      | KRAS | cna | gain    | TCGA       |
| TCGA-D8-A27M      | KRAS | cna | gain    | TCGA       |
| TCGA-E2-A1L7      | KRAS | cna | hetloss | TCGA       |
| TCGA-LL-A5YP      | KRAS | cna | hetloss | TCGA       |
| MB-0346           | KRAS | cna | gain    | METABRIC   |
| MB-2827           | KRAS | cna | hetloss | METABRIC   |
| MB-6098           | KRAS | cna | gain    | METABRIC   |
| MB-7038           | KRAS | cna | hetloss | METABRIC   |
| MB-7048           | KRAS | cna | hetloss | METABRIC   |
| MTS-T0064         | KRAS | cna | amp     | METABRIC   |
| P-0009557-T01-IM5 | KRAS | cna | homdel  | MSK-IMPACT |
| PD10014           | KRAS | cna | gain    | BASIS      |
| PD11327           | KRAS | cna | amp     | BASIS      |
| PD11742           | KRAS | cna | gain    | BASIS      |
| PD13296           | KRAS | cna | hetloss | BASIS      |
| PD13297           | KRAS | cna | hetloss | BASIS      |
| PD13299           | KRAS | cna | gain    | BASIS      |
| PD13771           | KRAS | cna | hetloss | BASIS      |
| PD23574           | KRAS | cna | gain    | BASIS      |
| PD24186           | KRAS | cna | gain    | BASIS      |
| PD3905            | KRAS | cna | gain    | BASIS      |
| PD4005            | KRAS | cna | hetloss | BASIS      |
| PD4006            | KRAS | cna | gain    | BASIS      |
| PD4107            | KRAS | cna | gain    | BASIS      |
| PD4826            | KRAS | cna | hetloss | BASIS      |

|              |      |     |         |          |
|--------------|------|-----|---------|----------|
| PD5930       | KRAS | cna | gain    | BASIS    |
| PD5935       | KRAS | cna | gain    | BASIS    |
| PD5945       | KRAS | cna | amp     | BASIS    |
| PD5948       | KRAS | cna | homdel  | BASIS    |
| PD6406       | KRAS | cna | gain    | BASIS    |
| PD6731       | KRAS | cna | hetloss | BASIS    |
| PD7215       | KRAS | cna | gain    | BASIS    |
| PD8621       | KRAS | cna | gain    | BASIS    |
| PD8980       | KRAS | cna | hetloss | BASIS    |
| PD9004       | KRAS | cna | amp     | BASIS    |
| PD9702       | KRAS | cna | amp     | BASIS    |
| TCGA-AN-A0XU | LCP1 | cna | hetloss | TCGA     |
| TCGA-AO-A0JL | LCP1 | cna | hetloss | TCGA     |
| TCGA-BH-A0AW | LCP1 | cna | hetloss | TCGA     |
| TCGA-BH-A0C0 | LCP1 | cna | hetloss | TCGA     |
| TCGA-BH-A1FU | LCP1 | cna | hetloss | TCGA     |
| TCGA-C8-A12L | LCP1 | cna | gain    | TCGA     |
| TCGA-LL-A5YP | LCP1 | cna | hetloss | TCGA     |
| MB-0346      | LCP1 | cna | hetloss | METABRIC |
| MB-2827      | LCP1 | cna | hetloss | METABRIC |
| MB-5107      | LCP1 | cna | hetloss | METABRIC |
| MB-6098      | LCP1 | cna | hetloss | METABRIC |
| MB-7032      | LCP1 | cna | hetloss | METABRIC |
| MB-7038      | LCP1 | cna | hetloss | METABRIC |
| MB-7048      | LCP1 | cna | hetloss | METABRIC |
| MB-0420      | LCP1 | cna | hetloss | METABRIC |
| MTS-T0064    | LCP1 | cna | hetloss | METABRIC |
| PD10014      | LCP1 | cna | hetloss | BASIS    |
| PD11327      | LCP1 | cna | gain    | BASIS    |
| PD11742      | LCP1 | cna | hetloss | BASIS    |
| PD13296      | LCP1 | cna | hetloss | BASIS    |
| PD13297      | LCP1 | cna | hetloss | BASIS    |
| PD13771      | LCP1 | cna | hetloss | BASIS    |
| PD14442      | LCP1 | cna | hetloss | BASIS    |
| PD22355      | LCP1 | cna | hetloss | BASIS    |
| PD23574      | LCP1 | cna | hetloss | BASIS    |
| PD24202      | LCP1 | cna | hetloss | BASIS    |
| PD24206      | LCP1 | cna | gain    | BASIS    |
| PD3890       | LCP1 | cna | hetloss | BASIS    |
| PD3905       | LCP1 | cna | gain    | BASIS    |
| PD4005       | LCP1 | cna | homdel  | BASIS    |
| PD4006       | LCP1 | cna | hetloss | BASIS    |
| PD4826       | LCP1 | cna | hetloss | BASIS    |
| PD4967       | LCP1 | cna | hetloss | BASIS    |
| PD5945       | LCP1 | cna | gain    | BASIS    |
| PD6406       | LCP1 | cna | hetloss | BASIS    |
| PD6731       | LCP1 | cna | hetloss | BASIS    |

|              |      |     |         |          |
|--------------|------|-----|---------|----------|
| PD7215       | LCP1 | cna | gain    | BASIS    |
| PD8621       | LCP1 | cna | hetloss | BASIS    |
| PD8980       | LCP1 | cna | hetloss | BASIS    |
| PD9004       | LCP1 | cna | hetloss | BASIS    |
| PD9585       | LCP1 | cna | hetloss | BASIS    |
| PD9702       | LCP1 | cna | gain    | BASIS    |
| TCGA-A2-A25B | MSI2 | cna | amp     | TCGA     |
| TCGA-AN-A0XU | MSI2 | cna | gain    | TCGA     |
| TCGA-AO-A0JL | MSI2 | cna | hetloss | TCGA     |
| TCGA-BH-A0AW | MSI2 | cna | amp     | TCGA     |
| TCGA-BH-A0C0 | MSI2 | cna | gain    | TCGA     |
| TCGA-BH-A18R | MSI2 | cna | amp     | TCGA     |
| TCGA-C8-A12L | MSI2 | cna | gain    | TCGA     |
| TCGA-D8-A27M | MSI2 | cna | hetloss | TCGA     |
| TCGA-EW-A10X | MSI2 | cna | amp     | TCGA     |
| MB-0346      | MSI2 | cna | gain    | METABRIC |
| MB-5070      | MSI2 | cna | hetloss | METABRIC |
| MB-5107      | MSI2 | cna | amp     | METABRIC |
| MB-5323      | MSI2 | cna | gain    | METABRIC |
| MB-6060      | MSI2 | cna | hetloss | METABRIC |
| MB-6098      | MSI2 | cna | hetloss | METABRIC |
| MB-6271      | MSI2 | cna | hetloss | METABRIC |
| MB-7048      | MSI2 | cna | gain    | METABRIC |
| PD11327      | MSI2 | cna | gain    | BASIS    |
| PD11742      | MSI2 | cna | gain    | BASIS    |
| PD13297      | MSI2 | cna | hetloss | BASIS    |
| PD13299      | MSI2 | cna | gain    | BASIS    |
| PD22355      | MSI2 | cna | gain    | BASIS    |
| PD23561      | MSI2 | cna | gain    | BASIS    |
| PD23562      | MSI2 | cna | gain    | BASIS    |
| PD23574      | MSI2 | cna | gain    | BASIS    |
| PD24186      | MSI2 | cna | gain    | BASIS    |
| PD24337      | MSI2 | cna | hetloss | BASIS    |
| PD3890       | MSI2 | cna | hetloss | BASIS    |
| PD3905       | MSI2 | cna | gain    | BASIS    |
| PD4006       | MSI2 | cna | amp     | BASIS    |
| PD4967       | MSI2 | cna | hetloss | BASIS    |
| PD5930       | MSI2 | cna | gain    | BASIS    |
| PD5945       | MSI2 | cna | amp     | BASIS    |
| PD5948       | MSI2 | cna | gain    | BASIS    |
| PD6406       | MSI2 | cna | hetloss | BASIS    |
| PD6731       | MSI2 | cna | hetloss | BASIS    |
| PD7067       | MSI2 | cna | gain    | BASIS    |
| PD7215       | MSI2 | cna | gain    | BASIS    |
| PD8621       | MSI2 | cna | gain    | BASIS    |
| PD8980       | MSI2 | cna | gain    | BASIS    |
| PD9004       | MSI2 | cna | gain    | BASIS    |

|              |       |     |         |          |
|--------------|-------|-----|---------|----------|
| PD9702       | MSI2  | cna | gain    | BASIS    |
| TCGA-AN-A0XU | MTCP1 | cna | hetloss | TCGA     |
| TCGA-BH-A0AW | MTCP1 | cna | gain    | TCGA     |
| TCGA-BH-A0C0 | MTCP1 | cna | gain    | TCGA     |
| TCGA-BH-A1FU | MTCP1 | cna | hetloss | TCGA     |
| TCGA-C8-A12L | MTCP1 | cna | gain    | TCGA     |
| TCGA-E2-A1L7 | MTCP1 | cna | hetloss | TCGA     |
| TCGA-E9-A1NC | MTCP1 | cna | gain    | TCGA     |
| TCGA-LL-A5YP | MTCP1 | cna | gain    | TCGA     |
| MB-0346      | MTCP1 | cna | hetloss | METABRIC |
| MB-2827      | MTCP1 | cna | hetloss | METABRIC |
| MB-5465      | MTCP1 | cna | hetloss | METABRIC |
| MB-6060      | MTCP1 | cna | gain    | METABRIC |
| MB-6098      | MTCP1 | cna | hetloss | METABRIC |
| MB-7038      | MTCP1 | cna | gain    | METABRIC |
| MTS-T0064    | MTCP1 | cna | hetloss | METABRIC |
| PD10014      | MTCP1 | cna | hetloss | BASIS    |
| PD13296      | MTCP1 | cna | gain    | BASIS    |
| PD13299      | MTCP1 | cna | amp     | BASIS    |
| PD13771      | MTCP1 | cna | hetloss | BASIS    |
| PD14442      | MTCP1 | cna | gain    | BASIS    |
| PD23562      | MTCP1 | cna | hetloss | BASIS    |
| PD23574      | MTCP1 | cna | gain    | BASIS    |
| PD23578      | MTCP1 | cna | hetloss | BASIS    |
| PD24202      | MTCP1 | cna | hetloss | BASIS    |
| PD24206      | MTCP1 | cna | gain    | BASIS    |
| PD3890       | MTCP1 | cna | hetloss | BASIS    |
| PD3905       | MTCP1 | cna | gain    | BASIS    |
| PD4005       | MTCP1 | cna | gain    | BASIS    |
| PD4006       | MTCP1 | cna | gain    | BASIS    |
| PD4107       | MTCP1 | cna | gain    | BASIS    |
| PD4826       | MTCP1 | cna | gain    | BASIS    |
| PD4967       | MTCP1 | cna | gain    | BASIS    |
| PD5930       | MTCP1 | cna | gain    | BASIS    |
| PD5935       | MTCP1 | cna | gain    | BASIS    |
| PD5945       | MTCP1 | cna | amp     | BASIS    |
| PD5948       | MTCP1 | cna | gain    | BASIS    |
| PD6406       | MTCP1 | cna | gain    | BASIS    |
| PD6413       | MTCP1 | cna | gain    | BASIS    |
| PD7215       | MTCP1 | cna | amp     | BASIS    |
| PD8621       | MTCP1 | cna | amp     | BASIS    |
| PD8980       | MTCP1 | cna | gain    | BASIS    |
| PD9004       | MTCP1 | cna | gain    | BASIS    |
| TCGA-A2-A25B | NFKB1 | cna | hetloss | TCGA     |
| TCGA-AN-A0XU | NFKB1 | cna | hetloss | TCGA     |
| TCGA-BH-A0AW | NFKB1 | cna | hetloss | TCGA     |
| TCGA-BH-A0C0 | NFKB1 | cna | hetloss | TCGA     |

|              |        |     |         |          |
|--------------|--------|-----|---------|----------|
| TCGA-BH-A1FU | NFKB1  | cna | gain    | TCGA     |
| TCGA-C8-A12L | NFKB1  | cna | hetloss | TCGA     |
| TCGA-D8-A27M | NFKB1  | cna | gain    | TCGA     |
| TCGA-E2-A1L7 | NFKB1  | cna | hetloss | TCGA     |
| TCGA-E9-A1NC | NFKB1  | cna | hetloss | TCGA     |
| TCGA-LL-A5YP | NFKB1  | cna | gain    | TCGA     |
| MB-2827      | NFKB1  | cna | hetloss | METABRIC |
| MB-5070      | NFKB1  | cna | hetloss | METABRIC |
| MB-5465      | NFKB1  | cna | hetloss | METABRIC |
| MB-7048      | NFKB1  | cna | hetloss | METABRIC |
| MB-0420      | NFKB1  | cna | hetloss | METABRIC |
| PD10014      | NFKB1  | cna | gain    | BASIS    |
| PD11742      | NFKB1  | cna | hetloss | BASIS    |
| PD13296      | NFKB1  | cna | hetloss | BASIS    |
| PD13297      | NFKB1  | cna | hetloss | BASIS    |
| PD13771      | NFKB1  | cna | gain    | BASIS    |
| PD22355      | NFKB1  | cna | hetloss | BASIS    |
| PD23562      | NFKB1  | cna | gain    | BASIS    |
| PD23574      | NFKB1  | cna | gain    | BASIS    |
| PD23578      | NFKB1  | cna | hetloss | BASIS    |
| PD24202      | NFKB1  | cna | hetloss | BASIS    |
| PD24206      | NFKB1  | cna | gain    | BASIS    |
| PD24337      | NFKB1  | cna | hetloss | BASIS    |
| PD3890       | NFKB1  | cna | gain    | BASIS    |
| PD3905       | NFKB1  | cna | gain    | BASIS    |
| PD4006       | NFKB1  | cna | hetloss | BASIS    |
| PD4107       | NFKB1  | cna | gain    | BASIS    |
| PD4826       | NFKB1  | cna | gain    | BASIS    |
| PD5930       | NFKB1  | cna | hetloss | BASIS    |
| PD5935       | NFKB1  | cna | gain    | BASIS    |
| PD5945       | NFKB1  | cna | gain    | BASIS    |
| PD5948       | NFKB1  | cna | gain    | BASIS    |
| PD6406       | NFKB1  | cna | hetloss | BASIS    |
| PD7067       | NFKB1  | cna | gain    | BASIS    |
| PD7215       | NFKB1  | cna | gain    | BASIS    |
| PD8621       | NFKB1  | cna | hetloss | BASIS    |
| PD8980       | NFKB1  | cna | hetloss | BASIS    |
| PD9585       | NFKB1  | cna | hetloss | BASIS    |
| TCGA-A2-A25B | NOTCH1 | cna | gain    | TCGA     |
| TCGA-AN-A0XU | NOTCH1 | cna | hetloss | TCGA     |
| TCGA-AO-A0JL | NOTCH1 | cna | hetloss | TCGA     |
| TCGA-BH-A0C0 | NOTCH1 | cna | gain    | TCGA     |
| TCGA-BH-A18R | NOTCH1 | cna | amp     | TCGA     |
| TCGA-C8-A12L | NOTCH1 | cna | gain    | TCGA     |
| TCGA-E2-A1L7 | NOTCH1 | cna | hetloss | TCGA     |
| TCGA-E9-A1NC | NOTCH1 | cna | hetloss | TCGA     |
| TCGA-LL-A5YP | NOTCH1 | cna | hetloss | TCGA     |

|                   |        |     |         |            |
|-------------------|--------|-----|---------|------------|
| MB-0346           | NOTCH1 | cna | hetloss | METABRIC   |
| MB-2827           | NOTCH1 | cna | amp     | METABRIC   |
| MB-5070           | NOTCH1 | cna | hetloss | METABRIC   |
| MB-7038           | NOTCH1 | cna | hetloss | METABRIC   |
| MB-7048           | NOTCH1 | cna | hetloss | METABRIC   |
| MB-0420           | NOTCH1 | cna | hetloss | METABRIC   |
| P-0009557-T01-IM5 | NOTCH1 | cna | homdel  | MSK-IMPACT |
| PD10014           | NOTCH1 | cna | gain    | BASIS      |
| PD11327           | NOTCH1 | cna | gain    | BASIS      |
| PD11742           | NOTCH1 | cna | gain    | BASIS      |
| PD13297           | NOTCH1 | cna | hetloss | BASIS      |
| PD13299           | NOTCH1 | cna | gain    | BASIS      |
| PD22355           | NOTCH1 | cna | gain    | BASIS      |
| PD24186           | NOTCH1 | cna | gain    | BASIS      |
| PD24202           | NOTCH1 | cna | hetloss | BASIS      |
| PD24206           | NOTCH1 | cna | gain    | BASIS      |
| PD24337           | NOTCH1 | cna | hetloss | BASIS      |
| PD3890            | NOTCH1 | cna | hetloss | BASIS      |
| PD3905            | NOTCH1 | cna | gain    | BASIS      |
| PD4005            | NOTCH1 | cna | hetloss | BASIS      |
| PD4006            | NOTCH1 | cna | gain    | BASIS      |
| PD4107            | NOTCH1 | cna | hetloss | BASIS      |
| PD4826            | NOTCH1 | cna | gain    | BASIS      |
| PD5935            | NOTCH1 | cna | hetloss | BASIS      |
| PD5945            | NOTCH1 | cna | gain    | BASIS      |
| PD5948            | NOTCH1 | cna | gain    | BASIS      |
| PD6406            | NOTCH1 | cna | hetloss | BASIS      |
| PD6731            | NOTCH1 | cna | hetloss | BASIS      |
| PD7067            | NOTCH1 | cna | gain    | BASIS      |
| PD7215            | NOTCH1 | cna | gain    | BASIS      |
| PD8621            | NOTCH1 | cna | gain    | BASIS      |
| PD8980            | NOTCH1 | cna | hetloss | BASIS      |
| PD9004            | NOTCH1 | cna | hetloss | BASIS      |
| TCGA-AN-A0XU      | PBRM1  | cna | hetloss | TCGA       |
| TCGA-BH-A0C0      | PBRM1  | cna | hetloss | TCGA       |
| TCGA-BH-A18R      | PBRM1  | cna | homdel  | TCGA       |
| TCGA-BH-A1FU      | PBRM1  | cna | hetloss | TCGA       |
| TCGA-C8-A12L      | PBRM1  | cna | hetloss | TCGA       |
| TCGA-D8-A27M      | PBRM1  | cna | hetloss | TCGA       |
| TCGA-E2-A1L7      | PBRM1  | cna | hetloss | TCGA       |
| TCGA-E9-A1NC      | PBRM1  | cna | hetloss | TCGA       |
| TCGA-LL-A5YP      | PBRM1  | cna | hetloss | TCGA       |
| MB-0346           | PBRM1  | cna | hetloss | METABRIC   |
| MB-2827           | PBRM1  | cna | hetloss | METABRIC   |
| MB-5465           | PBRM1  | cna | hetloss | METABRIC   |
| MB-6098           | PBRM1  | cna | hetloss | METABRIC   |
| MB-7038           | PBRM1  | cna | hetloss | METABRIC   |

|              |        |     |         |          |
|--------------|--------|-----|---------|----------|
| MB-7048      | PBRM1  | cna | hetloss | METABRIC |
| MB-0420      | PBRM1  | cna | hetloss | METABRIC |
| MTS-T0064    | PBRM1  | cna | hetloss | METABRIC |
| PD10014      | PBRM1  | cna | hetloss | BASIS    |
| PD11327      | PBRM1  | cna | hetloss | BASIS    |
| PD13296      | PBRM1  | cna | hetloss | BASIS    |
| PD13297      | PBRM1  | cna | hetloss | BASIS    |
| PD13299      | PBRM1  | cna | gain    | BASIS    |
| PD13771      | PBRM1  | cna | hetloss | BASIS    |
| PD14442      | PBRM1  | cna | hetloss | BASIS    |
| PD22355      | PBRM1  | cna | hetloss | BASIS    |
| PD23561      | PBRM1  | cna | hetloss | BASIS    |
| PD23578      | PBRM1  | cna | hetloss | BASIS    |
| PD24202      | PBRM1  | cna | hetloss | BASIS    |
| PD24206      | PBRM1  | cna | hetloss | BASIS    |
| PD24337      | PBRM1  | cna | hetloss | BASIS    |
| PD3890       | PBRM1  | cna | hetloss | BASIS    |
| PD3905       | PBRM1  | cna | gain    | BASIS    |
| PD4005       | PBRM1  | cna | hetloss | BASIS    |
| PD4826       | PBRM1  | cna | gain    | BASIS    |
| PD4967       | PBRM1  | cna | hetloss | BASIS    |
| PD5945       | PBRM1  | cna | gain    | BASIS    |
| PD6406       | PBRM1  | cna | hetloss | BASIS    |
| PD6413       | PBRM1  | cna | hetloss | BASIS    |
| PD6731       | PBRM1  | cna | hetloss | BASIS    |
| PD7067       | PBRM1  | cna | gain    | BASIS    |
| PD8980       | PBRM1  | cna | hetloss | BASIS    |
| PD9585       | PBRM1  | cna | hetloss | BASIS    |
| TCGA-AN-A0XU | PIK3R1 | cna | hetloss | TCGA     |
| TCGA-AO-A0JL | PIK3R1 | cna | hetloss | TCGA     |
| TCGA-BH-A0C0 | PIK3R1 | cna | hetloss | TCGA     |
| TCGA-BH-A1FU | PIK3R1 | cna | hetloss | TCGA     |
| TCGA-C8-A12L | PIK3R1 | cna | hetloss | TCGA     |
| TCGA-D8-A27M | PIK3R1 | cna | hetloss | TCGA     |
| TCGA-E2-A1L7 | PIK3R1 | cna | hetloss | TCGA     |
| TCGA-E9-A1NC | PIK3R1 | cna | hetloss | TCGA     |
| TCGA-LL-A5YP | PIK3R1 | cna | hetloss | TCGA     |
| MB-0346      | PIK3R1 | cna | gain    | METABRIC |
| MB-2827      | PIK3R1 | cna | hetloss | METABRIC |
| MB-5070      | PIK3R1 | cna | homdel  | METABRIC |
| MB-5107      | PIK3R1 | cna | hetloss | METABRIC |
| MB-5465      | PIK3R1 | cna | hetloss | METABRIC |
| MB-6098      | PIK3R1 | cna | hetloss | METABRIC |
| MB-7038      | PIK3R1 | cna | hetloss | METABRIC |
| MB-0420      | PIK3R1 | cna | hetloss | METABRIC |
| PD10014      | PIK3R1 | cna | hetloss | BASIS    |
| PD11742      | PIK3R1 | cna | hetloss | BASIS    |



|              |        |     |         |          |
|--------------|--------|-----|---------|----------|
| PD13296      | PIK3R1 | cna | hetloss | BASIS    |
| PD13297      | PIK3R1 | cna | hetloss | BASIS    |
| PD22355      | PIK3R1 | cna | hetloss | BASIS    |
| PD23562      | PIK3R1 | cna | hetloss | BASIS    |
| PD23578      | PIK3R1 | cna | hetloss | BASIS    |
| PD24202      | PIK3R1 | cna | hetloss | BASIS    |
| PD24206      | PIK3R1 | cna | gain    | BASIS    |
| PD24337      | PIK3R1 | cna | hetloss | BASIS    |
| PD3890       | PIK3R1 | cna | hetloss | BASIS    |
| PD3905       | PIK3R1 | cna | gain    | BASIS    |
| PD4005       | PIK3R1 | cna | hetloss | BASIS    |
| PD4006       | PIK3R1 | cna | homdel  | BASIS    |
| PD4107       | PIK3R1 | cna | hetloss | BASIS    |
| PD5930       | PIK3R1 | cna | gain    | BASIS    |
| PD5935       | PIK3R1 | cna | hetloss | BASIS    |
| PD5948       | PIK3R1 | cna | hetloss | BASIS    |
| PD6406       | PIK3R1 | cna | hetloss | BASIS    |
| PD6413       | PIK3R1 | cna | hetloss | BASIS    |
| PD6731       | PIK3R1 | cna | hetloss | BASIS    |
| PD7215       | PIK3R1 | cna | hetloss | BASIS    |
| PD8621       | PIK3R1 | cna | hetloss | BASIS    |
| PD8980       | PIK3R1 | cna | hetloss | BASIS    |
| PD9585       | PIK3R1 | cna | hetloss | BASIS    |
| TCGA-A2-A25B | PTPN6  | cna | hetloss | TCGA     |
| TCGA-AN-A0XU | PTPN6  | cna | gain    | TCGA     |
| TCGA-AO-A0JL | PTPN6  | cna | gain    | TCGA     |
| TCGA-BH-A0C0 | PTPN6  | cna | hetloss | TCGA     |
| TCGA-BH-A18R | PTPN6  | cna | gain    | TCGA     |
| TCGA-BH-A1FU | PTPN6  | cna | hetloss | TCGA     |
| TCGA-C8-A12L | PTPN6  | cna | gain    | TCGA     |
| TCGA-D8-A27M | PTPN6  | cna | gain    | TCGA     |
| TCGA-E9-A1NC | PTPN6  | cna | gain    | TCGA     |
| TCGA-LL-A5YP | PTPN6  | cna | gain    | TCGA     |
| MB-0346      | PTPN6  | cna | hetloss | METABRIC |
| MB-5070      | PTPN6  | cna | amp     | METABRIC |
| MB-5107      | PTPN6  | cna | hetloss | METABRIC |
| MB-6098      | PTPN6  | cna | gain    | METABRIC |
| MB-7048      | PTPN6  | cna | gain    | METABRIC |
| MTS-T0064    | PTPN6  | cna | amp     | METABRIC |
| PD10014      | PTPN6  | cna | hetloss | BASIS    |
| PD11742      | PTPN6  | cna | gain    | BASIS    |
| PD13299      | PTPN6  | cna | gain    | BASIS    |
| PD13771      | PTPN6  | cna | hetloss | BASIS    |
| PD23574      | PTPN6  | cna | gain    | BASIS    |
| PD23578      | PTPN6  | cna | gain    | BASIS    |
| PD24186      | PTPN6  | cna | gain    | BASIS    |
| PD24206      | PTPN6  | cna | hetloss | BASIS    |

|              |       |     |         |          |
|--------------|-------|-----|---------|----------|
| PD24337      | PTPN6 | cna | amp     | BASIS    |
| PD3890       | PTPN6 | cna | gain    | BASIS    |
| PD3905       | PTPN6 | cna | gain    | BASIS    |
| PD4005       | PTPN6 | cna | hetloss | BASIS    |
| PD4006       | PTPN6 | cna | amp     | BASIS    |
| PD4107       | PTPN6 | cna | gain    | BASIS    |
| PD4826       | PTPN6 | cna | hetloss | BASIS    |
| PD4967       | PTPN6 | cna | hetloss | BASIS    |
| PD5930       | PTPN6 | cna | gain    | BASIS    |
| PD5935       | PTPN6 | cna | gain    | BASIS    |
| PD5945       | PTPN6 | cna | amp     | BASIS    |
| PD6406       | PTPN6 | cna | gain    | BASIS    |
| PD6731       | PTPN6 | cna | hetloss | BASIS    |
| PD7215       | PTPN6 | cna | gain    | BASIS    |
| PD8621       | PTPN6 | cna | gain    | BASIS    |
| PD8980       | PTPN6 | cna | hetloss | BASIS    |
| PD9004       | PTPN6 | cna | gain    | BASIS    |
| PD9702       | PTPN6 | cna | gain    | BASIS    |
| TCGA-A2-A25B | SDHA  | cna | gain    | TCGA     |
| TCGA-AN-A0XU | SDHA  | cna | gain    | TCGA     |
| TCGA-AO-A0JL | SDHA  | cna | gain    | TCGA     |
| TCGA-BH-A0AW | SDHA  | cna | gain    | TCGA     |
| TCGA-BH-A1FU | SDHA  | cna | hetloss | TCGA     |
| TCGA-C8-A12L | SDHA  | cna | gain    | TCGA     |
| TCGA-E2-A1L7 | SDHA  | cna | gain    | TCGA     |
| TCGA-LL-A5YP | SDHA  | cna | gain    | TCGA     |
| MB-0346      | SDHA  | cna | gain    | METABRIC |
| MB-2827      | SDHA  | cna | hetloss | METABRIC |
| MB-5107      | SDHA  | cna | gain    | METABRIC |
| MB-6098      | SDHA  | cna | amp     | METABRIC |
| MB-7038      | SDHA  | cna | amp     | METABRIC |
| MB-0420      | SDHA  | cna | gain    | METABRIC |
| MTS-T0064    | SDHA  | cna | gain    | METABRIC |
| PD10014      | SDHA  | cna | hetloss | BASIS    |
| PD11327      | SDHA  | cna | gain    | BASIS    |
| PD13771      | SDHA  | cna | hetloss | BASIS    |
| PD22355      | SDHA  | cna | hetloss | BASIS    |
| PD23562      | SDHA  | cna | gain    | BASIS    |
| PD23574      | SDHA  | cna | gain    | BASIS    |
| PD23578      | SDHA  | cna | hetloss | BASIS    |
| PD24186      | SDHA  | cna | gain    | BASIS    |
| PD24206      | SDHA  | cna | amp     | BASIS    |
| PD24337      | SDHA  | cna | hetloss | BASIS    |
| PD3890       | SDHA  | cna | gain    | BASIS    |
| PD3905       | SDHA  | cna | gain    | BASIS    |
| PD4005       | SDHA  | cna | gain    | BASIS    |
| PD4006       | SDHA  | cna | amp     | BASIS    |

|              |       |     |         |          |
|--------------|-------|-----|---------|----------|
| PD4107       | SDHA  | cna | gain    | BASIS    |
| PD4826       | SDHA  | cna | gain    | BASIS    |
| PD5930       | SDHA  | cna | amp     | BASIS    |
| PD5935       | SDHA  | cna | gain    | BASIS    |
| PD5945       | SDHA  | cna | amp     | BASIS    |
| PD5948       | SDHA  | cna | gain    | BASIS    |
| PD6413       | SDHA  | cna | gain    | BASIS    |
| PD6731       | SDHA  | cna | gain    | BASIS    |
| PD7067       | SDHA  | cna | gain    | BASIS    |
| PD7215       | SDHA  | cna | amp     | BASIS    |
| PD8980       | SDHA  | cna | gain    | BASIS    |
| PD9004       | SDHA  | cna | gain    | BASIS    |
| PD9585       | SDHA  | cna | gain    | BASIS    |
| TCGA-A2-A25B | SRSF2 | cna | gain    | TCGA     |
| TCGA-AN-A0XU | SRSF2 | cna | gain    | TCGA     |
| TCGA-AO-A0JL | SRSF2 | cna | hetloss | TCGA     |
| TCGA-BH-A0AW | SRSF2 | cna | amp     | TCGA     |
| TCGA-BH-A0C0 | SRSF2 | cna | gain    | TCGA     |
| TCGA-BH-A18R | SRSF2 | cna | amp     | TCGA     |
| TCGA-C8-A12L | SRSF2 | cna | gain    | TCGA     |
| TCGA-D8-A27M | SRSF2 | cna | gain    | TCGA     |
| TCGA-E2-A1L7 | SRSF2 | cna | gain    | TCGA     |
| TCGA-LL-A5YP | SRSF2 | cna | amp     | TCGA     |
| MB-0346      | SRSF2 | cna | gain    | METABRIC |
| MB-5070      | SRSF2 | cna | amp     | METABRIC |
| MB-5107      | SRSF2 | cna | amp     | METABRIC |
| MB-6098      | SRSF2 | cna | gain    | METABRIC |
| MB-6271      | SRSF2 | cna | hetloss | METABRIC |
| MTS-T0064    | SRSF2 | cna | gain    | METABRIC |
| PD10014      | SRSF2 | cna | gain    | BASIS    |
| PD11327      | SRSF2 | cna | gain    | BASIS    |
| PD22355      | SRSF2 | cna | hetloss | BASIS    |
| PD23561      | SRSF2 | cna | hetloss | BASIS    |
| PD23574      | SRSF2 | cna | gain    | BASIS    |
| PD24186      | SRSF2 | cna | amp     | BASIS    |
| PD24202      | SRSF2 | cna | gain    | BASIS    |
| PD24206      | SRSF2 | cna | hetloss | BASIS    |
| PD24337      | SRSF2 | cna | gain    | BASIS    |
| PD3890       | SRSF2 | cna | gain    | BASIS    |
| PD3905       | SRSF2 | cna | gain    | BASIS    |
| PD4006       | SRSF2 | cna | gain    | BASIS    |
| PD4107       | SRSF2 | cna | gain    | BASIS    |
| PD4826       | SRSF2 | cna | amp     | BASIS    |
| PD4967       | SRSF2 | cna | homdel  | BASIS    |
| PD5930       | SRSF2 | cna | gain    | BASIS    |
| PD5935       | SRSF2 | cna | gain    | BASIS    |
| PD5945       | SRSF2 | cna | amp     | BASIS    |

|              |       |     |         |          |
|--------------|-------|-----|---------|----------|
| PD5948       | SRSF2 | cna | gain    | BASIS    |
| PD6731       | SRSF2 | cna | hetloss | BASIS    |
| PD7067       | SRSF2 | cna | gain    | BASIS    |
| PD7215       | SRSF2 | cna | gain    | BASIS    |
| PD8621       | SRSF2 | cna | gain    | BASIS    |
| PD9004       | SRSF2 | cna | gain    | BASIS    |
| PD9585       | SRSF2 | cna | gain    | BASIS    |
| PD9702       | SRSF2 | cna | gain    | BASIS    |
| TCGA-A2-A25B | TERT  | cna | gain    | TCGA     |
| TCGA-AN-A0XU | TERT  | cna | gain    | TCGA     |
| TCGA-AO-A0JL | TERT  | cna | gain    | TCGA     |
| TCGA-BH-A0AW | TERT  | cna | gain    | TCGA     |
| TCGA-BH-A1FU | TERT  | cna | hetloss | TCGA     |
| TCGA-C8-A12L | TERT  | cna | gain    | TCGA     |
| TCGA-E2-A1L7 | TERT  | cna | gain    | TCGA     |
| TCGA-LL-A5YP | TERT  | cna | gain    | TCGA     |
| MB-0346      | TERT  | cna | gain    | METABRIC |
| MB-2827      | TERT  | cna | hetloss | METABRIC |
| MB-5107      | TERT  | cna | gain    | METABRIC |
| MB-6098      | TERT  | cna | amp     | METABRIC |
| MB-7038      | TERT  | cna | amp     | METABRIC |
| MB-0420      | TERT  | cna | gain    | METABRIC |
| MTS-T0064    | TERT  | cna | gain    | METABRIC |
| PD10014      | TERT  | cna | hetloss | BASIS    |
| PD11327      | TERT  | cna | gain    | BASIS    |
| PD13771      | TERT  | cna | hetloss | BASIS    |
| PD22355      | TERT  | cna | hetloss | BASIS    |
| PD23562      | TERT  | cna | gain    | BASIS    |
| PD23574      | TERT  | cna | gain    | BASIS    |
| PD23578      | TERT  | cna | hetloss | BASIS    |
| PD24186      | TERT  | cna | gain    | BASIS    |
| PD24206      | TERT  | cna | amp     | BASIS    |
| PD24337      | TERT  | cna | hetloss | BASIS    |
| PD3890       | TERT  | cna | gain    | BASIS    |
| PD3905       | TERT  | cna | gain    | BASIS    |
| PD4005       | TERT  | cna | gain    | BASIS    |
| PD4006       | TERT  | cna | amp     | BASIS    |
| PD4107       | TERT  | cna | gain    | BASIS    |
| PD4826       | TERT  | cna | gain    | BASIS    |
| PD5930       | TERT  | cna | amp     | BASIS    |
| PD5935       | TERT  | cna | gain    | BASIS    |
| PD5945       | TERT  | cna | amp     | BASIS    |
| PD5948       | TERT  | cna | gain    | BASIS    |
| PD6413       | TERT  | cna | gain    | BASIS    |
| PD6731       | TERT  | cna | gain    | BASIS    |
| PD7067       | TERT  | cna | gain    | BASIS    |
| PD7215       | TERT  | cna | amp     | BASIS    |

|              |      |     |         |          |
|--------------|------|-----|---------|----------|
| PD8980       | TERT | cna | gain    | BASIS    |
| PD9004       | TERT | cna | gain    | BASIS    |
| PD9585       | TERT | cna | gain    | BASIS    |
| TCGA-A2-A25B | TLX1 | cna | hetloss | TCGA     |
| TCGA-AN-A0XU | TLX1 | cna | hetloss | TCGA     |
| TCGA-AO-A0JL | TLX1 | cna | hetloss | TCGA     |
| TCGA-BH-A18R | TLX1 | cna | gain    | TCGA     |
| TCGA-C8-A12L | TLX1 | cna | hetloss | TCGA     |
| TCGA-D8-A27M | TLX1 | cna | hetloss | TCGA     |
| TCGA-E2-A1L7 | TLX1 | cna | hetloss | TCGA     |
| TCGA-LL-A5YP | TLX1 | cna | gain    | TCGA     |
| MB-0346      | TLX1 | cna | gain    | METABRIC |
| MB-2827      | TLX1 | cna | hetloss | METABRIC |
| MB-5070      | TLX1 | cna | hetloss | METABRIC |
| MB-6060      | TLX1 | cna | hetloss | METABRIC |
| MB-6098      | TLX1 | cna | hetloss | METABRIC |
| MB-7038      | TLX1 | cna | hetloss | METABRIC |
| MB-7048      | TLX1 | cna | hetloss | METABRIC |
| MB-0420      | TLX1 | cna | hetloss | METABRIC |
| PD10014      | TLX1 | cna | hetloss | BASIS    |
| PD11327      | TLX1 | cna | homdel  | BASIS    |
| PD11742      | TLX1 | cna | hetloss | BASIS    |
| PD22355      | TLX1 | cna | hetloss | BASIS    |
| PD23562      | TLX1 | cna | gain    | BASIS    |
| PD23574      | TLX1 | cna | gain    | BASIS    |
| PD23578      | TLX1 | cna | hetloss | BASIS    |
| PD24202      | TLX1 | cna | hetloss | BASIS    |
| PD24206      | TLX1 | cna | hetloss | BASIS    |
| PD3890       | TLX1 | cna | hetloss | BASIS    |
| PD3905       | TLX1 | cna | gain    | BASIS    |
| PD4005       | TLX1 | cna | hetloss | BASIS    |
| PD4006       | TLX1 | cna | gain    | BASIS    |
| PD4107       | TLX1 | cna | gain    | BASIS    |
| PD5935       | TLX1 | cna | hetloss | BASIS    |
| PD5945       | TLX1 | cna | gain    | BASIS    |
| PD5948       | TLX1 | cna | gain    | BASIS    |
| PD6406       | TLX1 | cna | hetloss | BASIS    |
| PD6731       | TLX1 | cna | hetloss | BASIS    |
| PD7067       | TLX1 | cna | gain    | BASIS    |
| PD7215       | TLX1 | cna | gain    | BASIS    |
| PD8621       | TLX1 | cna | gain    | BASIS    |
| PD8980       | TLX1 | cna | hetloss | BASIS    |
| PD9004       | TLX1 | cna | gain    | BASIS    |
| PD9585       | TLX1 | cna | hetloss | BASIS    |
| PD9702       | TLX1 | cna | gain    | BASIS    |
| TCGA-AN-A0XU | TNKS | cna | hetloss | TCGA     |
| TCGA-AO-A0JL | TNKS | cna | gain    | TCGA     |

|              |       |     |         |          |
|--------------|-------|-----|---------|----------|
| TCGA-BH-A0C0 | TNKS  | cna | hetloss | TCGA     |
| TCGA-BH-A1FU | TNKS  | cna | homdel  | TCGA     |
| TCGA-C8-A12L | TNKS  | cna | homdel  | TCGA     |
| TCGA-D8-A27M | TNKS  | cna | hetloss | TCGA     |
| TCGA-E9-A1NC | TNKS  | cna | hetloss | TCGA     |
| TCGA-LL-A5YP | TNKS  | cna | hetloss | TCGA     |
| MB-0346      | TNKS  | cna | hetloss | METABRIC |
| MB-2827      | TNKS  | cna | hetloss | METABRIC |
| MB-5070      | TNKS  | cna | hetloss | METABRIC |
| MB-5107      | TNKS  | cna | hetloss | METABRIC |
| MB-5465      | TNKS  | cna | hetloss | METABRIC |
| MB-6060      | TNKS  | cna | hetloss | METABRIC |
| MB-7038      | TNKS  | cna | gain    | METABRIC |
| MB-0420      | TNKS  | cna | hetloss | METABRIC |
| MTS-T0064    | TNKS  | cna | hetloss | METABRIC |
| PD10014      | TNKS  | cna | hetloss | BASIS    |
| PD13296      | TNKS  | cna | hetloss | BASIS    |
| PD13297      | TNKS  | cna | gain    | BASIS    |
| PD13299      | TNKS  | cna | hetloss | BASIS    |
| PD13771      | TNKS  | cna | hetloss | BASIS    |
| PD14442      | TNKS  | cna | hetloss | BASIS    |
| PD22355      | TNKS  | cna | hetloss | BASIS    |
| PD23562      | TNKS  | cna | hetloss | BASIS    |
| PD23574      | TNKS  | cna | hetloss | BASIS    |
| PD23578      | TNKS  | cna | hetloss | BASIS    |
| PD24186      | TNKS  | cna | gain    | BASIS    |
| PD24202      | TNKS  | cna | hetloss | BASIS    |
| PD24337      | TNKS  | cna | hetloss | BASIS    |
| PD3905       | TNKS  | cna | gain    | BASIS    |
| PD4005       | TNKS  | cna | hetloss | BASIS    |
| PD4006       | TNKS  | cna | gain    | BASIS    |
| PD4107       | TNKS  | cna | hetloss | BASIS    |
| PD4826       | TNKS  | cna | hetloss | BASIS    |
| PD5930       | TNKS  | cna | gain    | BASIS    |
| PD5945       | TNKS  | cna | amp     | BASIS    |
| PD6406       | TNKS  | cna | hetloss | BASIS    |
| PD6413       | TNKS  | cna | gain    | BASIS    |
| PD7067       | TNKS  | cna | gain    | BASIS    |
| PD8980       | TNKS  | cna | hetloss | BASIS    |
| PD9004       | TNKS  | cna | gain    | BASIS    |
| TCGA-A2-A25B | TRAF2 | cna | gain    | TCGA     |
| TCGA-AN-A0XU | TRAF2 | cna | hetloss | TCGA     |
| TCGA-AO-A0JL | TRAF2 | cna | hetloss | TCGA     |
| TCGA-BH-A0C0 | TRAF2 | cna | gain    | TCGA     |
| TCGA-BH-A18R | TRAF2 | cna | amp     | TCGA     |
| TCGA-C8-A12L | TRAF2 | cna | gain    | TCGA     |
| TCGA-E2-A1L7 | TRAF2 | cna | hetloss | TCGA     |

|                   |       |     |         |            |
|-------------------|-------|-----|---------|------------|
| TCGA-E9-A1NC      | TRAF2 | cna | hetloss | TCGA       |
| TCGA-LL-A5YP      | TRAF2 | cna | hetloss | TCGA       |
| MB-0346           | TRAF2 | cna | hetloss | METABRIC   |
| MB-2827           | TRAF2 | cna | amp     | METABRIC   |
| MB-5070           | TRAF2 | cna | hetloss | METABRIC   |
| MB-7038           | TRAF2 | cna | hetloss | METABRIC   |
| MB-7048           | TRAF2 | cna | hetloss | METABRIC   |
| MB-0420           | TRAF2 | cna | hetloss | METABRIC   |
| P-0009557-T01-IM5 | TRAF2 | cna | homdel  | MSK-IMPACT |
| PD10014           | TRAF2 | cna | gain    | BASIS      |
| PD11327           | TRAF2 | cna | gain    | BASIS      |
| PD11742           | TRAF2 | cna | gain    | BASIS      |
| PD13297           | TRAF2 | cna | hetloss | BASIS      |
| PD13299           | TRAF2 | cna | gain    | BASIS      |
| PD22355           | TRAF2 | cna | gain    | BASIS      |
| PD24186           | TRAF2 | cna | gain    | BASIS      |
| PD24202           | TRAF2 | cna | hetloss | BASIS      |
| PD24206           | TRAF2 | cna | gain    | BASIS      |
| PD24337           | TRAF2 | cna | hetloss | BASIS      |
| PD3890            | TRAF2 | cna | hetloss | BASIS      |
| PD3905            | TRAF2 | cna | gain    | BASIS      |
| PD4005            | TRAF2 | cna | hetloss | BASIS      |
| PD4006            | TRAF2 | cna | gain    | BASIS      |
| PD4107            | TRAF2 | cna | hetloss | BASIS      |
| PD4826            | TRAF2 | cna | gain    | BASIS      |
| PD5935            | TRAF2 | cna | hetloss | BASIS      |
| PD5945            | TRAF2 | cna | gain    | BASIS      |
| PD5948            | TRAF2 | cna | gain    | BASIS      |
| PD6406            | TRAF2 | cna | hetloss | BASIS      |
| PD6731            | TRAF2 | cna | hetloss | BASIS      |
| PD7067            | TRAF2 | cna | gain    | BASIS      |
| PD7215            | TRAF2 | cna | gain    | BASIS      |
| PD8621            | TRAF2 | cna | gain    | BASIS      |
| PD8980            | TRAF2 | cna | hetloss | BASIS      |
| PD9004            | TRAF2 | cna | hetloss | BASIS      |
| TCGA-A2-A25B      | TSHZ2 | cna | gain    | TCGA       |
| TCGA-AO-A0JL      | TSHZ2 | cna | gain    | TCGA       |
| TCGA-BH-A0AW      | TSHZ2 | cna | gain    | TCGA       |
| TCGA-BH-A0C0      | TSHZ2 | cna | gain    | TCGA       |
| TCGA-BH-A18R      | TSHZ2 | cna | gain    | TCGA       |
| TCGA-C8-A12L      | TSHZ2 | cna | gain    | TCGA       |
| TCGA-D8-A27M      | TSHZ2 | cna | hetloss | TCGA       |
| TCGA-E2-A1L7      | TSHZ2 | cna | gain    | TCGA       |
| TCGA-LL-A5YP      | TSHZ2 | cna | gain    | TCGA       |
| MB-0346           | TSHZ2 | cna | gain    | METABRIC   |
| MB-5070           | TSHZ2 | cna | hetloss | METABRIC   |
| MB-5107           | TSHZ2 | cna | gain    | METABRIC   |

|              |       |     |         |          |
|--------------|-------|-----|---------|----------|
| MB-6060      | TSHZ2 | cna | gain    | METABRIC |
| MB-6098      | TSHZ2 | cna | hetloss | METABRIC |
| MB-7038      | TSHZ2 | cna | hetloss | METABRIC |
| MB-7048      | TSHZ2 | cna | hetloss | METABRIC |
| PD11742      | TSHZ2 | cna | gain    | BASIS    |
| PD13297      | TSHZ2 | cna | hetloss | BASIS    |
| PD13299      | TSHZ2 | cna | gain    | BASIS    |
| PD13771      | TSHZ2 | cna | gain    | BASIS    |
| PD22355      | TSHZ2 | cna | gain    | BASIS    |
| PD23562      | TSHZ2 | cna | gain    | BASIS    |
| PD23574      | TSHZ2 | cna | gain    | BASIS    |
| PD24186      | TSHZ2 | cna | gain    | BASIS    |
| PD24202      | TSHZ2 | cna | hetloss | BASIS    |
| PD24206      | TSHZ2 | cna | amp     | BASIS    |
| PD3905       | TSHZ2 | cna | gain    | BASIS    |
| PD4005       | TSHZ2 | cna | homdel  | BASIS    |
| PD4006       | TSHZ2 | cna | gain    | BASIS    |
| PD4826       | TSHZ2 | cna | gain    | BASIS    |
| PD5935       | TSHZ2 | cna | gain    | BASIS    |
| PD5945       | TSHZ2 | cna | amp     | BASIS    |
| PD5948       | TSHZ2 | cna | gain    | BASIS    |
| PD6406       | TSHZ2 | cna | gain    | BASIS    |
| PD6731       | TSHZ2 | cna | hetloss | BASIS    |
| PD7067       | TSHZ2 | cna | gain    | BASIS    |
| PD7215       | TSHZ2 | cna | amp     | BASIS    |
| PD8621       | TSHZ2 | cna | gain    | BASIS    |
| PD8980       | TSHZ2 | cna | gain    | BASIS    |
| PD9004       | TSHZ2 | cna | gain    | BASIS    |
| PD9585       | TSHZ2 | cna | hetloss | BASIS    |
| PD9702       | TSHZ2 | cna | gain    | BASIS    |
| TCGA-A2-A25B | BRAF  | cna | gain    | TCGA     |
| TCGA-AO-A0JL | BRAF  | cna | gain    | TCGA     |
| TCGA-BH-A0AW | BRAF  | cna | gain    | TCGA     |
| TCGA-D8-A27M | BRAF  | cna | gain    | TCGA     |
| TCGA-E2-A1L7 | BRAF  | cna | hetloss | TCGA     |
| TCGA-E9-A1NC | BRAF  | cna | gain    | TCGA     |
| TCGA-LL-A5YP | BRAF  | cna | gain    | TCGA     |
| MB-0346      | BRAF  | cna | hetloss | METABRIC |
| MB-2827      | BRAF  | cna | hetloss | METABRIC |
| MB-5070      | BRAF  | cna | hetloss | METABRIC |
| MB-6098      | BRAF  | cna | gain    | METABRIC |
| MB-7038      | BRAF  | cna | gain    | METABRIC |
| MB-7048      | BRAF  | cna | gain    | METABRIC |
| MB-0420      | BRAF  | cna | hetloss | METABRIC |
| PD10014      | BRAF  | cna | gain    | BASIS    |
| PD13296      | BRAF  | cna | hetloss | BASIS    |
| PD13297      | BRAF  | cna | gain    | BASIS    |



|              |       |     |         |          |
|--------------|-------|-----|---------|----------|
| PD13299      | BRAF  | cna | gain    | BASIS    |
| PD22355      | BRAF  | cna | hetloss | BASIS    |
| PD23562      | BRAF  | cna | gain    | BASIS    |
| PD23574      | BRAF  | cna | gain    | BASIS    |
| PD23578      | BRAF  | cna | hetloss | BASIS    |
| PD24186      | BRAF  | cna | amp     | BASIS    |
| PD24202      | BRAF  | cna | gain    | BASIS    |
| PD24337      | BRAF  | cna | gain    | BASIS    |
| PD3890       | BRAF  | cna | hetloss | BASIS    |
| PD3905       | BRAF  | cna | gain    | BASIS    |
| PD4006       | BRAF  | cna | gain    | BASIS    |
| PD4107       | BRAF  | cna | amp     | BASIS    |
| PD4826       | BRAF  | cna | gain    | BASIS    |
| PD5930       | BRAF  | cna | gain    | BASIS    |
| PD5945       | BRAF  | cna | amp     | BASIS    |
| PD5948       | BRAF  | cna | gain    | BASIS    |
| PD6406       | BRAF  | cna | gain    | BASIS    |
| PD6731       | BRAF  | cna | hetloss | BASIS    |
| PD7067       | BRAF  | cna | gain    | BASIS    |
| PD7215       | BRAF  | cna | gain    | BASIS    |
| PD8621       | BRAF  | cna | gain    | BASIS    |
| PD9004       | BRAF  | cna | gain    | BASIS    |
| PD9585       | BRAF  | cna | gain    | BASIS    |
| PD9702       | BRAF  | cna | gain    | BASIS    |
| TCGA-AN-A0XU | CASC5 | cna | hetloss | TCGA     |
| TCGA-AO-A0JL | CASC5 | cna | hetloss | TCGA     |
| TCGA-BH-A0C0 | CASC5 | cna | hetloss | TCGA     |
| TCGA-C8-A12L | CASC5 | cna | hetloss | TCGA     |
| TCGA-D8-A27M | CASC5 | cna | hetloss | TCGA     |
| TCGA-E2-A1L7 | CASC5 | cna | hetloss | TCGA     |
| TCGA-E9-A1NC | CASC5 | cna | hetloss | TCGA     |
| TCGA-LL-A5YP | CASC5 | cna | hetloss | TCGA     |
| MB-2827      | CASC5 | cna | hetloss | METABRIC |
| MB-5070      | CASC5 | cna | hetloss | METABRIC |
| MB-5107      | CASC5 | cna | gain    | METABRIC |
| MB-5465      | CASC5 | cna | hetloss | METABRIC |
| MB-6060      | CASC5 | cna | hetloss | METABRIC |
| MB-6098      | CASC5 | cna | hetloss | METABRIC |
| MB-7048      | CASC5 | cna | hetloss | METABRIC |
| MB-0420      | CASC5 | cna | hetloss | METABRIC |
| PD10014      | CASC5 | cna | hetloss | BASIS    |
| PD11327      | CASC5 | cna | homdel  | BASIS    |
| PD11742      | CASC5 | cna | hetloss | BASIS    |
| PD13297      | CASC5 | cna | hetloss | BASIS    |
| PD13299      | CASC5 | cna | hetloss | BASIS    |
| PD22355      | CASC5 | cna | hetloss | BASIS    |
| PD23574      | CASC5 | cna | hetloss | BASIS    |

|                   |         |     |         |            |
|-------------------|---------|-----|---------|------------|
| PD23578           | CASC5   | cna | hetloss | BASIS      |
| PD24202           | CASC5   | cna | hetloss | BASIS      |
| PD24206           | CASC5   | cna | gain    | BASIS      |
| PD24337           | CASC5   | cna | hetloss | BASIS      |
| PD3890            | CASC5   | cna | hetloss | BASIS      |
| PD3905            | CASC5   | cna | gain    | BASIS      |
| PD4005            | CASC5   | cna | homdel  | BASIS      |
| PD4967            | CASC5   | cna | hetloss | BASIS      |
| PD5930            | CASC5   | cna | hetloss | BASIS      |
| PD5945            | CASC5   | cna | gain    | BASIS      |
| PD5948            | CASC5   | cna | hetloss | BASIS      |
| PD6413            | CASC5   | cna | hetloss | BASIS      |
| PD7067            | CASC5   | cna | gain    | BASIS      |
| PD7215            | CASC5   | cna | gain    | BASIS      |
| PD8980            | CASC5   | cna | hetloss | BASIS      |
| PD9004            | CASC5   | cna | hetloss | BASIS      |
| PD9585            | CASC5   | cna | hetloss | BASIS      |
| PD9702            | CASC5   | cna | gain    | BASIS      |
| TCGA-A2-A25B      | DCUN1D1 | cna | amp     | TCGA       |
| TCGA-AN-A0XU      | DCUN1D1 | cna | gain    | TCGA       |
| TCGA-BH-A0AW      | DCUN1D1 | cna | gain    | TCGA       |
| TCGA-BH-A0C0      | DCUN1D1 | cna | gain    | TCGA       |
| TCGA-BH-A1FU      | DCUN1D1 | cna | hetloss | TCGA       |
| TCGA-C8-A12L      | DCUN1D1 | cna | gain    | TCGA       |
| TCGA-E2-A1L7      | DCUN1D1 | cna | gain    | TCGA       |
| TCGA-LL-A5YP      | DCUN1D1 | cna | gain    | TCGA       |
| MB-0346           | DCUN1D1 | cna | gain    | METABRIC   |
| MB-5070           | DCUN1D1 | cna | amp     | METABRIC   |
| MB-5107           | DCUN1D1 | cna | amp     | METABRIC   |
| MB-6060           | DCUN1D1 | cna | gain    | METABRIC   |
| MB-6098           | DCUN1D1 | cna | gain    | METABRIC   |
| MB-7038           | DCUN1D1 | cna | hetloss | METABRIC   |
| MB-0420           | DCUN1D1 | cna | gain    | METABRIC   |
| MTS-T0064         | DCUN1D1 | cna | amp     | METABRIC   |
| P-0002858-T01-IM3 | DCUN1D1 | cna | amp     | MSK-IMPACT |
| PD11327           | DCUN1D1 | cna | homdel  | BASIS      |
| PD13296           | DCUN1D1 | cna | gain    | BASIS      |
| PD13299           | DCUN1D1 | cna | gain    | BASIS      |
| PD13771           | DCUN1D1 | cna | hetloss | BASIS      |
| PD22355           | DCUN1D1 | cna | gain    | BASIS      |
| PD23561           | DCUN1D1 | cna | hetloss | BASIS      |
| PD23562           | DCUN1D1 | cna | gain    | BASIS      |
| PD23578           | DCUN1D1 | cna | gain    | BASIS      |
| PD24186           | DCUN1D1 | cna | amp     | BASIS      |
| PD24202           | DCUN1D1 | cna | gain    | BASIS      |
| PD24206           | DCUN1D1 | cna | gain    | BASIS      |
| PD3905            | DCUN1D1 | cna | gain    | BASIS      |

|              |         |     |         |          |
|--------------|---------|-----|---------|----------|
| PD4005       | DCUN1D1 | cna | gain    | BASIS    |
| PD4107       | DCUN1D1 | cna | gain    | BASIS    |
| PD5935       | DCUN1D1 | cna | gain    | BASIS    |
| PD5945       | DCUN1D1 | cna | amp     | BASIS    |
| PD5948       | DCUN1D1 | cna | gain    | BASIS    |
| PD6406       | DCUN1D1 | cna | gain    | BASIS    |
| PD6731       | DCUN1D1 | cna | gain    | BASIS    |
| PD7067       | DCUN1D1 | cna | gain    | BASIS    |
| PD7215       | DCUN1D1 | cna | gain    | BASIS    |
| PD8621       | DCUN1D1 | cna | gain    | BASIS    |
| PD8980       | DCUN1D1 | cna | gain    | BASIS    |
| PD9702       | DCUN1D1 | cna | gain    | BASIS    |
| TCGA-AN-A0XU | DUSP9   | cna | hetloss | TCGA     |
| TCGA-BH-A0AW | DUSP9   | cna | gain    | TCGA     |
| TCGA-BH-A1FU | DUSP9   | cna | hetloss | TCGA     |
| TCGA-C8-A12L | DUSP9   | cna | gain    | TCGA     |
| TCGA-E2-A1L7 | DUSP9   | cna | hetloss | TCGA     |
| TCGA-E9-A1NC | DUSP9   | cna | gain    | TCGA     |
| TCGA-LL-A5YP | DUSP9   | cna | gain    | TCGA     |
| MB-0346      | DUSP9   | cna | hetloss | METABRIC |
| MB-2827      | DUSP9   | cna | hetloss | METABRIC |
| MB-5465      | DUSP9   | cna | hetloss | METABRIC |
| MB-6060      | DUSP9   | cna | gain    | METABRIC |
| MB-6098      | DUSP9   | cna | hetloss | METABRIC |
| MB-7038      | DUSP9   | cna | gain    | METABRIC |
| MTS-T0064    | DUSP9   | cna | hetloss | METABRIC |
| PD10014      | DUSP9   | cna | hetloss | BASIS    |
| PD13296      | DUSP9   | cna | gain    | BASIS    |
| PD13299      | DUSP9   | cna | amp     | BASIS    |
| PD13771      | DUSP9   | cna | hetloss | BASIS    |
| PD14442      | DUSP9   | cna | gain    | BASIS    |
| PD23562      | DUSP9   | cna | hetloss | BASIS    |
| PD23574      | DUSP9   | cna | gain    | BASIS    |
| PD23578      | DUSP9   | cna | hetloss | BASIS    |
| PD24202      | DUSP9   | cna | hetloss | BASIS    |
| PD24206      | DUSP9   | cna | gain    | BASIS    |
| PD3890       | DUSP9   | cna | hetloss | BASIS    |
| PD3905       | DUSP9   | cna | gain    | BASIS    |
| PD4005       | DUSP9   | cna | gain    | BASIS    |
| PD4006       | DUSP9   | cna | gain    | BASIS    |
| PD4107       | DUSP9   | cna | gain    | BASIS    |
| PD4826       | DUSP9   | cna | gain    | BASIS    |
| PD4967       | DUSP9   | cna | gain    | BASIS    |
| PD5930       | DUSP9   | cna | gain    | BASIS    |
| PD5935       | DUSP9   | cna | gain    | BASIS    |
| PD5945       | DUSP9   | cna | amp     | BASIS    |
| PD5948       | DUSP9   | cna | gain    | BASIS    |

|              |       |     |         |          |
|--------------|-------|-----|---------|----------|
| PD6406       | DUSP9 | cna | gain    | BASIS    |
| PD6413       | DUSP9 | cna | gain    | BASIS    |
| PD7215       | DUSP9 | cna | amp     | BASIS    |
| PD8621       | DUSP9 | cna | amp     | BASIS    |
| PD8980       | DUSP9 | cna | gain    | BASIS    |
| PD9004       | DUSP9 | cna | gain    | BASIS    |
| TCGA-A2-A25B | ECT2L | cna | hetloss | TCGA     |
| TCGA-AN-A0XU | ECT2L | cna | amp     | TCGA     |
| TCGA-AO-A0JL | ECT2L | cna | hetloss | TCGA     |
| TCGA-BH-A0AW | ECT2L | cna | amp     | TCGA     |
| TCGA-BH-A0C0 | ECT2L | cna | gain    | TCGA     |
| TCGA-BH-A18R | ECT2L | cna | gain    | TCGA     |
| TCGA-C8-A12L | ECT2L | cna | gain    | TCGA     |
| TCGA-D8-A27M | ECT2L | cna | hetloss | TCGA     |
| MB-5070      | ECT2L | cna | amp     | METABRIC |
| MB-6098      | ECT2L | cna | hetloss | METABRIC |
| MB-7032      | ECT2L | cna | hetloss | METABRIC |
| MB-7038      | ECT2L | cna | amp     | METABRIC |
| MB-7048      | ECT2L | cna | hetloss | METABRIC |
| MB-0420      | ECT2L | cna | hetloss | METABRIC |
| PD10014      | ECT2L | cna | gain    | BASIS    |
| PD11327      | ECT2L | cna | gain    | BASIS    |
| PD13296      | ECT2L | cna | hetloss | BASIS    |
| PD13299      | ECT2L | cna | gain    | BASIS    |
| PD13771      | ECT2L | cna | hetloss | BASIS    |
| PD22355      | ECT2L | cna | gain    | BASIS    |
| PD23562      | ECT2L | cna | gain    | BASIS    |
| PD23574      | ECT2L | cna | gain    | BASIS    |
| PD24186      | ECT2L | cna | gain    | BASIS    |
| PD24202      | ECT2L | cna | gain    | BASIS    |
| PD24206      | ECT2L | cna | hetloss | BASIS    |
| PD3890       | ECT2L | cna | hetloss | BASIS    |
| PD3905       | ECT2L | cna | gain    | BASIS    |
| PD4006       | ECT2L | cna | hetloss | BASIS    |
| PD4107       | ECT2L | cna | gain    | BASIS    |
| PD4826       | ECT2L | cna | gain    | BASIS    |
| PD4967       | ECT2L | cna | homdel  | BASIS    |
| PD5935       | ECT2L | cna | gain    | BASIS    |
| PD5945       | ECT2L | cna | amp     | BASIS    |
| PD6406       | ECT2L | cna | hetloss | BASIS    |
| PD6731       | ECT2L | cna | hetloss | BASIS    |
| PD7067       | ECT2L | cna | amp     | BASIS    |
| PD7215       | ECT2L | cna | gain    | BASIS    |
| PD8980       | ECT2L | cna | gain    | BASIS    |
| PD9004       | ECT2L | cna | homdel  | BASIS    |
| PD9585       | ECT2L | cna | hetloss | BASIS    |
| PD9702       | ECT2L | cna | gain    | BASIS    |

|              |        |     |         |          |
|--------------|--------|-----|---------|----------|
| TCGA-A2-A25B | ESR1   | cna | hetloss | TCGA     |
| TCGA-AN-A0XU | ESR1   | cna | gain    | TCGA     |
| TCGA-AO-A0JL | ESR1   | cna | hetloss | TCGA     |
| TCGA-BH-A0AW | ESR1   | cna | amp     | TCGA     |
| TCGA-BH-A0C0 | ESR1   | cna | amp     | TCGA     |
| TCGA-BH-A18R | ESR1   | cna | amp     | TCGA     |
| TCGA-C8-A12L | ESR1   | cna | gain    | TCGA     |
| TCGA-D8-A27M | ESR1   | cna | hetloss | TCGA     |
| MB-2827      | ESR1   | cna | hetloss | METABRIC |
| MB-5070      | ESR1   | cna | gain    | METABRIC |
| MB-5107      | ESR1   | cna | hetloss | METABRIC |
| MB-6098      | ESR1   | cna | hetloss | METABRIC |
| MB-7032      | ESR1   | cna | hetloss | METABRIC |
| MB-7038      | ESR1   | cna | amp     | METABRIC |
| MB-7048      | ESR1   | cna | hetloss | METABRIC |
| MB-0420      | ESR1   | cna | hetloss | METABRIC |
| PD11327      | ESR1   | cna | gain    | BASIS    |
| PD13296      | ESR1   | cna | hetloss | BASIS    |
| PD13297      | ESR1   | cna | hetloss | BASIS    |
| PD13299      | ESR1   | cna | gain    | BASIS    |
| PD23562      | ESR1   | cna | gain    | BASIS    |
| PD23574      | ESR1   | cna | gain    | BASIS    |
| PD24186      | ESR1   | cna | gain    | BASIS    |
| PD24202      | ESR1   | cna | gain    | BASIS    |
| PD3890       | ESR1   | cna | hetloss | BASIS    |
| PD3905       | ESR1   | cna | gain    | BASIS    |
| PD4005       | ESR1   | cna | hetloss | BASIS    |
| PD4006       | ESR1   | cna | gain    | BASIS    |
| PD4826       | ESR1   | cna | gain    | BASIS    |
| PD4967       | ESR1   | cna | hetloss | BASIS    |
| PD5935       | ESR1   | cna | gain    | BASIS    |
| PD5945       | ESR1   | cna | amp     | BASIS    |
| PD6406       | ESR1   | cna | hetloss | BASIS    |
| PD6413       | ESR1   | cna | hetloss | BASIS    |
| PD6731       | ESR1   | cna | hetloss | BASIS    |
| PD7067       | ESR1   | cna | amp     | BASIS    |
| PD7215       | ESR1   | cna | gain    | BASIS    |
| PD8980       | ESR1   | cna | gain    | BASIS    |
| PD9004       | ESR1   | cna | gain    | BASIS    |
| PD9585       | ESR1   | cna | hetloss | BASIS    |
| PD9702       | ESR1   | cna | gain    | BASIS    |
| TCGA-AN-A0XU | FBXO31 | cna | amp     | TCGA     |
| TCGA-AO-A0JL | FBXO31 | cna | gain    | TCGA     |
| TCGA-BH-A0AW | FBXO31 | cna | hetloss | TCGA     |
| TCGA-BH-A0C0 | FBXO31 | cna | hetloss | TCGA     |
| TCGA-C8-A12L | FBXO31 | cna | hetloss | TCGA     |
| TCGA-D8-A27M | FBXO31 | cna | gain    | TCGA     |

|              |        |     |         |          |
|--------------|--------|-----|---------|----------|
| TCGA-E2-A1L7 | FBXO31 | cna | hetloss | TCGA     |
| TCGA-E9-A1NC | FBXO31 | cna | hetloss | TCGA     |
| TCGA-LL-A5YP | FBXO31 | cna | gain    | TCGA     |
| MB-0346      | FBXO31 | cna | gain    | METABRIC |
| MB-5107      | FBXO31 | cna | hetloss | METABRIC |
| MB-5465      | FBXO31 | cna | hetloss | METABRIC |
| MB-6271      | FBXO31 | cna | hetloss | METABRIC |
| MB-7032      | FBXO31 | cna | hetloss | METABRIC |
| MB-7038      | FBXO31 | cna | amp     | METABRIC |
| MB-7048      | FBXO31 | cna | hetloss | METABRIC |
| MB-0420      | FBXO31 | cna | hetloss | METABRIC |
| PD10014      | FBXO31 | cna | hetloss | BASIS    |
| PD11327      | FBXO31 | cna | gain    | BASIS    |
| PD11742      | FBXO31 | cna | hetloss | BASIS    |
| PD13296      | FBXO31 | cna | hetloss | BASIS    |
| PD13297      | FBXO31 | cna | hetloss | BASIS    |
| PD13299      | FBXO31 | cna | gain    | BASIS    |
| PD14442      | FBXO31 | cna | hetloss | BASIS    |
| PD23562      | FBXO31 | cna | gain    | BASIS    |
| PD23574      | FBXO31 | cna | gain    | BASIS    |
| PD24202      | FBXO31 | cna | hetloss | BASIS    |
| PD3890       | FBXO31 | cna | gain    | BASIS    |
| PD3905       | FBXO31 | cna | gain    | BASIS    |
| PD4005       | FBXO31 | cna | hetloss | BASIS    |
| PD4006       | FBXO31 | cna | gain    | BASIS    |
| PD4107       | FBXO31 | cna | amp     | BASIS    |
| PD4967       | FBXO31 | cna | hetloss | BASIS    |
| PD5930       | FBXO31 | cna | gain    | BASIS    |
| PD5945       | FBXO31 | cna | gain    | BASIS    |
| PD5948       | FBXO31 | cna | gain    | BASIS    |
| PD7215       | FBXO31 | cna | gain    | BASIS    |
| PD8621       | FBXO31 | cna | gain    | BASIS    |
| PD9004       | FBXO31 | cna | gain    | BASIS    |
| PD9585       | FBXO31 | cna | hetloss | BASIS    |
| PD9702       | FBXO31 | cna | gain    | BASIS    |
| TCGA-A2-A25B | FBXW7  | cna | gain    | TCGA     |
| TCGA-AN-A0XU | FBXW7  | cna | hetloss | TCGA     |
| TCGA-BH-A0AW | FBXW7  | cna | gain    | TCGA     |
| TCGA-BH-A0C0 | FBXW7  | cna | hetloss | TCGA     |
| TCGA-BH-A18R | FBXW7  | cna | amp     | TCGA     |
| TCGA-BH-A1FU | FBXW7  | cna | gain    | TCGA     |
| TCGA-C8-A12L | FBXW7  | cna | hetloss | TCGA     |
| TCGA-D8-A27M | FBXW7  | cna | hetloss | TCGA     |
| TCGA-E2-A1L7 | FBXW7  | cna | hetloss | TCGA     |
| TCGA-E9-A1NC | FBXW7  | cna | hetloss | TCGA     |
| MB-2827      | FBXW7  | cna | hetloss | METABRIC |
| MB-5070      | FBXW7  | cna | hetloss | METABRIC |

|              |       |     |         |          |
|--------------|-------|-----|---------|----------|
| MB-5107      | FBXW7 | cna | gain    | METABRIC |
| MB-5465      | FBXW7 | cna | hetloss | METABRIC |
| MB-7038      | FBXW7 | cna | hetloss | METABRIC |
| MB-7048      | FBXW7 | cna | hetloss | METABRIC |
| MB-0420      | FBXW7 | cna | hetloss | METABRIC |
| MTS-T0064    | FBXW7 | cna | gain    | METABRIC |
| PD10014      | FBXW7 | cna | hetloss | BASIS    |
| PD11742      | FBXW7 | cna | hetloss | BASIS    |
| PD13296      | FBXW7 | cna | hetloss | BASIS    |
| PD13297      | FBXW7 | cna | hetloss | BASIS    |
| PD22355      | FBXW7 | cna | hetloss | BASIS    |
| PD23562      | FBXW7 | cna | gain    | BASIS    |
| PD23574      | FBXW7 | cna | hetloss | BASIS    |
| PD23578      | FBXW7 | cna | hetloss | BASIS    |
| PD24202      | FBXW7 | cna | hetloss | BASIS    |
| PD24206      | FBXW7 | cna | gain    | BASIS    |
| PD3905       | FBXW7 | cna | gain    | BASIS    |
| PD4005       | FBXW7 | cna | hetloss | BASIS    |
| PD4107       | FBXW7 | cna | hetloss | BASIS    |
| PD4826       | FBXW7 | cna | gain    | BASIS    |
| PD5930       | FBXW7 | cna | gain    | BASIS    |
| PD5945       | FBXW7 | cna | gain    | BASIS    |
| PD5948       | FBXW7 | cna | hetloss | BASIS    |
| PD6406       | FBXW7 | cna | hetloss | BASIS    |
| PD6731       | FBXW7 | cna | hetloss | BASIS    |
| PD7067       | FBXW7 | cna | gain    | BASIS    |
| PD7215       | FBXW7 | cna | amp     | BASIS    |
| PD8980       | FBXW7 | cna | hetloss | BASIS    |
| PD9585       | FBXW7 | cna | hetloss | BASIS    |
| TCGA-AN-A0XU | FHIT  | cna | hetloss | TCGA     |
| TCGA-BH-A0C0 | FHIT  | cna | hetloss | TCGA     |
| TCGA-BH-A18R | FHIT  | cna | homdel  | TCGA     |
| TCGA-BH-A1FU | FHIT  | cna | hetloss | TCGA     |
| TCGA-C8-A12L | FHIT  | cna | hetloss | TCGA     |
| TCGA-D8-A27M | FHIT  | cna | hetloss | TCGA     |
| TCGA-E2-A1L7 | FHIT  | cna | homdel  | TCGA     |
| TCGA-E9-A1NC | FHIT  | cna | hetloss | TCGA     |
| TCGA-LL-A5YP | FHIT  | cna | hetloss | TCGA     |
| MB-0346      | FHIT  | cna | hetloss | METABRIC |
| MB-2827      | FHIT  | cna | hetloss | METABRIC |
| MB-6098      | FHIT  | cna | hetloss | METABRIC |
| MB-7048      | FHIT  | cna | hetloss | METABRIC |
| MB-0420      | FHIT  | cna | hetloss | METABRIC |
| MTS-T0064    | FHIT  | cna | hetloss | METABRIC |
| PD10014      | FHIT  | cna | hetloss | BASIS    |
| PD11327      | FHIT  | cna | gain    | BASIS    |
| PD11742      | FHIT  | cna | hetloss | BASIS    |

|              |        |     |         |          |
|--------------|--------|-----|---------|----------|
| PD13296      | FHIT   | cna | hetloss | BASIS    |
| PD13297      | FHIT   | cna | hetloss | BASIS    |
| PD13299      | FHIT   | cna | gain    | BASIS    |
| PD13771      | FHIT   | cna | hetloss | BASIS    |
| PD22355      | FHIT   | cna | hetloss | BASIS    |
| PD23561      | FHIT   | cna | hetloss | BASIS    |
| PD23578      | FHIT   | cna | hetloss | BASIS    |
| PD24202      | FHIT   | cna | hetloss | BASIS    |
| PD24337      | FHIT   | cna | hetloss | BASIS    |
| PD3890       | FHIT   | cna | hetloss | BASIS    |
| PD3905       | FHIT   | cna | gain    | BASIS    |
| PD4005       | FHIT   | cna | homdel  | BASIS    |
| PD4107       | FHIT   | cna | gain    | BASIS    |
| PD4826       | FHIT   | cna | gain    | BASIS    |
| PD5945       | FHIT   | cna | gain    | BASIS    |
| PD5948       | FHIT   | cna | hetloss | BASIS    |
| PD6406       | FHIT   | cna | hetloss | BASIS    |
| PD6413       | FHIT   | cna | hetloss | BASIS    |
| PD6731       | FHIT   | cna | hetloss | BASIS    |
| PD7067       | FHIT   | cna | hetloss | BASIS    |
| PD8980       | FHIT   | cna | hetloss | BASIS    |
| PD9004       | FHIT   | cna | hetloss | BASIS    |
| PD9585       | FHIT   | cna | hetloss | BASIS    |
| TCGA-AO-A0JL | FKBP1A | cna | gain    | TCGA     |
| TCGA-BH-A0AW | FKBP1A | cna | gain    | TCGA     |
| TCGA-BH-A0C0 | FKBP1A | cna | hetloss | TCGA     |
| TCGA-BH-A18R | FKBP1A | cna | homdel  | TCGA     |
| TCGA-C8-A12L | FKBP1A | cna | hetloss | TCGA     |
| TCGA-D8-A27M | FKBP1A | cna | gain    | TCGA     |
| TCGA-E2-A1L7 | FKBP1A | cna | gain    | TCGA     |
| TCGA-LL-A5YP | FKBP1A | cna | hetloss | TCGA     |
| MB-0346      | FKBP1A | cna | gain    | METABRIC |
| MB-5070      | FKBP1A | cna | amp     | METABRIC |
| MB-6060      | FKBP1A | cna | gain    | METABRIC |
| MB-6098      | FKBP1A | cna | hetloss | METABRIC |
| MB-6271      | FKBP1A | cna | hetloss | METABRIC |
| MB-7032      | FKBP1A | cna | gain    | METABRIC |
| MB-7048      | FKBP1A | cna | gain    | METABRIC |
| MB-0420      | FKBP1A | cna | hetloss | METABRIC |
| MTS-T0064    | FKBP1A | cna | gain    | METABRIC |
| PD10014      | FKBP1A | cna | gain    | BASIS    |
| PD11327      | FKBP1A | cna | amp     | BASIS    |
| PD11742      | FKBP1A | cna | hetloss | BASIS    |
| PD13296      | FKBP1A | cna | hetloss | BASIS    |
| PD13299      | FKBP1A | cna | gain    | BASIS    |
| PD22355      | FKBP1A | cna | gain    | BASIS    |
| PD23574      | FKBP1A | cna | gain    | BASIS    |



|              |        |     |         |          |
|--------------|--------|-----|---------|----------|
| PD23578      | FKBP1A | cna | hetloss | BASIS    |
| PD24186      | FKBP1A | cna | amp     | BASIS    |
| PD24202      | FKBP1A | cna | hetloss | BASIS    |
| PD24337      | FKBP1A | cna | hetloss | BASIS    |
| PD3890       | FKBP1A | cna | hetloss | BASIS    |
| PD3905       | FKBP1A | cna | gain    | BASIS    |
| PD4005       | FKBP1A | cna | hetloss | BASIS    |
| PD4107       | FKBP1A | cna | gain    | BASIS    |
| PD4826       | FKBP1A | cna | hetloss | BASIS    |
| PD5935       | FKBP1A | cna | gain    | BASIS    |
| PD5945       | FKBP1A | cna | amp     | BASIS    |
| PD5948       | FKBP1A | cna | gain    | BASIS    |
| PD6406       | FKBP1A | cna | hetloss | BASIS    |
| PD7215       | FKBP1A | cna | gain    | BASIS    |
| PD8621       | FKBP1A | cna | gain    | BASIS    |
| PD8980       | FKBP1A | cna | hetloss | BASIS    |
| PD9702       | FKBP1A | cna | gain    | BASIS    |
| TCGA-A2-A25B | FOXO3  | cna | hetloss | TCGA     |
| TCGA-AN-A0XU | FOXO3  | cna | amp     | TCGA     |
| TCGA-AO-A0JL | FOXO3  | cna | hetloss | TCGA     |
| TCGA-BH-A0AW | FOXO3  | cna | gain    | TCGA     |
| TCGA-BH-A18R | FOXO3  | cna | amp     | TCGA     |
| TCGA-C8-A12L | FOXO3  | cna | gain    | TCGA     |
| TCGA-D8-A27M | FOXO3  | cna | hetloss | TCGA     |
| TCGA-E2-A1L7 | FOXO3  | cna | gain    | TCGA     |
| MB-2827      | FOXO3  | cna | amp     | METABRIC |
| MB-5107      | FOXO3  | cna | hetloss | METABRIC |
| MB-6098      | FOXO3  | cna | hetloss | METABRIC |
| MB-7032      | FOXO3  | cna | hetloss | METABRIC |
| MB-7038      | FOXO3  | cna | gain    | METABRIC |
| MB-7048      | FOXO3  | cna | hetloss | METABRIC |
| MTS-T0064    | FOXO3  | cna | amp     | METABRIC |
| PD11327      | FOXO3  | cna | gain    | BASIS    |
| PD13296      | FOXO3  | cna | gain    | BASIS    |
| PD13299      | FOXO3  | cna | gain    | BASIS    |
| PD13771      | FOXO3  | cna | hetloss | BASIS    |
| PD22355      | FOXO3  | cna | gain    | BASIS    |
| PD23562      | FOXO3  | cna | gain    | BASIS    |
| PD23574      | FOXO3  | cna | gain    | BASIS    |
| PD24186      | FOXO3  | cna | gain    | BASIS    |
| PD24206      | FOXO3  | cna | gain    | BASIS    |
| PD24337      | FOXO3  | cna | hetloss | BASIS    |
| PD3905       | FOXO3  | cna | gain    | BASIS    |
| PD4006       | FOXO3  | cna | gain    | BASIS    |
| PD4107       | FOXO3  | cna | hetloss | BASIS    |
| PD4826       | FOXO3  | cna | gain    | BASIS    |
| PD5930       | FOXO3  | cna | hetloss | BASIS    |

|              |       |     |         |          |
|--------------|-------|-----|---------|----------|
| PD5935       | FOXO3 | cna | gain    | BASIS    |
| PD5945       | FOXO3 | cna | amp     | BASIS    |
| PD6406       | FOXO3 | cna | hetloss | BASIS    |
| PD6731       | FOXO3 | cna | hetloss | BASIS    |
| PD7067       | FOXO3 | cna | gain    | BASIS    |
| PD7215       | FOXO3 | cna | gain    | BASIS    |
| PD8621       | FOXO3 | cna | gain    | BASIS    |
| PD8980       | FOXO3 | cna | gain    | BASIS    |
| PD9004       | FOXO3 | cna | gain    | BASIS    |
| PD9585       | FOXO3 | cna | hetloss | BASIS    |
| PD9702       | FOXO3 | cna | gain    | BASIS    |
| TCGA-A2-A25B | GID4  | cna | hetloss | TCGA     |
| TCGA-AN-A0XU | GID4  | cna | gain    | TCGA     |
| TCGA-AO-A0JL | GID4  | cna | gain    | TCGA     |
| TCGA-BH-A0AW | GID4  | cna | hetloss | TCGA     |
| TCGA-BH-A0C0 | GID4  | cna | hetloss | TCGA     |
| TCGA-C8-A12L | GID4  | cna | hetloss | TCGA     |
| TCGA-D8-A27M | GID4  | cna | hetloss | TCGA     |
| TCGA-E2-A1L7 | GID4  | cna | hetloss | TCGA     |
| TCGA-E9-A1NC | GID4  | cna | hetloss | TCGA     |
| TCGA-LL-A5YP | GID4  | cna | gain    | TCGA     |
| MB-0346      | GID4  | cna | gain    | METABRIC |
| MB-2827      | GID4  | cna | hetloss | METABRIC |
| MB-5070      | GID4  | cna | hetloss | METABRIC |
| MB-5107      | GID4  | cna | hetloss | METABRIC |
| MB-5465      | GID4  | cna | hetloss | METABRIC |
| MB-6098      | GID4  | cna | hetloss | METABRIC |
| MB-6271      | GID4  | cna | hetloss | METABRIC |
| MB-7038      | GID4  | cna | hetloss | METABRIC |
| MB-7048      | GID4  | cna | hetloss | METABRIC |
| MB-0420      | GID4  | cna | hetloss | METABRIC |
| PD11327      | GID4  | cna | hetloss | BASIS    |
| PD11742      | GID4  | cna | hetloss | BASIS    |
| PD13297      | GID4  | cna | hetloss | BASIS    |
| PD13771      | GID4  | cna | hetloss | BASIS    |
| PD22355      | GID4  | cna | hetloss | BASIS    |
| PD23561      | GID4  | cna | hetloss | BASIS    |
| PD24202      | GID4  | cna | hetloss | BASIS    |
| PD24206      | GID4  | cna | hetloss | BASIS    |
| PD24337      | GID4  | cna | hetloss | BASIS    |
| PD3890       | GID4  | cna | hetloss | BASIS    |
| PD3905       | GID4  | cna | gain    | BASIS    |
| PD4005       | GID4  | cna | hetloss | BASIS    |
| PD4107       | GID4  | cna | gain    | BASIS    |
| PD4826       | GID4  | cna | hetloss | BASIS    |
| PD4967       | GID4  | cna | hetloss | BASIS    |
| PD5945       | GID4  | cna | gain    | BASIS    |

|              |        |     |         |          |
|--------------|--------|-----|---------|----------|
| PD6406       | GID4   | cna | hetloss | BASIS    |
| PD6413       | GID4   | cna | hetloss | BASIS    |
| PD6731       | GID4   | cna | hetloss | BASIS    |
| PD7067       | GID4   | cna | gain    | BASIS    |
| PD9585       | GID4   | cna | hetloss | BASIS    |
| TCGA-A2-A25B | GOLGA5 | cna | hetloss | TCGA     |
| TCGA-AN-A0XU | GOLGA5 | cna | gain    | TCGA     |
| TCGA-AO-A0JL | GOLGA5 | cna | hetloss | TCGA     |
| TCGA-BH-A0AW | GOLGA5 | cna | hetloss | TCGA     |
| TCGA-BH-A1FU | GOLGA5 | cna | gain    | TCGA     |
| TCGA-C8-A12L | GOLGA5 | cna | gain    | TCGA     |
| TCGA-D8-A27M | GOLGA5 | cna | hetloss | TCGA     |
| TCGA-E2-A1L7 | GOLGA5 | cna | gain    | TCGA     |
| TCGA-E9-A1NC | GOLGA5 | cna | hetloss | TCGA     |
| TCGA-LL-A5YP | GOLGA5 | cna | hetloss | TCGA     |
| MB-0346      | GOLGA5 | cna | gain    | METABRIC |
| MB-2827      | GOLGA5 | cna | hetloss | METABRIC |
| MB-5070      | GOLGA5 | cna | hetloss | METABRIC |
| MB-5107      | GOLGA5 | cna | hetloss | METABRIC |
| MB-6098      | GOLGA5 | cna | hetloss | METABRIC |
| MTS-T0064    | GOLGA5 | cna | hetloss | METABRIC |
| PD10014      | GOLGA5 | cna | hetloss | BASIS    |
| PD11327      | GOLGA5 | cna | hetloss | BASIS    |
| PD11742      | GOLGA5 | cna | hetloss | BASIS    |
| PD13296      | GOLGA5 | cna | gain    | BASIS    |
| PD13297      | GOLGA5 | cna | hetloss | BASIS    |
| PD13771      | GOLGA5 | cna | hetloss | BASIS    |
| PD23562      | GOLGA5 | cna | gain    | BASIS    |
| PD23574      | GOLGA5 | cna | gain    | BASIS    |
| PD23578      | GOLGA5 | cna | hetloss | BASIS    |
| PD24202      | GOLGA5 | cna | hetloss | BASIS    |
| PD24206      | GOLGA5 | cna | gain    | BASIS    |
| PD24337      | GOLGA5 | cna | hetloss | BASIS    |
| PD3890       | GOLGA5 | cna | hetloss | BASIS    |
| PD3905       | GOLGA5 | cna | gain    | BASIS    |
| PD4005       | GOLGA5 | cna | hetloss | BASIS    |
| PD4006       | GOLGA5 | cna | gain    | BASIS    |
| PD4826       | GOLGA5 | cna | gain    | BASIS    |
| PD4967       | GOLGA5 | cna | hetloss | BASIS    |
| PD5945       | GOLGA5 | cna | gain    | BASIS    |
| PD5948       | GOLGA5 | cna | gain    | BASIS    |
| PD6406       | GOLGA5 | cna | hetloss | BASIS    |
| PD6413       | GOLGA5 | cna | hetloss | BASIS    |
| PD7067       | GOLGA5 | cna | gain    | BASIS    |
| PD8980       | GOLGA5 | cna | hetloss | BASIS    |
| PD9702       | GOLGA5 | cna | gain    | BASIS    |
| TCGA-A2-A25B | KLF6   | cna | gain    | TCGA     |

|              |        |     |         |          |
|--------------|--------|-----|---------|----------|
| TCGA-AN-A0XU | KLF6   | cna | amp     | TCGA     |
| TCGA-AO-A0JL | KLF6   | cna | gain    | TCGA     |
| TCGA-BH-A0AW | KLF6   | cna | gain    | TCGA     |
| TCGA-BH-A0C0 | KLF6   | cna | gain    | TCGA     |
| TCGA-C8-A12L | KLF6   | cna | gain    | TCGA     |
| MB-5070      | KLF6   | cna | gain    | METABRIC |
| MB-5465      | KLF6   | cna | amp     | METABRIC |
| MB-6098      | KLF6   | cna | amp     | METABRIC |
| MB-7038      | KLF6   | cna | hetloss | METABRIC |
| PD10014      | KLF6   | cna | amp     | BASIS    |
| PD11327      | KLF6   | cna | amp     | BASIS    |
| PD13296      | KLF6   | cna | gain    | BASIS    |
| PD13297      | KLF6   | cna | gain    | BASIS    |
| PD13299      | KLF6   | cna | gain    | BASIS    |
| PD13771      | KLF6   | cna | gain    | BASIS    |
| PD22355      | KLF6   | cna | gain    | BASIS    |
| PD23562      | KLF6   | cna | amp     | BASIS    |
| PD23574      | KLF6   | cna | gain    | BASIS    |
| PD24186      | KLF6   | cna | amp     | BASIS    |
| PD24202      | KLF6   | cna | gain    | BASIS    |
| PD24206      | KLF6   | cna | gain    | BASIS    |
| PD24337      | KLF6   | cna | gain    | BASIS    |
| PD3905       | KLF6   | cna | gain    | BASIS    |
| PD4005       | KLF6   | cna | gain    | BASIS    |
| PD4006       | KLF6   | cna | amp     | BASIS    |
| PD4107       | KLF6   | cna | gain    | BASIS    |
| PD4826       | KLF6   | cna | gain    | BASIS    |
| PD5930       | KLF6   | cna | gain    | BASIS    |
| PD5935       | KLF6   | cna | gain    | BASIS    |
| PD5945       | KLF6   | cna | amp     | BASIS    |
| PD5948       | KLF6   | cna | gain    | BASIS    |
| PD6406       | KLF6   | cna | hetloss | BASIS    |
| PD6413       | KLF6   | cna | gain    | BASIS    |
| PD6731       | KLF6   | cna | hetloss | BASIS    |
| PD7067       | KLF6   | cna | amp     | BASIS    |
| PD7215       | KLF6   | cna | gain    | BASIS    |
| PD8621       | KLF6   | cna | gain    | BASIS    |
| PD8980       | KLF6   | cna | hetloss | BASIS    |
| PD9004       | KLF6   | cna | gain    | BASIS    |
| PD9702       | KLF6   | cna | amp     | BASIS    |
| TCGA-A2-A25B | MAP3K4 | cna | hetloss | TCGA     |
| TCGA-AN-A0XU | MAP3K4 | cna | gain    | TCGA     |
| TCGA-AO-A0JL | MAP3K4 | cna | hetloss | TCGA     |
| TCGA-BH-A0AW | MAP3K4 | cna | amp     | TCGA     |
| TCGA-BH-A0C0 | MAP3K4 | cna | hetloss | TCGA     |
| TCGA-BH-A18R | MAP3K4 | cna | homdel  | TCGA     |
| TCGA-C8-A12L | MAP3K4 | cna | hetloss | TCGA     |

|              |        |     |         |          |
|--------------|--------|-----|---------|----------|
| TCGA-D8-A27M | MAP3K4 | cna | hetloss | TCGA     |
| TCGA-E9-A1NC | MAP3K4 | cna | hetloss | TCGA     |
| MB-2827      | MAP3K4 | cna | hetloss | METABRIC |
| MB-5107      | MAP3K4 | cna | hetloss | METABRIC |
| MB-6060      | MAP3K4 | cna | hetloss | METABRIC |
| MB-6098      | MAP3K4 | cna | hetloss | METABRIC |
| MB-7048      | MAP3K4 | cna | hetloss | METABRIC |
| MB-0420      | MAP3K4 | cna | hetloss | METABRIC |
| MTS-T0064    | MAP3K4 | cna | hetloss | METABRIC |
| PD10014      | MAP3K4 | cna | hetloss | BASIS    |
| PD13296      | MAP3K4 | cna | homdel  | BASIS    |
| PD13297      | MAP3K4 | cna | hetloss | BASIS    |
| PD13299      | MAP3K4 | cna | gain    | BASIS    |
| PD23562      | MAP3K4 | cna | gain    | BASIS    |
| PD23574      | MAP3K4 | cna | amp     | BASIS    |
| PD24186      | MAP3K4 | cna | gain    | BASIS    |
| PD24206      | MAP3K4 | cna | gain    | BASIS    |
| PD3890       | MAP3K4 | cna | hetloss | BASIS    |
| PD3905       | MAP3K4 | cna | gain    | BASIS    |
| PD4005       | MAP3K4 | cna | hetloss | BASIS    |
| PD4006       | MAP3K4 | cna | gain    | BASIS    |
| PD4107       | MAP3K4 | cna | gain    | BASIS    |
| PD4826       | MAP3K4 | cna | gain    | BASIS    |
| PD4967       | MAP3K4 | cna | hetloss | BASIS    |
| PD5935       | MAP3K4 | cna | gain    | BASIS    |
| PD5945       | MAP3K4 | cna | gain    | BASIS    |
| PD6406       | MAP3K4 | cna | hetloss | BASIS    |
| PD6413       | MAP3K4 | cna | hetloss | BASIS    |
| PD6731       | MAP3K4 | cna | hetloss | BASIS    |
| PD7067       | MAP3K4 | cna | amp     | BASIS    |
| PD8980       | MAP3K4 | cna | gain    | BASIS    |
| PD9004       | MAP3K4 | cna | gain    | BASIS    |
| PD9585       | MAP3K4 | cna | hetloss | BASIS    |
| PD9702       | MAP3K4 | cna | gain    | BASIS    |
| TCGA-A2-A25B | MIR142 | cna | amp     | TCGA     |
| TCGA-AN-A0XU | MIR142 | cna | gain    | TCGA     |
| TCGA-AO-A0JL | MIR142 | cna | hetloss | TCGA     |
| TCGA-BH-A0AW | MIR142 | cna | amp     | TCGA     |
| TCGA-BH-A0C0 | MIR142 | cna | gain    | TCGA     |
| TCGA-BH-A18R | MIR142 | cna | amp     | TCGA     |
| TCGA-C8-A12L | MIR142 | cna | gain    | TCGA     |
| TCGA-D8-A27M | MIR142 | cna | hetloss | TCGA     |
| TCGA-EW-A10X | MIR142 | cna | amp     | TCGA     |
| MB-0346      | MIR142 | cna | gain    | METABRIC |
| MB-2827      | MIR142 | cna | hetloss | METABRIC |
| MB-5070      | MIR142 | cna | hetloss | METABRIC |
| MB-5107      | MIR142 | cna | amp     | METABRIC |

|              |         |     |         |          |
|--------------|---------|-----|---------|----------|
| MB-5323      | MIR142  | cna | gain    | METABRIC |
| MB-6060      | MIR142  | cna | hetloss | METABRIC |
| MB-6098      | MIR142  | cna | hetloss | METABRIC |
| MB-6271      | MIR142  | cna | hetloss | METABRIC |
| MB-7048      | MIR142  | cna | hetloss | METABRIC |
| PD11327      | MIR142  | cna | gain    | BASIS    |
| PD11742      | MIR142  | cna | gain    | BASIS    |
| PD13299      | MIR142  | cna | gain    | BASIS    |
| PD22355      | MIR142  | cna | gain    | BASIS    |
| PD23562      | MIR142  | cna | gain    | BASIS    |
| PD23574      | MIR142  | cna | gain    | BASIS    |
| PD24186      | MIR142  | cna | gain    | BASIS    |
| PD24337      | MIR142  | cna | hetloss | BASIS    |
| PD3890       | MIR142  | cna | hetloss | BASIS    |
| PD3905       | MIR142  | cna | gain    | BASIS    |
| PD4006       | MIR142  | cna | amp     | BASIS    |
| PD4967       | MIR142  | cna | gain    | BASIS    |
| PD5930       | MIR142  | cna | gain    | BASIS    |
| PD5945       | MIR142  | cna | amp     | BASIS    |
| PD5948       | MIR142  | cna | gain    | BASIS    |
| PD6406       | MIR142  | cna | hetloss | BASIS    |
| PD6731       | MIR142  | cna | hetloss | BASIS    |
| PD7067       | MIR142  | cna | gain    | BASIS    |
| PD7215       | MIR142  | cna | gain    | BASIS    |
| PD8621       | MIR142  | cna | gain    | BASIS    |
| PD8980       | MIR142  | cna | gain    | BASIS    |
| PD9004       | MIR142  | cna | gain    | BASIS    |
| PD9702       | MIR142  | cna | gain    | BASIS    |
| TCGA-AN-A0XU | NCKIPSD | cna | hetloss | TCGA     |
| TCGA-BH-A0C0 | NCKIPSD | cna | hetloss | TCGA     |
| TCGA-BH-A18R | NCKIPSD | cna | gain    | TCGA     |
| TCGA-BH-A1FU | NCKIPSD | cna | hetloss | TCGA     |
| TCGA-C8-A12L | NCKIPSD | cna | hetloss | TCGA     |
| TCGA-D8-A27M | NCKIPSD | cna | hetloss | TCGA     |
| TCGA-E2-A1L7 | NCKIPSD | cna | hetloss | TCGA     |
| TCGA-E9-A1NC | NCKIPSD | cna | hetloss | TCGA     |
| TCGA-LL-A5YP | NCKIPSD | cna | hetloss | TCGA     |
| MB-0346      | NCKIPSD | cna | hetloss | METABRIC |
| MB-2827      | NCKIPSD | cna | hetloss | METABRIC |
| MB-5107      | NCKIPSD | cna | hetloss | METABRIC |
| MB-5465      | NCKIPSD | cna | hetloss | METABRIC |
| MB-7038      | NCKIPSD | cna | hetloss | METABRIC |
| MB-7048      | NCKIPSD | cna | hetloss | METABRIC |
| MB-0420      | NCKIPSD | cna | hetloss | METABRIC |
| PD10014      | NCKIPSD | cna | hetloss | BASIS    |
| PD11327      | NCKIPSD | cna | homdel  | BASIS    |
| PD11742      | NCKIPSD | cna | hetloss | BASIS    |

|              |         |     |         |          |
|--------------|---------|-----|---------|----------|
| PD13296      | NCKIPSD | cna | hetloss | BASIS    |
| PD13297      | NCKIPSD | cna | hetloss | BASIS    |
| PD13299      | NCKIPSD | cna | gain    | BASIS    |
| PD13771      | NCKIPSD | cna | hetloss | BASIS    |
| PD14442      | NCKIPSD | cna | hetloss | BASIS    |
| PD22355      | NCKIPSD | cna | hetloss | BASIS    |
| PD23561      | NCKIPSD | cna | hetloss | BASIS    |
| PD23578      | NCKIPSD | cna | hetloss | BASIS    |
| PD24202      | NCKIPSD | cna | hetloss | BASIS    |
| PD24206      | NCKIPSD | cna | hetloss | BASIS    |
| PD24337      | NCKIPSD | cna | hetloss | BASIS    |
| PD3890       | NCKIPSD | cna | hetloss | BASIS    |
| PD3905       | NCKIPSD | cna | gain    | BASIS    |
| PD4005       | NCKIPSD | cna | hetloss | BASIS    |
| PD4826       | NCKIPSD | cna | gain    | BASIS    |
| PD5945       | NCKIPSD | cna | gain    | BASIS    |
| PD6406       | NCKIPSD | cna | hetloss | BASIS    |
| PD6413       | NCKIPSD | cna | hetloss | BASIS    |
| PD6731       | NCKIPSD | cna | hetloss | BASIS    |
| PD7067       | NCKIPSD | cna | gain    | BASIS    |
| PD8980       | NCKIPSD | cna | hetloss | BASIS    |
| PD9585       | NCKIPSD | cna | hetloss | BASIS    |
| TCGA-A2-A25B | NCOA2   | cna | gain    | TCGA     |
| TCGA-AO-A0JL | NCOA2   | cna | amp     | TCGA     |
| TCGA-BH-A0AW | NCOA2   | cna | gain    | TCGA     |
| TCGA-BH-A0C0 | NCOA2   | cna | amp     | TCGA     |
| TCGA-BH-A18R | NCOA2   | cna | homdel  | TCGA     |
| TCGA-BH-A1FU | NCOA2   | cna | gain    | TCGA     |
| TCGA-D8-A27M | NCOA2   | cna | amp     | TCGA     |
| TCGA-E2-A1L7 | NCOA2   | cna | gain    | TCGA     |
| TCGA-LL-A5YP | NCOA2   | cna | amp     | TCGA     |
| MB-0346      | NCOA2   | cna | amp     | METABRIC |
| MB-2827      | NCOA2   | cna | amp     | METABRIC |
| MB-5465      | NCOA2   | cna | hetloss | METABRIC |
| MB-6060      | NCOA2   | cna | gain    | METABRIC |
| MB-6098      | NCOA2   | cna | amp     | METABRIC |
| MB-7038      | NCOA2   | cna | gain    | METABRIC |
| MB-0420      | NCOA2   | cna | gain    | METABRIC |
| PD10014      | NCOA2   | cna | amp     | BASIS    |
| PD11327      | NCOA2   | cna | amp     | BASIS    |
| PD13296      | NCOA2   | cna | homdel  | BASIS    |
| PD13299      | NCOA2   | cna | gain    | BASIS    |
| PD13771      | NCOA2   | cna | gain    | BASIS    |
| PD23562      | NCOA2   | cna | gain    | BASIS    |
| PD23574      | NCOA2   | cna | gain    | BASIS    |
| PD24186      | NCOA2   | cna | gain    | BASIS    |
| PD24206      | NCOA2   | cna | amp     | BASIS    |

|              |       |     |         |          |
|--------------|-------|-----|---------|----------|
| PD3890       | NCOA2 | cna | gain    | BASIS    |
| PD3905       | NCOA2 | cna | gain    | BASIS    |
| PD4005       | NCOA2 | cna | hetloss | BASIS    |
| PD4006       | NCOA2 | cna | gain    | BASIS    |
| PD4826       | NCOA2 | cna | amp     | BASIS    |
| PD5935       | NCOA2 | cna | gain    | BASIS    |
| PD5945       | NCOA2 | cna | gain    | BASIS    |
| PD5948       | NCOA2 | cna | gain    | BASIS    |
| PD6406       | NCOA2 | cna | gain    | BASIS    |
| PD7067       | NCOA2 | cna | amp     | BASIS    |
| PD7215       | NCOA2 | cna | amp     | BASIS    |
| PD8621       | NCOA2 | cna | gain    | BASIS    |
| PD8980       | NCOA2 | cna | gain    | BASIS    |
| PD9004       | NCOA2 | cna | gain    | BASIS    |
| PD9585       | NCOA2 | cna | hetloss | BASIS    |
| PD9702       | NCOA2 | cna | gain    | BASIS    |
| TCGA-A2-A25B | PARK2 | cna | hetloss | TCGA     |
| TCGA-AN-A0XU | PARK2 | cna | gain    | TCGA     |
| TCGA-AO-A0JL | PARK2 | cna | hetloss | TCGA     |
| TCGA-BH-A0AW | PARK2 | cna | amp     | TCGA     |
| TCGA-BH-A0C0 | PARK2 | cna | hetloss | TCGA     |
| TCGA-BH-A18R | PARK2 | cna | homdel  | TCGA     |
| TCGA-C8-A12L | PARK2 | cna | hetloss | TCGA     |
| TCGA-D8-A27M | PARK2 | cna | hetloss | TCGA     |
| TCGA-E9-A1NC | PARK2 | cna | hetloss | TCGA     |
| MB-2827      | PARK2 | cna | hetloss | METABRIC |
| MB-5107      | PARK2 | cna | hetloss | METABRIC |
| MB-6060      | PARK2 | cna | hetloss | METABRIC |
| MB-6098      | PARK2 | cna | hetloss | METABRIC |
| MB-7048      | PARK2 | cna | hetloss | METABRIC |
| MB-0420      | PARK2 | cna | hetloss | METABRIC |
| MTS-T0064    | PARK2 | cna | hetloss | METABRIC |
| PD10014      | PARK2 | cna | hetloss | BASIS    |
| PD13296      | PARK2 | cna | homdel  | BASIS    |
| PD13297      | PARK2 | cna | hetloss | BASIS    |
| PD13299      | PARK2 | cna | gain    | BASIS    |
| PD23562      | PARK2 | cna | gain    | BASIS    |
| PD23574      | PARK2 | cna | amp     | BASIS    |
| PD24186      | PARK2 | cna | gain    | BASIS    |
| PD24206      | PARK2 | cna | gain    | BASIS    |
| PD3890       | PARK2 | cna | hetloss | BASIS    |
| PD3905       | PARK2 | cna | gain    | BASIS    |
| PD4005       | PARK2 | cna | hetloss | BASIS    |
| PD4006       | PARK2 | cna | gain    | BASIS    |
| PD4107       | PARK2 | cna | gain    | BASIS    |
| PD4826       | PARK2 | cna | gain    | BASIS    |
| PD4967       | PARK2 | cna | hetloss | BASIS    |



|              |       |     |         |          |
|--------------|-------|-----|---------|----------|
| PD5935       | PARK2 | cna | gain    | BASIS    |
| PD5945       | PARK2 | cna | gain    | BASIS    |
| PD6406       | PARK2 | cna | hetloss | BASIS    |
| PD6413       | PARK2 | cna | hetloss | BASIS    |
| PD6731       | PARK2 | cna | hetloss | BASIS    |
| PD7067       | PARK2 | cna | amp     | BASIS    |
| PD8980       | PARK2 | cna | gain    | BASIS    |
| PD9004       | PARK2 | cna | gain    | BASIS    |
| PD9585       | PARK2 | cna | hetloss | BASIS    |
| PD9702       | PARK2 | cna | gain    | BASIS    |
| TCGA-AN-A0XU | PARP3 | cna | hetloss | TCGA     |
| TCGA-BH-A0C0 | PARP3 | cna | hetloss | TCGA     |
| TCGA-BH-A18R | PARP3 | cna | homdel  | TCGA     |
| TCGA-BH-A1FU | PARP3 | cna | hetloss | TCGA     |
| TCGA-C8-A12L | PARP3 | cna | hetloss | TCGA     |
| TCGA-D8-A27M | PARP3 | cna | hetloss | TCGA     |
| TCGA-E2-A1L7 | PARP3 | cna | hetloss | TCGA     |
| TCGA-E9-A1NC | PARP3 | cna | hetloss | TCGA     |
| TCGA-LL-A5YP | PARP3 | cna | hetloss | TCGA     |
| MB-0346      | PARP3 | cna | hetloss | METABRIC |
| MB-2827      | PARP3 | cna | hetloss | METABRIC |
| MB-5465      | PARP3 | cna | hetloss | METABRIC |
| MB-6098      | PARP3 | cna | hetloss | METABRIC |
| MB-7038      | PARP3 | cna | hetloss | METABRIC |
| MB-7048      | PARP3 | cna | hetloss | METABRIC |
| MB-0420      | PARP3 | cna | hetloss | METABRIC |
| PD10014      | PARP3 | cna | hetloss | BASIS    |
| PD11327      | PARP3 | cna | hetloss | BASIS    |
| PD13296      | PARP3 | cna | hetloss | BASIS    |
| PD13297      | PARP3 | cna | hetloss | BASIS    |
| PD13299      | PARP3 | cna | gain    | BASIS    |
| PD13771      | PARP3 | cna | hetloss | BASIS    |
| PD14442      | PARP3 | cna | hetloss | BASIS    |
| PD22355      | PARP3 | cna | hetloss | BASIS    |
| PD23561      | PARP3 | cna | hetloss | BASIS    |
| PD23578      | PARP3 | cna | hetloss | BASIS    |
| PD24202      | PARP3 | cna | hetloss | BASIS    |
| PD24206      | PARP3 | cna | hetloss | BASIS    |
| PD24337      | PARP3 | cna | hetloss | BASIS    |
| PD3890       | PARP3 | cna | hetloss | BASIS    |
| PD3905       | PARP3 | cna | gain    | BASIS    |
| PD4005       | PARP3 | cna | hetloss | BASIS    |
| PD4826       | PARP3 | cna | gain    | BASIS    |
| PD4967       | PARP3 | cna | hetloss | BASIS    |
| PD5945       | PARP3 | cna | gain    | BASIS    |
| PD6406       | PARP3 | cna | hetloss | BASIS    |
| PD6413       | PARP3 | cna | hetloss | BASIS    |

|                   |        |     |         |            |
|-------------------|--------|-----|---------|------------|
| PD6731            | PARP3  | cna | hetloss | BASIS      |
| PD7067            | PARP3  | cna | gain    | BASIS      |
| PD8980            | PARP3  | cna | hetloss | BASIS      |
| PD9585            | PARP3  | cna | hetloss | BASIS      |
| TCGA-A2-A25B      | PIK3CA | cna | gain    | TCGA       |
| TCGA-AN-A0XU      | PIK3CA | cna | gain    | TCGA       |
| TCGA-BH-A0AW      | PIK3CA | cna | gain    | TCGA       |
| TCGA-BH-A0C0      | PIK3CA | cna | gain    | TCGA       |
| TCGA-BH-A1FU      | PIK3CA | cna | hetloss | TCGA       |
| TCGA-C8-A12L      | PIK3CA | cna | amp     | TCGA       |
| TCGA-E2-A1L7      | PIK3CA | cna | gain    | TCGA       |
| TCGA-LL-A5YP      | PIK3CA | cna | gain    | TCGA       |
| MB-0346           | PIK3CA | cna | gain    | METABRIC   |
| MB-5070           | PIK3CA | cna | amp     | METABRIC   |
| MB-5107           | PIK3CA | cna | amp     | METABRIC   |
| MB-6060           | PIK3CA | cna | gain    | METABRIC   |
| MB-7038           | PIK3CA | cna | hetloss | METABRIC   |
| MB-0420           | PIK3CA | cna | gain    | METABRIC   |
| MTS-T0064         | PIK3CA | cna | amp     | METABRIC   |
| P-0002858-T01-IM3 | PIK3CA | cna | amp     | MSK-IMPACT |
| PD11327           | PIK3CA | cna | amp     | BASIS      |
| PD13296           | PIK3CA | cna | gain    | BASIS      |
| PD13299           | PIK3CA | cna | gain    | BASIS      |
| PD13771           | PIK3CA | cna | hetloss | BASIS      |
| PD22355           | PIK3CA | cna | gain    | BASIS      |
| PD23561           | PIK3CA | cna | hetloss | BASIS      |
| PD23562           | PIK3CA | cna | amp     | BASIS      |
| PD23574           | PIK3CA | cna | gain    | BASIS      |
| PD23578           | PIK3CA | cna | gain    | BASIS      |
| PD24186           | PIK3CA | cna | amp     | BASIS      |
| PD24202           | PIK3CA | cna | gain    | BASIS      |
| PD24206           | PIK3CA | cna | gain    | BASIS      |
| PD3905            | PIK3CA | cna | gain    | BASIS      |
| PD4005            | PIK3CA | cna | gain    | BASIS      |
| PD4107            | PIK3CA | cna | gain    | BASIS      |
| PD4826            | PIK3CA | cna | gain    | BASIS      |
| PD5935            | PIK3CA | cna | amp     | BASIS      |
| PD5945            | PIK3CA | cna | amp     | BASIS      |
| PD5948            | PIK3CA | cna | gain    | BASIS      |
| PD6406            | PIK3CA | cna | gain    | BASIS      |
| PD7067            | PIK3CA | cna | gain    | BASIS      |
| PD7215            | PIK3CA | cna | gain    | BASIS      |
| PD8621            | PIK3CA | cna | gain    | BASIS      |
| PD8980            | PIK3CA | cna | gain    | BASIS      |
| PD9702            | PIK3CA | cna | amp     | BASIS      |
| TCGA-A2-A25B      | PPP6C  | cna | gain    | TCGA       |
| TCGA-AN-A0XU      | PPP6C  | cna | hetloss | TCGA       |

|              |       |     |         |          |
|--------------|-------|-----|---------|----------|
| TCGA-AO-A0JL | PPP6C | cna | hetloss | TCGA     |
| TCGA-BH-A0C0 | PPP6C | cna | gain    | TCGA     |
| TCGA-C8-A12L | PPP6C | cna | gain    | TCGA     |
| TCGA-E2-A1L7 | PPP6C | cna | gain    | TCGA     |
| TCGA-E9-A1NC | PPP6C | cna | hetloss | TCGA     |
| TCGA-LL-A5YP | PPP6C | cna | hetloss | TCGA     |
| MB-0346      | PPP6C | cna | hetloss | METABRIC |
| MB-2827      | PPP6C | cna | hetloss | METABRIC |
| MB-5070      | PPP6C | cna | hetloss | METABRIC |
| MB-5107      | PPP6C | cna | gain    | METABRIC |
| MB-7038      | PPP6C | cna | hetloss | METABRIC |
| MB-0420      | PPP6C | cna | hetloss | METABRIC |
| PD10014      | PPP6C | cna | gain    | BASIS    |
| PD11327      | PPP6C | cna | hetloss | BASIS    |
| PD13297      | PPP6C | cna | hetloss | BASIS    |
| PD13299      | PPP6C | cna | gain    | BASIS    |
| PD23562      | PPP6C | cna | gain    | BASIS    |
| PD23578      | PPP6C | cna | hetloss | BASIS    |
| PD24186      | PPP6C | cna | amp     | BASIS    |
| PD24202      | PPP6C | cna | hetloss | BASIS    |
| PD24206      | PPP6C | cna | gain    | BASIS    |
| PD24337      | PPP6C | cna | hetloss | BASIS    |
| PD3890       | PPP6C | cna | hetloss | BASIS    |
| PD3905       | PPP6C | cna | gain    | BASIS    |
| PD4005       | PPP6C | cna | hetloss | BASIS    |
| PD4006       | PPP6C | cna | gain    | BASIS    |
| PD4107       | PPP6C | cna | hetloss | BASIS    |
| PD4967       | PPP6C | cna | hetloss | BASIS    |
| PD5930       | PPP6C | cna | gain    | BASIS    |
| PD5945       | PPP6C | cna | gain    | BASIS    |
| PD5948       | PPP6C | cna | gain    | BASIS    |
| PD6406       | PPP6C | cna | hetloss | BASIS    |
| PD6731       | PPP6C | cna | hetloss | BASIS    |
| PD7067       | PPP6C | cna | gain    | BASIS    |
| PD7215       | PPP6C | cna | gain    | BASIS    |
| PD8621       | PPP6C | cna | gain    | BASIS    |
| PD8980       | PPP6C | cna | gain    | BASIS    |
| PD9004       | PPP6C | cna | hetloss | BASIS    |
| PD9585       | PPP6C | cna | hetloss | BASIS    |
| TCGA-A2-A25B | PRDM1 | cna | hetloss | TCGA     |
| TCGA-AN-A0XU | PRDM1 | cna | amp     | TCGA     |
| TCGA-AO-A0JL | PRDM1 | cna | hetloss | TCGA     |
| TCGA-BH-A0AW | PRDM1 | cna | gain    | TCGA     |
| TCGA-BH-A18R | PRDM1 | cna | homdel  | TCGA     |
| TCGA-C8-A12L | PRDM1 | cna | gain    | TCGA     |
| TCGA-D8-A27M | PRDM1 | cna | hetloss | TCGA     |
| TCGA-E2-A1L7 | PRDM1 | cna | gain    | TCGA     |

|              |       |     |         |          |
|--------------|-------|-----|---------|----------|
| MB-2827      | PRDM1 | cna | amp     | METABRIC |
| MB-5070      | PRDM1 | cna | amp     | METABRIC |
| MB-5107      | PRDM1 | cna | hetloss | METABRIC |
| MB-6098      | PRDM1 | cna | hetloss | METABRIC |
| MB-7032      | PRDM1 | cna | hetloss | METABRIC |
| MB-7038      | PRDM1 | cna | gain    | METABRIC |
| MB-7048      | PRDM1 | cna | hetloss | METABRIC |
| MTS-T0064    | PRDM1 | cna | amp     | METABRIC |
| PD11327      | PRDM1 | cna | gain    | BASIS    |
| PD13296      | PRDM1 | cna | gain    | BASIS    |
| PD13299      | PRDM1 | cna | gain    | BASIS    |
| PD13771      | PRDM1 | cna | hetloss | BASIS    |
| PD22355      | PRDM1 | cna | gain    | BASIS    |
| PD23562      | PRDM1 | cna | gain    | BASIS    |
| PD23574      | PRDM1 | cna | gain    | BASIS    |
| PD24186      | PRDM1 | cna | gain    | BASIS    |
| PD24206      | PRDM1 | cna | gain    | BASIS    |
| PD24337      | PRDM1 | cna | hetloss | BASIS    |
| PD3905       | PRDM1 | cna | gain    | BASIS    |
| PD4006       | PRDM1 | cna | gain    | BASIS    |
| PD4107       | PRDM1 | cna | hetloss | BASIS    |
| PD4826       | PRDM1 | cna | gain    | BASIS    |
| PD5935       | PRDM1 | cna | gain    | BASIS    |
| PD5945       | PRDM1 | cna | amp     | BASIS    |
| PD6406       | PRDM1 | cna | hetloss | BASIS    |
| PD6731       | PRDM1 | cna | hetloss | BASIS    |
| PD7067       | PRDM1 | cna | gain    | BASIS    |
| PD7215       | PRDM1 | cna | gain    | BASIS    |
| PD8621       | PRDM1 | cna | gain    | BASIS    |
| PD8980       | PRDM1 | cna | gain    | BASIS    |
| PD9004       | PRDM1 | cna | gain    | BASIS    |
| PD9585       | PRDM1 | cna | hetloss | BASIS    |
| PD9702       | PRDM1 | cna | gain    | BASIS    |
| TCGA-A2-A25B | PREX2 | cna | gain    | TCGA     |
| TCGA-AO-A0JL | PREX2 | cna | amp     | TCGA     |
| TCGA-BH-A0AW | PREX2 | cna | gain    | TCGA     |
| TCGA-BH-A0C0 | PREX2 | cna | amp     | TCGA     |
| TCGA-BH-A18R | PREX2 | cna | homdel  | TCGA     |
| TCGA-BH-A1FU | PREX2 | cna | gain    | TCGA     |
| TCGA-D8-A27M | PREX2 | cna | amp     | TCGA     |
| TCGA-E2-A1L7 | PREX2 | cna | gain    | TCGA     |
| TCGA-LL-A5YP | PREX2 | cna | gain    | TCGA     |
| MB-0346      | PREX2 | cna | amp     | METABRIC |
| MB-2827      | PREX2 | cna | amp     | METABRIC |
| MB-5465      | PREX2 | cna | hetloss | METABRIC |
| MB-6060      | PREX2 | cna | amp     | METABRIC |
| MB-6098      | PREX2 | cna | amp     | METABRIC |

|              |       |     |         |          |
|--------------|-------|-----|---------|----------|
| MB-7038      | PREX2 | cna | gain    | METABRIC |
| MB-0420      | PREX2 | cna | gain    | METABRIC |
| PD10014      | PREX2 | cna | amp     | BASIS    |
| PD11327      | PREX2 | cna | amp     | BASIS    |
| PD13296      | PREX2 | cna | homdel  | BASIS    |
| PD13299      | PREX2 | cna | gain    | BASIS    |
| PD13771      | PREX2 | cna | gain    | BASIS    |
| PD23562      | PREX2 | cna | gain    | BASIS    |
| PD23574      | PREX2 | cna | gain    | BASIS    |
| PD24186      | PREX2 | cna | gain    | BASIS    |
| PD24206      | PREX2 | cna | amp     | BASIS    |
| PD3890       | PREX2 | cna | gain    | BASIS    |
| PD3905       | PREX2 | cna | gain    | BASIS    |
| PD4005       | PREX2 | cna | hetloss | BASIS    |
| PD4006       | PREX2 | cna | gain    | BASIS    |
| PD4826       | PREX2 | cna | amp     | BASIS    |
| PD5935       | PREX2 | cna | gain    | BASIS    |
| PD5945       | PREX2 | cna | gain    | BASIS    |
| PD5948       | PREX2 | cna | gain    | BASIS    |
| PD6406       | PREX2 | cna | gain    | BASIS    |
| PD7067       | PREX2 | cna | amp     | BASIS    |
| PD7215       | PREX2 | cna | amp     | BASIS    |
| PD8621       | PREX2 | cna | gain    | BASIS    |
| PD8980       | PREX2 | cna | gain    | BASIS    |
| PD9004       | PREX2 | cna | gain    | BASIS    |
| PD9585       | PREX2 | cna | hetloss | BASIS    |
| PD9702       | PREX2 | cna | gain    | BASIS    |
| TCGA-AN-A0XU | RAD51 | cna | hetloss | TCGA     |
| TCGA-AO-A0JL | RAD51 | cna | hetloss | TCGA     |
| TCGA-BH-A0C0 | RAD51 | cna | hetloss | TCGA     |
| TCGA-C8-A12L | RAD51 | cna | hetloss | TCGA     |
| TCGA-D8-A27M | RAD51 | cna | hetloss | TCGA     |
| TCGA-E2-A1L7 | RAD51 | cna | hetloss | TCGA     |
| TCGA-E9-A1NC | RAD51 | cna | hetloss | TCGA     |
| TCGA-LL-A5YP | RAD51 | cna | hetloss | TCGA     |
| MB-2827      | RAD51 | cna | hetloss | METABRIC |
| MB-5070      | RAD51 | cna | hetloss | METABRIC |
| MB-5107      | RAD51 | cna | gain    | METABRIC |
| MB-5465      | RAD51 | cna | hetloss | METABRIC |
| MB-6060      | RAD51 | cna | hetloss | METABRIC |
| MB-6098      | RAD51 | cna | hetloss | METABRIC |
| MB-7048      | RAD51 | cna | hetloss | METABRIC |
| MB-0420      | RAD51 | cna | hetloss | METABRIC |
| PD10014      | RAD51 | cna | hetloss | BASIS    |
| PD11327      | RAD51 | cna | homdel  | BASIS    |
| PD11742      | RAD51 | cna | hetloss | BASIS    |
| PD13297      | RAD51 | cna | hetloss | BASIS    |

|              |          |     |         |          |
|--------------|----------|-----|---------|----------|
| PD13299      | RAD51    | cna | hetloss | BASIS    |
| PD22355      | RAD51    | cna | hetloss | BASIS    |
| PD23574      | RAD51    | cna | hetloss | BASIS    |
| PD23578      | RAD51    | cna | hetloss | BASIS    |
| PD24202      | RAD51    | cna | hetloss | BASIS    |
| PD24206      | RAD51    | cna | gain    | BASIS    |
| PD24337      | RAD51    | cna | hetloss | BASIS    |
| PD3890       | RAD51    | cna | hetloss | BASIS    |
| PD3905       | RAD51    | cna | gain    | BASIS    |
| PD4005       | RAD51    | cna | homdel  | BASIS    |
| PD4967       | RAD51    | cna | hetloss | BASIS    |
| PD5930       | RAD51    | cna | hetloss | BASIS    |
| PD5945       | RAD51    | cna | gain    | BASIS    |
| PD5948       | RAD51    | cna | hetloss | BASIS    |
| PD6413       | RAD51    | cna | hetloss | BASIS    |
| PD7067       | RAD51    | cna | gain    | BASIS    |
| PD7215       | RAD51    | cna | gain    | BASIS    |
| PD8980       | RAD51    | cna | hetloss | BASIS    |
| PD9004       | RAD51    | cna | hetloss | BASIS    |
| PD9585       | RAD51    | cna | hetloss | BASIS    |
| PD9702       | RAD51    | cna | gain    | BASIS    |
| TCGA-A2-A25B | RAP1GDS1 | cna | hetloss | TCGA     |
| TCGA-AN-A0XU | RAP1GDS1 | cna | hetloss | TCGA     |
| TCGA-AO-A0JL | RAP1GDS1 | cna | gain    | TCGA     |
| TCGA-BH-A0AW | RAP1GDS1 | cna | hetloss | TCGA     |
| TCGA-BH-A0C0 | RAP1GDS1 | cna | hetloss | TCGA     |
| TCGA-BH-A1FU | RAP1GDS1 | cna | gain    | TCGA     |
| TCGA-C8-A12L | RAP1GDS1 | cna | hetloss | TCGA     |
| TCGA-D8-A27M | RAP1GDS1 | cna | gain    | TCGA     |
| TCGA-E2-A1L7 | RAP1GDS1 | cna | gain    | TCGA     |
| TCGA-E9-A1NC | RAP1GDS1 | cna | hetloss | TCGA     |
| TCGA-LL-A5YP | RAP1GDS1 | cna | gain    | TCGA     |
| MB-2827      | RAP1GDS1 | cna | hetloss | METABRIC |
| MB-5070      | RAP1GDS1 | cna | hetloss | METABRIC |
| MB-5465      | RAP1GDS1 | cna | hetloss | METABRIC |
| MB-7048      | RAP1GDS1 | cna | hetloss | METABRIC |
| MB-0420      | RAP1GDS1 | cna | hetloss | METABRIC |
| PD10014      | RAP1GDS1 | cna | gain    | BASIS    |
| PD11742      | RAP1GDS1 | cna | hetloss | BASIS    |
| PD13296      | RAP1GDS1 | cna | hetloss | BASIS    |
| PD13297      | RAP1GDS1 | cna | hetloss | BASIS    |
| PD13771      | RAP1GDS1 | cna | gain    | BASIS    |
| PD23562      | RAP1GDS1 | cna | gain    | BASIS    |
| PD23578      | RAP1GDS1 | cna | hetloss | BASIS    |
| PD24206      | RAP1GDS1 | cna | gain    | BASIS    |
| PD24337      | RAP1GDS1 | cna | hetloss | BASIS    |
| PD3890       | RAP1GDS1 | cna | gain    | BASIS    |

|                   |          |     |         |            |
|-------------------|----------|-----|---------|------------|
| PD3905            | RAP1GDS1 | cna | gain    | BASIS      |
| PD4006            | RAP1GDS1 | cna | hetloss | BASIS      |
| PD4107            | RAP1GDS1 | cna | gain    | BASIS      |
| PD5930            | RAP1GDS1 | cna | hetloss | BASIS      |
| PD5935            | RAP1GDS1 | cna | gain    | BASIS      |
| PD5945            | RAP1GDS1 | cna | gain    | BASIS      |
| PD5948            | RAP1GDS1 | cna | gain    | BASIS      |
| PD6406            | RAP1GDS1 | cna | hetloss | BASIS      |
| PD6413            | RAP1GDS1 | cna | hetloss | BASIS      |
| PD6731            | RAP1GDS1 | cna | hetloss | BASIS      |
| PD7067            | RAP1GDS1 | cna | gain    | BASIS      |
| PD7215            | RAP1GDS1 | cna | gain    | BASIS      |
| PD8621            | RAP1GDS1 | cna | hetloss | BASIS      |
| PD8980            | RAP1GDS1 | cna | hetloss | BASIS      |
| PD9585            | RAP1GDS1 | cna | hetloss | BASIS      |
| TCGA-AN-A0XU      | RHOA     | cna | hetloss | TCGA       |
| TCGA-BH-A0C0      | RHOA     | cna | hetloss | TCGA       |
| TCGA-BH-A18R      | RHOA     | cna | gain    | TCGA       |
| TCGA-BH-A1FU      | RHOA     | cna | hetloss | TCGA       |
| TCGA-C8-A12L      | RHOA     | cna | hetloss | TCGA       |
| TCGA-D8-A27M      | RHOA     | cna | hetloss | TCGA       |
| TCGA-E2-A1L7      | RHOA     | cna | hetloss | TCGA       |
| TCGA-E9-A1NC      | RHOA     | cna | hetloss | TCGA       |
| TCGA-LL-A5YP      | RHOA     | cna | hetloss | TCGA       |
| MB-0346           | RHOA     | cna | hetloss | METABRIC   |
| MB-2827           | RHOA     | cna | hetloss | METABRIC   |
| MB-5107           | RHOA     | cna | hetloss | METABRIC   |
| MB-5465           | RHOA     | cna | hetloss | METABRIC   |
| MB-7038           | RHOA     | cna | hetloss | METABRIC   |
| MB-7048           | RHOA     | cna | hetloss | METABRIC   |
| MB-0420           | RHOA     | cna | hetloss | METABRIC   |
| P-0009557-T01-IM5 | RHOA     | cna | homdel  | MSK-IMPACT |
| PD10014           | RHOA     | cna | hetloss | BASIS      |
| PD11327           | RHOA     | cna | homdel  | BASIS      |
| PD13296           | RHOA     | cna | hetloss | BASIS      |
| PD13297           | RHOA     | cna | hetloss | BASIS      |
| PD13299           | RHOA     | cna | gain    | BASIS      |
| PD13771           | RHOA     | cna | hetloss | BASIS      |
| PD14442           | RHOA     | cna | hetloss | BASIS      |
| PD22355           | RHOA     | cna | hetloss | BASIS      |
| PD23561           | RHOA     | cna | hetloss | BASIS      |
| PD23578           | RHOA     | cna | hetloss | BASIS      |
| PD24202           | RHOA     | cna | hetloss | BASIS      |
| PD24206           | RHOA     | cna | hetloss | BASIS      |
| PD24337           | RHOA     | cna | hetloss | BASIS      |
| PD3890            | RHOA     | cna | hetloss | BASIS      |
| PD3905            | RHOA     | cna | gain    | BASIS      |

|                   |       |     |         |            |
|-------------------|-------|-----|---------|------------|
| PD4005            | RHOA  | cna | hetloss | BASIS      |
| PD4826            | RHOA  | cna | gain    | BASIS      |
| PD5945            | RHOA  | cna | gain    | BASIS      |
| PD6406            | RHOA  | cna | hetloss | BASIS      |
| PD6413            | RHOA  | cna | hetloss | BASIS      |
| PD6731            | RHOA  | cna | hetloss | BASIS      |
| PD7067            | RHOA  | cna | gain    | BASIS      |
| PD8980            | RHOA  | cna | hetloss | BASIS      |
| PD9585            | RHOA  | cna | hetloss | BASIS      |
| TCGA-A2-A25B      | RNF43 | cna | amp     | TCGA       |
| TCGA-AN-A0XU      | RNF43 | cna | gain    | TCGA       |
| TCGA-AO-A0JL      | RNF43 | cna | hetloss | TCGA       |
| TCGA-BH-A0AW      | RNF43 | cna | amp     | TCGA       |
| TCGA-BH-A0C0      | RNF43 | cna | gain    | TCGA       |
| TCGA-BH-A18R      | RNF43 | cna | amp     | TCGA       |
| TCGA-C8-A12L      | RNF43 | cna | gain    | TCGA       |
| TCGA-D8-A27M      | RNF43 | cna | hetloss | TCGA       |
| TCGA-EW-A10X      | RNF43 | cna | amp     | TCGA       |
| MB-0346           | RNF43 | cna | gain    | METABRIC   |
| MB-2827           | RNF43 | cna | hetloss | METABRIC   |
| MB-5070           | RNF43 | cna | hetloss | METABRIC   |
| MB-5107           | RNF43 | cna | amp     | METABRIC   |
| MB-5323           | RNF43 | cna | gain    | METABRIC   |
| MB-6060           | RNF43 | cna | hetloss | METABRIC   |
| MB-6098           | RNF43 | cna | hetloss | METABRIC   |
| MB-6271           | RNF43 | cna | hetloss | METABRIC   |
| MB-7048           | RNF43 | cna | hetloss | METABRIC   |
| P-0002858-T01-IM3 | RNF43 | cna | amp     | MSK-IMPACT |
| PD11327           | RNF43 | cna | gain    | BASIS      |
| PD11742           | RNF43 | cna | gain    | BASIS      |
| PD13299           | RNF43 | cna | gain    | BASIS      |
| PD22355           | RNF43 | cna | gain    | BASIS      |
| PD23562           | RNF43 | cna | gain    | BASIS      |
| PD23574           | RNF43 | cna | gain    | BASIS      |
| PD24186           | RNF43 | cna | gain    | BASIS      |
| PD24337           | RNF43 | cna | hetloss | BASIS      |
| PD3890            | RNF43 | cna | hetloss | BASIS      |
| PD3905            | RNF43 | cna | gain    | BASIS      |
| PD4006            | RNF43 | cna | amp     | BASIS      |
| PD5930            | RNF43 | cna | gain    | BASIS      |
| PD5945            | RNF43 | cna | amp     | BASIS      |
| PD5948            | RNF43 | cna | gain    | BASIS      |
| PD6406            | RNF43 | cna | hetloss | BASIS      |
| PD6731            | RNF43 | cna | hetloss | BASIS      |
| PD7067            | RNF43 | cna | gain    | BASIS      |
| PD7215            | RNF43 | cna | gain    | BASIS      |
| PD8621            | RNF43 | cna | gain    | BASIS      |



|              |        |     |         |          |
|--------------|--------|-----|---------|----------|
| PD8980       | RNF43  | cna | gain    | BASIS    |
| PD9004       | RNF43  | cna | gain    | BASIS    |
| PD9702       | RNF43  | cna | gain    | BASIS    |
| TCGA-A2-A25B | RPL35A | cna | amp     | TCGA     |
| TCGA-AN-A0XU | RPL35A | cna | gain    | TCGA     |
| TCGA-BH-A0AW | RPL35A | cna | gain    | TCGA     |
| TCGA-BH-A0C0 | RPL35A | cna | gain    | TCGA     |
| TCGA-BH-A1FU | RPL35A | cna | hetloss | TCGA     |
| TCGA-C8-A12L | RPL35A | cna | gain    | TCGA     |
| TCGA-D8-A27M | RPL35A | cna | hetloss | TCGA     |
| TCGA-LL-A5YP | RPL35A | cna | gain    | TCGA     |
| MB-0346      | RPL35A | cna | gain    | METABRIC |
| MB-2827      | RPL35A | cna | hetloss | METABRIC |
| MB-5070      | RPL35A | cna | hetloss | METABRIC |
| MB-5107      | RPL35A | cna | amp     | METABRIC |
| MB-5465      | RPL35A | cna | gain    | METABRIC |
| MB-6060      | RPL35A | cna | gain    | METABRIC |
| MB-6098      | RPL35A | cna | gain    | METABRIC |
| MB-7038      | RPL35A | cna | hetloss | METABRIC |
| PD11327      | RPL35A | cna | hetloss | BASIS    |
| PD13296      | RPL35A | cna | hetloss | BASIS    |
| PD13299      | RPL35A | cna | gain    | BASIS    |
| PD13771      | RPL35A | cna | hetloss | BASIS    |
| PD22355      | RPL35A | cna | gain    | BASIS    |
| PD23561      | RPL35A | cna | hetloss | BASIS    |
| PD23562      | RPL35A | cna | gain    | BASIS    |
| PD23578      | RPL35A | cna | gain    | BASIS    |
| PD24186      | RPL35A | cna | amp     | BASIS    |
| PD24202      | RPL35A | cna | gain    | BASIS    |
| PD3890       | RPL35A | cna | hetloss | BASIS    |
| PD3905       | RPL35A | cna | gain    | BASIS    |
| PD4005       | RPL35A | cna | gain    | BASIS    |
| PD4107       | RPL35A | cna | gain    | BASIS    |
| PD4967       | RPL35A | cna | hetloss | BASIS    |
| PD5930       | RPL35A | cna | gain    | BASIS    |
| PD5945       | RPL35A | cna | amp     | BASIS    |
| PD5948       | RPL35A | cna | gain    | BASIS    |
| PD6406       | RPL35A | cna | gain    | BASIS    |
| PD6731       | RPL35A | cna | gain    | BASIS    |
| PD7067       | RPL35A | cna | gain    | BASIS    |
| PD7215       | RPL35A | cna | gain    | BASIS    |
| PD8980       | RPL35A | cna | gain    | BASIS    |
| PD9004       | RPL35A | cna | gain    | BASIS    |
| PD9702       | RPL35A | cna | gain    | BASIS    |
| TCGA-AN-A0XU | SERP2  | cna | hetloss | TCGA     |
| TCGA-AO-A0JL | SERP2  | cna | hetloss | TCGA     |
| TCGA-BH-A0AW | SERP2  | cna | hetloss | TCGA     |

|              |       |     |         |          |
|--------------|-------|-----|---------|----------|
| TCGA-BH-A0C0 | SERP2 | cna | hetloss | TCGA     |
| TCGA-BH-A1FU | SERP2 | cna | hetloss | TCGA     |
| TCGA-C8-A12L | SERP2 | cna | gain    | TCGA     |
| TCGA-LL-A5YP | SERP2 | cna | hetloss | TCGA     |
| MB-0346      | SERP2 | cna | hetloss | METABRIC |
| MB-2827      | SERP2 | cna | hetloss | METABRIC |
| MB-5107      | SERP2 | cna | hetloss | METABRIC |
| MB-6098      | SERP2 | cna | hetloss | METABRIC |
| MB-7032      | SERP2 | cna | hetloss | METABRIC |
| MB-7038      | SERP2 | cna | hetloss | METABRIC |
| MB-7048      | SERP2 | cna | hetloss | METABRIC |
| MB-0420      | SERP2 | cna | hetloss | METABRIC |
| MTS-T0064    | SERP2 | cna | hetloss | METABRIC |
| PD10014      | SERP2 | cna | hetloss | BASIS    |
| PD11742      | SERP2 | cna | hetloss | BASIS    |
| PD13296      | SERP2 | cna | hetloss | BASIS    |
| PD13297      | SERP2 | cna | hetloss | BASIS    |
| PD13771      | SERP2 | cna | hetloss | BASIS    |
| PD14442      | SERP2 | cna | hetloss | BASIS    |
| PD22355      | SERP2 | cna | hetloss | BASIS    |
| PD23574      | SERP2 | cna | hetloss | BASIS    |
| PD24202      | SERP2 | cna | hetloss | BASIS    |
| PD24206      | SERP2 | cna | gain    | BASIS    |
| PD3890       | SERP2 | cna | hetloss | BASIS    |
| PD3905       | SERP2 | cna | gain    | BASIS    |
| PD4005       | SERP2 | cna | homdel  | BASIS    |
| PD4006       | SERP2 | cna | hetloss | BASIS    |
| PD4826       | SERP2 | cna | hetloss | BASIS    |
| PD4967       | SERP2 | cna | hetloss | BASIS    |
| PD5945       | SERP2 | cna | gain    | BASIS    |
| PD6406       | SERP2 | cna | hetloss | BASIS    |
| PD6731       | SERP2 | cna | hetloss | BASIS    |
| PD7215       | SERP2 | cna | gain    | BASIS    |
| PD8621       | SERP2 | cna | hetloss | BASIS    |
| PD8980       | SERP2 | cna | hetloss | BASIS    |
| PD9004       | SERP2 | cna | hetloss | BASIS    |
| PD9585       | SERP2 | cna | gain    | BASIS    |
| PD9702       | SERP2 | cna | gain    | BASIS    |
| TCGA-A2-A25B | SGK1  | cna | hetloss | TCGA     |
| TCGA-AN-A0XU | SGK1  | cna | amp     | TCGA     |
| TCGA-AO-A0JL | SGK1  | cna | hetloss | TCGA     |
| TCGA-BH-A0AW | SGK1  | cna | amp     | TCGA     |
| TCGA-BH-A0C0 | SGK1  | cna | gain    | TCGA     |
| TCGA-BH-A18R | SGK1  | cna | gain    | TCGA     |
| TCGA-C8-A12L | SGK1  | cna | gain    | TCGA     |
| TCGA-D8-A27M | SGK1  | cna | hetloss | TCGA     |
| MB-5070      | SGK1  | cna | gain    | METABRIC |

|              |      |     |         |          |
|--------------|------|-----|---------|----------|
| MB-6098      | SGK1 | cna | hetloss | METABRIC |
| MB-7032      | SGK1 | cna | hetloss | METABRIC |
| MB-7038      | SGK1 | cna | amp     | METABRIC |
| MB-7048      | SGK1 | cna | hetloss | METABRIC |
| MB-0420      | SGK1 | cna | hetloss | METABRIC |
| PD11327      | SGK1 | cna | homdel  | BASIS    |
| PD13296      | SGK1 | cna | gain    | BASIS    |
| PD13299      | SGK1 | cna | gain    | BASIS    |
| PD13771      | SGK1 | cna | hetloss | BASIS    |
| PD22355      | SGK1 | cna | gain    | BASIS    |
| PD23562      | SGK1 | cna | gain    | BASIS    |
| PD23574      | SGK1 | cna | gain    | BASIS    |
| PD23578      | SGK1 | cna | hetloss | BASIS    |
| PD24186      | SGK1 | cna | gain    | BASIS    |
| PD24202      | SGK1 | cna | gain    | BASIS    |
| PD3890       | SGK1 | cna | gain    | BASIS    |
| PD3905       | SGK1 | cna | gain    | BASIS    |
| PD4005       | SGK1 | cna | hetloss | BASIS    |
| PD4006       | SGK1 | cna | gain    | BASIS    |
| PD4107       | SGK1 | cna | amp     | BASIS    |
| PD4826       | SGK1 | cna | gain    | BASIS    |
| PD5935       | SGK1 | cna | gain    | BASIS    |
| PD5945       | SGK1 | cna | amp     | BASIS    |
| PD6406       | SGK1 | cna | hetloss | BASIS    |
| PD6731       | SGK1 | cna | hetloss | BASIS    |
| PD7067       | SGK1 | cna | amp     | BASIS    |
| PD7215       | SGK1 | cna | gain    | BASIS    |
| PD8621       | SGK1 | cna | gain    | BASIS    |
| PD8980       | SGK1 | cna | gain    | BASIS    |
| PD9004       | SGK1 | cna | gain    | BASIS    |
| PD9585       | SGK1 | cna | hetloss | BASIS    |
| PD9702       | SGK1 | cna | gain    | BASIS    |
| TCGA-A2-A25B | SOX2 | cna | amp     | TCGA     |
| TCGA-AN-A0XU | SOX2 | cna | gain    | TCGA     |
| TCGA-BH-A0AW | SOX2 | cna | gain    | TCGA     |
| TCGA-BH-A0C0 | SOX2 | cna | gain    | TCGA     |
| TCGA-BH-A1FU | SOX2 | cna | hetloss | TCGA     |
| TCGA-C8-A12L | SOX2 | cna | gain    | TCGA     |
| TCGA-E2-A1L7 | SOX2 | cna | gain    | TCGA     |
| TCGA-LL-A5YP | SOX2 | cna | gain    | TCGA     |
| MB-0346      | SOX2 | cna | gain    | METABRIC |
| MB-5070      | SOX2 | cna | amp     | METABRIC |
| MB-5107      | SOX2 | cna | amp     | METABRIC |
| MB-6060      | SOX2 | cna | gain    | METABRIC |
| MB-6098      | SOX2 | cna | gain    | METABRIC |
| MB-7038      | SOX2 | cna | hetloss | METABRIC |
| MB-0420      | SOX2 | cna | gain    | METABRIC |

|                   |        |     |         |            |
|-------------------|--------|-----|---------|------------|
| MTS-T0064         | SOX2   | cna | amp     | METABRIC   |
| P-0002858-T01-IM3 | SOX2   | cna | amp     | MSK-IMPACT |
| PD13296           | SOX2   | cna | gain    | BASIS      |
| PD13299           | SOX2   | cna | gain    | BASIS      |
| PD13771           | SOX2   | cna | hetloss | BASIS      |
| PD22355           | SOX2   | cna | gain    | BASIS      |
| PD23561           | SOX2   | cna | hetloss | BASIS      |
| PD23562           | SOX2   | cna | gain    | BASIS      |
| PD23578           | SOX2   | cna | gain    | BASIS      |
| PD24186           | SOX2   | cna | amp     | BASIS      |
| PD24202           | SOX2   | cna | gain    | BASIS      |
| PD24206           | SOX2   | cna | gain    | BASIS      |
| PD3905            | SOX2   | cna | gain    | BASIS      |
| PD4005            | SOX2   | cna | gain    | BASIS      |
| PD4107            | SOX2   | cna | gain    | BASIS      |
| PD4826            | SOX2   | cna | gain    | BASIS      |
| PD5935            | SOX2   | cna | amp     | BASIS      |
| PD5945            | SOX2   | cna | amp     | BASIS      |
| PD5948            | SOX2   | cna | gain    | BASIS      |
| PD6406            | SOX2   | cna | gain    | BASIS      |
| PD6731            | SOX2   | cna | gain    | BASIS      |
| PD7067            | SOX2   | cna | gain    | BASIS      |
| PD7215            | SOX2   | cna | gain    | BASIS      |
| PD8621            | SOX2   | cna | gain    | BASIS      |
| PD8980            | SOX2   | cna | gain    | BASIS      |
| PD9702            | SOX2   | cna | gain    | BASIS      |
| TCGA-A2-A25B      | SPECC1 | cna | gain    | TCGA       |
| TCGA-AN-A0XU      | SPECC1 | cna | hetloss | TCGA       |
| TCGA-AO-A0JL      | SPECC1 | cna | gain    | TCGA       |
| TCGA-BH-A0AW      | SPECC1 | cna | hetloss | TCGA       |
| TCGA-BH-A0C0      | SPECC1 | cna | hetloss | TCGA       |
| TCGA-C8-A12L      | SPECC1 | cna | hetloss | TCGA       |
| TCGA-D8-A27M      | SPECC1 | cna | hetloss | TCGA       |
| TCGA-E2-A1L7      | SPECC1 | cna | hetloss | TCGA       |
| TCGA-E9-A1NC      | SPECC1 | cna | hetloss | TCGA       |
| TCGA-LL-A5YP      | SPECC1 | cna | hetloss | TCGA       |
| MB-0346           | SPECC1 | cna | gain    | METABRIC   |
| MB-2827           | SPECC1 | cna | hetloss | METABRIC   |
| MB-5070           | SPECC1 | cna | hetloss | METABRIC   |
| MB-5465           | SPECC1 | cna | hetloss | METABRIC   |
| MB-6060           | SPECC1 | cna | amp     | METABRIC   |
| MB-6098           | SPECC1 | cna | hetloss | METABRIC   |
| MB-6271           | SPECC1 | cna | hetloss | METABRIC   |
| MB-7038           | SPECC1 | cna | hetloss | METABRIC   |
| MB-7048           | SPECC1 | cna | amp     | METABRIC   |
| MB-0420           | SPECC1 | cna | hetloss | METABRIC   |
| PD11327           | SPECC1 | cna | hetloss | BASIS      |

|              |        |     |         |          |
|--------------|--------|-----|---------|----------|
| PD11742      | SPECC1 | cna | hetloss | BASIS    |
| PD13297      | SPECC1 | cna | hetloss | BASIS    |
| PD13771      | SPECC1 | cna | hetloss | BASIS    |
| PD22355      | SPECC1 | cna | hetloss | BASIS    |
| PD23561      | SPECC1 | cna | hetloss | BASIS    |
| PD24202      | SPECC1 | cna | hetloss | BASIS    |
| PD24206      | SPECC1 | cna | hetloss | BASIS    |
| PD24337      | SPECC1 | cna | hetloss | BASIS    |
| PD3890       | SPECC1 | cna | hetloss | BASIS    |
| PD3905       | SPECC1 | cna | gain    | BASIS    |
| PD4005       | SPECC1 | cna | hetloss | BASIS    |
| PD4107       | SPECC1 | cna | gain    | BASIS    |
| PD4826       | SPECC1 | cna | hetloss | BASIS    |
| PD4967       | SPECC1 | cna | hetloss | BASIS    |
| PD5945       | SPECC1 | cna | gain    | BASIS    |
| PD6406       | SPECC1 | cna | hetloss | BASIS    |
| PD6413       | SPECC1 | cna | hetloss | BASIS    |
| PD6731       | SPECC1 | cna | hetloss | BASIS    |
| PD7067       | SPECC1 | cna | gain    | BASIS    |
| PD9585       | SPECC1 | cna | hetloss | BASIS    |
| TCGA-AN-A0XU | STAG1  | cna | gain    | TCGA     |
| TCGA-BH-A0C0 | STAG1  | cna | gain    | TCGA     |
| TCGA-BH-A18R | STAG1  | cna | gain    | TCGA     |
| TCGA-BH-A1FU | STAG1  | cna | hetloss | TCGA     |
| TCGA-C8-A12L | STAG1  | cna | gain    | TCGA     |
| TCGA-E2-A1L7 | STAG1  | cna | gain    | TCGA     |
| TCGA-E9-A1NC | STAG1  | cna | gain    | TCGA     |
| TCGA-LL-A5YP | STAG1  | cna | gain    | TCGA     |
| MB-0346      | STAG1  | cna | hetloss | METABRIC |
| MB-5070      | STAG1  | cna | gain    | METABRIC |
| MB-5107      | STAG1  | cna | gain    | METABRIC |
| MB-5465      | STAG1  | cna | gain    | METABRIC |
| MB-7038      | STAG1  | cna | gain    | METABRIC |
| MTS-T0064    | STAG1  | cna | gain    | METABRIC |
| PD10014      | STAG1  | cna | gain    | BASIS    |
| PD11327      | STAG1  | cna | hetloss | BASIS    |
| PD13297      | STAG1  | cna | hetloss | BASIS    |
| PD13299      | STAG1  | cna | gain    | BASIS    |
| PD13771      | STAG1  | cna | hetloss | BASIS    |
| PD22355      | STAG1  | cna | gain    | BASIS    |
| PD23561      | STAG1  | cna | hetloss | BASIS    |
| PD23574      | STAG1  | cna | gain    | BASIS    |
| PD23578      | STAG1  | cna | gain    | BASIS    |
| PD24186      | STAG1  | cna | gain    | BASIS    |
| PD24202      | STAG1  | cna | gain    | BASIS    |
| PD24206      | STAG1  | cna | gain    | BASIS    |
| PD3905       | STAG1  | cna | gain    | BASIS    |

|              |       |     |         |          |
|--------------|-------|-----|---------|----------|
| PD4006       | STAG1 | cna | hetloss | BASIS    |
| PD4107       | STAG1 | cna | gain    | BASIS    |
| PD4826       | STAG1 | cna | gain    | BASIS    |
| PD4967       | STAG1 | cna | hetloss | BASIS    |
| PD5935       | STAG1 | cna | gain    | BASIS    |
| PD5945       | STAG1 | cna | gain    | BASIS    |
| PD5948       | STAG1 | cna | gain    | BASIS    |
| PD6731       | STAG1 | cna | gain    | BASIS    |
| PD7067       | STAG1 | cna | gain    | BASIS    |
| PD7215       | STAG1 | cna | gain    | BASIS    |
| PD8621       | STAG1 | cna | gain    | BASIS    |
| PD8980       | STAG1 | cna | gain    | BASIS    |
| PD9004       | STAG1 | cna | gain    | BASIS    |
| PD9702       | STAG1 | cna | gain    | BASIS    |
| TCGA-A2-A25B | TFRC  | cna | amp     | TCGA     |
| TCGA-AN-A0XU | TFRC  | cna | gain    | TCGA     |
| TCGA-BH-A0AW | TFRC  | cna | gain    | TCGA     |
| TCGA-BH-A0C0 | TFRC  | cna | gain    | TCGA     |
| TCGA-BH-A1FU | TFRC  | cna | hetloss | TCGA     |
| TCGA-C8-A12L | TFRC  | cna | gain    | TCGA     |
| TCGA-D8-A27M | TFRC  | cna | hetloss | TCGA     |
| TCGA-LL-A5YP | TFRC  | cna | gain    | TCGA     |
| MB-0346      | TFRC  | cna | gain    | METABRIC |
| MB-2827      | TFRC  | cna | hetloss | METABRIC |
| MB-5070      | TFRC  | cna | hetloss | METABRIC |
| MB-5107      | TFRC  | cna | amp     | METABRIC |
| MB-5465      | TFRC  | cna | gain    | METABRIC |
| MB-6060      | TFRC  | cna | gain    | METABRIC |
| MB-6098      | TFRC  | cna | gain    | METABRIC |
| MB-7038      | TFRC  | cna | hetloss | METABRIC |
| PD10014      | TFRC  | cna | gain    | BASIS    |
| PD11327      | TFRC  | cna | hetloss | BASIS    |
| PD13296      | TFRC  | cna | hetloss | BASIS    |
| PD13299      | TFRC  | cna | gain    | BASIS    |
| PD13771      | TFRC  | cna | hetloss | BASIS    |
| PD22355      | TFRC  | cna | gain    | BASIS    |
| PD23561      | TFRC  | cna | hetloss | BASIS    |
| PD23562      | TFRC  | cna | gain    | BASIS    |
| PD23578      | TFRC  | cna | gain    | BASIS    |
| PD24186      | TFRC  | cna | amp     | BASIS    |
| PD24202      | TFRC  | cna | gain    | BASIS    |
| PD3905       | TFRC  | cna | gain    | BASIS    |
| PD4005       | TFRC  | cna | gain    | BASIS    |
| PD4107       | TFRC  | cna | gain    | BASIS    |
| PD4967       | TFRC  | cna | hetloss | BASIS    |
| PD5930       | TFRC  | cna | gain    | BASIS    |
| PD5945       | TFRC  | cna | amp     | BASIS    |

|              |       |     |         |          |
|--------------|-------|-----|---------|----------|
| PD5948       | TFRC  | cna | gain    | BASIS    |
| PD6406       | TFRC  | cna | gain    | BASIS    |
| PD6731       | TFRC  | cna | gain    | BASIS    |
| PD7067       | TFRC  | cna | gain    | BASIS    |
| PD7215       | TFRC  | cna | gain    | BASIS    |
| PD8980       | TFRC  | cna | gain    | BASIS    |
| PD9004       | TFRC  | cna | gain    | BASIS    |
| PD9702       | TFRC  | cna | gain    | BASIS    |
| TCGA-A2-A25B | WISP3 | cna | hetloss | TCGA     |
| TCGA-AN-A0XU | WISP3 | cna | amp     | TCGA     |
| TCGA-AO-A0JL | WISP3 | cna | hetloss | TCGA     |
| TCGA-BH-A0AW | WISP3 | cna | amp     | TCGA     |
| TCGA-BH-A18R | WISP3 | cna | gain    | TCGA     |
| TCGA-C8-A12L | WISP3 | cna | gain    | TCGA     |
| TCGA-D8-A27M | WISP3 | cna | hetloss | TCGA     |
| TCGA-LL-A5YP | WISP3 | cna | gain    | TCGA     |
| MB-2827      | WISP3 | cna | amp     | METABRIC |
| MB-5107      | WISP3 | cna | hetloss | METABRIC |
| MB-6098      | WISP3 | cna | hetloss | METABRIC |
| MB-7032      | WISP3 | cna | hetloss | METABRIC |
| MB-7038      | WISP3 | cna | gain    | METABRIC |
| MB-7048      | WISP3 | cna | hetloss | METABRIC |
| MTS-T0064    | WISP3 | cna | amp     | METABRIC |
| PD11327      | WISP3 | cna | gain    | BASIS    |
| PD13296      | WISP3 | cna | gain    | BASIS    |
| PD13299      | WISP3 | cna | gain    | BASIS    |
| PD13771      | WISP3 | cna | hetloss | BASIS    |
| PD22355      | WISP3 | cna | gain    | BASIS    |
| PD23562      | WISP3 | cna | gain    | BASIS    |
| PD23574      | WISP3 | cna | gain    | BASIS    |
| PD24186      | WISP3 | cna | gain    | BASIS    |
| PD24206      | WISP3 | cna | gain    | BASIS    |
| PD24337      | WISP3 | cna | hetloss | BASIS    |
| PD3905       | WISP3 | cna | gain    | BASIS    |
| PD4006       | WISP3 | cna | gain    | BASIS    |
| PD4107       | WISP3 | cna | hetloss | BASIS    |
| PD4826       | WISP3 | cna | gain    | BASIS    |
| PD5930       | WISP3 | cna | hetloss | BASIS    |
| PD5935       | WISP3 | cna | gain    | BASIS    |
| PD5945       | WISP3 | cna | amp     | BASIS    |
| PD6406       | WISP3 | cna | hetloss | BASIS    |
| PD6731       | WISP3 | cna | hetloss | BASIS    |
| PD7067       | WISP3 | cna | gain    | BASIS    |
| PD7215       | WISP3 | cna | gain    | BASIS    |
| PD8621       | WISP3 | cna | gain    | BASIS    |
| PD8980       | WISP3 | cna | gain    | BASIS    |
| PD9004       | WISP3 | cna | gain    | BASIS    |

|              |          |     |         |          |
|--------------|----------|-----|---------|----------|
| PD9585       | WISP3    | cna | hetloss | BASIS    |
| PD9702       | WISP3    | cna | gain    | BASIS    |
| TCGA-A2-A25B | XRCC3    | cna | gain    | TCGA     |
| TCGA-AN-A0XU | XRCC3    | cna | gain    | TCGA     |
| TCGA-AO-A0JL | XRCC3    | cna | hetloss | TCGA     |
| TCGA-BH-A0AW | XRCC3    | cna | hetloss | TCGA     |
| TCGA-BH-A1FU | XRCC3    | cna | gain    | TCGA     |
| TCGA-C8-A12L | XRCC3    | cna | gain    | TCGA     |
| TCGA-D8-A27M | XRCC3    | cna | hetloss | TCGA     |
| TCGA-E2-A1L7 | XRCC3    | cna | gain    | TCGA     |
| TCGA-E9-A1NC | XRCC3    | cna | hetloss | TCGA     |
| TCGA-LL-A5YP | XRCC3    | cna | hetloss | TCGA     |
| MB-0346      | XRCC3    | cna | gain    | METABRIC |
| MB-2827      | XRCC3    | cna | hetloss | METABRIC |
| MB-5070      | XRCC3    | cna | hetloss | METABRIC |
| MB-5107      | XRCC3    | cna | hetloss | METABRIC |
| MB-6060      | XRCC3    | cna | gain    | METABRIC |
| MB-6098      | XRCC3    | cna | gain    | METABRIC |
| MTS-T0064    | XRCC3    | cna | hetloss | METABRIC |
| PD10014      | XRCC3    | cna | hetloss | BASIS    |
| PD11742      | XRCC3    | cna | hetloss | BASIS    |
| PD13296      | XRCC3    | cna | gain    | BASIS    |
| PD13297      | XRCC3    | cna | hetloss | BASIS    |
| PD13299      | XRCC3    | cna | hetloss | BASIS    |
| PD13771      | XRCC3    | cna | hetloss | BASIS    |
| PD22355      | XRCC3    | cna | hetloss | BASIS    |
| PD23578      | XRCC3    | cna | hetloss | BASIS    |
| PD24202      | XRCC3    | cna | hetloss | BASIS    |
| PD24206      | XRCC3    | cna | gain    | BASIS    |
| PD24337      | XRCC3    | cna | hetloss | BASIS    |
| PD3890       | XRCC3    | cna | hetloss | BASIS    |
| PD3905       | XRCC3    | cna | gain    | BASIS    |
| PD4006       | XRCC3    | cna | gain    | BASIS    |
| PD4826       | XRCC3    | cna | gain    | BASIS    |
| PD4967       | XRCC3    | cna | hetloss | BASIS    |
| PD5945       | XRCC3    | cna | gain    | BASIS    |
| PD5948       | XRCC3    | cna | gain    | BASIS    |
| PD6406       | XRCC3    | cna | hetloss | BASIS    |
| PD6413       | XRCC3    | cna | hetloss | BASIS    |
| PD7067       | XRCC3    | cna | gain    | BASIS    |
| PD8621       | XRCC3    | cna | gain    | BASIS    |
| PD8980       | XRCC3    | cna | hetloss | BASIS    |
| PD9702       | XRCC3    | cna | gain    | BASIS    |
| TCGA-A2-A25B | AADAACL2 | cna | gain    | TCGA     |
| TCGA-AN-A0XU | AADAACL2 | cna | gain    | TCGA     |
| TCGA-BH-A0C0 | AADAACL2 | cna | gain    | TCGA     |
| TCGA-BH-A18R | AADAACL2 | cna | gain    | TCGA     |



|              |         |     |         |          |
|--------------|---------|-----|---------|----------|
| TCGA-BH-A1FU | AADACL2 | cna | hetloss | TCGA     |
| TCGA-C8-A12L | AADACL2 | cna | amp     | TCGA     |
| TCGA-E2-A1L7 | AADACL2 | cna | gain    | TCGA     |
| TCGA-E9-A1NC | AADACL2 | cna | gain    | TCGA     |
| TCGA-LL-A5YP | AADACL2 | cna | gain    | TCGA     |
| MB-0346      | AADACL2 | cna | hetloss | METABRIC |
| MB-5070      | AADACL2 | cna | amp     | METABRIC |
| MB-5107      | AADACL2 | cna | gain    | METABRIC |
| MB-5465      | AADACL2 | cna | amp     | METABRIC |
| MB-0420      | AADACL2 | cna | gain    | METABRIC |
| PD10014      | AADACL2 | cna | amp     | BASIS    |
| PD11327      | AADACL2 | cna | gain    | BASIS    |
| PD13296      | AADACL2 | cna | gain    | BASIS    |
| PD13299      | AADACL2 | cna | gain    | BASIS    |
| PD13771      | AADACL2 | cna | hetloss | BASIS    |
| PD22355      | AADACL2 | cna | gain    | BASIS    |
| PD23561      | AADACL2 | cna | hetloss | BASIS    |
| PD23562      | AADACL2 | cna | amp     | BASIS    |
| PD23574      | AADACL2 | cna | gain    | BASIS    |
| PD23578      | AADACL2 | cna | gain    | BASIS    |
| PD24186      | AADACL2 | cna | gain    | BASIS    |
| PD24202      | AADACL2 | cna | gain    | BASIS    |
| PD24206      | AADACL2 | cna | gain    | BASIS    |
| PD3905       | AADACL2 | cna | gain    | BASIS    |
| PD4107       | AADACL2 | cna | gain    | BASIS    |
| PD5930       | AADACL2 | cna | gain    | BASIS    |
| PD5935       | AADACL2 | cna | gain    | BASIS    |
| PD5945       | AADACL2 | cna | amp     | BASIS    |
| PD5948       | AADACL2 | cna | amp     | BASIS    |
| PD6731       | AADACL2 | cna | gain    | BASIS    |
| PD7067       | AADACL2 | cna | gain    | BASIS    |
| PD7215       | AADACL2 | cna | gain    | BASIS    |
| PD8621       | AADACL2 | cna | gain    | BASIS    |
| PD8980       | AADACL2 | cna | gain    | BASIS    |
| PD9004       | AADACL2 | cna | gain    | BASIS    |
| PD9702       | AADACL2 | cna | gain    | BASIS    |
| TCGA-AN-A0XU | ACSL6   | cna | hetloss | TCGA     |
| TCGA-AO-A0JL | ACSL6   | cna | hetloss | TCGA     |
| TCGA-BH-A0C0 | ACSL6   | cna | hetloss | TCGA     |
| TCGA-BH-A1FU | ACSL6   | cna | hetloss | TCGA     |
| TCGA-C8-A12L | ACSL6   | cna | hetloss | TCGA     |
| TCGA-D8-A27M | ACSL6   | cna | hetloss | TCGA     |
| TCGA-E2-A1L7 | ACSL6   | cna | gain    | TCGA     |
| TCGA-E9-A1NC | ACSL6   | cna | hetloss | TCGA     |
| TCGA-LL-A5YP | ACSL6   | cna | hetloss | TCGA     |
| MB-0346      | ACSL6   | cna | gain    | METABRIC |
| MB-2827      | ACSL6   | cna | hetloss | METABRIC |

|              |       |     |         |          |
|--------------|-------|-----|---------|----------|
| MB-5070      | ACSL6 | cna | hetloss | METABRIC |
| MB-5107      | ACSL6 | cna | hetloss | METABRIC |
| MB-5465      | ACSL6 | cna | hetloss | METABRIC |
| MB-6060      | ACSL6 | cna | hetloss | METABRIC |
| MB-6098      | ACSL6 | cna | hetloss | METABRIC |
| MB-7038      | ACSL6 | cna | hetloss | METABRIC |
| MB-0420      | ACSL6 | cna | hetloss | METABRIC |
| PD10014      | ACSL6 | cna | hetloss | BASIS    |
| PD13296      | ACSL6 | cna | hetloss | BASIS    |
| PD13297      | ACSL6 | cna | hetloss | BASIS    |
| PD13771      | ACSL6 | cna | gain    | BASIS    |
| PD22355      | ACSL6 | cna | hetloss | BASIS    |
| PD23562      | ACSL6 | cna | hetloss | BASIS    |
| PD23578      | ACSL6 | cna | hetloss | BASIS    |
| PD24202      | ACSL6 | cna | hetloss | BASIS    |
| PD24206      | ACSL6 | cna | gain    | BASIS    |
| PD24337      | ACSL6 | cna | hetloss | BASIS    |
| PD3890       | ACSL6 | cna | hetloss | BASIS    |
| PD3905       | ACSL6 | cna | gain    | BASIS    |
| PD4005       | ACSL6 | cna | hetloss | BASIS    |
| PD5935       | ACSL6 | cna | gain    | BASIS    |
| PD5945       | ACSL6 | cna | gain    | BASIS    |
| PD5948       | ACSL6 | cna | hetloss | BASIS    |
| PD6406       | ACSL6 | cna | hetloss | BASIS    |
| PD6413       | ACSL6 | cna | hetloss | BASIS    |
| PD7067       | ACSL6 | cna | gain    | BASIS    |
| PD8621       | ACSL6 | cna | hetloss | BASIS    |
| PD8980       | ACSL6 | cna | hetloss | BASIS    |
| PD9585       | ACSL6 | cna | hetloss | BASIS    |
| TCGA-A2-A25B | ALDH2 | cna | gain    | TCGA     |
| TCGA-AN-A0XU | ALDH2 | cna | hetloss | TCGA     |
| TCGA-AO-A0JL | ALDH2 | cna | hetloss | TCGA     |
| TCGA-BH-A0C0 | ALDH2 | cna | gain    | TCGA     |
| TCGA-BH-A18R | ALDH2 | cna | gain    | TCGA     |
| TCGA-BH-A1FU | ALDH2 | cna | hetloss | TCGA     |
| TCGA-C8-A12L | ALDH2 | cna | gain    | TCGA     |
| TCGA-D8-A27M | ALDH2 | cna | hetloss | TCGA     |
| TCGA-E2-A1L7 | ALDH2 | cna | gain    | TCGA     |
| TCGA-LL-A5YP | ALDH2 | cna | hetloss | TCGA     |
| MB-0346      | ALDH2 | cna | gain    | METABRIC |
| MB-2827      | ALDH2 | cna | hetloss | METABRIC |
| MB-5070      | ALDH2 | cna | hetloss | METABRIC |
| MB-5465      | ALDH2 | cna | hetloss | METABRIC |
| MB-6098      | ALDH2 | cna | hetloss | METABRIC |
| MB-7048      | ALDH2 | cna | hetloss | METABRIC |
| PD10014      | ALDH2 | cna | gain    | BASIS    |
| PD11327      | ALDH2 | cna | hetloss | BASIS    |

|              |       |     |         |          |
|--------------|-------|-----|---------|----------|
| PD11742      | ALDH2 | cna | hetloss | BASIS    |
| PD13296      | ALDH2 | cna | hetloss | BASIS    |
| PD13297      | ALDH2 | cna | gain    | BASIS    |
| PD22355      | ALDH2 | cna | hetloss | BASIS    |
| PD23574      | ALDH2 | cna | gain    | BASIS    |
| PD24337      | ALDH2 | cna | gain    | BASIS    |
| PD3890       | ALDH2 | cna | hetloss | BASIS    |
| PD3905       | ALDH2 | cna | gain    | BASIS    |
| PD4005       | ALDH2 | cna | hetloss | BASIS    |
| PD4006       | ALDH2 | cna | gain    | BASIS    |
| PD4107       | ALDH2 | cna | gain    | BASIS    |
| PD4826       | ALDH2 | cna | gain    | BASIS    |
| PD4967       | ALDH2 | cna | hetloss | BASIS    |
| PD5945       | ALDH2 | cna | gain    | BASIS    |
| PD5948       | ALDH2 | cna | gain    | BASIS    |
| PD6406       | ALDH2 | cna | hetloss | BASIS    |
| PD6413       | ALDH2 | cna | hetloss | BASIS    |
| PD6731       | ALDH2 | cna | hetloss | BASIS    |
| PD7067       | ALDH2 | cna | gain    | BASIS    |
| PD9004       | ALDH2 | cna | hetloss | BASIS    |
| PD9585       | ALDH2 | cna | hetloss | BASIS    |
| PD9702       | ALDH2 | cna | gain    | BASIS    |
| TCGA-AN-A0XU | BCL9  | cna | gain    | TCGA     |
| TCGA-AO-A0JL | BCL9  | cna | gain    | TCGA     |
| TCGA-BH-A0AW | BCL9  | cna | gain    | TCGA     |
| TCGA-BH-A0C0 | BCL9  | cna | hetloss | TCGA     |
| TCGA-BH-A18R | BCL9  | cna | gain    | TCGA     |
| TCGA-BH-A1FU | BCL9  | cna | gain    | TCGA     |
| TCGA-C8-A12L | BCL9  | cna | gain    | TCGA     |
| TCGA-E2-A1L7 | BCL9  | cna | gain    | TCGA     |
| TCGA-EW-A10X | BCL9  | cna | gain    | TCGA     |
| TCGA-LL-A5YP | BCL9  | cna | amp     | TCGA     |
| MB-2827      | BCL9  | cna | amp     | METABRIC |
| MB-5070      | BCL9  | cna | gain    | METABRIC |
| MB-6098      | BCL9  | cna | amp     | METABRIC |
| MB-7032      | BCL9  | cna | gain    | METABRIC |
| MB-7038      | BCL9  | cna | gain    | METABRIC |
| MB-0420      | BCL9  | cna | gain    | METABRIC |
| PD10014      | BCL9  | cna | gain    | BASIS    |
| PD11327      | BCL9  | cna | amp     | BASIS    |
| PD13296      | BCL9  | cna | gain    | BASIS    |
| PD13297      | BCL9  | cna | gain    | BASIS    |
| PD13299      | BCL9  | cna | gain    | BASIS    |
| PD14442      | BCL9  | cna | gain    | BASIS    |
| PD23562      | BCL9  | cna | amp     | BASIS    |
| PD23574      | BCL9  | cna | gain    | BASIS    |
| PD24186      | BCL9  | cna | gain    | BASIS    |

|              |       |     |         |          |
|--------------|-------|-----|---------|----------|
| PD24206      | BCL9  | cna | gain    | BASIS    |
| PD3905       | BCL9  | cna | gain    | BASIS    |
| PD4006       | BCL9  | cna | amp     | BASIS    |
| PD4107       | BCL9  | cna | gain    | BASIS    |
| PD4826       | BCL9  | cna | gain    | BASIS    |
| PD5930       | BCL9  | cna | gain    | BASIS    |
| PD5935       | BCL9  | cna | gain    | BASIS    |
| PD5945       | BCL9  | cna | gain    | BASIS    |
| PD5948       | BCL9  | cna | gain    | BASIS    |
| PD6413       | BCL9  | cna | gain    | BASIS    |
| PD7067       | BCL9  | cna | amp     | BASIS    |
| PD7215       | BCL9  | cna | gain    | BASIS    |
| PD8621       | BCL9  | cna | amp     | BASIS    |
| PD9004       | BCL9  | cna | amp     | BASIS    |
| PD9702       | BCL9  | cna | gain    | BASIS    |
| TCGA-AN-A0XU | BUB1B | cna | hetloss | TCGA     |
| TCGA-AO-A0JL | BUB1B | cna | hetloss | TCGA     |
| TCGA-BH-A0C0 | BUB1B | cna | hetloss | TCGA     |
| TCGA-C8-A12L | BUB1B | cna | hetloss | TCGA     |
| TCGA-D8-A27M | BUB1B | cna | hetloss | TCGA     |
| TCGA-E2-A1L7 | BUB1B | cna | hetloss | TCGA     |
| TCGA-E9-A1NC | BUB1B | cna | hetloss | TCGA     |
| TCGA-LL-A5YP | BUB1B | cna | hetloss | TCGA     |
| MB-2827      | BUB1B | cna | hetloss | METABRIC |
| MB-5070      | BUB1B | cna | hetloss | METABRIC |
| MB-5465      | BUB1B | cna | hetloss | METABRIC |
| MB-6060      | BUB1B | cna | hetloss | METABRIC |
| MB-6098      | BUB1B | cna | hetloss | METABRIC |
| MB-7038      | BUB1B | cna | hetloss | METABRIC |
| MB-0420      | BUB1B | cna | hetloss | METABRIC |
| PD10014      | BUB1B | cna | hetloss | BASIS    |
| PD11327      | BUB1B | cna | homdel  | BASIS    |
| PD11742      | BUB1B | cna | hetloss | BASIS    |
| PD13297      | BUB1B | cna | hetloss | BASIS    |
| PD13299      | BUB1B | cna | hetloss | BASIS    |
| PD22355      | BUB1B | cna | hetloss | BASIS    |
| PD23574      | BUB1B | cna | hetloss | BASIS    |
| PD23578      | BUB1B | cna | hetloss | BASIS    |
| PD24202      | BUB1B | cna | hetloss | BASIS    |
| PD24206      | BUB1B | cna | gain    | BASIS    |
| PD24337      | BUB1B | cna | hetloss | BASIS    |
| PD3890       | BUB1B | cna | hetloss | BASIS    |
| PD3905       | BUB1B | cna | gain    | BASIS    |
| PD4005       | BUB1B | cna | homdel  | BASIS    |
| PD4967       | BUB1B | cna | hetloss | BASIS    |
| PD5930       | BUB1B | cna | hetloss | BASIS    |
| PD5945       | BUB1B | cna | amp     | BASIS    |

|              |       |     |         |          |
|--------------|-------|-----|---------|----------|
| PD5948       | BUB1B | cna | hetloss | BASIS    |
| PD6413       | BUB1B | cna | hetloss | BASIS    |
| PD7067       | BUB1B | cna | gain    | BASIS    |
| PD7215       | BUB1B | cna | gain    | BASIS    |
| PD8980       | BUB1B | cna | hetloss | BASIS    |
| PD9004       | BUB1B | cna | hetloss | BASIS    |
| PD9585       | BUB1B | cna | hetloss | BASIS    |
| PD9702       | BUB1B | cna | gain    | BASIS    |
| TCGA-AO-A0JL | CDX2  | cna | hetloss | TCGA     |
| TCGA-BH-A0AW | CDX2  | cna | hetloss | TCGA     |
| TCGA-BH-A0C0 | CDX2  | cna | gain    | TCGA     |
| TCGA-BH-A1FU | CDX2  | cna | hetloss | TCGA     |
| TCGA-C8-A12L | CDX2  | cna | hetloss | TCGA     |
| TCGA-D8-A27M | CDX2  | cna | gain    | TCGA     |
| TCGA-E9-A1NC | CDX2  | cna | hetloss | TCGA     |
| TCGA-EW-A10X | CDX2  | cna | homdel  | TCGA     |
| TCGA-LL-A5YP | CDX2  | cna | hetloss | TCGA     |
| MB-0346      | CDX2  | cna | amp     | METABRIC |
| MB-2827      | CDX2  | cna | hetloss | METABRIC |
| MB-6098      | CDX2  | cna | hetloss | METABRIC |
| MB-7032      | CDX2  | cna | gain    | METABRIC |
| MB-0420      | CDX2  | cna | hetloss | METABRIC |
| PD10014      | CDX2  | cna | hetloss | BASIS    |
| PD11327      | CDX2  | cna | hetloss | BASIS    |
| PD13296      | CDX2  | cna | hetloss | BASIS    |
| PD13297      | CDX2  | cna | hetloss | BASIS    |
| PD13771      | CDX2  | cna | hetloss | BASIS    |
| PD14442      | CDX2  | cna | hetloss | BASIS    |
| PD22355      | CDX2  | cna | hetloss | BASIS    |
| PD23562      | CDX2  | cna | gain    | BASIS    |
| PD23578      | CDX2  | cna | hetloss | BASIS    |
| PD24202      | CDX2  | cna | hetloss | BASIS    |
| PD24206      | CDX2  | cna | gain    | BASIS    |
| PD24337      | CDX2  | cna | hetloss | BASIS    |
| PD3890       | CDX2  | cna | hetloss | BASIS    |
| PD3905       | CDX2  | cna | gain    | BASIS    |
| PD4005       | CDX2  | cna | homdel  | BASIS    |
| PD4006       | CDX2  | cna | gain    | BASIS    |
| PD4107       | CDX2  | cna | gain    | BASIS    |
| PD4826       | CDX2  | cna | hetloss | BASIS    |
| PD4967       | CDX2  | cna | hetloss | BASIS    |
| PD5945       | CDX2  | cna | amp     | BASIS    |
| PD6406       | CDX2  | cna | hetloss | BASIS    |
| PD6413       | CDX2  | cna | hetloss | BASIS    |
| PD6731       | CDX2  | cna | hetloss | BASIS    |
| PD7067       | CDX2  | cna | gain    | BASIS    |
| PD8980       | CDX2  | cna | hetloss | BASIS    |

|              |       |     |         |          |
|--------------|-------|-----|---------|----------|
| PD9702       | CDX2  | cna | gain    | BASIS    |
| TCGA-A2-A25B | CHUK  | cna | hetloss | TCGA     |
| TCGA-AN-A0XU | CHUK  | cna | hetloss | TCGA     |
| TCGA-AO-A0JL | CHUK  | cna | hetloss | TCGA     |
| TCGA-BH-A18R | CHUK  | cna | gain    | TCGA     |
| TCGA-C8-A12L | CHUK  | cna | hetloss | TCGA     |
| TCGA-D8-A27M | CHUK  | cna | hetloss | TCGA     |
| TCGA-E2-A1L7 | CHUK  | cna | hetloss | TCGA     |
| MB-0346      | CHUK  | cna | gain    | METABRIC |
| MB-2827      | CHUK  | cna | hetloss | METABRIC |
| MB-5070      | CHUK  | cna | hetloss | METABRIC |
| MB-6060      | CHUK  | cna | hetloss | METABRIC |
| MB-6098      | CHUK  | cna | hetloss | METABRIC |
| MB-7038      | CHUK  | cna | hetloss | METABRIC |
| MB-7048      | CHUK  | cna | hetloss | METABRIC |
| MB-0420      | CHUK  | cna | hetloss | METABRIC |
| PD10014      | CHUK  | cna | hetloss | BASIS    |
| PD11327      | CHUK  | cna | homdel  | BASIS    |
| PD11742      | CHUK  | cna | hetloss | BASIS    |
| PD22355      | CHUK  | cna | hetloss | BASIS    |
| PD23562      | CHUK  | cna | gain    | BASIS    |
| PD23574      | CHUK  | cna | gain    | BASIS    |
| PD23578      | CHUK  | cna | hetloss | BASIS    |
| PD24202      | CHUK  | cna | hetloss | BASIS    |
| PD24206      | CHUK  | cna | hetloss | BASIS    |
| PD3890       | CHUK  | cna | hetloss | BASIS    |
| PD3905       | CHUK  | cna | gain    | BASIS    |
| PD4006       | CHUK  | cna | gain    | BASIS    |
| PD4107       | CHUK  | cna | gain    | BASIS    |
| PD5935       | CHUK  | cna | hetloss | BASIS    |
| PD5945       | CHUK  | cna | gain    | BASIS    |
| PD5948       | CHUK  | cna | gain    | BASIS    |
| PD6406       | CHUK  | cna | hetloss | BASIS    |
| PD6731       | CHUK  | cna | hetloss | BASIS    |
| PD7067       | CHUK  | cna | gain    | BASIS    |
| PD7215       | CHUK  | cna | gain    | BASIS    |
| PD8621       | CHUK  | cna | gain    | BASIS    |
| PD8980       | CHUK  | cna | hetloss | BASIS    |
| PD9004       | CHUK  | cna | gain    | BASIS    |
| PD9585       | CHUK  | cna | hetloss | BASIS    |
| PD9702       | CHUK  | cna | gain    | BASIS    |
| TCGA-A2-A25B | CNTRL | cna | gain    | TCGA     |
| TCGA-AN-A0XU | CNTRL | cna | hetloss | TCGA     |
| TCGA-AO-A0JL | CNTRL | cna | hetloss | TCGA     |
| TCGA-BH-A0C0 | CNTRL | cna | gain    | TCGA     |
| TCGA-C8-A12L | CNTRL | cna | hetloss | TCGA     |
| TCGA-E2-A1L7 | CNTRL | cna | gain    | TCGA     |

|              |        |     |         |          |
|--------------|--------|-----|---------|----------|
| TCGA-E9-A1NC | CNTRL  | cna | hetloss | TCGA     |
| TCGA-LL-A5YP | CNTRL  | cna | hetloss | TCGA     |
| MB-0346      | CNTRL  | cna | hetloss | METABRIC |
| MB-2827      | CNTRL  | cna | hetloss | METABRIC |
| MB-5070      | CNTRL  | cna | hetloss | METABRIC |
| MB-5107      | CNTRL  | cna | hetloss | METABRIC |
| MB-6098      | CNTRL  | cna | hetloss | METABRIC |
| MB-7038      | CNTRL  | cna | hetloss | METABRIC |
| MB-0420      | CNTRL  | cna | hetloss | METABRIC |
| PD10014      | CNTRL  | cna | gain    | BASIS    |
| PD11327      | CNTRL  | cna | hetloss | BASIS    |
| PD13297      | CNTRL  | cna | hetloss | BASIS    |
| PD13299      | CNTRL  | cna | gain    | BASIS    |
| PD23562      | CNTRL  | cna | gain    | BASIS    |
| PD23578      | CNTRL  | cna | hetloss | BASIS    |
| PD24186      | CNTRL  | cna | amp     | BASIS    |
| PD24202      | CNTRL  | cna | hetloss | BASIS    |
| PD24206      | CNTRL  | cna | gain    | BASIS    |
| PD24337      | CNTRL  | cna | hetloss | BASIS    |
| PD3890       | CNTRL  | cna | hetloss | BASIS    |
| PD3905       | CNTRL  | cna | gain    | BASIS    |
| PD4005       | CNTRL  | cna | hetloss | BASIS    |
| PD4006       | CNTRL  | cna | gain    | BASIS    |
| PD4107       | CNTRL  | cna | hetloss | BASIS    |
| PD5930       | CNTRL  | cna | gain    | BASIS    |
| PD5945       | CNTRL  | cna | gain    | BASIS    |
| PD6406       | CNTRL  | cna | hetloss | BASIS    |
| PD6731       | CNTRL  | cna | hetloss | BASIS    |
| PD7067       | CNTRL  | cna | gain    | BASIS    |
| PD7215       | CNTRL  | cna | gain    | BASIS    |
| PD8621       | CNTRL  | cna | gain    | BASIS    |
| PD8980       | CNTRL  | cna | gain    | BASIS    |
| PD9004       | CNTRL  | cna | hetloss | BASIS    |
| PD9585       | CNTRL  | cna | hetloss | BASIS    |
| TCGA-AN-A0XU | CREBBP | cna | gain    | TCGA     |
| TCGA-AO-A0JL | CREBBP | cna | gain    | TCGA     |
| TCGA-BH-A0AW | CREBBP | cna | gain    | TCGA     |
| TCGA-BH-A0C0 | CREBBP | cna | gain    | TCGA     |
| TCGA-C8-A12L | CREBBP | cna | gain    | TCGA     |
| TCGA-E2-A1L7 | CREBBP | cna | hetloss | TCGA     |
| TCGA-E9-A1NC | CREBBP | cna | hetloss | TCGA     |
| TCGA-LL-A5YP | CREBBP | cna | hetloss | TCGA     |
| MB-0346      | CREBBP | cna | hetloss | METABRIC |
| MB-5465      | CREBBP | cna | hetloss | METABRIC |
| MB-6098      | CREBBP | cna | hetloss | METABRIC |
| MB-6271      | CREBBP | cna | gain    | METABRIC |
| MB-7032      | CREBBP | cna | gain    | METABRIC |

|              |        |     |         |          |
|--------------|--------|-----|---------|----------|
| MB-7038      | CREBBP | cna | hetloss | METABRIC |
| MB-0420      | CREBBP | cna | hetloss | METABRIC |
| PD10014      | CREBBP | cna | hetloss | BASIS    |
| PD11327      | CREBBP | cna | hetloss | BASIS    |
| PD11742      | CREBBP | cna | gain    | BASIS    |
| PD13296      | CREBBP | cna | gain    | BASIS    |
| PD13297      | CREBBP | cna | hetloss | BASIS    |
| PD13299      | CREBBP | cna | gain    | BASIS    |
| PD22355      | CREBBP | cna | hetloss | BASIS    |
| PD23562      | CREBBP | cna | hetloss | BASIS    |
| PD23578      | CREBBP | cna | hetloss | BASIS    |
| PD24202      | CREBBP | cna | hetloss | BASIS    |
| PD24337      | CREBBP | cna | hetloss | BASIS    |
| PD3905       | CREBBP | cna | gain    | BASIS    |
| PD4005       | CREBBP | cna | gain    | BASIS    |
| PD4006       | CREBBP | cna | gain    | BASIS    |
| PD4107       | CREBBP | cna | gain    | BASIS    |
| PD4826       | CREBBP | cna | gain    | BASIS    |
| PD5930       | CREBBP | cna | gain    | BASIS    |
| PD5935       | CREBBP | cna | gain    | BASIS    |
| PD5945       | CREBBP | cna | amp     | BASIS    |
| PD5948       | CREBBP | cna | gain    | BASIS    |
| PD7067       | CREBBP | cna | gain    | BASIS    |
| PD7215       | CREBBP | cna | amp     | BASIS    |
| PD9004       | CREBBP | cna | gain    | BASIS    |
| PD9585       | CREBBP | cna | hetloss | BASIS    |
| PD9702       | CREBBP | cna | gain    | BASIS    |
| TCGA-AN-A0XU | CTNNA1 | cna | hetloss | TCGA     |
| TCGA-AO-A0JL | CTNNA1 | cna | hetloss | TCGA     |
| TCGA-BH-A0C0 | CTNNA1 | cna | hetloss | TCGA     |
| TCGA-BH-A1FU | CTNNA1 | cna | hetloss | TCGA     |
| TCGA-C8-A12L | CTNNA1 | cna | hetloss | TCGA     |
| TCGA-D8-A27M | CTNNA1 | cna | hetloss | TCGA     |
| TCGA-E2-A1L7 | CTNNA1 | cna | hetloss | TCGA     |
| TCGA-E9-A1NC | CTNNA1 | cna | hetloss | TCGA     |
| TCGA-LL-A5YP | CTNNA1 | cna | hetloss | TCGA     |
| MB-0346      | CTNNA1 | cna | gain    | METABRIC |
| MB-2827      | CTNNA1 | cna | hetloss | METABRIC |
| MB-5070      | CTNNA1 | cna | hetloss | METABRIC |
| MB-5465      | CTNNA1 | cna | hetloss | METABRIC |
| MB-6098      | CTNNA1 | cna | hetloss | METABRIC |
| MB-7038      | CTNNA1 | cna | hetloss | METABRIC |
| MB-0420      | CTNNA1 | cna | hetloss | METABRIC |
| PD10014      | CTNNA1 | cna | hetloss | BASIS    |
| PD11327      | CTNNA1 | cna | hetloss | BASIS    |
| PD13296      | CTNNA1 | cna | hetloss | BASIS    |
| PD13297      | CTNNA1 | cna | hetloss | BASIS    |



|              |         |     |         |          |
|--------------|---------|-----|---------|----------|
| PD13771      | CTNNA1  | cna | gain    | BASIS    |
| PD22355      | CTNNA1  | cna | hetloss | BASIS    |
| PD23562      | CTNNA1  | cna | gain    | BASIS    |
| PD23574      | CTNNA1  | cna | gain    | BASIS    |
| PD23578      | CTNNA1  | cna | hetloss | BASIS    |
| PD24186      | CTNNA1  | cna | gain    | BASIS    |
| PD24202      | CTNNA1  | cna | hetloss | BASIS    |
| PD24206      | CTNNA1  | cna | gain    | BASIS    |
| PD24337      | CTNNA1  | cna | hetloss | BASIS    |
| PD3890       | CTNNA1  | cna | hetloss | BASIS    |
| PD3905       | CTNNA1  | cna | gain    | BASIS    |
| PD4005       | CTNNA1  | cna | hetloss | BASIS    |
| PD4826       | CTNNA1  | cna | gain    | BASIS    |
| PD5935       | CTNNA1  | cna | gain    | BASIS    |
| PD5945       | CTNNA1  | cna | gain    | BASIS    |
| PD6406       | CTNNA1  | cna | hetloss | BASIS    |
| PD6413       | CTNNA1  | cna | hetloss | BASIS    |
| PD7067       | CTNNA1  | cna | gain    | BASIS    |
| PD8980       | CTNNA1  | cna | hetloss | BASIS    |
| PD9585       | CTNNA1  | cna | hetloss | BASIS    |
| TCGA-A2-A25B | CYP17A1 | cna | hetloss | TCGA     |
| TCGA-AN-A0XU | CYP17A1 | cna | hetloss | TCGA     |
| TCGA-AO-A0JL | CYP17A1 | cna | hetloss | TCGA     |
| TCGA-BH-A18R | CYP17A1 | cna | gain    | TCGA     |
| TCGA-C8-A12L | CYP17A1 | cna | hetloss | TCGA     |
| TCGA-D8-A27M | CYP17A1 | cna | hetloss | TCGA     |
| TCGA-E2-A1L7 | CYP17A1 | cna | hetloss | TCGA     |
| TCGA-LL-A5YP | CYP17A1 | cna | gain    | TCGA     |
| MB-0346      | CYP17A1 | cna | gain    | METABRIC |
| MB-2827      | CYP17A1 | cna | hetloss | METABRIC |
| MB-5070      | CYP17A1 | cna | hetloss | METABRIC |
| MB-6060      | CYP17A1 | cna | hetloss | METABRIC |
| MB-6098      | CYP17A1 | cna | hetloss | METABRIC |
| MB-7038      | CYP17A1 | cna | hetloss | METABRIC |
| MB-7048      | CYP17A1 | cna | hetloss | METABRIC |
| MB-0420      | CYP17A1 | cna | hetloss | METABRIC |
| PD10014      | CYP17A1 | cna | hetloss | BASIS    |
| PD11327      | CYP17A1 | cna | homdel  | BASIS    |
| PD11742      | CYP17A1 | cna | hetloss | BASIS    |
| PD22355      | CYP17A1 | cna | hetloss | BASIS    |
| PD23562      | CYP17A1 | cna | gain    | BASIS    |
| PD23574      | CYP17A1 | cna | gain    | BASIS    |
| PD23578      | CYP17A1 | cna | hetloss | BASIS    |
| PD24206      | CYP17A1 | cna | homdel  | BASIS    |
| PD3890       | CYP17A1 | cna | hetloss | BASIS    |
| PD3905       | CYP17A1 | cna | gain    | BASIS    |
| PD4005       | CYP17A1 | cna | hetloss | BASIS    |

|              |         |     |         |          |
|--------------|---------|-----|---------|----------|
| PD4006       | CYP17A1 | cna | gain    | BASIS    |
| PD4107       | CYP17A1 | cna | gain    | BASIS    |
| PD5935       | CYP17A1 | cna | hetloss | BASIS    |
| PD5945       | CYP17A1 | cna | gain    | BASIS    |
| PD5948       | CYP17A1 | cna | gain    | BASIS    |
| PD6406       | CYP17A1 | cna | hetloss | BASIS    |
| PD6731       | CYP17A1 | cna | hetloss | BASIS    |
| PD7067       | CYP17A1 | cna | gain    | BASIS    |
| PD7215       | CYP17A1 | cna | gain    | BASIS    |
| PD8621       | CYP17A1 | cna | gain    | BASIS    |
| PD8980       | CYP17A1 | cna | hetloss | BASIS    |
| PD9585       | CYP17A1 | cna | hetloss | BASIS    |
| PD9702       | CYP17A1 | cna | gain    | BASIS    |
| TCGA-A2-A25B | DICER1  | cna | hetloss | TCGA     |
| TCGA-AN-A0XU | DICER1  | cna | gain    | TCGA     |
| TCGA-AO-A0JL | DICER1  | cna | hetloss | TCGA     |
| TCGA-BH-A0AW | DICER1  | cna | hetloss | TCGA     |
| TCGA-BH-A1FU | DICER1  | cna | gain    | TCGA     |
| TCGA-C8-A12L | DICER1  | cna | gain    | TCGA     |
| TCGA-D8-A27M | DICER1  | cna | hetloss | TCGA     |
| TCGA-E2-A1L7 | DICER1  | cna | gain    | TCGA     |
| TCGA-E9-A1NC | DICER1  | cna | hetloss | TCGA     |
| TCGA-LL-A5YP | DICER1  | cna | hetloss | TCGA     |
| MB-0346      | DICER1  | cna | gain    | METABRIC |
| MB-2827      | DICER1  | cna | hetloss | METABRIC |
| MB-5070      | DICER1  | cna | hetloss | METABRIC |
| MB-5107      | DICER1  | cna | hetloss | METABRIC |
| MB-6098      | DICER1  | cna | hetloss | METABRIC |
| MTS-T0064    | DICER1  | cna | hetloss | METABRIC |
| PD10014      | DICER1  | cna | hetloss | BASIS    |
| PD11327      | DICER1  | cna | gain    | BASIS    |
| PD11742      | DICER1  | cna | hetloss | BASIS    |
| PD13296      | DICER1  | cna | gain    | BASIS    |
| PD13297      | DICER1  | cna | hetloss | BASIS    |
| PD13771      | DICER1  | cna | hetloss | BASIS    |
| PD23562      | DICER1  | cna | gain    | BASIS    |
| PD23574      | DICER1  | cna | gain    | BASIS    |
| PD23578      | DICER1  | cna | hetloss | BASIS    |
| PD24202      | DICER1  | cna | hetloss | BASIS    |
| PD24206      | DICER1  | cna | gain    | BASIS    |
| PD24337      | DICER1  | cna | hetloss | BASIS    |
| PD3890       | DICER1  | cna | hetloss | BASIS    |
| PD3905       | DICER1  | cna | gain    | BASIS    |
| PD4005       | DICER1  | cna | hetloss | BASIS    |
| PD4006       | DICER1  | cna | gain    | BASIS    |
| PD4826       | DICER1  | cna | gain    | BASIS    |
| PD5945       | DICER1  | cna | gain    | BASIS    |

|              |        |     |         |          |
|--------------|--------|-----|---------|----------|
| PD5948       | DICER1 | cna | gain    | BASIS    |
| PD6406       | DICER1 | cna | hetloss | BASIS    |
| PD6413       | DICER1 | cna | hetloss | BASIS    |
| PD7067       | DICER1 | cna | gain    | BASIS    |
| PD8980       | DICER1 | cna | hetloss | BASIS    |
| PD9702       | DICER1 | cna | gain    | BASIS    |
| TCGA-A2-A25B | DIS3   | cna | hetloss | TCGA     |
| TCGA-AN-A0XU | DIS3   | cna | hetloss | TCGA     |
| TCGA-AO-A0JL | DIS3   | cna | hetloss | TCGA     |
| TCGA-BH-A0AW | DIS3   | cna | hetloss | TCGA     |
| TCGA-BH-A0C0 | DIS3   | cna | hetloss | TCGA     |
| TCGA-BH-A1FU | DIS3   | cna | hetloss | TCGA     |
| TCGA-C8-A12L | DIS3   | cna | gain    | TCGA     |
| TCGA-EW-A10X | DIS3   | cna | homdel  | TCGA     |
| TCGA-LL-A5YP | DIS3   | cna | hetloss | TCGA     |
| MB-0346      | DIS3   | cna | hetloss | METABRIC |
| MB-5107      | DIS3   | cna | hetloss | METABRIC |
| MB-6060      | DIS3   | cna | hetloss | METABRIC |
| MB-6098      | DIS3   | cna | gain    | METABRIC |
| MB-7038      | DIS3   | cna | hetloss | METABRIC |
| MB-7048      | DIS3   | cna | hetloss | METABRIC |
| MB-0420      | DIS3   | cna | gain    | METABRIC |
| PD10014      | DIS3   | cna | hetloss | BASIS    |
| PD11327      | DIS3   | cna | homdel  | BASIS    |
| PD13299      | DIS3   | cna | gain    | BASIS    |
| PD13771      | DIS3   | cna | hetloss | BASIS    |
| PD14442      | DIS3   | cna | hetloss | BASIS    |
| PD23562      | DIS3   | cna | gain    | BASIS    |
| PD23574      | DIS3   | cna | hetloss | BASIS    |
| PD23578      | DIS3   | cna | gain    | BASIS    |
| PD24202      | DIS3   | cna | hetloss | BASIS    |
| PD24206      | DIS3   | cna | hetloss | BASIS    |
| PD24337      | DIS3   | cna | hetloss | BASIS    |
| PD3905       | DIS3   | cna | gain    | BASIS    |
| PD4005       | DIS3   | cna | hetloss | BASIS    |
| PD4006       | DIS3   | cna | hetloss | BASIS    |
| PD4967       | DIS3   | cna | hetloss | BASIS    |
| PD5945       | DIS3   | cna | gain    | BASIS    |
| PD5948       | DIS3   | cna | gain    | BASIS    |
| PD6406       | DIS3   | cna | hetloss | BASIS    |
| PD6731       | DIS3   | cna | hetloss | BASIS    |
| PD7215       | DIS3   | cna | gain    | BASIS    |
| PD8621       | DIS3   | cna | hetloss | BASIS    |
| PD8980       | DIS3   | cna | hetloss | BASIS    |
| PD9585       | DIS3   | cna | hetloss | BASIS    |
| PD9702       | DIS3   | cna | gain    | BASIS    |
| TCGA-A2-A25B | DKK2   | cna | hetloss | TCGA     |

|              |      |     |         |          |
|--------------|------|-----|---------|----------|
| TCGA-AN-A0XU | DKK2 | cna | hetloss | TCGA     |
| TCGA-BH-A0AW | DKK2 | cna | hetloss | TCGA     |
| TCGA-BH-A0C0 | DKK2 | cna | hetloss | TCGA     |
| TCGA-BH-A1FU | DKK2 | cna | gain    | TCGA     |
| TCGA-C8-A12L | DKK2 | cna | hetloss | TCGA     |
| TCGA-D8-A27M | DKK2 | cna | hetloss | TCGA     |
| TCGA-E2-A1L7 | DKK2 | cna | hetloss | TCGA     |
| TCGA-E9-A1NC | DKK2 | cna | hetloss | TCGA     |
| TCGA-LL-A5YP | DKK2 | cna | gain    | TCGA     |
| MB-2827      | DKK2 | cna | hetloss | METABRIC |
| MB-5070      | DKK2 | cna | hetloss | METABRIC |
| MB-5465      | DKK2 | cna | hetloss | METABRIC |
| MB-7048      | DKK2 | cna | hetloss | METABRIC |
| MB-0420      | DKK2 | cna | hetloss | METABRIC |
| PD10014      | DKK2 | cna | gain    | BASIS    |
| PD11742      | DKK2 | cna | hetloss | BASIS    |
| PD13296      | DKK2 | cna | hetloss | BASIS    |
| PD13297      | DKK2 | cna | hetloss | BASIS    |
| PD22355      | DKK2 | cna | hetloss | BASIS    |
| PD23562      | DKK2 | cna | gain    | BASIS    |
| PD23578      | DKK2 | cna | hetloss | BASIS    |
| PD24202      | DKK2 | cna | hetloss | BASIS    |
| PD24206      | DKK2 | cna | gain    | BASIS    |
| PD24337      | DKK2 | cna | hetloss | BASIS    |
| PD3890       | DKK2 | cna | gain    | BASIS    |
| PD3905       | DKK2 | cna | gain    | BASIS    |
| PD4006       | DKK2 | cna | hetloss | BASIS    |
| PD4107       | DKK2 | cna | gain    | BASIS    |
| PD4826       | DKK2 | cna | gain    | BASIS    |
| PD5930       | DKK2 | cna | hetloss | BASIS    |
| PD5935       | DKK2 | cna | gain    | BASIS    |
| PD5945       | DKK2 | cna | gain    | BASIS    |
| PD5948       | DKK2 | cna | gain    | BASIS    |
| PD6406       | DKK2 | cna | hetloss | BASIS    |
| PD7067       | DKK2 | cna | gain    | BASIS    |
| PD7215       | DKK2 | cna | gain    | BASIS    |
| PD8621       | DKK2 | cna | hetloss | BASIS    |
| PD8980       | DKK2 | cna | hetloss | BASIS    |
| PD9585       | DKK2 | cna | hetloss | BASIS    |
| TCGA-AN-A0XU | EBF1 | cna | hetloss | TCGA     |
| TCGA-AO-A0JL | EBF1 | cna | gain    | TCGA     |
| TCGA-BH-A0C0 | EBF1 | cna | hetloss | TCGA     |
| TCGA-BH-A1FU | EBF1 | cna | hetloss | TCGA     |
| TCGA-C8-A12L | EBF1 | cna | hetloss | TCGA     |
| TCGA-D8-A27M | EBF1 | cna | hetloss | TCGA     |
| TCGA-E2-A1L7 | EBF1 | cna | hetloss | TCGA     |
| TCGA-E9-A1NC | EBF1 | cna | hetloss | TCGA     |

|              |       |     |         |          |
|--------------|-------|-----|---------|----------|
| TCGA-LL-A5YP | EBF1  | cna | hetloss | TCGA     |
| MB-0346      | EBF1  | cna | gain    | METABRIC |
| MB-5070      | EBF1  | cna | hetloss | METABRIC |
| MB-5465      | EBF1  | cna | hetloss | METABRIC |
| MB-6098      | EBF1  | cna | hetloss | METABRIC |
| MB-7038      | EBF1  | cna | hetloss | METABRIC |
| MB-0420      | EBF1  | cna | hetloss | METABRIC |
| PD10014      | EBF1  | cna | hetloss | BASIS    |
| PD11327      | EBF1  | cna | gain    | BASIS    |
| PD13296      | EBF1  | cna | hetloss | BASIS    |
| PD13297      | EBF1  | cna | hetloss | BASIS    |
| PD13771      | EBF1  | cna | gain    | BASIS    |
| PD22355      | EBF1  | cna | hetloss | BASIS    |
| PD23578      | EBF1  | cna | hetloss | BASIS    |
| PD24186      | EBF1  | cna | gain    | BASIS    |
| PD24202      | EBF1  | cna | hetloss | BASIS    |
| PD24206      | EBF1  | cna | gain    | BASIS    |
| PD24337      | EBF1  | cna | hetloss | BASIS    |
| PD3890       | EBF1  | cna | hetloss | BASIS    |
| PD3905       | EBF1  | cna | gain    | BASIS    |
| PD4005       | EBF1  | cna | hetloss | BASIS    |
| PD4006       | EBF1  | cna | hetloss | BASIS    |
| PD4107       | EBF1  | cna | hetloss | BASIS    |
| PD4826       | EBF1  | cna | gain    | BASIS    |
| PD5935       | EBF1  | cna | gain    | BASIS    |
| PD5945       | EBF1  | cna | gain    | BASIS    |
| PD5948       | EBF1  | cna | hetloss | BASIS    |
| PD6406       | EBF1  | cna | hetloss | BASIS    |
| PD6413       | EBF1  | cna | hetloss | BASIS    |
| PD8621       | EBF1  | cna | hetloss | BASIS    |
| PD8980       | EBF1  | cna | hetloss | BASIS    |
| PD9585       | EBF1  | cna | hetloss | BASIS    |
| TCGA-A2-A25B | ESCO2 | cna | hetloss | TCGA     |
| TCGA-AN-A0XU | ESCO2 | cna | hetloss | TCGA     |
| TCGA-AO-A0JL | ESCO2 | cna | hetloss | TCGA     |
| TCGA-BH-A0C0 | ESCO2 | cna | hetloss | TCGA     |
| TCGA-BH-A1FU | ESCO2 | cna | homdel  | TCGA     |
| TCGA-C8-A12L | ESCO2 | cna | hetloss | TCGA     |
| TCGA-D8-A27M | ESCO2 | cna | hetloss | TCGA     |
| TCGA-E2-A1L7 | ESCO2 | cna | hetloss | TCGA     |
| TCGA-LL-A5YP | ESCO2 | cna | hetloss | TCGA     |
| MB-0346      | ESCO2 | cna | hetloss | METABRIC |
| MB-2827      | ESCO2 | cna | hetloss | METABRIC |
| MB-5070      | ESCO2 | cna | hetloss | METABRIC |
| MB-5465      | ESCO2 | cna | hetloss | METABRIC |
| MB-6060      | ESCO2 | cna | hetloss | METABRIC |
| MB-7038      | ESCO2 | cna | hetloss | METABRIC |

|                   |       |     |         |            |
|-------------------|-------|-----|---------|------------|
| MB-0420           | ESCO2 | cna | hetloss | METABRIC   |
| PD10014           | ESCO2 | cna | hetloss | BASIS      |
| PD11327           | ESCO2 | cna | hetloss | BASIS      |
| PD13296           | ESCO2 | cna | hetloss | BASIS      |
| PD13299           | ESCO2 | cna | hetloss | BASIS      |
| PD13771           | ESCO2 | cna | hetloss | BASIS      |
| PD14442           | ESCO2 | cna | hetloss | BASIS      |
| PD22355           | ESCO2 | cna | hetloss | BASIS      |
| PD23562           | ESCO2 | cna | hetloss | BASIS      |
| PD23574           | ESCO2 | cna | hetloss | BASIS      |
| PD23578           | ESCO2 | cna | hetloss | BASIS      |
| PD24186           | ESCO2 | cna | gain    | BASIS      |
| PD24202           | ESCO2 | cna | hetloss | BASIS      |
| PD24206           | ESCO2 | cna | gain    | BASIS      |
| PD24337           | ESCO2 | cna | hetloss | BASIS      |
| PD3905            | ESCO2 | cna | gain    | BASIS      |
| PD4005            | ESCO2 | cna | hetloss | BASIS      |
| PD4006            | ESCO2 | cna | gain    | BASIS      |
| PD4826            | ESCO2 | cna | hetloss | BASIS      |
| PD5935            | ESCO2 | cna | gain    | BASIS      |
| PD5945            | ESCO2 | cna | gain    | BASIS      |
| PD6406            | ESCO2 | cna | hetloss | BASIS      |
| PD6413            | ESCO2 | cna | hetloss | BASIS      |
| PD7067            | ESCO2 | cna | hetloss | BASIS      |
| PD9004            | ESCO2 | cna | hetloss | BASIS      |
| TCGA-A2-A25B      | EZH2  | cna | gain    | TCGA       |
| TCGA-AO-A0JL      | EZH2  | cna | gain    | TCGA       |
| TCGA-C8-A12L      | EZH2  | cna | hetloss | TCGA       |
| TCGA-D8-A27M      | EZH2  | cna | gain    | TCGA       |
| TCGA-E2-A1L7      | EZH2  | cna | hetloss | TCGA       |
| TCGA-E9-A1NC      | EZH2  | cna | hetloss | TCGA       |
| TCGA-LL-A5YP      | EZH2  | cna | hetloss | TCGA       |
| MB-0346           | EZH2  | cna | hetloss | METABRIC   |
| MB-5070           | EZH2  | cna | hetloss | METABRIC   |
| MB-6098           | EZH2  | cna | gain    | METABRIC   |
| MB-7038           | EZH2  | cna | gain    | METABRIC   |
| MB-7048           | EZH2  | cna | gain    | METABRIC   |
| MB-0420           | EZH2  | cna | hetloss | METABRIC   |
| MTS-T0064         | EZH2  | cna | amp     | METABRIC   |
| P-0009557-T01-IM5 | EZH2  | cna | homdel  | MSK-IMPACT |
| PD10014           | EZH2  | cna | gain    | BASIS      |
| PD13296           | EZH2  | cna | hetloss | BASIS      |
| PD13297           | EZH2  | cna | gain    | BASIS      |
| PD22355           | EZH2  | cna | hetloss | BASIS      |
| PD23562           | EZH2  | cna | gain    | BASIS      |
| PD23574           | EZH2  | cna | gain    | BASIS      |
| PD23578           | EZH2  | cna | hetloss | BASIS      |

|              |      |     |         |          |
|--------------|------|-----|---------|----------|
| PD24186      | EZH2 | cna | gain    | BASIS    |
| PD24202      | EZH2 | cna | gain    | BASIS    |
| PD24337      | EZH2 | cna | gain    | BASIS    |
| PD3890       | EZH2 | cna | hetloss | BASIS    |
| PD3905       | EZH2 | cna | gain    | BASIS    |
| PD4006       | EZH2 | cna | amp     | BASIS    |
| PD4107       | EZH2 | cna | gain    | BASIS    |
| PD5930       | EZH2 | cna | gain    | BASIS    |
| PD5945       | EZH2 | cna | amp     | BASIS    |
| PD5948       | EZH2 | cna | gain    | BASIS    |
| PD6406       | EZH2 | cna | gain    | BASIS    |
| PD6731       | EZH2 | cna | hetloss | BASIS    |
| PD7067       | EZH2 | cna | gain    | BASIS    |
| PD7215       | EZH2 | cna | gain    | BASIS    |
| PD8621       | EZH2 | cna | gain    | BASIS    |
| PD9004       | EZH2 | cna | gain    | BASIS    |
| PD9585       | EZH2 | cna | hetloss | BASIS    |
| PD9702       | EZH2 | cna | gain    | BASIS    |
| TCGA-A2-A25B | EZR  | cna | hetloss | TCGA     |
| TCGA-AN-A0XU | EZR  | cna | gain    | TCGA     |
| TCGA-AO-A0JL | EZR  | cna | hetloss | TCGA     |
| TCGA-BH-A0AW | EZR  | cna | amp     | TCGA     |
| TCGA-BH-A0C0 | EZR  | cna | hetloss | TCGA     |
| TCGA-C8-A12L | EZR  | cna | gain    | TCGA     |
| TCGA-D8-A27M | EZR  | cna | hetloss | TCGA     |
| TCGA-E9-A1NC | EZR  | cna | hetloss | TCGA     |
| MB-2827      | EZR  | cna | hetloss | METABRIC |
| MB-5070      | EZR  | cna | gain    | METABRIC |
| MB-5107      | EZR  | cna | hetloss | METABRIC |
| MB-6060      | EZR  | cna | hetloss | METABRIC |
| MB-6098      | EZR  | cna | hetloss | METABRIC |
| MB-7048      | EZR  | cna | hetloss | METABRIC |
| MB-0420      | EZR  | cna | hetloss | METABRIC |
| MTS-T0064    | EZR  | cna | hetloss | METABRIC |
| PD10014      | EZR  | cna | hetloss | BASIS    |
| PD13296      | EZR  | cna | homdel  | BASIS    |
| PD13297      | EZR  | cna | hetloss | BASIS    |
| PD13299      | EZR  | cna | gain    | BASIS    |
| PD23562      | EZR  | cna | gain    | BASIS    |
| PD23574      | EZR  | cna | gain    | BASIS    |
| PD24186      | EZR  | cna | gain    | BASIS    |
| PD3890       | EZR  | cna | hetloss | BASIS    |
| PD3905       | EZR  | cna | gain    | BASIS    |
| PD4005       | EZR  | cna | hetloss | BASIS    |
| PD4006       | EZR  | cna | gain    | BASIS    |
| PD4107       | EZR  | cna | gain    | BASIS    |
| PD4826       | EZR  | cna | gain    | BASIS    |

|              |      |     |         |          |
|--------------|------|-----|---------|----------|
| PD4967       | EZR  | cna | hetloss | BASIS    |
| PD5935       | EZR  | cna | gain    | BASIS    |
| PD5945       | EZR  | cna | gain    | BASIS    |
| PD6406       | EZR  | cna | hetloss | BASIS    |
| PD6413       | EZR  | cna | hetloss | BASIS    |
| PD6731       | EZR  | cna | hetloss | BASIS    |
| PD7067       | EZR  | cna | amp     | BASIS    |
| PD8980       | EZR  | cna | gain    | BASIS    |
| PD9004       | EZR  | cna | gain    | BASIS    |
| PD9585       | EZR  | cna | hetloss | BASIS    |
| PD9702       | EZR  | cna | gain    | BASIS    |
| TCGA-A2-A25B | FLCN | cna | hetloss | TCGA     |
| TCGA-AN-A0XU | FLCN | cna | hetloss | TCGA     |
| TCGA-AO-A0JL | FLCN | cna | gain    | TCGA     |
| TCGA-BH-A0AW | FLCN | cna | hetloss | TCGA     |
| TCGA-BH-A0C0 | FLCN | cna | hetloss | TCGA     |
| TCGA-C8-A12L | FLCN | cna | hetloss | TCGA     |
| TCGA-D8-A27M | FLCN | cna | hetloss | TCGA     |
| TCGA-E2-A1L7 | FLCN | cna | hetloss | TCGA     |
| TCGA-E9-A1NC | FLCN | cna | hetloss | TCGA     |
| TCGA-LL-A5YP | FLCN | cna | gain    | TCGA     |
| MB-0346      | FLCN | cna | hetloss | METABRIC |
| MB-2827      | FLCN | cna | hetloss | METABRIC |
| MB-5070      | FLCN | cna | hetloss | METABRIC |
| MB-5107      | FLCN | cna | hetloss | METABRIC |
| MB-5465      | FLCN | cna | hetloss | METABRIC |
| MB-6098      | FLCN | cna | hetloss | METABRIC |
| MB-6271      | FLCN | cna | hetloss | METABRIC |
| MB-7038      | FLCN | cna | hetloss | METABRIC |
| MB-7048      | FLCN | cna | hetloss | METABRIC |
| MB-0420      | FLCN | cna | hetloss | METABRIC |
| PD11327      | FLCN | cna | hetloss | BASIS    |
| PD11742      | FLCN | cna | hetloss | BASIS    |
| PD13297      | FLCN | cna | hetloss | BASIS    |
| PD13771      | FLCN | cna | hetloss | BASIS    |
| PD22355      | FLCN | cna | hetloss | BASIS    |
| PD23561      | FLCN | cna | hetloss | BASIS    |
| PD24202      | FLCN | cna | hetloss | BASIS    |
| PD24206      | FLCN | cna | hetloss | BASIS    |
| PD24337      | FLCN | cna | hetloss | BASIS    |
| PD3890       | FLCN | cna | hetloss | BASIS    |
| PD3905       | FLCN | cna | gain    | BASIS    |
| PD4005       | FLCN | cna | hetloss | BASIS    |
| PD4826       | FLCN | cna | hetloss | BASIS    |
| PD4967       | FLCN | cna | hetloss | BASIS    |
| PD5945       | FLCN | cna | gain    | BASIS    |
| PD6406       | FLCN | cna | hetloss | BASIS    |



|              |       |     |         |          |
|--------------|-------|-----|---------|----------|
| PD6413       | FLCN  | cna | hetloss | BASIS    |
| PD6731       | FLCN  | cna | hetloss | BASIS    |
| PD7067       | FLCN  | cna | gain    | BASIS    |
| PD9585       | FLCN  | cna | hetloss | BASIS    |
| TCGA-AN-A0XU | FOXL2 | cna | gain    | TCGA     |
| TCGA-BH-A0C0 | FOXL2 | cna | gain    | TCGA     |
| TCGA-BH-A18R | FOXL2 | cna | gain    | TCGA     |
| TCGA-BH-A1FU | FOXL2 | cna | hetloss | TCGA     |
| TCGA-C8-A12L | FOXL2 | cna | gain    | TCGA     |
| TCGA-E2-A1L7 | FOXL2 | cna | gain    | TCGA     |
| TCGA-E9-A1NC | FOXL2 | cna | gain    | TCGA     |
| TCGA-LL-A5YP | FOXL2 | cna | gain    | TCGA     |
| MB-0346      | FOXL2 | cna | hetloss | METABRIC |
| MB-5070      | FOXL2 | cna | gain    | METABRIC |
| MB-5107      | FOXL2 | cna | gain    | METABRIC |
| MB-5465      | FOXL2 | cna | gain    | METABRIC |
| MB-7038      | FOXL2 | cna | gain    | METABRIC |
| MB-7048      | FOXL2 | cna | hetloss | METABRIC |
| MTS-T0064    | FOXL2 | cna | amp     | METABRIC |
| PD10014      | FOXL2 | cna | gain    | BASIS    |
| PD11327      | FOXL2 | cna | gain    | BASIS    |
| PD13299      | FOXL2 | cna | gain    | BASIS    |
| PD13771      | FOXL2 | cna | hetloss | BASIS    |
| PD22355      | FOXL2 | cna | gain    | BASIS    |
| PD23561      | FOXL2 | cna | hetloss | BASIS    |
| PD23574      | FOXL2 | cna | gain    | BASIS    |
| PD23578      | FOXL2 | cna | gain    | BASIS    |
| PD24186      | FOXL2 | cna | gain    | BASIS    |
| PD24202      | FOXL2 | cna | gain    | BASIS    |
| PD24206      | FOXL2 | cna | gain    | BASIS    |
| PD3905       | FOXL2 | cna | gain    | BASIS    |
| PD4005       | FOXL2 | cna | hetloss | BASIS    |
| PD4107       | FOXL2 | cna | gain    | BASIS    |
| PD4826       | FOXL2 | cna | gain    | BASIS    |
| PD5935       | FOXL2 | cna | gain    | BASIS    |
| PD5945       | FOXL2 | cna | gain    | BASIS    |
| PD5948       | FOXL2 | cna | gain    | BASIS    |
| PD6731       | FOXL2 | cna | gain    | BASIS    |
| PD7067       | FOXL2 | cna | gain    | BASIS    |
| PD7215       | FOXL2 | cna | gain    | BASIS    |
| PD8621       | FOXL2 | cna | gain    | BASIS    |
| PD8980       | FOXL2 | cna | gain    | BASIS    |
| PD9004       | FOXL2 | cna | gain    | BASIS    |
| PD9702       | FOXL2 | cna | gain    | BASIS    |
| TCGA-A2-A25B | GATA3 | cna | gain    | TCGA     |
| TCGA-AN-A0XU | GATA3 | cna | amp     | TCGA     |
| TCGA-AO-A0JL | GATA3 | cna | gain    | TCGA     |

|              |       |     |         |          |
|--------------|-------|-----|---------|----------|
| TCGA-BH-A0AW | GATA3 | cna | gain    | TCGA     |
| TCGA-BH-A0C0 | GATA3 | cna | gain    | TCGA     |
| TCGA-C8-A12L | GATA3 | cna | gain    | TCGA     |
| MB-5070      | GATA3 | cna | gain    | METABRIC |
| MB-5465      | GATA3 | cna | amp     | METABRIC |
| MB-6098      | GATA3 | cna | amp     | METABRIC |
| MB-7038      | GATA3 | cna | hetloss | METABRIC |
| MTS-T0064    | GATA3 | cna | gain    | METABRIC |
| PD10014      | GATA3 | cna | amp     | BASIS    |
| PD11327      | GATA3 | cna | amp     | BASIS    |
| PD13296      | GATA3 | cna | gain    | BASIS    |
| PD13299      | GATA3 | cna | gain    | BASIS    |
| PD13771      | GATA3 | cna | gain    | BASIS    |
| PD22355      | GATA3 | cna | gain    | BASIS    |
| PD23562      | GATA3 | cna | amp     | BASIS    |
| PD23574      | GATA3 | cna | gain    | BASIS    |
| PD24186      | GATA3 | cna | amp     | BASIS    |
| PD24202      | GATA3 | cna | gain    | BASIS    |
| PD24337      | GATA3 | cna | gain    | BASIS    |
| PD3905       | GATA3 | cna | gain    | BASIS    |
| PD4005       | GATA3 | cna | gain    | BASIS    |
| PD4006       | GATA3 | cna | amp     | BASIS    |
| PD4107       | GATA3 | cna | gain    | BASIS    |
| PD4826       | GATA3 | cna | gain    | BASIS    |
| PD5930       | GATA3 | cna | gain    | BASIS    |
| PD5935       | GATA3 | cna | gain    | BASIS    |
| PD5945       | GATA3 | cna | amp     | BASIS    |
| PD5948       | GATA3 | cna | gain    | BASIS    |
| PD6406       | GATA3 | cna | hetloss | BASIS    |
| PD6413       | GATA3 | cna | gain    | BASIS    |
| PD6731       | GATA3 | cna | hetloss | BASIS    |
| PD7067       | GATA3 | cna | amp     | BASIS    |
| PD7215       | GATA3 | cna | amp     | BASIS    |
| PD8621       | GATA3 | cna | gain    | BASIS    |
| PD8980       | GATA3 | cna | gain    | BASIS    |
| PD9004       | GATA3 | cna | gain    | BASIS    |
| PD9702       | GATA3 | cna | amp     | BASIS    |
| TCGA-A2-A25B | GTSE1 | cna | hetloss | TCGA     |
| TCGA-AN-A0XU | GTSE1 | cna | hetloss | TCGA     |
| TCGA-BH-A0AW | GTSE1 | cna | hetloss | TCGA     |
| TCGA-BH-A1FU | GTSE1 | cna | gain    | TCGA     |
| TCGA-C8-A12L | GTSE1 | cna | gain    | TCGA     |
| TCGA-D8-A27M | GTSE1 | cna | gain    | TCGA     |
| TCGA-E9-A1NC | GTSE1 | cna | gain    | TCGA     |
| MB-5070      | GTSE1 | cna | gain    | METABRIC |
| MB-5465      | GTSE1 | cna | gain    | METABRIC |
| MB-6098      | GTSE1 | cna | gain    | METABRIC |

|              |       |     |         |          |
|--------------|-------|-----|---------|----------|
| MB-0420      | GTSE1 | cna | gain    | METABRIC |
| MTS-T0064    | GTSE1 | cna | gain    | METABRIC |
| PD11327      | GTSE1 | cna | amp     | BASIS    |
| PD11742      | GTSE1 | cna | hetloss | BASIS    |
| PD13296      | GTSE1 | cna | hetloss | BASIS    |
| PD13297      | GTSE1 | cna | hetloss | BASIS    |
| PD13299      | GTSE1 | cna | gain    | BASIS    |
| PD14442      | GTSE1 | cna | hetloss | BASIS    |
| PD22355      | GTSE1 | cna | gain    | BASIS    |
| PD23562      | GTSE1 | cna | gain    | BASIS    |
| PD23578      | GTSE1 | cna | gain    | BASIS    |
| PD24186      | GTSE1 | cna | gain    | BASIS    |
| PD24202      | GTSE1 | cna | hetloss | BASIS    |
| PD3905       | GTSE1 | cna | gain    | BASIS    |
| PD4005       | GTSE1 | cna | gain    | BASIS    |
| PD4006       | GTSE1 | cna | gain    | BASIS    |
| PD4107       | GTSE1 | cna | gain    | BASIS    |
| PD4826       | GTSE1 | cna | gain    | BASIS    |
| PD5935       | GTSE1 | cna | amp     | BASIS    |
| PD5945       | GTSE1 | cna | amp     | BASIS    |
| PD5948       | GTSE1 | cna | hetloss | BASIS    |
| PD6406       | GTSE1 | cna | gain    | BASIS    |
| PD6731       | GTSE1 | cna | hetloss | BASIS    |
| PD7067       | GTSE1 | cna | gain    | BASIS    |
| PD7215       | GTSE1 | cna | gain    | BASIS    |
| PD8621       | GTSE1 | cna | gain    | BASIS    |
| PD8980       | GTSE1 | cna | hetloss | BASIS    |
| PD9004       | GTSE1 | cna | gain    | BASIS    |
| PD9585       | GTSE1 | cna | hetloss | BASIS    |
| PD9702       | GTSE1 | cna | gain    | BASIS    |
| TCGA-A2-A25B | H3F3C | cna | hetloss | TCGA     |
| TCGA-AN-A0XU | H3F3C | cna | gain    | TCGA     |
| TCGA-AO-A0JL | H3F3C | cna | gain    | TCGA     |
| TCGA-BH-A0C0 | H3F3C | cna | hetloss | TCGA     |
| TCGA-BH-A18R | H3F3C | cna | gain    | TCGA     |
| TCGA-BH-A1FU | H3F3C | cna | hetloss | TCGA     |
| TCGA-C8-A12L | H3F3C | cna | gain    | TCGA     |
| TCGA-D8-A27M | H3F3C | cna | amp     | TCGA     |
| TCGA-E2-A1L7 | H3F3C | cna | hetloss | TCGA     |
| TCGA-LL-A5YP | H3F3C | cna | hetloss | TCGA     |
| MB-0346      | H3F3C | cna | gain    | METABRIC |
| MB-2827      | H3F3C | cna | hetloss | METABRIC |
| MB-5465      | H3F3C | cna | hetloss | METABRIC |
| MB-6098      | H3F3C | cna | gain    | METABRIC |
| MB-7038      | H3F3C | cna | hetloss | METABRIC |
| MTS-T0064    | H3F3C | cna | gain    | METABRIC |
| PD10014      | H3F3C | cna | gain    | BASIS    |

|              |       |     |         |          |
|--------------|-------|-----|---------|----------|
| PD11327      | H3F3C | cna | gain    | BASIS    |
| PD13296      | H3F3C | cna | gain    | BASIS    |
| PD13299      | H3F3C | cna | gain    | BASIS    |
| PD13771      | H3F3C | cna | hetloss | BASIS    |
| PD23574      | H3F3C | cna | gain    | BASIS    |
| PD23578      | H3F3C | cna | gain    | BASIS    |
| PD24186      | H3F3C | cna | gain    | BASIS    |
| PD3905       | H3F3C | cna | gain    | BASIS    |
| PD4005       | H3F3C | cna | hetloss | BASIS    |
| PD4006       | H3F3C | cna | gain    | BASIS    |
| PD4107       | H3F3C | cna | gain    | BASIS    |
| PD4826       | H3F3C | cna | hetloss | BASIS    |
| PD5930       | H3F3C | cna | amp     | BASIS    |
| PD5935       | H3F3C | cna | gain    | BASIS    |
| PD5945       | H3F3C | cna | gain    | BASIS    |
| PD5948       | H3F3C | cna | hetloss | BASIS    |
| PD6731       | H3F3C | cna | hetloss | BASIS    |
| PD7067       | H3F3C | cna | gain    | BASIS    |
| PD7215       | H3F3C | cna | gain    | BASIS    |
| PD8621       | H3F3C | cna | gain    | BASIS    |
| PD8980       | H3F3C | cna | hetloss | BASIS    |
| PD9004       | H3F3C | cna | amp     | BASIS    |
| PD9702       | H3F3C | cna | gain    | BASIS    |
| TCGA-A2-A25B | HRAS  | cna | hetloss | TCGA     |
| TCGA-AN-A0XU | HRAS  | cna | hetloss | TCGA     |
| TCGA-AO-A0JL | HRAS  | cna | hetloss | TCGA     |
| TCGA-BH-A0AW | HRAS  | cna | hetloss | TCGA     |
| TCGA-BH-A0C0 | HRAS  | cna | hetloss | TCGA     |
| TCGA-C8-A12L | HRAS  | cna | hetloss | TCGA     |
| TCGA-E2-A1L7 | HRAS  | cna | homdel  | TCGA     |
| TCGA-LL-A5YP | HRAS  | cna | hetloss | TCGA     |
| MB-0346      | HRAS  | cna | hetloss | METABRIC |
| MB-5070      | HRAS  | cna | hetloss | METABRIC |
| MB-6060      | HRAS  | cna | hetloss | METABRIC |
| MB-6098      | HRAS  | cna | hetloss | METABRIC |
| MB-6271      | HRAS  | cna | gain    | METABRIC |
| MB-7032      | HRAS  | cna | gain    | METABRIC |
| MB-7048      | HRAS  | cna | hetloss | METABRIC |
| MB-0420      | HRAS  | cna | hetloss | METABRIC |
| PD10014      | HRAS  | cna | hetloss | BASIS    |
| PD11742      | HRAS  | cna | hetloss | BASIS    |
| PD13296      | HRAS  | cna | hetloss | BASIS    |
| PD13297      | HRAS  | cna | hetloss | BASIS    |
| PD22355      | HRAS  | cna | hetloss | BASIS    |
| PD23574      | HRAS  | cna | gain    | BASIS    |
| PD24202      | HRAS  | cna | hetloss | BASIS    |
| PD24206      | HRAS  | cna | gain    | BASIS    |

|              |          |     |         |          |
|--------------|----------|-----|---------|----------|
| PD24337      | HRAS     | cna | gain    | BASIS    |
| PD3890       | HRAS     | cna | hetloss | BASIS    |
| PD3905       | HRAS     | cna | gain    | BASIS    |
| PD4005       | HRAS     | cna | hetloss | BASIS    |
| PD4006       | HRAS     | cna | gain    | BASIS    |
| PD4107       | HRAS     | cna | gain    | BASIS    |
| PD4826       | HRAS     | cna | gain    | BASIS    |
| PD4967       | HRAS     | cna | gain    | BASIS    |
| PD5935       | HRAS     | cna | gain    | BASIS    |
| PD5945       | HRAS     | cna | gain    | BASIS    |
| PD5948       | HRAS     | cna | gain    | BASIS    |
| PD6413       | HRAS     | cna | hetloss | BASIS    |
| PD6731       | HRAS     | cna | hetloss | BASIS    |
| PD8980       | HRAS     | cna | hetloss | BASIS    |
| PD9004       | HRAS     | cna | hetloss | BASIS    |
| PD9585       | HRAS     | cna | hetloss | BASIS    |
| TCGA-A2-A25B | HSP90AA1 | cna | hetloss | TCGA     |
| TCGA-AN-A0XU | HSP90AA1 | cna | gain    | TCGA     |
| TCGA-AO-A0JL | HSP90AA1 | cna | hetloss | TCGA     |
| TCGA-BH-A0AW | HSP90AA1 | cna | hetloss | TCGA     |
| TCGA-BH-A1FU | HSP90AA1 | cna | gain    | TCGA     |
| TCGA-C8-A12L | HSP90AA1 | cna | gain    | TCGA     |
| TCGA-D8-A27M | HSP90AA1 | cna | hetloss | TCGA     |
| TCGA-E2-A1L7 | HSP90AA1 | cna | gain    | TCGA     |
| TCGA-E9-A1NC | HSP90AA1 | cna | hetloss | TCGA     |
| TCGA-LL-A5YP | HSP90AA1 | cna | hetloss | TCGA     |
| MB-0346      | HSP90AA1 | cna | gain    | METABRIC |
| MB-2827      | HSP90AA1 | cna | hetloss | METABRIC |
| MB-5070      | HSP90AA1 | cna | hetloss | METABRIC |
| MB-5107      | HSP90AA1 | cna | hetloss | METABRIC |
| MB-6060      | HSP90AA1 | cna | gain    | METABRIC |
| MB-6098      | HSP90AA1 | cna | hetloss | METABRIC |
| MTS-T0064    | HSP90AA1 | cna | hetloss | METABRIC |
| PD10014      | HSP90AA1 | cna | hetloss | BASIS    |
| PD11742      | HSP90AA1 | cna | hetloss | BASIS    |
| PD13296      | HSP90AA1 | cna | gain    | BASIS    |
| PD13297      | HSP90AA1 | cna | hetloss | BASIS    |
| PD13771      | HSP90AA1 | cna | hetloss | BASIS    |
| PD22355      | HSP90AA1 | cna | hetloss | BASIS    |
| PD23578      | HSP90AA1 | cna | hetloss | BASIS    |
| PD24202      | HSP90AA1 | cna | hetloss | BASIS    |
| PD24206      | HSP90AA1 | cna | gain    | BASIS    |
| PD24337      | HSP90AA1 | cna | hetloss | BASIS    |
| PD3890       | HSP90AA1 | cna | hetloss | BASIS    |
| PD3905       | HSP90AA1 | cna | gain    | BASIS    |
| PD4006       | HSP90AA1 | cna | gain    | BASIS    |
| PD4826       | HSP90AA1 | cna | gain    | BASIS    |

|              |          |     |         |          |
|--------------|----------|-----|---------|----------|
| PD4967       | HSP90AA1 | cna | hetloss | BASIS    |
| PD5945       | HSP90AA1 | cna | gain    | BASIS    |
| PD5948       | HSP90AA1 | cna | gain    | BASIS    |
| PD6406       | HSP90AA1 | cna | hetloss | BASIS    |
| PD6413       | HSP90AA1 | cna | hetloss | BASIS    |
| PD7067       | HSP90AA1 | cna | gain    | BASIS    |
| PD8621       | HSP90AA1 | cna | gain    | BASIS    |
| PD8980       | HSP90AA1 | cna | hetloss | BASIS    |
| PD9702       | HSP90AA1 | cna | gain    | BASIS    |
| TCGA-A2-A25B | IGF1R    | cna | amp     | TCGA     |
| TCGA-AN-A0XU | IGF1R    | cna | gain    | TCGA     |
| TCGA-AO-A0JL | IGF1R    | cna | hetloss | TCGA     |
| TCGA-BH-A0C0 | IGF1R    | cna | gain    | TCGA     |
| TCGA-D8-A27M | IGF1R    | cna | hetloss | TCGA     |
| TCGA-E2-A1L7 | IGF1R    | cna | amp     | TCGA     |
| TCGA-LL-A5YP | IGF1R    | cna | amp     | TCGA     |
| MB-0346      | IGF1R    | cna | hetloss | METABRIC |
| MB-2827      | IGF1R    | cna | amp     | METABRIC |
| MB-5070      | IGF1R    | cna | gain    | METABRIC |
| MB-5465      | IGF1R    | cna | hetloss | METABRIC |
| MB-6060      | IGF1R    | cna | hetloss | METABRIC |
| MB-7038      | IGF1R    | cna | gain    | METABRIC |
| MB-7048      | IGF1R    | cna | gain    | METABRIC |
| MB-0420      | IGF1R    | cna | gain    | METABRIC |
| MTS-T0064    | IGF1R    | cna | gain    | METABRIC |
| PD10014      | IGF1R    | cna | gain    | BASIS    |
| PD11327      | IGF1R    | cna | gain    | BASIS    |
| PD11742      | IGF1R    | cna | hetloss | BASIS    |
| PD13296      | IGF1R    | cna | gain    | BASIS    |
| PD13299      | IGF1R    | cna | amp     | BASIS    |
| PD23562      | IGF1R    | cna | gain    | BASIS    |
| PD23574      | IGF1R    | cna | gain    | BASIS    |
| PD23578      | IGF1R    | cna | gain    | BASIS    |
| PD24202      | IGF1R    | cna | hetloss | BASIS    |
| PD24206      | IGF1R    | cna | gain    | BASIS    |
| PD24337      | IGF1R    | cna | gain    | BASIS    |
| PD3890       | IGF1R    | cna | hetloss | BASIS    |
| PD3905       | IGF1R    | cna | gain    | BASIS    |
| PD4006       | IGF1R    | cna | amp     | BASIS    |
| PD4107       | IGF1R    | cna | gain    | BASIS    |
| PD5930       | IGF1R    | cna | gain    | BASIS    |
| PD5945       | IGF1R    | cna | amp     | BASIS    |
| PD5948       | IGF1R    | cna | gain    | BASIS    |
| PD6413       | IGF1R    | cna | hetloss | BASIS    |
| PD7067       | IGF1R    | cna | gain    | BASIS    |
| PD8621       | IGF1R    | cna | gain    | BASIS    |
| PD8980       | IGF1R    | cna | gain    | BASIS    |

|              |       |     |         |          |
|--------------|-------|-----|---------|----------|
| PD9585       | IGF1R | cna | hetloss | BASIS    |
| PD9702       | IGF1R | cna | gain    | BASIS    |
| TCGA-A2-A25B | IL2   | cna | gain    | TCGA     |
| TCGA-AN-A0XU | IL2   | cna | hetloss | TCGA     |
| TCGA-BH-A0AW | IL2   | cna | hetloss | TCGA     |
| TCGA-BH-A0C0 | IL2   | cna | hetloss | TCGA     |
| TCGA-BH-A1FU | IL2   | cna | gain    | TCGA     |
| TCGA-C8-A12L | IL2   | cna | homdel  | TCGA     |
| TCGA-D8-A27M | IL2   | cna | hetloss | TCGA     |
| TCGA-E2-A1L7 | IL2   | cna | hetloss | TCGA     |
| TCGA-E9-A1NC | IL2   | cna | hetloss | TCGA     |
| TCGA-LL-A5YP | IL2   | cna | homdel  | TCGA     |
| MB-5070      | IL2   | cna | hetloss | METABRIC |
| MB-5465      | IL2   | cna | gain    | METABRIC |
| MB-7048      | IL2   | cna | hetloss | METABRIC |
| MB-0420      | IL2   | cna | hetloss | METABRIC |
| PD10014      | IL2   | cna | gain    | BASIS    |
| PD11742      | IL2   | cna | hetloss | BASIS    |
| PD13296      | IL2   | cna | hetloss | BASIS    |
| PD13297      | IL2   | cna | hetloss | BASIS    |
| PD22355      | IL2   | cna | hetloss | BASIS    |
| PD23562      | IL2   | cna | gain    | BASIS    |
| PD23574      | IL2   | cna | gain    | BASIS    |
| PD23578      | IL2   | cna | hetloss | BASIS    |
| PD24202      | IL2   | cna | hetloss | BASIS    |
| PD24206      | IL2   | cna | gain    | BASIS    |
| PD24337      | IL2   | cna | hetloss | BASIS    |
| PD3905       | IL2   | cna | gain    | BASIS    |
| PD4005       | IL2   | cna | hetloss | BASIS    |
| PD4006       | IL2   | cna | hetloss | BASIS    |
| PD4107       | IL2   | cna | gain    | BASIS    |
| PD4826       | IL2   | cna | gain    | BASIS    |
| PD5935       | IL2   | cna | gain    | BASIS    |
| PD5945       | IL2   | cna | amp     | BASIS    |
| PD5948       | IL2   | cna | gain    | BASIS    |
| PD6406       | IL2   | cna | hetloss | BASIS    |
| PD6731       | IL2   | cna | hetloss | BASIS    |
| PD7067       | IL2   | cna | gain    | BASIS    |
| PD7215       | IL2   | cna | gain    | BASIS    |
| PD8621       | IL2   | cna | hetloss | BASIS    |
| PD8980       | IL2   | cna | hetloss | BASIS    |
| PD9585       | IL2   | cna | hetloss | BASIS    |
| TCGA-AN-A0XU | ITK   | cna | hetloss | TCGA     |
| TCGA-AO-A0JL | ITK   | cna | gain    | TCGA     |
| TCGA-BH-A0C0 | ITK   | cna | hetloss | TCGA     |
| TCGA-BH-A1FU | ITK   | cna | hetloss | TCGA     |
| TCGA-C8-A12L | ITK   | cna | hetloss | TCGA     |

|              |        |     |         |          |
|--------------|--------|-----|---------|----------|
| TCGA-D8-A27M | ITK    | cna | hetloss | TCGA     |
| TCGA-E2-A1L7 | ITK    | cna | hetloss | TCGA     |
| TCGA-E9-A1NC | ITK    | cna | hetloss | TCGA     |
| TCGA-LL-A5YP | ITK    | cna | hetloss | TCGA     |
| MB-0346      | ITK    | cna | gain    | METABRIC |
| MB-5070      | ITK    | cna | hetloss | METABRIC |
| MB-5465      | ITK    | cna | hetloss | METABRIC |
| MB-6098      | ITK    | cna | hetloss | METABRIC |
| MB-7038      | ITK    | cna | hetloss | METABRIC |
| MB-0420      | ITK    | cna | hetloss | METABRIC |
| PD10014      | ITK    | cna | hetloss | BASIS    |
| PD11327      | ITK    | cna | hetloss | BASIS    |
| PD13296      | ITK    | cna | hetloss | BASIS    |
| PD13297      | ITK    | cna | hetloss | BASIS    |
| PD13771      | ITK    | cna | gain    | BASIS    |
| PD22355      | ITK    | cna | hetloss | BASIS    |
| PD23578      | ITK    | cna | hetloss | BASIS    |
| PD24186      | ITK    | cna | gain    | BASIS    |
| PD24202      | ITK    | cna | hetloss | BASIS    |
| PD24206      | ITK    | cna | gain    | BASIS    |
| PD24337      | ITK    | cna | hetloss | BASIS    |
| PD3890       | ITK    | cna | hetloss | BASIS    |
| PD3905       | ITK    | cna | gain    | BASIS    |
| PD4005       | ITK    | cna | hetloss | BASIS    |
| PD4006       | ITK    | cna | hetloss | BASIS    |
| PD4107       | ITK    | cna | hetloss | BASIS    |
| PD4826       | ITK    | cna | gain    | BASIS    |
| PD5935       | ITK    | cna | gain    | BASIS    |
| PD5945       | ITK    | cna | gain    | BASIS    |
| PD5948       | ITK    | cna | hetloss | BASIS    |
| PD6406       | ITK    | cna | hetloss | BASIS    |
| PD6413       | ITK    | cna | hetloss | BASIS    |
| PD8621       | ITK    | cna | hetloss | BASIS    |
| PD8980       | ITK    | cna | hetloss | BASIS    |
| PD9585       | ITK    | cna | hetloss | BASIS    |
| TCGA-A2-A25B | JARID2 | cna | gain    | TCGA     |
| TCGA-AN-A0XU | JARID2 | cna | hetloss | TCGA     |
| TCGA-AO-A0JL | JARID2 | cna | gain    | TCGA     |
| TCGA-BH-A0AW | JARID2 | cna | gain    | TCGA     |
| TCGA-BH-A0C0 | JARID2 | cna | hetloss | TCGA     |
| TCGA-BH-A18R | JARID2 | cna | homdel  | TCGA     |
| TCGA-C8-A12L | JARID2 | cna | hetloss | TCGA     |
| TCGA-D8-A27M | JARID2 | cna | hetloss | TCGA     |
| TCGA-E2-A1L7 | JARID2 | cna | hetloss | TCGA     |
| MB-0346      | JARID2 | cna | hetloss | METABRIC |
| MB-2827      | JARID2 | cna | amp     | METABRIC |
| MB-5070      | JARID2 | cna | amp     | METABRIC |



|              |          |     |         |          |
|--------------|----------|-----|---------|----------|
| MB-5465      | JARID2   | cna | gain    | METABRIC |
| MB-6060      | JARID2   | cna | gain    | METABRIC |
| MB-6098      | JARID2   | cna | hetloss | METABRIC |
| PD11327      | JARID2   | cna | amp     | BASIS    |
| PD13296      | JARID2   | cna | gain    | BASIS    |
| PD13297      | JARID2   | cna | gain    | BASIS    |
| PD13299      | JARID2   | cna | gain    | BASIS    |
| PD22355      | JARID2   | cna | gain    | BASIS    |
| PD23562      | JARID2   | cna | gain    | BASIS    |
| PD23574      | JARID2   | cna | gain    | BASIS    |
| PD24186      | JARID2   | cna | gain    | BASIS    |
| PD24202      | JARID2   | cna | gain    | BASIS    |
| PD24206      | JARID2   | cna | gain    | BASIS    |
| PD3905       | JARID2   | cna | amp     | BASIS    |
| PD4005       | JARID2   | cna | hetloss | BASIS    |
| PD4006       | JARID2   | cna | gain    | BASIS    |
| PD4107       | JARID2   | cna | gain    | BASIS    |
| PD4826       | JARID2   | cna | gain    | BASIS    |
| PD5935       | JARID2   | cna | gain    | BASIS    |
| PD5945       | JARID2   | cna | amp     | BASIS    |
| PD5948       | JARID2   | cna | gain    | BASIS    |
| PD6731       | JARID2   | cna | hetloss | BASIS    |
| PD7067       | JARID2   | cna | gain    | BASIS    |
| PD7215       | JARID2   | cna | gain    | BASIS    |
| PD8621       | JARID2   | cna | amp     | BASIS    |
| PD9004       | JARID2   | cna | gain    | BASIS    |
| PD9585       | JARID2   | cna | hetloss | BASIS    |
| PD9702       | JARID2   | cna | gain    | BASIS    |
| TCGA-A2-A25B | KIAA1109 | cna | gain    | TCGA     |
| TCGA-AN-A0XU | KIAA1109 | cna | hetloss | TCGA     |
| TCGA-BH-A0AW | KIAA1109 | cna | hetloss | TCGA     |
| TCGA-BH-A0C0 | KIAA1109 | cna | hetloss | TCGA     |
| TCGA-BH-A1FU | KIAA1109 | cna | gain    | TCGA     |
| TCGA-C8-A12L | KIAA1109 | cna | homdel  | TCGA     |
| TCGA-D8-A27M | KIAA1109 | cna | hetloss | TCGA     |
| TCGA-E2-A1L7 | KIAA1109 | cna | hetloss | TCGA     |
| TCGA-E9-A1NC | KIAA1109 | cna | hetloss | TCGA     |
| TCGA-LL-A5YP | KIAA1109 | cna | gain    | TCGA     |
| MB-5070      | KIAA1109 | cna | hetloss | METABRIC |
| MB-5465      | KIAA1109 | cna | gain    | METABRIC |
| MB-7048      | KIAA1109 | cna | hetloss | METABRIC |
| MB-0420      | KIAA1109 | cna | hetloss | METABRIC |
| PD10014      | KIAA1109 | cna | gain    | BASIS    |
| PD11742      | KIAA1109 | cna | hetloss | BASIS    |
| PD13296      | KIAA1109 | cna | hetloss | BASIS    |
| PD13297      | KIAA1109 | cna | hetloss | BASIS    |
| PD22355      | KIAA1109 | cna | hetloss | BASIS    |

|              |          |     |         |          |
|--------------|----------|-----|---------|----------|
| PD23562      | KIAA1109 | cna | gain    | BASIS    |
| PD23574      | KIAA1109 | cna | gain    | BASIS    |
| PD23578      | KIAA1109 | cna | hetloss | BASIS    |
| PD24202      | KIAA1109 | cna | hetloss | BASIS    |
| PD24206      | KIAA1109 | cna | gain    | BASIS    |
| PD24337      | KIAA1109 | cna | hetloss | BASIS    |
| PD3905       | KIAA1109 | cna | gain    | BASIS    |
| PD4005       | KIAA1109 | cna | hetloss | BASIS    |
| PD4006       | KIAA1109 | cna | hetloss | BASIS    |
| PD4107       | KIAA1109 | cna | gain    | BASIS    |
| PD4826       | KIAA1109 | cna | gain    | BASIS    |
| PD5935       | KIAA1109 | cna | gain    | BASIS    |
| PD5945       | KIAA1109 | cna | amp     | BASIS    |
| PD5948       | KIAA1109 | cna | gain    | BASIS    |
| PD6406       | KIAA1109 | cna | hetloss | BASIS    |
| PD6731       | KIAA1109 | cna | hetloss | BASIS    |
| PD7067       | KIAA1109 | cna | gain    | BASIS    |
| PD7215       | KIAA1109 | cna | gain    | BASIS    |
| PD8621       | KIAA1109 | cna | hetloss | BASIS    |
| PD8980       | KIAA1109 | cna | hetloss | BASIS    |
| PD9585       | KIAA1109 | cna | hetloss | BASIS    |
| TCGA-A2-A25B | LEF1     | cna | hetloss | TCGA     |
| TCGA-AN-A0XU | LEF1     | cna | hetloss | TCGA     |
| TCGA-BH-A0AW | LEF1     | cna | hetloss | TCGA     |
| TCGA-BH-A0C0 | LEF1     | cna | hetloss | TCGA     |
| TCGA-BH-A1FU | LEF1     | cna | gain    | TCGA     |
| TCGA-C8-A12L | LEF1     | cna | hetloss | TCGA     |
| TCGA-D8-A27M | LEF1     | cna | hetloss | TCGA     |
| TCGA-E2-A1L7 | LEF1     | cna | hetloss | TCGA     |
| TCGA-E9-A1NC | LEF1     | cna | hetloss | TCGA     |
| TCGA-LL-A5YP | LEF1     | cna | gain    | TCGA     |
| MB-2827      | LEF1     | cna | hetloss | METABRIC |
| MB-5070      | LEF1     | cna | hetloss | METABRIC |
| MB-5465      | LEF1     | cna | hetloss | METABRIC |
| MB-7048      | LEF1     | cna | hetloss | METABRIC |
| MB-0420      | LEF1     | cna | hetloss | METABRIC |
| PD10014      | LEF1     | cna | gain    | BASIS    |
| PD11742      | LEF1     | cna | hetloss | BASIS    |
| PD13296      | LEF1     | cna | hetloss | BASIS    |
| PD13297      | LEF1     | cna | hetloss | BASIS    |
| PD22355      | LEF1     | cna | hetloss | BASIS    |
| PD23562      | LEF1     | cna | gain    | BASIS    |
| PD23578      | LEF1     | cna | hetloss | BASIS    |
| PD24202      | LEF1     | cna | hetloss | BASIS    |
| PD24206      | LEF1     | cna | gain    | BASIS    |
| PD24337      | LEF1     | cna | hetloss | BASIS    |
| PD3890       | LEF1     | cna | gain    | BASIS    |

|              |       |     |         |          |
|--------------|-------|-----|---------|----------|
| PD3905       | LEF1  | cna | gain    | BASIS    |
| PD4006       | LEF1  | cna | hetloss | BASIS    |
| PD4107       | LEF1  | cna | gain    | BASIS    |
| PD4826       | LEF1  | cna | gain    | BASIS    |
| PD5930       | LEF1  | cna | hetloss | BASIS    |
| PD5935       | LEF1  | cna | gain    | BASIS    |
| PD5945       | LEF1  | cna | gain    | BASIS    |
| PD5948       | LEF1  | cna | gain    | BASIS    |
| PD6406       | LEF1  | cna | hetloss | BASIS    |
| PD7067       | LEF1  | cna | gain    | BASIS    |
| PD7215       | LEF1  | cna | gain    | BASIS    |
| PD8621       | LEF1  | cna | hetloss | BASIS    |
| PD8980       | LEF1  | cna | hetloss | BASIS    |
| PD9585       | LEF1  | cna | hetloss | BASIS    |
| TCGA-A2-A25B | MED12 | cna | gain    | TCGA     |
| TCGA-AN-A0XU | MED12 | cna | hetloss | TCGA     |
| TCGA-AO-A0JL | MED12 | cna | gain    | TCGA     |
| TCGA-BH-A0AW | MED12 | cna | gain    | TCGA     |
| TCGA-C8-A12L | MED12 | cna | hetloss | TCGA     |
| TCGA-E2-A1L7 | MED12 | cna | hetloss | TCGA     |
| TCGA-E9-A1NC | MED12 | cna | hetloss | TCGA     |
| MB-0346      | MED12 | cna | hetloss | METABRIC |
| MB-2827      | MED12 | cna | hetloss | METABRIC |
| MB-5465      | MED12 | cna | gain    | METABRIC |
| MB-6060      | MED12 | cna | hetloss | METABRIC |
| MB-0420      | MED12 | cna | hetloss | METABRIC |
| PD10014      | MED12 | cna | hetloss | BASIS    |
| PD11327      | MED12 | cna | hetloss | BASIS    |
| PD13296      | MED12 | cna | amp     | BASIS    |
| PD13297      | MED12 | cna | gain    | BASIS    |
| PD13299      | MED12 | cna | gain    | BASIS    |
| PD13771      | MED12 | cna | gain    | BASIS    |
| PD14442      | MED12 | cna | gain    | BASIS    |
| PD23562      | MED12 | cna | hetloss | BASIS    |
| PD23574      | MED12 | cna | gain    | BASIS    |
| PD24202      | MED12 | cna | gain    | BASIS    |
| PD24206      | MED12 | cna | gain    | BASIS    |
| PD3890       | MED12 | cna | gain    | BASIS    |
| PD3905       | MED12 | cna | gain    | BASIS    |
| PD4005       | MED12 | cna | hetloss | BASIS    |
| PD4006       | MED12 | cna | gain    | BASIS    |
| PD4107       | MED12 | cna | amp     | BASIS    |
| PD4826       | MED12 | cna | gain    | BASIS    |
| PD4967       | MED12 | cna | gain    | BASIS    |
| PD5930       | MED12 | cna | gain    | BASIS    |
| PD5935       | MED12 | cna | gain    | BASIS    |
| PD5948       | MED12 | cna | gain    | BASIS    |

|              |       |     |         |          |
|--------------|-------|-----|---------|----------|
| PD6406       | MED12 | cna | gain    | BASIS    |
| PD6413       | MED12 | cna | gain    | BASIS    |
| PD7067       | MED12 | cna | gain    | BASIS    |
| PD7215       | MED12 | cna | gain    | BASIS    |
| PD8621       | MED12 | cna | amp     | BASIS    |
| PD8980       | MED12 | cna | gain    | BASIS    |
| PD9004       | MED12 | cna | gain    | BASIS    |
| TCGA-A2-A25B | MNX1  | cna | gain    | TCGA     |
| TCGA-AN-A0XU | MNX1  | cna | hetloss | TCGA     |
| TCGA-AO-A0JL | MNX1  | cna | gain    | TCGA     |
| TCGA-C8-A12L | MNX1  | cna | hetloss | TCGA     |
| TCGA-D8-A27M | MNX1  | cna | gain    | TCGA     |
| TCGA-E2-A1L7 | MNX1  | cna | hetloss | TCGA     |
| TCGA-E9-A1NC | MNX1  | cna | hetloss | TCGA     |
| TCGA-LL-A5YP | MNX1  | cna | hetloss | TCGA     |
| MB-0346      | MNX1  | cna | hetloss | METABRIC |
| MB-5070      | MNX1  | cna | hetloss | METABRIC |
| MB-6098      | MNX1  | cna | gain    | METABRIC |
| MB-7038      | MNX1  | cna | amp     | METABRIC |
| MB-7048      | MNX1  | cna | gain    | METABRIC |
| MB-0420      | MNX1  | cna | hetloss | METABRIC |
| PD11327      | MNX1  | cna | gain    | BASIS    |
| PD13296      | MNX1  | cna | homdel  | BASIS    |
| PD13297      | MNX1  | cna | gain    | BASIS    |
| PD22355      | MNX1  | cna | hetloss | BASIS    |
| PD23562      | MNX1  | cna | gain    | BASIS    |
| PD23574      | MNX1  | cna | gain    | BASIS    |
| PD23578      | MNX1  | cna | hetloss | BASIS    |
| PD24186      | MNX1  | cna | gain    | BASIS    |
| PD24202      | MNX1  | cna | gain    | BASIS    |
| PD24206      | MNX1  | cna | gain    | BASIS    |
| PD24337      | MNX1  | cna | hetloss | BASIS    |
| PD3890       | MNX1  | cna | hetloss | BASIS    |
| PD3905       | MNX1  | cna | gain    | BASIS    |
| PD4006       | MNX1  | cna | gain    | BASIS    |
| PD4107       | MNX1  | cna | gain    | BASIS    |
| PD5930       | MNX1  | cna | amp     | BASIS    |
| PD5945       | MNX1  | cna | amp     | BASIS    |
| PD5948       | MNX1  | cna | gain    | BASIS    |
| PD6406       | MNX1  | cna | gain    | BASIS    |
| PD6731       | MNX1  | cna | hetloss | BASIS    |
| PD7215       | MNX1  | cna | gain    | BASIS    |
| PD8621       | MNX1  | cna | gain    | BASIS    |
| PD8980       | MNX1  | cna | gain    | BASIS    |
| PD9004       | MNX1  | cna | gain    | BASIS    |
| PD9585       | MNX1  | cna | hetloss | BASIS    |
| PD9702       | MNX1  | cna | gain    | BASIS    |

|              |       |     |         |          |
|--------------|-------|-----|---------|----------|
| TCGA-A2-A25B | NCOR1 | cna | hetloss | TCGA     |
| TCGA-AN-A0XU | NCOR1 | cna | hetloss | TCGA     |
| TCGA-AO-A0JL | NCOR1 | cna | gain    | TCGA     |
| TCGA-BH-A0AW | NCOR1 | cna | hetloss | TCGA     |
| TCGA-BH-A0C0 | NCOR1 | cna | hetloss | TCGA     |
| TCGA-C8-A12L | NCOR1 | cna | hetloss | TCGA     |
| TCGA-D8-A27M | NCOR1 | cna | hetloss | TCGA     |
| TCGA-E2-A1L7 | NCOR1 | cna | hetloss | TCGA     |
| TCGA-E9-A1NC | NCOR1 | cna | hetloss | TCGA     |
| TCGA-LL-A5YP | NCOR1 | cna | gain    | TCGA     |
| MB-0346      | NCOR1 | cna | hetloss | METABRIC |
| MB-2827      | NCOR1 | cna | hetloss | METABRIC |
| MB-5070      | NCOR1 | cna | hetloss | METABRIC |
| MB-5107      | NCOR1 | cna | homdel  | METABRIC |
| MB-5465      | NCOR1 | cna | hetloss | METABRIC |
| MB-6098      | NCOR1 | cna | hetloss | METABRIC |
| MB-6271      | NCOR1 | cna | hetloss | METABRIC |
| MB-7038      | NCOR1 | cna | hetloss | METABRIC |
| MB-7048      | NCOR1 | cna | hetloss | METABRIC |
| MB-0420      | NCOR1 | cna | hetloss | METABRIC |
| PD11742      | NCOR1 | cna | hetloss | BASIS    |
| PD13296      | NCOR1 | cna | hetloss | BASIS    |
| PD13297      | NCOR1 | cna | hetloss | BASIS    |
| PD13771      | NCOR1 | cna | hetloss | BASIS    |
| PD22355      | NCOR1 | cna | hetloss | BASIS    |
| PD23561      | NCOR1 | cna | hetloss | BASIS    |
| PD24202      | NCOR1 | cna | hetloss | BASIS    |
| PD24206      | NCOR1 | cna | hetloss | BASIS    |
| PD24337      | NCOR1 | cna | hetloss | BASIS    |
| PD3890       | NCOR1 | cna | hetloss | BASIS    |
| PD3905       | NCOR1 | cna | gain    | BASIS    |
| PD4005       | NCOR1 | cna | hetloss | BASIS    |
| PD4826       | NCOR1 | cna | hetloss | BASIS    |
| PD4967       | NCOR1 | cna | hetloss | BASIS    |
| PD5945       | NCOR1 | cna | gain    | BASIS    |
| PD6406       | NCOR1 | cna | hetloss | BASIS    |
| PD6413       | NCOR1 | cna | hetloss | BASIS    |
| PD6731       | NCOR1 | cna | hetloss | BASIS    |
| PD7067       | NCOR1 | cna | gain    | BASIS    |
| PD9585       | NCOR1 | cna | hetloss | BASIS    |
| TCGA-A2-A25B | NFKB2 | cna | hetloss | TCGA     |
| TCGA-AN-A0XU | NFKB2 | cna | hetloss | TCGA     |
| TCGA-AO-A0JL | NFKB2 | cna | hetloss | TCGA     |
| TCGA-BH-A18R | NFKB2 | cna | gain    | TCGA     |
| TCGA-C8-A12L | NFKB2 | cna | hetloss | TCGA     |
| TCGA-D8-A27M | NFKB2 | cna | hetloss | TCGA     |
| TCGA-E2-A1L7 | NFKB2 | cna | hetloss | TCGA     |

|              |       |     |         |          |
|--------------|-------|-----|---------|----------|
| TCGA-LL-A5YP | NFKB2 | cna | gain    | TCGA     |
| MB-0346      | NFKB2 | cna | gain    | METABRIC |
| MB-2827      | NFKB2 | cna | hetloss | METABRIC |
| MB-5070      | NFKB2 | cna | hetloss | METABRIC |
| MB-6060      | NFKB2 | cna | hetloss | METABRIC |
| MB-6098      | NFKB2 | cna | hetloss | METABRIC |
| MB-7038      | NFKB2 | cna | hetloss | METABRIC |
| MB-7048      | NFKB2 | cna | hetloss | METABRIC |
| MB-0420      | NFKB2 | cna | hetloss | METABRIC |
| PD10014      | NFKB2 | cna | hetloss | BASIS    |
| PD11327      | NFKB2 | cna | homdel  | BASIS    |
| PD11742      | NFKB2 | cna | hetloss | BASIS    |
| PD22355      | NFKB2 | cna | hetloss | BASIS    |
| PD23562      | NFKB2 | cna | gain    | BASIS    |
| PD23574      | NFKB2 | cna | gain    | BASIS    |
| PD23578      | NFKB2 | cna | hetloss | BASIS    |
| PD24206      | NFKB2 | cna | homdel  | BASIS    |
| PD3890       | NFKB2 | cna | hetloss | BASIS    |
| PD3905       | NFKB2 | cna | gain    | BASIS    |
| PD4005       | NFKB2 | cna | hetloss | BASIS    |
| PD4006       | NFKB2 | cna | gain    | BASIS    |
| PD4107       | NFKB2 | cna | gain    | BASIS    |
| PD5935       | NFKB2 | cna | hetloss | BASIS    |
| PD5945       | NFKB2 | cna | amp     | BASIS    |
| PD5948       | NFKB2 | cna | gain    | BASIS    |
| PD6406       | NFKB2 | cna | hetloss | BASIS    |
| PD6731       | NFKB2 | cna | hetloss | BASIS    |
| PD7067       | NFKB2 | cna | gain    | BASIS    |
| PD7215       | NFKB2 | cna | gain    | BASIS    |
| PD8621       | NFKB2 | cna | gain    | BASIS    |
| PD8980       | NFKB2 | cna | hetloss | BASIS    |
| PD9585       | NFKB2 | cna | hetloss | BASIS    |
| PD9702       | NFKB2 | cna | gain    | BASIS    |
| TCGA-A2-A25B | NONO  | cna | gain    | TCGA     |
| TCGA-AN-A0XU | NONO  | cna | hetloss | TCGA     |
| TCGA-AO-A0JL | NONO  | cna | gain    | TCGA     |
| TCGA-BH-A0AW | NONO  | cna | gain    | TCGA     |
| TCGA-C8-A12L | NONO  | cna | hetloss | TCGA     |
| TCGA-E2-A1L7 | NONO  | cna | hetloss | TCGA     |
| TCGA-E9-A1NC | NONO  | cna | hetloss | TCGA     |
| MB-0346      | NONO  | cna | hetloss | METABRIC |
| MB-2827      | NONO  | cna | hetloss | METABRIC |
| MB-5465      | NONO  | cna | gain    | METABRIC |
| MB-6060      | NONO  | cna | hetloss | METABRIC |
| MB-0420      | NONO  | cna | hetloss | METABRIC |
| PD10014      | NONO  | cna | hetloss | BASIS    |
| PD11327      | NONO  | cna | hetloss | BASIS    |

|              |       |     |         |          |
|--------------|-------|-----|---------|----------|
| PD13296      | NONO  | cna | amp     | BASIS    |
| PD13297      | NONO  | cna | gain    | BASIS    |
| PD13299      | NONO  | cna | gain    | BASIS    |
| PD13771      | NONO  | cna | gain    | BASIS    |
| PD14442      | NONO  | cna | gain    | BASIS    |
| PD23562      | NONO  | cna | hetloss | BASIS    |
| PD23574      | NONO  | cna | gain    | BASIS    |
| PD24202      | NONO  | cna | gain    | BASIS    |
| PD24206      | NONO  | cna | gain    | BASIS    |
| PD3890       | NONO  | cna | gain    | BASIS    |
| PD3905       | NONO  | cna | gain    | BASIS    |
| PD4005       | NONO  | cna | hetloss | BASIS    |
| PD4006       | NONO  | cna | gain    | BASIS    |
| PD4107       | NONO  | cna | amp     | BASIS    |
| PD4826       | NONO  | cna | gain    | BASIS    |
| PD4967       | NONO  | cna | gain    | BASIS    |
| PD5930       | NONO  | cna | gain    | BASIS    |
| PD5935       | NONO  | cna | gain    | BASIS    |
| PD5948       | NONO  | cna | gain    | BASIS    |
| PD6406       | NONO  | cna | gain    | BASIS    |
| PD6413       | NONO  | cna | gain    | BASIS    |
| PD7067       | NONO  | cna | gain    | BASIS    |
| PD7215       | NONO  | cna | gain    | BASIS    |
| PD8621       | NONO  | cna | amp     | BASIS    |
| PD8980       | NONO  | cna | gain    | BASIS    |
| PD9004       | NONO  | cna | gain    | BASIS    |
| TCGA-A2-A25B | NT5C2 | cna | hetloss | TCGA     |
| TCGA-AN-A0XU | NT5C2 | cna | hetloss | TCGA     |
| TCGA-AO-A0JL | NT5C2 | cna | hetloss | TCGA     |
| TCGA-BH-A18R | NT5C2 | cna | gain    | TCGA     |
| TCGA-C8-A12L | NT5C2 | cna | hetloss | TCGA     |
| TCGA-D8-A27M | NT5C2 | cna | hetloss | TCGA     |
| TCGA-E2-A1L7 | NT5C2 | cna | hetloss | TCGA     |
| TCGA-LL-A5YP | NT5C2 | cna | gain    | TCGA     |
| MB-0346      | NT5C2 | cna | gain    | METABRIC |
| MB-2827      | NT5C2 | cna | hetloss | METABRIC |
| MB-5070      | NT5C2 | cna | hetloss | METABRIC |
| MB-6060      | NT5C2 | cna | hetloss | METABRIC |
| MB-6098      | NT5C2 | cna | hetloss | METABRIC |
| MB-7038      | NT5C2 | cna | hetloss | METABRIC |
| MB-7048      | NT5C2 | cna | hetloss | METABRIC |
| MB-0420      | NT5C2 | cna | hetloss | METABRIC |
| PD10014      | NT5C2 | cna | hetloss | BASIS    |
| PD11327      | NT5C2 | cna | homdel  | BASIS    |
| PD11742      | NT5C2 | cna | hetloss | BASIS    |
| PD22355      | NT5C2 | cna | hetloss | BASIS    |
| PD23562      | NT5C2 | cna | gain    | BASIS    |

|              |       |     |         |          |
|--------------|-------|-----|---------|----------|
| PD23574      | NT5C2 | cna | gain    | BASIS    |
| PD23578      | NT5C2 | cna | hetloss | BASIS    |
| PD24206      | NT5C2 | cna | homdel  | BASIS    |
| PD3890       | NT5C2 | cna | hetloss | BASIS    |
| PD3905       | NT5C2 | cna | gain    | BASIS    |
| PD4005       | NT5C2 | cna | hetloss | BASIS    |
| PD4006       | NT5C2 | cna | gain    | BASIS    |
| PD4107       | NT5C2 | cna | gain    | BASIS    |
| PD5935       | NT5C2 | cna | hetloss | BASIS    |
| PD5945       | NT5C2 | cna | gain    | BASIS    |
| PD5948       | NT5C2 | cna | gain    | BASIS    |
| PD6406       | NT5C2 | cna | hetloss | BASIS    |
| PD6731       | NT5C2 | cna | hetloss | BASIS    |
| PD7067       | NT5C2 | cna | gain    | BASIS    |
| PD7215       | NT5C2 | cna | gain    | BASIS    |
| PD8621       | NT5C2 | cna | gain    | BASIS    |
| PD8980       | NT5C2 | cna | hetloss | BASIS    |
| PD9585       | NT5C2 | cna | hetloss | BASIS    |
| PD9702       | NT5C2 | cna | gain    | BASIS    |
| TCGA-AN-A0XU | NUP93 | cna | hetloss | TCGA     |
| TCGA-AO-A0JL | NUP93 | cna | gain    | TCGA     |
| TCGA-BH-A0AW | NUP93 | cna | hetloss | TCGA     |
| TCGA-BH-A0C0 | NUP93 | cna | hetloss | TCGA     |
| TCGA-C8-A12L | NUP93 | cna | gain    | TCGA     |
| TCGA-D8-A27M | NUP93 | cna | gain    | TCGA     |
| TCGA-E2-A1L7 | NUP93 | cna | hetloss | TCGA     |
| TCGA-LL-A5YP | NUP93 | cna | gain    | TCGA     |
| MB-0346      | NUP93 | cna | gain    | METABRIC |
| MB-5070      | NUP93 | cna | hetloss | METABRIC |
| MB-5107      | NUP93 | cna | hetloss | METABRIC |
| MB-5465      | NUP93 | cna | hetloss | METABRIC |
| MB-6271      | NUP93 | cna | hetloss | METABRIC |
| MB-7032      | NUP93 | cna | gain    | METABRIC |
| MB-7048      | NUP93 | cna | hetloss | METABRIC |
| MB-0420      | NUP93 | cna | hetloss | METABRIC |
| MTS-T0064    | NUP93 | cna | hetloss | METABRIC |
| PD10014      | NUP93 | cna | hetloss | BASIS    |
| PD11327      | NUP93 | cna | hetloss | BASIS    |
| PD11742      | NUP93 | cna | hetloss | BASIS    |
| PD13296      | NUP93 | cna | hetloss | BASIS    |
| PD13297      | NUP93 | cna | hetloss | BASIS    |
| PD13299      | NUP93 | cna | gain    | BASIS    |
| PD14442      | NUP93 | cna | hetloss | BASIS    |
| PD22355      | NUP93 | cna | hetloss | BASIS    |
| PD23562      | NUP93 | cna | gain    | BASIS    |
| PD24186      | NUP93 | cna | gain    | BASIS    |
| PD24202      | NUP93 | cna | hetloss | BASIS    |



|              |         |     |         |          |
|--------------|---------|-----|---------|----------|
| PD24206      | NUP93   | cna | gain    | BASIS    |
| PD24337      | NUP93   | cna | hetloss | BASIS    |
| PD3905       | NUP93   | cna | gain    | BASIS    |
| PD4005       | NUP93   | cna | hetloss | BASIS    |
| PD4967       | NUP93   | cna | hetloss | BASIS    |
| PD5945       | NUP93   | cna | amp     | BASIS    |
| PD5948       | NUP93   | cna | hetloss | BASIS    |
| PD7067       | NUP93   | cna | hetloss | BASIS    |
| PD7215       | NUP93   | cna | gain    | BASIS    |
| PD8980       | NUP93   | cna | gain    | BASIS    |
| PD9585       | NUP93   | cna | hetloss | BASIS    |
| PD9702       | NUP93   | cna | gain    | BASIS    |
| TCGA-AN-A0XU | PDE4DIP | cna | gain    | TCGA     |
| TCGA-AO-A0JL | PDE4DIP | cna | gain    | TCGA     |
| TCGA-BH-A0AW | PDE4DIP | cna | gain    | TCGA     |
| TCGA-BH-A0C0 | PDE4DIP | cna | hetloss | TCGA     |
| TCGA-BH-A18R | PDE4DIP | cna | gain    | TCGA     |
| TCGA-BH-A1FU | PDE4DIP | cna | gain    | TCGA     |
| TCGA-C8-A12L | PDE4DIP | cna | gain    | TCGA     |
| TCGA-E2-A1L7 | PDE4DIP | cna | gain    | TCGA     |
| TCGA-EW-A10X | PDE4DIP | cna | gain    | TCGA     |
| TCGA-LL-A5YP | PDE4DIP | cna | amp     | TCGA     |
| MB-2827      | PDE4DIP | cna | amp     | METABRIC |
| MB-6098      | PDE4DIP | cna | amp     | METABRIC |
| MB-7032      | PDE4DIP | cna | gain    | METABRIC |
| MB-7038      | PDE4DIP | cna | gain    | METABRIC |
| MB-0420      | PDE4DIP | cna | hetloss | METABRIC |
| PD10014      | PDE4DIP | cna | gain    | BASIS    |
| PD11327      | PDE4DIP | cna | amp     | BASIS    |
| PD13296      | PDE4DIP | cna | gain    | BASIS    |
| PD13297      | PDE4DIP | cna | gain    | BASIS    |
| PD13299      | PDE4DIP | cna | gain    | BASIS    |
| PD14442      | PDE4DIP | cna | gain    | BASIS    |
| PD23562      | PDE4DIP | cna | gain    | BASIS    |
| PD23574      | PDE4DIP | cna | gain    | BASIS    |
| PD23578      | PDE4DIP | cna | gain    | BASIS    |
| PD24186      | PDE4DIP | cna | gain    | BASIS    |
| PD24206      | PDE4DIP | cna | gain    | BASIS    |
| PD3905       | PDE4DIP | cna | gain    | BASIS    |
| PD4006       | PDE4DIP | cna | amp     | BASIS    |
| PD4107       | PDE4DIP | cna | gain    | BASIS    |
| PD4826       | PDE4DIP | cna | gain    | BASIS    |
| PD5930       | PDE4DIP | cna | gain    | BASIS    |
| PD5935       | PDE4DIP | cna | gain    | BASIS    |
| PD5945       | PDE4DIP | cna | gain    | BASIS    |
| PD5948       | PDE4DIP | cna | gain    | BASIS    |
| PD6413       | PDE4DIP | cna | gain    | BASIS    |

|              |         |     |         |          |
|--------------|---------|-----|---------|----------|
| PD7067       | PDE4DIP | cna | amp     | BASIS    |
| PD7215       | PDE4DIP | cna | gain    | BASIS    |
| PD8621       | PDE4DIP | cna | amp     | BASIS    |
| PD9004       | PDE4DIP | cna | amp     | BASIS    |
| PD9702       | PDE4DIP | cna | gain    | BASIS    |
| TCGA-AN-A0XU | PDPK1   | cna | hetloss | TCGA     |
| TCGA-AO-A0JL | PDPK1   | cna | gain    | TCGA     |
| TCGA-BH-A0AW | PDPK1   | cna | gain    | TCGA     |
| TCGA-BH-A0C0 | PDPK1   | cna | gain    | TCGA     |
| TCGA-C8-A12L | PDPK1   | cna | gain    | TCGA     |
| TCGA-E2-A1L7 | PDPK1   | cna | hetloss | TCGA     |
| TCGA-E9-A1NC | PDPK1   | cna | hetloss | TCGA     |
| TCGA-LL-A5YP | PDPK1   | cna | gain    | TCGA     |
| MB-0346      | PDPK1   | cna | hetloss | METABRIC |
| MB-5465      | PDPK1   | cna | hetloss | METABRIC |
| MB-6271      | PDPK1   | cna | gain    | METABRIC |
| MB-7032      | PDPK1   | cna | gain    | METABRIC |
| MB-7038      | PDPK1   | cna | hetloss | METABRIC |
| PD10014      | PDPK1   | cna | gain    | BASIS    |
| PD11327      | PDPK1   | cna | gain    | BASIS    |
| PD11742      | PDPK1   | cna | gain    | BASIS    |
| PD13296      | PDPK1   | cna | gain    | BASIS    |
| PD13297      | PDPK1   | cna | hetloss | BASIS    |
| PD13299      | PDPK1   | cna | gain    | BASIS    |
| PD22355      | PDPK1   | cna | hetloss | BASIS    |
| PD23578      | PDPK1   | cna | hetloss | BASIS    |
| PD24202      | PDPK1   | cna | hetloss | BASIS    |
| PD24337      | PDPK1   | cna | hetloss | BASIS    |
| PD3905       | PDPK1   | cna | gain    | BASIS    |
| PD4005       | PDPK1   | cna | gain    | BASIS    |
| PD4006       | PDPK1   | cna | gain    | BASIS    |
| PD4107       | PDPK1   | cna | gain    | BASIS    |
| PD4826       | PDPK1   | cna | gain    | BASIS    |
| PD4967       | PDPK1   | cna | gain    | BASIS    |
| PD5930       | PDPK1   | cna | gain    | BASIS    |
| PD5935       | PDPK1   | cna | gain    | BASIS    |
| PD5945       | PDPK1   | cna | gain    | BASIS    |
| PD5948       | PDPK1   | cna | gain    | BASIS    |
| PD6413       | PDPK1   | cna | gain    | BASIS    |
| PD7067       | PDPK1   | cna | gain    | BASIS    |
| PD7215       | PDPK1   | cna | amp     | BASIS    |
| PD8621       | PDPK1   | cna | gain    | BASIS    |
| PD9004       | PDPK1   | cna | gain    | BASIS    |
| PD9585       | PDPK1   | cna | hetloss | BASIS    |
| PD9702       | PDPK1   | cna | gain    | BASIS    |
| TCGA-AO-A0JL | PDYN    | cna | gain    | TCGA     |
| TCGA-BH-A0AW | PDYN    | cna | gain    | TCGA     |

|              |        |     |         |          |
|--------------|--------|-----|---------|----------|
| TCGA-BH-A0C0 | PDYN   | cna | hetloss | TCGA     |
| TCGA-BH-A18R | PDYN   | cna | homdel  | TCGA     |
| TCGA-C8-A12L | PDYN   | cna | hetloss | TCGA     |
| TCGA-D8-A27M | PDYN   | cna | gain    | TCGA     |
| TCGA-E2-A1L7 | PDYN   | cna | gain    | TCGA     |
| TCGA-LL-A5YP | PDYN   | cna | hetloss | TCGA     |
| MB-0346      | PDYN   | cna | gain    | METABRIC |
| MB-5070      | PDYN   | cna | amp     | METABRIC |
| MB-6060      | PDYN   | cna | amp     | METABRIC |
| MB-6098      | PDYN   | cna | hetloss | METABRIC |
| MB-6271      | PDYN   | cna | hetloss | METABRIC |
| MB-7032      | PDYN   | cna | gain    | METABRIC |
| MB-7048      | PDYN   | cna | gain    | METABRIC |
| MB-0420      | PDYN   | cna | hetloss | METABRIC |
| MTS-T0064    | PDYN   | cna | gain    | METABRIC |
| PD11327      | PDYN   | cna | amp     | BASIS    |
| PD11742      | PDYN   | cna | hetloss | BASIS    |
| PD13296      | PDYN   | cna | hetloss | BASIS    |
| PD13299      | PDYN   | cna | gain    | BASIS    |
| PD22355      | PDYN   | cna | hetloss | BASIS    |
| PD23574      | PDYN   | cna | gain    | BASIS    |
| PD23578      | PDYN   | cna | hetloss | BASIS    |
| PD24186      | PDYN   | cna | amp     | BASIS    |
| PD24202      | PDYN   | cna | hetloss | BASIS    |
| PD24337      | PDYN   | cna | hetloss | BASIS    |
| PD3890       | PDYN   | cna | hetloss | BASIS    |
| PD3905       | PDYN   | cna | gain    | BASIS    |
| PD4005       | PDYN   | cna | hetloss | BASIS    |
| PD4107       | PDYN   | cna | gain    | BASIS    |
| PD4826       | PDYN   | cna | hetloss | BASIS    |
| PD5935       | PDYN   | cna | gain    | BASIS    |
| PD5945       | PDYN   | cna | amp     | BASIS    |
| PD5948       | PDYN   | cna | gain    | BASIS    |
| PD6406       | PDYN   | cna | hetloss | BASIS    |
| PD7215       | PDYN   | cna | gain    | BASIS    |
| PD8621       | PDYN   | cna | gain    | BASIS    |
| PD8980       | PDYN   | cna | hetloss | BASIS    |
| PD9702       | PDYN   | cna | gain    | BASIS    |
| TCGA-AN-A0XU | PIK3CB | cna | gain    | TCGA     |
| TCGA-BH-A0C0 | PIK3CB | cna | gain    | TCGA     |
| TCGA-BH-A18R | PIK3CB | cna | gain    | TCGA     |
| TCGA-BH-A1FU | PIK3CB | cna | hetloss | TCGA     |
| TCGA-C8-A12L | PIK3CB | cna | gain    | TCGA     |
| TCGA-E2-A1L7 | PIK3CB | cna | gain    | TCGA     |
| TCGA-E9-A1NC | PIK3CB | cna | gain    | TCGA     |
| TCGA-LL-A5YP | PIK3CB | cna | gain    | TCGA     |
| MB-0346      | PIK3CB | cna | hetloss | METABRIC |

|              |         |     |         |          |
|--------------|---------|-----|---------|----------|
| MB-5070      | PIK3CB  | cna | gain    | METABRIC |
| MB-5107      | PIK3CB  | cna | gain    | METABRIC |
| MB-5465      | PIK3CB  | cna | gain    | METABRIC |
| MB-7038      | PIK3CB  | cna | gain    | METABRIC |
| MB-7048      | PIK3CB  | cna | hetloss | METABRIC |
| MTS-T0064    | PIK3CB  | cna | amp     | METABRIC |
| PD10014      | PIK3CB  | cna | gain    | BASIS    |
| PD11327      | PIK3CB  | cna | gain    | BASIS    |
| PD13299      | PIK3CB  | cna | gain    | BASIS    |
| PD13771      | PIK3CB  | cna | hetloss | BASIS    |
| PD22355      | PIK3CB  | cna | gain    | BASIS    |
| PD23561      | PIK3CB  | cna | hetloss | BASIS    |
| PD23574      | PIK3CB  | cna | gain    | BASIS    |
| PD23578      | PIK3CB  | cna | gain    | BASIS    |
| PD24186      | PIK3CB  | cna | gain    | BASIS    |
| PD24202      | PIK3CB  | cna | gain    | BASIS    |
| PD24206      | PIK3CB  | cna | gain    | BASIS    |
| PD3905       | PIK3CB  | cna | gain    | BASIS    |
| PD4005       | PIK3CB  | cna | hetloss | BASIS    |
| PD4107       | PIK3CB  | cna | gain    | BASIS    |
| PD4826       | PIK3CB  | cna | gain    | BASIS    |
| PD5935       | PIK3CB  | cna | gain    | BASIS    |
| PD5945       | PIK3CB  | cna | gain    | BASIS    |
| PD5948       | PIK3CB  | cna | gain    | BASIS    |
| PD6731       | PIK3CB  | cna | gain    | BASIS    |
| PD7067       | PIK3CB  | cna | gain    | BASIS    |
| PD7215       | PIK3CB  | cna | gain    | BASIS    |
| PD8621       | PIK3CB  | cna | gain    | BASIS    |
| PD8980       | PIK3CB  | cna | gain    | BASIS    |
| PD9004       | PIK3CB  | cna | gain    | BASIS    |
| PD9702       | PIK3CB  | cna | gain    | BASIS    |
| TCGA-A2-A25B | POU2AF1 | cna | hetloss | TCGA     |
| TCGA-AN-A0XU | POU2AF1 | cna | gain    | TCGA     |
| TCGA-AO-A0JL | POU2AF1 | cna | hetloss | TCGA     |
| TCGA-BH-A0C0 | POU2AF1 | cna | gain    | TCGA     |
| TCGA-BH-A18R | POU2AF1 | cna | homdel  | TCGA     |
| TCGA-D8-A27M | POU2AF1 | cna | hetloss | TCGA     |
| TCGA-E2-A1L7 | POU2AF1 | cna | hetloss | TCGA     |
| TCGA-E9-A1NC | POU2AF1 | cna | hetloss | TCGA     |
| TCGA-EW-A10X | POU2AF1 | cna | homdel  | TCGA     |
| TCGA-LL-A5YP | POU2AF1 | cna | hetloss | TCGA     |
| MB-0346      | POU2AF1 | cna | hetloss | METABRIC |
| MB-5070      | POU2AF1 | cna | hetloss | METABRIC |
| MB-5107      | POU2AF1 | cna | hetloss | METABRIC |
| MB-6271      | POU2AF1 | cna | hetloss | METABRIC |
| MB-7032      | POU2AF1 | cna | hetloss | METABRIC |
| MB-7048      | POU2AF1 | cna | hetloss | METABRIC |

|              |         |     |         |          |
|--------------|---------|-----|---------|----------|
| PD11327      | POU2AF1 | cna | gain    | BASIS    |
| PD11742      | POU2AF1 | cna | hetloss | BASIS    |
| PD13296      | POU2AF1 | cna | hetloss | BASIS    |
| PD13299      | POU2AF1 | cna | gain    | BASIS    |
| PD13771      | POU2AF1 | cna | hetloss | BASIS    |
| PD22355      | POU2AF1 | cna | hetloss | BASIS    |
| PD23574      | POU2AF1 | cna | gain    | BASIS    |
| PD23578      | POU2AF1 | cna | hetloss | BASIS    |
| PD24186      | POU2AF1 | cna | gain    | BASIS    |
| PD24206      | POU2AF1 | cna | gain    | BASIS    |
| PD24337      | POU2AF1 | cna | hetloss | BASIS    |
| PD3905       | POU2AF1 | cna | gain    | BASIS    |
| PD4005       | POU2AF1 | cna | hetloss | BASIS    |
| PD4826       | POU2AF1 | cna | hetloss | BASIS    |
| PD5935       | POU2AF1 | cna | gain    | BASIS    |
| PD5945       | POU2AF1 | cna | gain    | BASIS    |
| PD5948       | POU2AF1 | cna | gain    | BASIS    |
| PD6413       | POU2AF1 | cna | hetloss | BASIS    |
| PD6731       | POU2AF1 | cna | hetloss | BASIS    |
| PD7067       | POU2AF1 | cna | gain    | BASIS    |
| PD7215       | POU2AF1 | cna | gain    | BASIS    |
| PD9004       | POU2AF1 | cna | hetloss | BASIS    |
| PD9585       | POU2AF1 | cna | gain    | BASIS    |
| PD9702       | POU2AF1 | cna | gain    | BASIS    |
| TCGA-A2-A25B | PTPN11  | cna | gain    | TCGA     |
| TCGA-AN-A0XU | PTPN11  | cna | hetloss | TCGA     |
| TCGA-AO-A0JL | PTPN11  | cna | hetloss | TCGA     |
| TCGA-BH-A0C0 | PTPN11  | cna | gain    | TCGA     |
| TCGA-BH-A18R | PTPN11  | cna | gain    | TCGA     |
| TCGA-BH-A1FU | PTPN11  | cna | hetloss | TCGA     |
| TCGA-C8-A12L | PTPN11  | cna | gain    | TCGA     |
| TCGA-D8-A27M | PTPN11  | cna | hetloss | TCGA     |
| TCGA-E2-A1L7 | PTPN11  | cna | gain    | TCGA     |
| TCGA-LL-A5YP | PTPN11  | cna | hetloss | TCGA     |
| MB-0346      | PTPN11  | cna | gain    | METABRIC |
| MB-2827      | PTPN11  | cna | hetloss | METABRIC |
| MB-5070      | PTPN11  | cna | hetloss | METABRIC |
| MB-5465      | PTPN11  | cna | hetloss | METABRIC |
| MB-6098      | PTPN11  | cna | hetloss | METABRIC |
| MB-7048      | PTPN11  | cna | hetloss | METABRIC |
| PD10014      | PTPN11  | cna | gain    | BASIS    |
| PD11327      | PTPN11  | cna | hetloss | BASIS    |
| PD11742      | PTPN11  | cna | hetloss | BASIS    |
| PD13296      | PTPN11  | cna | hetloss | BASIS    |
| PD13297      | PTPN11  | cna | gain    | BASIS    |
| PD22355      | PTPN11  | cna | hetloss | BASIS    |
| PD23574      | PTPN11  | cna | gain    | BASIS    |

|                   |        |     |         |            |
|-------------------|--------|-----|---------|------------|
| PD23578           | PTPN11 | cna | hetloss | BASIS      |
| PD3890            | PTPN11 | cna | hetloss | BASIS      |
| PD3905            | PTPN11 | cna | gain    | BASIS      |
| PD4005            | PTPN11 | cna | hetloss | BASIS      |
| PD4006            | PTPN11 | cna | gain    | BASIS      |
| PD4107            | PTPN11 | cna | gain    | BASIS      |
| PD4826            | PTPN11 | cna | gain    | BASIS      |
| PD4967            | PTPN11 | cna | hetloss | BASIS      |
| PD5945            | PTPN11 | cna | gain    | BASIS      |
| PD5948            | PTPN11 | cna | gain    | BASIS      |
| PD6406            | PTPN11 | cna | hetloss | BASIS      |
| PD6413            | PTPN11 | cna | hetloss | BASIS      |
| PD6731            | PTPN11 | cna | hetloss | BASIS      |
| PD7067            | PTPN11 | cna | gain    | BASIS      |
| PD9004            | PTPN11 | cna | hetloss | BASIS      |
| PD9585            | PTPN11 | cna | hetloss | BASIS      |
| PD9702            | PTPN11 | cna | gain    | BASIS      |
| TCGA-A2-A25B      | RHEB   | cna | gain    | TCGA       |
| TCGA-AN-A0XU      | RHEB   | cna | hetloss | TCGA       |
| TCGA-AO-A0JL      | RHEB   | cna | gain    | TCGA       |
| TCGA-C8-A12L      | RHEB   | cna | hetloss | TCGA       |
| TCGA-D8-A27M      | RHEB   | cna | gain    | TCGA       |
| TCGA-E2-A1L7      | RHEB   | cna | hetloss | TCGA       |
| TCGA-E9-A1NC      | RHEB   | cna | hetloss | TCGA       |
| TCGA-LL-A5YP      | RHEB   | cna | hetloss | TCGA       |
| MB-0346           | RHEB   | cna | hetloss | METABRIC   |
| MB-5070           | RHEB   | cna | hetloss | METABRIC   |
| MB-6098           | RHEB   | cna | gain    | METABRIC   |
| MB-7038           | RHEB   | cna | gain    | METABRIC   |
| MB-7048           | RHEB   | cna | gain    | METABRIC   |
| MB-0420           | RHEB   | cna | hetloss | METABRIC   |
| MTS-T0064         | RHEB   | cna | amp     | METABRIC   |
| P-0009557-T01-IM5 | RHEB   | cna | homdel  | MSK-IMPACT |
| PD10014           | RHEB   | cna | gain    | BASIS      |
| PD13296           | RHEB   | cna | hetloss | BASIS      |
| PD13297           | RHEB   | cna | gain    | BASIS      |
| PD22355           | RHEB   | cna | hetloss | BASIS      |
| PD23562           | RHEB   | cna | gain    | BASIS      |
| PD23574           | RHEB   | cna | gain    | BASIS      |
| PD23578           | RHEB   | cna | hetloss | BASIS      |
| PD24186           | RHEB   | cna | gain    | BASIS      |
| PD24202           | RHEB   | cna | gain    | BASIS      |
| PD24337           | RHEB   | cna | gain    | BASIS      |
| PD3890            | RHEB   | cna | hetloss | BASIS      |
| PD3905            | RHEB   | cna | gain    | BASIS      |
| PD4006            | RHEB   | cna | amp     | BASIS      |
| PD4107            | RHEB   | cna | gain    | BASIS      |

|              |       |     |         |          |
|--------------|-------|-----|---------|----------|
| PD5930       | RHEB  | cna | gain    | BASIS    |
| PD5945       | RHEB  | cna | amp     | BASIS    |
| PD5948       | RHEB  | cna | gain    | BASIS    |
| PD6406       | RHEB  | cna | gain    | BASIS    |
| PD6731       | RHEB  | cna | hetloss | BASIS    |
| PD7067       | RHEB  | cna | gain    | BASIS    |
| PD7215       | RHEB  | cna | gain    | BASIS    |
| PD9004       | RHEB  | cna | gain    | BASIS    |
| PD9585       | RHEB  | cna | hetloss | BASIS    |
| PD9702       | RHEB  | cna | gain    | BASIS    |
| TCGA-A2-A25B | RSPO3 | cna | hetloss | TCGA     |
| TCGA-AN-A0XU | RSPO3 | cna | amp     | TCGA     |
| TCGA-AO-A0JL | RSPO3 | cna | hetloss | TCGA     |
| TCGA-BH-A0AW | RSPO3 | cna | amp     | TCGA     |
| TCGA-BH-A18R | RSPO3 | cna | gain    | TCGA     |
| TCGA-C8-A12L | RSPO3 | cna | gain    | TCGA     |
| TCGA-D8-A27M | RSPO3 | cna | gain    | TCGA     |
| MB-2827      | RSPO3 | cna | amp     | METABRIC |
| MB-5070      | RSPO3 | cna | gain    | METABRIC |
| MB-7032      | RSPO3 | cna | hetloss | METABRIC |
| MB-7038      | RSPO3 | cna | gain    | METABRIC |
| MB-7048      | RSPO3 | cna | hetloss | METABRIC |
| MB-0420      | RSPO3 | cna | hetloss | METABRIC |
| MTS-T0064    | RSPO3 | cna | amp     | METABRIC |
| PD11327      | RSPO3 | cna | gain    | BASIS    |
| PD13296      | RSPO3 | cna | gain    | BASIS    |
| PD13299      | RSPO3 | cna | gain    | BASIS    |
| PD13771      | RSPO3 | cna | hetloss | BASIS    |
| PD22355      | RSPO3 | cna | gain    | BASIS    |
| PD23562      | RSPO3 | cna | gain    | BASIS    |
| PD23574      | RSPO3 | cna | gain    | BASIS    |
| PD23578      | RSPO3 | cna | hetloss | BASIS    |
| PD24186      | RSPO3 | cna | gain    | BASIS    |
| PD24206      | RSPO3 | cna | gain    | BASIS    |
| PD24337      | RSPO3 | cna | hetloss | BASIS    |
| PD3905       | RSPO3 | cna | gain    | BASIS    |
| PD4006       | RSPO3 | cna | gain    | BASIS    |
| PD4107       | RSPO3 | cna | gain    | BASIS    |
| PD4826       | RSPO3 | cna | gain    | BASIS    |
| PD5935       | RSPO3 | cna | gain    | BASIS    |
| PD5945       | RSPO3 | cna | amp     | BASIS    |
| PD6406       | RSPO3 | cna | hetloss | BASIS    |
| PD6731       | RSPO3 | cna | hetloss | BASIS    |
| PD7067       | RSPO3 | cna | amp     | BASIS    |
| PD7215       | RSPO3 | cna | gain    | BASIS    |
| PD8621       | RSPO3 | cna | gain    | BASIS    |
| PD8980       | RSPO3 | cna | gain    | BASIS    |

|              |         |     |         |          |
|--------------|---------|-----|---------|----------|
| PD9004       | RSPO3   | cna | gain    | BASIS    |
| PD9585       | RSPO3   | cna | hetloss | BASIS    |
| PD9702       | RSPO3   | cna | gain    | BASIS    |
| TCGA-A2-A25B | SFPQ    | cna | hetloss | TCGA     |
| TCGA-AN-A0XU | SFPQ    | cna | hetloss | TCGA     |
| TCGA-AO-A0JL | SFPQ    | cna | hetloss | TCGA     |
| TCGA-BH-A0AW | SFPQ    | cna | gain    | TCGA     |
| TCGA-BH-A0C0 | SFPQ    | cna | gain    | TCGA     |
| TCGA-BH-A18R | SFPQ    | cna | homdel  | TCGA     |
| TCGA-BH-A1FU | SFPQ    | cna | gain    | TCGA     |
| TCGA-C8-A12L | SFPQ    | cna | hetloss | TCGA     |
| TCGA-D8-A27M | SFPQ    | cna | gain    | TCGA     |
| TCGA-E2-A1L7 | SFPQ    | cna | gain    | TCGA     |
| TCGA-LL-A5YP | SFPQ    | cna | gain    | TCGA     |
| MB-0346      | SFPQ    | cna | hetloss | METABRIC |
| MB-2827      | SFPQ    | cna | hetloss | METABRIC |
| MB-5070      | SFPQ    | cna | hetloss | METABRIC |
| MB-5465      | SFPQ    | cna | hetloss | METABRIC |
| MB-6060      | SFPQ    | cna | hetloss | METABRIC |
| MB-6098      | SFPQ    | cna | hetloss | METABRIC |
| MB-7038      | SFPQ    | cna | gain    | METABRIC |
| MB-0420      | SFPQ    | cna | hetloss | METABRIC |
| PD10014      | SFPQ    | cna | gain    | BASIS    |
| PD11742      | SFPQ    | cna | hetloss | BASIS    |
| PD13296      | SFPQ    | cna | gain    | BASIS    |
| PD13297      | SFPQ    | cna | gain    | BASIS    |
| PD13771      | SFPQ    | cna | gain    | BASIS    |
| PD23562      | SFPQ    | cna | gain    | BASIS    |
| PD24186      | SFPQ    | cna | gain    | BASIS    |
| PD24206      | SFPQ    | cna | hetloss | BASIS    |
| PD24337      | SFPQ    | cna | hetloss | BASIS    |
| PD3890       | SFPQ    | cna | hetloss | BASIS    |
| PD3905       | SFPQ    | cna | gain    | BASIS    |
| PD4006       | SFPQ    | cna | gain    | BASIS    |
| PD4826       | SFPQ    | cna | gain    | BASIS    |
| PD5935       | SFPQ    | cna | gain    | BASIS    |
| PD5945       | SFPQ    | cna | amp     | BASIS    |
| PD7067       | SFPQ    | cna | gain    | BASIS    |
| PD7215       | SFPQ    | cna | gain    | BASIS    |
| PD8980       | SFPQ    | cna | gain    | BASIS    |
| PD9004       | SFPQ    | cna | hetloss | BASIS    |
| PD9585       | SFPQ    | cna | hetloss | BASIS    |
| PD9702       | SFPQ    | cna | gain    | BASIS    |
| TCGA-A2-A25B | SLC34A2 | cna | hetloss | TCGA     |
| TCGA-AN-A0XU | SLC34A2 | cna | hetloss | TCGA     |
| TCGA-AO-A0JL | SLC34A2 | cna | homdel  | TCGA     |
| TCGA-BH-A0AW | SLC34A2 | cna | hetloss | TCGA     |



|              |         |     |         |          |
|--------------|---------|-----|---------|----------|
| TCGA-BH-A0C0 | SLC34A2 | cna | hetloss | TCGA     |
| TCGA-BH-A1FU | SLC34A2 | cna | homdel  | TCGA     |
| TCGA-C8-A12L | SLC34A2 | cna | hetloss | TCGA     |
| TCGA-D8-A27M | SLC34A2 | cna | gain    | TCGA     |
| TCGA-E2-A1L7 | SLC34A2 | cna | hetloss | TCGA     |
| TCGA-E9-A1NC | SLC34A2 | cna | hetloss | TCGA     |
| TCGA-LL-A5YP | SLC34A2 | cna | hetloss | TCGA     |
| MB-0346      | SLC34A2 | cna | hetloss | METABRIC |
| MB-2827      | SLC34A2 | cna | hetloss | METABRIC |
| MB-5070      | SLC34A2 | cna | hetloss | METABRIC |
| MB-5107      | SLC34A2 | cna | hetloss | METABRIC |
| MB-5465      | SLC34A2 | cna | hetloss | METABRIC |
| MB-6060      | SLC34A2 | cna | hetloss | METABRIC |
| MB-6098      | SLC34A2 | cna | hetloss | METABRIC |
| MB-0420      | SLC34A2 | cna | hetloss | METABRIC |
| PD10014      | SLC34A2 | cna | hetloss | BASIS    |
| PD11327      | SLC34A2 | cna | homdel  | BASIS    |
| PD13297      | SLC34A2 | cna | hetloss | BASIS    |
| PD22355      | SLC34A2 | cna | hetloss | BASIS    |
| PD24186      | SLC34A2 | cna | gain    | BASIS    |
| PD24202      | SLC34A2 | cna | hetloss | BASIS    |
| PD24206      | SLC34A2 | cna | hetloss | BASIS    |
| PD3890       | SLC34A2 | cna | hetloss | BASIS    |
| PD3905       | SLC34A2 | cna | gain    | BASIS    |
| PD4005       | SLC34A2 | cna | hetloss | BASIS    |
| PD4006       | SLC34A2 | cna | hetloss | BASIS    |
| PD4107       | SLC34A2 | cna | hetloss | BASIS    |
| PD4826       | SLC34A2 | cna | hetloss | BASIS    |
| PD5930       | SLC34A2 | cna | hetloss | BASIS    |
| PD5945       | SLC34A2 | cna | gain    | BASIS    |
| PD6406       | SLC34A2 | cna | hetloss | BASIS    |
| PD6413       | SLC34A2 | cna | hetloss | BASIS    |
| PD7067       | SLC34A2 | cna | gain    | BASIS    |
| PD8621       | SLC34A2 | cna | gain    | BASIS    |
| PD8980       | SLC34A2 | cna | homdel  | BASIS    |
| PD9585       | SLC34A2 | cna | hetloss | BASIS    |
| TCGA-A2-A25B | SOX9    | cna | gain    | TCGA     |
| TCGA-AN-A0XU | SOX9    | cna | gain    | TCGA     |
| TCGA-AO-A0JL | SOX9    | cna | hetloss | TCGA     |
| TCGA-BH-A0AW | SOX9    | cna | amp     | TCGA     |
| TCGA-BH-A0C0 | SOX9    | cna | gain    | TCGA     |
| TCGA-BH-A18R | SOX9    | cna | amp     | TCGA     |
| TCGA-C8-A12L | SOX9    | cna | gain    | TCGA     |
| TCGA-D8-A27M | SOX9    | cna | gain    | TCGA     |
| TCGA-E2-A1L7 | SOX9    | cna | gain    | TCGA     |
| TCGA-LL-A5YP | SOX9    | cna | amp     | TCGA     |
| MB-0346      | SOX9    | cna | gain    | METABRIC |

|              |      |     |         |          |
|--------------|------|-----|---------|----------|
| MB-5070      | SOX9 | cna | gain    | METABRIC |
| MB-5107      | SOX9 | cna | amp     | METABRIC |
| MB-6098      | SOX9 | cna | gain    | METABRIC |
| MB-6271      | SOX9 | cna | hetloss | METABRIC |
| MTS-T0064    | SOX9 | cna | gain    | METABRIC |
| PD11327      | SOX9 | cna | amp     | BASIS    |
| PD11742      | SOX9 | cna | gain    | BASIS    |
| PD23561      | SOX9 | cna | gain    | BASIS    |
| PD23562      | SOX9 | cna | gain    | BASIS    |
| PD23574      | SOX9 | cna | gain    | BASIS    |
| PD24186      | SOX9 | cna | gain    | BASIS    |
| PD24202      | SOX9 | cna | gain    | BASIS    |
| PD24206      | SOX9 | cna | hetloss | BASIS    |
| PD3890       | SOX9 | cna | gain    | BASIS    |
| PD3905       | SOX9 | cna | gain    | BASIS    |
| PD4006       | SOX9 | cna | gain    | BASIS    |
| PD4107       | SOX9 | cna | gain    | BASIS    |
| PD4826       | SOX9 | cna | hetloss | BASIS    |
| PD4967       | SOX9 | cna | hetloss | BASIS    |
| PD5930       | SOX9 | cna | gain    | BASIS    |
| PD5935       | SOX9 | cna | gain    | BASIS    |
| PD5945       | SOX9 | cna | amp     | BASIS    |
| PD5948       | SOX9 | cna | gain    | BASIS    |
| PD6731       | SOX9 | cna | hetloss | BASIS    |
| PD7067       | SOX9 | cna | gain    | BASIS    |
| PD7215       | SOX9 | cna | gain    | BASIS    |
| PD9004       | SOX9 | cna | gain    | BASIS    |
| PD9585       | SOX9 | cna | gain    | BASIS    |
| PD9702       | SOX9 | cna | gain    | BASIS    |
| TCGA-A2-A25B | SUFU | cna | hetloss | TCGA     |
| TCGA-AN-A0XU | SUFU | cna | hetloss | TCGA     |
| TCGA-AO-A0JL | SUFU | cna | hetloss | TCGA     |
| TCGA-BH-A18R | SUFU | cna | gain    | TCGA     |
| TCGA-C8-A12L | SUFU | cna | hetloss | TCGA     |
| TCGA-D8-A27M | SUFU | cna | hetloss | TCGA     |
| TCGA-E2-A1L7 | SUFU | cna | hetloss | TCGA     |
| TCGA-LL-A5YP | SUFU | cna | gain    | TCGA     |
| MB-0346      | SUFU | cna | gain    | METABRIC |
| MB-2827      | SUFU | cna | hetloss | METABRIC |
| MB-5070      | SUFU | cna | hetloss | METABRIC |
| MB-6060      | SUFU | cna | hetloss | METABRIC |
| MB-6098      | SUFU | cna | hetloss | METABRIC |
| MB-7038      | SUFU | cna | hetloss | METABRIC |
| MB-7048      | SUFU | cna | hetloss | METABRIC |
| MB-0420      | SUFU | cna | hetloss | METABRIC |
| PD10014      | SUFU | cna | hetloss | BASIS    |
| PD11327      | SUFU | cna | homdel  | BASIS    |

|              |         |     |         |          |
|--------------|---------|-----|---------|----------|
| PD11742      | SUFU    | cna | hetloss | BASIS    |
| PD22355      | SUFU    | cna | hetloss | BASIS    |
| PD23562      | SUFU    | cna | gain    | BASIS    |
| PD23574      | SUFU    | cna | gain    | BASIS    |
| PD23578      | SUFU    | cna | hetloss | BASIS    |
| PD24206      | SUFU    | cna | homdel  | BASIS    |
| PD3890       | SUFU    | cna | hetloss | BASIS    |
| PD3905       | SUFU    | cna | gain    | BASIS    |
| PD4005       | SUFU    | cna | hetloss | BASIS    |
| PD4006       | SUFU    | cna | gain    | BASIS    |
| PD4107       | SUFU    | cna | gain    | BASIS    |
| PD5935       | SUFU    | cna | hetloss | BASIS    |
| PD5945       | SUFU    | cna | gain    | BASIS    |
| PD5948       | SUFU    | cna | gain    | BASIS    |
| PD6406       | SUFU    | cna | hetloss | BASIS    |
| PD6731       | SUFU    | cna | hetloss | BASIS    |
| PD7067       | SUFU    | cna | gain    | BASIS    |
| PD7215       | SUFU    | cna | gain    | BASIS    |
| PD8621       | SUFU    | cna | gain    | BASIS    |
| PD8980       | SUFU    | cna | hetloss | BASIS    |
| PD9585       | SUFU    | cna | hetloss | BASIS    |
| PD9702       | SUFU    | cna | gain    | BASIS    |
| TCGA-A2-A25B | TBL1XR1 | cna | gain    | TCGA     |
| TCGA-AN-A0XU | TBL1XR1 | cna | gain    | TCGA     |
| TCGA-BH-A0AW | TBL1XR1 | cna | gain    | TCGA     |
| TCGA-BH-A0C0 | TBL1XR1 | cna | gain    | TCGA     |
| TCGA-BH-A1FU | TBL1XR1 | cna | hetloss | TCGA     |
| TCGA-C8-A12L | TBL1XR1 | cna | amp     | TCGA     |
| TCGA-E2-A1L7 | TBL1XR1 | cna | gain    | TCGA     |
| TCGA-LL-A5YP | TBL1XR1 | cna | gain    | TCGA     |
| MB-0346      | TBL1XR1 | cna | gain    | METABRIC |
| MB-5070      | TBL1XR1 | cna | amp     | METABRIC |
| MB-5107      | TBL1XR1 | cna | amp     | METABRIC |
| MB-6060      | TBL1XR1 | cna | gain    | METABRIC |
| MB-7038      | TBL1XR1 | cna | hetloss | METABRIC |
| MB-0420      | TBL1XR1 | cna | amp     | METABRIC |
| MTS-T0064    | TBL1XR1 | cna | amp     | METABRIC |
| PD11327      | TBL1XR1 | cna | amp     | BASIS    |
| PD13296      | TBL1XR1 | cna | amp     | BASIS    |
| PD13299      | TBL1XR1 | cna | gain    | BASIS    |
| PD13771      | TBL1XR1 | cna | hetloss | BASIS    |
| PD22355      | TBL1XR1 | cna | gain    | BASIS    |
| PD23561      | TBL1XR1 | cna | hetloss | BASIS    |
| PD23562      | TBL1XR1 | cna | amp     | BASIS    |
| PD23574      | TBL1XR1 | cna | gain    | BASIS    |
| PD23578      | TBL1XR1 | cna | gain    | BASIS    |
| PD24186      | TBL1XR1 | cna | amp     | BASIS    |

|              |         |     |         |          |
|--------------|---------|-----|---------|----------|
| PD24202      | TBL1XR1 | cna | gain    | BASIS    |
| PD24206      | TBL1XR1 | cna | gain    | BASIS    |
| PD3905       | TBL1XR1 | cna | gain    | BASIS    |
| PD4005       | TBL1XR1 | cna | amp     | BASIS    |
| PD4107       | TBL1XR1 | cna | gain    | BASIS    |
| PD4826       | TBL1XR1 | cna | gain    | BASIS    |
| PD5935       | TBL1XR1 | cna | amp     | BASIS    |
| PD5945       | TBL1XR1 | cna | amp     | BASIS    |
| PD5948       | TBL1XR1 | cna | gain    | BASIS    |
| PD6406       | TBL1XR1 | cna | gain    | BASIS    |
| PD7067       | TBL1XR1 | cna | gain    | BASIS    |
| PD7215       | TBL1XR1 | cna | gain    | BASIS    |
| PD8621       | TBL1XR1 | cna | gain    | BASIS    |
| PD8980       | TBL1XR1 | cna | gain    | BASIS    |
| PD9702       | TBL1XR1 | cna | amp     | BASIS    |
| TCGA-A2-A25B | TET2    | cna | hetloss | TCGA     |
| TCGA-AN-A0XU | TET2    | cna | hetloss | TCGA     |
| TCGA-BH-A0AW | TET2    | cna | hetloss | TCGA     |
| TCGA-BH-A0C0 | TET2    | cna | hetloss | TCGA     |
| TCGA-BH-A1FU | TET2    | cna | gain    | TCGA     |
| TCGA-C8-A12L | TET2    | cna | hetloss | TCGA     |
| TCGA-D8-A27M | TET2    | cna | hetloss | TCGA     |
| TCGA-E2-A1L7 | TET2    | cna | hetloss | TCGA     |
| TCGA-E9-A1NC | TET2    | cna | hetloss | TCGA     |
| TCGA-LL-A5YP | TET2    | cna | gain    | TCGA     |
| MB-2827      | TET2    | cna | hetloss | METABRIC |
| MB-5070      | TET2    | cna | hetloss | METABRIC |
| MB-5465      | TET2    | cna | hetloss | METABRIC |
| MB-7048      | TET2    | cna | hetloss | METABRIC |
| MB-0420      | TET2    | cna | hetloss | METABRIC |
| PD10014      | TET2    | cna | gain    | BASIS    |
| PD11742      | TET2    | cna | hetloss | BASIS    |
| PD13296      | TET2    | cna | hetloss | BASIS    |
| PD13297      | TET2    | cna | hetloss | BASIS    |
| PD22355      | TET2    | cna | hetloss | BASIS    |
| PD23562      | TET2    | cna | gain    | BASIS    |
| PD23578      | TET2    | cna | hetloss | BASIS    |
| PD24202      | TET2    | cna | hetloss | BASIS    |
| PD24206      | TET2    | cna | gain    | BASIS    |
| PD24337      | TET2    | cna | hetloss | BASIS    |
| PD3890       | TET2    | cna | gain    | BASIS    |
| PD3905       | TET2    | cna | gain    | BASIS    |
| PD4006       | TET2    | cna | hetloss | BASIS    |
| PD4107       | TET2    | cna | gain    | BASIS    |
| PD4826       | TET2    | cna | gain    | BASIS    |
| PD5930       | TET2    | cna | hetloss | BASIS    |
| PD5935       | TET2    | cna | gain    | BASIS    |

|              |          |     |         |          |
|--------------|----------|-----|---------|----------|
| PD5945       | TET2     | cna | gain    | BASIS    |
| PD5948       | TET2     | cna | gain    | BASIS    |
| PD6406       | TET2     | cna | hetloss | BASIS    |
| PD7067       | TET2     | cna | gain    | BASIS    |
| PD7215       | TET2     | cna | gain    | BASIS    |
| PD8621       | TET2     | cna | hetloss | BASIS    |
| PD8980       | TET2     | cna | hetloss | BASIS    |
| PD9585       | TET2     | cna | hetloss | BASIS    |
| TCGA-A2-A25B | TNFRSF14 | cna | hetloss | TCGA     |
| TCGA-AN-A0XU | TNFRSF14 | cna | hetloss | TCGA     |
| TCGA-AO-A0JL | TNFRSF14 | cna | hetloss | TCGA     |
| TCGA-BH-A0AW | TNFRSF14 | cna | gain    | TCGA     |
| TCGA-BH-A0C0 | TNFRSF14 | cna | gain    | TCGA     |
| TCGA-BH-A18R | TNFRSF14 | cna | homdel  | TCGA     |
| TCGA-BH-A1FU | TNFRSF14 | cna | gain    | TCGA     |
| TCGA-C8-A12L | TNFRSF14 | cna | hetloss | TCGA     |
| TCGA-D8-A27M | TNFRSF14 | cna | gain    | TCGA     |
| TCGA-E2-A1L7 | TNFRSF14 | cna | hetloss | TCGA     |
| TCGA-E9-A1NC | TNFRSF14 | cna | hetloss | TCGA     |
| TCGA-LL-A5YP | TNFRSF14 | cna | amp     | TCGA     |
| MB-2827      | TNFRSF14 | cna | hetloss | METABRIC |
| MB-5070      | TNFRSF14 | cna | hetloss | METABRIC |
| MB-5465      | TNFRSF14 | cna | hetloss | METABRIC |
| MB-6098      | TNFRSF14 | cna | hetloss | METABRIC |
| MB-0420      | TNFRSF14 | cna | hetloss | METABRIC |
| PD10014      | TNFRSF14 | cna | gain    | BASIS    |
| PD11327      | TNFRSF14 | cna | gain    | BASIS    |
| PD11742      | TNFRSF14 | cna | hetloss | BASIS    |
| PD13297      | TNFRSF14 | cna | gain    | BASIS    |
| PD22355      | TNFRSF14 | cna | hetloss | BASIS    |
| PD23578      | TNFRSF14 | cna | hetloss | BASIS    |
| PD24186      | TNFRSF14 | cna | gain    | BASIS    |
| PD24202      | TNFRSF14 | cna | hetloss | BASIS    |
| PD24206      | TNFRSF14 | cna | gain    | BASIS    |
| PD24337      | TNFRSF14 | cna | hetloss | BASIS    |
| PD3890       | TNFRSF14 | cna | hetloss | BASIS    |
| PD3905       | TNFRSF14 | cna | gain    | BASIS    |
| PD4005       | TNFRSF14 | cna | gain    | BASIS    |
| PD4107       | TNFRSF14 | cna | gain    | BASIS    |
| PD4826       | TNFRSF14 | cna | gain    | BASIS    |
| PD5935       | TNFRSF14 | cna | gain    | BASIS    |
| PD5945       | TNFRSF14 | cna | gain    | BASIS    |
| PD6406       | TNFRSF14 | cna | hetloss | BASIS    |
| PD7067       | TNFRSF14 | cna | gain    | BASIS    |
| PD7215       | TNFRSF14 | cna | gain    | BASIS    |
| PD8621       | TNFRSF14 | cna | gain    | BASIS    |
| PD8980       | TNFRSF14 | cna | hetloss | BASIS    |

|                   |          |     |         |            |
|-------------------|----------|-----|---------|------------|
| PD9004            | TNFRSF14 | cna | hetloss | BASIS      |
| TCGA-A2-A25B      | TP63     | cna | amp     | TCGA       |
| TCGA-AN-A0XU      | TP63     | cna | gain    | TCGA       |
| TCGA-BH-A0AW      | TP63     | cna | gain    | TCGA       |
| TCGA-BH-A0C0      | TP63     | cna | gain    | TCGA       |
| TCGA-BH-A1FU      | TP63     | cna | hetloss | TCGA       |
| TCGA-C8-A12L      | TP63     | cna | gain    | TCGA       |
| TCGA-LL-A5YP      | TP63     | cna | gain    | TCGA       |
| MB-0346           | TP63     | cna | gain    | METABRIC   |
| MB-5070           | TP63     | cna | hetloss | METABRIC   |
| MB-5107           | TP63     | cna | amp     | METABRIC   |
| MB-5465           | TP63     | cna | gain    | METABRIC   |
| MB-6060           | TP63     | cna | gain    | METABRIC   |
| MB-6098           | TP63     | cna | gain    | METABRIC   |
| MB-7038           | TP63     | cna | hetloss | METABRIC   |
| MTS-T0064         | TP63     | cna | amp     | METABRIC   |
| P-0002858-T01-IM3 | TP63     | cna | amp     | MSK-IMPACT |
| PD11327           | TP63     | cna | gain    | BASIS      |
| PD13299           | TP63     | cna | gain    | BASIS      |
| PD13771           | TP63     | cna | hetloss | BASIS      |
| PD22355           | TP63     | cna | gain    | BASIS      |
| PD23561           | TP63     | cna | hetloss | BASIS      |
| PD23562           | TP63     | cna | gain    | BASIS      |
| PD23578           | TP63     | cna | gain    | BASIS      |
| PD24186           | TP63     | cna | amp     | BASIS      |
| PD24202           | TP63     | cna | gain    | BASIS      |
| PD3905            | TP63     | cna | gain    | BASIS      |
| PD4005            | TP63     | cna | gain    | BASIS      |
| PD4107            | TP63     | cna | gain    | BASIS      |
| PD4826            | TP63     | cna | gain    | BASIS      |
| PD5930            | TP63     | cna | gain    | BASIS      |
| PD5945            | TP63     | cna | amp     | BASIS      |
| PD5948            | TP63     | cna | gain    | BASIS      |
| PD6406            | TP63     | cna | gain    | BASIS      |
| PD6731            | TP63     | cna | gain    | BASIS      |
| PD7067            | TP63     | cna | gain    | BASIS      |
| PD7215            | TP63     | cna | gain    | BASIS      |
| PD8621            | TP63     | cna | gain    | BASIS      |
| PD8980            | TP63     | cna | gain    | BASIS      |
| PD9004            | TP63     | cna | gain    | BASIS      |
| PD9702            | TP63     | cna | amp     | BASIS      |
| TCGA-A2-A25B      | TRIP11   | cna | hetloss | TCGA       |
| TCGA-AO-A0JL      | TRIP11   | cna | hetloss | TCGA       |
| TCGA-BH-A0AW      | TRIP11   | cna | hetloss | TCGA       |
| TCGA-BH-A1FU      | TRIP11   | cna | gain    | TCGA       |
| TCGA-C8-A12L      | TRIP11   | cna | gain    | TCGA       |
| TCGA-D8-A27M      | TRIP11   | cna | hetloss | TCGA       |

|              |        |     |         |          |
|--------------|--------|-----|---------|----------|
| TCGA-E2-A1L7 | TRIP11 | cna | gain    | TCGA     |
| TCGA-E9-A1NC | TRIP11 | cna | hetloss | TCGA     |
| TCGA-LL-A5YP | TRIP11 | cna | hetloss | TCGA     |
| MB-0346      | TRIP11 | cna | gain    | METABRIC |
| MB-2827      | TRIP11 | cna | hetloss | METABRIC |
| MB-5070      | TRIP11 | cna | hetloss | METABRIC |
| MB-5107      | TRIP11 | cna | hetloss | METABRIC |
| MB-6098      | TRIP11 | cna | hetloss | METABRIC |
| MTS-T0064    | TRIP11 | cna | hetloss | METABRIC |
| PD10014      | TRIP11 | cna | hetloss | BASIS    |
| PD11327      | TRIP11 | cna | hetloss | BASIS    |
| PD11742      | TRIP11 | cna | hetloss | BASIS    |
| PD13296      | TRIP11 | cna | gain    | BASIS    |
| PD13297      | TRIP11 | cna | hetloss | BASIS    |
| PD13771      | TRIP11 | cna | hetloss | BASIS    |
| PD23562      | TRIP11 | cna | gain    | BASIS    |
| PD23574      | TRIP11 | cna | gain    | BASIS    |
| PD23578      | TRIP11 | cna | hetloss | BASIS    |
| PD24202      | TRIP11 | cna | hetloss | BASIS    |
| PD24206      | TRIP11 | cna | gain    | BASIS    |
| PD24337      | TRIP11 | cna | hetloss | BASIS    |
| PD3890       | TRIP11 | cna | hetloss | BASIS    |
| PD3905       | TRIP11 | cna | gain    | BASIS    |
| PD4005       | TRIP11 | cna | hetloss | BASIS    |
| PD4006       | TRIP11 | cna | gain    | BASIS    |
| PD4826       | TRIP11 | cna | gain    | BASIS    |
| PD4967       | TRIP11 | cna | hetloss | BASIS    |
| PD5945       | TRIP11 | cna | gain    | BASIS    |
| PD5948       | TRIP11 | cna | gain    | BASIS    |
| PD6406       | TRIP11 | cna | hetloss | BASIS    |
| PD6413       | TRIP11 | cna | hetloss | BASIS    |
| PD7067       | TRIP11 | cna | gain    | BASIS    |
| PD8980       | TRIP11 | cna | hetloss | BASIS    |
| PD9702       | TRIP11 | cna | gain    | BASIS    |
| TCGA-A2-A25B | USP9X  | cna | gain    | TCGA     |
| TCGA-AN-A0XU | USP9X  | cna | hetloss | TCGA     |
| TCGA-AO-A0JL | USP9X  | cna | gain    | TCGA     |
| TCGA-BH-A0AW | USP9X  | cna | gain    | TCGA     |
| TCGA-E2-A1L7 | USP9X  | cna | hetloss | TCGA     |
| TCGA-E9-A1NC | USP9X  | cna | hetloss | TCGA     |
| MB-0346      | USP9X  | cna | hetloss | METABRIC |
| MB-2827      | USP9X  | cna | hetloss | METABRIC |
| MB-5070      | USP9X  | cna | hetloss | METABRIC |
| MB-5465      | USP9X  | cna | gain    | METABRIC |
| MB-6098      | USP9X  | cna | hetloss | METABRIC |
| MB-0420      | USP9X  | cna | hetloss | METABRIC |
| MTS-T0064    | USP9X  | cna | hetloss | METABRIC |

|              |       |     |         |          |
|--------------|-------|-----|---------|----------|
| PD10014      | USP9X | cna | hetloss | BASIS    |
| PD11327      | USP9X | cna | homdel  | BASIS    |
| PD11742      | USP9X | cna | hetloss | BASIS    |
| PD13296      | USP9X | cna | gain    | BASIS    |
| PD13299      | USP9X | cna | amp     | BASIS    |
| PD13771      | USP9X | cna | gain    | BASIS    |
| PD14442      | USP9X | cna | gain    | BASIS    |
| PD23562      | USP9X | cna | hetloss | BASIS    |
| PD23574      | USP9X | cna | gain    | BASIS    |
| PD23578      | USP9X | cna | hetloss | BASIS    |
| PD24206      | USP9X | cna | homdel  | BASIS    |
| PD3905       | USP9X | cna | gain    | BASIS    |
| PD4005       | USP9X | cna | hetloss | BASIS    |
| PD4006       | USP9X | cna | hetloss | BASIS    |
| PD4107       | USP9X | cna | gain    | BASIS    |
| PD4826       | USP9X | cna | gain    | BASIS    |
| PD4967       | USP9X | cna | gain    | BASIS    |
| PD5935       | USP9X | cna | gain    | BASIS    |
| PD5948       | USP9X | cna | gain    | BASIS    |
| PD6406       | USP9X | cna | gain    | BASIS    |
| PD6413       | USP9X | cna | gain    | BASIS    |
| PD7215       | USP9X | cna | gain    | BASIS    |
| PD8621       | USP9X | cna | amp     | BASIS    |
| PD8980       | USP9X | cna | hetloss | BASIS    |
| PD9004       | USP9X | cna | gain    | BASIS    |
| PD9585       | USP9X | cna | hetloss | BASIS    |
| PD9702       | USP9X | cna | gain    | BASIS    |
| TCGA-A2-A25B | ZMYM3 | cna | gain    | TCGA     |
| TCGA-AN-A0XU | ZMYM3 | cna | hetloss | TCGA     |
| TCGA-AO-A0JL | ZMYM3 | cna | gain    | TCGA     |
| TCGA-BH-A0AW | ZMYM3 | cna | gain    | TCGA     |
| TCGA-C8-A12L | ZMYM3 | cna | hetloss | TCGA     |
| TCGA-E2-A1L7 | ZMYM3 | cna | hetloss | TCGA     |
| TCGA-E9-A1NC | ZMYM3 | cna | hetloss | TCGA     |
| MB-0346      | ZMYM3 | cna | hetloss | METABRIC |
| MB-2827      | ZMYM3 | cna | hetloss | METABRIC |
| MB-5465      | ZMYM3 | cna | gain    | METABRIC |
| MB-6060      | ZMYM3 | cna | hetloss | METABRIC |
| MB-0420      | ZMYM3 | cna | hetloss | METABRIC |
| PD10014      | ZMYM3 | cna | hetloss | BASIS    |
| PD11327      | ZMYM3 | cna | hetloss | BASIS    |
| PD13296      | ZMYM3 | cna | amp     | BASIS    |
| PD13297      | ZMYM3 | cna | gain    | BASIS    |
| PD13299      | ZMYM3 | cna | gain    | BASIS    |
| PD13771      | ZMYM3 | cna | gain    | BASIS    |
| PD14442      | ZMYM3 | cna | gain    | BASIS    |
| PD23562      | ZMYM3 | cna | hetloss | BASIS    |



|              |       |     |         |          |
|--------------|-------|-----|---------|----------|
| PD23574      | ZMYM3 | cna | gain    | BASIS    |
| PD24202      | ZMYM3 | cna | gain    | BASIS    |
| PD24206      | ZMYM3 | cna | gain    | BASIS    |
| PD3890       | ZMYM3 | cna | gain    | BASIS    |
| PD3905       | ZMYM3 | cna | gain    | BASIS    |
| PD4005       | ZMYM3 | cna | hetloss | BASIS    |
| PD4006       | ZMYM3 | cna | gain    | BASIS    |
| PD4107       | ZMYM3 | cna | amp     | BASIS    |
| PD4826       | ZMYM3 | cna | gain    | BASIS    |
| PD4967       | ZMYM3 | cna | gain    | BASIS    |
| PD5930       | ZMYM3 | cna | gain    | BASIS    |
| PD5935       | ZMYM3 | cna | gain    | BASIS    |
| PD5948       | ZMYM3 | cna | gain    | BASIS    |
| PD6406       | ZMYM3 | cna | gain    | BASIS    |
| PD6413       | ZMYM3 | cna | gain    | BASIS    |
| PD7067       | ZMYM3 | cna | gain    | BASIS    |
| PD7215       | ZMYM3 | cna | gain    | BASIS    |
| PD8621       | ZMYM3 | cna | amp     | BASIS    |
| PD8980       | ZMYM3 | cna | gain    | BASIS    |
| PD9004       | ZMYM3 | cna | gain    | BASIS    |
| TCGA-AN-A0XU | AFF4  | cna | hetloss | TCGA     |
| TCGA-AO-A0JL | AFF4  | cna | hetloss | TCGA     |
| TCGA-BH-A0C0 | AFF4  | cna | hetloss | TCGA     |
| TCGA-BH-A18R | AFF4  | cna | gain    | TCGA     |
| TCGA-BH-A1FU | AFF4  | cna | hetloss | TCGA     |
| TCGA-C8-A12L | AFF4  | cna | hetloss | TCGA     |
| TCGA-D8-A27M | AFF4  | cna | hetloss | TCGA     |
| TCGA-E2-A1L7 | AFF4  | cna | gain    | TCGA     |
| TCGA-E9-A1NC | AFF4  | cna | hetloss | TCGA     |
| TCGA-LL-A5YP | AFF4  | cna | hetloss | TCGA     |
| MB-0346      | AFF4  | cna | gain    | METABRIC |
| MB-2827      | AFF4  | cna | hetloss | METABRIC |
| MB-5070      | AFF4  | cna | hetloss | METABRIC |
| MB-5107      | AFF4  | cna | hetloss | METABRIC |
| MB-5465      | AFF4  | cna | hetloss | METABRIC |
| MB-6060      | AFF4  | cna | hetloss | METABRIC |
| MB-6098      | AFF4  | cna | hetloss | METABRIC |
| MB-7038      | AFF4  | cna | hetloss | METABRIC |
| MB-0420      | AFF4  | cna | hetloss | METABRIC |
| PD10014      | AFF4  | cna | hetloss | BASIS    |
| PD13296      | AFF4  | cna | hetloss | BASIS    |
| PD13297      | AFF4  | cna | hetloss | BASIS    |
| PD13771      | AFF4  | cna | gain    | BASIS    |
| PD22355      | AFF4  | cna | hetloss | BASIS    |
| PD23562      | AFF4  | cna | hetloss | BASIS    |
| PD23578      | AFF4  | cna | hetloss | BASIS    |
| PD24202      | AFF4  | cna | hetloss | BASIS    |

|              |          |     |         |          |
|--------------|----------|-----|---------|----------|
| PD24206      | AFF4     | cna | gain    | BASIS    |
| PD24337      | AFF4     | cna | hetloss | BASIS    |
| PD3890       | AFF4     | cna | hetloss | BASIS    |
| PD3905       | AFF4     | cna | gain    | BASIS    |
| PD4005       | AFF4     | cna | hetloss | BASIS    |
| PD5935       | AFF4     | cna | gain    | BASIS    |
| PD5945       | AFF4     | cna | gain    | BASIS    |
| PD6406       | AFF4     | cna | hetloss | BASIS    |
| PD6413       | AFF4     | cna | hetloss | BASIS    |
| PD7067       | AFF4     | cna | gain    | BASIS    |
| PD8980       | AFF4     | cna | hetloss | BASIS    |
| PD9585       | AFF4     | cna | hetloss | BASIS    |
| TCGA-AN-A0XU | ARHGAP26 | cna | hetloss | TCGA     |
| TCGA-AO-A0JL | ARHGAP26 | cna | hetloss | TCGA     |
| TCGA-BH-A0C0 | ARHGAP26 | cna | hetloss | TCGA     |
| TCGA-BH-A1FU | ARHGAP26 | cna | hetloss | TCGA     |
| TCGA-C8-A12L | ARHGAP26 | cna | hetloss | TCGA     |
| TCGA-D8-A27M | ARHGAP26 | cna | hetloss | TCGA     |
| TCGA-E2-A1L7 | ARHGAP26 | cna | hetloss | TCGA     |
| TCGA-E9-A1NC | ARHGAP26 | cna | hetloss | TCGA     |
| TCGA-LL-A5YP | ARHGAP26 | cna | hetloss | TCGA     |
| MB-0346      | ARHGAP26 | cna | gain    | METABRIC |
| MB-2827      | ARHGAP26 | cna | hetloss | METABRIC |
| MB-5070      | ARHGAP26 | cna | hetloss | METABRIC |
| MB-5465      | ARHGAP26 | cna | hetloss | METABRIC |
| MB-6098      | ARHGAP26 | cna | hetloss | METABRIC |
| MB-7038      | ARHGAP26 | cna | hetloss | METABRIC |
| MB-0420      | ARHGAP26 | cna | hetloss | METABRIC |
| PD10014      | ARHGAP26 | cna | hetloss | BASIS    |
| PD13296      | ARHGAP26 | cna | hetloss | BASIS    |
| PD13297      | ARHGAP26 | cna | hetloss | BASIS    |
| PD13771      | ARHGAP26 | cna | gain    | BASIS    |
| PD22355      | ARHGAP26 | cna | hetloss | BASIS    |
| PD23562      | ARHGAP26 | cna | gain    | BASIS    |
| PD23578      | ARHGAP26 | cna | hetloss | BASIS    |
| PD24186      | ARHGAP26 | cna | gain    | BASIS    |
| PD24202      | ARHGAP26 | cna | hetloss | BASIS    |
| PD24206      | ARHGAP26 | cna | gain    | BASIS    |
| PD24337      | ARHGAP26 | cna | hetloss | BASIS    |
| PD3890       | ARHGAP26 | cna | hetloss | BASIS    |
| PD3905       | ARHGAP26 | cna | gain    | BASIS    |
| PD4005       | ARHGAP26 | cna | hetloss | BASIS    |
| PD4826       | ARHGAP26 | cna | gain    | BASIS    |
| PD5935       | ARHGAP26 | cna | gain    | BASIS    |
| PD5945       | ARHGAP26 | cna | gain    | BASIS    |
| PD6406       | ARHGAP26 | cna | hetloss | BASIS    |
| PD6413       | ARHGAP26 | cna | hetloss | BASIS    |

|              |          |     |         |          |
|--------------|----------|-----|---------|----------|
| PD7067       | ARHGAP26 | cna | gain    | BASIS    |
| PD8980       | ARHGAP26 | cna | hetloss | BASIS    |
| PD9004       | ARHGAP26 | cna | gain    | BASIS    |
| PD9585       | ARHGAP26 | cna | hetloss | BASIS    |
| TCGA-A2-A25B | ARHGEF12 | cna | hetloss | TCGA     |
| TCGA-AO-A0JL | ARHGEF12 | cna | hetloss | TCGA     |
| TCGA-BH-A0C0 | ARHGEF12 | cna | hetloss | TCGA     |
| TCGA-BH-A18R | ARHGEF12 | cna | homdel  | TCGA     |
| TCGA-D8-A27M | ARHGEF12 | cna | hetloss | TCGA     |
| TCGA-E2-A1L7 | ARHGEF12 | cna | hetloss | TCGA     |
| TCGA-E9-A1NC | ARHGEF12 | cna | hetloss | TCGA     |
| TCGA-EW-A1OX | ARHGEF12 | cna | homdel  | TCGA     |
| TCGA-LL-A5YP | ARHGEF12 | cna | hetloss | TCGA     |
| MB-0346      | ARHGEF12 | cna | hetloss | METABRIC |
| MB-5070      | ARHGEF12 | cna | hetloss | METABRIC |
| MB-5107      | ARHGEF12 | cna | hetloss | METABRIC |
| MB-6271      | ARHGEF12 | cna | hetloss | METABRIC |
| MB-7032      | ARHGEF12 | cna | hetloss | METABRIC |
| PD10014      | ARHGEF12 | cna | gain    | BASIS    |
| PD11327      | ARHGEF12 | cna | gain    | BASIS    |
| PD11742      | ARHGEF12 | cna | hetloss | BASIS    |
| PD13296      | ARHGEF12 | cna | hetloss | BASIS    |
| PD13297      | ARHGEF12 | cna | hetloss | BASIS    |
| PD13771      | ARHGEF12 | cna | hetloss | BASIS    |
| PD22355      | ARHGEF12 | cna | hetloss | BASIS    |
| PD23574      | ARHGEF12 | cna | gain    | BASIS    |
| PD23578      | ARHGEF12 | cna | hetloss | BASIS    |
| PD24186      | ARHGEF12 | cna | gain    | BASIS    |
| PD24206      | ARHGEF12 | cna | gain    | BASIS    |
| PD24337      | ARHGEF12 | cna | hetloss | BASIS    |
| PD3890       | ARHGEF12 | cna | gain    | BASIS    |
| PD3905       | ARHGEF12 | cna | gain    | BASIS    |
| PD4005       | ARHGEF12 | cna | hetloss | BASIS    |
| PD4826       | ARHGEF12 | cna | hetloss | BASIS    |
| PD5935       | ARHGEF12 | cna | gain    | BASIS    |
| PD5945       | ARHGEF12 | cna | gain    | BASIS    |
| PD5948       | ARHGEF12 | cna | gain    | BASIS    |
| PD6413       | ARHGEF12 | cna | hetloss | BASIS    |
| PD6731       | ARHGEF12 | cna | hetloss | BASIS    |
| PD7067       | ARHGEF12 | cna | gain    | BASIS    |
| PD7215       | ARHGEF12 | cna | gain    | BASIS    |
| PD9004       | ARHGEF12 | cna | hetloss | BASIS    |
| PD9702       | ARHGEF12 | cna | gain    | BASIS    |
| TCGA-A2-A25B | ARID1A   | cna | hetloss | TCGA     |
| TCGA-AN-A0XU | ARID1A   | cna | hetloss | TCGA     |
| TCGA-AO-A0JL | ARID1A   | cna | hetloss | TCGA     |
| TCGA-BH-A0AW | ARID1A   | cna | gain    | TCGA     |

|              |        |     |         |          |
|--------------|--------|-----|---------|----------|
| TCGA-BH-A0C0 | ARID1A | cna | hetloss | TCGA     |
| TCGA-BH-A18R | ARID1A | cna | homdel  | TCGA     |
| TCGA-BH-A1FU | ARID1A | cna | gain    | TCGA     |
| TCGA-C8-A12L | ARID1A | cna | hetloss | TCGA     |
| TCGA-D8-A27M | ARID1A | cna | gain    | TCGA     |
| TCGA-E2-A1L7 | ARID1A | cna | hetloss | TCGA     |
| TCGA-E9-A1NC | ARID1A | cna | hetloss | TCGA     |
| TCGA-EW-A10X | ARID1A | cna | homdel  | TCGA     |
| TCGA-LL-A5YP | ARID1A | cna | gain    | TCGA     |
| MB-0346      | ARID1A | cna | hetloss | METABRIC |
| MB-2827      | ARID1A | cna | hetloss | METABRIC |
| MB-5070      | ARID1A | cna | hetloss | METABRIC |
| MB-5465      | ARID1A | cna | hetloss | METABRIC |
| MB-6060      | ARID1A | cna | hetloss | METABRIC |
| MB-6098      | ARID1A | cna | hetloss | METABRIC |
| PD10014      | ARID1A | cna | gain    | BASIS    |
| PD11327      | ARID1A | cna | hetloss | BASIS    |
| PD11742      | ARID1A | cna | hetloss | BASIS    |
| PD13296      | ARID1A | cna | hetloss | BASIS    |
| PD13771      | ARID1A | cna | hetloss | BASIS    |
| PD22355      | ARID1A | cna | hetloss | BASIS    |
| PD24186      | ARID1A | cna | gain    | BASIS    |
| PD24206      | ARID1A | cna | hetloss | BASIS    |
| PD24337      | ARID1A | cna | hetloss | BASIS    |
| PD3890       | ARID1A | cna | hetloss | BASIS    |
| PD3905       | ARID1A | cna | gain    | BASIS    |
| PD4006       | ARID1A | cna | gain    | BASIS    |
| PD4826       | ARID1A | cna | gain    | BASIS    |
| PD5945       | ARID1A | cna | amp     | BASIS    |
| PD5948       | ARID1A | cna | gain    | BASIS    |
| PD7067       | ARID1A | cna | gain    | BASIS    |
| PD7215       | ARID1A | cna | gain    | BASIS    |
| PD9004       | ARID1A | cna | hetloss | BASIS    |
| PD9585       | ARID1A | cna | hetloss | BASIS    |
| PD9702       | ARID1A | cna | gain    | BASIS    |
| TCGA-A2-A25B | ATP1B4 | cna | hetloss | TCGA     |
| TCGA-AN-A0XU | ATP1B4 | cna | hetloss | TCGA     |
| TCGA-BH-A0AW | ATP1B4 | cna | gain    | TCGA     |
| TCGA-C8-A12L | ATP1B4 | cna | gain    | TCGA     |
| TCGA-E2-A1L7 | ATP1B4 | cna | hetloss | TCGA     |
| TCGA-E9-A1NC | ATP1B4 | cna | hetloss | TCGA     |
| MB-0346      | ATP1B4 | cna | hetloss | METABRIC |
| MB-2827      | ATP1B4 | cna | hetloss | METABRIC |
| MB-5465      | ATP1B4 | cna | hetloss | METABRIC |
| MB-6098      | ATP1B4 | cna | hetloss | METABRIC |
| MB-7038      | ATP1B4 | cna | gain    | METABRIC |
| PD10014      | ATP1B4 | cna | hetloss | BASIS    |

|                   |        |     |         |            |
|-------------------|--------|-----|---------|------------|
| PD11327           | ATP1B4 | cna | homdel  | BASIS      |
| PD13296           | ATP1B4 | cna | hetloss | BASIS      |
| PD13299           | ATP1B4 | cna | amp     | BASIS      |
| PD13771           | ATP1B4 | cna | gain    | BASIS      |
| PD14442           | ATP1B4 | cna | gain    | BASIS      |
| PD23562           | ATP1B4 | cna | hetloss | BASIS      |
| PD23574           | ATP1B4 | cna | gain    | BASIS      |
| PD23578           | ATP1B4 | cna | hetloss | BASIS      |
| PD24202           | ATP1B4 | cna | hetloss | BASIS      |
| PD24206           | ATP1B4 | cna | gain    | BASIS      |
| PD3905            | ATP1B4 | cna | gain    | BASIS      |
| PD4005            | ATP1B4 | cna | gain    | BASIS      |
| PD4006            | ATP1B4 | cna | gain    | BASIS      |
| PD4107            | ATP1B4 | cna | gain    | BASIS      |
| PD4826            | ATP1B4 | cna | gain    | BASIS      |
| PD4967            | ATP1B4 | cna | gain    | BASIS      |
| PD5930            | ATP1B4 | cna | gain    | BASIS      |
| PD5935            | ATP1B4 | cna | gain    | BASIS      |
| PD5945            | ATP1B4 | cna | gain    | BASIS      |
| PD5948            | ATP1B4 | cna | gain    | BASIS      |
| PD6406            | ATP1B4 | cna | gain    | BASIS      |
| PD6413            | ATP1B4 | cna | gain    | BASIS      |
| PD7067            | ATP1B4 | cna | gain    | BASIS      |
| PD7215            | ATP1B4 | cna | gain    | BASIS      |
| PD8621            | ATP1B4 | cna | amp     | BASIS      |
| PD8980            | ATP1B4 | cna | hetloss | BASIS      |
| PD9004            | ATP1B4 | cna | gain    | BASIS      |
| TCGA-A2-A25B      | BCL6   | cna | amp     | TCGA       |
| TCGA-AN-A0XU      | BCL6   | cna | gain    | TCGA       |
| TCGA-BH-A0AW      | BCL6   | cna | gain    | TCGA       |
| TCGA-BH-A0C0      | BCL6   | cna | gain    | TCGA       |
| TCGA-BH-A1FU      | BCL6   | cna | hetloss | TCGA       |
| TCGA-C8-A12L      | BCL6   | cna | gain    | TCGA       |
| TCGA-LL-A5YP      | BCL6   | cna | gain    | TCGA       |
| MB-0346           | BCL6   | cna | gain    | METABRIC   |
| MB-5070           | BCL6   | cna | hetloss | METABRIC   |
| MB-5107           | BCL6   | cna | amp     | METABRIC   |
| MB-5465           | BCL6   | cna | gain    | METABRIC   |
| MB-6060           | BCL6   | cna | gain    | METABRIC   |
| MB-6098           | BCL6   | cna | gain    | METABRIC   |
| MB-7038           | BCL6   | cna | hetloss | METABRIC   |
| P-0002858-T01-IM3 | BCL6   | cna | amp     | MSK-IMPACT |
| PD11327           | BCL6   | cna | gain    | BASIS      |
| PD13299           | BCL6   | cna | gain    | BASIS      |
| PD13771           | BCL6   | cna | hetloss | BASIS      |
| PD22355           | BCL6   | cna | gain    | BASIS      |
| PD23561           | BCL6   | cna | hetloss | BASIS      |

|              |        |     |         |          |
|--------------|--------|-----|---------|----------|
| PD23562      | BCL6   | cna | gain    | BASIS    |
| PD23578      | BCL6   | cna | gain    | BASIS    |
| PD24186      | BCL6   | cna | amp     | BASIS    |
| PD24202      | BCL6   | cna | gain    | BASIS    |
| PD3905       | BCL6   | cna | gain    | BASIS    |
| PD4005       | BCL6   | cna | gain    | BASIS    |
| PD4107       | BCL6   | cna | gain    | BASIS    |
| PD4826       | BCL6   | cna | gain    | BASIS    |
| PD5930       | BCL6   | cna | gain    | BASIS    |
| PD5945       | BCL6   | cna | amp     | BASIS    |
| PD5948       | BCL6   | cna | gain    | BASIS    |
| PD6406       | BCL6   | cna | gain    | BASIS    |
| PD6731       | BCL6   | cna | gain    | BASIS    |
| PD7067       | BCL6   | cna | gain    | BASIS    |
| PD7215       | BCL6   | cna | gain    | BASIS    |
| PD8621       | BCL6   | cna | gain    | BASIS    |
| PD8980       | BCL6   | cna | gain    | BASIS    |
| PD9004       | BCL6   | cna | gain    | BASIS    |
| PD9702       | BCL6   | cna | gain    | BASIS    |
| TCGA-A2-A25B | BCORL1 | cna | hetloss | TCGA     |
| TCGA-AN-A0XU | BCORL1 | cna | hetloss | TCGA     |
| TCGA-BH-A0AW | BCORL1 | cna | gain    | TCGA     |
| TCGA-C8-A12L | BCORL1 | cna | gain    | TCGA     |
| TCGA-E2-A1L7 | BCORL1 | cna | hetloss | TCGA     |
| TCGA-E9-A1NC | BCORL1 | cna | hetloss | TCGA     |
| TCGA-LL-A5YP | BCORL1 | cna | gain    | TCGA     |
| MB-0346      | BCORL1 | cna | hetloss | METABRIC |
| MB-2827      | BCORL1 | cna | hetloss | METABRIC |
| MB-5465      | BCORL1 | cna | hetloss | METABRIC |
| MB-6060      | BCORL1 | cna | gain    | METABRIC |
| MB-6098      | BCORL1 | cna | hetloss | METABRIC |
| MB-7038      | BCORL1 | cna | gain    | METABRIC |
| MB-0420      | BCORL1 | cna | hetloss | METABRIC |
| PD10014      | BCORL1 | cna | hetloss | BASIS    |
| PD13296      | BCORL1 | cna | gain    | BASIS    |
| PD13299      | BCORL1 | cna | amp     | BASIS    |
| PD13771      | BCORL1 | cna | gain    | BASIS    |
| PD14442      | BCORL1 | cna | gain    | BASIS    |
| PD23562      | BCORL1 | cna | hetloss | BASIS    |
| PD23574      | BCORL1 | cna | gain    | BASIS    |
| PD23578      | BCORL1 | cna | hetloss | BASIS    |
| PD24202      | BCORL1 | cna | hetloss | BASIS    |
| PD24206      | BCORL1 | cna | gain    | BASIS    |
| PD3890       | BCORL1 | cna | hetloss | BASIS    |
| PD3905       | BCORL1 | cna | gain    | BASIS    |
| PD4107       | BCORL1 | cna | gain    | BASIS    |
| PD4826       | BCORL1 | cna | gain    | BASIS    |

|              |        |     |         |          |
|--------------|--------|-----|---------|----------|
| PD4967       | BCORL1 | cna | gain    | BASIS    |
| PD5930       | BCORL1 | cna | gain    | BASIS    |
| PD5935       | BCORL1 | cna | gain    | BASIS    |
| PD5945       | BCORL1 | cna | gain    | BASIS    |
| PD5948       | BCORL1 | cna | gain    | BASIS    |
| PD6406       | BCORL1 | cna | gain    | BASIS    |
| PD6413       | BCORL1 | cna | gain    | BASIS    |
| PD7215       | BCORL1 | cna | gain    | BASIS    |
| PD8621       | BCORL1 | cna | amp     | BASIS    |
| PD8980       | BCORL1 | cna | hetloss | BASIS    |
| PD9004       | BCORL1 | cna | gain    | BASIS    |
| TCGA-A2-A25B | BIRC2  | cna | hetloss | TCGA     |
| TCGA-AN-A0XU | BIRC2  | cna | gain    | TCGA     |
| TCGA-AO-A0JL | BIRC2  | cna | hetloss | TCGA     |
| TCGA-BH-A18R | BIRC2  | cna | gain    | TCGA     |
| TCGA-D8-A27M | BIRC2  | cna | hetloss | TCGA     |
| TCGA-EW-A10X | BIRC2  | cna | homdel  | TCGA     |
| TCGA-LL-A5YP | BIRC2  | cna | hetloss | TCGA     |
| MB-0346      | BIRC2  | cna | hetloss | METABRIC |
| MB-5070      | BIRC2  | cna | hetloss | METABRIC |
| MB-5107      | BIRC2  | cna | hetloss | METABRIC |
| MB-6271      | BIRC2  | cna | hetloss | METABRIC |
| MB-7032      | BIRC2  | cna | hetloss | METABRIC |
| MB-7048      | BIRC2  | cna | hetloss | METABRIC |
| MTS-T0064    | BIRC2  | cna | amp     | METABRIC |
| PD10014      | BIRC2  | cna | gain    | BASIS    |
| PD11327      | BIRC2  | cna | gain    | BASIS    |
| PD11742      | BIRC2  | cna | hetloss | BASIS    |
| PD13296      | BIRC2  | cna | hetloss | BASIS    |
| PD13299      | BIRC2  | cna | gain    | BASIS    |
| PD13771      | BIRC2  | cna | hetloss | BASIS    |
| PD22355      | BIRC2  | cna | hetloss | BASIS    |
| PD23574      | BIRC2  | cna | gain    | BASIS    |
| PD23578      | BIRC2  | cna | hetloss | BASIS    |
| PD24186      | BIRC2  | cna | gain    | BASIS    |
| PD24206      | BIRC2  | cna | gain    | BASIS    |
| PD24337      | BIRC2  | cna | hetloss | BASIS    |
| PD3905       | BIRC2  | cna | gain    | BASIS    |
| PD4005       | BIRC2  | cna | hetloss | BASIS    |
| PD4006       | BIRC2  | cna | hetloss | BASIS    |
| PD4826       | BIRC2  | cna | hetloss | BASIS    |
| PD5935       | BIRC2  | cna | gain    | BASIS    |
| PD5945       | BIRC2  | cna | gain    | BASIS    |
| PD5948       | BIRC2  | cna | gain    | BASIS    |
| PD6413       | BIRC2  | cna | hetloss | BASIS    |
| PD6731       | BIRC2  | cna | hetloss | BASIS    |
| PD7067       | BIRC2  | cna | amp     | BASIS    |

|              |       |     |         |          |
|--------------|-------|-----|---------|----------|
| PD7215       | BIRC2 | cna | gain    | BASIS    |
| PD9585       | BIRC2 | cna | gain    | BASIS    |
| PD9702       | BIRC2 | cna | gain    | BASIS    |
| TCGA-A2-A25B | BIRC3 | cna | hetloss | TCGA     |
| TCGA-AN-A0XU | BIRC3 | cna | gain    | TCGA     |
| TCGA-AO-A0JL | BIRC3 | cna | hetloss | TCGA     |
| TCGA-BH-A18R | BIRC3 | cna | gain    | TCGA     |
| TCGA-D8-A27M | BIRC3 | cna | hetloss | TCGA     |
| TCGA-EW-A10X | BIRC3 | cna | homdel  | TCGA     |
| TCGA-LL-A5YP | BIRC3 | cna | hetloss | TCGA     |
| MB-0346      | BIRC3 | cna | hetloss | METABRIC |
| MB-5070      | BIRC3 | cna | hetloss | METABRIC |
| MB-5107      | BIRC3 | cna | hetloss | METABRIC |
| MB-6271      | BIRC3 | cna | hetloss | METABRIC |
| MB-7032      | BIRC3 | cna | hetloss | METABRIC |
| MB-7048      | BIRC3 | cna | hetloss | METABRIC |
| MTS-T0064    | BIRC3 | cna | amp     | METABRIC |
| PD10014      | BIRC3 | cna | gain    | BASIS    |
| PD11327      | BIRC3 | cna | gain    | BASIS    |
| PD11742      | BIRC3 | cna | hetloss | BASIS    |
| PD13296      | BIRC3 | cna | hetloss | BASIS    |
| PD13299      | BIRC3 | cna | gain    | BASIS    |
| PD13771      | BIRC3 | cna | hetloss | BASIS    |
| PD22355      | BIRC3 | cna | hetloss | BASIS    |
| PD23574      | BIRC3 | cna | gain    | BASIS    |
| PD23578      | BIRC3 | cna | hetloss | BASIS    |
| PD24186      | BIRC3 | cna | gain    | BASIS    |
| PD24206      | BIRC3 | cna | gain    | BASIS    |
| PD24337      | BIRC3 | cna | hetloss | BASIS    |
| PD3905       | BIRC3 | cna | gain    | BASIS    |
| PD4005       | BIRC3 | cna | hetloss | BASIS    |
| PD4006       | BIRC3 | cna | hetloss | BASIS    |
| PD4826       | BIRC3 | cna | hetloss | BASIS    |
| PD5935       | BIRC3 | cna | gain    | BASIS    |
| PD5945       | BIRC3 | cna | gain    | BASIS    |
| PD5948       | BIRC3 | cna | gain    | BASIS    |
| PD6413       | BIRC3 | cna | hetloss | BASIS    |
| PD6731       | BIRC3 | cna | hetloss | BASIS    |
| PD7067       | BIRC3 | cna | amp     | BASIS    |
| PD7215       | BIRC3 | cna | gain    | BASIS    |
| PD9585       | BIRC3 | cna | gain    | BASIS    |
| PD9702       | BIRC3 | cna | gain    | BASIS    |
| TCGA-A2-A25B | CARS  | cna | hetloss | TCGA     |
| TCGA-AN-A0XU | CARS  | cna | hetloss | TCGA     |
| TCGA-AO-A0JL | CARS  | cna | hetloss | TCGA     |
| TCGA-BH-A0C0 | CARS  | cna | hetloss | TCGA     |
| TCGA-C8-A12L | CARS  | cna | hetloss | TCGA     |



|              |         |     |         |          |
|--------------|---------|-----|---------|----------|
| TCGA-E2-A1L7 | CARS    | cna | homdel  | TCGA     |
| TCGA-E9-A1NC | CARS    | cna | hetloss | TCGA     |
| TCGA-LL-A5YP | CARS    | cna | hetloss | TCGA     |
| MB-0346      | CARS    | cna | hetloss | METABRIC |
| MB-5070      | CARS    | cna | hetloss | METABRIC |
| MB-6060      | CARS    | cna | hetloss | METABRIC |
| MB-6098      | CARS    | cna | hetloss | METABRIC |
| MB-6271      | CARS    | cna | gain    | METABRIC |
| MB-7032      | CARS    | cna | hetloss | METABRIC |
| MB-7048      | CARS    | cna | hetloss | METABRIC |
| MB-0420      | CARS    | cna | hetloss | METABRIC |
| PD10014      | CARS    | cna | hetloss | BASIS    |
| PD11742      | CARS    | cna | hetloss | BASIS    |
| PD13296      | CARS    | cna | hetloss | BASIS    |
| PD13297      | CARS    | cna | hetloss | BASIS    |
| PD22355      | CARS    | cna | hetloss | BASIS    |
| PD24202      | CARS    | cna | hetloss | BASIS    |
| PD24206      | CARS    | cna | gain    | BASIS    |
| PD3890       | CARS    | cna | hetloss | BASIS    |
| PD3905       | CARS    | cna | gain    | BASIS    |
| PD4005       | CARS    | cna | hetloss | BASIS    |
| PD4006       | CARS    | cna | gain    | BASIS    |
| PD4107       | CARS    | cna | gain    | BASIS    |
| PD4826       | CARS    | cna | gain    | BASIS    |
| PD4967       | CARS    | cna | gain    | BASIS    |
| PD5935       | CARS    | cna | gain    | BASIS    |
| PD5945       | CARS    | cna | gain    | BASIS    |
| PD5948       | CARS    | cna | gain    | BASIS    |
| PD6406       | CARS    | cna | hetloss | BASIS    |
| PD6413       | CARS    | cna | hetloss | BASIS    |
| PD6731       | CARS    | cna | hetloss | BASIS    |
| PD8980       | CARS    | cna | hetloss | BASIS    |
| PD9004       | CARS    | cna | hetloss | BASIS    |
| PD9585       | CARS    | cna | hetloss | BASIS    |
| TCGA-AN-A0XU | CBFA2T3 | cna | gain    | TCGA     |
| TCGA-AO-A0JL | CBFA2T3 | cna | gain    | TCGA     |
| TCGA-BH-A0AW | CBFA2T3 | cna | hetloss | TCGA     |
| TCGA-BH-A0C0 | CBFA2T3 | cna | gain    | TCGA     |
| TCGA-C8-A12L | CBFA2T3 | cna | hetloss | TCGA     |
| TCGA-E2-A1L7 | CBFA2T3 | cna | hetloss | TCGA     |
| TCGA-E9-A1NC | CBFA2T3 | cna | hetloss | TCGA     |
| TCGA-LL-A5YP | CBFA2T3 | cna | gain    | TCGA     |
| MB-0346      | CBFA2T3 | cna | gain    | METABRIC |
| MB-5107      | CBFA2T3 | cna | hetloss | METABRIC |
| MB-6271      | CBFA2T3 | cna | hetloss | METABRIC |
| MB-7032      | CBFA2T3 | cna | hetloss | METABRIC |
| MB-7038      | CBFA2T3 | cna | gain    | METABRIC |

|              |         |     |         |          |
|--------------|---------|-----|---------|----------|
| MB-7048      | CBFA2T3 | cna | hetloss | METABRIC |
| MB-0420      | CBFA2T3 | cna | hetloss | METABRIC |
| PD10014      | CBFA2T3 | cna | hetloss | BASIS    |
| PD11327      | CBFA2T3 | cna | gain    | BASIS    |
| PD11742      | CBFA2T3 | cna | hetloss | BASIS    |
| PD13296      | CBFA2T3 | cna | hetloss | BASIS    |
| PD13297      | CBFA2T3 | cna | hetloss | BASIS    |
| PD13299      | CBFA2T3 | cna | gain    | BASIS    |
| PD14442      | CBFA2T3 | cna | hetloss | BASIS    |
| PD23562      | CBFA2T3 | cna | gain    | BASIS    |
| PD23574      | CBFA2T3 | cna | gain    | BASIS    |
| PD24202      | CBFA2T3 | cna | hetloss | BASIS    |
| PD3890       | CBFA2T3 | cna | gain    | BASIS    |
| PD3905       | CBFA2T3 | cna | gain    | BASIS    |
| PD4005       | CBFA2T3 | cna | hetloss | BASIS    |
| PD4006       | CBFA2T3 | cna | gain    | BASIS    |
| PD4107       | CBFA2T3 | cna | amp     | BASIS    |
| PD4967       | CBFA2T3 | cna | hetloss | BASIS    |
| PD5930       | CBFA2T3 | cna | hetloss | BASIS    |
| PD5945       | CBFA2T3 | cna | amp     | BASIS    |
| PD5948       | CBFA2T3 | cna | gain    | BASIS    |
| PD7215       | CBFA2T3 | cna | gain    | BASIS    |
| PD8621       | CBFA2T3 | cna | gain    | BASIS    |
| PD9004       | CBFA2T3 | cna | gain    | BASIS    |
| PD9585       | CBFA2T3 | cna | hetloss | BASIS    |
| PD9702       | CBFA2T3 | cna | gain    | BASIS    |
| TCGA-A2-A25B | CCT6B   | cna | gain    | TCGA     |
| TCGA-AO-A0JL | CCT6B   | cna | gain    | TCGA     |
| TCGA-BH-A0AW | CCT6B   | cna | gain    | TCGA     |
| TCGA-BH-A0C0 | CCT6B   | cna | gain    | TCGA     |
| TCGA-BH-A18R | CCT6B   | cna | amp     | TCGA     |
| TCGA-C8-A12L | CCT6B   | cna | gain    | TCGA     |
| TCGA-D8-A27M | CCT6B   | cna | hetloss | TCGA     |
| TCGA-E2-A1L7 | CCT6B   | cna | hetloss | TCGA     |
| TCGA-E9-A1NC | CCT6B   | cna | hetloss | TCGA     |
| MB-0346      | CCT6B   | cna | hetloss | METABRIC |
| MB-2827      | CCT6B   | cna | hetloss | METABRIC |
| MB-5070      | CCT6B   | cna | gain    | METABRIC |
| MB-5465      | CCT6B   | cna | hetloss | METABRIC |
| MB-6060      | CCT6B   | cna | hetloss | METABRIC |
| MB-6098      | CCT6B   | cna | hetloss | METABRIC |
| MB-6271      | CCT6B   | cna | hetloss | METABRIC |
| MB-7038      | CCT6B   | cna | hetloss | METABRIC |
| MB-7048      | CCT6B   | cna | hetloss | METABRIC |
| MB-0420      | CCT6B   | cna | hetloss | METABRIC |
| PD11327      | CCT6B   | cna | gain    | BASIS    |
| PD11742      | CCT6B   | cna | hetloss | BASIS    |

|              |       |     |         |          |
|--------------|-------|-----|---------|----------|
| PD13297      | CCT6B | cna | hetloss | BASIS    |
| PD13299      | CCT6B | cna | gain    | BASIS    |
| PD23561      | CCT6B | cna | amp     | BASIS    |
| PD24206      | CCT6B | cna | hetloss | BASIS    |
| PD24337      | CCT6B | cna | hetloss | BASIS    |
| PD3890       | CCT6B | cna | hetloss | BASIS    |
| PD4005       | CCT6B | cna | hetloss | BASIS    |
| PD4967       | CCT6B | cna | hetloss | BASIS    |
| PD5945       | CCT6B | cna | gain    | BASIS    |
| PD5948       | CCT6B | cna | gain    | BASIS    |
| PD6406       | CCT6B | cna | hetloss | BASIS    |
| PD6413       | CCT6B | cna | hetloss | BASIS    |
| PD6731       | CCT6B | cna | hetloss | BASIS    |
| PD7067       | CCT6B | cna | gain    | BASIS    |
| PD7215       | CCT6B | cna | gain    | BASIS    |
| PD9004       | CCT6B | cna | gain    | BASIS    |
| PD9585       | CCT6B | cna | hetloss | BASIS    |
| PD9702       | CCT6B | cna | gain    | BASIS    |
| TCGA-AN-A0XU | CDH11 | cna | hetloss | TCGA     |
| TCGA-AO-A0JL | CDH11 | cna | gain    | TCGA     |
| TCGA-BH-A0AW | CDH11 | cna | hetloss | TCGA     |
| TCGA-BH-A0C0 | CDH11 | cna | hetloss | TCGA     |
| TCGA-C8-A12L | CDH11 | cna | gain    | TCGA     |
| TCGA-D8-A27M | CDH11 | cna | hetloss | TCGA     |
| TCGA-E2-A1L7 | CDH11 | cna | hetloss | TCGA     |
| TCGA-E9-A1NC | CDH11 | cna | hetloss | TCGA     |
| TCGA-LL-A5YP | CDH11 | cna | gain    | TCGA     |
| MB-0346      | CDH11 | cna | gain    | METABRIC |
| MB-5107      | CDH11 | cna | hetloss | METABRIC |
| MB-6271      | CDH11 | cna | hetloss | METABRIC |
| MB-7032      | CDH11 | cna | gain    | METABRIC |
| MB-7048      | CDH11 | cna | hetloss | METABRIC |
| MB-0420      | CDH11 | cna | hetloss | METABRIC |
| PD10014      | CDH11 | cna | hetloss | BASIS    |
| PD11327      | CDH11 | cna | gain    | BASIS    |
| PD11742      | CDH11 | cna | hetloss | BASIS    |
| PD13296      | CDH11 | cna | hetloss | BASIS    |
| PD13297      | CDH11 | cna | hetloss | BASIS    |
| PD13299      | CDH11 | cna | gain    | BASIS    |
| PD14442      | CDH11 | cna | hetloss | BASIS    |
| PD23562      | CDH11 | cna | gain    | BASIS    |
| PD24186      | CDH11 | cna | gain    | BASIS    |
| PD24202      | CDH11 | cna | hetloss | BASIS    |
| PD24206      | CDH11 | cna | gain    | BASIS    |
| PD24337      | CDH11 | cna | hetloss | BASIS    |
| PD3905       | CDH11 | cna | amp     | BASIS    |
| PD4005       | CDH11 | cna | hetloss | BASIS    |

|              |       |     |         |          |
|--------------|-------|-----|---------|----------|
| PD4006       | CDH11 | cna | hetloss | BASIS    |
| PD4107       | CDH11 | cna | hetloss | BASIS    |
| PD4967       | CDH11 | cna | hetloss | BASIS    |
| PD5945       | CDH11 | cna | gain    | BASIS    |
| PD5948       | CDH11 | cna | hetloss | BASIS    |
| PD7215       | CDH11 | cna | gain    | BASIS    |
| PD8621       | CDH11 | cna | hetloss | BASIS    |
| PD8980       | CDH11 | cna | hetloss | BASIS    |
| PD9585       | CDH11 | cna | hetloss | BASIS    |
| PD9702       | CDH11 | cna | gain    | BASIS    |
| TCGA-A2-A25B | CUL4B | cna | hetloss | TCGA     |
| TCGA-AN-A0XU | CUL4B | cna | hetloss | TCGA     |
| TCGA-BH-A0AW | CUL4B | cna | gain    | TCGA     |
| TCGA-C8-A12L | CUL4B | cna | gain    | TCGA     |
| TCGA-E2-A1L7 | CUL4B | cna | hetloss | TCGA     |
| TCGA-E9-A1NC | CUL4B | cna | hetloss | TCGA     |
| MB-0346      | CUL4B | cna | hetloss | METABRIC |
| MB-2827      | CUL4B | cna | hetloss | METABRIC |
| MB-5465      | CUL4B | cna | hetloss | METABRIC |
| MB-6098      | CUL4B | cna | hetloss | METABRIC |
| MB-7038      | CUL4B | cna | gain    | METABRIC |
| PD10014      | CUL4B | cna | hetloss | BASIS    |
| PD11327      | CUL4B | cna | homdel  | BASIS    |
| PD13296      | CUL4B | cna | hetloss | BASIS    |
| PD13299      | CUL4B | cna | amp     | BASIS    |
| PD13771      | CUL4B | cna | gain    | BASIS    |
| PD14442      | CUL4B | cna | gain    | BASIS    |
| PD23562      | CUL4B | cna | hetloss | BASIS    |
| PD23574      | CUL4B | cna | gain    | BASIS    |
| PD23578      | CUL4B | cna | hetloss | BASIS    |
| PD24202      | CUL4B | cna | hetloss | BASIS    |
| PD24206      | CUL4B | cna | gain    | BASIS    |
| PD3905       | CUL4B | cna | gain    | BASIS    |
| PD4005       | CUL4B | cna | gain    | BASIS    |
| PD4006       | CUL4B | cna | gain    | BASIS    |
| PD4107       | CUL4B | cna | gain    | BASIS    |
| PD4826       | CUL4B | cna | gain    | BASIS    |
| PD4967       | CUL4B | cna | gain    | BASIS    |
| PD5930       | CUL4B | cna | gain    | BASIS    |
| PD5935       | CUL4B | cna | gain    | BASIS    |
| PD5945       | CUL4B | cna | gain    | BASIS    |
| PD5948       | CUL4B | cna | gain    | BASIS    |
| PD6406       | CUL4B | cna | gain    | BASIS    |
| PD6413       | CUL4B | cna | gain    | BASIS    |
| PD7067       | CUL4B | cna | gain    | BASIS    |
| PD7215       | CUL4B | cna | gain    | BASIS    |
| PD8621       | CUL4B | cna | amp     | BASIS    |

|              |       |     |         |          |
|--------------|-------|-----|---------|----------|
| PD8980       | CUL4B | cna | hetloss | BASIS    |
| PD9004       | CUL4B | cna | gain    | BASIS    |
| TCGA-A2-A25B | DDX3X | cna | gain    | TCGA     |
| TCGA-AN-A0XU | DDX3X | cna | hetloss | TCGA     |
| TCGA-AO-A0JL | DDX3X | cna | gain    | TCGA     |
| TCGA-BH-A0AW | DDX3X | cna | gain    | TCGA     |
| TCGA-E2-A1L7 | DDX3X | cna | hetloss | TCGA     |
| TCGA-E9-A1NC | DDX3X | cna | hetloss | TCGA     |
| MB-0346      | DDX3X | cna | hetloss | METABRIC |
| MB-2827      | DDX3X | cna | hetloss | METABRIC |
| MB-5070      | DDX3X | cna | hetloss | METABRIC |
| MB-5465      | DDX3X | cna | gain    | METABRIC |
| MB-6098      | DDX3X | cna | hetloss | METABRIC |
| MB-0420      | DDX3X | cna | hetloss | METABRIC |
| MTS-T0064    | DDX3X | cna | hetloss | METABRIC |
| PD10014      | DDX3X | cna | hetloss | BASIS    |
| PD11327      | DDX3X | cna | homdel  | BASIS    |
| PD11742      | DDX3X | cna | hetloss | BASIS    |
| PD13296      | DDX3X | cna | gain    | BASIS    |
| PD13299      | DDX3X | cna | amp     | BASIS    |
| PD13771      | DDX3X | cna | gain    | BASIS    |
| PD14442      | DDX3X | cna | gain    | BASIS    |
| PD23562      | DDX3X | cna | hetloss | BASIS    |
| PD23574      | DDX3X | cna | gain    | BASIS    |
| PD23578      | DDX3X | cna | hetloss | BASIS    |
| PD24206      | DDX3X | cna | homdel  | BASIS    |
| PD3905       | DDX3X | cna | gain    | BASIS    |
| PD4005       | DDX3X | cna | hetloss | BASIS    |
| PD4006       | DDX3X | cna | hetloss | BASIS    |
| PD4107       | DDX3X | cna | gain    | BASIS    |
| PD4826       | DDX3X | cna | gain    | BASIS    |
| PD4967       | DDX3X | cna | gain    | BASIS    |
| PD5935       | DDX3X | cna | gain    | BASIS    |
| PD5948       | DDX3X | cna | gain    | BASIS    |
| PD6406       | DDX3X | cna | gain    | BASIS    |
| PD6413       | DDX3X | cna | gain    | BASIS    |
| PD7215       | DDX3X | cna | gain    | BASIS    |
| PD8621       | DDX3X | cna | amp     | BASIS    |
| PD8980       | DDX3X | cna | hetloss | BASIS    |
| PD9004       | DDX3X | cna | gain    | BASIS    |
| PD9702       | DDX3X | cna | gain    | BASIS    |
| TCGA-A2-A25B | ELF4  | cna | hetloss | TCGA     |
| TCGA-AN-A0XU | ELF4  | cna | hetloss | TCGA     |
| TCGA-BH-A0AW | ELF4  | cna | gain    | TCGA     |
| TCGA-C8-A12L | ELF4  | cna | gain    | TCGA     |
| TCGA-E2-A1L7 | ELF4  | cna | hetloss | TCGA     |
| TCGA-E9-A1NC | ELF4  | cna | hetloss | TCGA     |

|              |       |     |         |          |
|--------------|-------|-----|---------|----------|
| TCGA-LL-A5YP | ELF4  | cna | gain    | TCGA     |
| MB-0346      | ELF4  | cna | hetloss | METABRIC |
| MB-2827      | ELF4  | cna | hetloss | METABRIC |
| MB-5465      | ELF4  | cna | hetloss | METABRIC |
| MB-6060      | ELF4  | cna | gain    | METABRIC |
| MB-6098      | ELF4  | cna | hetloss | METABRIC |
| MB-7038      | ELF4  | cna | gain    | METABRIC |
| MB-0420      | ELF4  | cna | hetloss | METABRIC |
| PD10014      | ELF4  | cna | hetloss | BASIS    |
| PD13296      | ELF4  | cna | gain    | BASIS    |
| PD13299      | ELF4  | cna | amp     | BASIS    |
| PD13771      | ELF4  | cna | gain    | BASIS    |
| PD14442      | ELF4  | cna | gain    | BASIS    |
| PD23562      | ELF4  | cna | hetloss | BASIS    |
| PD23574      | ELF4  | cna | gain    | BASIS    |
| PD23578      | ELF4  | cna | hetloss | BASIS    |
| PD24202      | ELF4  | cna | hetloss | BASIS    |
| PD24206      | ELF4  | cna | gain    | BASIS    |
| PD3890       | ELF4  | cna | hetloss | BASIS    |
| PD3905       | ELF4  | cna | gain    | BASIS    |
| PD4107       | ELF4  | cna | gain    | BASIS    |
| PD4826       | ELF4  | cna | gain    | BASIS    |
| PD4967       | ELF4  | cna | gain    | BASIS    |
| PD5930       | ELF4  | cna | gain    | BASIS    |
| PD5935       | ELF4  | cna | gain    | BASIS    |
| PD5945       | ELF4  | cna | gain    | BASIS    |
| PD5948       | ELF4  | cna | gain    | BASIS    |
| PD6406       | ELF4  | cna | gain    | BASIS    |
| PD6413       | ELF4  | cna | gain    | BASIS    |
| PD7215       | ELF4  | cna | gain    | BASIS    |
| PD8621       | ELF4  | cna | amp     | BASIS    |
| PD8980       | ELF4  | cna | hetloss | BASIS    |
| PD9004       | ELF4  | cna | gain    | BASIS    |
| TCGA-A2-A25B | EPHA8 | cna | hetloss | TCGA     |
| TCGA-AN-A0XU | EPHA8 | cna | hetloss | TCGA     |
| TCGA-AO-A0JL | EPHA8 | cna | hetloss | TCGA     |
| TCGA-BH-A0AW | EPHA8 | cna | gain    | TCGA     |
| TCGA-BH-A0C0 | EPHA8 | cna | hetloss | TCGA     |
| TCGA-BH-A18R | EPHA8 | cna | homdel  | TCGA     |
| TCGA-BH-A1FU | EPHA8 | cna | gain    | TCGA     |
| TCGA-C8-A12L | EPHA8 | cna | hetloss | TCGA     |
| TCGA-D8-A27M | EPHA8 | cna | gain    | TCGA     |
| TCGA-E2-A1L7 | EPHA8 | cna | hetloss | TCGA     |
| TCGA-E9-A1NC | EPHA8 | cna | hetloss | TCGA     |
| TCGA-LL-A5YP | EPHA8 | cna | hetloss | TCGA     |
| MB-2827      | EPHA8 | cna | hetloss | METABRIC |
| MB-5070      | EPHA8 | cna | hetloss | METABRIC |

|              |       |     |         |          |
|--------------|-------|-----|---------|----------|
| MB-5465      | EPHA8 | cna | hetloss | METABRIC |
| MB-6060      | EPHA8 | cna | hetloss | METABRIC |
| MB-6098      | EPHA8 | cna | hetloss | METABRIC |
| MB-6271      | EPHA8 | cna | hetloss | METABRIC |
| MB-0420      | EPHA8 | cna | hetloss | METABRIC |
| PD10014      | EPHA8 | cna | gain    | BASIS    |
| PD11742      | EPHA8 | cna | hetloss | BASIS    |
| PD13296      | EPHA8 | cna | hetloss | BASIS    |
| PD13771      | EPHA8 | cna | hetloss | BASIS    |
| PD22355      | EPHA8 | cna | hetloss | BASIS    |
| PD23578      | EPHA8 | cna | gain    | BASIS    |
| PD24186      | EPHA8 | cna | gain    | BASIS    |
| PD24202      | EPHA8 | cna | hetloss | BASIS    |
| PD24206      | EPHA8 | cna | gain    | BASIS    |
| PD24337      | EPHA8 | cna | hetloss | BASIS    |
| PD3890       | EPHA8 | cna | hetloss | BASIS    |
| PD3905       | EPHA8 | cna | gain    | BASIS    |
| PD4006       | EPHA8 | cna | gain    | BASIS    |
| PD4826       | EPHA8 | cna | gain    | BASIS    |
| PD5945       | EPHA8 | cna | amp     | BASIS    |
| PD6406       | EPHA8 | cna | hetloss | BASIS    |
| PD7067       | EPHA8 | cna | gain    | BASIS    |
| PD7215       | EPHA8 | cna | gain    | BASIS    |
| PD9004       | EPHA8 | cna | hetloss | BASIS    |
| PD9585       | EPHA8 | cna | hetloss | BASIS    |
| TCGA-A2-A25B | EPHB6 | cna | gain    | TCGA     |
| TCGA-AO-A0JL | EPHB6 | cna | gain    | TCGA     |
| TCGA-BH-A0AW | EPHB6 | cna | gain    | TCGA     |
| TCGA-D8-A27M | EPHB6 | cna | gain    | TCGA     |
| TCGA-E2-A1L7 | EPHB6 | cna | hetloss | TCGA     |
| TCGA-E9-A1NC | EPHB6 | cna | hetloss | TCGA     |
| TCGA-LL-A5YP | EPHB6 | cna | gain    | TCGA     |
| MB-0346      | EPHB6 | cna | hetloss | METABRIC |
| MB-5070      | EPHB6 | cna | hetloss | METABRIC |
| MB-6098      | EPHB6 | cna | gain    | METABRIC |
| MB-7038      | EPHB6 | cna | gain    | METABRIC |
| MB-7048      | EPHB6 | cna | gain    | METABRIC |
| MB-0420      | EPHB6 | cna | hetloss | METABRIC |
| PD10014      | EPHB6 | cna | gain    | BASIS    |
| PD13296      | EPHB6 | cna | hetloss | BASIS    |
| PD13297      | EPHB6 | cna | gain    | BASIS    |
| PD13299      | EPHB6 | cna | gain    | BASIS    |
| PD22355      | EPHB6 | cna | hetloss | BASIS    |
| PD23562      | EPHB6 | cna | gain    | BASIS    |
| PD23574      | EPHB6 | cna | gain    | BASIS    |
| PD23578      | EPHB6 | cna | hetloss | BASIS    |
| PD24186      | EPHB6 | cna | amp     | BASIS    |

|              |        |     |         |          |
|--------------|--------|-----|---------|----------|
| PD24202      | EPHB6  | cna | gain    | BASIS    |
| PD24337      | EPHB6  | cna | gain    | BASIS    |
| PD3890       | EPHB6  | cna | hetloss | BASIS    |
| PD3905       | EPHB6  | cna | gain    | BASIS    |
| PD4006       | EPHB6  | cna | gain    | BASIS    |
| PD4107       | EPHB6  | cna | gain    | BASIS    |
| PD5930       | EPHB6  | cna | gain    | BASIS    |
| PD5945       | EPHB6  | cna | amp     | BASIS    |
| PD5948       | EPHB6  | cna | gain    | BASIS    |
| PD6406       | EPHB6  | cna | gain    | BASIS    |
| PD6731       | EPHB6  | cna | hetloss | BASIS    |
| PD7067       | EPHB6  | cna | gain    | BASIS    |
| PD7215       | EPHB6  | cna | gain    | BASIS    |
| PD8621       | EPHB6  | cna | gain    | BASIS    |
| PD9004       | EPHB6  | cna | gain    | BASIS    |
| PD9585       | EPHB6  | cna | gain    | BASIS    |
| PD9702       | EPHB6  | cna | gain    | BASIS    |
| TCGA-AN-A0XU | EXOSC6 | cna | gain    | TCGA     |
| TCGA-AO-A0JL | EXOSC6 | cna | gain    | TCGA     |
| TCGA-BH-A0C0 | EXOSC6 | cna | hetloss | TCGA     |
| TCGA-BH-A18R | EXOSC6 | cna | gain    | TCGA     |
| TCGA-C8-A12L | EXOSC6 | cna | hetloss | TCGA     |
| TCGA-D8-A27M | EXOSC6 | cna | gain    | TCGA     |
| TCGA-E2-A1L7 | EXOSC6 | cna | hetloss | TCGA     |
| TCGA-E9-A1NC | EXOSC6 | cna | hetloss | TCGA     |
| TCGA-LL-A5YP | EXOSC6 | cna | gain    | TCGA     |
| MB-0346      | EXOSC6 | cna | gain    | METABRIC |
| MB-2827      | EXOSC6 | cna | hetloss | METABRIC |
| MB-5107      | EXOSC6 | cna | hetloss | METABRIC |
| MB-6271      | EXOSC6 | cna | hetloss | METABRIC |
| MB-7032      | EXOSC6 | cna | gain    | METABRIC |
| MB-7038      | EXOSC6 | cna | gain    | METABRIC |
| MB-7048      | EXOSC6 | cna | hetloss | METABRIC |
| MB-0420      | EXOSC6 | cna | hetloss | METABRIC |
| MTS-T0064    | EXOSC6 | cna | hetloss | METABRIC |
| PD10014      | EXOSC6 | cna | hetloss | BASIS    |
| PD11327      | EXOSC6 | cna | homdel  | BASIS    |
| PD11742      | EXOSC6 | cna | hetloss | BASIS    |
| PD13297      | EXOSC6 | cna | hetloss | BASIS    |
| PD13299      | EXOSC6 | cna | gain    | BASIS    |
| PD14442      | EXOSC6 | cna | homdel  | BASIS    |
| PD23562      | EXOSC6 | cna | gain    | BASIS    |
| PD24186      | EXOSC6 | cna | gain    | BASIS    |
| PD24202      | EXOSC6 | cna | hetloss | BASIS    |
| PD24206      | EXOSC6 | cna | gain    | BASIS    |
| PD3890       | EXOSC6 | cna | gain    | BASIS    |
| PD3905       | EXOSC6 | cna | gain    | BASIS    |



|              |        |     |         |          |
|--------------|--------|-----|---------|----------|
| PD4005       | EXOSC6 | cna | hetloss | BASIS    |
| PD4967       | EXOSC6 | cna | homdel  | BASIS    |
| PD5945       | EXOSC6 | cna | gain    | BASIS    |
| PD5948       | EXOSC6 | cna | hetloss | BASIS    |
| PD6413       | EXOSC6 | cna | hetloss | BASIS    |
| PD7215       | EXOSC6 | cna | gain    | BASIS    |
| PD8980       | EXOSC6 | cna | hetloss | BASIS    |
| PD9585       | EXOSC6 | cna | hetloss | BASIS    |
| PD9702       | EXOSC6 | cna | gain    | BASIS    |
| TCGA-A2-A25B | FAS    | cna | hetloss | TCGA     |
| TCGA-AN-A0XU | FAS    | cna | hetloss | TCGA     |
| TCGA-AO-A0JL | FAS    | cna | hetloss | TCGA     |
| TCGA-BH-A0AW | FAS    | cna | hetloss | TCGA     |
| TCGA-BH-A18R | FAS    | cna | gain    | TCGA     |
| TCGA-C8-A12L | FAS    | cna | hetloss | TCGA     |
| TCGA-D8-A27M | FAS    | cna | hetloss | TCGA     |
| TCGA-E2-A1L7 | FAS    | cna | hetloss | TCGA     |
| MB-0346      | FAS    | cna | gain    | METABRIC |
| MB-2827      | FAS    | cna | hetloss | METABRIC |
| MB-5070      | FAS    | cna | hetloss | METABRIC |
| MB-6060      | FAS    | cna | hetloss | METABRIC |
| MB-6098      | FAS    | cna | hetloss | METABRIC |
| MB-7038      | FAS    | cna | hetloss | METABRIC |
| MB-7048      | FAS    | cna | homdel  | METABRIC |
| MTS-T0064    | FAS    | cna | amp     | METABRIC |
| PD10014      | FAS    | cna | hetloss | BASIS    |
| PD11327      | FAS    | cna | gain    | BASIS    |
| PD11742      | FAS    | cna | hetloss | BASIS    |
| PD13296      | FAS    | cna | hetloss | BASIS    |
| PD13299      | FAS    | cna | gain    | BASIS    |
| PD22355      | FAS    | cna | hetloss | BASIS    |
| PD23562      | FAS    | cna | gain    | BASIS    |
| PD23574      | FAS    | cna | gain    | BASIS    |
| PD23578      | FAS    | cna | hetloss | BASIS    |
| PD24202      | FAS    | cna | hetloss | BASIS    |
| PD3890       | FAS    | cna | hetloss | BASIS    |
| PD3905       | FAS    | cna | gain    | BASIS    |
| PD4006       | FAS    | cna | gain    | BASIS    |
| PD4107       | FAS    | cna | gain    | BASIS    |
| PD5935       | FAS    | cna | homdel  | BASIS    |
| PD5948       | FAS    | cna | hetloss | BASIS    |
| PD6406       | FAS    | cna | hetloss | BASIS    |
| PD6413       | FAS    | cna | hetloss | BASIS    |
| PD6731       | FAS    | cna | hetloss | BASIS    |
| PD7215       | FAS    | cna | gain    | BASIS    |
| PD8621       | FAS    | cna | hetloss | BASIS    |
| PD8980       | FAS    | cna | hetloss | BASIS    |

|              |       |     |         |          |
|--------------|-------|-----|---------|----------|
| PD9585       | FAS   | cna | hetloss | BASIS    |
| TCGA-A2-A25B | FAT1  | cna | gain    | TCGA     |
| TCGA-AN-A0XU | FAT1  | cna | hetloss | TCGA     |
| TCGA-BH-A0AW | FAT1  | cna | gain    | TCGA     |
| TCGA-BH-A0C0 | FAT1  | cna | hetloss | TCGA     |
| TCGA-BH-A18R | FAT1  | cna | homdel  | TCGA     |
| TCGA-C8-A12L | FAT1  | cna | hetloss | TCGA     |
| TCGA-D8-A27M | FAT1  | cna | hetloss | TCGA     |
| TCGA-E2-A1L7 | FAT1  | cna | hetloss | TCGA     |
| TCGA-E9-A1NC | FAT1  | cna | hetloss | TCGA     |
| TCGA-LL-A5YP | FAT1  | cna | hetloss | TCGA     |
| MB-2827      | FAT1  | cna | hetloss | METABRIC |
| MB-5070      | FAT1  | cna | hetloss | METABRIC |
| MB-5107      | FAT1  | cna | hetloss | METABRIC |
| MB-5465      | FAT1  | cna | hetloss | METABRIC |
| MB-7038      | FAT1  | cna | hetloss | METABRIC |
| MB-7048      | FAT1  | cna | hetloss | METABRIC |
| MB-0420      | FAT1  | cna | hetloss | METABRIC |
| PD10014      | FAT1  | cna | hetloss | BASIS    |
| PD11742      | FAT1  | cna | hetloss | BASIS    |
| PD13296      | FAT1  | cna | hetloss | BASIS    |
| PD13297      | FAT1  | cna | hetloss | BASIS    |
| PD22355      | FAT1  | cna | hetloss | BASIS    |
| PD23562      | FAT1  | cna | gain    | BASIS    |
| PD23578      | FAT1  | cna | hetloss | BASIS    |
| PD24202      | FAT1  | cna | hetloss | BASIS    |
| PD24206      | FAT1  | cna | gain    | BASIS    |
| PD24337      | FAT1  | cna | hetloss | BASIS    |
| PD3905       | FAT1  | cna | gain    | BASIS    |
| PD4005       | FAT1  | cna | hetloss | BASIS    |
| PD4107       | FAT1  | cna | hetloss | BASIS    |
| PD5930       | FAT1  | cna | gain    | BASIS    |
| PD5945       | FAT1  | cna | gain    | BASIS    |
| PD5948       | FAT1  | cna | hetloss | BASIS    |
| PD6406       | FAT1  | cna | hetloss | BASIS    |
| PD6731       | FAT1  | cna | hetloss | BASIS    |
| PD7067       | FAT1  | cna | gain    | BASIS    |
| PD7215       | FAT1  | cna | amp     | BASIS    |
| PD8980       | FAT1  | cna | hetloss | BASIS    |
| PD9585       | FAT1  | cna | hetloss | BASIS    |
| TCGA-A2-A25B | FGF12 | cna | amp     | TCGA     |
| TCGA-AN-A0XU | FGF12 | cna | gain    | TCGA     |
| TCGA-BH-A0AW | FGF12 | cna | gain    | TCGA     |
| TCGA-BH-A0C0 | FGF12 | cna | gain    | TCGA     |
| TCGA-BH-A1FU | FGF12 | cna | hetloss | TCGA     |
| TCGA-C8-A12L | FGF12 | cna | gain    | TCGA     |
| TCGA-D8-A27M | FGF12 | cna | hetloss | TCGA     |

|              |       |     |         |          |
|--------------|-------|-----|---------|----------|
| TCGA-LL-A5YP | FGF12 | cna | gain    | TCGA     |
| MB-0346      | FGF12 | cna | gain    | METABRIC |
| MB-5070      | FGF12 | cna | hetloss | METABRIC |
| MB-5107      | FGF12 | cna | amp     | METABRIC |
| MB-5465      | FGF12 | cna | gain    | METABRIC |
| MB-6060      | FGF12 | cna | gain    | METABRIC |
| MB-6098      | FGF12 | cna | gain    | METABRIC |
| MB-7038      | FGF12 | cna | hetloss | METABRIC |
| PD11327      | FGF12 | cna | gain    | BASIS    |
| PD13299      | FGF12 | cna | gain    | BASIS    |
| PD13771      | FGF12 | cna | hetloss | BASIS    |
| PD22355      | FGF12 | cna | gain    | BASIS    |
| PD23561      | FGF12 | cna | hetloss | BASIS    |
| PD23562      | FGF12 | cna | gain    | BASIS    |
| PD23578      | FGF12 | cna | gain    | BASIS    |
| PD24186      | FGF12 | cna | amp     | BASIS    |
| PD24202      | FGF12 | cna | gain    | BASIS    |
| PD3905       | FGF12 | cna | gain    | BASIS    |
| PD4005       | FGF12 | cna | gain    | BASIS    |
| PD4107       | FGF12 | cna | gain    | BASIS    |
| PD4826       | FGF12 | cna | gain    | BASIS    |
| PD5930       | FGF12 | cna | gain    | BASIS    |
| PD5945       | FGF12 | cna | amp     | BASIS    |
| PD5948       | FGF12 | cna | gain    | BASIS    |
| PD6406       | FGF12 | cna | gain    | BASIS    |
| PD6731       | FGF12 | cna | gain    | BASIS    |
| PD7067       | FGF12 | cna | gain    | BASIS    |
| PD7215       | FGF12 | cna | gain    | BASIS    |
| PD8621       | FGF12 | cna | gain    | BASIS    |
| PD8980       | FGF12 | cna | gain    | BASIS    |
| PD9004       | FGF12 | cna | gain    | BASIS    |
| PD9702       | FGF12 | cna | gain    | BASIS    |
| TCGA-A2-A25B | FGF7  | cna | amp     | TCGA     |
| TCGA-AN-A0XU | FGF7  | cna | hetloss | TCGA     |
| TCGA-AO-A0JL | FGF7  | cna | hetloss | TCGA     |
| TCGA-BH-A0C0 | FGF7  | cna | hetloss | TCGA     |
| TCGA-D8-A27M | FGF7  | cna | hetloss | TCGA     |
| TCGA-E2-A1L7 | FGF7  | cna | hetloss | TCGA     |
| TCGA-E9-A1NC | FGF7  | cna | hetloss | TCGA     |
| TCGA-LL-A5YP | FGF7  | cna | hetloss | TCGA     |
| MB-0346      | FGF7  | cna | gain    | METABRIC |
| MB-5107      | FGF7  | cna | gain    | METABRIC |
| MB-5465      | FGF7  | cna | hetloss | METABRIC |
| MB-6060      | FGF7  | cna | hetloss | METABRIC |
| MB-6098      | FGF7  | cna | hetloss | METABRIC |
| MB-7048      | FGF7  | cna | hetloss | METABRIC |
| PD10014      | FGF7  | cna | hetloss | BASIS    |

|              |      |     |         |          |
|--------------|------|-----|---------|----------|
| PD11327      | FGF7 | cna | gain    | BASIS    |
| PD11742      | FGF7 | cna | hetloss | BASIS    |
| PD13296      | FGF7 | cna | homdel  | BASIS    |
| PD13297      | FGF7 | cna | hetloss | BASIS    |
| PD22355      | FGF7 | cna | hetloss | BASIS    |
| PD24202      | FGF7 | cna | hetloss | BASIS    |
| PD24206      | FGF7 | cna | gain    | BASIS    |
| PD24337      | FGF7 | cna | hetloss | BASIS    |
| PD3890       | FGF7 | cna | hetloss | BASIS    |
| PD3905       | FGF7 | cna | gain    | BASIS    |
| PD4005       | FGF7 | cna | hetloss | BASIS    |
| PD4006       | FGF7 | cna | hetloss | BASIS    |
| PD4107       | FGF7 | cna | hetloss | BASIS    |
| PD5930       | FGF7 | cna | hetloss | BASIS    |
| PD5935       | FGF7 | cna | gain    | BASIS    |
| PD5948       | FGF7 | cna | hetloss | BASIS    |
| PD6406       | FGF7 | cna | hetloss | BASIS    |
| PD6413       | FGF7 | cna | hetloss | BASIS    |
| PD7067       | FGF7 | cna | gain    | BASIS    |
| PD7215       | FGF7 | cna | gain    | BASIS    |
| PD8621       | FGF7 | cna | hetloss | BASIS    |
| PD8980       | FGF7 | cna | hetloss | BASIS    |
| PD9585       | FGF7 | cna | hetloss | BASIS    |
| PD9702       | FGF7 | cna | gain    | BASIS    |
| TCGA-AO-A0JL | FLT3 | cna | hetloss | TCGA     |
| TCGA-BH-A0AW | FLT3 | cna | hetloss | TCGA     |
| TCGA-BH-A0C0 | FLT3 | cna | gain    | TCGA     |
| TCGA-BH-A1FU | FLT3 | cna | hetloss | TCGA     |
| TCGA-C8-A12L | FLT3 | cna | hetloss | TCGA     |
| TCGA-D8-A27M | FLT3 | cna | gain    | TCGA     |
| TCGA-E9-A1NC | FLT3 | cna | hetloss | TCGA     |
| TCGA-EW-A10X | FLT3 | cna | homdel  | TCGA     |
| TCGA-LL-A5YP | FLT3 | cna | hetloss | TCGA     |
| MB-0346      | FLT3 | cna | amp     | METABRIC |
| MB-2827      | FLT3 | cna | hetloss | METABRIC |
| MB-6098      | FLT3 | cna | hetloss | METABRIC |
| MB-7032      | FLT3 | cna | gain    | METABRIC |
| MB-0420      | FLT3 | cna | hetloss | METABRIC |
| PD10014      | FLT3 | cna | hetloss | BASIS    |
| PD11327      | FLT3 | cna | hetloss | BASIS    |
| PD13296      | FLT3 | cna | hetloss | BASIS    |
| PD13297      | FLT3 | cna | hetloss | BASIS    |
| PD13771      | FLT3 | cna | hetloss | BASIS    |
| PD14442      | FLT3 | cna | hetloss | BASIS    |
| PD22355      | FLT3 | cna | hetloss | BASIS    |
| PD23562      | FLT3 | cna | gain    | BASIS    |
| PD23578      | FLT3 | cna | hetloss | BASIS    |

|              |       |     |         |          |
|--------------|-------|-----|---------|----------|
| PD24202      | FLT3  | cna | hetloss | BASIS    |
| PD24337      | FLT3  | cna | hetloss | BASIS    |
| PD3890       | FLT3  | cna | hetloss | BASIS    |
| PD3905       | FLT3  | cna | gain    | BASIS    |
| PD4005       | FLT3  | cna | homdel  | BASIS    |
| PD4006       | FLT3  | cna | gain    | BASIS    |
| PD4107       | FLT3  | cna | gain    | BASIS    |
| PD4826       | FLT3  | cna | hetloss | BASIS    |
| PD4967       | FLT3  | cna | hetloss | BASIS    |
| PD5945       | FLT3  | cna | amp     | BASIS    |
| PD6406       | FLT3  | cna | hetloss | BASIS    |
| PD6413       | FLT3  | cna | hetloss | BASIS    |
| PD6731       | FLT3  | cna | hetloss | BASIS    |
| PD7067       | FLT3  | cna | gain    | BASIS    |
| PD8980       | FLT3  | cna | hetloss | BASIS    |
| PD9702       | FLT3  | cna | gain    | BASIS    |
| TCGA-A2-A25B | FOXA2 | cna | gain    | TCGA     |
| TCGA-AO-A0JL | FOXA2 | cna | gain    | TCGA     |
| TCGA-BH-A0AW | FOXA2 | cna | gain    | TCGA     |
| TCGA-BH-A0C0 | FOXA2 | cna | gain    | TCGA     |
| TCGA-C8-A12L | FOXA2 | cna | gain    | TCGA     |
| TCGA-D8-A27M | FOXA2 | cna | gain    | TCGA     |
| TCGA-E2-A1L7 | FOXA2 | cna | gain    | TCGA     |
| TCGA-E9-A1NC | FOXA2 | cna | hetloss | TCGA     |
| TCGA-LL-A5YP | FOXA2 | cna | gain    | TCGA     |
| MB-0346      | FOXA2 | cna | gain    | METABRIC |
| MB-5107      | FOXA2 | cna | hetloss | METABRIC |
| MB-6060      | FOXA2 | cna | gain    | METABRIC |
| MB-6098      | FOXA2 | cna | gain    | METABRIC |
| MB-7032      | FOXA2 | cna | gain    | METABRIC |
| MB-7048      | FOXA2 | cna | gain    | METABRIC |
| PD11327      | FOXA2 | cna | gain    | BASIS    |
| PD11742      | FOXA2 | cna | gain    | BASIS    |
| PD13296      | FOXA2 | cna | hetloss | BASIS    |
| PD13299      | FOXA2 | cna | gain    | BASIS    |
| PD23574      | FOXA2 | cna | gain    | BASIS    |
| PD23578      | FOXA2 | cna | hetloss | BASIS    |
| PD24186      | FOXA2 | cna | gain    | BASIS    |
| PD24202      | FOXA2 | cna | hetloss | BASIS    |
| PD24206      | FOXA2 | cna | gain    | BASIS    |
| PD24337      | FOXA2 | cna | gain    | BASIS    |
| PD3905       | FOXA2 | cna | gain    | BASIS    |
| PD4005       | FOXA2 | cna | hetloss | BASIS    |
| PD4107       | FOXA2 | cna | gain    | BASIS    |
| PD4826       | FOXA2 | cna | gain    | BASIS    |
| PD5930       | FOXA2 | cna | gain    | BASIS    |
| PD5935       | FOXA2 | cna | hetloss | BASIS    |

|              |       |     |         |          |
|--------------|-------|-----|---------|----------|
| PD5945       | FOXA2 | cna | amp     | BASIS    |
| PD5948       | FOXA2 | cna | gain    | BASIS    |
| PD7067       | FOXA2 | cna | gain    | BASIS    |
| PD7215       | FOXA2 | cna | gain    | BASIS    |
| PD8621       | FOXA2 | cna | gain    | BASIS    |
| PD8980       | FOXA2 | cna | hetloss | BASIS    |
| PD9004       | FOXA2 | cna | gain    | BASIS    |
| PD9702       | FOXA2 | cna | gain    | BASIS    |
| TCGA-A2-A25B | FOXO4 | cna | gain    | TCGA     |
| TCGA-AN-A0XU | FOXO4 | cna | hetloss | TCGA     |
| TCGA-AO-A0JL | FOXO4 | cna | gain    | TCGA     |
| TCGA-BH-A0AW | FOXO4 | cna | gain    | TCGA     |
| TCGA-C8-A12L | FOXO4 | cna | hetloss | TCGA     |
| TCGA-E2-A1L7 | FOXO4 | cna | hetloss | TCGA     |
| TCGA-E9-A1NC | FOXO4 | cna | hetloss | TCGA     |
| MB-0346      | FOXO4 | cna | hetloss | METABRIC |
| MB-2827      | FOXO4 | cna | hetloss | METABRIC |
| MB-5465      | FOXO4 | cna | gain    | METABRIC |
| MB-6060      | FOXO4 | cna | hetloss | METABRIC |
| MB-0420      | FOXO4 | cna | hetloss | METABRIC |
| PD10014      | FOXO4 | cna | hetloss | BASIS    |
| PD11327      | FOXO4 | cna | hetloss | BASIS    |
| PD13296      | FOXO4 | cna | amp     | BASIS    |
| PD13297      | FOXO4 | cna | gain    | BASIS    |
| PD13299      | FOXO4 | cna | gain    | BASIS    |
| PD13771      | FOXO4 | cna | gain    | BASIS    |
| PD14442      | FOXO4 | cna | gain    | BASIS    |
| PD23562      | FOXO4 | cna | hetloss | BASIS    |
| PD23574      | FOXO4 | cna | gain    | BASIS    |
| PD24202      | FOXO4 | cna | gain    | BASIS    |
| PD24206      | FOXO4 | cna | gain    | BASIS    |
| PD3890       | FOXO4 | cna | gain    | BASIS    |
| PD3905       | FOXO4 | cna | gain    | BASIS    |
| PD4005       | FOXO4 | cna | hetloss | BASIS    |
| PD4006       | FOXO4 | cna | gain    | BASIS    |
| PD4107       | FOXO4 | cna | amp     | BASIS    |
| PD4826       | FOXO4 | cna | gain    | BASIS    |
| PD4967       | FOXO4 | cna | gain    | BASIS    |
| PD5930       | FOXO4 | cna | gain    | BASIS    |
| PD5935       | FOXO4 | cna | gain    | BASIS    |
| PD5948       | FOXO4 | cna | gain    | BASIS    |
| PD6413       | FOXO4 | cna | gain    | BASIS    |
| PD7067       | FOXO4 | cna | gain    | BASIS    |
| PD7215       | FOXO4 | cna | amp     | BASIS    |
| PD8621       | FOXO4 | cna | amp     | BASIS    |
| PD8980       | FOXO4 | cna | gain    | BASIS    |
| PD9004       | FOXO4 | cna | gain    | BASIS    |

|              |      |     |         |          |
|--------------|------|-----|---------|----------|
| TCGA-A2-A25B | GOPC | cna | hetloss | TCGA     |
| TCGA-AN-A0XU | GOPC | cna | amp     | TCGA     |
| TCGA-AO-A0JL | GOPC | cna | hetloss | TCGA     |
| TCGA-BH-A0AW | GOPC | cna | amp     | TCGA     |
| TCGA-BH-A18R | GOPC | cna | homdel  | TCGA     |
| TCGA-C8-A12L | GOPC | cna | gain    | TCGA     |
| TCGA-D8-A27M | GOPC | cna | hetloss | TCGA     |
| MB-2827      | GOPC | cna | amp     | METABRIC |
| MB-5070      | GOPC | cna | gain    | METABRIC |
| MB-6098      | GOPC | cna | hetloss | METABRIC |
| MB-7032      | GOPC | cna | hetloss | METABRIC |
| MB-7038      | GOPC | cna | gain    | METABRIC |
| MB-7048      | GOPC | cna | hetloss | METABRIC |
| MTS-T0064    | GOPC | cna | amp     | METABRIC |
| PD11327      | GOPC | cna | gain    | BASIS    |
| PD13299      | GOPC | cna | gain    | BASIS    |
| PD13771      | GOPC | cna | hetloss | BASIS    |
| PD22355      | GOPC | cna | gain    | BASIS    |
| PD23562      | GOPC | cna | gain    | BASIS    |
| PD23574      | GOPC | cna | gain    | BASIS    |
| PD24186      | GOPC | cna | gain    | BASIS    |
| PD24206      | GOPC | cna | gain    | BASIS    |
| PD24337      | GOPC | cna | hetloss | BASIS    |
| PD3905       | GOPC | cna | gain    | BASIS    |
| PD4006       | GOPC | cna | gain    | BASIS    |
| PD4107       | GOPC | cna | hetloss | BASIS    |
| PD4826       | GOPC | cna | gain    | BASIS    |
| PD5930       | GOPC | cna | hetloss | BASIS    |
| PD5935       | GOPC | cna | gain    | BASIS    |
| PD5945       | GOPC | cna | amp     | BASIS    |
| PD6406       | GOPC | cna | hetloss | BASIS    |
| PD6731       | GOPC | cna | hetloss | BASIS    |
| PD7067       | GOPC | cna | gain    | BASIS    |
| PD7215       | GOPC | cna | gain    | BASIS    |
| PD8621       | GOPC | cna | gain    | BASIS    |
| PD8980       | GOPC | cna | gain    | BASIS    |
| PD9004       | GOPC | cna | gain    | BASIS    |
| PD9585       | GOPC | cna | hetloss | BASIS    |
| PD9702       | GOPC | cna | gain    | BASIS    |
| TCGA-AN-A0XU | GPC3 | cna | hetloss | TCGA     |
| TCGA-BH-A0AW | GPC3 | cna | gain    | TCGA     |
| TCGA-C8-A12L | GPC3 | cna | gain    | TCGA     |
| TCGA-E2-A1L7 | GPC3 | cna | hetloss | TCGA     |
| TCGA-E9-A1NC | GPC3 | cna | hetloss | TCGA     |
| TCGA-LL-A5YP | GPC3 | cna | gain    | TCGA     |
| MB-0346      | GPC3 | cna | hetloss | METABRIC |
| MB-2827      | GPC3 | cna | hetloss | METABRIC |

|              |       |     |         |          |
|--------------|-------|-----|---------|----------|
| MB-5465      | GPC3  | cna | hetloss | METABRIC |
| MB-6060      | GPC3  | cna | gain    | METABRIC |
| MB-6098      | GPC3  | cna | hetloss | METABRIC |
| MB-7038      | GPC3  | cna | gain    | METABRIC |
| MB-0420      | GPC3  | cna | hetloss | METABRIC |
| PD10014      | GPC3  | cna | hetloss | BASIS    |
| PD13296      | GPC3  | cna | amp     | BASIS    |
| PD13299      | GPC3  | cna | amp     | BASIS    |
| PD13771      | GPC3  | cna | gain    | BASIS    |
| PD14442      | GPC3  | cna | gain    | BASIS    |
| PD23562      | GPC3  | cna | hetloss | BASIS    |
| PD23574      | GPC3  | cna | gain    | BASIS    |
| PD23578      | GPC3  | cna | hetloss | BASIS    |
| PD24202      | GPC3  | cna | hetloss | BASIS    |
| PD24206      | GPC3  | cna | gain    | BASIS    |
| PD3890       | GPC3  | cna | hetloss | BASIS    |
| PD3905       | GPC3  | cna | gain    | BASIS    |
| PD4006       | GPC3  | cna | gain    | BASIS    |
| PD4107       | GPC3  | cna | gain    | BASIS    |
| PD4826       | GPC3  | cna | gain    | BASIS    |
| PD4967       | GPC3  | cna | gain    | BASIS    |
| PD5930       | GPC3  | cna | gain    | BASIS    |
| PD5935       | GPC3  | cna | gain    | BASIS    |
| PD5945       | GPC3  | cna | gain    | BASIS    |
| PD5948       | GPC3  | cna | gain    | BASIS    |
| PD6406       | GPC3  | cna | gain    | BASIS    |
| PD6413       | GPC3  | cna | gain    | BASIS    |
| PD7215       | GPC3  | cna | gain    | BASIS    |
| PD8621       | GPC3  | cna | amp     | BASIS    |
| PD8980       | GPC3  | cna | hetloss | BASIS    |
| PD9004       | GPC3  | cna | gain    | BASIS    |
| TCGA-A2-A25B | HDAC2 | cna | hetloss | TCGA     |
| TCGA-AN-A0XU | HDAC2 | cna | amp     | TCGA     |
| TCGA-AO-A0JL | HDAC2 | cna | hetloss | TCGA     |
| TCGA-BH-A0AW | HDAC2 | cna | amp     | TCGA     |
| TCGA-BH-A18R | HDAC2 | cna | gain    | TCGA     |
| TCGA-C8-A12L | HDAC2 | cna | gain    | TCGA     |
| TCGA-D8-A27M | HDAC2 | cna | hetloss | TCGA     |
| MB-2827      | HDAC2 | cna | amp     | METABRIC |
| MB-6098      | HDAC2 | cna | hetloss | METABRIC |
| MB-7032      | HDAC2 | cna | hetloss | METABRIC |
| MB-7038      | HDAC2 | cna | gain    | METABRIC |
| MB-7048      | HDAC2 | cna | hetloss | METABRIC |
| MTS-T0064    | HDAC2 | cna | amp     | METABRIC |
| PD11327      | HDAC2 | cna | gain    | BASIS    |
| PD13296      | HDAC2 | cna | gain    | BASIS    |
| PD13299      | HDAC2 | cna | gain    | BASIS    |



|              |         |     |         |          |
|--------------|---------|-----|---------|----------|
| PD13771      | HDAC2   | cna | hetloss | BASIS    |
| PD22355      | HDAC2   | cna | gain    | BASIS    |
| PD23562      | HDAC2   | cna | gain    | BASIS    |
| PD23574      | HDAC2   | cna | gain    | BASIS    |
| PD24186      | HDAC2   | cna | gain    | BASIS    |
| PD24206      | HDAC2   | cna | gain    | BASIS    |
| PD24337      | HDAC2   | cna | hetloss | BASIS    |
| PD3905       | HDAC2   | cna | gain    | BASIS    |
| PD4006       | HDAC2   | cna | gain    | BASIS    |
| PD4107       | HDAC2   | cna | hetloss | BASIS    |
| PD4826       | HDAC2   | cna | gain    | BASIS    |
| PD5930       | HDAC2   | cna | hetloss | BASIS    |
| PD5935       | HDAC2   | cna | gain    | BASIS    |
| PD5945       | HDAC2   | cna | amp     | BASIS    |
| PD6406       | HDAC2   | cna | hetloss | BASIS    |
| PD6731       | HDAC2   | cna | hetloss | BASIS    |
| PD7067       | HDAC2   | cna | gain    | BASIS    |
| PD7215       | HDAC2   | cna | gain    | BASIS    |
| PD8621       | HDAC2   | cna | gain    | BASIS    |
| PD8980       | HDAC2   | cna | gain    | BASIS    |
| PD9004       | HDAC2   | cna | gain    | BASIS    |
| PD9585       | HDAC2   | cna | hetloss | BASIS    |
| PD9702       | HDAC2   | cna | gain    | BASIS    |
| TCGA-AN-A0XU | HERPUD1 | cna | hetloss | TCGA     |
| TCGA-AO-A0JL | HERPUD1 | cna | gain    | TCGA     |
| TCGA-BH-A0AW | HERPUD1 | cna | hetloss | TCGA     |
| TCGA-BH-A0C0 | HERPUD1 | cna | hetloss | TCGA     |
| TCGA-C8-A12L | HERPUD1 | cna | gain    | TCGA     |
| TCGA-D8-A27M | HERPUD1 | cna | gain    | TCGA     |
| TCGA-E2-A1L7 | HERPUD1 | cna | hetloss | TCGA     |
| TCGA-LL-A5YP | HERPUD1 | cna | gain    | TCGA     |
| MB-0346      | HERPUD1 | cna | gain    | METABRIC |
| MB-5070      | HERPUD1 | cna | hetloss | METABRIC |
| MB-5107      | HERPUD1 | cna | hetloss | METABRIC |
| MB-6271      | HERPUD1 | cna | hetloss | METABRIC |
| MB-7032      | HERPUD1 | cna | gain    | METABRIC |
| MB-7048      | HERPUD1 | cna | hetloss | METABRIC |
| MB-0420      | HERPUD1 | cna | hetloss | METABRIC |
| MTS-T0064    | HERPUD1 | cna | hetloss | METABRIC |
| PD10014      | HERPUD1 | cna | hetloss | BASIS    |
| PD11327      | HERPUD1 | cna | hetloss | BASIS    |
| PD11742      | HERPUD1 | cna | hetloss | BASIS    |
| PD13296      | HERPUD1 | cna | hetloss | BASIS    |
| PD13297      | HERPUD1 | cna | hetloss | BASIS    |
| PD13299      | HERPUD1 | cna | gain    | BASIS    |
| PD14442      | HERPUD1 | cna | hetloss | BASIS    |
| PD22355      | HERPUD1 | cna | hetloss | BASIS    |

|              |         |     |         |          |
|--------------|---------|-----|---------|----------|
| PD23562      | HERPUD1 | cna | gain    | BASIS    |
| PD24186      | HERPUD1 | cna | gain    | BASIS    |
| PD24202      | HERPUD1 | cna | hetloss | BASIS    |
| PD24206      | HERPUD1 | cna | gain    | BASIS    |
| PD24337      | HERPUD1 | cna | hetloss | BASIS    |
| PD3905       | HERPUD1 | cna | gain    | BASIS    |
| PD4005       | HERPUD1 | cna | hetloss | BASIS    |
| PD4967       | HERPUD1 | cna | hetloss | BASIS    |
| PD5945       | HERPUD1 | cna | amp     | BASIS    |
| PD5948       | HERPUD1 | cna | hetloss | BASIS    |
| PD7067       | HERPUD1 | cna | gain    | BASIS    |
| PD7215       | HERPUD1 | cna | gain    | BASIS    |
| PD8980       | HERPUD1 | cna | gain    | BASIS    |
| PD9585       | HERPUD1 | cna | hetloss | BASIS    |
| PD9702       | HERPUD1 | cna | gain    | BASIS    |
| TCGA-A2-A25B | IFNGR1  | cna | hetloss | TCGA     |
| TCGA-AN-A0XU | IFNGR1  | cna | amp     | TCGA     |
| TCGA-AO-A0JL | IFNGR1  | cna | hetloss | TCGA     |
| TCGA-BH-A0AW | IFNGR1  | cna | amp     | TCGA     |
| TCGA-BH-A0C0 | IFNGR1  | cna | gain    | TCGA     |
| TCGA-BH-A18R | IFNGR1  | cna | amp     | TCGA     |
| TCGA-C8-A12L | IFNGR1  | cna | gain    | TCGA     |
| TCGA-D8-A27M | IFNGR1  | cna | hetloss | TCGA     |
| MB-5070      | IFNGR1  | cna | amp     | METABRIC |
| MB-6098      | IFNGR1  | cna | hetloss | METABRIC |
| MB-7032      | IFNGR1  | cna | hetloss | METABRIC |
| MB-7038      | IFNGR1  | cna | amp     | METABRIC |
| MB-7048      | IFNGR1  | cna | hetloss | METABRIC |
| MB-0420      | IFNGR1  | cna | hetloss | METABRIC |
| PD11327      | IFNGR1  | cna | gain    | BASIS    |
| PD13299      | IFNGR1  | cna | gain    | BASIS    |
| PD13771      | IFNGR1  | cna | hetloss | BASIS    |
| PD22355      | IFNGR1  | cna | gain    | BASIS    |
| PD23562      | IFNGR1  | cna | gain    | BASIS    |
| PD23574      | IFNGR1  | cna | gain    | BASIS    |
| PD24186      | IFNGR1  | cna | gain    | BASIS    |
| PD24202      | IFNGR1  | cna | gain    | BASIS    |
| PD24206      | IFNGR1  | cna | gain    | BASIS    |
| PD3890       | IFNGR1  | cna | gain    | BASIS    |
| PD3905       | IFNGR1  | cna | gain    | BASIS    |
| PD4006       | IFNGR1  | cna | hetloss | BASIS    |
| PD4107       | IFNGR1  | cna | amp     | BASIS    |
| PD4826       | IFNGR1  | cna | gain    | BASIS    |
| PD5935       | IFNGR1  | cna | gain    | BASIS    |
| PD5945       | IFNGR1  | cna | amp     | BASIS    |
| PD6406       | IFNGR1  | cna | hetloss | BASIS    |
| PD6731       | IFNGR1  | cna | hetloss | BASIS    |

|              |        |     |         |          |
|--------------|--------|-----|---------|----------|
| PD7067       | IFNGR1 | cna | amp     | BASIS    |
| PD7215       | IFNGR1 | cna | gain    | BASIS    |
| PD8621       | IFNGR1 | cna | gain    | BASIS    |
| PD8980       | IFNGR1 | cna | gain    | BASIS    |
| PD9004       | IFNGR1 | cna | homdel  | BASIS    |
| PD9585       | IFNGR1 | cna | hetloss | BASIS    |
| PD9702       | IFNGR1 | cna | gain    | BASIS    |
| TCGA-AN-A0XU | IRF8   | cna | amp     | TCGA     |
| TCGA-AO-A0JL | IRF8   | cna | gain    | TCGA     |
| TCGA-BH-A0AW | IRF8   | cna | hetloss | TCGA     |
| TCGA-BH-A0C0 | IRF8   | cna | hetloss | TCGA     |
| TCGA-C8-A12L | IRF8   | cna | hetloss | TCGA     |
| TCGA-D8-A27M | IRF8   | cna | gain    | TCGA     |
| TCGA-E2-A1L7 | IRF8   | cna | hetloss | TCGA     |
| TCGA-E9-A1NC | IRF8   | cna | hetloss | TCGA     |
| TCGA-LL-A5YP | IRF8   | cna | gain    | TCGA     |
| MB-0346      | IRF8   | cna | amp     | METABRIC |
| MB-5107      | IRF8   | cna | hetloss | METABRIC |
| MB-5465      | IRF8   | cna | hetloss | METABRIC |
| MB-6271      | IRF8   | cna | hetloss | METABRIC |
| MB-7032      | IRF8   | cna | hetloss | METABRIC |
| MB-7038      | IRF8   | cna | amp     | METABRIC |
| MB-7048      | IRF8   | cna | hetloss | METABRIC |
| MB-0420      | IRF8   | cna | hetloss | METABRIC |
| PD10014      | IRF8   | cna | hetloss | BASIS    |
| PD11327      | IRF8   | cna | gain    | BASIS    |
| PD11742      | IRF8   | cna | hetloss | BASIS    |
| PD13297      | IRF8   | cna | hetloss | BASIS    |
| PD13299      | IRF8   | cna | gain    | BASIS    |
| PD14442      | IRF8   | cna | hetloss | BASIS    |
| PD23562      | IRF8   | cna | gain    | BASIS    |
| PD23574      | IRF8   | cna | gain    | BASIS    |
| PD24202      | IRF8   | cna | hetloss | BASIS    |
| PD3890       | IRF8   | cna | gain    | BASIS    |
| PD3905       | IRF8   | cna | gain    | BASIS    |
| PD4005       | IRF8   | cna | hetloss | BASIS    |
| PD4006       | IRF8   | cna | hetloss | BASIS    |
| PD4107       | IRF8   | cna | gain    | BASIS    |
| PD4967       | IRF8   | cna | hetloss | BASIS    |
| PD5945       | IRF8   | cna | gain    | BASIS    |
| PD5948       | IRF8   | cna | gain    | BASIS    |
| PD7215       | IRF8   | cna | gain    | BASIS    |
| PD8621       | IRF8   | cna | gain    | BASIS    |
| PD9004       | IRF8   | cna | gain    | BASIS    |
| PD9585       | IRF8   | cna | hetloss | BASIS    |
| PD9702       | IRF8   | cna | gain    | BASIS    |
| TCGA-AN-A0XU | LASP1  | cna | hetloss | TCGA     |

|              |       |     |         |          |
|--------------|-------|-----|---------|----------|
| TCGA-AO-A0JL | LASP1 | cna | amp     | TCGA     |
| TCGA-BH-A0AW | LASP1 | cna | amp     | TCGA     |
| TCGA-BH-A0C0 | LASP1 | cna | gain    | TCGA     |
| TCGA-BH-A18R | LASP1 | cna | homdel  | TCGA     |
| TCGA-C8-A12L | LASP1 | cna | hetloss | TCGA     |
| TCGA-D8-A27M | LASP1 | cna | hetloss | TCGA     |
| TCGA-E2-A1L7 | LASP1 | cna | hetloss | TCGA     |
| TCGA-E9-A1NC | LASP1 | cna | hetloss | TCGA     |
| MB-0346      | LASP1 | cna | hetloss | METABRIC |
| MB-2827      | LASP1 | cna | hetloss | METABRIC |
| MB-5070      | LASP1 | cna | gain    | METABRIC |
| MB-5465      | LASP1 | cna | hetloss | METABRIC |
| MB-6060      | LASP1 | cna | amp     | METABRIC |
| MB-6098      | LASP1 | cna | hetloss | METABRIC |
| MB-6271      | LASP1 | cna | hetloss | METABRIC |
| MB-7038      | LASP1 | cna | hetloss | METABRIC |
| MB-0420      | LASP1 | cna | hetloss | METABRIC |
| PD13297      | LASP1 | cna | hetloss | BASIS    |
| PD13299      | LASP1 | cna | gain    | BASIS    |
| PD23561      | LASP1 | cna | amp     | BASIS    |
| PD23562      | LASP1 | cna | gain    | BASIS    |
| PD24186      | LASP1 | cna | gain    | BASIS    |
| PD24206      | LASP1 | cna | homdel  | BASIS    |
| PD24337      | LASP1 | cna | hetloss | BASIS    |
| PD3890       | LASP1 | cna | hetloss | BASIS    |
| PD3905       | LASP1 | cna | gain    | BASIS    |
| PD4005       | LASP1 | cna | hetloss | BASIS    |
| PD4826       | LASP1 | cna | amp     | BASIS    |
| PD4967       | LASP1 | cna | hetloss | BASIS    |
| PD5945       | LASP1 | cna | amp     | BASIS    |
| PD5948       | LASP1 | cna | gain    | BASIS    |
| PD6406       | LASP1 | cna | hetloss | BASIS    |
| PD6731       | LASP1 | cna | hetloss | BASIS    |
| PD7067       | LASP1 | cna | gain    | BASIS    |
| PD7215       | LASP1 | cna | gain    | BASIS    |
| PD9004       | LASP1 | cna | gain    | BASIS    |
| PD9585       | LASP1 | cna | hetloss | BASIS    |
| PD9702       | LASP1 | cna | gain    | BASIS    |
| TCGA-AN-A0XU | LHFP  | cna | hetloss | TCGA     |
| TCGA-AO-A0JL | LHFP  | cna | hetloss | TCGA     |
| TCGA-BH-A0AW | LHFP  | cna | hetloss | TCGA     |
| TCGA-BH-A0C0 | LHFP  | cna | hetloss | TCGA     |
| TCGA-BH-A1FU | LHFP  | cna | hetloss | TCGA     |
| TCGA-C8-A12L | LHFP  | cna | hetloss | TCGA     |
| TCGA-EW-A10X | LHFP  | cna | homdel  | TCGA     |
| TCGA-LL-A5YP | LHFP  | cna | homdel  | TCGA     |
| MB-0346      | LHFP  | cna | hetloss | METABRIC |

|              |        |     |         |          |
|--------------|--------|-----|---------|----------|
| MB-2827      | LHFP   | cna | hetloss | METABRIC |
| MB-5107      | LHFP   | cna | hetloss | METABRIC |
| MB-6098      | LHFP   | cna | hetloss | METABRIC |
| MB-7032      | LHFP   | cna | hetloss | METABRIC |
| MB-7048      | LHFP   | cna | hetloss | METABRIC |
| MB-0420      | LHFP   | cna | hetloss | METABRIC |
| MTS-T0064    | LHFP   | cna | hetloss | METABRIC |
| PD10014      | LHFP   | cna | hetloss | BASIS    |
| PD13296      | LHFP   | cna | hetloss | BASIS    |
| PD13297      | LHFP   | cna | hetloss | BASIS    |
| PD13771      | LHFP   | cna | hetloss | BASIS    |
| PD14442      | LHFP   | cna | hetloss | BASIS    |
| PD22355      | LHFP   | cna | hetloss | BASIS    |
| PD23574      | LHFP   | cna | hetloss | BASIS    |
| PD24202      | LHFP   | cna | hetloss | BASIS    |
| PD24206      | LHFP   | cna | gain    | BASIS    |
| PD3890       | LHFP   | cna | hetloss | BASIS    |
| PD3905       | LHFP   | cna | gain    | BASIS    |
| PD4005       | LHFP   | cna | homdel  | BASIS    |
| PD4006       | LHFP   | cna | hetloss | BASIS    |
| PD4826       | LHFP   | cna | hetloss | BASIS    |
| PD4967       | LHFP   | cna | hetloss | BASIS    |
| PD5945       | LHFP   | cna | amp     | BASIS    |
| PD6406       | LHFP   | cna | hetloss | BASIS    |
| PD6731       | LHFP   | cna | hetloss | BASIS    |
| PD7215       | LHFP   | cna | gain    | BASIS    |
| PD8621       | LHFP   | cna | hetloss | BASIS    |
| PD8980       | LHFP   | cna | hetloss | BASIS    |
| PD9585       | LHFP   | cna | gain    | BASIS    |
| PD9702       | LHFP   | cna | gain    | BASIS    |
| TCGA-AN-A0XU | MAP3K1 | cna | hetloss | TCGA     |
| TCGA-AO-A0JL | MAP3K1 | cna | hetloss | TCGA     |
| TCGA-BH-A0C0 | MAP3K1 | cna | hetloss | TCGA     |
| TCGA-BH-A1FU | MAP3K1 | cna | hetloss | TCGA     |
| TCGA-C8-A12L | MAP3K1 | cna | hetloss | TCGA     |
| TCGA-E2-A1L7 | MAP3K1 | cna | hetloss | TCGA     |
| TCGA-E9-A1NC | MAP3K1 | cna | hetloss | TCGA     |
| TCGA-LL-A5YP | MAP3K1 | cna | hetloss | TCGA     |
| MB-0346      | MAP3K1 | cna | gain    | METABRIC |
| MB-2827      | MAP3K1 | cna | hetloss | METABRIC |
| MB-5107      | MAP3K1 | cna | hetloss | METABRIC |
| MB-5465      | MAP3K1 | cna | hetloss | METABRIC |
| MB-6060      | MAP3K1 | cna | hetloss | METABRIC |
| MB-6098      | MAP3K1 | cna | gain    | METABRIC |
| MB-0420      | MAP3K1 | cna | hetloss | METABRIC |
| PD10014      | MAP3K1 | cna | hetloss | BASIS    |
| PD11327      | MAP3K1 | cna | hetloss | BASIS    |

|              |        |     |         |          |
|--------------|--------|-----|---------|----------|
| PD11742      | MAP3K1 | cna | hetloss | BASIS    |
| PD13296      | MAP3K1 | cna | hetloss | BASIS    |
| PD13297      | MAP3K1 | cna | hetloss | BASIS    |
| PD13771      | MAP3K1 | cna | hetloss | BASIS    |
| PD23562      | MAP3K1 | cna | hetloss | BASIS    |
| PD23578      | MAP3K1 | cna | hetloss | BASIS    |
| PD24186      | MAP3K1 | cna | gain    | BASIS    |
| PD24202      | MAP3K1 | cna | hetloss | BASIS    |
| PD24206      | MAP3K1 | cna | gain    | BASIS    |
| PD3890       | MAP3K1 | cna | hetloss | BASIS    |
| PD3905       | MAP3K1 | cna | gain    | BASIS    |
| PD4005       | MAP3K1 | cna | hetloss | BASIS    |
| PD4006       | MAP3K1 | cna | hetloss | BASIS    |
| PD4107       | MAP3K1 | cna | hetloss | BASIS    |
| PD5930       | MAP3K1 | cna | hetloss | BASIS    |
| PD5935       | MAP3K1 | cna | hetloss | BASIS    |
| PD5948       | MAP3K1 | cna | hetloss | BASIS    |
| PD6413       | MAP3K1 | cna | hetloss | BASIS    |
| PD7215       | MAP3K1 | cna | hetloss | BASIS    |
| PD8621       | MAP3K1 | cna | hetloss | BASIS    |
| PD8980       | MAP3K1 | cna | hetloss | BASIS    |
| PD9004       | MAP3K1 | cna | gain    | BASIS    |
| TCGA-A2-A25B | MEF2A  | cna | amp     | TCGA     |
| TCGA-AN-A0XU | MEF2A  | cna | gain    | TCGA     |
| TCGA-AO-A0JL | MEF2A  | cna | hetloss | TCGA     |
| TCGA-BH-A0C0 | MEF2A  | cna | gain    | TCGA     |
| TCGA-D8-A27M | MEF2A  | cna | hetloss | TCGA     |
| TCGA-E2-A1L7 | MEF2A  | cna | gain    | TCGA     |
| TCGA-LL-A5YP | MEF2A  | cna | gain    | TCGA     |
| MB-0346      | MEF2A  | cna | hetloss | METABRIC |
| MB-2827      | MEF2A  | cna | amp     | METABRIC |
| MB-5070      | MEF2A  | cna | gain    | METABRIC |
| MB-5465      | MEF2A  | cna | hetloss | METABRIC |
| MB-6060      | MEF2A  | cna | hetloss | METABRIC |
| MB-7038      | MEF2A  | cna | gain    | METABRIC |
| MB-7048      | MEF2A  | cna | gain    | METABRIC |
| MB-0420      | MEF2A  | cna | gain    | METABRIC |
| MTS-T0064    | MEF2A  | cna | gain    | METABRIC |
| PD10014      | MEF2A  | cna | gain    | BASIS    |
| PD11327      | MEF2A  | cna | gain    | BASIS    |
| PD11742      | MEF2A  | cna | hetloss | BASIS    |
| PD13296      | MEF2A  | cna | gain    | BASIS    |
| PD13299      | MEF2A  | cna | amp     | BASIS    |
| PD23562      | MEF2A  | cna | gain    | BASIS    |
| PD23574      | MEF2A  | cna | gain    | BASIS    |
| PD23578      | MEF2A  | cna | gain    | BASIS    |
| PD24202      | MEF2A  | cna | hetloss | BASIS    |

|              |       |     |         |          |
|--------------|-------|-----|---------|----------|
| PD24206      | MEF2A | cna | gain    | BASIS    |
| PD24337      | MEF2A | cna | gain    | BASIS    |
| PD3890       | MEF2A | cna | hetloss | BASIS    |
| PD3905       | MEF2A | cna | gain    | BASIS    |
| PD4006       | MEF2A | cna | amp     | BASIS    |
| PD4107       | MEF2A | cna | gain    | BASIS    |
| PD5930       | MEF2A | cna | gain    | BASIS    |
| PD5945       | MEF2A | cna | amp     | BASIS    |
| PD5948       | MEF2A | cna | gain    | BASIS    |
| PD6413       | MEF2A | cna | hetloss | BASIS    |
| PD7067       | MEF2A | cna | gain    | BASIS    |
| PD8621       | MEF2A | cna | gain    | BASIS    |
| PD8980       | MEF2A | cna | gain    | BASIS    |
| PD9585       | MEF2A | cna | hetloss | BASIS    |
| TCGA-AN-A0XU | MLLT6 | cna | hetloss | TCGA     |
| TCGA-AO-A0JL | MLLT6 | cna | amp     | TCGA     |
| TCGA-BH-A0AW | MLLT6 | cna | amp     | TCGA     |
| TCGA-BH-A0C0 | MLLT6 | cna | gain    | TCGA     |
| TCGA-BH-A18R | MLLT6 | cna | homdel  | TCGA     |
| TCGA-C8-A12L | MLLT6 | cna | hetloss | TCGA     |
| TCGA-D8-A27M | MLLT6 | cna | hetloss | TCGA     |
| TCGA-E2-A1L7 | MLLT6 | cna | hetloss | TCGA     |
| TCGA-E9-A1NC | MLLT6 | cna | hetloss | TCGA     |
| MB-0346      | MLLT6 | cna | hetloss | METABRIC |
| MB-2827      | MLLT6 | cna | hetloss | METABRIC |
| MB-5070      | MLLT6 | cna | gain    | METABRIC |
| MB-5465      | MLLT6 | cna | hetloss | METABRIC |
| MB-6060      | MLLT6 | cna | amp     | METABRIC |
| MB-6098      | MLLT6 | cna | hetloss | METABRIC |
| MB-6271      | MLLT6 | cna | hetloss | METABRIC |
| MB-7038      | MLLT6 | cna | hetloss | METABRIC |
| MB-0420      | MLLT6 | cna | hetloss | METABRIC |
| PD13297      | MLLT6 | cna | hetloss | BASIS    |
| PD13299      | MLLT6 | cna | gain    | BASIS    |
| PD23561      | MLLT6 | cna | amp     | BASIS    |
| PD23562      | MLLT6 | cna | gain    | BASIS    |
| PD24186      | MLLT6 | cna | gain    | BASIS    |
| PD24206      | MLLT6 | cna | hetloss | BASIS    |
| PD24337      | MLLT6 | cna | hetloss | BASIS    |
| PD3890       | MLLT6 | cna | hetloss | BASIS    |
| PD3905       | MLLT6 | cna | gain    | BASIS    |
| PD4005       | MLLT6 | cna | hetloss | BASIS    |
| PD4826       | MLLT6 | cna | amp     | BASIS    |
| PD4967       | MLLT6 | cna | hetloss | BASIS    |
| PD5945       | MLLT6 | cna | amp     | BASIS    |
| PD5948       | MLLT6 | cna | gain    | BASIS    |
| PD6406       | MLLT6 | cna | hetloss | BASIS    |

|              |        |     |         |          |
|--------------|--------|-----|---------|----------|
| PD6731       | MLLT6  | cna | hetloss | BASIS    |
| PD7067       | MLLT6  | cna | gain    | BASIS    |
| PD7215       | MLLT6  | cna | gain    | BASIS    |
| PD9004       | MLLT6  | cna | gain    | BASIS    |
| PD9585       | MLLT6  | cna | hetloss | BASIS    |
| PD9702       | MLLT6  | cna | gain    | BASIS    |
| TCGA-AN-A0XU | MLST8  | cna | hetloss | TCGA     |
| TCGA-AO-A0JL | MLST8  | cna | gain    | TCGA     |
| TCGA-BH-A0AW | MLST8  | cna | gain    | TCGA     |
| TCGA-BH-A0C0 | MLST8  | cna | gain    | TCGA     |
| TCGA-C8-A12L | MLST8  | cna | gain    | TCGA     |
| TCGA-E2-A1L7 | MLST8  | cna | gain    | TCGA     |
| TCGA-E9-A1NC | MLST8  | cna | hetloss | TCGA     |
| TCGA-LL-A5YP | MLST8  | cna | gain    | TCGA     |
| MB-0346      | MLST8  | cna | hetloss | METABRIC |
| MB-5465      | MLST8  | cna | hetloss | METABRIC |
| MB-6271      | MLST8  | cna | gain    | METABRIC |
| MB-7032      | MLST8  | cna | gain    | METABRIC |
| PD10014      | MLST8  | cna | gain    | BASIS    |
| PD11327      | MLST8  | cna | gain    | BASIS    |
| PD11742      | MLST8  | cna | gain    | BASIS    |
| PD13296      | MLST8  | cna | gain    | BASIS    |
| PD13297      | MLST8  | cna | hetloss | BASIS    |
| PD13299      | MLST8  | cna | gain    | BASIS    |
| PD22355      | MLST8  | cna | hetloss | BASIS    |
| PD23578      | MLST8  | cna | hetloss | BASIS    |
| PD24202      | MLST8  | cna | hetloss | BASIS    |
| PD24337      | MLST8  | cna | hetloss | BASIS    |
| PD3905       | MLST8  | cna | gain    | BASIS    |
| PD4005       | MLST8  | cna | gain    | BASIS    |
| PD4006       | MLST8  | cna | gain    | BASIS    |
| PD4107       | MLST8  | cna | gain    | BASIS    |
| PD4826       | MLST8  | cna | gain    | BASIS    |
| PD4967       | MLST8  | cna | gain    | BASIS    |
| PD5930       | MLST8  | cna | gain    | BASIS    |
| PD5935       | MLST8  | cna | gain    | BASIS    |
| PD5945       | MLST8  | cna | gain    | BASIS    |
| PD5948       | MLST8  | cna | gain    | BASIS    |
| PD6413       | MLST8  | cna | gain    | BASIS    |
| PD7067       | MLST8  | cna | gain    | BASIS    |
| PD7215       | MLST8  | cna | amp     | BASIS    |
| PD8621       | MLST8  | cna | gain    | BASIS    |
| PD9004       | MLST8  | cna | gain    | BASIS    |
| PD9585       | MLST8  | cna | hetloss | BASIS    |
| PD9702       | MLST8  | cna | gain    | BASIS    |
| TCGA-A2-A25B | NFKBIA | cna | amp     | TCGA     |
| TCGA-AN-A0XU | NFKBIA | cna | hetloss | TCGA     |



|              |        |     |         |          |
|--------------|--------|-----|---------|----------|
| TCGA-AO-A0JL | NFKBIA | cna | hetloss | TCGA     |
| TCGA-BH-A0AW | NFKBIA | cna | hetloss | TCGA     |
| TCGA-BH-A1FU | NFKBIA | cna | gain    | TCGA     |
| TCGA-D8-A27M | NFKBIA | cna | hetloss | TCGA     |
| TCGA-LL-A5YP | NFKBIA | cna | hetloss | TCGA     |
| MB-0346      | NFKBIA | cna | gain    | METABRIC |
| MB-2827      | NFKBIA | cna | hetloss | METABRIC |
| MB-5070      | NFKBIA | cna | hetloss | METABRIC |
| MB-5465      | NFKBIA | cna | hetloss | METABRIC |
| MB-6060      | NFKBIA | cna | gain    | METABRIC |
| MB-7038      | NFKBIA | cna | gain    | METABRIC |
| PD10014      | NFKBIA | cna | hetloss | BASIS    |
| PD11327      | NFKBIA | cna | homdel  | BASIS    |
| PD22355      | NFKBIA | cna | hetloss | BASIS    |
| PD23578      | NFKBIA | cna | hetloss | BASIS    |
| PD24186      | NFKBIA | cna | gain    | BASIS    |
| PD24202      | NFKBIA | cna | hetloss | BASIS    |
| PD24206      | NFKBIA | cna | amp     | BASIS    |
| PD24337      | NFKBIA | cna | hetloss | BASIS    |
| PD3890       | NFKBIA | cna | hetloss | BASIS    |
| PD3905       | NFKBIA | cna | gain    | BASIS    |
| PD4005       | NFKBIA | cna | hetloss | BASIS    |
| PD4006       | NFKBIA | cna | hetloss | BASIS    |
| PD4107       | NFKBIA | cna | hetloss | BASIS    |
| PD4826       | NFKBIA | cna | gain    | BASIS    |
| PD4967       | NFKBIA | cna | hetloss | BASIS    |
| PD5930       | NFKBIA | cna | hetloss | BASIS    |
| PD5945       | NFKBIA | cna | gain    | BASIS    |
| PD5948       | NFKBIA | cna | gain    | BASIS    |
| PD6406       | NFKBIA | cna | hetloss | BASIS    |
| PD7067       | NFKBIA | cna | gain    | BASIS    |
| PD7215       | NFKBIA | cna | gain    | BASIS    |
| PD8621       | NFKBIA | cna | gain    | BASIS    |
| PD8980       | NFKBIA | cna | gain    | BASIS    |
| PD9004       | NFKBIA | cna | gain    | BASIS    |
| PD9585       | NFKBIA | cna | gain    | BASIS    |
| PD9702       | NFKBIA | cna | gain    | BASIS    |
| TCGA-A2-A25B | NIN    | cna | hetloss | TCGA     |
| TCGA-AN-A0XU | NIN    | cna | gain    | TCGA     |
| TCGA-AO-A0JL | NIN    | cna | hetloss | TCGA     |
| TCGA-BH-A0AW | NIN    | cna | hetloss | TCGA     |
| TCGA-BH-A1FU | NIN    | cna | gain    | TCGA     |
| TCGA-C8-A12L | NIN    | cna | hetloss | TCGA     |
| TCGA-D8-A27M | NIN    | cna | hetloss | TCGA     |
| TCGA-LL-A5YP | NIN    | cna | hetloss | TCGA     |
| MB-2827      | NIN    | cna | hetloss | METABRIC |
| MB-5070      | NIN    | cna | hetloss | METABRIC |

|              |      |     |         |          |
|--------------|------|-----|---------|----------|
| MB-5465      | NIN  | cna | hetloss | METABRIC |
| MB-6060      | NIN  | cna | gain    | METABRIC |
| PD10014      | NIN  | cna | hetloss | BASIS    |
| PD11327      | NIN  | cna | homdel  | BASIS    |
| PD13296      | NIN  | cna | hetloss | BASIS    |
| PD13297      | NIN  | cna | hetloss | BASIS    |
| PD13299      | NIN  | cna | hetloss | BASIS    |
| PD22355      | NIN  | cna | hetloss | BASIS    |
| PD23578      | NIN  | cna | hetloss | BASIS    |
| PD24186      | NIN  | cna | gain    | BASIS    |
| PD24202      | NIN  | cna | hetloss | BASIS    |
| PD24206      | NIN  | cna | gain    | BASIS    |
| PD24337      | NIN  | cna | hetloss | BASIS    |
| PD3890       | NIN  | cna | hetloss | BASIS    |
| PD3905       | NIN  | cna | gain    | BASIS    |
| PD4005       | NIN  | cna | hetloss | BASIS    |
| PD4006       | NIN  | cna | hetloss | BASIS    |
| PD4107       | NIN  | cna | hetloss | BASIS    |
| PD4967       | NIN  | cna | hetloss | BASIS    |
| PD5930       | NIN  | cna | hetloss | BASIS    |
| PD5945       | NIN  | cna | gain    | BASIS    |
| PD6406       | NIN  | cna | hetloss | BASIS    |
| PD7067       | NIN  | cna | gain    | BASIS    |
| PD7215       | NIN  | cna | gain    | BASIS    |
| PD8621       | NIN  | cna | hetloss | BASIS    |
| PD8980       | NIN  | cna | gain    | BASIS    |
| PD9004       | NIN  | cna | gain    | BASIS    |
| PD9585       | NIN  | cna | gain    | BASIS    |
| PD9702       | NIN  | cna | gain    | BASIS    |
| TCGA-A2-A25B | OTX2 | cna | hetloss | TCGA     |
| TCGA-AO-A0JL | OTX2 | cna | hetloss | TCGA     |
| TCGA-BH-A0AW | OTX2 | cna | hetloss | TCGA     |
| TCGA-BH-A1FU | OTX2 | cna | gain    | TCGA     |
| TCGA-C8-A12L | OTX2 | cna | hetloss | TCGA     |
| TCGA-D8-A27M | OTX2 | cna | hetloss | TCGA     |
| TCGA-LL-A5YP | OTX2 | cna | hetloss | TCGA     |
| MB-2827      | OTX2 | cna | hetloss | METABRIC |
| MB-5070      | OTX2 | cna | hetloss | METABRIC |
| MB-5465      | OTX2 | cna | hetloss | METABRIC |
| MB-6060      | OTX2 | cna | gain    | METABRIC |
| MB-6098      | OTX2 | cna | hetloss | METABRIC |
| MB-7038      | OTX2 | cna | hetloss | METABRIC |
| PD10014      | OTX2 | cna | hetloss | BASIS    |
| PD11327      | OTX2 | cna | gain    | BASIS    |
| PD13296      | OTX2 | cna | hetloss | BASIS    |
| PD13297      | OTX2 | cna | hetloss | BASIS    |
| PD22355      | OTX2 | cna | hetloss | BASIS    |

|              |          |     |         |          |
|--------------|----------|-----|---------|----------|
| PD23574      | OTX2     | cna | hetloss | BASIS    |
| PD23578      | OTX2     | cna | hetloss | BASIS    |
| PD24202      | OTX2     | cna | hetloss | BASIS    |
| PD24206      | OTX2     | cna | hetloss | BASIS    |
| PD24337      | OTX2     | cna | hetloss | BASIS    |
| PD3890       | OTX2     | cna | hetloss | BASIS    |
| PD3905       | OTX2     | cna | gain    | BASIS    |
| PD4005       | OTX2     | cna | hetloss | BASIS    |
| PD4006       | OTX2     | cna | hetloss | BASIS    |
| PD4107       | OTX2     | cna | hetloss | BASIS    |
| PD5930       | OTX2     | cna | hetloss | BASIS    |
| PD5945       | OTX2     | cna | gain    | BASIS    |
| PD5948       | OTX2     | cna | hetloss | BASIS    |
| PD6406       | OTX2     | cna | hetloss | BASIS    |
| PD7067       | OTX2     | cna | gain    | BASIS    |
| PD7215       | OTX2     | cna | hetloss | BASIS    |
| PD8621       | OTX2     | cna | hetloss | BASIS    |
| PD8980       | OTX2     | cna | gain    | BASIS    |
| PD9004       | OTX2     | cna | gain    | BASIS    |
| PD9585       | OTX2     | cna | gain    | BASIS    |
| PD9702       | OTX2     | cna | gain    | BASIS    |
| TCGA-A2-A25B | PAFAH1B2 | cna | hetloss | TCGA     |
| TCGA-AN-A0XU | PAFAH1B2 | cna | gain    | TCGA     |
| TCGA-AO-A0JL | PAFAH1B2 | cna | hetloss | TCGA     |
| TCGA-BH-A0C0 | PAFAH1B2 | cna | hetloss | TCGA     |
| TCGA-BH-A18R | PAFAH1B2 | cna | homdel  | TCGA     |
| TCGA-D8-A27M | PAFAH1B2 | cna | hetloss | TCGA     |
| TCGA-E2-A1L7 | PAFAH1B2 | cna | hetloss | TCGA     |
| TCGA-E9-A1NC | PAFAH1B2 | cna | hetloss | TCGA     |
| TCGA-EW-A10X | PAFAH1B2 | cna | homdel  | TCGA     |
| TCGA-LL-A5YP | PAFAH1B2 | cna | hetloss | TCGA     |
| MB-0346      | PAFAH1B2 | cna | hetloss | METABRIC |
| MB-5070      | PAFAH1B2 | cna | hetloss | METABRIC |
| MB-5107      | PAFAH1B2 | cna | hetloss | METABRIC |
| MB-6271      | PAFAH1B2 | cna | hetloss | METABRIC |
| MB-7032      | PAFAH1B2 | cna | hetloss | METABRIC |
| MB-7048      | PAFAH1B2 | cna | hetloss | METABRIC |
| PD11327      | PAFAH1B2 | cna | hetloss | BASIS    |
| PD11742      | PAFAH1B2 | cna | hetloss | BASIS    |
| PD13296      | PAFAH1B2 | cna | hetloss | BASIS    |
| PD13297      | PAFAH1B2 | cna | hetloss | BASIS    |
| PD13771      | PAFAH1B2 | cna | hetloss | BASIS    |
| PD22355      | PAFAH1B2 | cna | hetloss | BASIS    |
| PD23574      | PAFAH1B2 | cna | gain    | BASIS    |
| PD23578      | PAFAH1B2 | cna | hetloss | BASIS    |
| PD24186      | PAFAH1B2 | cna | gain    | BASIS    |
| PD24206      | PAFAH1B2 | cna | gain    | BASIS    |

|              |          |     |         |          |
|--------------|----------|-----|---------|----------|
| PD24337      | PAFAH1B2 | cna | hetloss | BASIS    |
| PD3905       | PAFAH1B2 | cna | gain    | BASIS    |
| PD4005       | PAFAH1B2 | cna | hetloss | BASIS    |
| PD4826       | PAFAH1B2 | cna | hetloss | BASIS    |
| PD5935       | PAFAH1B2 | cna | gain    | BASIS    |
| PD5945       | PAFAH1B2 | cna | gain    | BASIS    |
| PD5948       | PAFAH1B2 | cna | gain    | BASIS    |
| PD6413       | PAFAH1B2 | cna | hetloss | BASIS    |
| PD6731       | PAFAH1B2 | cna | hetloss | BASIS    |
| PD7067       | PAFAH1B2 | cna | gain    | BASIS    |
| PD7215       | PAFAH1B2 | cna | gain    | BASIS    |
| PD9004       | PAFAH1B2 | cna | hetloss | BASIS    |
| PD9702       | PAFAH1B2 | cna | gain    | BASIS    |
| TCGA-A2-A25B | PAK7     | cna | gain    | TCGA     |
| TCGA-AO-A0JL | PAK7     | cna | gain    | TCGA     |
| TCGA-BH-A0AW | PAK7     | cna | gain    | TCGA     |
| TCGA-BH-A0C0 | PAK7     | cna | hetloss | TCGA     |
| TCGA-BH-A18R | PAK7     | cna | homdel  | TCGA     |
| TCGA-C8-A12L | PAK7     | cna | gain    | TCGA     |
| TCGA-D8-A27M | PAK7     | cna | gain    | TCGA     |
| TCGA-E2-A1L7 | PAK7     | cna | gain    | TCGA     |
| TCGA-LL-A5YP | PAK7     | cna | hetloss | TCGA     |
| MB-0346      | PAK7     | cna | gain    | METABRIC |
| MB-5070      | PAK7     | cna | amp     | METABRIC |
| MB-6060      | PAK7     | cna | amp     | METABRIC |
| MB-6098      | PAK7     | cna | hetloss | METABRIC |
| MB-7032      | PAK7     | cna | gain    | METABRIC |
| MB-7048      | PAK7     | cna | gain    | METABRIC |
| PD11327      | PAK7     | cna | gain    | BASIS    |
| PD13296      | PAK7     | cna | hetloss | BASIS    |
| PD13299      | PAK7     | cna | gain    | BASIS    |
| PD23574      | PAK7     | cna | gain    | BASIS    |
| PD23578      | PAK7     | cna | hetloss | BASIS    |
| PD24186      | PAK7     | cna | amp     | BASIS    |
| PD24202      | PAK7     | cna | hetloss | BASIS    |
| PD24337      | PAK7     | cna | amp     | BASIS    |
| PD3905       | PAK7     | cna | gain    | BASIS    |
| PD4005       | PAK7     | cna | hetloss | BASIS    |
| PD4006       | PAK7     | cna | hetloss | BASIS    |
| PD4107       | PAK7     | cna | gain    | BASIS    |
| PD4826       | PAK7     | cna | hetloss | BASIS    |
| PD5930       | PAK7     | cna | gain    | BASIS    |
| PD5935       | PAK7     | cna | gain    | BASIS    |
| PD5945       | PAK7     | cna | amp     | BASIS    |
| PD5948       | PAK7     | cna | gain    | BASIS    |
| PD7067       | PAK7     | cna | hetloss | BASIS    |
| PD7215       | PAK7     | cna | gain    | BASIS    |

|              |        |     |         |          |
|--------------|--------|-----|---------|----------|
| PD8621       | PAK7   | cna | gain    | BASIS    |
| PD8980       | PAK7   | cna | hetloss | BASIS    |
| PD9004       | PAK7   | cna | gain    | BASIS    |
| PD9585       | PAK7   | cna | gain    | BASIS    |
| PD9702       | PAK7   | cna | gain    | BASIS    |
| TCGA-A2-A25B | PCSK7  | cna | hetloss | TCGA     |
| TCGA-AN-A0XU | PCSK7  | cna | gain    | TCGA     |
| TCGA-AO-A0JL | PCSK7  | cna | hetloss | TCGA     |
| TCGA-BH-A0C0 | PCSK7  | cna | hetloss | TCGA     |
| TCGA-BH-A18R | PCSK7  | cna | homdel  | TCGA     |
| TCGA-D8-A27M | PCSK7  | cna | hetloss | TCGA     |
| TCGA-E2-A1L7 | PCSK7  | cna | hetloss | TCGA     |
| TCGA-E9-A1NC | PCSK7  | cna | hetloss | TCGA     |
| TCGA-EW-A10X | PCSK7  | cna | homdel  | TCGA     |
| TCGA-LL-A5YP | PCSK7  | cna | hetloss | TCGA     |
| MB-0346      | PCSK7  | cna | hetloss | METABRIC |
| MB-5070      | PCSK7  | cna | hetloss | METABRIC |
| MB-5107      | PCSK7  | cna | hetloss | METABRIC |
| MB-6271      | PCSK7  | cna | hetloss | METABRIC |
| MB-7032      | PCSK7  | cna | hetloss | METABRIC |
| MB-7048      | PCSK7  | cna | hetloss | METABRIC |
| PD11327      | PCSK7  | cna | hetloss | BASIS    |
| PD11742      | PCSK7  | cna | hetloss | BASIS    |
| PD13296      | PCSK7  | cna | hetloss | BASIS    |
| PD13297      | PCSK7  | cna | hetloss | BASIS    |
| PD13771      | PCSK7  | cna | hetloss | BASIS    |
| PD22355      | PCSK7  | cna | hetloss | BASIS    |
| PD23574      | PCSK7  | cna | gain    | BASIS    |
| PD23578      | PCSK7  | cna | hetloss | BASIS    |
| PD24186      | PCSK7  | cna | gain    | BASIS    |
| PD24206      | PCSK7  | cna | gain    | BASIS    |
| PD24337      | PCSK7  | cna | hetloss | BASIS    |
| PD3905       | PCSK7  | cna | gain    | BASIS    |
| PD4005       | PCSK7  | cna | hetloss | BASIS    |
| PD4826       | PCSK7  | cna | hetloss | BASIS    |
| PD5935       | PCSK7  | cna | gain    | BASIS    |
| PD5945       | PCSK7  | cna | gain    | BASIS    |
| PD5948       | PCSK7  | cna | gain    | BASIS    |
| PD6413       | PCSK7  | cna | hetloss | BASIS    |
| PD6731       | PCSK7  | cna | hetloss | BASIS    |
| PD7067       | PCSK7  | cna | gain    | BASIS    |
| PD7215       | PCSK7  | cna | gain    | BASIS    |
| PD9004       | PCSK7  | cna | hetloss | BASIS    |
| PD9702       | PCSK7  | cna | gain    | BASIS    |
| TCGA-A2-A25B | PDCD11 | cna | hetloss | TCGA     |
| TCGA-AN-A0XU | PDCD11 | cna | hetloss | TCGA     |
| TCGA-AO-A0JL | PDCD11 | cna | hetloss | TCGA     |

|              |        |     |         |          |
|--------------|--------|-----|---------|----------|
| TCGA-BH-A18R | PDCD11 | cna | gain    | TCGA     |
| TCGA-C8-A12L | PDCD11 | cna | hetloss | TCGA     |
| TCGA-D8-A27M | PDCD11 | cna | hetloss | TCGA     |
| TCGA-E2-A1L7 | PDCD11 | cna | hetloss | TCGA     |
| TCGA-LL-A5YP | PDCD11 | cna | hetloss | TCGA     |
| MB-0346      | PDCD11 | cna | gain    | METABRIC |
| MB-2827      | PDCD11 | cna | hetloss | METABRIC |
| MB-5070      | PDCD11 | cna | hetloss | METABRIC |
| MB-6098      | PDCD11 | cna | hetloss | METABRIC |
| MB-7038      | PDCD11 | cna | hetloss | METABRIC |
| MB-7048      | PDCD11 | cna | hetloss | METABRIC |
| MB-0420      | PDCD11 | cna | hetloss | METABRIC |
| PD10014      | PDCD11 | cna | hetloss | BASIS    |
| PD11327      | PDCD11 | cna | homdel  | BASIS    |
| PD11742      | PDCD11 | cna | hetloss | BASIS    |
| PD22355      | PDCD11 | cna | hetloss | BASIS    |
| PD23562      | PDCD11 | cna | gain    | BASIS    |
| PD23574      | PDCD11 | cna | gain    | BASIS    |
| PD23578      | PDCD11 | cna | hetloss | BASIS    |
| PD24206      | PDCD11 | cna | homdel  | BASIS    |
| PD3890       | PDCD11 | cna | hetloss | BASIS    |
| PD3905       | PDCD11 | cna | gain    | BASIS    |
| PD4005       | PDCD11 | cna | hetloss | BASIS    |
| PD4006       | PDCD11 | cna | gain    | BASIS    |
| PD4107       | PDCD11 | cna | gain    | BASIS    |
| PD5935       | PDCD11 | cna | hetloss | BASIS    |
| PD5945       | PDCD11 | cna | gain    | BASIS    |
| PD5948       | PDCD11 | cna | gain    | BASIS    |
| PD6406       | PDCD11 | cna | hetloss | BASIS    |
| PD6731       | PDCD11 | cna | hetloss | BASIS    |
| PD7067       | PDCD11 | cna | gain    | BASIS    |
| PD7215       | PDCD11 | cna | gain    | BASIS    |
| PD8621       | PDCD11 | cna | gain    | BASIS    |
| PD8980       | PDCD11 | cna | hetloss | BASIS    |
| PD9585       | PDCD11 | cna | hetloss | BASIS    |
| PD9702       | PDCD11 | cna | gain    | BASIS    |
| TCGA-AN-A0XU | PLK2   | cna | hetloss | TCGA     |
| TCGA-AO-A0JL | PLK2   | cna | hetloss | TCGA     |
| TCGA-BH-A0C0 | PLK2   | cna | hetloss | TCGA     |
| TCGA-BH-A1FU | PLK2   | cna | hetloss | TCGA     |
| TCGA-C8-A12L | PLK2   | cna | hetloss | TCGA     |
| TCGA-E2-A1L7 | PLK2   | cna | hetloss | TCGA     |
| TCGA-E9-A1NC | PLK2   | cna | hetloss | TCGA     |
| TCGA-LL-A5YP | PLK2   | cna | hetloss | TCGA     |
| MB-0346      | PLK2   | cna | gain    | METABRIC |
| MB-2827      | PLK2   | cna | hetloss | METABRIC |
| MB-5107      | PLK2   | cna | hetloss | METABRIC |

|              |        |     |         |          |
|--------------|--------|-----|---------|----------|
| MB-5465      | PLK2   | cna | hetloss | METABRIC |
| MB-6098      | PLK2   | cna | gain    | METABRIC |
| MB-7038      | PLK2   | cna | hetloss | METABRIC |
| MB-0420      | PLK2   | cna | hetloss | METABRIC |
| PD10014      | PLK2   | cna | hetloss | BASIS    |
| PD11742      | PLK2   | cna | hetloss | BASIS    |
| PD13296      | PLK2   | cna | hetloss | BASIS    |
| PD13297      | PLK2   | cna | hetloss | BASIS    |
| PD13771      | PLK2   | cna | hetloss | BASIS    |
| PD23562      | PLK2   | cna | hetloss | BASIS    |
| PD23578      | PLK2   | cna | hetloss | BASIS    |
| PD24186      | PLK2   | cna | gain    | BASIS    |
| PD24202      | PLK2   | cna | hetloss | BASIS    |
| PD24206      | PLK2   | cna | gain    | BASIS    |
| PD24337      | PLK2   | cna | hetloss | BASIS    |
| PD3890       | PLK2   | cna | hetloss | BASIS    |
| PD3905       | PLK2   | cna | gain    | BASIS    |
| PD4005       | PLK2   | cna | hetloss | BASIS    |
| PD4006       | PLK2   | cna | hetloss | BASIS    |
| PD4107       | PLK2   | cna | hetloss | BASIS    |
| PD5930       | PLK2   | cna | hetloss | BASIS    |
| PD5935       | PLK2   | cna | hetloss | BASIS    |
| PD5948       | PLK2   | cna | homdel  | BASIS    |
| PD6413       | PLK2   | cna | hetloss | BASIS    |
| PD7215       | PLK2   | cna | hetloss | BASIS    |
| PD8621       | PLK2   | cna | hetloss | BASIS    |
| PD8980       | PLK2   | cna | hetloss | BASIS    |
| PD9004       | PLK2   | cna | gain    | BASIS    |
| TCGA-A2-A25B | PRDM16 | cna | hetloss | TCGA     |
| TCGA-AN-A0XU | PRDM16 | cna | hetloss | TCGA     |
| TCGA-AO-A0JL | PRDM16 | cna | hetloss | TCGA     |
| TCGA-BH-A0AW | PRDM16 | cna | gain    | TCGA     |
| TCGA-BH-A0C0 | PRDM16 | cna | gain    | TCGA     |
| TCGA-BH-A18R | PRDM16 | cna | homdel  | TCGA     |
| TCGA-BH-A1FU | PRDM16 | cna | gain    | TCGA     |
| TCGA-C8-A12L | PRDM16 | cna | hetloss | TCGA     |
| TCGA-D8-A27M | PRDM16 | cna | gain    | TCGA     |
| TCGA-E2-A1L7 | PRDM16 | cna | hetloss | TCGA     |
| TCGA-E9-A1NC | PRDM16 | cna | hetloss | TCGA     |
| TCGA-LL-A5YP | PRDM16 | cna | amp     | TCGA     |
| MB-2827      | PRDM16 | cna | hetloss | METABRIC |
| MB-5070      | PRDM16 | cna | hetloss | METABRIC |
| MB-5465      | PRDM16 | cna | hetloss | METABRIC |
| MB-6098      | PRDM16 | cna | hetloss | METABRIC |
| MB-0420      | PRDM16 | cna | hetloss | METABRIC |
| PD10014      | PRDM16 | cna | gain    | BASIS    |
| PD11327      | PRDM16 | cna | gain    | BASIS    |

|              |        |     |         |          |
|--------------|--------|-----|---------|----------|
| PD11742      | PRDM16 | cna | hetloss | BASIS    |
| PD13297      | PRDM16 | cna | gain    | BASIS    |
| PD22355      | PRDM16 | cna | hetloss | BASIS    |
| PD23578      | PRDM16 | cna | hetloss | BASIS    |
| PD24186      | PRDM16 | cna | gain    | BASIS    |
| PD24202      | PRDM16 | cna | hetloss | BASIS    |
| PD24206      | PRDM16 | cna | amp     | BASIS    |
| PD24337      | PRDM16 | cna | hetloss | BASIS    |
| PD3890       | PRDM16 | cna | hetloss | BASIS    |
| PD3905       | PRDM16 | cna | gain    | BASIS    |
| PD4005       | PRDM16 | cna | gain    | BASIS    |
| PD4107       | PRDM16 | cna | gain    | BASIS    |
| PD4826       | PRDM16 | cna | gain    | BASIS    |
| PD5945       | PRDM16 | cna | gain    | BASIS    |
| PD6406       | PRDM16 | cna | hetloss | BASIS    |
| PD7067       | PRDM16 | cna | gain    | BASIS    |
| PD7215       | PRDM16 | cna | gain    | BASIS    |
| PD8621       | PRDM16 | cna | gain    | BASIS    |
| PD8980       | PRDM16 | cna | hetloss | BASIS    |
| PD9004       | PRDM16 | cna | hetloss | BASIS    |
| TCGA-A2-A25B | ROS1   | cna | hetloss | TCGA     |
| TCGA-AN-A0XU | ROS1   | cna | amp     | TCGA     |
| TCGA-AO-A0JL | ROS1   | cna | hetloss | TCGA     |
| TCGA-BH-A0AW | ROS1   | cna | amp     | TCGA     |
| TCGA-BH-A18R | ROS1   | cna | homdel  | TCGA     |
| TCGA-C8-A12L | ROS1   | cna | gain    | TCGA     |
| TCGA-D8-A27M | ROS1   | cna | hetloss | TCGA     |
| MB-2827      | ROS1   | cna | amp     | METABRIC |
| MB-5070      | ROS1   | cna | gain    | METABRIC |
| MB-6098      | ROS1   | cna | hetloss | METABRIC |
| MB-7032      | ROS1   | cna | hetloss | METABRIC |
| MB-7038      | ROS1   | cna | gain    | METABRIC |
| MB-7048      | ROS1   | cna | hetloss | METABRIC |
| MTS-T0064    | ROS1   | cna | amp     | METABRIC |
| PD11327      | ROS1   | cna | gain    | BASIS    |
| PD13299      | ROS1   | cna | gain    | BASIS    |
| PD13771      | ROS1   | cna | hetloss | BASIS    |
| PD22355      | ROS1   | cna | gain    | BASIS    |
| PD23562      | ROS1   | cna | gain    | BASIS    |
| PD23574      | ROS1   | cna | gain    | BASIS    |
| PD24186      | ROS1   | cna | gain    | BASIS    |
| PD24206      | ROS1   | cna | gain    | BASIS    |
| PD24337      | ROS1   | cna | hetloss | BASIS    |
| PD3905       | ROS1   | cna | gain    | BASIS    |
| PD4006       | ROS1   | cna | gain    | BASIS    |
| PD4107       | ROS1   | cna | hetloss | BASIS    |
| PD4826       | ROS1   | cna | gain    | BASIS    |



|              |       |     |         |          |
|--------------|-------|-----|---------|----------|
| PD5930       | ROS1  | cna | hetloss | BASIS    |
| PD5935       | ROS1  | cna | gain    | BASIS    |
| PD5945       | ROS1  | cna | amp     | BASIS    |
| PD6406       | ROS1  | cna | hetloss | BASIS    |
| PD6731       | ROS1  | cna | hetloss | BASIS    |
| PD7067       | ROS1  | cna | gain    | BASIS    |
| PD7215       | ROS1  | cna | gain    | BASIS    |
| PD8621       | ROS1  | cna | gain    | BASIS    |
| PD8980       | ROS1  | cna | gain    | BASIS    |
| PD9004       | ROS1  | cna | gain    | BASIS    |
| PD9585       | ROS1  | cna | hetloss | BASIS    |
| PD9702       | ROS1  | cna | gain    | BASIS    |
| TCGA-AN-A0XU | RPL13 | cna | gain    | TCGA     |
| TCGA-AO-A0JL | RPL13 | cna | gain    | TCGA     |
| TCGA-BH-A0AW | RPL13 | cna | hetloss | TCGA     |
| TCGA-BH-A0C0 | RPL13 | cna | gain    | TCGA     |
| TCGA-C8-A12L | RPL13 | cna | hetloss | TCGA     |
| TCGA-E2-A1L7 | RPL13 | cna | hetloss | TCGA     |
| TCGA-E9-A1NC | RPL13 | cna | hetloss | TCGA     |
| TCGA-LL-A5YP | RPL13 | cna | gain    | TCGA     |
| MB-0346      | RPL13 | cna | gain    | METABRIC |
| MB-5107      | RPL13 | cna | hetloss | METABRIC |
| MB-6271      | RPL13 | cna | hetloss | METABRIC |
| MB-7032      | RPL13 | cna | hetloss | METABRIC |
| MB-7038      | RPL13 | cna | gain    | METABRIC |
| MB-7048      | RPL13 | cna | hetloss | METABRIC |
| MB-0420      | RPL13 | cna | hetloss | METABRIC |
| PD10014      | RPL13 | cna | hetloss | BASIS    |
| PD11327      | RPL13 | cna | gain    | BASIS    |
| PD11742      | RPL13 | cna | hetloss | BASIS    |
| PD13296      | RPL13 | cna | hetloss | BASIS    |
| PD13297      | RPL13 | cna | hetloss | BASIS    |
| PD13299      | RPL13 | cna | gain    | BASIS    |
| PD14442      | RPL13 | cna | hetloss | BASIS    |
| PD23562      | RPL13 | cna | gain    | BASIS    |
| PD23574      | RPL13 | cna | gain    | BASIS    |
| PD24202      | RPL13 | cna | hetloss | BASIS    |
| PD3890       | RPL13 | cna | gain    | BASIS    |
| PD3905       | RPL13 | cna | gain    | BASIS    |
| PD4005       | RPL13 | cna | hetloss | BASIS    |
| PD4006       | RPL13 | cna | gain    | BASIS    |
| PD4107       | RPL13 | cna | amp     | BASIS    |
| PD4967       | RPL13 | cna | hetloss | BASIS    |
| PD5930       | RPL13 | cna | hetloss | BASIS    |
| PD5945       | RPL13 | cna | amp     | BASIS    |
| PD5948       | RPL13 | cna | gain    | BASIS    |
| PD7215       | RPL13 | cna | gain    | BASIS    |

|              |         |     |         |          |
|--------------|---------|-----|---------|----------|
| PD8621       | RPL13   | cna | gain    | BASIS    |
| PD9004       | RPL13   | cna | gain    | BASIS    |
| PD9585       | RPL13   | cna | hetloss | BASIS    |
| PD9702       | RPL13   | cna | gain    | BASIS    |
| TCGA-A2-A25B | SH2B3   | cna | gain    | TCGA     |
| TCGA-AO-A0JL | SH2B3   | cna | hetloss | TCGA     |
| TCGA-BH-A0C0 | SH2B3   | cna | gain    | TCGA     |
| TCGA-BH-A18R | SH2B3   | cna | gain    | TCGA     |
| TCGA-BH-A1FU | SH2B3   | cna | hetloss | TCGA     |
| TCGA-C8-A12L | SH2B3   | cna | gain    | TCGA     |
| TCGA-D8-A27M | SH2B3   | cna | hetloss | TCGA     |
| TCGA-E2-A1L7 | SH2B3   | cna | gain    | TCGA     |
| TCGA-LL-A5YP | SH2B3   | cna | hetloss | TCGA     |
| MB-0346      | SH2B3   | cna | gain    | METABRIC |
| MB-2827      | SH2B3   | cna | hetloss | METABRIC |
| MB-5070      | SH2B3   | cna | hetloss | METABRIC |
| MB-5465      | SH2B3   | cna | hetloss | METABRIC |
| MB-6098      | SH2B3   | cna | hetloss | METABRIC |
| MB-7048      | SH2B3   | cna | hetloss | METABRIC |
| PD10014      | SH2B3   | cna | gain    | BASIS    |
| PD11327      | SH2B3   | cna | hetloss | BASIS    |
| PD11742      | SH2B3   | cna | hetloss | BASIS    |
| PD13296      | SH2B3   | cna | hetloss | BASIS    |
| PD13297      | SH2B3   | cna | gain    | BASIS    |
| PD22355      | SH2B3   | cna | hetloss | BASIS    |
| PD23574      | SH2B3   | cna | gain    | BASIS    |
| PD24337      | SH2B3   | cna | gain    | BASIS    |
| PD3890       | SH2B3   | cna | hetloss | BASIS    |
| PD3905       | SH2B3   | cna | gain    | BASIS    |
| PD4005       | SH2B3   | cna | hetloss | BASIS    |
| PD4006       | SH2B3   | cna | gain    | BASIS    |
| PD4107       | SH2B3   | cna | gain    | BASIS    |
| PD4826       | SH2B3   | cna | gain    | BASIS    |
| PD4967       | SH2B3   | cna | hetloss | BASIS    |
| PD5945       | SH2B3   | cna | gain    | BASIS    |
| PD5948       | SH2B3   | cna | gain    | BASIS    |
| PD6406       | SH2B3   | cna | hetloss | BASIS    |
| PD6413       | SH2B3   | cna | hetloss | BASIS    |
| PD6731       | SH2B3   | cna | hetloss | BASIS    |
| PD7067       | SH2B3   | cna | gain    | BASIS    |
| PD9004       | SH2B3   | cna | hetloss | BASIS    |
| PD9585       | SH2B3   | cna | hetloss | BASIS    |
| PD9702       | SH2B3   | cna | gain    | BASIS    |
| TCGA-A2-A25B | SMARCA1 | cna | hetloss | TCGA     |
| TCGA-AN-A0XU | SMARCA1 | cna | hetloss | TCGA     |
| TCGA-BH-A0AW | SMARCA1 | cna | gain    | TCGA     |
| TCGA-C8-A12L | SMARCA1 | cna | gain    | TCGA     |

|              |         |     |         |          |
|--------------|---------|-----|---------|----------|
| TCGA-E2-A1L7 | SMARCA1 | cna | hetloss | TCGA     |
| TCGA-E9-A1NC | SMARCA1 | cna | hetloss | TCGA     |
| TCGA-LL-A5YP | SMARCA1 | cna | gain    | TCGA     |
| MB-0346      | SMARCA1 | cna | hetloss | METABRIC |
| MB-2827      | SMARCA1 | cna | hetloss | METABRIC |
| MB-5465      | SMARCA1 | cna | hetloss | METABRIC |
| MB-6060      | SMARCA1 | cna | gain    | METABRIC |
| MB-6098      | SMARCA1 | cna | hetloss | METABRIC |
| MB-7038      | SMARCA1 | cna | gain    | METABRIC |
| MB-0420      | SMARCA1 | cna | hetloss | METABRIC |
| PD10014      | SMARCA1 | cna | hetloss | BASIS    |
| PD13296      | SMARCA1 | cna | gain    | BASIS    |
| PD13299      | SMARCA1 | cna | amp     | BASIS    |
| PD13771      | SMARCA1 | cna | gain    | BASIS    |
| PD14442      | SMARCA1 | cna | gain    | BASIS    |
| PD23562      | SMARCA1 | cna | hetloss | BASIS    |
| PD23574      | SMARCA1 | cna | gain    | BASIS    |
| PD23578      | SMARCA1 | cna | hetloss | BASIS    |
| PD24202      | SMARCA1 | cna | hetloss | BASIS    |
| PD24206      | SMARCA1 | cna | gain    | BASIS    |
| PD3890       | SMARCA1 | cna | hetloss | BASIS    |
| PD3905       | SMARCA1 | cna | gain    | BASIS    |
| PD4107       | SMARCA1 | cna | amp     | BASIS    |
| PD4826       | SMARCA1 | cna | gain    | BASIS    |
| PD4967       | SMARCA1 | cna | gain    | BASIS    |
| PD5930       | SMARCA1 | cna | gain    | BASIS    |
| PD5935       | SMARCA1 | cna | gain    | BASIS    |
| PD5945       | SMARCA1 | cna | gain    | BASIS    |
| PD5948       | SMARCA1 | cna | gain    | BASIS    |
| PD6406       | SMARCA1 | cna | gain    | BASIS    |
| PD6413       | SMARCA1 | cna | gain    | BASIS    |
| PD7215       | SMARCA1 | cna | gain    | BASIS    |
| PD8621       | SMARCA1 | cna | amp     | BASIS    |
| PD8980       | SMARCA1 | cna | hetloss | BASIS    |
| PD9004       | SMARCA1 | cna | gain    | BASIS    |
| TCGA-A2-A25B | SNAP25  | cna | gain    | TCGA     |
| TCGA-AO-A0JL | SNAP25  | cna | gain    | TCGA     |
| TCGA-BH-A0AW | SNAP25  | cna | gain    | TCGA     |
| TCGA-BH-A0C0 | SNAP25  | cna | hetloss | TCGA     |
| TCGA-BH-A18R | SNAP25  | cna | homdel  | TCGA     |
| TCGA-C8-A12L | SNAP25  | cna | gain    | TCGA     |
| TCGA-D8-A27M | SNAP25  | cna | gain    | TCGA     |
| TCGA-E2-A1L7 | SNAP25  | cna | gain    | TCGA     |
| TCGA-LL-A5YP | SNAP25  | cna | hetloss | TCGA     |
| MB-0346      | SNAP25  | cna | gain    | METABRIC |
| MB-5070      | SNAP25  | cna | amp     | METABRIC |
| MB-6060      | SNAP25  | cna | amp     | METABRIC |

|              |        |     |         |          |
|--------------|--------|-----|---------|----------|
| MB-6098      | SNAP25 | cna | hetloss | METABRIC |
| MB-7032      | SNAP25 | cna | gain    | METABRIC |
| MB-7048      | SNAP25 | cna | gain    | METABRIC |
| PD11327      | SNAP25 | cna | gain    | BASIS    |
| PD13296      | SNAP25 | cna | hetloss | BASIS    |
| PD13299      | SNAP25 | cna | gain    | BASIS    |
| PD23574      | SNAP25 | cna | gain    | BASIS    |
| PD23578      | SNAP25 | cna | hetloss | BASIS    |
| PD24186      | SNAP25 | cna | amp     | BASIS    |
| PD24202      | SNAP25 | cna | hetloss | BASIS    |
| PD24337      | SNAP25 | cna | amp     | BASIS    |
| PD3905       | SNAP25 | cna | gain    | BASIS    |
| PD4005       | SNAP25 | cna | hetloss | BASIS    |
| PD4006       | SNAP25 | cna | hetloss | BASIS    |
| PD4107       | SNAP25 | cna | gain    | BASIS    |
| PD4826       | SNAP25 | cna | hetloss | BASIS    |
| PD5930       | SNAP25 | cna | gain    | BASIS    |
| PD5935       | SNAP25 | cna | gain    | BASIS    |
| PD5945       | SNAP25 | cna | amp     | BASIS    |
| PD5948       | SNAP25 | cna | gain    | BASIS    |
| PD7067       | SNAP25 | cna | hetloss | BASIS    |
| PD7215       | SNAP25 | cna | gain    | BASIS    |
| PD8621       | SNAP25 | cna | gain    | BASIS    |
| PD8980       | SNAP25 | cna | hetloss | BASIS    |
| PD9004       | SNAP25 | cna | gain    | BASIS    |
| PD9585       | SNAP25 | cna | gain    | BASIS    |
| PD9702       | SNAP25 | cna | gain    | BASIS    |
| TCGA-A2-A25B | TAF1   | cna | gain    | TCGA     |
| TCGA-AN-A0XU | TAF1   | cna | hetloss | TCGA     |
| TCGA-AO-A0JL | TAF1   | cna | gain    | TCGA     |
| TCGA-BH-A0AW | TAF1   | cna | gain    | TCGA     |
| TCGA-C8-A12L | TAF1   | cna | hetloss | TCGA     |
| TCGA-E2-A1L7 | TAF1   | cna | hetloss | TCGA     |
| TCGA-E9-A1NC | TAF1   | cna | hetloss | TCGA     |
| MB-0346      | TAF1   | cna | hetloss | METABRIC |
| MB-2827      | TAF1   | cna | hetloss | METABRIC |
| MB-5465      | TAF1   | cna | gain    | METABRIC |
| MB-6060      | TAF1   | cna | hetloss | METABRIC |
| MB-0420      | TAF1   | cna | hetloss | METABRIC |
| PD10014      | TAF1   | cna | hetloss | BASIS    |
| PD11327      | TAF1   | cna | hetloss | BASIS    |
| PD13296      | TAF1   | cna | amp     | BASIS    |
| PD13297      | TAF1   | cna | gain    | BASIS    |
| PD13299      | TAF1   | cna | gain    | BASIS    |
| PD13771      | TAF1   | cna | gain    | BASIS    |
| PD14442      | TAF1   | cna | gain    | BASIS    |
| PD23562      | TAF1   | cna | hetloss | BASIS    |

|              |       |     |         |          |
|--------------|-------|-----|---------|----------|
| PD23574      | TAF1  | cna | gain    | BASIS    |
| PD24206      | TAF1  | cna | gain    | BASIS    |
| PD3890       | TAF1  | cna | gain    | BASIS    |
| PD3905       | TAF1  | cna | gain    | BASIS    |
| PD4005       | TAF1  | cna | hetloss | BASIS    |
| PD4006       | TAF1  | cna | gain    | BASIS    |
| PD4107       | TAF1  | cna | amp     | BASIS    |
| PD4826       | TAF1  | cna | gain    | BASIS    |
| PD4967       | TAF1  | cna | gain    | BASIS    |
| PD5930       | TAF1  | cna | gain    | BASIS    |
| PD5935       | TAF1  | cna | gain    | BASIS    |
| PD5948       | TAF1  | cna | gain    | BASIS    |
| PD6406       | TAF1  | cna | gain    | BASIS    |
| PD6413       | TAF1  | cna | gain    | BASIS    |
| PD7067       | TAF1  | cna | gain    | BASIS    |
| PD7215       | TAF1  | cna | gain    | BASIS    |
| PD8621       | TAF1  | cna | amp     | BASIS    |
| PD8980       | TAF1  | cna | gain    | BASIS    |
| PD9004       | TAF1  | cna | gain    | BASIS    |
| TCGA-A2-A25B | TRAF3 | cna | gain    | TCGA     |
| TCGA-AN-A0XU | TRAF3 | cna | hetloss | TCGA     |
| TCGA-AO-A0JL | TRAF3 | cna | hetloss | TCGA     |
| TCGA-BH-A0AW | TRAF3 | cna | hetloss | TCGA     |
| TCGA-BH-A1FU | TRAF3 | cna | gain    | TCGA     |
| TCGA-C8-A12L | TRAF3 | cna | gain    | TCGA     |
| TCGA-D8-A27M | TRAF3 | cna | hetloss | TCGA     |
| TCGA-E2-A1L7 | TRAF3 | cna | gain    | TCGA     |
| TCGA-E9-A1NC | TRAF3 | cna | hetloss | TCGA     |
| TCGA-LL-A5YP | TRAF3 | cna | hetloss | TCGA     |
| MB-0346      | TRAF3 | cna | gain    | METABRIC |
| MB-2827      | TRAF3 | cna | hetloss | METABRIC |
| MB-5070      | TRAF3 | cna | hetloss | METABRIC |
| MB-5107      | TRAF3 | cna | hetloss | METABRIC |
| MB-6060      | TRAF3 | cna | gain    | METABRIC |
| MB-6098      | TRAF3 | cna | gain    | METABRIC |
| MTS-T0064    | TRAF3 | cna | hetloss | METABRIC |
| PD10014      | TRAF3 | cna | hetloss | BASIS    |
| PD11742      | TRAF3 | cna | hetloss | BASIS    |
| PD13296      | TRAF3 | cna | gain    | BASIS    |
| PD13297      | TRAF3 | cna | hetloss | BASIS    |
| PD13771      | TRAF3 | cna | hetloss | BASIS    |
| PD22355      | TRAF3 | cna | hetloss | BASIS    |
| PD23578      | TRAF3 | cna | hetloss | BASIS    |
| PD24202      | TRAF3 | cna | hetloss | BASIS    |
| PD24337      | TRAF3 | cna | hetloss | BASIS    |
| PD3890       | TRAF3 | cna | hetloss | BASIS    |
| PD3905       | TRAF3 | cna | gain    | BASIS    |

|              |       |     |         |          |
|--------------|-------|-----|---------|----------|
| PD4006       | TRAF3 | cna | gain    | BASIS    |
| PD4826       | TRAF3 | cna | gain    | BASIS    |
| PD4967       | TRAF3 | cna | hetloss | BASIS    |
| PD5945       | TRAF3 | cna | gain    | BASIS    |
| PD5948       | TRAF3 | cna | gain    | BASIS    |
| PD6406       | TRAF3 | cna | hetloss | BASIS    |
| PD6413       | TRAF3 | cna | hetloss | BASIS    |
| PD7067       | TRAF3 | cna | gain    | BASIS    |
| PD8621       | TRAF3 | cna | gain    | BASIS    |
| PD8980       | TRAF3 | cna | hetloss | BASIS    |
| PD9702       | TRAF3 | cna | gain    | BASIS    |
| TCGA-AN-A0XU | TRAF7 | cna | hetloss | TCGA     |
| TCGA-AO-A0JL | TRAF7 | cna | gain    | TCGA     |
| TCGA-BH-A0AW | TRAF7 | cna | gain    | TCGA     |
| TCGA-BH-A0C0 | TRAF7 | cna | gain    | TCGA     |
| TCGA-C8-A12L | TRAF7 | cna | gain    | TCGA     |
| TCGA-E2-A1L7 | TRAF7 | cna | gain    | TCGA     |
| TCGA-E9-A1NC | TRAF7 | cna | hetloss | TCGA     |
| TCGA-LL-A5YP | TRAF7 | cna | gain    | TCGA     |
| MB-0346      | TRAF7 | cna | hetloss | METABRIC |
| MB-5465      | TRAF7 | cna | hetloss | METABRIC |
| MB-6271      | TRAF7 | cna | gain    | METABRIC |
| MB-7032      | TRAF7 | cna | gain    | METABRIC |
| PD10014      | TRAF7 | cna | gain    | BASIS    |
| PD11327      | TRAF7 | cna | gain    | BASIS    |
| PD11742      | TRAF7 | cna | gain    | BASIS    |
| PD13296      | TRAF7 | cna | gain    | BASIS    |
| PD13297      | TRAF7 | cna | hetloss | BASIS    |
| PD13299      | TRAF7 | cna | gain    | BASIS    |
| PD22355      | TRAF7 | cna | hetloss | BASIS    |
| PD23578      | TRAF7 | cna | hetloss | BASIS    |
| PD24202      | TRAF7 | cna | hetloss | BASIS    |
| PD24337      | TRAF7 | cna | hetloss | BASIS    |
| PD3905       | TRAF7 | cna | gain    | BASIS    |
| PD4005       | TRAF7 | cna | gain    | BASIS    |
| PD4006       | TRAF7 | cna | gain    | BASIS    |
| PD4107       | TRAF7 | cna | gain    | BASIS    |
| PD4826       | TRAF7 | cna | gain    | BASIS    |
| PD4967       | TRAF7 | cna | gain    | BASIS    |
| PD5930       | TRAF7 | cna | gain    | BASIS    |
| PD5935       | TRAF7 | cna | gain    | BASIS    |
| PD5945       | TRAF7 | cna | gain    | BASIS    |
| PD5948       | TRAF7 | cna | gain    | BASIS    |
| PD6413       | TRAF7 | cna | gain    | BASIS    |
| PD7067       | TRAF7 | cna | gain    | BASIS    |
| PD7215       | TRAF7 | cna | amp     | BASIS    |
| PD8621       | TRAF7 | cna | gain    | BASIS    |

|              |       |     |         |          |
|--------------|-------|-----|---------|----------|
| PD9004       | TRAF7 | cna | gain    | BASIS    |
| PD9585       | TRAF7 | cna | hetloss | BASIS    |
| PD9702       | TRAF7 | cna | gain    | BASIS    |
| TCGA-A2-A25B | WWTR1 | cna | gain    | TCGA     |
| TCGA-AN-A0XU | WWTR1 | cna | gain    | TCGA     |
| TCGA-BH-A0C0 | WWTR1 | cna | gain    | TCGA     |
| TCGA-BH-A18R | WWTR1 | cna | gain    | TCGA     |
| TCGA-BH-A1FU | WWTR1 | cna | hetloss | TCGA     |
| TCGA-C8-A12L | WWTR1 | cna | gain    | TCGA     |
| TCGA-E2-A1L7 | WWTR1 | cna | gain    | TCGA     |
| TCGA-E9-A1NC | WWTR1 | cna | gain    | TCGA     |
| TCGA-LL-A5YP | WWTR1 | cna | gain    | TCGA     |
| MB-0346      | WWTR1 | cna | gain    | METABRIC |
| MB-5070      | WWTR1 | cna | amp     | METABRIC |
| MB-5107      | WWTR1 | cna | gain    | METABRIC |
| MB-5465      | WWTR1 | cna | amp     | METABRIC |
| MB-0420      | WWTR1 | cna | gain    | METABRIC |
| PD10014      | WWTR1 | cna | gain    | BASIS    |
| PD11327      | WWTR1 | cna | gain    | BASIS    |
| PD13296      | WWTR1 | cna | gain    | BASIS    |
| PD13299      | WWTR1 | cna | gain    | BASIS    |
| PD13771      | WWTR1 | cna | hetloss | BASIS    |
| PD22355      | WWTR1 | cna | gain    | BASIS    |
| PD23561      | WWTR1 | cna | hetloss | BASIS    |
| PD23562      | WWTR1 | cna | gain    | BASIS    |
| PD23574      | WWTR1 | cna | gain    | BASIS    |
| PD23578      | WWTR1 | cna | gain    | BASIS    |
| PD24186      | WWTR1 | cna | gain    | BASIS    |
| PD24206      | WWTR1 | cna | gain    | BASIS    |
| PD3905       | WWTR1 | cna | gain    | BASIS    |
| PD4107       | WWTR1 | cna | gain    | BASIS    |
| PD5930       | WWTR1 | cna | gain    | BASIS    |
| PD5935       | WWTR1 | cna | amp     | BASIS    |
| PD5945       | WWTR1 | cna | amp     | BASIS    |
| PD5948       | WWTR1 | cna | amp     | BASIS    |
| PD6731       | WWTR1 | cna | gain    | BASIS    |
| PD7067       | WWTR1 | cna | gain    | BASIS    |
| PD7215       | WWTR1 | cna | gain    | BASIS    |
| PD8621       | WWTR1 | cna | gain    | BASIS    |
| PD8980       | WWTR1 | cna | gain    | BASIS    |
| PD9004       | WWTR1 | cna | gain    | BASIS    |
| PD9702       | WWTR1 | cna | gain    | BASIS    |
| TCGA-A2-A25B | YAP1  | cna | hetloss | TCGA     |
| TCGA-AN-A0XU | YAP1  | cna | gain    | TCGA     |
| TCGA-AO-A0JL | YAP1  | cna | hetloss | TCGA     |
| TCGA-BH-A18R | YAP1  | cna | gain    | TCGA     |
| TCGA-D8-A27M | YAP1  | cna | hetloss | TCGA     |

|              |        |     |         |          |
|--------------|--------|-----|---------|----------|
| TCGA-EW-A10X | YAP1   | cna | homdel  | TCGA     |
| TCGA-LL-A5YP | YAP1   | cna | hetloss | TCGA     |
| MB-0346      | YAP1   | cna | hetloss | METABRIC |
| MB-5070      | YAP1   | cna | hetloss | METABRIC |
| MB-5107      | YAP1   | cna | hetloss | METABRIC |
| MB-6271      | YAP1   | cna | hetloss | METABRIC |
| MB-7032      | YAP1   | cna | hetloss | METABRIC |
| MB-7048      | YAP1   | cna | hetloss | METABRIC |
| MTS-T0064    | YAP1   | cna | amp     | METABRIC |
| PD10014      | YAP1   | cna | gain    | BASIS    |
| PD11327      | YAP1   | cna | gain    | BASIS    |
| PD11742      | YAP1   | cna | hetloss | BASIS    |
| PD13296      | YAP1   | cna | hetloss | BASIS    |
| PD13299      | YAP1   | cna | gain    | BASIS    |
| PD13771      | YAP1   | cna | hetloss | BASIS    |
| PD22355      | YAP1   | cna | hetloss | BASIS    |
| PD23574      | YAP1   | cna | gain    | BASIS    |
| PD23578      | YAP1   | cna | hetloss | BASIS    |
| PD24186      | YAP1   | cna | gain    | BASIS    |
| PD24206      | YAP1   | cna | gain    | BASIS    |
| PD24337      | YAP1   | cna | hetloss | BASIS    |
| PD3905       | YAP1   | cna | gain    | BASIS    |
| PD4005       | YAP1   | cna | hetloss | BASIS    |
| PD4006       | YAP1   | cna | hetloss | BASIS    |
| PD4826       | YAP1   | cna | hetloss | BASIS    |
| PD5935       | YAP1   | cna | gain    | BASIS    |
| PD5945       | YAP1   | cna | gain    | BASIS    |
| PD5948       | YAP1   | cna | gain    | BASIS    |
| PD6413       | YAP1   | cna | hetloss | BASIS    |
| PD6731       | YAP1   | cna | hetloss | BASIS    |
| PD7067       | YAP1   | cna | amp     | BASIS    |
| PD7215       | YAP1   | cna | gain    | BASIS    |
| PD9585       | YAP1   | cna | gain    | BASIS    |
| PD9702       | YAP1   | cna | gain    | BASIS    |
| TCGA-A2-A25B | ZBTB16 | cna | hetloss | TCGA     |
| TCGA-AN-A0XU | ZBTB16 | cna | gain    | TCGA     |
| TCGA-AO-A0JL | ZBTB16 | cna | hetloss | TCGA     |
| TCGA-BH-A0C0 | ZBTB16 | cna | hetloss | TCGA     |
| TCGA-BH-A18R | ZBTB16 | cna | homdel  | TCGA     |
| TCGA-D8-A27M | ZBTB16 | cna | hetloss | TCGA     |
| TCGA-E2-A1L7 | ZBTB16 | cna | hetloss | TCGA     |
| TCGA-E9-A1NC | ZBTB16 | cna | hetloss | TCGA     |
| TCGA-EW-A10X | ZBTB16 | cna | homdel  | TCGA     |
| TCGA-LL-A5YP | ZBTB16 | cna | hetloss | TCGA     |
| MB-0346      | ZBTB16 | cna | hetloss | METABRIC |
| MB-5070      | ZBTB16 | cna | hetloss | METABRIC |
| MB-5107      | ZBTB16 | cna | hetloss | METABRIC |



|              |        |     |         |          |
|--------------|--------|-----|---------|----------|
| MB-6271      | ZBTB16 | cna | hetloss | METABRIC |
| MB-7032      | ZBTB16 | cna | hetloss | METABRIC |
| MB-7048      | ZBTB16 | cna | hetloss | METABRIC |
| PD11327      | ZBTB16 | cna | gain    | BASIS    |
| PD11742      | ZBTB16 | cna | hetloss | BASIS    |
| PD13296      | ZBTB16 | cna | hetloss | BASIS    |
| PD13771      | ZBTB16 | cna | hetloss | BASIS    |
| PD22355      | ZBTB16 | cna | hetloss | BASIS    |
| PD23574      | ZBTB16 | cna | gain    | BASIS    |
| PD23578      | ZBTB16 | cna | hetloss | BASIS    |
| PD24186      | ZBTB16 | cna | gain    | BASIS    |
| PD24206      | ZBTB16 | cna | gain    | BASIS    |
| PD24337      | ZBTB16 | cna | hetloss | BASIS    |
| PD3905       | ZBTB16 | cna | gain    | BASIS    |
| PD4005       | ZBTB16 | cna | hetloss | BASIS    |
| PD4826       | ZBTB16 | cna | hetloss | BASIS    |
| PD5935       | ZBTB16 | cna | gain    | BASIS    |
| PD5945       | ZBTB16 | cna | gain    | BASIS    |
| PD5948       | ZBTB16 | cna | gain    | BASIS    |
| PD6413       | ZBTB16 | cna | hetloss | BASIS    |
| PD6731       | ZBTB16 | cna | hetloss | BASIS    |
| PD7067       | ZBTB16 | cna | gain    | BASIS    |
| PD7215       | ZBTB16 | cna | amp     | BASIS    |
| PD9004       | ZBTB16 | cna | hetloss | BASIS    |
| PD9585       | ZBTB16 | cna | gain    | BASIS    |
| PD9702       | ZBTB16 | cna | gain    | BASIS    |
| TCGA-A2-A25B | AFF1   | cna | hetloss | TCGA     |
| TCGA-AN-A0XU | AFF1   | cna | hetloss | TCGA     |
| TCGA-AO-A0JL | AFF1   | cna | gain    | TCGA     |
| TCGA-BH-A0AW | AFF1   | cna | hetloss | TCGA     |
| TCGA-BH-A0C0 | AFF1   | cna | hetloss | TCGA     |
| TCGA-BH-A1FU | AFF1   | cna | gain    | TCGA     |
| TCGA-D8-A27M | AFF1   | cna | gain    | TCGA     |
| TCGA-E2-A1L7 | AFF1   | cna | hetloss | TCGA     |
| TCGA-E9-A1NC | AFF1   | cna | hetloss | TCGA     |
| TCGA-LL-A5YP | AFF1   | cna | gain    | TCGA     |
| MB-5070      | AFF1   | cna | hetloss | METABRIC |
| MB-5465      | AFF1   | cna | hetloss | METABRIC |
| MB-7038      | AFF1   | cna | gain    | METABRIC |
| MB-7048      | AFF1   | cna | hetloss | METABRIC |
| MB-0420      | AFF1   | cna | hetloss | METABRIC |
| PD13296      | AFF1   | cna | hetloss | BASIS    |
| PD13297      | AFF1   | cna | hetloss | BASIS    |
| PD13771      | AFF1   | cna | gain    | BASIS    |
| PD22355      | AFF1   | cna | hetloss | BASIS    |
| PD23562      | AFF1   | cna | gain    | BASIS    |
| PD23578      | AFF1   | cna | hetloss | BASIS    |

|              |      |     |         |          |
|--------------|------|-----|---------|----------|
| PD24202      | AFF1 | cna | hetloss | BASIS    |
| PD24206      | AFF1 | cna | gain    | BASIS    |
| PD3890       | AFF1 | cna | gain    | BASIS    |
| PD3905       | AFF1 | cna | gain    | BASIS    |
| PD4006       | AFF1 | cna | hetloss | BASIS    |
| PD4107       | AFF1 | cna | gain    | BASIS    |
| PD5930       | AFF1 | cna | hetloss | BASIS    |
| PD5935       | AFF1 | cna | gain    | BASIS    |
| PD5945       | AFF1 | cna | gain    | BASIS    |
| PD5948       | AFF1 | cna | gain    | BASIS    |
| PD6731       | AFF1 | cna | hetloss | BASIS    |
| PD7067       | AFF1 | cna | gain    | BASIS    |
| PD7215       | AFF1 | cna | gain    | BASIS    |
| PD8621       | AFF1 | cna | hetloss | BASIS    |
| PD8980       | AFF1 | cna | hetloss | BASIS    |
| PD9585       | AFF1 | cna | hetloss | BASIS    |
| PD9702       | AFF1 | cna | hetloss | BASIS    |
| TCGA-AN-A0XU | AFF2 | cna | hetloss | TCGA     |
| TCGA-BH-A0AW | AFF2 | cna | gain    | TCGA     |
| TCGA-BH-A1FU | AFF2 | cna | hetloss | TCGA     |
| TCGA-C8-A12L | AFF2 | cna | gain    | TCGA     |
| TCGA-E2-A1L7 | AFF2 | cna | hetloss | TCGA     |
| TCGA-E9-A1NC | AFF2 | cna | hetloss | TCGA     |
| TCGA-LL-A5YP | AFF2 | cna | gain    | TCGA     |
| MB-0346      | AFF2 | cna | hetloss | METABRIC |
| MB-2827      | AFF2 | cna | hetloss | METABRIC |
| MB-5465      | AFF2 | cna | hetloss | METABRIC |
| MB-6060      | AFF2 | cna | gain    | METABRIC |
| MB-6098      | AFF2 | cna | hetloss | METABRIC |
| MB-7038      | AFF2 | cna | gain    | METABRIC |
| PD10014      | AFF2 | cna | hetloss | BASIS    |
| PD13296      | AFF2 | cna | gain    | BASIS    |
| PD13297      | AFF2 | cna | gain    | BASIS    |
| PD13299      | AFF2 | cna | amp     | BASIS    |
| PD13771      | AFF2 | cna | gain    | BASIS    |
| PD14442      | AFF2 | cna | gain    | BASIS    |
| PD23562      | AFF2 | cna | hetloss | BASIS    |
| PD23574      | AFF2 | cna | gain    | BASIS    |
| PD23578      | AFF2 | cna | hetloss | BASIS    |
| PD24202      | AFF2 | cna | hetloss | BASIS    |
| PD24206      | AFF2 | cna | gain    | BASIS    |
| PD3890       | AFF2 | cna | hetloss | BASIS    |
| PD3905       | AFF2 | cna | gain    | BASIS    |
| PD4107       | AFF2 | cna | gain    | BASIS    |
| PD4826       | AFF2 | cna | gain    | BASIS    |
| PD4967       | AFF2 | cna | gain    | BASIS    |
| PD5930       | AFF2 | cna | gain    | BASIS    |

|              |       |     |         |          |
|--------------|-------|-----|---------|----------|
| PD5935       | AFF2  | cna | gain    | BASIS    |
| PD5945       | AFF2  | cna | amp     | BASIS    |
| PD6406       | AFF2  | cna | gain    | BASIS    |
| PD6413       | AFF2  | cna | gain    | BASIS    |
| PD7215       | AFF2  | cna | amp     | BASIS    |
| PD8621       | AFF2  | cna | amp     | BASIS    |
| PD8980       | AFF2  | cna | hetloss | BASIS    |
| PD9004       | AFF2  | cna | gain    | BASIS    |
| TCGA-A2-A25B | AMER1 | cna | gain    | TCGA     |
| TCGA-AN-A0XU | AMER1 | cna | hetloss | TCGA     |
| TCGA-AO-A0JL | AMER1 | cna | gain    | TCGA     |
| TCGA-BH-A0AW | AMER1 | cna | gain    | TCGA     |
| TCGA-BH-A0C0 | AMER1 | cna | gain    | TCGA     |
| TCGA-E2-A1L7 | AMER1 | cna | hetloss | TCGA     |
| TCGA-E9-A1NC | AMER1 | cna | hetloss | TCGA     |
| MB-0346      | AMER1 | cna | hetloss | METABRIC |
| MB-2827      | AMER1 | cna | hetloss | METABRIC |
| MB-5465      | AMER1 | cna | gain    | METABRIC |
| MB-6060      | AMER1 | cna | hetloss | METABRIC |
| MB-6098      | AMER1 | cna | hetloss | METABRIC |
| MB-0420      | AMER1 | cna | hetloss | METABRIC |
| PD10014      | AMER1 | cna | hetloss | BASIS    |
| PD11327      | AMER1 | cna | hetloss | BASIS    |
| PD13296      | AMER1 | cna | amp     | BASIS    |
| PD13299      | AMER1 | cna | gain    | BASIS    |
| PD13771      | AMER1 | cna | gain    | BASIS    |
| PD14442      | AMER1 | cna | gain    | BASIS    |
| PD23574      | AMER1 | cna | gain    | BASIS    |
| PD24206      | AMER1 | cna | amp     | BASIS    |
| PD3890       | AMER1 | cna | gain    | BASIS    |
| PD3905       | AMER1 | cna | gain    | BASIS    |
| PD4005       | AMER1 | cna | hetloss | BASIS    |
| PD4107       | AMER1 | cna | gain    | BASIS    |
| PD4826       | AMER1 | cna | gain    | BASIS    |
| PD4967       | AMER1 | cna | gain    | BASIS    |
| PD5930       | AMER1 | cna | gain    | BASIS    |
| PD5935       | AMER1 | cna | gain    | BASIS    |
| PD5945       | AMER1 | cna | gain    | BASIS    |
| PD5948       | AMER1 | cna | gain    | BASIS    |
| PD6406       | AMER1 | cna | gain    | BASIS    |
| PD6413       | AMER1 | cna | gain    | BASIS    |
| PD7067       | AMER1 | cna | gain    | BASIS    |
| PD7215       | AMER1 | cna | gain    | BASIS    |
| PD8621       | AMER1 | cna | gain    | BASIS    |
| PD8980       | AMER1 | cna | gain    | BASIS    |
| PD9004       | AMER1 | cna | gain    | BASIS    |
| TCGA-A2-A25B | ASCL4 | cna | gain    | TCGA     |

|              |       |     |         |          |
|--------------|-------|-----|---------|----------|
| TCGA-AO-A0JL | ASCL4 | cna | hetloss | TCGA     |
| TCGA-BH-A0C0 | ASCL4 | cna | gain    | TCGA     |
| TCGA-BH-A18R | ASCL4 | cna | gain    | TCGA     |
| TCGA-BH-A1FU | ASCL4 | cna | hetloss | TCGA     |
| TCGA-C8-A12L | ASCL4 | cna | gain    | TCGA     |
| TCGA-D8-A27M | ASCL4 | cna | hetloss | TCGA     |
| TCGA-E2-A1L7 | ASCL4 | cna | gain    | TCGA     |
| TCGA-LL-A5YP | ASCL4 | cna | hetloss | TCGA     |
| MB-0346      | ASCL4 | cna | gain    | METABRIC |
| MB-2827      | ASCL4 | cna | hetloss | METABRIC |
| MB-5070      | ASCL4 | cna | hetloss | METABRIC |
| MB-5465      | ASCL4 | cna | hetloss | METABRIC |
| MB-6098      | ASCL4 | cna | hetloss | METABRIC |
| MB-7048      | ASCL4 | cna | hetloss | METABRIC |
| PD10014      | ASCL4 | cna | gain    | BASIS    |
| PD11327      | ASCL4 | cna | gain    | BASIS    |
| PD11742      | ASCL4 | cna | hetloss | BASIS    |
| PD13296      | ASCL4 | cna | hetloss | BASIS    |
| PD13297      | ASCL4 | cna | gain    | BASIS    |
| PD22355      | ASCL4 | cna | hetloss | BASIS    |
| PD23574      | ASCL4 | cna | gain    | BASIS    |
| PD3890       | ASCL4 | cna | hetloss | BASIS    |
| PD3905       | ASCL4 | cna | gain    | BASIS    |
| PD4005       | ASCL4 | cna | hetloss | BASIS    |
| PD4006       | ASCL4 | cna | gain    | BASIS    |
| PD4107       | ASCL4 | cna | gain    | BASIS    |
| PD4826       | ASCL4 | cna | gain    | BASIS    |
| PD5948       | ASCL4 | cna | gain    | BASIS    |
| PD6406       | ASCL4 | cna | hetloss | BASIS    |
| PD6413       | ASCL4 | cna | hetloss | BASIS    |
| PD6731       | ASCL4 | cna | hetloss | BASIS    |
| PD7067       | ASCL4 | cna | gain    | BASIS    |
| PD7215       | ASCL4 | cna | hetloss | BASIS    |
| PD8621       | ASCL4 | cna | hetloss | BASIS    |
| PD9004       | ASCL4 | cna | hetloss | BASIS    |
| PD9585       | ASCL4 | cna | hetloss | BASIS    |
| PD9702       | ASCL4 | cna | gain    | BASIS    |
| TCGA-AN-A0XU | ATR   | cna | gain    | TCGA     |
| TCGA-BH-A0C0 | ATR   | cna | gain    | TCGA     |
| TCGA-BH-A18R | ATR   | cna | gain    | TCGA     |
| TCGA-BH-A1FU | ATR   | cna | hetloss | TCGA     |
| TCGA-C8-A12L | ATR   | cna | gain    | TCGA     |
| TCGA-E2-A1L7 | ATR   | cna | gain    | TCGA     |
| TCGA-E9-A1NC | ATR   | cna | gain    | TCGA     |
| TCGA-LL-A5YP | ATR   | cna | gain    | TCGA     |
| MB-0346      | ATR   | cna | hetloss | METABRIC |
| MB-2827      | ATR   | cna | hetloss | METABRIC |

|                   |      |     |         |            |
|-------------------|------|-----|---------|------------|
| MB-5070           | ATR  | cna | amp     | METABRIC   |
| MB-5107           | ATR  | cna | gain    | METABRIC   |
| MB-5465           | ATR  | cna | gain    | METABRIC   |
| MB-7038           | ATR  | cna | gain    | METABRIC   |
| MB-0420           | ATR  | cna | gain    | METABRIC   |
| P-0002858-T01-IM3 | ATR  | cna | amp     | MSK-IMPACT |
| PD10014           | ATR  | cna | gain    | BASIS      |
| PD11327           | ATR  | cna | gain    | BASIS      |
| PD13299           | ATR  | cna | gain    | BASIS      |
| PD13771           | ATR  | cna | hetloss | BASIS      |
| PD22355           | ATR  | cna | gain    | BASIS      |
| PD23561           | ATR  | cna | hetloss | BASIS      |
| PD23574           | ATR  | cna | gain    | BASIS      |
| PD23578           | ATR  | cna | gain    | BASIS      |
| PD24186           | ATR  | cna | gain    | BASIS      |
| PD24206           | ATR  | cna | hetloss | BASIS      |
| PD3905            | ATR  | cna | gain    | BASIS      |
| PD4107            | ATR  | cna | gain    | BASIS      |
| PD5935            | ATR  | cna | gain    | BASIS      |
| PD5945            | ATR  | cna | gain    | BASIS      |
| PD5948            | ATR  | cna | gain    | BASIS      |
| PD6731            | ATR  | cna | gain    | BASIS      |
| PD7067            | ATR  | cna | gain    | BASIS      |
| PD7215            | ATR  | cna | gain    | BASIS      |
| PD8621            | ATR  | cna | gain    | BASIS      |
| PD8980            | ATR  | cna | gain    | BASIS      |
| PD9004            | ATR  | cna | gain    | BASIS      |
| PD9702            | ATR  | cna | gain    | BASIS      |
| TCGA-A2-A25B      | ATRX | cna | gain    | TCGA       |
| TCGA-AN-A0XU      | ATRX | cna | hetloss | TCGA       |
| TCGA-AO-A0JL      | ATRX | cna | gain    | TCGA       |
| TCGA-BH-A0AW      | ATRX | cna | gain    | TCGA       |
| TCGA-C8-A12L      | ATRX | cna | hetloss | TCGA       |
| TCGA-E2-A1L7      | ATRX | cna | hetloss | TCGA       |
| TCGA-E9-A1NC      | ATRX | cna | hetloss | TCGA       |
| MB-0346           | ATRX | cna | hetloss | METABRIC   |
| MB-2827           | ATRX | cna | hetloss | METABRIC   |
| MB-5465           | ATRX | cna | gain    | METABRIC   |
| MB-6060           | ATRX | cna | hetloss | METABRIC   |
| MB-0420           | ATRX | cna | hetloss | METABRIC   |
| PD10014           | ATRX | cna | hetloss | BASIS      |
| PD11327           | ATRX | cna | hetloss | BASIS      |
| PD13296           | ATRX | cna | amp     | BASIS      |
| PD13299           | ATRX | cna | gain    | BASIS      |
| PD13771           | ATRX | cna | gain    | BASIS      |
| PD14442           | ATRX | cna | gain    | BASIS      |
| PD23562           | ATRX | cna | hetloss | BASIS      |

|              |       |     |         |          |
|--------------|-------|-----|---------|----------|
| PD23574      | ATRX  | cna | gain    | BASIS    |
| PD24186      | ATRX  | cna | gain    | BASIS    |
| PD24202      | ATRX  | cna | hetloss | BASIS    |
| PD24206      | ATRX  | cna | gain    | BASIS    |
| PD3905       | ATRX  | cna | gain    | BASIS    |
| PD4005       | ATRX  | cna | hetloss | BASIS    |
| PD4006       | ATRX  | cna | gain    | BASIS    |
| PD4107       | ATRX  | cna | gain    | BASIS    |
| PD4826       | ATRX  | cna | gain    | BASIS    |
| PD4967       | ATRX  | cna | gain    | BASIS    |
| PD5930       | ATRX  | cna | gain    | BASIS    |
| PD5935       | ATRX  | cna | gain    | BASIS    |
| PD5948       | ATRX  | cna | gain    | BASIS    |
| PD6406       | ATRX  | cna | gain    | BASIS    |
| PD6413       | ATRX  | cna | gain    | BASIS    |
| PD7067       | ATRX  | cna | gain    | BASIS    |
| PD7215       | ATRX  | cna | gain    | BASIS    |
| PD8621       | ATRX  | cna | gain    | BASIS    |
| PD9004       | ATRX  | cna | gain    | BASIS    |
| TCGA-A2-A25B | BCL7A | cna | gain    | TCGA     |
| TCGA-AN-A0XU | BCL7A | cna | hetloss | TCGA     |
| TCGA-AO-A0JL | BCL7A | cna | hetloss | TCGA     |
| TCGA-BH-A0C0 | BCL7A | cna | hetloss | TCGA     |
| TCGA-BH-A18R | BCL7A | cna | gain    | TCGA     |
| TCGA-BH-A1FU | BCL7A | cna | hetloss | TCGA     |
| TCGA-D8-A27M | BCL7A | cna | hetloss | TCGA     |
| TCGA-E2-A1L7 | BCL7A | cna | hetloss | TCGA     |
| TCGA-LL-A5YP | BCL7A | cna | hetloss | TCGA     |
| MB-0346      | BCL7A | cna | gain    | METABRIC |
| MB-2827      | BCL7A | cna | hetloss | METABRIC |
| MB-5070      | BCL7A | cna | hetloss | METABRIC |
| MB-7048      | BCL7A | cna | hetloss | METABRIC |
| MTS-T0064    | BCL7A | cna | gain    | METABRIC |
| PD11327      | BCL7A | cna | homdel  | BASIS    |
| PD13296      | BCL7A | cna | hetloss | BASIS    |
| PD13297      | BCL7A | cna | gain    | BASIS    |
| PD13771      | BCL7A | cna | gain    | BASIS    |
| PD22355      | BCL7A | cna | hetloss | BASIS    |
| PD23574      | BCL7A | cna | gain    | BASIS    |
| PD23578      | BCL7A | cna | hetloss | BASIS    |
| PD24206      | BCL7A | cna | hetloss | BASIS    |
| PD3890       | BCL7A | cna | hetloss | BASIS    |
| PD3905       | BCL7A | cna | gain    | BASIS    |
| PD4005       | BCL7A | cna | hetloss | BASIS    |
| PD4006       | BCL7A | cna | amp     | BASIS    |
| PD4107       | BCL7A | cna | gain    | BASIS    |
| PD4826       | BCL7A | cna | gain    | BASIS    |

|              |         |     |         |          |
|--------------|---------|-----|---------|----------|
| PD4967       | BCL7A   | cna | hetloss | BASIS    |
| PD5935       | BCL7A   | cna | gain    | BASIS    |
| PD5945       | BCL7A   | cna | gain    | BASIS    |
| PD5948       | BCL7A   | cna | gain    | BASIS    |
| PD6406       | BCL7A   | cna | hetloss | BASIS    |
| PD6731       | BCL7A   | cna | hetloss | BASIS    |
| PD7067       | BCL7A   | cna | gain    | BASIS    |
| PD9004       | BCL7A   | cna | hetloss | BASIS    |
| PD9585       | BCL7A   | cna | hetloss | BASIS    |
| PD9702       | BCL7A   | cna | gain    | BASIS    |
| TCGA-AN-A0XU | CCDC160 | cna | hetloss | TCGA     |
| TCGA-BH-A0AW | CCDC160 | cna | gain    | TCGA     |
| TCGA-C8-A12L | CCDC160 | cna | gain    | TCGA     |
| TCGA-E2-A1L7 | CCDC160 | cna | hetloss | TCGA     |
| TCGA-E9-A1NC | CCDC160 | cna | hetloss | TCGA     |
| TCGA-LL-A5YP | CCDC160 | cna | gain    | TCGA     |
| MB-0346      | CCDC160 | cna | hetloss | METABRIC |
| MB-2827      | CCDC160 | cna | hetloss | METABRIC |
| MB-5465      | CCDC160 | cna | hetloss | METABRIC |
| MB-6060      | CCDC160 | cna | gain    | METABRIC |
| MB-6098      | CCDC160 | cna | hetloss | METABRIC |
| MB-7038      | CCDC160 | cna | gain    | METABRIC |
| PD10014      | CCDC160 | cna | hetloss | BASIS    |
| PD13296      | CCDC160 | cna | amp     | BASIS    |
| PD13299      | CCDC160 | cna | amp     | BASIS    |
| PD13771      | CCDC160 | cna | gain    | BASIS    |
| PD14442      | CCDC160 | cna | gain    | BASIS    |
| PD23562      | CCDC160 | cna | hetloss | BASIS    |
| PD23574      | CCDC160 | cna | gain    | BASIS    |
| PD23578      | CCDC160 | cna | hetloss | BASIS    |
| PD24202      | CCDC160 | cna | hetloss | BASIS    |
| PD24206      | CCDC160 | cna | gain    | BASIS    |
| PD3890       | CCDC160 | cna | hetloss | BASIS    |
| PD3905       | CCDC160 | cna | gain    | BASIS    |
| PD4006       | CCDC160 | cna | gain    | BASIS    |
| PD4107       | CCDC160 | cna | gain    | BASIS    |
| PD4826       | CCDC160 | cna | gain    | BASIS    |
| PD4967       | CCDC160 | cna | gain    | BASIS    |
| PD5930       | CCDC160 | cna | gain    | BASIS    |
| PD5935       | CCDC160 | cna | gain    | BASIS    |
| PD5945       | CCDC160 | cna | gain    | BASIS    |
| PD5948       | CCDC160 | cna | gain    | BASIS    |
| PD6406       | CCDC160 | cna | gain    | BASIS    |
| PD6413       | CCDC160 | cna | gain    | BASIS    |
| PD7215       | CCDC160 | cna | gain    | BASIS    |
| PD8621       | CCDC160 | cna | amp     | BASIS    |
| PD8980       | CCDC160 | cna | hetloss | BASIS    |

|                   |         |     |         |            |
|-------------------|---------|-----|---------|------------|
| PD9004            | CCDC160 | cna | gain    | BASIS      |
| TCGA-A2-A25B      | CD274   | cna | hetloss | TCGA       |
| TCGA-AO-A0JL      | CD274   | cna | gain    | TCGA       |
| TCGA-BH-A0AW      | CD274   | cna | hetloss | TCGA       |
| TCGA-BH-A0C0      | CD274   | cna | hetloss | TCGA       |
| TCGA-BH-A1FU      | CD274   | cna | hetloss | TCGA       |
| TCGA-C8-A12L      | CD274   | cna | hetloss | TCGA       |
| TCGA-E2-A1L7      | CD274   | cna | hetloss | TCGA       |
| MB-0346           | CD274   | cna | gain    | METABRIC   |
| MB-2827           | CD274   | cna | hetloss | METABRIC   |
| MB-6060           | CD274   | cna | gain    | METABRIC   |
| MB-0420           | CD274   | cna | hetloss | METABRIC   |
| MTS-T0064         | CD274   | cna | amp     | METABRIC   |
| P-0009557-T01-IM5 | CD274   | cna | amp     | MSK-IMPACT |
| PD11327           | CD274   | cna | homdel  | BASIS      |
| PD13296           | CD274   | cna | gain    | BASIS      |
| PD13297           | CD274   | cna | hetloss | BASIS      |
| PD13299           | CD274   | cna | amp     | BASIS      |
| PD22355           | CD274   | cna | gain    | BASIS      |
| PD23574           | CD274   | cna | amp     | BASIS      |
| PD24186           | CD274   | cna | gain    | BASIS      |
| PD24337           | CD274   | cna | gain    | BASIS      |
| PD3905            | CD274   | cna | gain    | BASIS      |
| PD4006            | CD274   | cna | gain    | BASIS      |
| PD4107            | CD274   | cna | gain    | BASIS      |
| PD4826            | CD274   | cna | gain    | BASIS      |
| PD4967            | CD274   | cna | hetloss | BASIS      |
| PD5945            | CD274   | cna | gain    | BASIS      |
| PD5948            | CD274   | cna | hetloss | BASIS      |
| PD6406            | CD274   | cna | homdel  | BASIS      |
| PD6413            | CD274   | cna | gain    | BASIS      |
| PD6731            | CD274   | cna | gain    | BASIS      |
| PD7067            | CD274   | cna | amp     | BASIS      |
| PD7215            | CD274   | cna | hetloss | BASIS      |
| PD8621            | CD274   | cna | gain    | BASIS      |
| PD8980            | CD274   | cna | gain    | BASIS      |
| PD9004            | CD274   | cna | gain    | BASIS      |
| PD9585            | CD274   | cna | hetloss | BASIS      |
| PD9702            | CD274   | cna | gain    | BASIS      |
| TCGA-AN-A0XU      | CDK8    | cna | hetloss | TCGA       |
| TCGA-AO-A0JL      | CDK8    | cna | hetloss | TCGA       |
| TCGA-BH-A0AW      | CDK8    | cna | hetloss | TCGA       |
| TCGA-BH-A0C0      | CDK8    | cna | gain    | TCGA       |
| TCGA-BH-A1FU      | CDK8    | cna | hetloss | TCGA       |
| TCGA-C8-A12L      | CDK8    | cna | hetloss | TCGA       |
| TCGA-D8-A27M      | CDK8    | cna | gain    | TCGA       |
| TCGA-E9-A1NC      | CDK8    | cna | hetloss | TCGA       |



|              |      |     |         |          |
|--------------|------|-----|---------|----------|
| TCGA-EW-A10X | CDK8 | cna | homdel  | TCGA     |
| TCGA-LL-A5YP | CDK8 | cna | hetloss | TCGA     |
| MB-0346      | CDK8 | cna | amp     | METABRIC |
| MB-2827      | CDK8 | cna | hetloss | METABRIC |
| MB-6098      | CDK8 | cna | hetloss | METABRIC |
| MB-7032      | CDK8 | cna | gain    | METABRIC |
| PD10014      | CDK8 | cna | hetloss | BASIS    |
| PD13296      | CDK8 | cna | hetloss | BASIS    |
| PD13297      | CDK8 | cna | hetloss | BASIS    |
| PD13771      | CDK8 | cna | hetloss | BASIS    |
| PD14442      | CDK8 | cna | hetloss | BASIS    |
| PD22355      | CDK8 | cna | hetloss | BASIS    |
| PD23562      | CDK8 | cna | gain    | BASIS    |
| PD24202      | CDK8 | cna | hetloss | BASIS    |
| PD24206      | CDK8 | cna | gain    | BASIS    |
| PD24337      | CDK8 | cna | hetloss | BASIS    |
| PD3890       | CDK8 | cna | hetloss | BASIS    |
| PD3905       | CDK8 | cna | gain    | BASIS    |
| PD4005       | CDK8 | cna | hetloss | BASIS    |
| PD4006       | CDK8 | cna | gain    | BASIS    |
| PD4107       | CDK8 | cna | gain    | BASIS    |
| PD4826       | CDK8 | cna | hetloss | BASIS    |
| PD4967       | CDK8 | cna | hetloss | BASIS    |
| PD5945       | CDK8 | cna | amp     | BASIS    |
| PD6406       | CDK8 | cna | hetloss | BASIS    |
| PD6413       | CDK8 | cna | hetloss | BASIS    |
| PD6731       | CDK8 | cna | hetloss | BASIS    |
| PD7067       | CDK8 | cna | gain    | BASIS    |
| PD8980       | CDK8 | cna | hetloss | BASIS    |
| PD9702       | CDK8 | cna | gain    | BASIS    |
| TCGA-A2-A25B | CRBN | cna | gain    | TCGA     |
| TCGA-AN-A0XU | CRBN | cna | gain    | TCGA     |
| TCGA-BH-A0C0 | CRBN | cna | gain    | TCGA     |
| TCGA-BH-A18R | CRBN | cna | gain    | TCGA     |
| TCGA-BH-A1FU | CRBN | cna | hetloss | TCGA     |
| TCGA-C8-A12L | CRBN | cna | amp     | TCGA     |
| TCGA-D8-A27M | CRBN | cna | hetloss | TCGA     |
| TCGA-E9-A1NC | CRBN | cna | hetloss | TCGA     |
| TCGA-LL-A5YP | CRBN | cna | amp     | TCGA     |
| MB-7038      | CRBN | cna | hetloss | METABRIC |
| MB-7048      | CRBN | cna | hetloss | METABRIC |
| MB-0420      | CRBN | cna | hetloss | METABRIC |
| PD10014      | CRBN | cna | hetloss | BASIS    |
| PD11327      | CRBN | cna | gain    | BASIS    |
| PD11742      | CRBN | cna | gain    | BASIS    |
| PD13296      | CRBN | cna | gain    | BASIS    |
| PD13297      | CRBN | cna | gain    | BASIS    |

|              |       |     |         |          |
|--------------|-------|-----|---------|----------|
| PD13299      | CRBN  | cna | gain    | BASIS    |
| PD23561      | CRBN  | cna | hetloss | BASIS    |
| PD23562      | CRBN  | cna | gain    | BASIS    |
| PD23574      | CRBN  | cna | gain    | BASIS    |
| PD23578      | CRBN  | cna | hetloss | BASIS    |
| PD24186      | CRBN  | cna | gain    | BASIS    |
| PD24206      | CRBN  | cna | gain    | BASIS    |
| PD24337      | CRBN  | cna | gain    | BASIS    |
| PD3905       | CRBN  | cna | gain    | BASIS    |
| PD4005       | CRBN  | cna | hetloss | BASIS    |
| PD4107       | CRBN  | cna | hetloss | BASIS    |
| PD4826       | CRBN  | cna | gain    | BASIS    |
| PD5945       | CRBN  | cna | amp     | BASIS    |
| PD5948       | CRBN  | cna | gain    | BASIS    |
| PD6406       | CRBN  | cna | hetloss | BASIS    |
| PD6731       | CRBN  | cna | hetloss | BASIS    |
| PD7215       | CRBN  | cna | gain    | BASIS    |
| PD8980       | CRBN  | cna | gain    | BASIS    |
| PD9004       | CRBN  | cna | gain    | BASIS    |
| PD9585       | CRBN  | cna | hetloss | BASIS    |
| PD9702       | CRBN  | cna | gain    | BASIS    |
| TCGA-A2-A25B | CUL4A | cna | hetloss | TCGA     |
| TCGA-AN-A0XU | CUL4A | cna | gain    | TCGA     |
| TCGA-AO-A0JL | CUL4A | cna | hetloss | TCGA     |
| TCGA-BH-A0C0 | CUL4A | cna | hetloss | TCGA     |
| TCGA-BH-A1FU | CUL4A | cna | hetloss | TCGA     |
| TCGA-C8-A12L | CUL4A | cna | gain    | TCGA     |
| TCGA-D8-A27M | CUL4A | cna | gain    | TCGA     |
| TCGA-LL-A5YP | CUL4A | cna | hetloss | TCGA     |
| MB-0346      | CUL4A | cna | hetloss | METABRIC |
| MB-5107      | CUL4A | cna | hetloss | METABRIC |
| MB-5465      | CUL4A | cna | gain    | METABRIC |
| MB-6060      | CUL4A | cna | hetloss | METABRIC |
| MB-7032      | CUL4A | cna | hetloss | METABRIC |
| MB-0420      | CUL4A | cna | amp     | METABRIC |
| MTS-T0064    | CUL4A | cna | hetloss | METABRIC |
| PD10014      | CUL4A | cna | hetloss | BASIS    |
| PD11327      | CUL4A | cna | amp     | BASIS    |
| PD13299      | CUL4A | cna | gain    | BASIS    |
| PD14442      | CUL4A | cna | hetloss | BASIS    |
| PD23562      | CUL4A | cna | gain    | BASIS    |
| PD23574      | CUL4A | cna | gain    | BASIS    |
| PD23578      | CUL4A | cna | gain    | BASIS    |
| PD24186      | CUL4A | cna | gain    | BASIS    |
| PD24202      | CUL4A | cna | gain    | BASIS    |
| PD24206      | CUL4A | cna | amp     | BASIS    |
| PD24337      | CUL4A | cna | hetloss | BASIS    |

|              |       |     |         |          |
|--------------|-------|-----|---------|----------|
| PD3905       | CUL4A | cna | gain    | BASIS    |
| PD4107       | CUL4A | cna | hetloss | BASIS    |
| PD4826       | CUL4A | cna | hetloss | BASIS    |
| PD4967       | CUL4A | cna | hetloss | BASIS    |
| PD5945       | CUL4A | cna | amp     | BASIS    |
| PD5948       | CUL4A | cna | hetloss | BASIS    |
| PD6731       | CUL4A | cna | hetloss | BASIS    |
| PD7215       | CUL4A | cna | gain    | BASIS    |
| PD8621       | CUL4A | cna | amp     | BASIS    |
| PD8980       | CUL4A | cna | hetloss | BASIS    |
| PD9585       | CUL4A | cna | gain    | BASIS    |
| PD9702       | CUL4A | cna | gain    | BASIS    |
| TCGA-A2-A25B | DEK   | cna | gain    | TCGA     |
| TCGA-AN-A0XU | DEK   | cna | amp     | TCGA     |
| TCGA-AO-A0JL | DEK   | cna | gain    | TCGA     |
| TCGA-BH-A0AW | DEK   | cna | gain    | TCGA     |
| TCGA-BH-A0C0 | DEK   | cna | hetloss | TCGA     |
| TCGA-C8-A12L | DEK   | cna | hetloss | TCGA     |
| TCGA-D8-A27M | DEK   | cna | hetloss | TCGA     |
| TCGA-E2-A1L7 | DEK   | cna | hetloss | TCGA     |
| MB-5070      | DEK   | cna | amp     | METABRIC |
| MB-5465      | DEK   | cna | gain    | METABRIC |
| MB-6060      | DEK   | cna | gain    | METABRIC |
| MB-6098      | DEK   | cna | hetloss | METABRIC |
| MB-7032      | DEK   | cna | gain    | METABRIC |
| PD11327      | DEK   | cna | gain    | BASIS    |
| PD13296      | DEK   | cna | gain    | BASIS    |
| PD13297      | DEK   | cna | gain    | BASIS    |
| PD13299      | DEK   | cna | amp     | BASIS    |
| PD22355      | DEK   | cna | gain    | BASIS    |
| PD23562      | DEK   | cna | gain    | BASIS    |
| PD23574      | DEK   | cna | gain    | BASIS    |
| PD24186      | DEK   | cna | gain    | BASIS    |
| PD24202      | DEK   | cna | gain    | BASIS    |
| PD24206      | DEK   | cna | gain    | BASIS    |
| PD3905       | DEK   | cna | amp     | BASIS    |
| PD4005       | DEK   | cna | hetloss | BASIS    |
| PD4006       | DEK   | cna | gain    | BASIS    |
| PD4107       | DEK   | cna | gain    | BASIS    |
| PD4826       | DEK   | cna | gain    | BASIS    |
| PD5935       | DEK   | cna | gain    | BASIS    |
| PD5945       | DEK   | cna | amp     | BASIS    |
| PD5948       | DEK   | cna | gain    | BASIS    |
| PD6731       | DEK   | cna | hetloss | BASIS    |
| PD7067       | DEK   | cna | gain    | BASIS    |
| PD7215       | DEK   | cna | gain    | BASIS    |
| PD8621       | DEK   | cna | amp     | BASIS    |

|              |        |     |         |          |
|--------------|--------|-----|---------|----------|
| PD9004       | DEK    | cna | gain    | BASIS    |
| PD9585       | DEK    | cna | hetloss | BASIS    |
| PD9702       | DEK    | cna | gain    | BASIS    |
| TCGA-A2-A25B | EIF4A2 | cna | amp     | TCGA     |
| TCGA-AN-A0XU | EIF4A2 | cna | gain    | TCGA     |
| TCGA-BH-A0AW | EIF4A2 | cna | gain    | TCGA     |
| TCGA-BH-A0C0 | EIF4A2 | cna | gain    | TCGA     |
| TCGA-BH-A1FU | EIF4A2 | cna | hetloss | TCGA     |
| TCGA-C8-A12L | EIF4A2 | cna | gain    | TCGA     |
| TCGA-LL-A5YP | EIF4A2 | cna | gain    | TCGA     |
| MB-0346      | EIF4A2 | cna | gain    | METABRIC |
| MB-5070      | EIF4A2 | cna | hetloss | METABRIC |
| MB-5107      | EIF4A2 | cna | amp     | METABRIC |
| MB-5465      | EIF4A2 | cna | gain    | METABRIC |
| MB-6060      | EIF4A2 | cna | gain    | METABRIC |
| MB-6098      | EIF4A2 | cna | gain    | METABRIC |
| MB-7038      | EIF4A2 | cna | hetloss | METABRIC |
| PD11327      | EIF4A2 | cna | homdel  | BASIS    |
| PD13299      | EIF4A2 | cna | gain    | BASIS    |
| PD13771      | EIF4A2 | cna | hetloss | BASIS    |
| PD22355      | EIF4A2 | cna | gain    | BASIS    |
| PD23561      | EIF4A2 | cna | hetloss | BASIS    |
| PD23562      | EIF4A2 | cna | gain    | BASIS    |
| PD23578      | EIF4A2 | cna | gain    | BASIS    |
| PD24186      | EIF4A2 | cna | amp     | BASIS    |
| PD24202      | EIF4A2 | cna | gain    | BASIS    |
| PD3905       | EIF4A2 | cna | gain    | BASIS    |
| PD4005       | EIF4A2 | cna | gain    | BASIS    |
| PD4107       | EIF4A2 | cna | gain    | BASIS    |
| PD4826       | EIF4A2 | cna | gain    | BASIS    |
| PD5930       | EIF4A2 | cna | gain    | BASIS    |
| PD5945       | EIF4A2 | cna | amp     | BASIS    |
| PD5948       | EIF4A2 | cna | gain    | BASIS    |
| PD6406       | EIF4A2 | cna | gain    | BASIS    |
| PD6731       | EIF4A2 | cna | gain    | BASIS    |
| PD7067       | EIF4A2 | cna | gain    | BASIS    |
| PD7215       | EIF4A2 | cna | gain    | BASIS    |
| PD8621       | EIF4A2 | cna | gain    | BASIS    |
| PD8980       | EIF4A2 | cna | gain    | BASIS    |
| PD9004       | EIF4A2 | cna | gain    | BASIS    |
| PD9702       | EIF4A2 | cna | gain    | BASIS    |
| TCGA-AN-A0XU | EPHB1  | cna | gain    | TCGA     |
| TCGA-BH-A0C0 | EPHB1  | cna | gain    | TCGA     |
| TCGA-BH-A18R | EPHB1  | cna | gain    | TCGA     |
| TCGA-BH-A1FU | EPHB1  | cna | hetloss | TCGA     |
| TCGA-C8-A12L | EPHB1  | cna | gain    | TCGA     |
| TCGA-E2-A1L7 | EPHB1  | cna | gain    | TCGA     |

|              |       |     |         |          |
|--------------|-------|-----|---------|----------|
| TCGA-E9-A1NC | EPHB1 | cna | gain    | TCGA     |
| TCGA-LL-A5YP | EPHB1 | cna | gain    | TCGA     |
| MB-0346      | EPHB1 | cna | hetloss | METABRIC |
| MB-5070      | EPHB1 | cna | gain    | METABRIC |
| MB-5107      | EPHB1 | cna | gain    | METABRIC |
| MB-5465      | EPHB1 | cna | gain    | METABRIC |
| MB-7038      | EPHB1 | cna | gain    | METABRIC |
| MTS-T0064    | EPHB1 | cna | gain    | METABRIC |
| PD10014      | EPHB1 | cna | gain    | BASIS    |
| PD11327      | EPHB1 | cna | gain    | BASIS    |
| PD13297      | EPHB1 | cna | hetloss | BASIS    |
| PD13299      | EPHB1 | cna | gain    | BASIS    |
| PD13771      | EPHB1 | cna | hetloss | BASIS    |
| PD23561      | EPHB1 | cna | hetloss | BASIS    |
| PD23574      | EPHB1 | cna | gain    | BASIS    |
| PD23578      | EPHB1 | cna | gain    | BASIS    |
| PD24186      | EPHB1 | cna | gain    | BASIS    |
| PD24202      | EPHB1 | cna | gain    | BASIS    |
| PD24206      | EPHB1 | cna | gain    | BASIS    |
| PD3905       | EPHB1 | cna | gain    | BASIS    |
| PD4107       | EPHB1 | cna | gain    | BASIS    |
| PD4826       | EPHB1 | cna | gain    | BASIS    |
| PD5935       | EPHB1 | cna | gain    | BASIS    |
| PD5945       | EPHB1 | cna | gain    | BASIS    |
| PD5948       | EPHB1 | cna | gain    | BASIS    |
| PD6731       | EPHB1 | cna | gain    | BASIS    |
| PD7067       | EPHB1 | cna | gain    | BASIS    |
| PD7215       | EPHB1 | cna | gain    | BASIS    |
| PD8621       | EPHB1 | cna | gain    | BASIS    |
| PD8980       | EPHB1 | cna | gain    | BASIS    |
| PD9004       | EPHB1 | cna | gain    | BASIS    |
| PD9702       | EPHB1 | cna | gain    | BASIS    |
| TCGA-AN-A0XU | FANCA | cna | gain    | TCGA     |
| TCGA-AO-A0JL | FANCA | cna | gain    | TCGA     |
| TCGA-BH-A0AW | FANCA | cna | hetloss | TCGA     |
| TCGA-BH-A0C0 | FANCA | cna | gain    | TCGA     |
| TCGA-C8-A12L | FANCA | cna | hetloss | TCGA     |
| TCGA-E2-A1L7 | FANCA | cna | hetloss | TCGA     |
| TCGA-E9-A1NC | FANCA | cna | hetloss | TCGA     |
| TCGA-LL-A5YP | FANCA | cna | gain    | TCGA     |
| MB-0346      | FANCA | cna | gain    | METABRIC |
| MB-5107      | FANCA | cna | hetloss | METABRIC |
| MB-6271      | FANCA | cna | hetloss | METABRIC |
| MB-7032      | FANCA | cna | hetloss | METABRIC |
| MB-7038      | FANCA | cna | gain    | METABRIC |
| MB-7048      | FANCA | cna | hetloss | METABRIC |
| MB-0420      | FANCA | cna | hetloss | METABRIC |

|              |       |     |         |          |
|--------------|-------|-----|---------|----------|
| PD10014      | FANCA | cna | hetloss | BASIS    |
| PD11327      | FANCA | cna | gain    | BASIS    |
| PD11742      | FANCA | cna | hetloss | BASIS    |
| PD13296      | FANCA | cna | hetloss | BASIS    |
| PD13297      | FANCA | cna | hetloss | BASIS    |
| PD13299      | FANCA | cna | gain    | BASIS    |
| PD14442      | FANCA | cna | hetloss | BASIS    |
| PD23562      | FANCA | cna | gain    | BASIS    |
| PD23574      | FANCA | cna | gain    | BASIS    |
| PD24202      | FANCA | cna | hetloss | BASIS    |
| PD3890       | FANCA | cna | gain    | BASIS    |
| PD3905       | FANCA | cna | gain    | BASIS    |
| PD4006       | FANCA | cna | gain    | BASIS    |
| PD4107       | FANCA | cna | amp     | BASIS    |
| PD4967       | FANCA | cna | hetloss | BASIS    |
| PD5930       | FANCA | cna | hetloss | BASIS    |
| PD5945       | FANCA | cna | amp     | BASIS    |
| PD5948       | FANCA | cna | gain    | BASIS    |
| PD7215       | FANCA | cna | gain    | BASIS    |
| PD8621       | FANCA | cna | gain    | BASIS    |
| PD9004       | FANCA | cna | gain    | BASIS    |
| PD9585       | FANCA | cna | hetloss | BASIS    |
| PD9702       | FANCA | cna | gain    | BASIS    |
| TCGA-A2-A25B | FANCM | cna | hetloss | TCGA     |
| TCGA-AN-A0XU | FANCM | cna | hetloss | TCGA     |
| TCGA-AO-A0JL | FANCM | cna | hetloss | TCGA     |
| TCGA-BH-A0AW | FANCM | cna | hetloss | TCGA     |
| TCGA-BH-A1FU | FANCM | cna | gain    | TCGA     |
| TCGA-C8-A12L | FANCM | cna | hetloss | TCGA     |
| TCGA-D8-A27M | FANCM | cna | hetloss | TCGA     |
| TCGA-LL-A5YP | FANCM | cna | hetloss | TCGA     |
| MB-5070      | FANCM | cna | hetloss | METABRIC |
| MB-5465      | FANCM | cna | hetloss | METABRIC |
| MB-6060      | FANCM | cna | gain    | METABRIC |
| PD10014      | FANCM | cna | hetloss | BASIS    |
| PD11327      | FANCM | cna | gain    | BASIS    |
| PD13297      | FANCM | cna | hetloss | BASIS    |
| PD13771      | FANCM | cna | gain    | BASIS    |
| PD22355      | FANCM | cna | hetloss | BASIS    |
| PD23578      | FANCM | cna | hetloss | BASIS    |
| PD24186      | FANCM | cna | gain    | BASIS    |
| PD24202      | FANCM | cna | hetloss | BASIS    |
| PD24206      | FANCM | cna | gain    | BASIS    |
| PD24337      | FANCM | cna | hetloss | BASIS    |
| PD3890       | FANCM | cna | hetloss | BASIS    |
| PD3905       | FANCM | cna | gain    | BASIS    |
| PD4005       | FANCM | cna | hetloss | BASIS    |

|              |       |     |         |          |
|--------------|-------|-----|---------|----------|
| PD4006       | FANCM | cna | hetloss | BASIS    |
| PD4107       | FANCM | cna | hetloss | BASIS    |
| PD4826       | FANCM | cna | gain    | BASIS    |
| PD5930       | FANCM | cna | hetloss | BASIS    |
| PD5945       | FANCM | cna | gain    | BASIS    |
| PD5948       | FANCM | cna | gain    | BASIS    |
| PD6406       | FANCM | cna | hetloss | BASIS    |
| PD7067       | FANCM | cna | gain    | BASIS    |
| PD7215       | FANCM | cna | gain    | BASIS    |
| PD8621       | FANCM | cna | gain    | BASIS    |
| PD8980       | FANCM | cna | gain    | BASIS    |
| PD9004       | FANCM | cna | gain    | BASIS    |
| PD9585       | FANCM | cna | gain    | BASIS    |
| PD9702       | FANCM | cna | gain    | BASIS    |
| TCGA-A2-A25B | FAT4  | cna | gain    | TCGA     |
| TCGA-AN-A0XU | FAT4  | cna | gain    | TCGA     |
| TCGA-BH-A0AW | FAT4  | cna | hetloss | TCGA     |
| TCGA-BH-A0C0 | FAT4  | cna | hetloss | TCGA     |
| TCGA-BH-A1FU | FAT4  | cna | gain    | TCGA     |
| TCGA-C8-A12L | FAT4  | cna | hetloss | TCGA     |
| TCGA-D8-A27M | FAT4  | cna | hetloss | TCGA     |
| TCGA-E2-A1L7 | FAT4  | cna | hetloss | TCGA     |
| TCGA-E9-A1NC | FAT4  | cna | hetloss | TCGA     |
| TCGA-LL-A5YP | FAT4  | cna | gain    | TCGA     |
| MB-5070      | FAT4  | cna | hetloss | METABRIC |
| MB-5465      | FAT4  | cna | gain    | METABRIC |
| MB-7048      | FAT4  | cna | hetloss | METABRIC |
| MB-0420      | FAT4  | cna | hetloss | METABRIC |
| PD11742      | FAT4  | cna | hetloss | BASIS    |
| PD13296      | FAT4  | cna | hetloss | BASIS    |
| PD13297      | FAT4  | cna | hetloss | BASIS    |
| PD22355      | FAT4  | cna | hetloss | BASIS    |
| PD23562      | FAT4  | cna | gain    | BASIS    |
| PD23574      | FAT4  | cna | gain    | BASIS    |
| PD23578      | FAT4  | cna | hetloss | BASIS    |
| PD24202      | FAT4  | cna | hetloss | BASIS    |
| PD24206      | FAT4  | cna | gain    | BASIS    |
| PD24337      | FAT4  | cna | hetloss | BASIS    |
| PD3905       | FAT4  | cna | gain    | BASIS    |
| PD4006       | FAT4  | cna | hetloss | BASIS    |
| PD4107       | FAT4  | cna | gain    | BASIS    |
| PD4826       | FAT4  | cna | gain    | BASIS    |
| PD5935       | FAT4  | cna | gain    | BASIS    |
| PD5945       | FAT4  | cna | amp     | BASIS    |
| PD5948       | FAT4  | cna | hetloss | BASIS    |
| PD6406       | FAT4  | cna | hetloss | BASIS    |
| PD6731       | FAT4  | cna | hetloss | BASIS    |

|              |       |     |         |          |
|--------------|-------|-----|---------|----------|
| PD7067       | FAT4  | cna | gain    | BASIS    |
| PD7215       | FAT4  | cna | gain    | BASIS    |
| PD8621       | FAT4  | cna | hetloss | BASIS    |
| PD8980       | FAT4  | cna | hetloss | BASIS    |
| PD9585       | FAT4  | cna | hetloss | BASIS    |
| TCGA-A2-A25B | FGF14 | cna | hetloss | TCGA     |
| TCGA-AN-A0XU | FGF14 | cna | hetloss | TCGA     |
| TCGA-AO-A0JL | FGF14 | cna | hetloss | TCGA     |
| TCGA-BH-A0C0 | FGF14 | cna | hetloss | TCGA     |
| TCGA-BH-A1FU | FGF14 | cna | hetloss | TCGA     |
| TCGA-C8-A12L | FGF14 | cna | gain    | TCGA     |
| TCGA-D8-A27M | FGF14 | cna | amp     | TCGA     |
| TCGA-LL-A5YP | FGF14 | cna | hetloss | TCGA     |
| MB-5107      | FGF14 | cna | hetloss | METABRIC |
| MB-5465      | FGF14 | cna | gain    | METABRIC |
| MB-6060      | FGF14 | cna | hetloss | METABRIC |
| MB-6098      | FGF14 | cna | gain    | METABRIC |
| MB-0420      | FGF14 | cna | amp     | METABRIC |
| PD10014      | FGF14 | cna | hetloss | BASIS    |
| PD11327      | FGF14 | cna | amp     | BASIS    |
| PD13296      | FGF14 | cna | hetloss | BASIS    |
| PD13299      | FGF14 | cna | gain    | BASIS    |
| PD14442      | FGF14 | cna | hetloss | BASIS    |
| PD23562      | FGF14 | cna | gain    | BASIS    |
| PD23574      | FGF14 | cna | gain    | BASIS    |
| PD23578      | FGF14 | cna | gain    | BASIS    |
| PD24186      | FGF14 | cna | gain    | BASIS    |
| PD24202      | FGF14 | cna | gain    | BASIS    |
| PD24206      | FGF14 | cna | gain    | BASIS    |
| PD24337      | FGF14 | cna | hetloss | BASIS    |
| PD3905       | FGF14 | cna | amp     | BASIS    |
| PD4005       | FGF14 | cna | hetloss | BASIS    |
| PD4006       | FGF14 | cna | hetloss | BASIS    |
| PD4107       | FGF14 | cna | hetloss | BASIS    |
| PD4967       | FGF14 | cna | hetloss | BASIS    |
| PD5945       | FGF14 | cna | amp     | BASIS    |
| PD5948       | FGF14 | cna | hetloss | BASIS    |
| PD6731       | FGF14 | cna | hetloss | BASIS    |
| PD7215       | FGF14 | cna | gain    | BASIS    |
| PD8621       | FGF14 | cna | amp     | BASIS    |
| PD8980       | FGF14 | cna | hetloss | BASIS    |
| PD9585       | FGF14 | cna | gain    | BASIS    |
| PD9702       | FGF14 | cna | gain    | BASIS    |
| TCGA-A2-A25B | FGFR1 | cna | gain    | TCGA     |
| TCGA-AN-A0XU | FGFR1 | cna | hetloss | TCGA     |
| TCGA-AO-A0JL | FGFR1 | cna | gain    | TCGA     |
| TCGA-BH-A0C0 | FGFR1 | cna | hetloss | TCGA     |



|                   |       |     |         |            |
|-------------------|-------|-----|---------|------------|
| TCGA-BH-A1FU      | FGFR1 | cna | homdel  | TCGA       |
| TCGA-D8-A27M      | FGFR1 | cna | hetloss | TCGA       |
| TCGA-E2-A1L7      | FGFR1 | cna | hetloss | TCGA       |
| TCGA-LL-A5YP      | FGFR1 | cna | hetloss | TCGA       |
| MB-0346           | FGFR1 | cna | hetloss | METABRIC   |
| MB-5465           | FGFR1 | cna | hetloss | METABRIC   |
| MB-6060           | FGFR1 | cna | gain    | METABRIC   |
| MB-7038           | FGFR1 | cna | hetloss | METABRIC   |
| MB-0420           | FGFR1 | cna | hetloss | METABRIC   |
| P-0002237-T01-IM3 | FGFR1 | cna | amp     | MSK-IMPACT |
| PD10014           | FGFR1 | cna | hetloss | BASIS      |
| PD11327           | FGFR1 | cna | homdel  | BASIS      |
| PD13296           | FGFR1 | cna | hetloss | BASIS      |
| PD13299           | FGFR1 | cna | gain    | BASIS      |
| PD13771           | FGFR1 | cna | hetloss | BASIS      |
| PD23562           | FGFR1 | cna | gain    | BASIS      |
| PD23578           | FGFR1 | cna | hetloss | BASIS      |
| PD24186           | FGFR1 | cna | gain    | BASIS      |
| PD24202           | FGFR1 | cna | hetloss | BASIS      |
| PD24206           | FGFR1 | cna | amp     | BASIS      |
| PD24337           | FGFR1 | cna | hetloss | BASIS      |
| PD3905            | FGFR1 | cna | gain    | BASIS      |
| PD4006            | FGFR1 | cna | gain    | BASIS      |
| PD4107            | FGFR1 | cna | gain    | BASIS      |
| PD4826            | FGFR1 | cna | hetloss | BASIS      |
| PD5930            | FGFR1 | cna | gain    | BASIS      |
| PD5935            | FGFR1 | cna | gain    | BASIS      |
| PD5945            | FGFR1 | cna | gain    | BASIS      |
| PD7067            | FGFR1 | cna | gain    | BASIS      |
| PD7215            | FGFR1 | cna | amp     | BASIS      |
| PD8980            | FGFR1 | cna | amp     | BASIS      |
| PD9004            | FGFR1 | cna | gain    | BASIS      |
| PD9585            | FGFR1 | cna | hetloss | BASIS      |
| PD9702            | FGFR1 | cna | gain    | BASIS      |
| TCGA-A2-A25B      | HNF1A | cna | gain    | TCGA       |
| TCGA-AN-A0XU      | HNF1A | cna | hetloss | TCGA       |
| TCGA-AO-A0JL      | HNF1A | cna | hetloss | TCGA       |
| TCGA-BH-A0C0      | HNF1A | cna | hetloss | TCGA       |
| TCGA-BH-A18R      | HNF1A | cna | gain    | TCGA       |
| TCGA-BH-A1FU      | HNF1A | cna | hetloss | TCGA       |
| TCGA-D8-A27M      | HNF1A | cna | hetloss | TCGA       |
| TCGA-E2-A1L7      | HNF1A | cna | hetloss | TCGA       |
| TCGA-LL-A5YP      | HNF1A | cna | hetloss | TCGA       |
| MB-0346           | HNF1A | cna | gain    | METABRIC   |
| MB-2827           | HNF1A | cna | hetloss | METABRIC   |
| MB-5070           | HNF1A | cna | hetloss | METABRIC   |
| MB-7048           | HNF1A | cna | hetloss | METABRIC   |

|              |       |     |         |          |
|--------------|-------|-----|---------|----------|
| MTS-T0064    | HNF1A | cna | gain    | METABRIC |
| PD11327      | HNF1A | cna | homdel  | BASIS    |
| PD13296      | HNF1A | cna | hetloss | BASIS    |
| PD13297      | HNF1A | cna | gain    | BASIS    |
| PD13771      | HNF1A | cna | gain    | BASIS    |
| PD22355      | HNF1A | cna | hetloss | BASIS    |
| PD23574      | HNF1A | cna | gain    | BASIS    |
| PD23578      | HNF1A | cna | hetloss | BASIS    |
| PD24206      | HNF1A | cna | homdel  | BASIS    |
| PD3890       | HNF1A | cna | hetloss | BASIS    |
| PD3905       | HNF1A | cna | gain    | BASIS    |
| PD4005       | HNF1A | cna | hetloss | BASIS    |
| PD4006       | HNF1A | cna | amp     | BASIS    |
| PD4107       | HNF1A | cna | gain    | BASIS    |
| PD4826       | HNF1A | cna | gain    | BASIS    |
| PD4967       | HNF1A | cna | hetloss | BASIS    |
| PD5935       | HNF1A | cna | gain    | BASIS    |
| PD5945       | HNF1A | cna | gain    | BASIS    |
| PD5948       | HNF1A | cna | gain    | BASIS    |
| PD6406       | HNF1A | cna | hetloss | BASIS    |
| PD6731       | HNF1A | cna | hetloss | BASIS    |
| PD7067       | HNF1A | cna | gain    | BASIS    |
| PD9004       | HNF1A | cna | hetloss | BASIS    |
| PD9585       | HNF1A | cna | hetloss | BASIS    |
| PD9702       | HNF1A | cna | gain    | BASIS    |
| TCGA-AN-A0XU | IRF1  | cna | hetloss | TCGA     |
| TCGA-AO-A0JL | IRF1  | cna | hetloss | TCGA     |
| TCGA-BH-A0C0 | IRF1  | cna | hetloss | TCGA     |
| TCGA-BH-A1FU | IRF1  | cna | hetloss | TCGA     |
| TCGA-C8-A12L | IRF1  | cna | hetloss | TCGA     |
| TCGA-D8-A27M | IRF1  | cna | hetloss | TCGA     |
| TCGA-E2-A1L7 | IRF1  | cna | gain    | TCGA     |
| TCGA-E9-A1NC | IRF1  | cna | hetloss | TCGA     |
| TCGA-LL-A5YP | IRF1  | cna | hetloss | TCGA     |
| MB-0346      | IRF1  | cna | gain    | METABRIC |
| MB-2827      | IRF1  | cna | hetloss | METABRIC |
| MB-5070      | IRF1  | cna | hetloss | METABRIC |
| MB-5107      | IRF1  | cna | hetloss | METABRIC |
| MB-5465      | IRF1  | cna | hetloss | METABRIC |
| MB-6060      | IRF1  | cna | hetloss | METABRIC |
| MB-6098      | IRF1  | cna | hetloss | METABRIC |
| MB-7038      | IRF1  | cna | hetloss | METABRIC |
| MB-0420      | IRF1  | cna | hetloss | METABRIC |
| PD10014      | IRF1  | cna | hetloss | BASIS    |
| PD13296      | IRF1  | cna | hetloss | BASIS    |
| PD13297      | IRF1  | cna | hetloss | BASIS    |
| PD13771      | IRF1  | cna | gain    | BASIS    |

|                   |      |     |         |            |
|-------------------|------|-----|---------|------------|
| PD22355           | IRF1 | cna | hetloss | BASIS      |
| PD23562           | IRF1 | cna | hetloss | BASIS      |
| PD23578           | IRF1 | cna | hetloss | BASIS      |
| PD24202           | IRF1 | cna | hetloss | BASIS      |
| PD24206           | IRF1 | cna | gain    | BASIS      |
| PD24337           | IRF1 | cna | hetloss | BASIS      |
| PD3890            | IRF1 | cna | hetloss | BASIS      |
| PD3905            | IRF1 | cna | gain    | BASIS      |
| PD4005            | IRF1 | cna | hetloss | BASIS      |
| PD5935            | IRF1 | cna | gain    | BASIS      |
| PD5945            | IRF1 | cna | gain    | BASIS      |
| PD6406            | IRF1 | cna | hetloss | BASIS      |
| PD6413            | IRF1 | cna | hetloss | BASIS      |
| PD7067            | IRF1 | cna | gain    | BASIS      |
| PD8980            | IRF1 | cna | hetloss | BASIS      |
| PD9585            | IRF1 | cna | hetloss | BASIS      |
| TCGA-A2-A25B      | JAK2 | cna | hetloss | TCGA       |
| TCGA-AO-A0JL      | JAK2 | cna | gain    | TCGA       |
| TCGA-BH-A0AW      | JAK2 | cna | hetloss | TCGA       |
| TCGA-BH-A0C0      | JAK2 | cna | hetloss | TCGA       |
| TCGA-BH-A1FU      | JAK2 | cna | hetloss | TCGA       |
| TCGA-C8-A12L      | JAK2 | cna | hetloss | TCGA       |
| TCGA-E2-A1L7      | JAK2 | cna | hetloss | TCGA       |
| MB-0346           | JAK2 | cna | gain    | METABRIC   |
| MB-2827           | JAK2 | cna | hetloss | METABRIC   |
| MB-6060           | JAK2 | cna | gain    | METABRIC   |
| MB-0420           | JAK2 | cna | hetloss | METABRIC   |
| MTS-T0064         | JAK2 | cna | amp     | METABRIC   |
| P-0009557-T01-IM5 | JAK2 | cna | amp     | MSK-IMPACT |
| PD11327           | JAK2 | cna | homdel  | BASIS      |
| PD13296           | JAK2 | cna | gain    | BASIS      |
| PD13297           | JAK2 | cna | hetloss | BASIS      |
| PD13299           | JAK2 | cna | amp     | BASIS      |
| PD22355           | JAK2 | cna | gain    | BASIS      |
| PD23574           | JAK2 | cna | amp     | BASIS      |
| PD24186           | JAK2 | cna | gain    | BASIS      |
| PD24337           | JAK2 | cna | gain    | BASIS      |
| PD3905            | JAK2 | cna | gain    | BASIS      |
| PD4006            | JAK2 | cna | gain    | BASIS      |
| PD4107            | JAK2 | cna | gain    | BASIS      |
| PD4826            | JAK2 | cna | gain    | BASIS      |
| PD4967            | JAK2 | cna | hetloss | BASIS      |
| PD5945            | JAK2 | cna | gain    | BASIS      |
| PD5948            | JAK2 | cna | hetloss | BASIS      |
| PD6406            | JAK2 | cna | homdel  | BASIS      |
| PD6413            | JAK2 | cna | gain    | BASIS      |
| PD6731            | JAK2 | cna | gain    | BASIS      |

|              |       |     |         |          |
|--------------|-------|-----|---------|----------|
| PD7067       | JAK2  | cna | amp     | BASIS    |
| PD7215       | JAK2  | cna | hetloss | BASIS    |
| PD8621       | JAK2  | cna | gain    | BASIS    |
| PD8980       | JAK2  | cna | gain    | BASIS    |
| PD9004       | JAK2  | cna | gain    | BASIS    |
| PD9585       | JAK2  | cna | hetloss | BASIS    |
| PD9702       | JAK2  | cna | gain    | BASIS    |
| TCGA-A2-A25B | KAT6B | cna | hetloss | TCGA     |
| TCGA-AN-A0XU | KAT6B | cna | hetloss | TCGA     |
| TCGA-AO-A0JL | KAT6B | cna | gain    | TCGA     |
| TCGA-BH-A0AW | KAT6B | cna | gain    | TCGA     |
| TCGA-BH-A0C0 | KAT6B | cna | gain    | TCGA     |
| TCGA-C8-A12L | KAT6B | cna | hetloss | TCGA     |
| TCGA-D8-A27M | KAT6B | cna | hetloss | TCGA     |
| TCGA-E2-A1L7 | KAT6B | cna | gain    | TCGA     |
| TCGA-LL-A5YP | KAT6B | cna | hetloss | TCGA     |
| MB-2827      | KAT6B | cna | hetloss | METABRIC |
| MB-5070      | KAT6B | cna | gain    | METABRIC |
| MB-6098      | KAT6B | cna | hetloss | METABRIC |
| MB-7048      | KAT6B | cna | hetloss | METABRIC |
| MTS-T0064    | KAT6B | cna | gain    | METABRIC |
| PD10014      | KAT6B | cna | gain    | BASIS    |
| PD11742      | KAT6B | cna | hetloss | BASIS    |
| PD13296      | KAT6B | cna | hetloss | BASIS    |
| PD13299      | KAT6B | cna | gain    | BASIS    |
| PD23574      | KAT6B | cna | gain    | BASIS    |
| PD24186      | KAT6B | cna | gain    | BASIS    |
| PD24202      | KAT6B | cna | hetloss | BASIS    |
| PD24206      | KAT6B | cna | gain    | BASIS    |
| PD4006       | KAT6B | cna | gain    | BASIS    |
| PD4107       | KAT6B | cna | gain    | BASIS    |
| PD4826       | KAT6B | cna | gain    | BASIS    |
| PD4967       | KAT6B | cna | hetloss | BASIS    |
| PD5930       | KAT6B | cna | gain    | BASIS    |
| PD5935       | KAT6B | cna | gain    | BASIS    |
| PD5945       | KAT6B | cna | hetloss | BASIS    |
| PD6406       | KAT6B | cna | hetloss | BASIS    |
| PD6731       | KAT6B | cna | hetloss | BASIS    |
| PD7067       | KAT6B | cna | gain    | BASIS    |
| PD7215       | KAT6B | cna | gain    | BASIS    |
| PD8621       | KAT6B | cna | gain    | BASIS    |
| PD8980       | KAT6B | cna | hetloss | BASIS    |
| PD9004       | KAT6B | cna | gain    | BASIS    |
| PD9585       | KAT6B | cna | hetloss | BASIS    |
| PD9702       | KAT6B | cna | gain    | BASIS    |
| TCGA-A2-A25B | KDM2B | cna | gain    | TCGA     |
| TCGA-AN-A0XU | KDM2B | cna | hetloss | TCGA     |

|              |       |     |         |          |
|--------------|-------|-----|---------|----------|
| TCGA-AO-A0JL | KDM2B | cna | hetloss | TCGA     |
| TCGA-BH-A0C0 | KDM2B | cna | hetloss | TCGA     |
| TCGA-BH-A18R | KDM2B | cna | gain    | TCGA     |
| TCGA-BH-A1FU | KDM2B | cna | hetloss | TCGA     |
| TCGA-D8-A27M | KDM2B | cna | hetloss | TCGA     |
| TCGA-E2-A1L7 | KDM2B | cna | hetloss | TCGA     |
| TCGA-LL-A5YP | KDM2B | cna | hetloss | TCGA     |
| MB-0346      | KDM2B | cna | gain    | METABRIC |
| MB-2827      | KDM2B | cna | hetloss | METABRIC |
| MB-5070      | KDM2B | cna | hetloss | METABRIC |
| MB-7048      | KDM2B | cna | hetloss | METABRIC |
| MTS-T0064    | KDM2B | cna | gain    | METABRIC |
| PD11327      | KDM2B | cna | homdel  | BASIS    |
| PD13296      | KDM2B | cna | hetloss | BASIS    |
| PD13297      | KDM2B | cna | gain    | BASIS    |
| PD13771      | KDM2B | cna | gain    | BASIS    |
| PD22355      | KDM2B | cna | hetloss | BASIS    |
| PD23574      | KDM2B | cna | gain    | BASIS    |
| PD23578      | KDM2B | cna | hetloss | BASIS    |
| PD24206      | KDM2B | cna | homdel  | BASIS    |
| PD3890       | KDM2B | cna | hetloss | BASIS    |
| PD3905       | KDM2B | cna | gain    | BASIS    |
| PD4005       | KDM2B | cna | hetloss | BASIS    |
| PD4006       | KDM2B | cna | amp     | BASIS    |
| PD4107       | KDM2B | cna | gain    | BASIS    |
| PD4826       | KDM2B | cna | gain    | BASIS    |
| PD4967       | KDM2B | cna | hetloss | BASIS    |
| PD5935       | KDM2B | cna | gain    | BASIS    |
| PD5945       | KDM2B | cna | gain    | BASIS    |
| PD5948       | KDM2B | cna | gain    | BASIS    |
| PD6406       | KDM2B | cna | hetloss | BASIS    |
| PD6731       | KDM2B | cna | hetloss | BASIS    |
| PD7067       | KDM2B | cna | gain    | BASIS    |
| PD9004       | KDM2B | cna | hetloss | BASIS    |
| PD9585       | KDM2B | cna | hetloss | BASIS    |
| PD9702       | KDM2B | cna | gain    | BASIS    |
| TCGA-A2-A25B | KDSR  | cna | hetloss | TCGA     |
| TCGA-AO-A0JL | KDSR  | cna | gain    | TCGA     |
| TCGA-BH-A0AW | KDSR  | cna | hetloss | TCGA     |
| TCGA-BH-A0C0 | KDSR  | cna | gain    | TCGA     |
| TCGA-C8-A12L | KDSR  | cna | gain    | TCGA     |
| TCGA-D8-A27M | KDSR  | cna | hetloss | TCGA     |
| TCGA-E2-A1L7 | KDSR  | cna | gain    | TCGA     |
| TCGA-LL-A5YP | KDSR  | cna | hetloss | TCGA     |
| MB-0346      | KDSR  | cna | hetloss | METABRIC |
| MB-0420      | KDSR  | cna | hetloss | METABRIC |
| MTS-T0064    | KDSR  | cna | hetloss | METABRIC |

|              |       |     |         |          |
|--------------|-------|-----|---------|----------|
| PD10014      | KDSR  | cna | hetloss | BASIS    |
| PD11742      | KDSR  | cna | hetloss | BASIS    |
| PD13296      | KDSR  | cna | hetloss | BASIS    |
| PD13297      | KDSR  | cna | gain    | BASIS    |
| PD13299      | KDSR  | cna | gain    | BASIS    |
| PD22355      | KDSR  | cna | hetloss | BASIS    |
| PD23574      | KDSR  | cna | hetloss | BASIS    |
| PD23578      | KDSR  | cna | hetloss | BASIS    |
| PD24186      | KDSR  | cna | gain    | BASIS    |
| PD24202      | KDSR  | cna | hetloss | BASIS    |
| PD24206      | KDSR  | cna | hetloss | BASIS    |
| PD24337      | KDSR  | cna | gain    | BASIS    |
| PD3905       | KDSR  | cna | gain    | BASIS    |
| PD4006       | KDSR  | cna | gain    | BASIS    |
| PD4107       | KDSR  | cna | gain    | BASIS    |
| PD4826       | KDSR  | cna | hetloss | BASIS    |
| PD4967       | KDSR  | cna | hetloss | BASIS    |
| PD5930       | KDSR  | cna | hetloss | BASIS    |
| PD5945       | KDSR  | cna | gain    | BASIS    |
| PD5948       | KDSR  | cna | gain    | BASIS    |
| PD6406       | KDSR  | cna | gain    | BASIS    |
| PD7067       | KDSR  | cna | gain    | BASIS    |
| PD8621       | KDSR  | cna | hetloss | BASIS    |
| PD8980       | KDSR  | cna | hetloss | BASIS    |
| PD9004       | KDSR  | cna | hetloss | BASIS    |
| PD9585       | KDSR  | cna | hetloss | BASIS    |
| PD9702       | KDSR  | cna | gain    | BASIS    |
| TCGA-A2-A25B | KLHL6 | cna | amp     | TCGA     |
| TCGA-AN-A0XU | KLHL6 | cna | gain    | TCGA     |
| TCGA-BH-A0AW | KLHL6 | cna | gain    | TCGA     |
| TCGA-BH-A0C0 | KLHL6 | cna | gain    | TCGA     |
| TCGA-BH-A1FU | KLHL6 | cna | hetloss | TCGA     |
| TCGA-C8-A12L | KLHL6 | cna | gain    | TCGA     |
| TCGA-E2-A1L7 | KLHL6 | cna | gain    | TCGA     |
| TCGA-LL-A5YP | KLHL6 | cna | gain    | TCGA     |
| MB-0346      | KLHL6 | cna | gain    | METABRIC |
| MB-5070      | KLHL6 | cna | amp     | METABRIC |
| MB-5107      | KLHL6 | cna | amp     | METABRIC |
| MB-6098      | KLHL6 | cna | gain    | METABRIC |
| MB-0420      | KLHL6 | cna | gain    | METABRIC |
| MTS-T0064    | KLHL6 | cna | amp     | METABRIC |
| PD11327      | KLHL6 | cna | homdel  | BASIS    |
| PD13296      | KLHL6 | cna | gain    | BASIS    |
| PD13299      | KLHL6 | cna | gain    | BASIS    |
| PD13771      | KLHL6 | cna | hetloss | BASIS    |
| PD22355      | KLHL6 | cna | gain    | BASIS    |
| PD23561      | KLHL6 | cna | hetloss | BASIS    |

|              |       |     |         |          |
|--------------|-------|-----|---------|----------|
| PD23562      | KLHL6 | cna | gain    | BASIS    |
| PD23578      | KLHL6 | cna | gain    | BASIS    |
| PD24186      | KLHL6 | cna | amp     | BASIS    |
| PD24202      | KLHL6 | cna | gain    | BASIS    |
| PD24206      | KLHL6 | cna | gain    | BASIS    |
| PD3905       | KLHL6 | cna | gain    | BASIS    |
| PD4005       | KLHL6 | cna | gain    | BASIS    |
| PD4107       | KLHL6 | cna | gain    | BASIS    |
| PD5935       | KLHL6 | cna | gain    | BASIS    |
| PD5945       | KLHL6 | cna | amp     | BASIS    |
| PD5948       | KLHL6 | cna | gain    | BASIS    |
| PD6406       | KLHL6 | cna | gain    | BASIS    |
| PD6731       | KLHL6 | cna | gain    | BASIS    |
| PD7067       | KLHL6 | cna | gain    | BASIS    |
| PD7215       | KLHL6 | cna | gain    | BASIS    |
| PD8621       | KLHL6 | cna | gain    | BASIS    |
| PD8980       | KLHL6 | cna | gain    | BASIS    |
| PD9702       | KLHL6 | cna | gain    | BASIS    |
| TCGA-A2-A25B | KMT2A | cna | hetloss | TCGA     |
| TCGA-AN-A0XU | KMT2A | cna | gain    | TCGA     |
| TCGA-AO-A0JL | KMT2A | cna | hetloss | TCGA     |
| TCGA-BH-A0C0 | KMT2A | cna | hetloss | TCGA     |
| TCGA-BH-A18R | KMT2A | cna | homdel  | TCGA     |
| TCGA-D8-A27M | KMT2A | cna | hetloss | TCGA     |
| TCGA-E2-A1L7 | KMT2A | cna | hetloss | TCGA     |
| TCGA-E9-A1NC | KMT2A | cna | hetloss | TCGA     |
| TCGA-EW-A10X | KMT2A | cna | homdel  | TCGA     |
| TCGA-LL-A5YP | KMT2A | cna | hetloss | TCGA     |
| MB-0346      | KMT2A | cna | hetloss | METABRIC |
| MB-5070      | KMT2A | cna | hetloss | METABRIC |
| MB-5107      | KMT2A | cna | hetloss | METABRIC |
| MB-6271      | KMT2A | cna | hetloss | METABRIC |
| MB-7032      | KMT2A | cna | hetloss | METABRIC |
| MB-7048      | KMT2A | cna | hetloss | METABRIC |
| PD11742      | KMT2A | cna | hetloss | BASIS    |
| PD13296      | KMT2A | cna | hetloss | BASIS    |
| PD13297      | KMT2A | cna | hetloss | BASIS    |
| PD13771      | KMT2A | cna | hetloss | BASIS    |
| PD22355      | KMT2A | cna | hetloss | BASIS    |
| PD23574      | KMT2A | cna | gain    | BASIS    |
| PD23578      | KMT2A | cna | hetloss | BASIS    |
| PD24186      | KMT2A | cna | gain    | BASIS    |
| PD24206      | KMT2A | cna | gain    | BASIS    |
| PD24337      | KMT2A | cna | hetloss | BASIS    |
| PD3905       | KMT2A | cna | gain    | BASIS    |
| PD4005       | KMT2A | cna | hetloss | BASIS    |
| PD4826       | KMT2A | cna | hetloss | BASIS    |

|              |       |     |         |          |
|--------------|-------|-----|---------|----------|
| PD5935       | KMT2A | cna | gain    | BASIS    |
| PD5945       | KMT2A | cna | gain    | BASIS    |
| PD5948       | KMT2A | cna | gain    | BASIS    |
| PD6413       | KMT2A | cna | hetloss | BASIS    |
| PD6731       | KMT2A | cna | hetloss | BASIS    |
| PD7067       | KMT2A | cna | gain    | BASIS    |
| PD7215       | KMT2A | cna | gain    | BASIS    |
| PD9004       | KMT2A | cna | hetloss | BASIS    |
| PD9702       | KMT2A | cna | gain    | BASIS    |
| TCGA-AN-A0XU | LATS2 | cna | hetloss | TCGA     |
| TCGA-AO-A0JL | LATS2 | cna | hetloss | TCGA     |
| TCGA-BH-A0AW | LATS2 | cna | hetloss | TCGA     |
| TCGA-BH-A0C0 | LATS2 | cna | hetloss | TCGA     |
| TCGA-BH-A1FU | LATS2 | cna | hetloss | TCGA     |
| TCGA-C8-A12L | LATS2 | cna | hetloss | TCGA     |
| TCGA-D8-A27M | LATS2 | cna | hetloss | TCGA     |
| TCGA-E2-A1L7 | LATS2 | cna | hetloss | TCGA     |
| TCGA-E9-A1NC | LATS2 | cna | hetloss | TCGA     |
| TCGA-EW-A10X | LATS2 | cna | homdel  | TCGA     |
| TCGA-LL-A5YP | LATS2 | cna | gain    | TCGA     |
| MB-0346      | LATS2 | cna | hetloss | METABRIC |
| MB-2827      | LATS2 | cna | hetloss | METABRIC |
| MB-6098      | LATS2 | cna | hetloss | METABRIC |
| MTS-T0064    | LATS2 | cna | hetloss | METABRIC |
| PD10014      | LATS2 | cna | hetloss | BASIS    |
| PD11327      | LATS2 | cna | homdel  | BASIS    |
| PD13296      | LATS2 | cna | hetloss | BASIS    |
| PD13297      | LATS2 | cna | hetloss | BASIS    |
| PD13771      | LATS2 | cna | hetloss | BASIS    |
| PD14442      | LATS2 | cna | hetloss | BASIS    |
| PD22355      | LATS2 | cna | hetloss | BASIS    |
| PD24202      | LATS2 | cna | hetloss | BASIS    |
| PD24206      | LATS2 | cna | gain    | BASIS    |
| PD24337      | LATS2 | cna | hetloss | BASIS    |
| PD3890       | LATS2 | cna | hetloss | BASIS    |
| PD3905       | LATS2 | cna | gain    | BASIS    |
| PD4005       | LATS2 | cna | hetloss | BASIS    |
| PD4006       | LATS2 | cna | gain    | BASIS    |
| PD4107       | LATS2 | cna | gain    | BASIS    |
| PD4826       | LATS2 | cna | hetloss | BASIS    |
| PD4967       | LATS2 | cna | hetloss | BASIS    |
| PD5945       | LATS2 | cna | amp     | BASIS    |
| PD6413       | LATS2 | cna | hetloss | BASIS    |
| PD6731       | LATS2 | cna | hetloss | BASIS    |
| PD7067       | LATS2 | cna | gain    | BASIS    |
| PD8980       | LATS2 | cna | hetloss | BASIS    |
| PD9702       | LATS2 | cna | gain    | BASIS    |



|              |        |     |         |          |
|--------------|--------|-----|---------|----------|
| TCGA-A2-A25B | LIFR   | cna | amp     | TCGA     |
| TCGA-AN-A0XU | LIFR   | cna | gain    | TCGA     |
| TCGA-AO-A0JL | LIFR   | cna | gain    | TCGA     |
| TCGA-BH-A0AW | LIFR   | cna | gain    | TCGA     |
| TCGA-BH-A0C0 | LIFR   | cna | gain    | TCGA     |
| TCGA-BH-A1FU | LIFR   | cna | amp     | TCGA     |
| TCGA-E9-A1NC | LIFR   | cna | hetloss | TCGA     |
| TCGA-LL-A5YP | LIFR   | cna | amp     | TCGA     |
| MB-0346      | LIFR   | cna | gain    | METABRIC |
| MB-5070      | LIFR   | cna | gain    | METABRIC |
| MB-6060      | LIFR   | cna | gain    | METABRIC |
| MB-6098      | LIFR   | cna | amp     | METABRIC |
| MB-0420      | LIFR   | cna | gain    | METABRIC |
| PD10014      | LIFR   | cna | hetloss | BASIS    |
| PD11327      | LIFR   | cna | gain    | BASIS    |
| PD13299      | LIFR   | cna | gain    | BASIS    |
| PD23562      | LIFR   | cna | gain    | BASIS    |
| PD23574      | LIFR   | cna | gain    | BASIS    |
| PD24186      | LIFR   | cna | gain    | BASIS    |
| PD24206      | LIFR   | cna | gain    | BASIS    |
| PD24337      | LIFR   | cna | hetloss | BASIS    |
| PD3890       | LIFR   | cna | gain    | BASIS    |
| PD3905       | LIFR   | cna | gain    | BASIS    |
| PD4005       | LIFR   | cna | hetloss | BASIS    |
| PD4006       | LIFR   | cna | gain    | BASIS    |
| PD4107       | LIFR   | cna | gain    | BASIS    |
| PD4826       | LIFR   | cna | gain    | BASIS    |
| PD5930       | LIFR   | cna | gain    | BASIS    |
| PD5935       | LIFR   | cna | hetloss | BASIS    |
| PD5945       | LIFR   | cna | amp     | BASIS    |
| PD5948       | LIFR   | cna | gain    | BASIS    |
| PD6406       | LIFR   | cna | hetloss | BASIS    |
| PD6413       | LIFR   | cna | gain    | BASIS    |
| PD6731       | LIFR   | cna | gain    | BASIS    |
| PD7215       | LIFR   | cna | amp     | BASIS    |
| PD8980       | LIFR   | cna | gain    | BASIS    |
| PD9004       | LIFR   | cna | gain    | BASIS    |
| PD9585       | LIFR   | cna | gain    | BASIS    |
| TCGA-A2-A25B | MAGEE1 | cna | gain    | TCGA     |
| TCGA-AN-A0XU | MAGEE1 | cna | hetloss | TCGA     |
| TCGA-AO-A0JL | MAGEE1 | cna | gain    | TCGA     |
| TCGA-BH-A0AW | MAGEE1 | cna | gain    | TCGA     |
| TCGA-C8-A12L | MAGEE1 | cna | hetloss | TCGA     |
| TCGA-E2-A1L7 | MAGEE1 | cna | hetloss | TCGA     |
| TCGA-E9-A1NC | MAGEE1 | cna | hetloss | TCGA     |
| MB-0346      | MAGEE1 | cna | hetloss | METABRIC |
| MB-2827      | MAGEE1 | cna | hetloss | METABRIC |

|              |        |     |         |          |
|--------------|--------|-----|---------|----------|
| MB-5465      | MAGEE1 | cna | gain    | METABRIC |
| MB-6060      | MAGEE1 | cna | hetloss | METABRIC |
| MB-0420      | MAGEE1 | cna | hetloss | METABRIC |
| PD10014      | MAGEE1 | cna | hetloss | BASIS    |
| PD11327      | MAGEE1 | cna | hetloss | BASIS    |
| PD13296      | MAGEE1 | cna | amp     | BASIS    |
| PD13299      | MAGEE1 | cna | gain    | BASIS    |
| PD13771      | MAGEE1 | cna | gain    | BASIS    |
| PD14442      | MAGEE1 | cna | gain    | BASIS    |
| PD23562      | MAGEE1 | cna | hetloss | BASIS    |
| PD23574      | MAGEE1 | cna | gain    | BASIS    |
| PD24186      | MAGEE1 | cna | gain    | BASIS    |
| PD24206      | MAGEE1 | cna | gain    | BASIS    |
| PD3905       | MAGEE1 | cna | gain    | BASIS    |
| PD4005       | MAGEE1 | cna | hetloss | BASIS    |
| PD4006       | MAGEE1 | cna | gain    | BASIS    |
| PD4107       | MAGEE1 | cna | gain    | BASIS    |
| PD4826       | MAGEE1 | cna | gain    | BASIS    |
| PD4967       | MAGEE1 | cna | gain    | BASIS    |
| PD5930       | MAGEE1 | cna | gain    | BASIS    |
| PD5935       | MAGEE1 | cna | gain    | BASIS    |
| PD5948       | MAGEE1 | cna | gain    | BASIS    |
| PD6406       | MAGEE1 | cna | gain    | BASIS    |
| PD6413       | MAGEE1 | cna | gain    | BASIS    |
| PD7067       | MAGEE1 | cna | gain    | BASIS    |
| PD7215       | MAGEE1 | cna | gain    | BASIS    |
| PD8621       | MAGEE1 | cna | gain    | BASIS    |
| PD8980       | MAGEE1 | cna | gain    | BASIS    |
| PD9004       | MAGEE1 | cna | gain    | BASIS    |
| TCGA-A2-A25B | MAML2  | cna | hetloss | TCGA     |
| TCGA-AN-A0XU | MAML2  | cna | gain    | TCGA     |
| TCGA-AO-A0JL | MAML2  | cna | hetloss | TCGA     |
| TCGA-D8-A27M | MAML2  | cna | amp     | TCGA     |
| TCGA-EW-A10X | MAML2  | cna | homdel  | TCGA     |
| TCGA-LL-A5YP | MAML2  | cna | hetloss | TCGA     |
| MB-0346      | MAML2  | cna | hetloss | METABRIC |
| MB-5070      | MAML2  | cna | hetloss | METABRIC |
| MB-6271      | MAML2  | cna | hetloss | METABRIC |
| MB-7032      | MAML2  | cna | hetloss | METABRIC |
| MB-7048      | MAML2  | cna | hetloss | METABRIC |
| MB-0420      | MAML2  | cna | hetloss | METABRIC |
| MTS-T0064    | MAML2  | cna | gain    | METABRIC |
| PD10014      | MAML2  | cna | gain    | BASIS    |
| PD11327      | MAML2  | cna | gain    | BASIS    |
| PD11742      | MAML2  | cna | hetloss | BASIS    |
| PD13296      | MAML2  | cna | hetloss | BASIS    |
| PD13299      | MAML2  | cna | gain    | BASIS    |

|                   |         |     |         |            |
|-------------------|---------|-----|---------|------------|
| PD13771           | MAML2   | cna | hetloss | BASIS      |
| PD22355           | MAML2   | cna | hetloss | BASIS      |
| PD23574           | MAML2   | cna | gain    | BASIS      |
| PD23578           | MAML2   | cna | hetloss | BASIS      |
| PD24186           | MAML2   | cna | gain    | BASIS      |
| PD24206           | MAML2   | cna | gain    | BASIS      |
| PD24337           | MAML2   | cna | hetloss | BASIS      |
| PD3890            | MAML2   | cna | hetloss | BASIS      |
| PD3905            | MAML2   | cna | gain    | BASIS      |
| PD4006            | MAML2   | cna | hetloss | BASIS      |
| PD4826            | MAML2   | cna | hetloss | BASIS      |
| PD5935            | MAML2   | cna | gain    | BASIS      |
| PD5945            | MAML2   | cna | gain    | BASIS      |
| PD5948            | MAML2   | cna | gain    | BASIS      |
| PD6413            | MAML2   | cna | hetloss | BASIS      |
| PD7067            | MAML2   | cna | amp     | BASIS      |
| PD7215            | MAML2   | cna | gain    | BASIS      |
| PD8980            | MAML2   | cna | gain    | BASIS      |
| PD9585            | MAML2   | cna | gain    | BASIS      |
| PD9702            | MAML2   | cna | amp     | BASIS      |
| TCGA-A2-A25B      | MAP3K13 | cna | amp     | TCGA       |
| TCGA-AN-A0XU      | MAP3K13 | cna | gain    | TCGA       |
| TCGA-BH-A0AW      | MAP3K13 | cna | gain    | TCGA       |
| TCGA-BH-A0C0      | MAP3K13 | cna | gain    | TCGA       |
| TCGA-BH-A1FU      | MAP3K13 | cna | hetloss | TCGA       |
| TCGA-C8-A12L      | MAP3K13 | cna | gain    | TCGA       |
| TCGA-LL-A5YP      | MAP3K13 | cna | gain    | TCGA       |
| MB-0346           | MAP3K13 | cna | gain    | METABRIC   |
| MB-5070           | MAP3K13 | cna | hetloss | METABRIC   |
| MB-5107           | MAP3K13 | cna | amp     | METABRIC   |
| MB-6098           | MAP3K13 | cna | gain    | METABRIC   |
| MB-7038           | MAP3K13 | cna | hetloss | METABRIC   |
| MB-0420           | MAP3K13 | cna | gain    | METABRIC   |
| P-0002858-T01-IM3 | MAP3K13 | cna | amp     | MSK-IMPACT |
| PD11327           | MAP3K13 | cna | homdel  | BASIS      |
| PD13299           | MAP3K13 | cna | gain    | BASIS      |
| PD13771           | MAP3K13 | cna | hetloss | BASIS      |
| PD22355           | MAP3K13 | cna | gain    | BASIS      |
| PD23561           | MAP3K13 | cna | hetloss | BASIS      |
| PD23562           | MAP3K13 | cna | gain    | BASIS      |
| PD23578           | MAP3K13 | cna | gain    | BASIS      |
| PD24186           | MAP3K13 | cna | amp     | BASIS      |
| PD24202           | MAP3K13 | cna | gain    | BASIS      |
| PD24206           | MAP3K13 | cna | homdel  | BASIS      |
| PD3905            | MAP3K13 | cna | gain    | BASIS      |
| PD4005            | MAP3K13 | cna | gain    | BASIS      |
| PD4107            | MAP3K13 | cna | gain    | BASIS      |

|              |         |     |         |          |
|--------------|---------|-----|---------|----------|
| PD4826       | MAP3K13 | cna | gain    | BASIS    |
| PD5945       | MAP3K13 | cna | amp     | BASIS    |
| PD5948       | MAP3K13 | cna | gain    | BASIS    |
| PD6406       | MAP3K13 | cna | gain    | BASIS    |
| PD6731       | MAP3K13 | cna | gain    | BASIS    |
| PD7067       | MAP3K13 | cna | gain    | BASIS    |
| PD7215       | MAP3K13 | cna | gain    | BASIS    |
| PD8621       | MAP3K13 | cna | gain    | BASIS    |
| PD8980       | MAP3K13 | cna | gain    | BASIS    |
| PD9004       | MAP3K13 | cna | gain    | BASIS    |
| PD9702       | MAP3K13 | cna | gain    | BASIS    |
| TCGA-A2-A25B | MAP3K6  | cna | hetloss | TCGA     |
| TCGA-AN-A0XU | MAP3K6  | cna | hetloss | TCGA     |
| TCGA-AO-A0JL | MAP3K6  | cna | hetloss | TCGA     |
| TCGA-BH-A0AW | MAP3K6  | cna | gain    | TCGA     |
| TCGA-BH-A0C0 | MAP3K6  | cna | hetloss | TCGA     |
| TCGA-BH-A18R | MAP3K6  | cna | homdel  | TCGA     |
| TCGA-BH-A1FU | MAP3K6  | cna | gain    | TCGA     |
| TCGA-C8-A12L | MAP3K6  | cna | hetloss | TCGA     |
| TCGA-D8-A27M | MAP3K6  | cna | gain    | TCGA     |
| TCGA-E2-A1L7 | MAP3K6  | cna | hetloss | TCGA     |
| TCGA-EW-A10X | MAP3K6  | cna | homdel  | TCGA     |
| TCGA-LL-A5YP | MAP3K6  | cna | gain    | TCGA     |
| MB-0346      | MAP3K6  | cna | hetloss | METABRIC |
| MB-2827      | MAP3K6  | cna | hetloss | METABRIC |
| MB-5070      | MAP3K6  | cna | hetloss | METABRIC |
| MB-5465      | MAP3K6  | cna | hetloss | METABRIC |
| MB-6060      | MAP3K6  | cna | hetloss | METABRIC |
| MB-6098      | MAP3K6  | cna | hetloss | METABRIC |
| PD10014      | MAP3K6  | cna | gain    | BASIS    |
| PD11327      | MAP3K6  | cna | hetloss | BASIS    |
| PD11742      | MAP3K6  | cna | hetloss | BASIS    |
| PD13296      | MAP3K6  | cna | hetloss | BASIS    |
| PD13771      | MAP3K6  | cna | hetloss | BASIS    |
| PD22355      | MAP3K6  | cna | hetloss | BASIS    |
| PD24186      | MAP3K6  | cna | gain    | BASIS    |
| PD24206      | MAP3K6  | cna | hetloss | BASIS    |
| PD24337      | MAP3K6  | cna | hetloss | BASIS    |
| PD3890       | MAP3K6  | cna | hetloss | BASIS    |
| PD3905       | MAP3K6  | cna | gain    | BASIS    |
| PD4006       | MAP3K6  | cna | gain    | BASIS    |
| PD4826       | MAP3K6  | cna | gain    | BASIS    |
| PD5945       | MAP3K6  | cna | amp     | BASIS    |
| PD5948       | MAP3K6  | cna | gain    | BASIS    |
| PD7067       | MAP3K6  | cna | gain    | BASIS    |
| PD7215       | MAP3K6  | cna | gain    | BASIS    |
| PD9004       | MAP3K6  | cna | hetloss | BASIS    |

|              |        |     |         |          |
|--------------|--------|-----|---------|----------|
| PD9585       | MAP3K6 | cna | hetloss | BASIS    |
| PD9702       | MAP3K6 | cna | gain    | BASIS    |
| TCGA-A2-A25B | MSI1   | cna | gain    | TCGA     |
| TCGA-AN-A0XU | MSI1   | cna | hetloss | TCGA     |
| TCGA-AO-A0JL | MSI1   | cna | hetloss | TCGA     |
| TCGA-BH-A0C0 | MSI1   | cna | hetloss | TCGA     |
| TCGA-BH-A18R | MSI1   | cna | gain    | TCGA     |
| TCGA-BH-A1FU | MSI1   | cna | hetloss | TCGA     |
| TCGA-D8-A27M | MSI1   | cna | hetloss | TCGA     |
| TCGA-E2-A1L7 | MSI1   | cna | hetloss | TCGA     |
| TCGA-LL-A5YP | MSI1   | cna | hetloss | TCGA     |
| MB-0346      | MSI1   | cna | gain    | METABRIC |
| MB-2827      | MSI1   | cna | hetloss | METABRIC |
| MB-5070      | MSI1   | cna | hetloss | METABRIC |
| MB-7048      | MSI1   | cna | hetloss | METABRIC |
| MTS-T0064    | MSI1   | cna | gain    | METABRIC |
| PD11327      | MSI1   | cna | homdel  | BASIS    |
| PD13296      | MSI1   | cna | hetloss | BASIS    |
| PD13297      | MSI1   | cna | gain    | BASIS    |
| PD13771      | MSI1   | cna | gain    | BASIS    |
| PD22355      | MSI1   | cna | hetloss | BASIS    |
| PD23574      | MSI1   | cna | gain    | BASIS    |
| PD23578      | MSI1   | cna | hetloss | BASIS    |
| PD24206      | MSI1   | cna | homdel  | BASIS    |
| PD3890       | MSI1   | cna | hetloss | BASIS    |
| PD3905       | MSI1   | cna | gain    | BASIS    |
| PD4005       | MSI1   | cna | hetloss | BASIS    |
| PD4006       | MSI1   | cna | amp     | BASIS    |
| PD4107       | MSI1   | cna | gain    | BASIS    |
| PD4826       | MSI1   | cna | gain    | BASIS    |
| PD4967       | MSI1   | cna | hetloss | BASIS    |
| PD5935       | MSI1   | cna | gain    | BASIS    |
| PD5945       | MSI1   | cna | gain    | BASIS    |
| PD5948       | MSI1   | cna | gain    | BASIS    |
| PD6406       | MSI1   | cna | hetloss | BASIS    |
| PD6731       | MSI1   | cna | hetloss | BASIS    |
| PD7067       | MSI1   | cna | gain    | BASIS    |
| PD9004       | MSI1   | cna | hetloss | BASIS    |
| PD9585       | MSI1   | cna | hetloss | BASIS    |
| PD9702       | MSI1   | cna | gain    | BASIS    |
| TCGA-A2-A25B | NTRK3  | cna | gain    | TCGA     |
| TCGA-AN-A0XU | NTRK3  | cna | gain    | TCGA     |
| TCGA-AO-A0JL | NTRK3  | cna | hetloss | TCGA     |
| TCGA-BH-A0AW | NTRK3  | cna | hetloss | TCGA     |
| TCGA-BH-A0C0 | NTRK3  | cna | hetloss | TCGA     |
| TCGA-D8-A27M | NTRK3  | cna | hetloss | TCGA     |
| TCGA-E2-A1L7 | NTRK3  | cna | gain    | TCGA     |

|              |       |     |         |          |
|--------------|-------|-----|---------|----------|
| TCGA-LL-A5YP | NTRK3 | cna | gain    | TCGA     |
| MB-0346      | NTRK3 | cna | hetloss | METABRIC |
| MB-5070      | NTRK3 | cna | gain    | METABRIC |
| MB-5465      | NTRK3 | cna | hetloss | METABRIC |
| MB-7038      | NTRK3 | cna | gain    | METABRIC |
| MB-7048      | NTRK3 | cna | gain    | METABRIC |
| MB-0420      | NTRK3 | cna | gain    | METABRIC |
| MTS-T0064    | NTRK3 | cna | amp     | METABRIC |
| PD11327      | NTRK3 | cna | gain    | BASIS    |
| PD11742      | NTRK3 | cna | hetloss | BASIS    |
| PD13296      | NTRK3 | cna | gain    | BASIS    |
| PD13297      | NTRK3 | cna | hetloss | BASIS    |
| PD13299      | NTRK3 | cna | gain    | BASIS    |
| PD23562      | NTRK3 | cna | gain    | BASIS    |
| PD23574      | NTRK3 | cna | gain    | BASIS    |
| PD23578      | NTRK3 | cna | gain    | BASIS    |
| PD24202      | NTRK3 | cna | hetloss | BASIS    |
| PD24206      | NTRK3 | cna | gain    | BASIS    |
| PD24337      | NTRK3 | cna | gain    | BASIS    |
| PD3890       | NTRK3 | cna | hetloss | BASIS    |
| PD3905       | NTRK3 | cna | gain    | BASIS    |
| PD4006       | NTRK3 | cna | gain    | BASIS    |
| PD4107       | NTRK3 | cna | gain    | BASIS    |
| PD5930       | NTRK3 | cna | gain    | BASIS    |
| PD5945       | NTRK3 | cna | gain    | BASIS    |
| PD6413       | NTRK3 | cna | hetloss | BASIS    |
| PD7067       | NTRK3 | cna | gain    | BASIS    |
| PD8621       | NTRK3 | cna | gain    | BASIS    |
| PD8980       | NTRK3 | cna | gain    | BASIS    |
| PD9585       | NTRK3 | cna | hetloss | BASIS    |
| PD9702       | NTRK3 | cna | gain    | BASIS    |
| TCGA-A2-A25B | NUP98 | cna | hetloss | TCGA     |
| TCGA-AN-A0XU | NUP98 | cna | hetloss | TCGA     |
| TCGA-AO-A0JL | NUP98 | cna | hetloss | TCGA     |
| TCGA-BH-A0C0 | NUP98 | cna | hetloss | TCGA     |
| TCGA-C8-A12L | NUP98 | cna | hetloss | TCGA     |
| TCGA-E2-A1L7 | NUP98 | cna | homdel  | TCGA     |
| TCGA-LL-A5YP | NUP98 | cna | hetloss | TCGA     |
| MB-0346      | NUP98 | cna | hetloss | METABRIC |
| MB-5070      | NUP98 | cna | hetloss | METABRIC |
| MB-6060      | NUP98 | cna | hetloss | METABRIC |
| MB-6098      | NUP98 | cna | hetloss | METABRIC |
| MB-6271      | NUP98 | cna | gain    | METABRIC |
| MB-7032      | NUP98 | cna | hetloss | METABRIC |
| MB-7048      | NUP98 | cna | hetloss | METABRIC |
| MB-0420      | NUP98 | cna | hetloss | METABRIC |
| PD10014      | NUP98 | cna | hetloss | BASIS    |

|                   |       |     |         |            |
|-------------------|-------|-----|---------|------------|
| PD11327           | NUP98 | cna | homdel  | BASIS      |
| PD11742           | NUP98 | cna | hetloss | BASIS      |
| PD13296           | NUP98 | cna | hetloss | BASIS      |
| PD13297           | NUP98 | cna | hetloss | BASIS      |
| PD22355           | NUP98 | cna | hetloss | BASIS      |
| PD24202           | NUP98 | cna | hetloss | BASIS      |
| PD24206           | NUP98 | cna | gain    | BASIS      |
| PD3890            | NUP98 | cna | hetloss | BASIS      |
| PD3905            | NUP98 | cna | gain    | BASIS      |
| PD4005            | NUP98 | cna | hetloss | BASIS      |
| PD4006            | NUP98 | cna | gain    | BASIS      |
| PD4107            | NUP98 | cna | gain    | BASIS      |
| PD4826            | NUP98 | cna | gain    | BASIS      |
| PD5935            | NUP98 | cna | gain    | BASIS      |
| PD5945            | NUP98 | cna | gain    | BASIS      |
| PD6406            | NUP98 | cna | hetloss | BASIS      |
| PD6413            | NUP98 | cna | hetloss | BASIS      |
| PD6731            | NUP98 | cna | hetloss | BASIS      |
| PD8621            | NUP98 | cna | hetloss | BASIS      |
| PD8980            | NUP98 | cna | hetloss | BASIS      |
| PD9004            | NUP98 | cna | hetloss | BASIS      |
| PD9585            | NUP98 | cna | hetloss | BASIS      |
| TCGA-A2-A25B      | PAK1  | cna | hetloss | TCGA       |
| TCGA-AN-A0XU      | PAK1  | cna | gain    | TCGA       |
| TCGA-AO-A0JL      | PAK1  | cna | hetloss | TCGA       |
| TCGA-BH-A18R      | PAK1  | cna | amp     | TCGA       |
| TCGA-C8-A12L      | PAK1  | cna | gain    | TCGA       |
| TCGA-D8-A27M      | PAK1  | cna | gain    | TCGA       |
| TCGA-EW-A10X      | PAK1  | cna | homdel  | TCGA       |
| TCGA-LL-A5YP      | PAK1  | cna | hetloss | TCGA       |
| MB-0346           | PAK1  | cna | gain    | METABRIC   |
| MB-5107           | PAK1  | cna | amp     | METABRIC   |
| MB-6060           | PAK1  | cna | gain    | METABRIC   |
| MB-6271           | PAK1  | cna | gain    | METABRIC   |
| MB-7032           | PAK1  | cna | gain    | METABRIC   |
| MTS-T0064         | PAK1  | cna | gain    | METABRIC   |
| P-0002591-T01-IM3 | PAK1  | cna | amp     | MSK-IMPACT |
| PD10014           | PAK1  | cna | gain    | BASIS      |
| PD11327           | PAK1  | cna | gain    | BASIS      |
| PD13771           | PAK1  | cna | hetloss | BASIS      |
| PD22355           | PAK1  | cna | hetloss | BASIS      |
| PD23574           | PAK1  | cna | gain    | BASIS      |
| PD24186           | PAK1  | cna | amp     | BASIS      |
| PD24206           | PAK1  | cna | gain    | BASIS      |
| PD3905            | PAK1  | cna | gain    | BASIS      |
| PD4005            | PAK1  | cna | gain    | BASIS      |
| PD4006            | PAK1  | cna | amp     | BASIS      |

|              |      |     |         |          |
|--------------|------|-----|---------|----------|
| PD4107       | PAK1 | cna | gain    | BASIS    |
| PD4826       | PAK1 | cna | gain    | BASIS    |
| PD5930       | PAK1 | cna | gain    | BASIS    |
| PD5935       | PAK1 | cna | gain    | BASIS    |
| PD5945       | PAK1 | cna | amp     | BASIS    |
| PD5948       | PAK1 | cna | gain    | BASIS    |
| PD6413       | PAK1 | cna | gain    | BASIS    |
| PD7067       | PAK1 | cna | gain    | BASIS    |
| PD7215       | PAK1 | cna | gain    | BASIS    |
| PD8980       | PAK1 | cna | gain    | BASIS    |
| PD9004       | PAK1 | cna | gain    | BASIS    |
| PD9585       | PAK1 | cna | hetloss | BASIS    |
| PD9702       | PAK1 | cna | gain    | BASIS    |
| TCGA-A2-A25B | PCM1 | cna | hetloss | TCGA     |
| TCGA-AN-A0XU | PCM1 | cna | hetloss | TCGA     |
| TCGA-AO-A0JL | PCM1 | cna | hetloss | TCGA     |
| TCGA-BH-A0C0 | PCM1 | cna | hetloss | TCGA     |
| TCGA-BH-A1FU | PCM1 | cna | homdel  | TCGA     |
| TCGA-C8-A12L | PCM1 | cna | gain    | TCGA     |
| TCGA-D8-A27M | PCM1 | cna | hetloss | TCGA     |
| TCGA-E2-A1L7 | PCM1 | cna | hetloss | TCGA     |
| TCGA-E9-A1NC | PCM1 | cna | hetloss | TCGA     |
| TCGA-LL-A5YP | PCM1 | cna | hetloss | TCGA     |
| MB-0346      | PCM1 | cna | gain    | METABRIC |
| MB-2827      | PCM1 | cna | hetloss | METABRIC |
| MB-5070      | PCM1 | cna | hetloss | METABRIC |
| MB-5465      | PCM1 | cna | hetloss | METABRIC |
| MB-6060      | PCM1 | cna | hetloss | METABRIC |
| MB-6098      | PCM1 | cna | hetloss | METABRIC |
| MB-7038      | PCM1 | cna | amp     | METABRIC |
| MB-0420      | PCM1 | cna | hetloss | METABRIC |
| MTS-T0064    | PCM1 | cna | hetloss | METABRIC |
| PD10014      | PCM1 | cna | hetloss | BASIS    |
| PD13296      | PCM1 | cna | hetloss | BASIS    |
| PD13299      | PCM1 | cna | hetloss | BASIS    |
| PD13771      | PCM1 | cna | hetloss | BASIS    |
| PD14442      | PCM1 | cna | hetloss | BASIS    |
| PD22355      | PCM1 | cna | hetloss | BASIS    |
| PD23562      | PCM1 | cna | hetloss | BASIS    |
| PD23578      | PCM1 | cna | hetloss | BASIS    |
| PD24186      | PCM1 | cna | gain    | BASIS    |
| PD24202      | PCM1 | cna | hetloss | BASIS    |
| PD24337      | PCM1 | cna | hetloss | BASIS    |
| PD3905       | PCM1 | cna | gain    | BASIS    |
| PD4005       | PCM1 | cna | hetloss | BASIS    |
| PD4006       | PCM1 | cna | gain    | BASIS    |
| PD4826       | PCM1 | cna | hetloss | BASIS    |



|              |      |     |         |          |
|--------------|------|-----|---------|----------|
| PD6406       | PCM1 | cna | hetloss | BASIS    |
| PD7067       | PCM1 | cna | hetloss | BASIS    |
| PD8980       | PCM1 | cna | homdel  | BASIS    |
| PD9004       | PCM1 | cna | gain    | BASIS    |
| TCGA-AN-A0XU | PHF6 | cna | hetloss | TCGA     |
| TCGA-BH-A0AW | PHF6 | cna | gain    | TCGA     |
| TCGA-C8-A12L | PHF6 | cna | gain    | TCGA     |
| TCGA-E2-A1L7 | PHF6 | cna | hetloss | TCGA     |
| TCGA-E9-A1NC | PHF6 | cna | hetloss | TCGA     |
| TCGA-LL-A5YP | PHF6 | cna | gain    | TCGA     |
| MB-0346      | PHF6 | cna | hetloss | METABRIC |
| MB-2827      | PHF6 | cna | hetloss | METABRIC |
| MB-5465      | PHF6 | cna | hetloss | METABRIC |
| MB-6060      | PHF6 | cna | gain    | METABRIC |
| MB-6098      | PHF6 | cna | hetloss | METABRIC |
| MB-7038      | PHF6 | cna | gain    | METABRIC |
| PD10014      | PHF6 | cna | hetloss | BASIS    |
| PD13296      | PHF6 | cna | amp     | BASIS    |
| PD13299      | PHF6 | cna | amp     | BASIS    |
| PD13771      | PHF6 | cna | gain    | BASIS    |
| PD14442      | PHF6 | cna | gain    | BASIS    |
| PD23562      | PHF6 | cna | hetloss | BASIS    |
| PD23574      | PHF6 | cna | gain    | BASIS    |
| PD23578      | PHF6 | cna | hetloss | BASIS    |
| PD24202      | PHF6 | cna | hetloss | BASIS    |
| PD24206      | PHF6 | cna | gain    | BASIS    |
| PD3890       | PHF6 | cna | hetloss | BASIS    |
| PD3905       | PHF6 | cna | gain    | BASIS    |
| PD4006       | PHF6 | cna | gain    | BASIS    |
| PD4107       | PHF6 | cna | gain    | BASIS    |
| PD4826       | PHF6 | cna | gain    | BASIS    |
| PD4967       | PHF6 | cna | gain    | BASIS    |
| PD5930       | PHF6 | cna | gain    | BASIS    |
| PD5935       | PHF6 | cna | gain    | BASIS    |
| PD5945       | PHF6 | cna | gain    | BASIS    |
| PD5948       | PHF6 | cna | gain    | BASIS    |
| PD6406       | PHF6 | cna | gain    | BASIS    |
| PD6413       | PHF6 | cna | gain    | BASIS    |
| PD7215       | PHF6 | cna | gain    | BASIS    |
| PD8621       | PHF6 | cna | amp     | BASIS    |
| PD8980       | PHF6 | cna | hetloss | BASIS    |
| PD9004       | PHF6 | cna | gain    | BASIS    |
| TCGA-A2-A25B | POT1 | cna | gain    | TCGA     |
| TCGA-AO-A0JL | POT1 | cna | gain    | TCGA     |
| TCGA-BH-A0AW | POT1 | cna | gain    | TCGA     |
| TCGA-C8-A12L | POT1 | cna | hetloss | TCGA     |
| TCGA-D8-A27M | POT1 | cna | gain    | TCGA     |

|              |       |     |         |          |
|--------------|-------|-----|---------|----------|
| TCGA-E2-A1L7 | POT1  | cna | hetloss | TCGA     |
| TCGA-E9-A1NC | POT1  | cna | gain    | TCGA     |
| TCGA-LL-A5YP | POT1  | cna | gain    | TCGA     |
| MB-0346      | POT1  | cna | hetloss | METABRIC |
| MB-5070      | POT1  | cna | hetloss | METABRIC |
| MB-5465      | POT1  | cna | gain    | METABRIC |
| MB-7038      | POT1  | cna | gain    | METABRIC |
| MB-7048      | POT1  | cna | gain    | METABRIC |
| MTS-T0064    | POT1  | cna | hetloss | METABRIC |
| PD11327      | POT1  | cna | gain    | BASIS    |
| PD13296      | POT1  | cna | hetloss | BASIS    |
| PD13297      | POT1  | cna | gain    | BASIS    |
| PD13299      | POT1  | cna | gain    | BASIS    |
| PD22355      | POT1  | cna | hetloss | BASIS    |
| PD23574      | POT1  | cna | gain    | BASIS    |
| PD23578      | POT1  | cna | gain    | BASIS    |
| PD24186      | POT1  | cna | amp     | BASIS    |
| PD24337      | POT1  | cna | hetloss | BASIS    |
| PD3890       | POT1  | cna | hetloss | BASIS    |
| PD3905       | POT1  | cna | gain    | BASIS    |
| PD4107       | POT1  | cna | gain    | BASIS    |
| PD4826       | POT1  | cna | gain    | BASIS    |
| PD5930       | POT1  | cna | gain    | BASIS    |
| PD5935       | POT1  | cna | gain    | BASIS    |
| PD5945       | POT1  | cna | amp     | BASIS    |
| PD5948       | POT1  | cna | gain    | BASIS    |
| PD6406       | POT1  | cna | gain    | BASIS    |
| PD7067       | POT1  | cna | gain    | BASIS    |
| PD7215       | POT1  | cna | gain    | BASIS    |
| PD8621       | POT1  | cna | gain    | BASIS    |
| PD9004       | POT1  | cna | gain    | BASIS    |
| PD9585       | POT1  | cna | gain    | BASIS    |
| PD9702       | POT1  | cna | amp     | BASIS    |
| TCGA-A2-A25B | PSIP1 | cna | hetloss | TCGA     |
| TCGA-AO-A0JL | PSIP1 | cna | gain    | TCGA     |
| TCGA-BH-A0AW | PSIP1 | cna | hetloss | TCGA     |
| TCGA-BH-A1FU | PSIP1 | cna | hetloss | TCGA     |
| TCGA-C8-A12L | PSIP1 | cna | hetloss | TCGA     |
| TCGA-E2-A1L7 | PSIP1 | cna | hetloss | TCGA     |
| TCGA-E9-A1NC | PSIP1 | cna | amp     | TCGA     |
| MB-0346      | PSIP1 | cna | hetloss | METABRIC |
| MB-5070      | PSIP1 | cna | hetloss | METABRIC |
| MB-6098      | PSIP1 | cna | hetloss | METABRIC |
| MB-0420      | PSIP1 | cna | hetloss | METABRIC |
| MTS-T0064    | PSIP1 | cna | amp     | METABRIC |
| PD11327      | PSIP1 | cna | homdel  | BASIS    |
| PD13296      | PSIP1 | cna | gain    | BASIS    |

|              |       |     |         |          |
|--------------|-------|-----|---------|----------|
| PD13297      | PSIP1 | cna | hetloss | BASIS    |
| PD13299      | PSIP1 | cna | amp     | BASIS    |
| PD22355      | PSIP1 | cna | gain    | BASIS    |
| PD23574      | PSIP1 | cna | amp     | BASIS    |
| PD24186      | PSIP1 | cna | gain    | BASIS    |
| PD24202      | PSIP1 | cna | hetloss | BASIS    |
| PD24337      | PSIP1 | cna | hetloss | BASIS    |
| PD3905       | PSIP1 | cna | gain    | BASIS    |
| PD4005       | PSIP1 | cna | hetloss | BASIS    |
| PD4006       | PSIP1 | cna | gain    | BASIS    |
| PD4107       | PSIP1 | cna | gain    | BASIS    |
| PD4826       | PSIP1 | cna | gain    | BASIS    |
| PD4967       | PSIP1 | cna | hetloss | BASIS    |
| PD5945       | PSIP1 | cna | amp     | BASIS    |
| PD5948       | PSIP1 | cna | hetloss | BASIS    |
| PD6406       | PSIP1 | cna | homdel  | BASIS    |
| PD6413       | PSIP1 | cna | gain    | BASIS    |
| PD7067       | PSIP1 | cna | amp     | BASIS    |
| PD7215       | PSIP1 | cna | hetloss | BASIS    |
| PD8621       | PSIP1 | cna | gain    | BASIS    |
| PD8980       | PSIP1 | cna | hetloss | BASIS    |
| PD9004       | PSIP1 | cna | gain    | BASIS    |
| PD9585       | PSIP1 | cna | hetloss | BASIS    |
| PD9702       | PSIP1 | cna | gain    | BASIS    |
| TCGA-AN-A0XU | RAD50 | cna | hetloss | TCGA     |
| TCGA-AO-A0JL | RAD50 | cna | hetloss | TCGA     |
| TCGA-BH-A0C0 | RAD50 | cna | hetloss | TCGA     |
| TCGA-BH-A1FU | RAD50 | cna | hetloss | TCGA     |
| TCGA-C8-A12L | RAD50 | cna | hetloss | TCGA     |
| TCGA-D8-A27M | RAD50 | cna | hetloss | TCGA     |
| TCGA-E2-A1L7 | RAD50 | cna | gain    | TCGA     |
| TCGA-E9-A1NC | RAD50 | cna | hetloss | TCGA     |
| TCGA-LL-A5YP | RAD50 | cna | hetloss | TCGA     |
| MB-0346      | RAD50 | cna | gain    | METABRIC |
| MB-2827      | RAD50 | cna | hetloss | METABRIC |
| MB-5070      | RAD50 | cna | hetloss | METABRIC |
| MB-5107      | RAD50 | cna | hetloss | METABRIC |
| MB-5465      | RAD50 | cna | hetloss | METABRIC |
| MB-6060      | RAD50 | cna | hetloss | METABRIC |
| MB-6098      | RAD50 | cna | hetloss | METABRIC |
| MB-7038      | RAD50 | cna | hetloss | METABRIC |
| MB-0420      | RAD50 | cna | hetloss | METABRIC |
| PD10014      | RAD50 | cna | hetloss | BASIS    |
| PD13296      | RAD50 | cna | hetloss | BASIS    |
| PD13297      | RAD50 | cna | hetloss | BASIS    |
| PD13771      | RAD50 | cna | gain    | BASIS    |
| PD22355      | RAD50 | cna | hetloss | BASIS    |

|              |        |     |         |          |
|--------------|--------|-----|---------|----------|
| PD23562      | RAD50  | cna | hetloss | BASIS    |
| PD23578      | RAD50  | cna | hetloss | BASIS    |
| PD24202      | RAD50  | cna | hetloss | BASIS    |
| PD24206      | RAD50  | cna | gain    | BASIS    |
| PD24337      | RAD50  | cna | hetloss | BASIS    |
| PD3890       | RAD50  | cna | hetloss | BASIS    |
| PD3905       | RAD50  | cna | gain    | BASIS    |
| PD4005       | RAD50  | cna | hetloss | BASIS    |
| PD5935       | RAD50  | cna | gain    | BASIS    |
| PD5945       | RAD50  | cna | gain    | BASIS    |
| PD6406       | RAD50  | cna | hetloss | BASIS    |
| PD6413       | RAD50  | cna | hetloss | BASIS    |
| PD7067       | RAD50  | cna | gain    | BASIS    |
| PD8980       | RAD50  | cna | hetloss | BASIS    |
| PD9585       | RAD50  | cna | hetloss | BASIS    |
| TCGA-A2-A25B | RAD51D | cna | amp     | TCGA     |
| TCGA-AO-A0JL | RAD51D | cna | gain    | TCGA     |
| TCGA-BH-A0AW | RAD51D | cna | gain    | TCGA     |
| TCGA-BH-A0C0 | RAD51D | cna | gain    | TCGA     |
| TCGA-BH-A18R | RAD51D | cna | homdel  | TCGA     |
| TCGA-C8-A12L | RAD51D | cna | gain    | TCGA     |
| TCGA-D8-A27M | RAD51D | cna | hetloss | TCGA     |
| TCGA-E2-A1L7 | RAD51D | cna | hetloss | TCGA     |
| TCGA-E9-A1NC | RAD51D | cna | hetloss | TCGA     |
| MB-0346      | RAD51D | cna | hetloss | METABRIC |
| MB-2827      | RAD51D | cna | hetloss | METABRIC |
| MB-5070      | RAD51D | cna | gain    | METABRIC |
| MB-5465      | RAD51D | cna | hetloss | METABRIC |
| MB-6060      | RAD51D | cna | hetloss | METABRIC |
| MB-6098      | RAD51D | cna | hetloss | METABRIC |
| MB-6271      | RAD51D | cna | hetloss | METABRIC |
| MB-7038      | RAD51D | cna | hetloss | METABRIC |
| MB-7048      | RAD51D | cna | hetloss | METABRIC |
| MB-0420      | RAD51D | cna | hetloss | METABRIC |
| PD11327      | RAD51D | cna | gain    | BASIS    |
| PD13297      | RAD51D | cna | hetloss | BASIS    |
| PD13299      | RAD51D | cna | gain    | BASIS    |
| PD23561      | RAD51D | cna | amp     | BASIS    |
| PD24206      | RAD51D | cna | hetloss | BASIS    |
| PD24337      | RAD51D | cna | hetloss | BASIS    |
| PD3890       | RAD51D | cna | hetloss | BASIS    |
| PD4005       | RAD51D | cna | hetloss | BASIS    |
| PD4967       | RAD51D | cna | hetloss | BASIS    |
| PD5945       | RAD51D | cna | gain    | BASIS    |
| PD5948       | RAD51D | cna | gain    | BASIS    |
| PD6406       | RAD51D | cna | hetloss | BASIS    |
| PD6413       | RAD51D | cna | hetloss | BASIS    |

|              |        |     |         |          |
|--------------|--------|-----|---------|----------|
| PD6731       | RAD51D | cna | hetloss | BASIS    |
| PD7067       | RAD51D | cna | gain    | BASIS    |
| PD7215       | RAD51D | cna | gain    | BASIS    |
| PD9004       | RAD51D | cna | gain    | BASIS    |
| PD9585       | RAD51D | cna | hetloss | BASIS    |
| PD9702       | RAD51D | cna | gain    | BASIS    |
| TCGA-AN-A0XU | RBMX   | cna | hetloss | TCGA     |
| TCGA-BH-A0AW | RBMX   | cna | gain    | TCGA     |
| TCGA-C8-A12L | RBMX   | cna | gain    | TCGA     |
| TCGA-E2-A1L7 | RBMX   | cna | hetloss | TCGA     |
| TCGA-E9-A1NC | RBMX   | cna | hetloss | TCGA     |
| TCGA-LL-A5YP | RBMX   | cna | gain    | TCGA     |
| MB-0346      | RBMX   | cna | hetloss | METABRIC |
| MB-2827      | RBMX   | cna | hetloss | METABRIC |
| MB-5465      | RBMX   | cna | hetloss | METABRIC |
| MB-6060      | RBMX   | cna | gain    | METABRIC |
| MB-6098      | RBMX   | cna | hetloss | METABRIC |
| MB-7038      | RBMX   | cna | gain    | METABRIC |
| PD10014      | RBMX   | cna | hetloss | BASIS    |
| PD13296      | RBMX   | cna | gain    | BASIS    |
| PD13299      | RBMX   | cna | amp     | BASIS    |
| PD13771      | RBMX   | cna | gain    | BASIS    |
| PD14442      | RBMX   | cna | gain    | BASIS    |
| PD23562      | RBMX   | cna | hetloss | BASIS    |
| PD23574      | RBMX   | cna | gain    | BASIS    |
| PD23578      | RBMX   | cna | hetloss | BASIS    |
| PD24202      | RBMX   | cna | hetloss | BASIS    |
| PD24206      | RBMX   | cna | gain    | BASIS    |
| PD3890       | RBMX   | cna | hetloss | BASIS    |
| PD3905       | RBMX   | cna | gain    | BASIS    |
| PD4107       | RBMX   | cna | gain    | BASIS    |
| PD4826       | RBMX   | cna | gain    | BASIS    |
| PD4967       | RBMX   | cna | gain    | BASIS    |
| PD5930       | RBMX   | cna | gain    | BASIS    |
| PD5935       | RBMX   | cna | gain    | BASIS    |
| PD5945       | RBMX   | cna | amp     | BASIS    |
| PD5948       | RBMX   | cna | gain    | BASIS    |
| PD6406       | RBMX   | cna | gain    | BASIS    |
| PD6413       | RBMX   | cna | gain    | BASIS    |
| PD7215       | RBMX   | cna | gain    | BASIS    |
| PD8621       | RBMX   | cna | amp     | BASIS    |
| PD8980       | RBMX   | cna | hetloss | BASIS    |
| PD9004       | RBMX   | cna | gain    | BASIS    |
| PD9702       | RBMX   | cna | gain    | BASIS    |
| TCGA-A2-A25B | REL    | cna | hetloss | TCGA     |
| TCGA-AN-A0XU | REL    | cna | gain    | TCGA     |
| TCGA-AO-A0JL | REL    | cna | gain    | TCGA     |

|              |      |     |         |          |
|--------------|------|-----|---------|----------|
| TCGA-BH-A0AW | REL  | cna | gain    | TCGA     |
| TCGA-BH-A0C0 | REL  | cna | gain    | TCGA     |
| TCGA-D8-A27M | REL  | cna | gain    | TCGA     |
| TCGA-E9-A1NC | REL  | cna | gain    | TCGA     |
| TCGA-LL-A5YP | REL  | cna | gain    | TCGA     |
| MB-2827      | REL  | cna | hetloss | METABRIC |
| MB-5465      | REL  | cna | amp     | METABRIC |
| MB-6271      | REL  | cna | hetloss | METABRIC |
| MB-7038      | REL  | cna | gain    | METABRIC |
| MB-7048      | REL  | cna | hetloss | METABRIC |
| PD10014      | REL  | cna | gain    | BASIS    |
| PD11327      | REL  | cna | hetloss | BASIS    |
| PD13296      | REL  | cna | gain    | BASIS    |
| PD13297      | REL  | cna | gain    | BASIS    |
| PD13299      | REL  | cna | gain    | BASIS    |
| PD22355      | REL  | cna | gain    | BASIS    |
| PD23562      | REL  | cna | gain    | BASIS    |
| PD23578      | REL  | cna | gain    | BASIS    |
| PD24186      | REL  | cna | gain    | BASIS    |
| PD24202      | REL  | cna | gain    | BASIS    |
| PD24206      | REL  | cna | hetloss | BASIS    |
| PD3890       | REL  | cna | hetloss | BASIS    |
| PD3905       | REL  | cna | gain    | BASIS    |
| PD4006       | REL  | cna | amp     | BASIS    |
| PD4107       | REL  | cna | gain    | BASIS    |
| PD4967       | REL  | cna | hetloss | BASIS    |
| PD5930       | REL  | cna | gain    | BASIS    |
| PD5935       | REL  | cna | gain    | BASIS    |
| PD5945       | REL  | cna | amp     | BASIS    |
| PD5948       | REL  | cna | gain    | BASIS    |
| PD7067       | REL  | cna | gain    | BASIS    |
| PD7215       | REL  | cna | gain    | BASIS    |
| PD8621       | REL  | cna | gain    | BASIS    |
| PD9004       | REL  | cna | gain    | BASIS    |
| PD9702       | REL  | cna | gain    | BASIS    |
| TCGA-A2-A25B | RELN | cna | gain    | TCGA     |
| TCGA-AN-A0XU | RELN | cna | hetloss | TCGA     |
| TCGA-AO-A0JL | RELN | cna | gain    | TCGA     |
| TCGA-BH-A0AW | RELN | cna | gain    | TCGA     |
| TCGA-C8-A12L | RELN | cna | hetloss | TCGA     |
| TCGA-D8-A27M | RELN | cna | gain    | TCGA     |
| TCGA-E2-A1L7 | RELN | cna | hetloss | TCGA     |
| TCGA-E9-A1NC | RELN | cna | gain    | TCGA     |
| TCGA-LL-A5YP | RELN | cna | gain    | TCGA     |
| MB-0346      | RELN | cna | hetloss | METABRIC |
| MB-5465      | RELN | cna | hetloss | METABRIC |
| MB-6098      | RELN | cna | hetloss | METABRIC |

|              |      |     |         |          |
|--------------|------|-----|---------|----------|
| MB-7038      | RELN | cna | gain    | METABRIC |
| MB-7048      | RELN | cna | gain    | METABRIC |
| PD11327      | RELN | cna | amp     | BASIS    |
| PD13296      | RELN | cna | hetloss | BASIS    |
| PD22355      | RELN | cna | hetloss | BASIS    |
| PD23574      | RELN | cna | gain    | BASIS    |
| PD23578      | RELN | cna | hetloss | BASIS    |
| PD24186      | RELN | cna | amp     | BASIS    |
| PD24337      | RELN | cna | hetloss | BASIS    |
| PD3890       | RELN | cna | hetloss | BASIS    |
| PD3905       | RELN | cna | gain    | BASIS    |
| PD4005       | RELN | cna | hetloss | BASIS    |
| PD4006       | RELN | cna | amp     | BASIS    |
| PD4107       | RELN | cna | gain    | BASIS    |
| PD4826       | RELN | cna | gain    | BASIS    |
| PD5930       | RELN | cna | gain    | BASIS    |
| PD5935       | RELN | cna | gain    | BASIS    |
| PD5945       | RELN | cna | amp     | BASIS    |
| PD5948       | RELN | cna | gain    | BASIS    |
| PD6406       | RELN | cna | gain    | BASIS    |
| PD7067       | RELN | cna | gain    | BASIS    |
| PD7215       | RELN | cna | gain    | BASIS    |
| PD8621       | RELN | cna | gain    | BASIS    |
| PD9004       | RELN | cna | gain    | BASIS    |
| PD9585       | RELN | cna | hetloss | BASIS    |
| PD9702       | RELN | cna | gain    | BASIS    |
| TCGA-A2-A25B | RPA1 | cna | hetloss | TCGA     |
| TCGA-AN-A0XU | RPA1 | cna | hetloss | TCGA     |
| TCGA-AO-A0JL | RPA1 | cna | hetloss | TCGA     |
| TCGA-BH-A0AW | RPA1 | cna | hetloss | TCGA     |
| TCGA-BH-A0C0 | RPA1 | cna | hetloss | TCGA     |
| TCGA-C8-A12L | RPA1 | cna | hetloss | TCGA     |
| TCGA-D8-A27M | RPA1 | cna | hetloss | TCGA     |
| TCGA-E2-A1L7 | RPA1 | cna | hetloss | TCGA     |
| TCGA-E9-A1NC | RPA1 | cna | hetloss | TCGA     |
| TCGA-EW-A10X | RPA1 | cna | hetloss | TCGA     |
| TCGA-LL-A5YP | RPA1 | cna | hetloss | TCGA     |
| MB-0346      | RPA1 | cna | hetloss | METABRIC |
| MB-2827      | RPA1 | cna | hetloss | METABRIC |
| MB-5107      | RPA1 | cna | hetloss | METABRIC |
| MB-6098      | RPA1 | cna | gain    | METABRIC |
| MB-6271      | RPA1 | cna | hetloss | METABRIC |
| MB-7032      | RPA1 | cna | gain    | METABRIC |
| MB-7048      | RPA1 | cna | hetloss | METABRIC |
| MB-0420      | RPA1 | cna | hetloss | METABRIC |
| PD10014      | RPA1 | cna | hetloss | BASIS    |
| PD11742      | RPA1 | cna | hetloss | BASIS    |

|              |      |     |         |          |
|--------------|------|-----|---------|----------|
| PD13296      | RPA1 | cna | hetloss | BASIS    |
| PD13771      | RPA1 | cna | hetloss | BASIS    |
| PD24202      | RPA1 | cna | hetloss | BASIS    |
| PD24206      | RPA1 | cna | hetloss | BASIS    |
| PD24337      | RPA1 | cna | hetloss | BASIS    |
| PD3890       | RPA1 | cna | hetloss | BASIS    |
| PD3905       | RPA1 | cna | gain    | BASIS    |
| PD4005       | RPA1 | cna | hetloss | BASIS    |
| PD4826       | RPA1 | cna | hetloss | BASIS    |
| PD4967       | RPA1 | cna | hetloss | BASIS    |
| PD5945       | RPA1 | cna | gain    | BASIS    |
| PD6406       | RPA1 | cna | hetloss | BASIS    |
| PD6413       | RPA1 | cna | hetloss | BASIS    |
| PD6731       | RPA1 | cna | hetloss | BASIS    |
| PD7067       | RPA1 | cna | gain    | BASIS    |
| PD9585       | RPA1 | cna | hetloss | BASIS    |
| PD9702       | RPA1 | cna | gain    | BASIS    |
| TCGA-A2-A25B | SET  | cna | gain    | TCGA     |
| TCGA-AN-A0XU | SET  | cna | hetloss | TCGA     |
| TCGA-AO-A0JL | SET  | cna | hetloss | TCGA     |
| TCGA-BH-A0C0 | SET  | cna | gain    | TCGA     |
| TCGA-C8-A12L | SET  | cna | gain    | TCGA     |
| TCGA-E2-A1L7 | SET  | cna | gain    | TCGA     |
| TCGA-E9-A1NC | SET  | cna | hetloss | TCGA     |
| TCGA-LL-A5YP | SET  | cna | hetloss | TCGA     |
| MB-0346      | SET  | cna | hetloss | METABRIC |
| MB-2827      | SET  | cna | hetloss | METABRIC |
| MB-5070      | SET  | cna | hetloss | METABRIC |
| MB-5107      | SET  | cna | gain    | METABRIC |
| MB-7038      | SET  | cna | hetloss | METABRIC |
| MB-0420      | SET  | cna | hetloss | METABRIC |
| PD10014      | SET  | cna | gain    | BASIS    |
| PD11327      | SET  | cna | hetloss | BASIS    |
| PD13297      | SET  | cna | hetloss | BASIS    |
| PD13299      | SET  | cna | gain    | BASIS    |
| PD22355      | SET  | cna | gain    | BASIS    |
| PD23578      | SET  | cna | hetloss | BASIS    |
| PD24186      | SET  | cna | amp     | BASIS    |
| PD24202      | SET  | cna | hetloss | BASIS    |
| PD24337      | SET  | cna | hetloss | BASIS    |
| PD3890       | SET  | cna | hetloss | BASIS    |
| PD3905       | SET  | cna | gain    | BASIS    |
| PD4005       | SET  | cna | hetloss | BASIS    |
| PD4006       | SET  | cna | gain    | BASIS    |
| PD4107       | SET  | cna | hetloss | BASIS    |
| PD5930       | SET  | cna | hetloss | BASIS    |
| PD5945       | SET  | cna | gain    | BASIS    |



|              |       |     |         |          |
|--------------|-------|-----|---------|----------|
| PD5948       | SET   | cna | gain    | BASIS    |
| PD6406       | SET   | cna | hetloss | BASIS    |
| PD6731       | SET   | cna | hetloss | BASIS    |
| PD7067       | SET   | cna | gain    | BASIS    |
| PD7215       | SET   | cna | gain    | BASIS    |
| PD8621       | SET   | cna | gain    | BASIS    |
| PD8980       | SET   | cna | gain    | BASIS    |
| PD9004       | SET   | cna | hetloss | BASIS    |
| TCGA-A2-A25B | SYNE1 | cna | hetloss | TCGA     |
| TCGA-AN-A0XU | SYNE1 | cna | gain    | TCGA     |
| TCGA-AO-A0JL | SYNE1 | cna | hetloss | TCGA     |
| TCGA-BH-A0AW | SYNE1 | cna | amp     | TCGA     |
| TCGA-BH-A0C0 | SYNE1 | cna | gain    | TCGA     |
| TCGA-C8-A12L | SYNE1 | cna | gain    | TCGA     |
| TCGA-D8-A27M | SYNE1 | cna | hetloss | TCGA     |
| MB-2827      | SYNE1 | cna | hetloss | METABRIC |
| MB-5070      | SYNE1 | cna | gain    | METABRIC |
| MB-5107      | SYNE1 | cna | hetloss | METABRIC |
| MB-6098      | SYNE1 | cna | hetloss | METABRIC |
| MB-7038      | SYNE1 | cna | amp     | METABRIC |
| MB-7048      | SYNE1 | cna | hetloss | METABRIC |
| MB-0420      | SYNE1 | cna | hetloss | METABRIC |
| PD11327      | SYNE1 | cna | gain    | BASIS    |
| PD13296      | SYNE1 | cna | homdel  | BASIS    |
| PD13297      | SYNE1 | cna | hetloss | BASIS    |
| PD13299      | SYNE1 | cna | gain    | BASIS    |
| PD23562      | SYNE1 | cna | gain    | BASIS    |
| PD23574      | SYNE1 | cna | gain    | BASIS    |
| PD24186      | SYNE1 | cna | gain    | BASIS    |
| PD3890       | SYNE1 | cna | hetloss | BASIS    |
| PD3905       | SYNE1 | cna | gain    | BASIS    |
| PD4005       | SYNE1 | cna | hetloss | BASIS    |
| PD4006       | SYNE1 | cna | gain    | BASIS    |
| PD4826       | SYNE1 | cna | gain    | BASIS    |
| PD4967       | SYNE1 | cna | hetloss | BASIS    |
| PD5935       | SYNE1 | cna | gain    | BASIS    |
| PD5945       | SYNE1 | cna | amp     | BASIS    |
| PD6406       | SYNE1 | cna | hetloss | BASIS    |
| PD6413       | SYNE1 | cna | hetloss | BASIS    |
| PD6731       | SYNE1 | cna | hetloss | BASIS    |
| PD7067       | SYNE1 | cna | amp     | BASIS    |
| PD7215       | SYNE1 | cna | gain    | BASIS    |
| PD8980       | SYNE1 | cna | gain    | BASIS    |
| PD9004       | SYNE1 | cna | gain    | BASIS    |
| PD9585       | SYNE1 | cna | hetloss | BASIS    |
| PD9702       | SYNE1 | cna | gain    | BASIS    |
| TCGA-AN-A0XU | TAF15 | cna | gain    | TCGA     |

|              |       |     |         |          |
|--------------|-------|-----|---------|----------|
| TCGA-AO-A0JL | TAF15 | cna | gain    | TCGA     |
| TCGA-BH-A0AW | TAF15 | cna | gain    | TCGA     |
| TCGA-BH-A0C0 | TAF15 | cna | gain    | TCGA     |
| TCGA-BH-A18R | TAF15 | cna | homdel  | TCGA     |
| TCGA-C8-A12L | TAF15 | cna | hetloss | TCGA     |
| TCGA-D8-A27M | TAF15 | cna | hetloss | TCGA     |
| TCGA-E2-A1L7 | TAF15 | cna | hetloss | TCGA     |
| TCGA-E9-A1NC | TAF15 | cna | hetloss | TCGA     |
| MB-0346      | TAF15 | cna | hetloss | METABRIC |
| MB-2827      | TAF15 | cna | hetloss | METABRIC |
| MB-5070      | TAF15 | cna | gain    | METABRIC |
| MB-5465      | TAF15 | cna | hetloss | METABRIC |
| MB-6060      | TAF15 | cna | hetloss | METABRIC |
| MB-6098      | TAF15 | cna | hetloss | METABRIC |
| MB-6271      | TAF15 | cna | hetloss | METABRIC |
| MB-7038      | TAF15 | cna | hetloss | METABRIC |
| MB-7048      | TAF15 | cna | hetloss | METABRIC |
| MB-0420      | TAF15 | cna | hetloss | METABRIC |
| PD13297      | TAF15 | cna | hetloss | BASIS    |
| PD13299      | TAF15 | cna | gain    | BASIS    |
| PD13771      | TAF15 | cna | hetloss | BASIS    |
| PD23561      | TAF15 | cna | gain    | BASIS    |
| PD24206      | TAF15 | cna | hetloss | BASIS    |
| PD24337      | TAF15 | cna | hetloss | BASIS    |
| PD3890       | TAF15 | cna | hetloss | BASIS    |
| PD4005       | TAF15 | cna | hetloss | BASIS    |
| PD4967       | TAF15 | cna | hetloss | BASIS    |
| PD5945       | TAF15 | cna | gain    | BASIS    |
| PD5948       | TAF15 | cna | gain    | BASIS    |
| PD6406       | TAF15 | cna | hetloss | BASIS    |
| PD6413       | TAF15 | cna | hetloss | BASIS    |
| PD6731       | TAF15 | cna | hetloss | BASIS    |
| PD7067       | TAF15 | cna | gain    | BASIS    |
| PD7215       | TAF15 | cna | gain    | BASIS    |
| PD9004       | TAF15 | cna | gain    | BASIS    |
| PD9585       | TAF15 | cna | hetloss | BASIS    |
| PD9702       | TAF15 | cna | gain    | BASIS    |
| TCGA-AN-A0XU | TCF12 | cna | hetloss | TCGA     |
| TCGA-AO-A0JL | TCF12 | cna | hetloss | TCGA     |
| TCGA-BH-A0AW | TCF12 | cna | hetloss | TCGA     |
| TCGA-BH-A0C0 | TCF12 | cna | hetloss | TCGA     |
| TCGA-C8-A12L | TCF12 | cna | gain    | TCGA     |
| TCGA-D8-A27M | TCF12 | cna | hetloss | TCGA     |
| TCGA-E2-A1L7 | TCF12 | cna | hetloss | TCGA     |
| TCGA-E9-A1NC | TCF12 | cna | hetloss | TCGA     |
| TCGA-LL-A5YP | TCF12 | cna | hetloss | TCGA     |
| MB-0346      | TCF12 | cna | gain    | METABRIC |

|              |        |     |         |          |
|--------------|--------|-----|---------|----------|
| MB-5070      | TCF12  | cna | hetloss | METABRIC |
| MB-5107      | TCF12  | cna | gain    | METABRIC |
| MB-6060      | TCF12  | cna | gain    | METABRIC |
| MB-6098      | TCF12  | cna | hetloss | METABRIC |
| MB-7048      | TCF12  | cna | hetloss | METABRIC |
| PD10014      | TCF12  | cna | hetloss | BASIS    |
| PD11327      | TCF12  | cna | gain    | BASIS    |
| PD11742      | TCF12  | cna | hetloss | BASIS    |
| PD13296      | TCF12  | cna | homdel  | BASIS    |
| PD13297      | TCF12  | cna | hetloss | BASIS    |
| PD22355      | TCF12  | cna | hetloss | BASIS    |
| PD24202      | TCF12  | cna | hetloss | BASIS    |
| PD3890       | TCF12  | cna | hetloss | BASIS    |
| PD3905       | TCF12  | cna | gain    | BASIS    |
| PD4005       | TCF12  | cna | hetloss | BASIS    |
| PD4006       | TCF12  | cna | gain    | BASIS    |
| PD4107       | TCF12  | cna | hetloss | BASIS    |
| PD5930       | TCF12  | cna | hetloss | BASIS    |
| PD5935       | TCF12  | cna | gain    | BASIS    |
| PD5945       | TCF12  | cna | gain    | BASIS    |
| PD5948       | TCF12  | cna | hetloss | BASIS    |
| PD6406       | TCF12  | cna | hetloss | BASIS    |
| PD6413       | TCF12  | cna | hetloss | BASIS    |
| PD7067       | TCF12  | cna | gain    | BASIS    |
| PD7215       | TCF12  | cna | gain    | BASIS    |
| PD8980       | TCF12  | cna | hetloss | BASIS    |
| PD9585       | TCF12  | cna | hetloss | BASIS    |
| PD9702       | TCF12  | cna | gain    | BASIS    |
| TCGA-A2-A25B | TCF7L2 | cna | hetloss | TCGA     |
| TCGA-AN-A0XU | TCF7L2 | cna | hetloss | TCGA     |
| TCGA-AO-A0JL | TCF7L2 | cna | hetloss | TCGA     |
| TCGA-BH-A18R | TCF7L2 | cna | gain    | TCGA     |
| TCGA-C8-A12L | TCF7L2 | cna | hetloss | TCGA     |
| TCGA-D8-A27M | TCF7L2 | cna | hetloss | TCGA     |
| TCGA-E2-A1L7 | TCF7L2 | cna | hetloss | TCGA     |
| TCGA-E9-A1NC | TCF7L2 | cna | hetloss | TCGA     |
| TCGA-LL-A5YP | TCF7L2 | cna | gain    | TCGA     |
| MB-0346      | TCF7L2 | cna | hetloss | METABRIC |
| MB-2827      | TCF7L2 | cna | hetloss | METABRIC |
| MB-5070      | TCF7L2 | cna | hetloss | METABRIC |
| MB-5107      | TCF7L2 | cna | hetloss | METABRIC |
| MB-6098      | TCF7L2 | cna | hetloss | METABRIC |
| MB-7038      | TCF7L2 | cna | hetloss | METABRIC |
| MB-0420      | TCF7L2 | cna | hetloss | METABRIC |
| PD10014      | TCF7L2 | cna | hetloss | BASIS    |
| PD11742      | TCF7L2 | cna | hetloss | BASIS    |
| PD13296      | TCF7L2 | cna | hetloss | BASIS    |

|              |        |     |         |          |
|--------------|--------|-----|---------|----------|
| PD23562      | TCF7L2 | cna | gain    | BASIS    |
| PD23574      | TCF7L2 | cna | gain    | BASIS    |
| PD23578      | TCF7L2 | cna | hetloss | BASIS    |
| PD24206      | TCF7L2 | cna | gain    | BASIS    |
| PD24337      | TCF7L2 | cna | hetloss | BASIS    |
| PD3905       | TCF7L2 | cna | gain    | BASIS    |
| PD4005       | TCF7L2 | cna | hetloss | BASIS    |
| PD4006       | TCF7L2 | cna | gain    | BASIS    |
| PD4107       | TCF7L2 | cna | gain    | BASIS    |
| PD5935       | TCF7L2 | cna | gain    | BASIS    |
| PD5945       | TCF7L2 | cna | gain    | BASIS    |
| PD5948       | TCF7L2 | cna | gain    | BASIS    |
| PD6731       | TCF7L2 | cna | hetloss | BASIS    |
| PD7067       | TCF7L2 | cna | gain    | BASIS    |
| PD7215       | TCF7L2 | cna | gain    | BASIS    |
| PD8621       | TCF7L2 | cna | gain    | BASIS    |
| PD8980       | TCF7L2 | cna | hetloss | BASIS    |
| PD9585       | TCF7L2 | cna | hetloss | BASIS    |
| PD9702       | TCF7L2 | cna | gain    | BASIS    |
| TCGA-A2-A25B | TCL1A  | cna | hetloss | TCGA     |
| TCGA-AN-A0XU | TCL1A  | cna | gain    | TCGA     |
| TCGA-AO-A0JL | TCL1A  | cna | hetloss | TCGA     |
| TCGA-BH-A0AW | TCL1A  | cna | hetloss | TCGA     |
| TCGA-BH-A1FU | TCL1A  | cna | gain    | TCGA     |
| TCGA-C8-A12L | TCL1A  | cna | gain    | TCGA     |
| TCGA-D8-A27M | TCL1A  | cna | hetloss | TCGA     |
| TCGA-E2-A1L7 | TCL1A  | cna | gain    | TCGA     |
| TCGA-E9-A1NC | TCL1A  | cna | hetloss | TCGA     |
| TCGA-LL-A5YP | TCL1A  | cna | hetloss | TCGA     |
| MB-0346      | TCL1A  | cna | gain    | METABRIC |
| MB-2827      | TCL1A  | cna | hetloss | METABRIC |
| MB-5070      | TCL1A  | cna | hetloss | METABRIC |
| MB-5107      | TCL1A  | cna | hetloss | METABRIC |
| MB-6098      | TCL1A  | cna | hetloss | METABRIC |
| MTS-T0064    | TCL1A  | cna | hetloss | METABRIC |
| PD10014      | TCL1A  | cna | hetloss | BASIS    |
| PD11742      | TCL1A  | cna | hetloss | BASIS    |
| PD13296      | TCL1A  | cna | gain    | BASIS    |
| PD13297      | TCL1A  | cna | hetloss | BASIS    |
| PD13771      | TCL1A  | cna | hetloss | BASIS    |
| PD23562      | TCL1A  | cna | gain    | BASIS    |
| PD23578      | TCL1A  | cna | hetloss | BASIS    |
| PD24202      | TCL1A  | cna | hetloss | BASIS    |
| PD24206      | TCL1A  | cna | gain    | BASIS    |
| PD24337      | TCL1A  | cna | hetloss | BASIS    |
| PD3890       | TCL1A  | cna | hetloss | BASIS    |
| PD3905       | TCL1A  | cna | gain    | BASIS    |

|              |       |     |         |          |
|--------------|-------|-----|---------|----------|
| PD4005       | TCL1A | cna | hetloss | BASIS    |
| PD4006       | TCL1A | cna | gain    | BASIS    |
| PD4826       | TCL1A | cna | gain    | BASIS    |
| PD5945       | TCL1A | cna | gain    | BASIS    |
| PD5948       | TCL1A | cna | gain    | BASIS    |
| PD6406       | TCL1A | cna | hetloss | BASIS    |
| PD6413       | TCL1A | cna | hetloss | BASIS    |
| PD7067       | TCL1A | cna | gain    | BASIS    |
| PD8980       | TCL1A | cna | hetloss | BASIS    |
| PD9702       | TCL1A | cna | gain    | BASIS    |
| TCGA-A2-A25B | TCL6  | cna | hetloss | TCGA     |
| TCGA-AN-A0XU | TCL6  | cna | gain    | TCGA     |
| TCGA-AO-A0JL | TCL6  | cna | hetloss | TCGA     |
| TCGA-BH-A0AW | TCL6  | cna | hetloss | TCGA     |
| TCGA-BH-A1FU | TCL6  | cna | gain    | TCGA     |
| TCGA-C8-A12L | TCL6  | cna | gain    | TCGA     |
| TCGA-D8-A27M | TCL6  | cna | hetloss | TCGA     |
| TCGA-E2-A1L7 | TCL6  | cna | gain    | TCGA     |
| TCGA-E9-A1NC | TCL6  | cna | hetloss | TCGA     |
| TCGA-LL-A5YP | TCL6  | cna | hetloss | TCGA     |
| MB-0346      | TCL6  | cna | gain    | METABRIC |
| MB-2827      | TCL6  | cna | hetloss | METABRIC |
| MB-5070      | TCL6  | cna | hetloss | METABRIC |
| MB-5107      | TCL6  | cna | hetloss | METABRIC |
| MB-6098      | TCL6  | cna | hetloss | METABRIC |
| MTS-T0064    | TCL6  | cna | hetloss | METABRIC |
| PD10014      | TCL6  | cna | hetloss | BASIS    |
| PD11742      | TCL6  | cna | hetloss | BASIS    |
| PD13296      | TCL6  | cna | gain    | BASIS    |
| PD13297      | TCL6  | cna | hetloss | BASIS    |
| PD13771      | TCL6  | cna | hetloss | BASIS    |
| PD23562      | TCL6  | cna | gain    | BASIS    |
| PD23578      | TCL6  | cna | hetloss | BASIS    |
| PD24202      | TCL6  | cna | hetloss | BASIS    |
| PD24206      | TCL6  | cna | gain    | BASIS    |
| PD24337      | TCL6  | cna | hetloss | BASIS    |
| PD3890       | TCL6  | cna | hetloss | BASIS    |
| PD3905       | TCL6  | cna | gain    | BASIS    |
| PD4005       | TCL6  | cna | hetloss | BASIS    |
| PD4006       | TCL6  | cna | gain    | BASIS    |
| PD4826       | TCL6  | cna | gain    | BASIS    |
| PD5945       | TCL6  | cna | gain    | BASIS    |
| PD5948       | TCL6  | cna | gain    | BASIS    |
| PD6406       | TCL6  | cna | hetloss | BASIS    |
| PD6413       | TCL6  | cna | hetloss | BASIS    |
| PD7067       | TCL6  | cna | gain    | BASIS    |
| PD8980       | TCL6  | cna | hetloss | BASIS    |

|              |         |     |         |          |
|--------------|---------|-----|---------|----------|
| PD9702       | TCL6    | cna | gain    | BASIS    |
| TCGA-A2-A25B | TLR4    | cna | gain    | TCGA     |
| TCGA-AN-A0XU | TLR4    | cna | hetloss | TCGA     |
| TCGA-AO-A0JL | TLR4    | cna | hetloss | TCGA     |
| TCGA-BH-A0C0 | TLR4    | cna | gain    | TCGA     |
| TCGA-C8-A12L | TLR4    | cna | hetloss | TCGA     |
| TCGA-E2-A1L7 | TLR4    | cna | gain    | TCGA     |
| TCGA-E9-A1NC | TLR4    | cna | hetloss | TCGA     |
| TCGA-LL-A5YP | TLR4    | cna | hetloss | TCGA     |
| MB-0346      | TLR4    | cna | hetloss | METABRIC |
| MB-5070      | TLR4    | cna | hetloss | METABRIC |
| MB-5107      | TLR4    | cna | hetloss | METABRIC |
| MB-6098      | TLR4    | cna | hetloss | METABRIC |
| MB-7038      | TLR4    | cna | hetloss | METABRIC |
| MB-0420      | TLR4    | cna | hetloss | METABRIC |
| PD10014      | TLR4    | cna | gain    | BASIS    |
| PD13296      | TLR4    | cna | hetloss | BASIS    |
| PD13297      | TLR4    | cna | hetloss | BASIS    |
| PD23562      | TLR4    | cna | amp     | BASIS    |
| PD23578      | TLR4    | cna | hetloss | BASIS    |
| PD24186      | TLR4    | cna | amp     | BASIS    |
| PD24202      | TLR4    | cna | hetloss | BASIS    |
| PD24206      | TLR4    | cna | gain    | BASIS    |
| PD24337      | TLR4    | cna | hetloss | BASIS    |
| PD3890       | TLR4    | cna | hetloss | BASIS    |
| PD3905       | TLR4    | cna | gain    | BASIS    |
| PD4005       | TLR4    | cna | hetloss | BASIS    |
| PD4006       | TLR4    | cna | hetloss | BASIS    |
| PD4107       | TLR4    | cna | hetloss | BASIS    |
| PD5930       | TLR4    | cna | gain    | BASIS    |
| PD5945       | TLR4    | cna | gain    | BASIS    |
| PD6406       | TLR4    | cna | hetloss | BASIS    |
| PD6731       | TLR4    | cna | hetloss | BASIS    |
| PD7067       | TLR4    | cna | hetloss | BASIS    |
| PD7215       | TLR4    | cna | gain    | BASIS    |
| PD8621       | TLR4    | cna | gain    | BASIS    |
| PD8980       | TLR4    | cna | gain    | BASIS    |
| PD9004       | TLR4    | cna | hetloss | BASIS    |
| PD9585       | TLR4    | cna | hetloss | BASIS    |
| TCGA-A2-A25B | TNFAIP3 | cna | hetloss | TCGA     |
| TCGA-AN-A0XU | TNFAIP3 | cna | amp     | TCGA     |
| TCGA-AO-A0JL | TNFAIP3 | cna | hetloss | TCGA     |
| TCGA-BH-A0AW | TNFAIP3 | cna | amp     | TCGA     |
| TCGA-BH-A0C0 | TNFAIP3 | cna | gain    | TCGA     |
| TCGA-BH-A18R | TNFAIP3 | cna | amp     | TCGA     |
| TCGA-C8-A12L | TNFAIP3 | cna | gain    | TCGA     |
| TCGA-D8-A27M | TNFAIP3 | cna | hetloss | TCGA     |

|              |         |     |         |          |
|--------------|---------|-----|---------|----------|
| MB-5070      | TNFAIP3 | cna | amp     | METABRIC |
| MB-6098      | TNFAIP3 | cna | hetloss | METABRIC |
| MB-7032      | TNFAIP3 | cna | hetloss | METABRIC |
| MB-7038      | TNFAIP3 | cna | amp     | METABRIC |
| MB-7048      | TNFAIP3 | cna | hetloss | METABRIC |
| MB-0420      | TNFAIP3 | cna | hetloss | METABRIC |
| PD11327      | TNFAIP3 | cna | gain    | BASIS    |
| PD13299      | TNFAIP3 | cna | gain    | BASIS    |
| PD13771      | TNFAIP3 | cna | hetloss | BASIS    |
| PD22355      | TNFAIP3 | cna | gain    | BASIS    |
| PD23562      | TNFAIP3 | cna | gain    | BASIS    |
| PD23574      | TNFAIP3 | cna | gain    | BASIS    |
| PD24186      | TNFAIP3 | cna | gain    | BASIS    |
| PD24202      | TNFAIP3 | cna | gain    | BASIS    |
| PD24206      | TNFAIP3 | cna | gain    | BASIS    |
| PD3890       | TNFAIP3 | cna | gain    | BASIS    |
| PD3905       | TNFAIP3 | cna | gain    | BASIS    |
| PD4006       | TNFAIP3 | cna | hetloss | BASIS    |
| PD4107       | TNFAIP3 | cna | amp     | BASIS    |
| PD4826       | TNFAIP3 | cna | gain    | BASIS    |
| PD5935       | TNFAIP3 | cna | gain    | BASIS    |
| PD5945       | TNFAIP3 | cna | amp     | BASIS    |
| PD6406       | TNFAIP3 | cna | hetloss | BASIS    |
| PD6731       | TNFAIP3 | cna | hetloss | BASIS    |
| PD7067       | TNFAIP3 | cna | amp     | BASIS    |
| PD7215       | TNFAIP3 | cna | gain    | BASIS    |
| PD8980       | TNFAIP3 | cna | gain    | BASIS    |
| PD9004       | TNFAIP3 | cna | homdel  | BASIS    |
| PD9585       | TNFAIP3 | cna | hetloss | BASIS    |
| PD9702       | TNFAIP3 | cna | gain    | BASIS    |
| TCGA-A2-A25B | TOX     | cna | gain    | TCGA     |
| TCGA-AO-A0JL | TOX     | cna | amp     | TCGA     |
| TCGA-BH-A0AW | TOX     | cna | gain    | TCGA     |
| TCGA-BH-A0C0 | TOX     | cna | gain    | TCGA     |
| TCGA-BH-A18R | TOX     | cna | homdel  | TCGA     |
| TCGA-BH-A1FU | TOX     | cna | gain    | TCGA     |
| TCGA-D8-A27M | TOX     | cna | amp     | TCGA     |
| TCGA-E2-A1L7 | TOX     | cna | gain    | TCGA     |
| TCGA-E9-A1NC | TOX     | cna | hetloss | TCGA     |
| TCGA-LL-A5YP | TOX     | cna | gain    | TCGA     |
| MB-0346      | TOX     | cna | gain    | METABRIC |
| MB-5465      | TOX     | cna | hetloss | METABRIC |
| MB-6060      | TOX     | cna | amp     | METABRIC |
| MB-6098      | TOX     | cna | gain    | METABRIC |
| MB-7038      | TOX     | cna | gain    | METABRIC |
| PD10014      | TOX     | cna | amp     | BASIS    |
| PD11327      | TOX     | cna | gain    | BASIS    |

|              |      |     |         |          |
|--------------|------|-----|---------|----------|
| PD13296      | TOX  | cna | hetloss | BASIS    |
| PD13299      | TOX  | cna | gain    | BASIS    |
| PD23562      | TOX  | cna | gain    | BASIS    |
| PD23574      | TOX  | cna | gain    | BASIS    |
| PD23578      | TOX  | cna | hetloss | BASIS    |
| PD24186      | TOX  | cna | gain    | BASIS    |
| PD24202      | TOX  | cna | hetloss | BASIS    |
| PD24206      | TOX  | cna | amp     | BASIS    |
| PD3905       | TOX  | cna | gain    | BASIS    |
| PD4005       | TOX  | cna | hetloss | BASIS    |
| PD4006       | TOX  | cna | gain    | BASIS    |
| PD4826       | TOX  | cna | amp     | BASIS    |
| PD5935       | TOX  | cna | gain    | BASIS    |
| PD5945       | TOX  | cna | gain    | BASIS    |
| PD7067       | TOX  | cna | amp     | BASIS    |
| PD7215       | TOX  | cna | amp     | BASIS    |
| PD8621       | TOX  | cna | gain    | BASIS    |
| PD8980       | TOX  | cna | gain    | BASIS    |
| PD9004       | TOX  | cna | gain    | BASIS    |
| PD9585       | TOX  | cna | hetloss | BASIS    |
| PD9702       | TOX  | cna | gain    | BASIS    |
| TCGA-AN-A0XU | TSC2 | cna | hetloss | TCGA     |
| TCGA-AO-A0JL | TSC2 | cna | gain    | TCGA     |
| TCGA-BH-A0AW | TSC2 | cna | gain    | TCGA     |
| TCGA-BH-A0C0 | TSC2 | cna | gain    | TCGA     |
| TCGA-C8-A12L | TSC2 | cna | gain    | TCGA     |
| TCGA-E2-A1L7 | TSC2 | cna | hetloss | TCGA     |
| TCGA-E9-A1NC | TSC2 | cna | hetloss | TCGA     |
| TCGA-LL-A5YP | TSC2 | cna | gain    | TCGA     |
| MB-0346      | TSC2 | cna | hetloss | METABRIC |
| MB-5465      | TSC2 | cna | hetloss | METABRIC |
| MB-6271      | TSC2 | cna | gain    | METABRIC |
| MB-7032      | TSC2 | cna | gain    | METABRIC |
| PD11327      | TSC2 | cna | gain    | BASIS    |
| PD11742      | TSC2 | cna | gain    | BASIS    |
| PD13296      | TSC2 | cna | gain    | BASIS    |
| PD13297      | TSC2 | cna | hetloss | BASIS    |
| PD13299      | TSC2 | cna | gain    | BASIS    |
| PD22355      | TSC2 | cna | hetloss | BASIS    |
| PD23578      | TSC2 | cna | hetloss | BASIS    |
| PD24202      | TSC2 | cna | hetloss | BASIS    |
| PD24337      | TSC2 | cna | hetloss | BASIS    |
| PD3905       | TSC2 | cna | gain    | BASIS    |
| PD4005       | TSC2 | cna | gain    | BASIS    |
| PD4006       | TSC2 | cna | gain    | BASIS    |
| PD4107       | TSC2 | cna | gain    | BASIS    |
| PD4826       | TSC2 | cna | gain    | BASIS    |



|              |       |     |         |          |
|--------------|-------|-----|---------|----------|
| PD4967       | TSC2  | cna | gain    | BASIS    |
| PD5930       | TSC2  | cna | gain    | BASIS    |
| PD5935       | TSC2  | cna | gain    | BASIS    |
| PD5945       | TSC2  | cna | gain    | BASIS    |
| PD5948       | TSC2  | cna | gain    | BASIS    |
| PD6413       | TSC2  | cna | gain    | BASIS    |
| PD7067       | TSC2  | cna | gain    | BASIS    |
| PD7215       | TSC2  | cna | amp     | BASIS    |
| PD8621       | TSC2  | cna | gain    | BASIS    |
| PD9004       | TSC2  | cna | gain    | BASIS    |
| PD9585       | TSC2  | cna | hetloss | BASIS    |
| PD9702       | TSC2  | cna | gain    | BASIS    |
| TCGA-AN-A0XU | TUSC3 | cna | hetloss | TCGA     |
| TCGA-AO-A0JL | TUSC3 | cna | hetloss | TCGA     |
| TCGA-BH-A0C0 | TUSC3 | cna | hetloss | TCGA     |
| TCGA-BH-A1FU | TUSC3 | cna | homdel  | TCGA     |
| TCGA-C8-A12L | TUSC3 | cna | gain    | TCGA     |
| TCGA-D8-A27M | TUSC3 | cna | hetloss | TCGA     |
| TCGA-E2-A1L7 | TUSC3 | cna | hetloss | TCGA     |
| TCGA-E9-A1NC | TUSC3 | cna | hetloss | TCGA     |
| TCGA-LL-A5YP | TUSC3 | cna | hetloss | TCGA     |
| MB-0346      | TUSC3 | cna | gain    | METABRIC |
| MB-2827      | TUSC3 | cna | hetloss | METABRIC |
| MB-5070      | TUSC3 | cna | hetloss | METABRIC |
| MB-5465      | TUSC3 | cna | hetloss | METABRIC |
| MB-6060      | TUSC3 | cna | hetloss | METABRIC |
| MB-6098      | TUSC3 | cna | hetloss | METABRIC |
| MB-7038      | TUSC3 | cna | gain    | METABRIC |
| MB-0420      | TUSC3 | cna | hetloss | METABRIC |
| MTS-T0064    | TUSC3 | cna | hetloss | METABRIC |
| PD10014      | TUSC3 | cna | hetloss | BASIS    |
| PD13296      | TUSC3 | cna | hetloss | BASIS    |
| PD13299      | TUSC3 | cna | hetloss | BASIS    |
| PD13771      | TUSC3 | cna | hetloss | BASIS    |
| PD14442      | TUSC3 | cna | hetloss | BASIS    |
| PD22355      | TUSC3 | cna | hetloss | BASIS    |
| PD23562      | TUSC3 | cna | hetloss | BASIS    |
| PD23578      | TUSC3 | cna | hetloss | BASIS    |
| PD24186      | TUSC3 | cna | gain    | BASIS    |
| PD24202      | TUSC3 | cna | hetloss | BASIS    |
| PD24206      | TUSC3 | cna | hetloss | BASIS    |
| PD24337      | TUSC3 | cna | hetloss | BASIS    |
| PD3905       | TUSC3 | cna | gain    | BASIS    |
| PD4005       | TUSC3 | cna | hetloss | BASIS    |
| PD4006       | TUSC3 | cna | gain    | BASIS    |
| PD4107       | TUSC3 | cna | hetloss | BASIS    |
| PD4826       | TUSC3 | cna | hetloss | BASIS    |

|              |         |     |         |          |
|--------------|---------|-----|---------|----------|
| PD6406       | TUSC3   | cna | hetloss | BASIS    |
| PD8980       | TUSC3   | cna | hetloss | BASIS    |
| PD9004       | TUSC3   | cna | gain    | BASIS    |
| TCGA-A2-A25B | VTI1A   | cna | hetloss | TCGA     |
| TCGA-AN-A0XU | VTI1A   | cna | hetloss | TCGA     |
| TCGA-AO-A0JL | VTI1A   | cna | hetloss | TCGA     |
| TCGA-BH-A18R | VTI1A   | cna | gain    | TCGA     |
| TCGA-C8-A12L | VTI1A   | cna | hetloss | TCGA     |
| TCGA-D8-A27M | VTI1A   | cna | hetloss | TCGA     |
| TCGA-E2-A1L7 | VTI1A   | cna | hetloss | TCGA     |
| TCGA-E9-A1NC | VTI1A   | cna | hetloss | TCGA     |
| TCGA-LL-A5YP | VTI1A   | cna | gain    | TCGA     |
| MB-0346      | VTI1A   | cna | hetloss | METABRIC |
| MB-2827      | VTI1A   | cna | hetloss | METABRIC |
| MB-5070      | VTI1A   | cna | hetloss | METABRIC |
| MB-5107      | VTI1A   | cna | hetloss | METABRIC |
| MB-6098      | VTI1A   | cna | hetloss | METABRIC |
| MB-7038      | VTI1A   | cna | hetloss | METABRIC |
| MB-0420      | VTI1A   | cna | hetloss | METABRIC |
| PD10014      | VTI1A   | cna | hetloss | BASIS    |
| PD11742      | VTI1A   | cna | hetloss | BASIS    |
| PD13296      | VTI1A   | cna | hetloss | BASIS    |
| PD23562      | VTI1A   | cna | gain    | BASIS    |
| PD23574      | VTI1A   | cna | gain    | BASIS    |
| PD23578      | VTI1A   | cna | hetloss | BASIS    |
| PD24206      | VTI1A   | cna | gain    | BASIS    |
| PD24337      | VTI1A   | cna | hetloss | BASIS    |
| PD3905       | VTI1A   | cna | gain    | BASIS    |
| PD4005       | VTI1A   | cna | hetloss | BASIS    |
| PD4006       | VTI1A   | cna | gain    | BASIS    |
| PD4107       | VTI1A   | cna | gain    | BASIS    |
| PD5935       | VTI1A   | cna | gain    | BASIS    |
| PD5945       | VTI1A   | cna | gain    | BASIS    |
| PD5948       | VTI1A   | cna | gain    | BASIS    |
| PD6731       | VTI1A   | cna | hetloss | BASIS    |
| PD7067       | VTI1A   | cna | gain    | BASIS    |
| PD7215       | VTI1A   | cna | gain    | BASIS    |
| PD8621       | VTI1A   | cna | gain    | BASIS    |
| PD8980       | VTI1A   | cna | hetloss | BASIS    |
| PD9585       | VTI1A   | cna | hetloss | BASIS    |
| PD9702       | VTI1A   | cna | gain    | BASIS    |
| TCGA-A2-A25B | WHSC1L1 | cna | gain    | TCGA     |
| TCGA-AN-A0XU | WHSC1L1 | cna | hetloss | TCGA     |
| TCGA-AO-A0JL | WHSC1L1 | cna | gain    | TCGA     |
| TCGA-BH-A0C0 | WHSC1L1 | cna | hetloss | TCGA     |
| TCGA-BH-A1FU | WHSC1L1 | cna | homdel  | TCGA     |
| TCGA-D8-A27M | WHSC1L1 | cna | hetloss | TCGA     |

|              |         |     |         |          |
|--------------|---------|-----|---------|----------|
| TCGA-E2-A1L7 | WHSC1L1 | cna | hetloss | TCGA     |
| TCGA-LL-A5YP | WHSC1L1 | cna | hetloss | TCGA     |
| MB-0346      | WHSC1L1 | cna | hetloss | METABRIC |
| MB-5465      | WHSC1L1 | cna | hetloss | METABRIC |
| MB-6060      | WHSC1L1 | cna | gain    | METABRIC |
| MB-7038      | WHSC1L1 | cna | hetloss | METABRIC |
| MB-0420      | WHSC1L1 | cna | hetloss | METABRIC |
| PD10014      | WHSC1L1 | cna | hetloss | BASIS    |
| PD11327      | WHSC1L1 | cna | homdel  | BASIS    |
| PD13296      | WHSC1L1 | cna | hetloss | BASIS    |
| PD13299      | WHSC1L1 | cna | gain    | BASIS    |
| PD13771      | WHSC1L1 | cna | hetloss | BASIS    |
| PD14442      | WHSC1L1 | cna | hetloss | BASIS    |
| PD23562      | WHSC1L1 | cna | gain    | BASIS    |
| PD23578      | WHSC1L1 | cna | hetloss | BASIS    |
| PD24186      | WHSC1L1 | cna | gain    | BASIS    |
| PD24202      | WHSC1L1 | cna | hetloss | BASIS    |
| PD24206      | WHSC1L1 | cna | amp     | BASIS    |
| PD24337      | WHSC1L1 | cna | hetloss | BASIS    |
| PD3905       | WHSC1L1 | cna | gain    | BASIS    |
| PD4006       | WHSC1L1 | cna | gain    | BASIS    |
| PD4107       | WHSC1L1 | cna | gain    | BASIS    |
| PD4826       | WHSC1L1 | cna | hetloss | BASIS    |
| PD5930       | WHSC1L1 | cna | gain    | BASIS    |
| PD5935       | WHSC1L1 | cna | gain    | BASIS    |
| PD5945       | WHSC1L1 | cna | gain    | BASIS    |
| PD7067       | WHSC1L1 | cna | gain    | BASIS    |
| PD7215       | WHSC1L1 | cna | amp     | BASIS    |
| PD8980       | WHSC1L1 | cna | amp     | BASIS    |
| PD9004       | WHSC1L1 | cna | gain    | BASIS    |
| PD9585       | WHSC1L1 | cna | hetloss | BASIS    |
| PD9702       | WHSC1L1 | cna | gain    | BASIS    |
| TCGA-A2-A25B | WRN     | cna | hetloss | TCGA     |
| TCGA-AN-A0XU | WRN     | cna | hetloss | TCGA     |
| TCGA-AO-A0JL | WRN     | cna | hetloss | TCGA     |
| TCGA-BH-A0C0 | WRN     | cna | hetloss | TCGA     |
| TCGA-BH-A1FU | WRN     | cna | homdel  | TCGA     |
| TCGA-C8-A12L | WRN     | cna | hetloss | TCGA     |
| TCGA-D8-A27M | WRN     | cna | hetloss | TCGA     |
| TCGA-E2-A1L7 | WRN     | cna | hetloss | TCGA     |
| TCGA-LL-A5YP | WRN     | cna | hetloss | TCGA     |
| MB-0346      | WRN     | cna | hetloss | METABRIC |
| MB-2827      | WRN     | cna | hetloss | METABRIC |
| MB-5465      | WRN     | cna | hetloss | METABRIC |
| MB-6060      | WRN     | cna | hetloss | METABRIC |
| MB-7038      | WRN     | cna | hetloss | METABRIC |
| MB-0420      | WRN     | cna | hetloss | METABRIC |

|              |      |     |         |          |
|--------------|------|-----|---------|----------|
| PD10014      | WRN  | cna | hetloss | BASIS    |
| PD11327      | WRN  | cna | homdel  | BASIS    |
| PD13296      | WRN  | cna | hetloss | BASIS    |
| PD13299      | WRN  | cna | gain    | BASIS    |
| PD13771      | WRN  | cna | hetloss | BASIS    |
| PD14442      | WRN  | cna | hetloss | BASIS    |
| PD22355      | WRN  | cna | hetloss | BASIS    |
| PD23562      | WRN  | cna | hetloss | BASIS    |
| PD23574      | WRN  | cna | hetloss | BASIS    |
| PD23578      | WRN  | cna | hetloss | BASIS    |
| PD24186      | WRN  | cna | gain    | BASIS    |
| PD24202      | WRN  | cna | hetloss | BASIS    |
| PD24206      | WRN  | cna | gain    | BASIS    |
| PD24337      | WRN  | cna | hetloss | BASIS    |
| PD3905       | WRN  | cna | gain    | BASIS    |
| PD4005       | WRN  | cna | hetloss | BASIS    |
| PD4826       | WRN  | cna | hetloss | BASIS    |
| PD5935       | WRN  | cna | gain    | BASIS    |
| PD5945       | WRN  | cna | gain    | BASIS    |
| PD6413       | WRN  | cna | gain    | BASIS    |
| PD7067       | WRN  | cna | hetloss | BASIS    |
| PD9004       | WRN  | cna | gain    | BASIS    |
| PD9585       | WRN  | cna | hetloss | BASIS    |
| TCGA-A2-A25B | XPO1 | cna | hetloss | TCGA     |
| TCGA-AN-A0XU | XPO1 | cna | gain    | TCGA     |
| TCGA-AO-A0JL | XPO1 | cna | gain    | TCGA     |
| TCGA-BH-A0AW | XPO1 | cna | gain    | TCGA     |
| TCGA-BH-A0C0 | XPO1 | cna | gain    | TCGA     |
| TCGA-D8-A27M | XPO1 | cna | gain    | TCGA     |
| TCGA-E9-A1NC | XPO1 | cna | gain    | TCGA     |
| TCGA-LL-A5YP | XPO1 | cna | amp     | TCGA     |
| MB-2827      | XPO1 | cna | hetloss | METABRIC |
| MB-5465      | XPO1 | cna | amp     | METABRIC |
| MB-6271      | XPO1 | cna | hetloss | METABRIC |
| MB-7038      | XPO1 | cna | gain    | METABRIC |
| MB-7048      | XPO1 | cna | hetloss | METABRIC |
| PD10014      | XPO1 | cna | gain    | BASIS    |
| PD11327      | XPO1 | cna | hetloss | BASIS    |
| PD13296      | XPO1 | cna | gain    | BASIS    |
| PD13297      | XPO1 | cna | gain    | BASIS    |
| PD13299      | XPO1 | cna | gain    | BASIS    |
| PD22355      | XPO1 | cna | gain    | BASIS    |
| PD23562      | XPO1 | cna | gain    | BASIS    |
| PD23578      | XPO1 | cna | gain    | BASIS    |
| PD24186      | XPO1 | cna | gain    | BASIS    |
| PD24202      | XPO1 | cna | gain    | BASIS    |
| PD24206      | XPO1 | cna | hetloss | BASIS    |

|              |       |     |         |          |
|--------------|-------|-----|---------|----------|
| PD3890       | XPO1  | cna | hetloss | BASIS    |
| PD3905       | XPO1  | cna | gain    | BASIS    |
| PD4006       | XPO1  | cna | amp     | BASIS    |
| PD4107       | XPO1  | cna | gain    | BASIS    |
| PD4967       | XPO1  | cna | hetloss | BASIS    |
| PD5930       | XPO1  | cna | gain    | BASIS    |
| PD5935       | XPO1  | cna | gain    | BASIS    |
| PD5945       | XPO1  | cna | amp     | BASIS    |
| PD5948       | XPO1  | cna | gain    | BASIS    |
| PD7067       | XPO1  | cna | gain    | BASIS    |
| PD7215       | XPO1  | cna | gain    | BASIS    |
| PD8621       | XPO1  | cna | gain    | BASIS    |
| PD9004       | XPO1  | cna | gain    | BASIS    |
| PD9702       | XPO1  | cna | gain    | BASIS    |
| TCGA-A2-A25B | YWHAE | cna | hetloss | TCGA     |
| TCGA-AN-A0XU | YWHAE | cna | hetloss | TCGA     |
| TCGA-AO-A0JL | YWHAE | cna | hetloss | TCGA     |
| TCGA-BH-A0AW | YWHAE | cna | hetloss | TCGA     |
| TCGA-BH-A0C0 | YWHAE | cna | hetloss | TCGA     |
| TCGA-C8-A12L | YWHAE | cna | hetloss | TCGA     |
| TCGA-D8-A27M | YWHAE | cna | hetloss | TCGA     |
| TCGA-E2-A1L7 | YWHAE | cna | hetloss | TCGA     |
| TCGA-E9-A1NC | YWHAE | cna | hetloss | TCGA     |
| TCGA-EW-A10X | YWHAE | cna | hetloss | TCGA     |
| TCGA-LL-A5YP | YWHAE | cna | hetloss | TCGA     |
| MB-0346      | YWHAE | cna | hetloss | METABRIC |
| MB-2827      | YWHAE | cna | hetloss | METABRIC |
| MB-5107      | YWHAE | cna | hetloss | METABRIC |
| MB-6098      | YWHAE | cna | gain    | METABRIC |
| MB-6271      | YWHAE | cna | hetloss | METABRIC |
| MB-7032      | YWHAE | cna | gain    | METABRIC |
| MB-7048      | YWHAE | cna | hetloss | METABRIC |
| MB-0420      | YWHAE | cna | hetloss | METABRIC |
| PD10014      | YWHAE | cna | hetloss | BASIS    |
| PD11742      | YWHAE | cna | hetloss | BASIS    |
| PD13296      | YWHAE | cna | hetloss | BASIS    |
| PD13771      | YWHAE | cna | hetloss | BASIS    |
| PD24202      | YWHAE | cna | hetloss | BASIS    |
| PD24206      | YWHAE | cna | hetloss | BASIS    |
| PD24337      | YWHAE | cna | hetloss | BASIS    |
| PD3890       | YWHAE | cna | hetloss | BASIS    |
| PD3905       | YWHAE | cna | gain    | BASIS    |
| PD4005       | YWHAE | cna | hetloss | BASIS    |
| PD4826       | YWHAE | cna | hetloss | BASIS    |
| PD4967       | YWHAE | cna | hetloss | BASIS    |
| PD5945       | YWHAE | cna | gain    | BASIS    |
| PD6406       | YWHAE | cna | hetloss | BASIS    |

|              |        |     |         |          |
|--------------|--------|-----|---------|----------|
| PD6413       | YWHAE  | cna | hetloss | BASIS    |
| PD6731       | YWHAE  | cna | hetloss | BASIS    |
| PD7067       | YWHAE  | cna | gain    | BASIS    |
| PD9585       | YWHAE  | cna | hetloss | BASIS    |
| PD9702       | YWHAE  | cna | gain    | BASIS    |
| TCGA-AN-A0XU | ZMYM2  | cna | hetloss | TCGA     |
| TCGA-AO-A0JL | ZMYM2  | cna | hetloss | TCGA     |
| TCGA-BH-A0AW | ZMYM2  | cna | hetloss | TCGA     |
| TCGA-BH-A0C0 | ZMYM2  | cna | hetloss | TCGA     |
| TCGA-BH-A1FU | ZMYM2  | cna | hetloss | TCGA     |
| TCGA-C8-A12L | ZMYM2  | cna | hetloss | TCGA     |
| TCGA-D8-A27M | ZMYM2  | cna | hetloss | TCGA     |
| TCGA-E2-A1L7 | ZMYM2  | cna | hetloss | TCGA     |
| TCGA-E9-A1NC | ZMYM2  | cna | hetloss | TCGA     |
| TCGA-EW-A10X | ZMYM2  | cna | homdel  | TCGA     |
| TCGA-LL-A5YP | ZMYM2  | cna | gain    | TCGA     |
| MB-0346      | ZMYM2  | cna | hetloss | METABRIC |
| MB-2827      | ZMYM2  | cna | hetloss | METABRIC |
| MB-6098      | ZMYM2  | cna | hetloss | METABRIC |
| MTS-T0064    | ZMYM2  | cna | hetloss | METABRIC |
| PD10014      | ZMYM2  | cna | hetloss | BASIS    |
| PD11327      | ZMYM2  | cna | hetloss | BASIS    |
| PD13296      | ZMYM2  | cna | hetloss | BASIS    |
| PD13297      | ZMYM2  | cna | hetloss | BASIS    |
| PD13771      | ZMYM2  | cna | hetloss | BASIS    |
| PD14442      | ZMYM2  | cna | hetloss | BASIS    |
| PD22355      | ZMYM2  | cna | hetloss | BASIS    |
| PD24202      | ZMYM2  | cna | hetloss | BASIS    |
| PD24206      | ZMYM2  | cna | gain    | BASIS    |
| PD24337      | ZMYM2  | cna | hetloss | BASIS    |
| PD3890       | ZMYM2  | cna | hetloss | BASIS    |
| PD3905       | ZMYM2  | cna | gain    | BASIS    |
| PD4005       | ZMYM2  | cna | hetloss | BASIS    |
| PD4006       | ZMYM2  | cna | gain    | BASIS    |
| PD4107       | ZMYM2  | cna | gain    | BASIS    |
| PD4826       | ZMYM2  | cna | hetloss | BASIS    |
| PD4967       | ZMYM2  | cna | hetloss | BASIS    |
| PD5945       | ZMYM2  | cna | amp     | BASIS    |
| PD6413       | ZMYM2  | cna | hetloss | BASIS    |
| PD7067       | ZMYM2  | cna | gain    | BASIS    |
| PD8980       | ZMYM2  | cna | hetloss | BASIS    |
| PD9585       | ZMYM2  | cna | gain    | BASIS    |
| PD9702       | ZMYM2  | cna | gain    | BASIS    |
| TCGA-A2-A25B | ZNF703 | cna | hetloss | TCGA     |
| TCGA-AN-A0XU | ZNF703 | cna | hetloss | TCGA     |
| TCGA-AO-A0JL | ZNF703 | cna | gain    | TCGA     |
| TCGA-BH-A0C0 | ZNF703 | cna | hetloss | TCGA     |

|              |        |     |         |          |
|--------------|--------|-----|---------|----------|
| TCGA-BH-A1FU | ZNF703 | cna | homdel  | TCGA     |
| TCGA-D8-A27M | ZNF703 | cna | hetloss | TCGA     |
| TCGA-E2-A1L7 | ZNF703 | cna | hetloss | TCGA     |
| TCGA-LL-A5YP | ZNF703 | cna | hetloss | TCGA     |
| MB-0346      | ZNF703 | cna | gain    | METABRIC |
| MB-5465      | ZNF703 | cna | hetloss | METABRIC |
| MB-6060      | ZNF703 | cna | gain    | METABRIC |
| MB-7038      | ZNF703 | cna | hetloss | METABRIC |
| MB-0420      | ZNF703 | cna | hetloss | METABRIC |
| PD10014      | ZNF703 | cna | hetloss | BASIS    |
| PD11327      | ZNF703 | cna | homdel  | BASIS    |
| PD13296      | ZNF703 | cna | hetloss | BASIS    |
| PD13299      | ZNF703 | cna | gain    | BASIS    |
| PD13771      | ZNF703 | cna | hetloss | BASIS    |
| PD14442      | ZNF703 | cna | hetloss | BASIS    |
| PD22355      | ZNF703 | cna | hetloss | BASIS    |
| PD23562      | ZNF703 | cna | gain    | BASIS    |
| PD23578      | ZNF703 | cna | hetloss | BASIS    |
| PD24186      | ZNF703 | cna | gain    | BASIS    |
| PD24202      | ZNF703 | cna | hetloss | BASIS    |
| PD24206      | ZNF703 | cna | amp     | BASIS    |
| PD24337      | ZNF703 | cna | hetloss | BASIS    |
| PD3905       | ZNF703 | cna | gain    | BASIS    |
| PD4006       | ZNF703 | cna | gain    | BASIS    |
| PD4107       | ZNF703 | cna | gain    | BASIS    |
| PD4826       | ZNF703 | cna | hetloss | BASIS    |
| PD5935       | ZNF703 | cna | gain    | BASIS    |
| PD5945       | ZNF703 | cna | gain    | BASIS    |
| PD7067       | ZNF703 | cna | gain    | BASIS    |
| PD7215       | ZNF703 | cna | amp     | BASIS    |
| PD8980       | ZNF703 | cna | amp     | BASIS    |
| PD9004       | ZNF703 | cna | gain    | BASIS    |
| PD9585       | ZNF703 | cna | hetloss | BASIS    |
| PD9702       | ZNF703 | cna | gain    | BASIS    |
| TCGA-A2-A25B | SEPT9  | cna | gain    | TCGA     |
| TCGA-AN-A0XU | SEPT9  | cna | amp     | TCGA     |
| TCGA-AO-A0JL | SEPT9  | cna | hetloss | TCGA     |
| TCGA-BH-A0AW | SEPT9  | cna | amp     | TCGA     |
| TCGA-BH-A0C0 | SEPT9  | cna | gain    | TCGA     |
| TCGA-BH-A18R | SEPT9  | cna | amp     | TCGA     |
| TCGA-C8-A12L | SEPT9  | cna | gain    | TCGA     |
| TCGA-D8-A27M | SEPT9  | cna | gain    | TCGA     |
| TCGA-E2-A1L7 | SEPT9  | cna | gain    | TCGA     |
| TCGA-EW-A10X | SEPT9  | cna | amp     | TCGA     |
| TCGA-LL-A5YP | SEPT9  | cna | amp     | TCGA     |
| PD10014      | SEPT9  | cna | gain    | BASIS    |
| PD11327      | SEPT9  | cna | amp     | BASIS    |

|              |       |     |         |          |
|--------------|-------|-----|---------|----------|
| PD22355      | SEPT9 | cna | hetloss | BASIS    |
| PD23561      | SEPT9 | cna | hetloss | BASIS    |
| PD23574      | SEPT9 | cna | gain    | BASIS    |
| PD24186      | SEPT9 | cna | amp     | BASIS    |
| PD24202      | SEPT9 | cna | gain    | BASIS    |
| PD24206      | SEPT9 | cna | hetloss | BASIS    |
| PD24337      | SEPT9 | cna | gain    | BASIS    |
| PD3890       | SEPT9 | cna | gain    | BASIS    |
| PD3905       | SEPT9 | cna | gain    | BASIS    |
| PD4006       | SEPT9 | cna | gain    | BASIS    |
| PD4107       | SEPT9 | cna | gain    | BASIS    |
| PD4826       | SEPT9 | cna | amp     | BASIS    |
| PD4967       | SEPT9 | cna | hetloss | BASIS    |
| PD5930       | SEPT9 | cna | gain    | BASIS    |
| PD5935       | SEPT9 | cna | gain    | BASIS    |
| PD5945       | SEPT9 | cna | amp     | BASIS    |
| PD5948       | SEPT9 | cna | gain    | BASIS    |
| PD6731       | SEPT9 | cna | hetloss | BASIS    |
| PD7067       | SEPT9 | cna | gain    | BASIS    |
| PD7215       | SEPT9 | cna | gain    | BASIS    |
| PD8621       | SEPT9 | cna | gain    | BASIS    |
| PD9004       | SEPT9 | cna | gain    | BASIS    |
| PD9585       | SEPT9 | cna | gain    | BASIS    |
| PD9702       | SEPT9 | cna | gain    | BASIS    |
| TCGA-A2-A25B | ABCG4 | cna | hetloss | TCGA     |
| TCGA-AO-A0JL | ABCG4 | cna | hetloss | TCGA     |
| TCGA-BH-A0C0 | ABCG4 | cna | hetloss | TCGA     |
| TCGA-BH-A18R | ABCG4 | cna | homdel  | TCGA     |
| TCGA-D8-A27M | ABCG4 | cna | hetloss | TCGA     |
| TCGA-E2-A1L7 | ABCG4 | cna | hetloss | TCGA     |
| TCGA-E9-A1NC | ABCG4 | cna | hetloss | TCGA     |
| TCGA-EW-A10X | ABCG4 | cna | homdel  | TCGA     |
| TCGA-LL-A5YP | ABCG4 | cna | hetloss | TCGA     |
| MB-0346      | ABCG4 | cna | hetloss | METABRIC |
| MB-5070      | ABCG4 | cna | hetloss | METABRIC |
| MB-5107      | ABCG4 | cna | hetloss | METABRIC |
| MB-6271      | ABCG4 | cna | hetloss | METABRIC |
| MB-7032      | ABCG4 | cna | hetloss | METABRIC |
| MB-7048      | ABCG4 | cna | hetloss | METABRIC |
| PD11742      | ABCG4 | cna | hetloss | BASIS    |
| PD13296      | ABCG4 | cna | hetloss | BASIS    |
| PD13297      | ABCG4 | cna | hetloss | BASIS    |
| PD13771      | ABCG4 | cna | hetloss | BASIS    |
| PD22355      | ABCG4 | cna | hetloss | BASIS    |
| PD23574      | ABCG4 | cna | gain    | BASIS    |
| PD23578      | ABCG4 | cna | hetloss | BASIS    |
| PD24186      | ABCG4 | cna | gain    | BASIS    |



|              |         |     |         |          |
|--------------|---------|-----|---------|----------|
| PD24206      | ABCG4   | cna | gain    | BASIS    |
| PD24337      | ABCG4   | cna | hetloss | BASIS    |
| PD3905       | ABCG4   | cna | gain    | BASIS    |
| PD4005       | ABCG4   | cna | hetloss | BASIS    |
| PD4826       | ABCG4   | cna | hetloss | BASIS    |
| PD5935       | ABCG4   | cna | gain    | BASIS    |
| PD5945       | ABCG4   | cna | gain    | BASIS    |
| PD5948       | ABCG4   | cna | gain    | BASIS    |
| PD6413       | ABCG4   | cna | hetloss | BASIS    |
| PD6731       | ABCG4   | cna | hetloss | BASIS    |
| PD7067       | ABCG4   | cna | gain    | BASIS    |
| PD7215       | ABCG4   | cna | gain    | BASIS    |
| PD9004       | ABCG4   | cna | hetloss | BASIS    |
| PD9702       | ABCG4   | cna | gain    | BASIS    |
| TCGA-AN-A0XU | ANKRD12 | cna | hetloss | TCGA     |
| TCGA-AO-A0JL | ANKRD12 | cna | gain    | TCGA     |
| TCGA-BH-A0AW | ANKRD12 | cna | amp     | TCGA     |
| TCGA-BH-A0C0 | ANKRD12 | cna | hetloss | TCGA     |
| TCGA-BH-A1FU | ANKRD12 | cna | gain    | TCGA     |
| TCGA-C8-A12L | ANKRD12 | cna | gain    | TCGA     |
| TCGA-D8-A27M | ANKRD12 | cna | hetloss | TCGA     |
| TCGA-LL-A5YP | ANKRD12 | cna | gain    | TCGA     |
| MB-0346      | ANKRD12 | cna | gain    | METABRIC |
| MB-5107      | ANKRD12 | cna | hetloss | METABRIC |
| MB-5465      | ANKRD12 | cna | hetloss | METABRIC |
| MB-6098      | ANKRD12 | cna | hetloss | METABRIC |
| MB-0420      | ANKRD12 | cna | gain    | METABRIC |
| PD11742      | ANKRD12 | cna | hetloss | BASIS    |
| PD13296      | ANKRD12 | cna | hetloss | BASIS    |
| PD13299      | ANKRD12 | cna | gain    | BASIS    |
| PD23574      | ANKRD12 | cna | gain    | BASIS    |
| PD24186      | ANKRD12 | cna | gain    | BASIS    |
| PD24206      | ANKRD12 | cna | gain    | BASIS    |
| PD24337      | ANKRD12 | cna | hetloss | BASIS    |
| PD3890       | ANKRD12 | cna | hetloss | BASIS    |
| PD3905       | ANKRD12 | cna | gain    | BASIS    |
| PD4005       | ANKRD12 | cna | hetloss | BASIS    |
| PD4006       | ANKRD12 | cna | gain    | BASIS    |
| PD4107       | ANKRD12 | cna | gain    | BASIS    |
| PD4967       | ANKRD12 | cna | hetloss | BASIS    |
| PD5930       | ANKRD12 | cna | gain    | BASIS    |
| PD5935       | ANKRD12 | cna | gain    | BASIS    |
| PD5945       | ANKRD12 | cna | amp     | BASIS    |
| PD5948       | ANKRD12 | cna | gain    | BASIS    |
| PD7067       | ANKRD12 | cna | gain    | BASIS    |
| PD7215       | ANKRD12 | cna | gain    | BASIS    |
| PD8621       | ANKRD12 | cna | gain    | BASIS    |

|              |         |     |         |          |
|--------------|---------|-----|---------|----------|
| PD8980       | ANKRD12 | cna | hetloss | BASIS    |
| PD9004       | ANKRD12 | cna | gain    | BASIS    |
| PD9585       | ANKRD12 | cna | hetloss | BASIS    |
| PD9702       | ANKRD12 | cna | gain    | BASIS    |
| TCGA-A2-A25B | AR      | cna | gain    | TCGA     |
| TCGA-AN-A0XU | AR      | cna | hetloss | TCGA     |
| TCGA-AO-A0JL | AR      | cna | gain    | TCGA     |
| TCGA-BH-A0AW | AR      | cna | gain    | TCGA     |
| TCGA-C8-A12L | AR      | cna | amp     | TCGA     |
| TCGA-E2-A1L7 | AR      | cna | hetloss | TCGA     |
| TCGA-E9-A1NC | AR      | cna | hetloss | TCGA     |
| MB-0346      | AR      | cna | amp     | METABRIC |
| MB-5465      | AR      | cna | gain    | METABRIC |
| MB-6060      | AR      | cna | hetloss | METABRIC |
| MB-0420      | AR      | cna | hetloss | METABRIC |
| PD10014      | AR      | cna | hetloss | BASIS    |
| PD11327      | AR      | cna | hetloss | BASIS    |
| PD13296      | AR      | cna | gain    | BASIS    |
| PD13299      | AR      | cna | gain    | BASIS    |
| PD13771      | AR      | cna | gain    | BASIS    |
| PD14442      | AR      | cna | gain    | BASIS    |
| PD23562      | AR      | cna | hetloss | BASIS    |
| PD23574      | AR      | cna | gain    | BASIS    |
| PD24206      | AR      | cna | gain    | BASIS    |
| PD3890       | AR      | cna | gain    | BASIS    |
| PD3905       | AR      | cna | gain    | BASIS    |
| PD4005       | AR      | cna | hetloss | BASIS    |
| PD4107       | AR      | cna | gain    | BASIS    |
| PD4826       | AR      | cna | gain    | BASIS    |
| PD4967       | AR      | cna | gain    | BASIS    |
| PD5930       | AR      | cna | gain    | BASIS    |
| PD5935       | AR      | cna | gain    | BASIS    |
| PD5945       | AR      | cna | gain    | BASIS    |
| PD5948       | AR      | cna | gain    | BASIS    |
| PD6406       | AR      | cna | gain    | BASIS    |
| PD6413       | AR      | cna | gain    | BASIS    |
| PD7067       | AR      | cna | homdel  | BASIS    |
| PD7215       | AR      | cna | gain    | BASIS    |
| PD8621       | AR      | cna | gain    | BASIS    |
| PD8980       | AR      | cna | gain    | BASIS    |
| PD9004       | AR      | cna | gain    | BASIS    |
| TCGA-A2-A25B | ARID2   | cna | gain    | TCGA     |
| TCGA-AN-A0XU | ARID2   | cna | gain    | TCGA     |
| TCGA-AO-A0JL | ARID2   | cna | hetloss | TCGA     |
| TCGA-BH-A0C0 | ARID2   | cna | hetloss | TCGA     |
| TCGA-BH-A18R | ARID2   | cna | gain    | TCGA     |
| TCGA-BH-A1FU | ARID2   | cna | hetloss | TCGA     |

|              |       |     |         |          |
|--------------|-------|-----|---------|----------|
| TCGA-C8-A12L | ARID2 | cna | gain    | TCGA     |
| TCGA-D8-A27M | ARID2 | cna | hetloss | TCGA     |
| TCGA-E2-A1L7 | ARID2 | cna | hetloss | TCGA     |
| TCGA-E9-A1NC | ARID2 | cna | hetloss | TCGA     |
| TCGA-LL-A5YP | ARID2 | cna | hetloss | TCGA     |
| MB-0346      | ARID2 | cna | gain    | METABRIC |
| MB-2827      | ARID2 | cna | hetloss | METABRIC |
| MB-5070      | ARID2 | cna | hetloss | METABRIC |
| MB-6098      | ARID2 | cna | hetloss | METABRIC |
| MB-0420      | ARID2 | cna | hetloss | METABRIC |
| PD11327      | ARID2 | cna | amp     | BASIS    |
| PD13296      | ARID2 | cna | hetloss | BASIS    |
| PD13297      | ARID2 | cna | hetloss | BASIS    |
| PD23574      | ARID2 | cna | gain    | BASIS    |
| PD23578      | ARID2 | cna | gain    | BASIS    |
| PD24186      | ARID2 | cna | gain    | BASIS    |
| PD24202      | ARID2 | cna | hetloss | BASIS    |
| PD24206      | ARID2 | cna | gain    | BASIS    |
| PD24337      | ARID2 | cna | hetloss | BASIS    |
| PD3890       | ARID2 | cna | hetloss | BASIS    |
| PD3905       | ARID2 | cna | gain    | BASIS    |
| PD4005       | ARID2 | cna | hetloss | BASIS    |
| PD4006       | ARID2 | cna | gain    | BASIS    |
| PD4107       | ARID2 | cna | hetloss | BASIS    |
| PD4826       | ARID2 | cna | gain    | BASIS    |
| PD5945       | ARID2 | cna | gain    | BASIS    |
| PD5948       | ARID2 | cna | hetloss | BASIS    |
| PD6731       | ARID2 | cna | hetloss | BASIS    |
| PD7067       | ARID2 | cna | gain    | BASIS    |
| PD9585       | ARID2 | cna | hetloss | BASIS    |
| PD9702       | ARID2 | cna | gain    | BASIS    |
| TCGA-A2-A25B | ASH2L | cna | hetloss | TCGA     |
| TCGA-AN-A0XU | ASH2L | cna | hetloss | TCGA     |
| TCGA-AO-A0JL | ASH2L | cna | gain    | TCGA     |
| TCGA-BH-A0C0 | ASH2L | cna | hetloss | TCGA     |
| TCGA-BH-A1FU | ASH2L | cna | homdel  | TCGA     |
| TCGA-D8-A27M | ASH2L | cna | hetloss | TCGA     |
| TCGA-E2-A1L7 | ASH2L | cna | hetloss | TCGA     |
| TCGA-LL-A5YP | ASH2L | cna | hetloss | TCGA     |
| MB-0346      | ASH2L | cna | hetloss | METABRIC |
| MB-5465      | ASH2L | cna | hetloss | METABRIC |
| MB-6060      | ASH2L | cna | gain    | METABRIC |
| MB-7038      | ASH2L | cna | hetloss | METABRIC |
| MB-0420      | ASH2L | cna | hetloss | METABRIC |
| PD10014      | ASH2L | cna | hetloss | BASIS    |
| PD11327      | ASH2L | cna | homdel  | BASIS    |
| PD13296      | ASH2L | cna | hetloss | BASIS    |

|              |       |     |         |          |
|--------------|-------|-----|---------|----------|
| PD13299      | ASH2L | cna | gain    | BASIS    |
| PD13771      | ASH2L | cna | hetloss | BASIS    |
| PD14442      | ASH2L | cna | hetloss | BASIS    |
| PD23562      | ASH2L | cna | gain    | BASIS    |
| PD23578      | ASH2L | cna | hetloss | BASIS    |
| PD24186      | ASH2L | cna | gain    | BASIS    |
| PD24202      | ASH2L | cna | hetloss | BASIS    |
| PD24206      | ASH2L | cna | amp     | BASIS    |
| PD24337      | ASH2L | cna | hetloss | BASIS    |
| PD3905       | ASH2L | cna | gain    | BASIS    |
| PD4006       | ASH2L | cna | gain    | BASIS    |
| PD4107       | ASH2L | cna | gain    | BASIS    |
| PD4826       | ASH2L | cna | hetloss | BASIS    |
| PD5935       | ASH2L | cna | gain    | BASIS    |
| PD5945       | ASH2L | cna | gain    | BASIS    |
| PD7067       | ASH2L | cna | gain    | BASIS    |
| PD7215       | ASH2L | cna | amp     | BASIS    |
| PD8980       | ASH2L | cna | amp     | BASIS    |
| PD9004       | ASH2L | cna | gain    | BASIS    |
| PD9585       | ASH2L | cna | hetloss | BASIS    |
| PD9702       | ASH2L | cna | gain    | BASIS    |
| TCGA-A2-A25B | ATF1  | cna | gain    | TCGA     |
| TCGA-AN-A0XU | ATF1  | cna | gain    | TCGA     |
| TCGA-AO-A0JL | ATF1  | cna | hetloss | TCGA     |
| TCGA-BH-A18R | ATF1  | cna | gain    | TCGA     |
| TCGA-BH-A1FU | ATF1  | cna | hetloss | TCGA     |
| TCGA-C8-A12L | ATF1  | cna | gain    | TCGA     |
| TCGA-D8-A27M | ATF1  | cna | hetloss | TCGA     |
| TCGA-E2-A1L7 | ATF1  | cna | hetloss | TCGA     |
| TCGA-E9-A1NC | ATF1  | cna | hetloss | TCGA     |
| TCGA-LL-A5YP | ATF1  | cna | hetloss | TCGA     |
| MB-0346      | ATF1  | cna | gain    | METABRIC |
| MB-2827      | ATF1  | cna | hetloss | METABRIC |
| MB-5070      | ATF1  | cna | hetloss | METABRIC |
| MB-5465      | ATF1  | cna | gain    | METABRIC |
| MB-6098      | ATF1  | cna | hetloss | METABRIC |
| MB-7038      | ATF1  | cna | hetloss | METABRIC |
| MB-7048      | ATF1  | cna | hetloss | METABRIC |
| MB-0420      | ATF1  | cna | homdel  | METABRIC |
| PD11327      | ATF1  | cna | hetloss | BASIS    |
| PD13296      | ATF1  | cna | hetloss | BASIS    |
| PD13297      | ATF1  | cna | hetloss | BASIS    |
| PD13299      | ATF1  | cna | gain    | BASIS    |
| PD23578      | ATF1  | cna | hetloss | BASIS    |
| PD24202      | ATF1  | cna | hetloss | BASIS    |
| PD24206      | ATF1  | cna | gain    | BASIS    |
| PD24337      | ATF1  | cna | hetloss | BASIS    |

|              |      |     |         |          |
|--------------|------|-----|---------|----------|
| PD3890       | ATF1 | cna | hetloss | BASIS    |
| PD3905       | ATF1 | cna | gain    | BASIS    |
| PD4107       | ATF1 | cna | hetloss | BASIS    |
| PD4826       | ATF1 | cna | gain    | BASIS    |
| PD5945       | ATF1 | cna | gain    | BASIS    |
| PD6413       | ATF1 | cna | hetloss | BASIS    |
| PD6731       | ATF1 | cna | hetloss | BASIS    |
| PD7067       | ATF1 | cna | gain    | BASIS    |
| PD8621       | ATF1 | cna | gain    | BASIS    |
| PD9585       | ATF1 | cna | hetloss | BASIS    |
| PD9702       | ATF1 | cna | gain    | BASIS    |
| TCGA-A2-A25B | BCL2 | cna | hetloss | TCGA     |
| TCGA-AO-A0JL | BCL2 | cna | gain    | TCGA     |
| TCGA-BH-A0AW | BCL2 | cna | hetloss | TCGA     |
| TCGA-BH-A0C0 | BCL2 | cna | gain    | TCGA     |
| TCGA-C8-A12L | BCL2 | cna | gain    | TCGA     |
| TCGA-D8-A27M | BCL2 | cna | hetloss | TCGA     |
| TCGA-E2-A1L7 | BCL2 | cna | gain    | TCGA     |
| TCGA-LL-A5YP | BCL2 | cna | hetloss | TCGA     |
| MB-0346      | BCL2 | cna | hetloss | METABRIC |
| MB-0420      | BCL2 | cna | hetloss | METABRIC |
| MTS-T0064    | BCL2 | cna | hetloss | METABRIC |
| PD10014      | BCL2 | cna | hetloss | BASIS    |
| PD11742      | BCL2 | cna | hetloss | BASIS    |
| PD13296      | BCL2 | cna | hetloss | BASIS    |
| PD13297      | BCL2 | cna | gain    | BASIS    |
| PD13299      | BCL2 | cna | gain    | BASIS    |
| PD22355      | BCL2 | cna | hetloss | BASIS    |
| PD23574      | BCL2 | cna | hetloss | BASIS    |
| PD23578      | BCL2 | cna | hetloss | BASIS    |
| PD24186      | BCL2 | cna | gain    | BASIS    |
| PD24202      | BCL2 | cna | hetloss | BASIS    |
| PD24206      | BCL2 | cna | hetloss | BASIS    |
| PD24337      | BCL2 | cna | gain    | BASIS    |
| PD3905       | BCL2 | cna | gain    | BASIS    |
| PD4006       | BCL2 | cna | gain    | BASIS    |
| PD4107       | BCL2 | cna | gain    | BASIS    |
| PD4826       | BCL2 | cna | hetloss | BASIS    |
| PD4967       | BCL2 | cna | hetloss | BASIS    |
| PD5930       | BCL2 | cna | hetloss | BASIS    |
| PD5945       | BCL2 | cna | gain    | BASIS    |
| PD5948       | BCL2 | cna | gain    | BASIS    |
| PD6406       | BCL2 | cna | gain    | BASIS    |
| PD7067       | BCL2 | cna | gain    | BASIS    |
| PD8980       | BCL2 | cna | hetloss | BASIS    |
| PD9004       | BCL2 | cna | hetloss | BASIS    |
| PD9585       | BCL2 | cna | hetloss | BASIS    |

|              |        |     |         |          |
|--------------|--------|-----|---------|----------|
| PD9702       | BCL2   | cna | gain    | BASIS    |
| TCGA-A2-A25B | BCOR   | cna | gain    | TCGA     |
| TCGA-AN-A0XU | BCOR   | cna | hetloss | TCGA     |
| TCGA-AO-A0JL | BCOR   | cna | gain    | TCGA     |
| TCGA-BH-A0AW | BCOR   | cna | gain    | TCGA     |
| TCGA-E2-A1L7 | BCOR   | cna | hetloss | TCGA     |
| TCGA-E9-A1NC | BCOR   | cna | hetloss | TCGA     |
| MB-0346      | BCOR   | cna | hetloss | METABRIC |
| MB-2827      | BCOR   | cna | hetloss | METABRIC |
| MB-5070      | BCOR   | cna | hetloss | METABRIC |
| MB-5465      | BCOR   | cna | gain    | METABRIC |
| MB-6098      | BCOR   | cna | hetloss | METABRIC |
| MB-0420      | BCOR   | cna | hetloss | METABRIC |
| MTS-T0064    | BCOR   | cna | hetloss | METABRIC |
| PD10014      | BCOR   | cna | hetloss | BASIS    |
| PD11327      | BCOR   | cna | homdel  | BASIS    |
| PD13296      | BCOR   | cna | gain    | BASIS    |
| PD13299      | BCOR   | cna | amp     | BASIS    |
| PD13771      | BCOR   | cna | gain    | BASIS    |
| PD14442      | BCOR   | cna | gain    | BASIS    |
| PD23562      | BCOR   | cna | hetloss | BASIS    |
| PD23574      | BCOR   | cna | gain    | BASIS    |
| PD23578      | BCOR   | cna | hetloss | BASIS    |
| PD3905       | BCOR   | cna | gain    | BASIS    |
| PD4005       | BCOR   | cna | hetloss | BASIS    |
| PD4006       | BCOR   | cna | hetloss | BASIS    |
| PD4107       | BCOR   | cna | gain    | BASIS    |
| PD4826       | BCOR   | cna | gain    | BASIS    |
| PD4967       | BCOR   | cna | gain    | BASIS    |
| PD5935       | BCOR   | cna | gain    | BASIS    |
| PD5948       | BCOR   | cna | gain    | BASIS    |
| PD6406       | BCOR   | cna | gain    | BASIS    |
| PD6413       | BCOR   | cna | gain    | BASIS    |
| PD7215       | BCOR   | cna | gain    | BASIS    |
| PD8621       | BCOR   | cna | amp     | BASIS    |
| PD8980       | BCOR   | cna | hetloss | BASIS    |
| PD9004       | BCOR   | cna | gain    | BASIS    |
| PD9585       | BCOR   | cna | hetloss | BASIS    |
| TCGA-A2-A25B | BMPR1A | cna | hetloss | TCGA     |
| TCGA-AN-A0XU | BMPR1A | cna | hetloss | TCGA     |
| TCGA-AO-A0JL | BMPR1A | cna | gain    | TCGA     |
| TCGA-BH-A0AW | BMPR1A | cna | gain    | TCGA     |
| TCGA-BH-A18R | BMPR1A | cna | gain    | TCGA     |
| TCGA-C8-A12L | BMPR1A | cna | hetloss | TCGA     |
| TCGA-D8-A27M | BMPR1A | cna | hetloss | TCGA     |
| TCGA-E2-A1L7 | BMPR1A | cna | hetloss | TCGA     |
| MB-2827      | BMPR1A | cna | hetloss | METABRIC |

|              |        |     |         |          |
|--------------|--------|-----|---------|----------|
| MB-5070      | BMPR1A | cna | hetloss | METABRIC |
| MB-6060      | BMPR1A | cna | hetloss | METABRIC |
| MB-6098      | BMPR1A | cna | hetloss | METABRIC |
| MB-7048      | BMPR1A | cna | hetloss | METABRIC |
| MTS-T0064    | BMPR1A | cna | gain    | METABRIC |
| PD10014      | BMPR1A | cna | hetloss | BASIS    |
| PD11327      | BMPR1A | cna | hetloss | BASIS    |
| PD11742      | BMPR1A | cna | hetloss | BASIS    |
| PD13296      | BMPR1A | cna | hetloss | BASIS    |
| PD13299      | BMPR1A | cna | gain    | BASIS    |
| PD23562      | BMPR1A | cna | gain    | BASIS    |
| PD23574      | BMPR1A | cna | gain    | BASIS    |
| PD23578      | BMPR1A | cna | hetloss | BASIS    |
| PD24202      | BMPR1A | cna | hetloss | BASIS    |
| PD24206      | BMPR1A | cna | gain    | BASIS    |
| PD3890       | BMPR1A | cna | hetloss | BASIS    |
| PD3905       | BMPR1A | cna | gain    | BASIS    |
| PD4006       | BMPR1A | cna | gain    | BASIS    |
| PD4107       | BMPR1A | cna | gain    | BASIS    |
| PD5930       | BMPR1A | cna | gain    | BASIS    |
| PD5935       | BMPR1A | cna | homdel  | BASIS    |
| PD6406       | BMPR1A | cna | hetloss | BASIS    |
| PD6731       | BMPR1A | cna | hetloss | BASIS    |
| PD7215       | BMPR1A | cna | gain    | BASIS    |
| PD8980       | BMPR1A | cna | hetloss | BASIS    |
| PD9004       | BMPR1A | cna | gain    | BASIS    |
| PD9585       | BMPR1A | cna | hetloss | BASIS    |
| PD9702       | BMPR1A | cna | gain    | BASIS    |
| TCGA-A2-A25B | CBL    | cna | hetloss | TCGA     |
| TCGA-AO-A0JL | CBL    | cna | hetloss | TCGA     |
| TCGA-BH-A0C0 | CBL    | cna | hetloss | TCGA     |
| TCGA-BH-A18R | CBL    | cna | homdel  | TCGA     |
| TCGA-D8-A27M | CBL    | cna | hetloss | TCGA     |
| TCGA-E2-A1L7 | CBL    | cna | hetloss | TCGA     |
| TCGA-E9-A1NC | CBL    | cna | hetloss | TCGA     |
| TCGA-EW-A10X | CBL    | cna | homdel  | TCGA     |
| TCGA-LL-A5YP | CBL    | cna | hetloss | TCGA     |
| MB-0346      | CBL    | cna | hetloss | METABRIC |
| MB-5070      | CBL    | cna | hetloss | METABRIC |
| MB-5107      | CBL    | cna | hetloss | METABRIC |
| MB-6271      | CBL    | cna | hetloss | METABRIC |
| MB-7032      | CBL    | cna | hetloss | METABRIC |
| MB-7048      | CBL    | cna | hetloss | METABRIC |
| PD11742      | CBL    | cna | hetloss | BASIS    |
| PD13296      | CBL    | cna | hetloss | BASIS    |
| PD13297      | CBL    | cna | hetloss | BASIS    |
| PD13771      | CBL    | cna | hetloss | BASIS    |

|              |      |     |         |          |
|--------------|------|-----|---------|----------|
| PD22355      | CBL  | cna | hetloss | BASIS    |
| PD23574      | CBL  | cna | gain    | BASIS    |
| PD23578      | CBL  | cna | hetloss | BASIS    |
| PD24186      | CBL  | cna | gain    | BASIS    |
| PD24206      | CBL  | cna | gain    | BASIS    |
| PD24337      | CBL  | cna | hetloss | BASIS    |
| PD3905       | CBL  | cna | gain    | BASIS    |
| PD4005       | CBL  | cna | hetloss | BASIS    |
| PD4826       | CBL  | cna | hetloss | BASIS    |
| PD5935       | CBL  | cna | gain    | BASIS    |
| PD5945       | CBL  | cna | gain    | BASIS    |
| PD5948       | CBL  | cna | gain    | BASIS    |
| PD6413       | CBL  | cna | hetloss | BASIS    |
| PD6731       | CBL  | cna | hetloss | BASIS    |
| PD7067       | CBL  | cna | gain    | BASIS    |
| PD7215       | CBL  | cna | gain    | BASIS    |
| PD9004       | CBL  | cna | hetloss | BASIS    |
| PD9702       | CBL  | cna | gain    | BASIS    |
| TCGA-AN-A0XU | CD74 | cna | hetloss | TCGA     |
| TCGA-AO-A0JL | CD74 | cna | hetloss | TCGA     |
| TCGA-BH-A0C0 | CD74 | cna | hetloss | TCGA     |
| TCGA-BH-A18R | CD74 | cna | gain    | TCGA     |
| TCGA-BH-A1FU | CD74 | cna | hetloss | TCGA     |
| TCGA-C8-A12L | CD74 | cna | hetloss | TCGA     |
| TCGA-D8-A27M | CD74 | cna | hetloss | TCGA     |
| TCGA-E2-A1L7 | CD74 | cna | hetloss | TCGA     |
| TCGA-E9-A1NC | CD74 | cna | hetloss | TCGA     |
| TCGA-LL-A5YP | CD74 | cna | hetloss | TCGA     |
| MB-0346      | CD74 | cna | gain    | METABRIC |
| MB-5070      | CD74 | cna | hetloss | METABRIC |
| MB-5465      | CD74 | cna | hetloss | METABRIC |
| MB-6098      | CD74 | cna | hetloss | METABRIC |
| MB-7038      | CD74 | cna | hetloss | METABRIC |
| MB-0420      | CD74 | cna | hetloss | METABRIC |
| PD10014      | CD74 | cna | hetloss | BASIS    |
| PD13296      | CD74 | cna | hetloss | BASIS    |
| PD13297      | CD74 | cna | hetloss | BASIS    |
| PD13771      | CD74 | cna | gain    | BASIS    |
| PD22355      | CD74 | cna | hetloss | BASIS    |
| PD23578      | CD74 | cna | hetloss | BASIS    |
| PD24186      | CD74 | cna | gain    | BASIS    |
| PD24202      | CD74 | cna | hetloss | BASIS    |
| PD24206      | CD74 | cna | gain    | BASIS    |
| PD24337      | CD74 | cna | hetloss | BASIS    |
| PD3890       | CD74 | cna | hetloss | BASIS    |
| PD3905       | CD74 | cna | gain    | BASIS    |
| PD4005       | CD74 | cna | hetloss | BASIS    |



|              |        |     |         |          |
|--------------|--------|-----|---------|----------|
| PD4826       | CD74   | cna | gain    | BASIS    |
| PD5935       | CD74   | cna | gain    | BASIS    |
| PD5945       | CD74   | cna | gain    | BASIS    |
| PD6406       | CD74   | cna | hetloss | BASIS    |
| PD6413       | CD74   | cna | hetloss | BASIS    |
| PD7067       | CD74   | cna | gain    | BASIS    |
| PD8980       | CD74   | cna | hetloss | BASIS    |
| PD9585       | CD74   | cna | hetloss | BASIS    |
| TCGA-A2-A25B | CHCHD7 | cna | gain    | TCGA     |
| TCGA-AO-A0JL | CHCHD7 | cna | amp     | TCGA     |
| TCGA-BH-A0AW | CHCHD7 | cna | gain    | TCGA     |
| TCGA-BH-A0C0 | CHCHD7 | cna | gain    | TCGA     |
| TCGA-BH-A18R | CHCHD7 | cna | homdel  | TCGA     |
| TCGA-BH-A1FU | CHCHD7 | cna | gain    | TCGA     |
| TCGA-D8-A27M | CHCHD7 | cna | amp     | TCGA     |
| TCGA-E9-A1NC | CHCHD7 | cna | amp     | TCGA     |
| TCGA-LL-A5YP | CHCHD7 | cna | gain    | TCGA     |
| MB-0346      | CHCHD7 | cna | gain    | METABRIC |
| MB-5465      | CHCHD7 | cna | hetloss | METABRIC |
| MB-6060      | CHCHD7 | cna | amp     | METABRIC |
| MB-6098      | CHCHD7 | cna | gain    | METABRIC |
| MB-7038      | CHCHD7 | cna | gain    | METABRIC |
| PD10014      | CHCHD7 | cna | amp     | BASIS    |
| PD11327      | CHCHD7 | cna | hetloss | BASIS    |
| PD13296      | CHCHD7 | cna | homdel  | BASIS    |
| PD13299      | CHCHD7 | cna | gain    | BASIS    |
| PD23562      | CHCHD7 | cna | gain    | BASIS    |
| PD23574      | CHCHD7 | cna | gain    | BASIS    |
| PD23578      | CHCHD7 | cna | hetloss | BASIS    |
| PD24186      | CHCHD7 | cna | gain    | BASIS    |
| PD24202      | CHCHD7 | cna | hetloss | BASIS    |
| PD3905       | CHCHD7 | cna | gain    | BASIS    |
| PD4005       | CHCHD7 | cna | hetloss | BASIS    |
| PD4006       | CHCHD7 | cna | gain    | BASIS    |
| PD4107       | CHCHD7 | cna | gain    | BASIS    |
| PD4826       | CHCHD7 | cna | amp     | BASIS    |
| PD5935       | CHCHD7 | cna | gain    | BASIS    |
| PD5945       | CHCHD7 | cna | gain    | BASIS    |
| PD7067       | CHCHD7 | cna | amp     | BASIS    |
| PD7215       | CHCHD7 | cna | amp     | BASIS    |
| PD8621       | CHCHD7 | cna | gain    | BASIS    |
| PD8980       | CHCHD7 | cna | gain    | BASIS    |
| PD9004       | CHCHD7 | cna | gain    | BASIS    |
| PD9585       | CHCHD7 | cna | hetloss | BASIS    |
| PD9702       | CHCHD7 | cna | gain    | BASIS    |
| TCGA-A2-A25B | CHD2   | cna | amp     | TCGA     |
| TCGA-AO-A0JL | CHD2   | cna | hetloss | TCGA     |

|              |       |     |         |          |
|--------------|-------|-----|---------|----------|
| TCGA-BH-A0AW | CHD2  | cna | hetloss | TCGA     |
| TCGA-BH-A0C0 | CHD2  | cna | gain    | TCGA     |
| TCGA-D8-A27M | CHD2  | cna | hetloss | TCGA     |
| TCGA-E2-A1L7 | CHD2  | cna | gain    | TCGA     |
| TCGA-LL-A5YP | CHD2  | cna | gain    | TCGA     |
| MB-0346      | CHD2  | cna | hetloss | METABRIC |
| MB-2827      | CHD2  | cna | amp     | METABRIC |
| MB-5465      | CHD2  | cna | hetloss | METABRIC |
| MB-6060      | CHD2  | cna | gain    | METABRIC |
| MB-7038      | CHD2  | cna | gain    | METABRIC |
| MB-7048      | CHD2  | cna | amp     | METABRIC |
| MB-0420      | CHD2  | cna | gain    | METABRIC |
| MTS-T0064    | CHD2  | cna | amp     | METABRIC |
| PD10014      | CHD2  | cna | gain    | BASIS    |
| PD11327      | CHD2  | cna | gain    | BASIS    |
| PD11742      | CHD2  | cna | hetloss | BASIS    |
| PD13296      | CHD2  | cna | gain    | BASIS    |
| PD13299      | CHD2  | cna | gain    | BASIS    |
| PD23562      | CHD2  | cna | gain    | BASIS    |
| PD23574      | CHD2  | cna | gain    | BASIS    |
| PD23578      | CHD2  | cna | gain    | BASIS    |
| PD24202      | CHD2  | cna | hetloss | BASIS    |
| PD24206      | CHD2  | cna | gain    | BASIS    |
| PD3890       | CHD2  | cna | hetloss | BASIS    |
| PD3905       | CHD2  | cna | gain    | BASIS    |
| PD4006       | CHD2  | cna | gain    | BASIS    |
| PD4107       | CHD2  | cna | gain    | BASIS    |
| PD5930       | CHD2  | cna | gain    | BASIS    |
| PD5945       | CHD2  | cna | gain    | BASIS    |
| PD6413       | CHD2  | cna | hetloss | BASIS    |
| PD7067       | CHD2  | cna | gain    | BASIS    |
| PD8621       | CHD2  | cna | gain    | BASIS    |
| PD8980       | CHD2  | cna | gain    | BASIS    |
| PD9585       | CHD2  | cna | hetloss | BASIS    |
| PD9702       | CHD2  | cna | gain    | BASIS    |
| TCGA-A2-A25B | CHEK1 | cna | hetloss | TCGA     |
| TCGA-AO-A0JL | CHEK1 | cna | hetloss | TCGA     |
| TCGA-BH-A0C0 | CHEK1 | cna | hetloss | TCGA     |
| TCGA-BH-A18R | CHEK1 | cna | homdel  | TCGA     |
| TCGA-D8-A27M | CHEK1 | cna | hetloss | TCGA     |
| TCGA-E2-A1L7 | CHEK1 | cna | hetloss | TCGA     |
| TCGA-E9-A1NC | CHEK1 | cna | hetloss | TCGA     |
| TCGA-EW-A10X | CHEK1 | cna | homdel  | TCGA     |
| TCGA-LL-A5YP | CHEK1 | cna | gain    | TCGA     |
| MB-0346      | CHEK1 | cna | hetloss | METABRIC |
| MB-5107      | CHEK1 | cna | hetloss | METABRIC |
| MB-6271      | CHEK1 | cna | hetloss | METABRIC |

|              |       |     |         |          |
|--------------|-------|-----|---------|----------|
| PD11327      | CHEK1 | cna | gain    | BASIS    |
| PD11742      | CHEK1 | cna | hetloss | BASIS    |
| PD13296      | CHEK1 | cna | hetloss | BASIS    |
| PD13297      | CHEK1 | cna | hetloss | BASIS    |
| PD13771      | CHEK1 | cna | hetloss | BASIS    |
| PD22355      | CHEK1 | cna | hetloss | BASIS    |
| PD23574      | CHEK1 | cna | gain    | BASIS    |
| PD23578      | CHEK1 | cna | hetloss | BASIS    |
| PD24186      | CHEK1 | cna | gain    | BASIS    |
| PD24202      | CHEK1 | cna | gain    | BASIS    |
| PD24206      | CHEK1 | cna | gain    | BASIS    |
| PD24337      | CHEK1 | cna | hetloss | BASIS    |
| PD3890       | CHEK1 | cna | gain    | BASIS    |
| PD3905       | CHEK1 | cna | gain    | BASIS    |
| PD4005       | CHEK1 | cna | hetloss | BASIS    |
| PD4826       | CHEK1 | cna | hetloss | BASIS    |
| PD5935       | CHEK1 | cna | gain    | BASIS    |
| PD5945       | CHEK1 | cna | gain    | BASIS    |
| PD5948       | CHEK1 | cna | gain    | BASIS    |
| PD6413       | CHEK1 | cna | hetloss | BASIS    |
| PD6731       | CHEK1 | cna | hetloss | BASIS    |
| PD7067       | CHEK1 | cna | gain    | BASIS    |
| PD7215       | CHEK1 | cna | gain    | BASIS    |
| PD9004       | CHEK1 | cna | hetloss | BASIS    |
| PD9702       | CHEK1 | cna | gain    | BASIS    |
| TCGA-AN-A0XU | CIITA | cna | gain    | TCGA     |
| TCGA-AO-A0JL | CIITA | cna | amp     | TCGA     |
| TCGA-BH-A0AW | CIITA | cna | gain    | TCGA     |
| TCGA-BH-A0C0 | CIITA | cna | gain    | TCGA     |
| TCGA-C8-A12L | CIITA | cna | gain    | TCGA     |
| TCGA-E2-A1L7 | CIITA | cna | hetloss | TCGA     |
| TCGA-LL-A5YP | CIITA | cna | gain    | TCGA     |
| MB-0346      | CIITA | cna | gain    | METABRIC |
| MB-6060      | CIITA | cna | gain    | METABRIC |
| MB-6098      | CIITA | cna | hetloss | METABRIC |
| MB-6271      | CIITA | cna | gain    | METABRIC |
| MB-7032      | CIITA | cna | gain    | METABRIC |
| MB-7038      | CIITA | cna | hetloss | METABRIC |
| MB-0420      | CIITA | cna | hetloss | METABRIC |
| PD10014      | CIITA | cna | hetloss | BASIS    |
| PD11327      | CIITA | cna | hetloss | BASIS    |
| PD11742      | CIITA | cna | gain    | BASIS    |
| PD13296      | CIITA | cna | gain    | BASIS    |
| PD13297      | CIITA | cna | hetloss | BASIS    |
| PD13299      | CIITA | cna | gain    | BASIS    |
| PD22355      | CIITA | cna | hetloss | BASIS    |
| PD23578      | CIITA | cna | hetloss | BASIS    |

|              |       |     |         |          |
|--------------|-------|-----|---------|----------|
| PD24186      | CIITA | cna | gain    | BASIS    |
| PD24206      | CIITA | cna | gain    | BASIS    |
| PD24337      | CIITA | cna | hetloss | BASIS    |
| PD3905       | CIITA | cna | gain    | BASIS    |
| PD4005       | CIITA | cna | gain    | BASIS    |
| PD4107       | CIITA | cna | gain    | BASIS    |
| PD4826       | CIITA | cna | gain    | BASIS    |
| PD5935       | CIITA | cna | gain    | BASIS    |
| PD5945       | CIITA | cna | gain    | BASIS    |
| PD5948       | CIITA | cna | gain    | BASIS    |
| PD7067       | CIITA | cna | gain    | BASIS    |
| PD7215       | CIITA | cna | amp     | BASIS    |
| PD9004       | CIITA | cna | gain    | BASIS    |
| PD9585       | CIITA | cna | hetloss | BASIS    |
| PD9702       | CIITA | cna | gain    | BASIS    |
| TCGA-AN-A0XU | CSF1R | cna | hetloss | TCGA     |
| TCGA-AO-A0JL | CSF1R | cna | hetloss | TCGA     |
| TCGA-BH-A0C0 | CSF1R | cna | hetloss | TCGA     |
| TCGA-BH-A18R | CSF1R | cna | gain    | TCGA     |
| TCGA-BH-A1FU | CSF1R | cna | hetloss | TCGA     |
| TCGA-C8-A12L | CSF1R | cna | hetloss | TCGA     |
| TCGA-D8-A27M | CSF1R | cna | hetloss | TCGA     |
| TCGA-E2-A1L7 | CSF1R | cna | hetloss | TCGA     |
| TCGA-E9-A1NC | CSF1R | cna | hetloss | TCGA     |
| TCGA-LL-A5YP | CSF1R | cna | hetloss | TCGA     |
| MB-0346      | CSF1R | cna | gain    | METABRIC |
| MB-5070      | CSF1R | cna | hetloss | METABRIC |
| MB-5465      | CSF1R | cna | hetloss | METABRIC |
| MB-6098      | CSF1R | cna | hetloss | METABRIC |
| MB-7038      | CSF1R | cna | hetloss | METABRIC |
| MB-0420      | CSF1R | cna | hetloss | METABRIC |
| PD10014      | CSF1R | cna | hetloss | BASIS    |
| PD13296      | CSF1R | cna | hetloss | BASIS    |
| PD13297      | CSF1R | cna | hetloss | BASIS    |
| PD13771      | CSF1R | cna | gain    | BASIS    |
| PD22355      | CSF1R | cna | hetloss | BASIS    |
| PD23578      | CSF1R | cna | hetloss | BASIS    |
| PD24186      | CSF1R | cna | gain    | BASIS    |
| PD24202      | CSF1R | cna | hetloss | BASIS    |
| PD24206      | CSF1R | cna | gain    | BASIS    |
| PD24337      | CSF1R | cna | hetloss | BASIS    |
| PD3890       | CSF1R | cna | hetloss | BASIS    |
| PD3905       | CSF1R | cna | gain    | BASIS    |
| PD4005       | CSF1R | cna | hetloss | BASIS    |
| PD4826       | CSF1R | cna | gain    | BASIS    |
| PD5935       | CSF1R | cna | gain    | BASIS    |
| PD5945       | CSF1R | cna | gain    | BASIS    |

|              |       |     |         |          |
|--------------|-------|-----|---------|----------|
| PD6406       | CSF1R | cna | hetloss | BASIS    |
| PD6413       | CSF1R | cna | hetloss | BASIS    |
| PD7067       | CSF1R | cna | gain    | BASIS    |
| PD8980       | CSF1R | cna | hetloss | BASIS    |
| PD9585       | CSF1R | cna | hetloss | BASIS    |
| TCGA-A2-A25B | CUX1  | cna | gain    | TCGA     |
| TCGA-AN-A0XU | CUX1  | cna | hetloss | TCGA     |
| TCGA-AO-A0JL | CUX1  | cna | gain    | TCGA     |
| TCGA-BH-A0AW | CUX1  | cna | gain    | TCGA     |
| TCGA-C8-A12L | CUX1  | cna | hetloss | TCGA     |
| TCGA-D8-A27M | CUX1  | cna | gain    | TCGA     |
| TCGA-E2-A1L7 | CUX1  | cna | hetloss | TCGA     |
| TCGA-E9-A1NC | CUX1  | cna | gain    | TCGA     |
| TCGA-LL-A5YP | CUX1  | cna | gain    | TCGA     |
| MB-0346      | CUX1  | cna | hetloss | METABRIC |
| MB-2827      | CUX1  | cna | hetloss | METABRIC |
| MB-5465      | CUX1  | cna | hetloss | METABRIC |
| MB-6098      | CUX1  | cna | hetloss | METABRIC |
| MB-7038      | CUX1  | cna | gain    | METABRIC |
| PD11327      | CUX1  | cna | gain    | BASIS    |
| PD13296      | CUX1  | cna | hetloss | BASIS    |
| PD22355      | CUX1  | cna | hetloss | BASIS    |
| PD23574      | CUX1  | cna | gain    | BASIS    |
| PD23578      | CUX1  | cna | hetloss | BASIS    |
| PD24186      | CUX1  | cna | amp     | BASIS    |
| PD24206      | CUX1  | cna | hetloss | BASIS    |
| PD3890       | CUX1  | cna | hetloss | BASIS    |
| PD3905       | CUX1  | cna | gain    | BASIS    |
| PD4006       | CUX1  | cna | amp     | BASIS    |
| PD4107       | CUX1  | cna | gain    | BASIS    |
| PD4826       | CUX1  | cna | gain    | BASIS    |
| PD5930       | CUX1  | cna | gain    | BASIS    |
| PD5935       | CUX1  | cna | gain    | BASIS    |
| PD5945       | CUX1  | cna | amp     | BASIS    |
| PD5948       | CUX1  | cna | gain    | BASIS    |
| PD6406       | CUX1  | cna | gain    | BASIS    |
| PD7067       | CUX1  | cna | gain    | BASIS    |
| PD7215       | CUX1  | cna | gain    | BASIS    |
| PD8621       | CUX1  | cna | gain    | BASIS    |
| PD9004       | CUX1  | cna | amp     | BASIS    |
| PD9585       | CUX1  | cna | hetloss | BASIS    |
| PD9702       | CUX1  | cna | gain    | BASIS    |
| TCGA-A2-A25B | DCHS1 | cna | hetloss | TCGA     |
| TCGA-AN-A0XU | DCHS1 | cna | hetloss | TCGA     |
| TCGA-AO-A0JL | DCHS1 | cna | hetloss | TCGA     |
| TCGA-BH-A0C0 | DCHS1 | cna | hetloss | TCGA     |
| TCGA-C8-A12L | DCHS1 | cna | hetloss | TCGA     |

|              |       |     |         |          |
|--------------|-------|-----|---------|----------|
| TCGA-E2-A1L7 | DCHS1 | cna | hetloss | TCGA     |
| TCGA-E9-A1NC | DCHS1 | cna | hetloss | TCGA     |
| TCGA-LL-A5YP | DCHS1 | cna | hetloss | TCGA     |
| MB-0346      | DCHS1 | cna | hetloss | METABRIC |
| MB-5070      | DCHS1 | cna | hetloss | METABRIC |
| MB-6060      | DCHS1 | cna | hetloss | METABRIC |
| MB-6271      | DCHS1 | cna | gain    | METABRIC |
| MB-7048      | DCHS1 | cna | hetloss | METABRIC |
| MB-0420      | DCHS1 | cna | hetloss | METABRIC |
| PD10014      | DCHS1 | cna | hetloss | BASIS    |
| PD11742      | DCHS1 | cna | hetloss | BASIS    |
| PD13296      | DCHS1 | cna | hetloss | BASIS    |
| PD13297      | DCHS1 | cna | hetloss | BASIS    |
| PD22355      | DCHS1 | cna | hetloss | BASIS    |
| PD23574      | DCHS1 | cna | gain    | BASIS    |
| PD24202      | DCHS1 | cna | hetloss | BASIS    |
| PD24206      | DCHS1 | cna | gain    | BASIS    |
| PD24337      | DCHS1 | cna | gain    | BASIS    |
| PD3890       | DCHS1 | cna | hetloss | BASIS    |
| PD3905       | DCHS1 | cna | gain    | BASIS    |
| PD4005       | DCHS1 | cna | hetloss | BASIS    |
| PD4107       | DCHS1 | cna | gain    | BASIS    |
| PD4826       | DCHS1 | cna | gain    | BASIS    |
| PD5935       | DCHS1 | cna | gain    | BASIS    |
| PD5945       | DCHS1 | cna | gain    | BASIS    |
| PD6406       | DCHS1 | cna | hetloss | BASIS    |
| PD6413       | DCHS1 | cna | hetloss | BASIS    |
| PD6731       | DCHS1 | cna | hetloss | BASIS    |
| PD7215       | DCHS1 | cna | hetloss | BASIS    |
| PD8621       | DCHS1 | cna | hetloss | BASIS    |
| PD8980       | DCHS1 | cna | hetloss | BASIS    |
| PD9585       | DCHS1 | cna | hetloss | BASIS    |
| TCGA-A2-A25B | DMD   | cna | gain    | TCGA     |
| TCGA-AN-A0XU | DMD   | cna | hetloss | TCGA     |
| TCGA-AO-A0JL | DMD   | cna | hetloss | TCGA     |
| TCGA-BH-A0AW | DMD   | cna | gain    | TCGA     |
| TCGA-E2-A1L7 | DMD   | cna | hetloss | TCGA     |
| TCGA-E9-A1NC | DMD   | cna | hetloss | TCGA     |
| TCGA-LL-A5YP | DMD   | cna | hetloss | TCGA     |
| MB-0346      | DMD   | cna | hetloss | METABRIC |
| MB-2827      | DMD   | cna | hetloss | METABRIC |
| MB-5465      | DMD   | cna | gain    | METABRIC |
| MB-6098      | DMD   | cna | hetloss | METABRIC |
| MB-7038      | DMD   | cna | gain    | METABRIC |
| MB-0420      | DMD   | cna | hetloss | METABRIC |
| PD10014      | DMD   | cna | hetloss | BASIS    |
| PD13296      | DMD   | cna | amp     | BASIS    |

|              |      |     |         |          |
|--------------|------|-----|---------|----------|
| PD13297      | DMD  | cna | gain    | BASIS    |
| PD13299      | DMD  | cna | gain    | BASIS    |
| PD13771      | DMD  | cna | gain    | BASIS    |
| PD14442      | DMD  | cna | gain    | BASIS    |
| PD23562      | DMD  | cna | hetloss | BASIS    |
| PD23574      | DMD  | cna | gain    | BASIS    |
| PD23578      | DMD  | cna | hetloss | BASIS    |
| PD3905       | DMD  | cna | amp     | BASIS    |
| PD4005       | DMD  | cna | hetloss | BASIS    |
| PD4006       | DMD  | cna | homdel  | BASIS    |
| PD4107       | DMD  | cna | hetloss | BASIS    |
| PD4826       | DMD  | cna | gain    | BASIS    |
| PD4967       | DMD  | cna | gain    | BASIS    |
| PD5935       | DMD  | cna | gain    | BASIS    |
| PD5948       | DMD  | cna | gain    | BASIS    |
| PD6406       | DMD  | cna | gain    | BASIS    |
| PD6413       | DMD  | cna | gain    | BASIS    |
| PD7215       | DMD  | cna | gain    | BASIS    |
| PD8621       | DMD  | cna | amp     | BASIS    |
| PD8980       | DMD  | cna | hetloss | BASIS    |
| PD9004       | DMD  | cna | gain    | BASIS    |
| PD9702       | DMD  | cna | hetloss | BASIS    |
| TCGA-A2-A25B | DTX1 | cna | gain    | TCGA     |
| TCGA-AN-A0XU | DTX1 | cna | hetloss | TCGA     |
| TCGA-AO-A0JL | DTX1 | cna | hetloss | TCGA     |
| TCGA-BH-A0C0 | DTX1 | cna | gain    | TCGA     |
| TCGA-BH-A18R | DTX1 | cna | gain    | TCGA     |
| TCGA-BH-A1FU | DTX1 | cna | hetloss | TCGA     |
| TCGA-D8-A27M | DTX1 | cna | hetloss | TCGA     |
| TCGA-E2-A1L7 | DTX1 | cna | gain    | TCGA     |
| TCGA-LL-A5YP | DTX1 | cna | hetloss | TCGA     |
| MB-0346      | DTX1 | cna | gain    | METABRIC |
| MB-2827      | DTX1 | cna | hetloss | METABRIC |
| MB-5070      | DTX1 | cna | hetloss | METABRIC |
| MB-6098      | DTX1 | cna | hetloss | METABRIC |
| MB-7048      | DTX1 | cna | hetloss | METABRIC |
| PD10014      | DTX1 | cna | gain    | BASIS    |
| PD11327      | DTX1 | cna | hetloss | BASIS    |
| PD11742      | DTX1 | cna | hetloss | BASIS    |
| PD13296      | DTX1 | cna | hetloss | BASIS    |
| PD13297      | DTX1 | cna | gain    | BASIS    |
| PD22355      | DTX1 | cna | hetloss | BASIS    |
| PD23574      | DTX1 | cna | gain    | BASIS    |
| PD23578      | DTX1 | cna | hetloss | BASIS    |
| PD3890       | DTX1 | cna | hetloss | BASIS    |
| PD3905       | DTX1 | cna | gain    | BASIS    |
| PD4005       | DTX1 | cna | hetloss | BASIS    |

|              |      |     |         |          |
|--------------|------|-----|---------|----------|
| PD4006       | DTX1 | cna | gain    | BASIS    |
| PD4107       | DTX1 | cna | gain    | BASIS    |
| PD4826       | DTX1 | cna | gain    | BASIS    |
| PD5945       | DTX1 | cna | gain    | BASIS    |
| PD5948       | DTX1 | cna | gain    | BASIS    |
| PD6406       | DTX1 | cna | hetloss | BASIS    |
| PD6413       | DTX1 | cna | hetloss | BASIS    |
| PD6731       | DTX1 | cna | hetloss | BASIS    |
| PD7067       | DTX1 | cna | gain    | BASIS    |
| PD9004       | DTX1 | cna | hetloss | BASIS    |
| PD9585       | DTX1 | cna | hetloss | BASIS    |
| PD9702       | DTX1 | cna | gain    | BASIS    |
| TCGA-A2-A25B | E2F3 | cna | gain    | TCGA     |
| TCGA-AN-A0XU | E2F3 | cna | amp     | TCGA     |
| TCGA-AO-A0JL | E2F3 | cna | gain    | TCGA     |
| TCGA-BH-A0AW | E2F3 | cna | gain    | TCGA     |
| TCGA-BH-A0C0 | E2F3 | cna | hetloss | TCGA     |
| TCGA-BH-A18R | E2F3 | cna | homdel  | TCGA     |
| TCGA-C8-A12L | E2F3 | cna | hetloss | TCGA     |
| TCGA-E2-A1L7 | E2F3 | cna | gain    | TCGA     |
| MB-5070      | E2F3 | cna | amp     | METABRIC |
| MB-5465      | E2F3 | cna | gain    | METABRIC |
| MB-6060      | E2F3 | cna | gain    | METABRIC |
| MB-7032      | E2F3 | cna | gain    | METABRIC |
| PD11327      | E2F3 | cna | amp     | BASIS    |
| PD13296      | E2F3 | cna | gain    | BASIS    |
| PD13297      | E2F3 | cna | gain    | BASIS    |
| PD13299      | E2F3 | cna | amp     | BASIS    |
| PD22355      | E2F3 | cna | gain    | BASIS    |
| PD23562      | E2F3 | cna | amp     | BASIS    |
| PD23574      | E2F3 | cna | gain    | BASIS    |
| PD24186      | E2F3 | cna | amp     | BASIS    |
| PD24202      | E2F3 | cna | gain    | BASIS    |
| PD24206      | E2F3 | cna | gain    | BASIS    |
| PD3905       | E2F3 | cna | amp     | BASIS    |
| PD4005       | E2F3 | cna | gain    | BASIS    |
| PD4006       | E2F3 | cna | gain    | BASIS    |
| PD4107       | E2F3 | cna | gain    | BASIS    |
| PD4826       | E2F3 | cna | gain    | BASIS    |
| PD5935       | E2F3 | cna | gain    | BASIS    |
| PD5945       | E2F3 | cna | amp     | BASIS    |
| PD5948       | E2F3 | cna | amp     | BASIS    |
| PD6731       | E2F3 | cna | hetloss | BASIS    |
| PD7067       | E2F3 | cna | amp     | BASIS    |
| PD7215       | E2F3 | cna | gain    | BASIS    |
| PD8621       | E2F3 | cna | amp     | BASIS    |
| PD8980       | E2F3 | cna | gain    | BASIS    |



|              |          |     |         |          |
|--------------|----------|-----|---------|----------|
| PD9004       | E2F3     | cna | amp     | BASIS    |
| PD9702       | E2F3     | cna | gain    | BASIS    |
| TCGA-A2-A25B | EED      | cna | hetloss | TCGA     |
| TCGA-AN-A0XU | EED      | cna | gain    | TCGA     |
| TCGA-AO-A0JL | EED      | cna | hetloss | TCGA     |
| TCGA-C8-A12L | EED      | cna | gain    | TCGA     |
| TCGA-D8-A27M | EED      | cna | gain    | TCGA     |
| TCGA-EW-A10X | EED      | cna | homdel  | TCGA     |
| TCGA-LL-A5YP | EED      | cna | hetloss | TCGA     |
| MB-0346      | EED      | cna | gain    | METABRIC |
| MB-5070      | EED      | cna | hetloss | METABRIC |
| MB-5107      | EED      | cna | amp     | METABRIC |
| MB-6271      | EED      | cna | hetloss | METABRIC |
| MB-7032      | EED      | cna | hetloss | METABRIC |
| MTS-T0064    | EED      | cna | gain    | METABRIC |
| PD10014      | EED      | cna | gain    | BASIS    |
| PD11327      | EED      | cna | gain    | BASIS    |
| PD11742      | EED      | cna | hetloss | BASIS    |
| PD13771      | EED      | cna | hetloss | BASIS    |
| PD22355      | EED      | cna | hetloss | BASIS    |
| PD23574      | EED      | cna | gain    | BASIS    |
| PD23578      | EED      | cna | hetloss | BASIS    |
| PD24186      | EED      | cna | gain    | BASIS    |
| PD24206      | EED      | cna | gain    | BASIS    |
| PD24337      | EED      | cna | hetloss | BASIS    |
| PD3905       | EED      | cna | gain    | BASIS    |
| PD4005       | EED      | cna | gain    | BASIS    |
| PD4006       | EED      | cna | hetloss | BASIS    |
| PD4826       | EED      | cna | gain    | BASIS    |
| PD5930       | EED      | cna | gain    | BASIS    |
| PD5935       | EED      | cna | gain    | BASIS    |
| PD5945       | EED      | cna | gain    | BASIS    |
| PD5948       | EED      | cna | gain    | BASIS    |
| PD6413       | EED      | cna | hetloss | BASIS    |
| PD7215       | EED      | cna | gain    | BASIS    |
| PD8980       | EED      | cna | gain    | BASIS    |
| PD9004       | EED      | cna | gain    | BASIS    |
| PD9585       | EED      | cna | hetloss | BASIS    |
| PD9702       | EED      | cna | gain    | BASIS    |
| TCGA-A2-A25B | EIF4EBP1 | cna | hetloss | TCGA     |
| TCGA-AN-A0XU | EIF4EBP1 | cna | hetloss | TCGA     |
| TCGA-AO-A0JL | EIF4EBP1 | cna | gain    | TCGA     |
| TCGA-BH-A0C0 | EIF4EBP1 | cna | hetloss | TCGA     |
| TCGA-BH-A1FU | EIF4EBP1 | cna | homdel  | TCGA     |
| TCGA-D8-A27M | EIF4EBP1 | cna | hetloss | TCGA     |
| TCGA-E2-A1L7 | EIF4EBP1 | cna | hetloss | TCGA     |
| TCGA-LL-A5YP | EIF4EBP1 | cna | hetloss | TCGA     |

|              |          |     |         |          |
|--------------|----------|-----|---------|----------|
| MB-0346      | EIF4EBP1 | cna | hetloss | METABRIC |
| MB-5465      | EIF4EBP1 | cna | hetloss | METABRIC |
| MB-6060      | EIF4EBP1 | cna | gain    | METABRIC |
| MB-7038      | EIF4EBP1 | cna | hetloss | METABRIC |
| MB-0420      | EIF4EBP1 | cna | hetloss | METABRIC |
| PD10014      | EIF4EBP1 | cna | hetloss | BASIS    |
| PD11327      | EIF4EBP1 | cna | homdel  | BASIS    |
| PD13296      | EIF4EBP1 | cna | hetloss | BASIS    |
| PD13299      | EIF4EBP1 | cna | gain    | BASIS    |
| PD13771      | EIF4EBP1 | cna | hetloss | BASIS    |
| PD14442      | EIF4EBP1 | cna | hetloss | BASIS    |
| PD23562      | EIF4EBP1 | cna | gain    | BASIS    |
| PD23578      | EIF4EBP1 | cna | hetloss | BASIS    |
| PD24186      | EIF4EBP1 | cna | gain    | BASIS    |
| PD24202      | EIF4EBP1 | cna | hetloss | BASIS    |
| PD24206      | EIF4EBP1 | cna | amp     | BASIS    |
| PD24337      | EIF4EBP1 | cna | hetloss | BASIS    |
| PD3905       | EIF4EBP1 | cna | gain    | BASIS    |
| PD4006       | EIF4EBP1 | cna | gain    | BASIS    |
| PD4107       | EIF4EBP1 | cna | gain    | BASIS    |
| PD4826       | EIF4EBP1 | cna | hetloss | BASIS    |
| PD5935       | EIF4EBP1 | cna | gain    | BASIS    |
| PD5945       | EIF4EBP1 | cna | gain    | BASIS    |
| PD7067       | EIF4EBP1 | cna | gain    | BASIS    |
| PD7215       | EIF4EBP1 | cna | amp     | BASIS    |
| PD8980       | EIF4EBP1 | cna | amp     | BASIS    |
| PD9004       | EIF4EBP1 | cna | gain    | BASIS    |
| PD9585       | EIF4EBP1 | cna | hetloss | BASIS    |
| PD9702       | EIF4EBP1 | cna | gain    | BASIS    |
| TCGA-A2-A25B | EPHB3    | cna | amp     | TCGA     |
| TCGA-AN-A0XU | EPHB3    | cna | gain    | TCGA     |
| TCGA-BH-A0AW | EPHB3    | cna | gain    | TCGA     |
| TCGA-BH-A0C0 | EPHB3    | cna | gain    | TCGA     |
| TCGA-BH-A1FU | EPHB3    | cna | hetloss | TCGA     |
| TCGA-C8-A12L | EPHB3    | cna | gain    | TCGA     |
| TCGA-E2-A1L7 | EPHB3    | cna | gain    | TCGA     |
| TCGA-LL-A5YP | EPHB3    | cna | gain    | TCGA     |
| MB-0346      | EPHB3    | cna | gain    | METABRIC |
| MB-5107      | EPHB3    | cna | amp     | METABRIC |
| MB-6098      | EPHB3    | cna | gain    | METABRIC |
| MB-0420      | EPHB3    | cna | gain    | METABRIC |
| MTS-T0064    | EPHB3    | cna | amp     | METABRIC |
| PD11327      | EPHB3    | cna | homdel  | BASIS    |
| PD11742      | EPHB3    | cna | gain    | BASIS    |
| PD13299      | EPHB3    | cna | gain    | BASIS    |
| PD13771      | EPHB3    | cna | hetloss | BASIS    |
| PD22355      | EPHB3    | cna | gain    | BASIS    |

|              |       |     |         |          |
|--------------|-------|-----|---------|----------|
| PD23561      | EPHB3 | cna | hetloss | BASIS    |
| PD23562      | EPHB3 | cna | gain    | BASIS    |
| PD23578      | EPHB3 | cna | gain    | BASIS    |
| PD24186      | EPHB3 | cna | amp     | BASIS    |
| PD24202      | EPHB3 | cna | gain    | BASIS    |
| PD24206      | EPHB3 | cna | gain    | BASIS    |
| PD3905       | EPHB3 | cna | gain    | BASIS    |
| PD4005       | EPHB3 | cna | gain    | BASIS    |
| PD4107       | EPHB3 | cna | gain    | BASIS    |
| PD4826       | EPHB3 | cna | gain    | BASIS    |
| PD5945       | EPHB3 | cna | amp     | BASIS    |
| PD5948       | EPHB3 | cna | gain    | BASIS    |
| PD6406       | EPHB3 | cna | gain    | BASIS    |
| PD6731       | EPHB3 | cna | gain    | BASIS    |
| PD7067       | EPHB3 | cna | gain    | BASIS    |
| PD7215       | EPHB3 | cna | gain    | BASIS    |
| PD8621       | EPHB3 | cna | gain    | BASIS    |
| PD8980       | EPHB3 | cna | gain    | BASIS    |
| PD9702       | EPHB3 | cna | gain    | BASIS    |
| TCGA-A2-A25B | EPHB4 | cna | gain    | TCGA     |
| TCGA-AN-A0XU | EPHB4 | cna | hetloss | TCGA     |
| TCGA-AO-A0JL | EPHB4 | cna | gain    | TCGA     |
| TCGA-BH-A0AW | EPHB4 | cna | gain    | TCGA     |
| TCGA-C8-A12L | EPHB4 | cna | hetloss | TCGA     |
| TCGA-D8-A27M | EPHB4 | cna | gain    | TCGA     |
| TCGA-E2-A1L7 | EPHB4 | cna | hetloss | TCGA     |
| TCGA-E9-A1NC | EPHB4 | cna | gain    | TCGA     |
| TCGA-LL-A5YP | EPHB4 | cna | gain    | TCGA     |
| MB-0346      | EPHB4 | cna | hetloss | METABRIC |
| MB-2827      | EPHB4 | cna | hetloss | METABRIC |
| MB-5465      | EPHB4 | cna | hetloss | METABRIC |
| MB-7038      | EPHB4 | cna | gain    | METABRIC |
| PD11327      | EPHB4 | cna | gain    | BASIS    |
| PD13296      | EPHB4 | cna | hetloss | BASIS    |
| PD13299      | EPHB4 | cna | hetloss | BASIS    |
| PD22355      | EPHB4 | cna | hetloss | BASIS    |
| PD23574      | EPHB4 | cna | gain    | BASIS    |
| PD23578      | EPHB4 | cna | hetloss | BASIS    |
| PD24186      | EPHB4 | cna | amp     | BASIS    |
| PD24206      | EPHB4 | cna | homdel  | BASIS    |
| PD3890       | EPHB4 | cna | hetloss | BASIS    |
| PD3905       | EPHB4 | cna | gain    | BASIS    |
| PD4006       | EPHB4 | cna | amp     | BASIS    |
| PD4107       | EPHB4 | cna | gain    | BASIS    |
| PD4826       | EPHB4 | cna | gain    | BASIS    |
| PD5930       | EPHB4 | cna | gain    | BASIS    |
| PD5935       | EPHB4 | cna | gain    | BASIS    |

|              |       |     |         |          |
|--------------|-------|-----|---------|----------|
| PD5945       | EPHB4 | cna | amp     | BASIS    |
| PD5948       | EPHB4 | cna | gain    | BASIS    |
| PD6406       | EPHB4 | cna | gain    | BASIS    |
| PD7067       | EPHB4 | cna | amp     | BASIS    |
| PD7215       | EPHB4 | cna | gain    | BASIS    |
| PD8621       | EPHB4 | cna | gain    | BASIS    |
| PD9004       | EPHB4 | cna | amp     | BASIS    |
| PD9585       | EPHB4 | cna | hetloss | BASIS    |
| PD9702       | EPHB4 | cna | gain    | BASIS    |
| TCGA-A2-A25B | ERCC5 | cna | hetloss | TCGA     |
| TCGA-AN-A0XU | ERCC5 | cna | hetloss | TCGA     |
| TCGA-AO-A0JL | ERCC5 | cna | hetloss | TCGA     |
| TCGA-BH-A0C0 | ERCC5 | cna | hetloss | TCGA     |
| TCGA-BH-A1FU | ERCC5 | cna | hetloss | TCGA     |
| TCGA-C8-A12L | ERCC5 | cna | gain    | TCGA     |
| TCGA-D8-A27M | ERCC5 | cna | gain    | TCGA     |
| TCGA-LL-A5YP | ERCC5 | cna | hetloss | TCGA     |
| MB-5107      | ERCC5 | cna | hetloss | METABRIC |
| MB-5465      | ERCC5 | cna | gain    | METABRIC |
| MB-6060      | ERCC5 | cna | hetloss | METABRIC |
| MB-0420      | ERCC5 | cna | amp     | METABRIC |
| PD10014      | ERCC5 | cna | hetloss | BASIS    |
| PD11327      | ERCC5 | cna | amp     | BASIS    |
| PD13296      | ERCC5 | cna | hetloss | BASIS    |
| PD13299      | ERCC5 | cna | gain    | BASIS    |
| PD14442      | ERCC5 | cna | hetloss | BASIS    |
| PD23562      | ERCC5 | cna | gain    | BASIS    |
| PD23574      | ERCC5 | cna | gain    | BASIS    |
| PD23578      | ERCC5 | cna | gain    | BASIS    |
| PD24186      | ERCC5 | cna | gain    | BASIS    |
| PD24202      | ERCC5 | cna | gain    | BASIS    |
| PD24206      | ERCC5 | cna | gain    | BASIS    |
| PD24337      | ERCC5 | cna | hetloss | BASIS    |
| PD3905       | ERCC5 | cna | amp     | BASIS    |
| PD4005       | ERCC5 | cna | hetloss | BASIS    |
| PD4006       | ERCC5 | cna | hetloss | BASIS    |
| PD4107       | ERCC5 | cna | hetloss | BASIS    |
| PD4967       | ERCC5 | cna | hetloss | BASIS    |
| PD5945       | ERCC5 | cna | amp     | BASIS    |
| PD5948       | ERCC5 | cna | hetloss | BASIS    |
| PD6731       | ERCC5 | cna | hetloss | BASIS    |
| PD7215       | ERCC5 | cna | gain    | BASIS    |
| PD8621       | ERCC5 | cna | amp     | BASIS    |
| PD8980       | ERCC5 | cna | hetloss | BASIS    |
| PD9585       | ERCC5 | cna | gain    | BASIS    |
| PD9702       | ERCC5 | cna | gain    | BASIS    |
| TCGA-A2-A25B | ETS1  | cna | hetloss | TCGA     |

|              |      |     |         |          |
|--------------|------|-----|---------|----------|
| TCGA-AO-A0JL | ETS1 | cna | hetloss | TCGA     |
| TCGA-BH-A0C0 | ETS1 | cna | hetloss | TCGA     |
| TCGA-BH-A18R | ETS1 | cna | homdel  | TCGA     |
| TCGA-D8-A27M | ETS1 | cna | hetloss | TCGA     |
| TCGA-E2-A1L7 | ETS1 | cna | hetloss | TCGA     |
| TCGA-E9-A1NC | ETS1 | cna | hetloss | TCGA     |
| TCGA-EW-A10X | ETS1 | cna | homdel  | TCGA     |
| TCGA-LL-A5YP | ETS1 | cna | gain    | TCGA     |
| MB-0346      | ETS1 | cna | hetloss | METABRIC |
| MB-5107      | ETS1 | cna | hetloss | METABRIC |
| MB-6271      | ETS1 | cna | hetloss | METABRIC |
| PD11327      | ETS1 | cna | gain    | BASIS    |
| PD11742      | ETS1 | cna | hetloss | BASIS    |
| PD13296      | ETS1 | cna | hetloss | BASIS    |
| PD13297      | ETS1 | cna | hetloss | BASIS    |
| PD13771      | ETS1 | cna | hetloss | BASIS    |
| PD22355      | ETS1 | cna | hetloss | BASIS    |
| PD23574      | ETS1 | cna | gain    | BASIS    |
| PD23578      | ETS1 | cna | hetloss | BASIS    |
| PD24186      | ETS1 | cna | gain    | BASIS    |
| PD24202      | ETS1 | cna | gain    | BASIS    |
| PD24206      | ETS1 | cna | gain    | BASIS    |
| PD24337      | ETS1 | cna | hetloss | BASIS    |
| PD3890       | ETS1 | cna | hetloss | BASIS    |
| PD3905       | ETS1 | cna | gain    | BASIS    |
| PD4005       | ETS1 | cna | homdel  | BASIS    |
| PD4826       | ETS1 | cna | gain    | BASIS    |
| PD5935       | ETS1 | cna | gain    | BASIS    |
| PD5945       | ETS1 | cna | amp     | BASIS    |
| PD5948       | ETS1 | cna | gain    | BASIS    |
| PD6413       | ETS1 | cna | hetloss | BASIS    |
| PD6731       | ETS1 | cna | hetloss | BASIS    |
| PD7067       | ETS1 | cna | gain    | BASIS    |
| PD7215       | ETS1 | cna | gain    | BASIS    |
| PD9004       | ETS1 | cna | hetloss | BASIS    |
| PD9702       | ETS1 | cna | gain    | BASIS    |
| TCGA-A2-A25B | ETV5 | cna | amp     | TCGA     |
| TCGA-AN-A0XU | ETV5 | cna | gain    | TCGA     |
| TCGA-BH-A0AW | ETV5 | cna | gain    | TCGA     |
| TCGA-BH-A0C0 | ETV5 | cna | gain    | TCGA     |
| TCGA-BH-A1FU | ETV5 | cna | hetloss | TCGA     |
| TCGA-C8-A12L | ETV5 | cna | gain    | TCGA     |
| TCGA-LL-A5YP | ETV5 | cna | gain    | TCGA     |
| MB-0346      | ETV5 | cna | gain    | METABRIC |
| MB-5070      | ETV5 | cna | hetloss | METABRIC |
| MB-5107      | ETV5 | cna | amp     | METABRIC |
| MB-6098      | ETV5 | cna | gain    | METABRIC |

|              |         |     |         |          |
|--------------|---------|-----|---------|----------|
| MB-7038      | ETV5    | cna | hetloss | METABRIC |
| MB-0420      | ETV5    | cna | gain    | METABRIC |
| PD11327      | ETV5    | cna | homdel  | BASIS    |
| PD13299      | ETV5    | cna | gain    | BASIS    |
| PD13771      | ETV5    | cna | hetloss | BASIS    |
| PD22355      | ETV5    | cna | gain    | BASIS    |
| PD23561      | ETV5    | cna | hetloss | BASIS    |
| PD23562      | ETV5    | cna | gain    | BASIS    |
| PD23578      | ETV5    | cna | gain    | BASIS    |
| PD24186      | ETV5    | cna | amp     | BASIS    |
| PD24202      | ETV5    | cna | gain    | BASIS    |
| PD24206      | ETV5    | cna | hetloss | BASIS    |
| PD3905       | ETV5    | cna | gain    | BASIS    |
| PD4005       | ETV5    | cna | gain    | BASIS    |
| PD4107       | ETV5    | cna | gain    | BASIS    |
| PD4826       | ETV5    | cna | gain    | BASIS    |
| PD5945       | ETV5    | cna | amp     | BASIS    |
| PD5948       | ETV5    | cna | gain    | BASIS    |
| PD6406       | ETV5    | cna | gain    | BASIS    |
| PD6731       | ETV5    | cna | gain    | BASIS    |
| PD7067       | ETV5    | cna | gain    | BASIS    |
| PD7215       | ETV5    | cna | gain    | BASIS    |
| PD8621       | ETV5    | cna | gain    | BASIS    |
| PD8980       | ETV5    | cna | gain    | BASIS    |
| PD9004       | ETV5    | cna | gain    | BASIS    |
| PD9702       | ETV5    | cna | gain    | BASIS    |
| TCGA-A2-A25B | FAM175A | cna | hetloss | TCGA     |
| TCGA-AN-A0XU | FAM175A | cna | hetloss | TCGA     |
| TCGA-AO-A0JL | FAM175A | cna | gain    | TCGA     |
| TCGA-BH-A0AW | FAM175A | cna | hetloss | TCGA     |
| TCGA-BH-A0C0 | FAM175A | cna | gain    | TCGA     |
| TCGA-BH-A1FU | FAM175A | cna | gain    | TCGA     |
| TCGA-D8-A27M | FAM175A | cna | gain    | TCGA     |
| TCGA-E2-A1L7 | FAM175A | cna | hetloss | TCGA     |
| TCGA-E9-A1NC | FAM175A | cna | hetloss | TCGA     |
| TCGA-LL-A5YP | FAM175A | cna | gain    | TCGA     |
| MB-5070      | FAM175A | cna | hetloss | METABRIC |
| MB-5465      | FAM175A | cna | hetloss | METABRIC |
| MB-6060      | FAM175A | cna | hetloss | METABRIC |
| MB-0420      | FAM175A | cna | hetloss | METABRIC |
| PD11327      | FAM175A | cna | homdel  | BASIS    |
| PD11742      | FAM175A | cna | hetloss | BASIS    |
| PD13296      | FAM175A | cna | hetloss | BASIS    |
| PD13297      | FAM175A | cna | hetloss | BASIS    |
| PD13771      | FAM175A | cna | gain    | BASIS    |
| PD22355      | FAM175A | cna | hetloss | BASIS    |
| PD23562      | FAM175A | cna | gain    | BASIS    |

|              |         |     |         |          |
|--------------|---------|-----|---------|----------|
| PD23578      | FAM175A | cna | hetloss | BASIS    |
| PD24202      | FAM175A | cna | hetloss | BASIS    |
| PD24206      | FAM175A | cna | gain    | BASIS    |
| PD3890       | FAM175A | cna | gain    | BASIS    |
| PD3905       | FAM175A | cna | gain    | BASIS    |
| PD4107       | FAM175A | cna | gain    | BASIS    |
| PD4826       | FAM175A | cna | gain    | BASIS    |
| PD5930       | FAM175A | cna | hetloss | BASIS    |
| PD5935       | FAM175A | cna | gain    | BASIS    |
| PD5948       | FAM175A | cna | gain    | BASIS    |
| PD6731       | FAM175A | cna | hetloss | BASIS    |
| PD7215       | FAM175A | cna | gain    | BASIS    |
| PD8621       | FAM175A | cna | hetloss | BASIS    |
| PD8980       | FAM175A | cna | hetloss | BASIS    |
| PD9585       | FAM175A | cna | hetloss | BASIS    |
| PD9702       | FAM175A | cna | hetloss | BASIS    |
| TCGA-A2-A25B | FLI1    | cna | hetloss | TCGA     |
| TCGA-AO-A0JL | FLI1    | cna | hetloss | TCGA     |
| TCGA-BH-A0C0 | FLI1    | cna | hetloss | TCGA     |
| TCGA-BH-A18R | FLI1    | cna | homdel  | TCGA     |
| TCGA-D8-A27M | FLI1    | cna | hetloss | TCGA     |
| TCGA-E2-A1L7 | FLI1    | cna | hetloss | TCGA     |
| TCGA-E9-A1NC | FLI1    | cna | hetloss | TCGA     |
| TCGA-EW-A10X | FLI1    | cna | homdel  | TCGA     |
| TCGA-LL-A5YP | FLI1    | cna | gain    | TCGA     |
| MB-0346      | FLI1    | cna | hetloss | METABRIC |
| MB-5107      | FLI1    | cna | hetloss | METABRIC |
| MB-6271      | FLI1    | cna | hetloss | METABRIC |
| PD11327      | FLI1    | cna | gain    | BASIS    |
| PD11742      | FLI1    | cna | hetloss | BASIS    |
| PD13296      | FLI1    | cna | hetloss | BASIS    |
| PD13297      | FLI1    | cna | hetloss | BASIS    |
| PD13771      | FLI1    | cna | hetloss | BASIS    |
| PD22355      | FLI1    | cna | hetloss | BASIS    |
| PD23574      | FLI1    | cna | gain    | BASIS    |
| PD23578      | FLI1    | cna | hetloss | BASIS    |
| PD24186      | FLI1    | cna | gain    | BASIS    |
| PD24202      | FLI1    | cna | gain    | BASIS    |
| PD24206      | FLI1    | cna | gain    | BASIS    |
| PD24337      | FLI1    | cna | hetloss | BASIS    |
| PD3890       | FLI1    | cna | hetloss | BASIS    |
| PD3905       | FLI1    | cna | gain    | BASIS    |
| PD4005       | FLI1    | cna | homdel  | BASIS    |
| PD4826       | FLI1    | cna | gain    | BASIS    |
| PD5935       | FLI1    | cna | gain    | BASIS    |
| PD5945       | FLI1    | cna | amp     | BASIS    |
| PD5948       | FLI1    | cna | gain    | BASIS    |

|              |      |     |         |          |
|--------------|------|-----|---------|----------|
| PD6413       | FLI1 | cna | hetloss | BASIS    |
| PD6731       | FLI1 | cna | hetloss | BASIS    |
| PD7067       | FLI1 | cna | gain    | BASIS    |
| PD7215       | FLI1 | cna | gain    | BASIS    |
| PD9004       | FLI1 | cna | hetloss | BASIS    |
| PD9702       | FLI1 | cna | gain    | BASIS    |
| TCGA-AO-A0JL | FLT1 | cna | hetloss | TCGA     |
| TCGA-BH-A0AW | FLT1 | cna | hetloss | TCGA     |
| TCGA-BH-A0C0 | FLT1 | cna | gain    | TCGA     |
| TCGA-BH-A1FU | FLT1 | cna | hetloss | TCGA     |
| TCGA-C8-A12L | FLT1 | cna | hetloss | TCGA     |
| TCGA-D8-A27M | FLT1 | cna | gain    | TCGA     |
| TCGA-E9-A1NC | FLT1 | cna | hetloss | TCGA     |
| TCGA-EW-A10X | FLT1 | cna | homdel  | TCGA     |
| TCGA-LL-A5YP | FLT1 | cna | hetloss | TCGA     |
| MB-0346      | FLT1 | cna | amp     | METABRIC |
| MB-2827      | FLT1 | cna | hetloss | METABRIC |
| MB-6098      | FLT1 | cna | hetloss | METABRIC |
| MB-7032      | FLT1 | cna | gain    | METABRIC |
| MB-0420      | FLT1 | cna | hetloss | METABRIC |
| PD10014      | FLT1 | cna | hetloss | BASIS    |
| PD13296      | FLT1 | cna | hetloss | BASIS    |
| PD13297      | FLT1 | cna | hetloss | BASIS    |
| PD13771      | FLT1 | cna | hetloss | BASIS    |
| PD14442      | FLT1 | cna | hetloss | BASIS    |
| PD22355      | FLT1 | cna | hetloss | BASIS    |
| PD23562      | FLT1 | cna | gain    | BASIS    |
| PD23578      | FLT1 | cna | hetloss | BASIS    |
| PD24202      | FLT1 | cna | hetloss | BASIS    |
| PD3890       | FLT1 | cna | hetloss | BASIS    |
| PD3905       | FLT1 | cna | gain    | BASIS    |
| PD4005       | FLT1 | cna | homdel  | BASIS    |
| PD4006       | FLT1 | cna | gain    | BASIS    |
| PD4107       | FLT1 | cna | gain    | BASIS    |
| PD4826       | FLT1 | cna | hetloss | BASIS    |
| PD4967       | FLT1 | cna | hetloss | BASIS    |
| PD5945       | FLT1 | cna | amp     | BASIS    |
| PD6406       | FLT1 | cna | hetloss | BASIS    |
| PD6413       | FLT1 | cna | hetloss | BASIS    |
| PD6731       | FLT1 | cna | hetloss | BASIS    |
| PD7067       | FLT1 | cna | gain    | BASIS    |
| PD8980       | FLT1 | cna | hetloss | BASIS    |
| PD9702       | FLT1 | cna | gain    | BASIS    |
| TCGA-A2-A25B | GAS7 | cna | hetloss | TCGA     |
| TCGA-AN-A0XU | GAS7 | cna | hetloss | TCGA     |
| TCGA-AO-A0JL | GAS7 | cna | gain    | TCGA     |
| TCGA-BH-A0AW | GAS7 | cna | hetloss | TCGA     |



|              |       |     |         |          |
|--------------|-------|-----|---------|----------|
| TCGA-BH-A0C0 | GAS7  | cna | hetloss | TCGA     |
| TCGA-C8-A12L | GAS7  | cna | hetloss | TCGA     |
| TCGA-D8-A27M | GAS7  | cna | hetloss | TCGA     |
| TCGA-E2-A1L7 | GAS7  | cna | hetloss | TCGA     |
| TCGA-E9-A1NC | GAS7  | cna | hetloss | TCGA     |
| TCGA-LL-A5YP | GAS7  | cna | gain    | TCGA     |
| MB-0346      | GAS7  | cna | hetloss | METABRIC |
| MB-2827      | GAS7  | cna | hetloss | METABRIC |
| MB-5070      | GAS7  | cna | hetloss | METABRIC |
| MB-5107      | GAS7  | cna | hetloss | METABRIC |
| MB-6098      | GAS7  | cna | hetloss | METABRIC |
| MB-6271      | GAS7  | cna | hetloss | METABRIC |
| MB-7048      | GAS7  | cna | hetloss | METABRIC |
| MB-0420      | GAS7  | cna | hetloss | METABRIC |
| PD11742      | GAS7  | cna | hetloss | BASIS    |
| PD13296      | GAS7  | cna | hetloss | BASIS    |
| PD13771      | GAS7  | cna | hetloss | BASIS    |
| PD22355      | GAS7  | cna | hetloss | BASIS    |
| PD23561      | GAS7  | cna | hetloss | BASIS    |
| PD24202      | GAS7  | cna | hetloss | BASIS    |
| PD24206      | GAS7  | cna | hetloss | BASIS    |
| PD24337      | GAS7  | cna | hetloss | BASIS    |
| PD3890       | GAS7  | cna | hetloss | BASIS    |
| PD3905       | GAS7  | cna | gain    | BASIS    |
| PD4005       | GAS7  | cna | homdel  | BASIS    |
| PD4826       | GAS7  | cna | hetloss | BASIS    |
| PD4967       | GAS7  | cna | hetloss | BASIS    |
| PD5945       | GAS7  | cna | gain    | BASIS    |
| PD6406       | GAS7  | cna | hetloss | BASIS    |
| PD6413       | GAS7  | cna | hetloss | BASIS    |
| PD6731       | GAS7  | cna | hetloss | BASIS    |
| PD7067       | GAS7  | cna | gain    | BASIS    |
| PD9585       | GAS7  | cna | hetloss | BASIS    |
| TCGA-A2-A25B | GATA1 | cna | gain    | TCGA     |
| TCGA-AN-A0XU | GATA1 | cna | hetloss | TCGA     |
| TCGA-AO-A0JL | GATA1 | cna | gain    | TCGA     |
| TCGA-BH-A0AW | GATA1 | cna | gain    | TCGA     |
| TCGA-E2-A1L7 | GATA1 | cna | hetloss | TCGA     |
| TCGA-E9-A1NC | GATA1 | cna | hetloss | TCGA     |
| MB-0346      | GATA1 | cna | gain    | METABRIC |
| MB-2827      | GATA1 | cna | hetloss | METABRIC |
| MB-5465      | GATA1 | cna | gain    | METABRIC |
| MB-6098      | GATA1 | cna | hetloss | METABRIC |
| MB-0420      | GATA1 | cna | hetloss | METABRIC |
| PD10014      | GATA1 | cna | hetloss | BASIS    |
| PD11327      | GATA1 | cna | homdel  | BASIS    |
| PD13296      | GATA1 | cna | gain    | BASIS    |

|              |       |     |         |          |
|--------------|-------|-----|---------|----------|
| PD13297      | GATA1 | cna | gain    | BASIS    |
| PD13299      | GATA1 | cna | amp     | BASIS    |
| PD13771      | GATA1 | cna | gain    | BASIS    |
| PD14442      | GATA1 | cna | gain    | BASIS    |
| PD23562      | GATA1 | cna | hetloss | BASIS    |
| PD23574      | GATA1 | cna | gain    | BASIS    |
| PD24206      | GATA1 | cna | hetloss | BASIS    |
| PD3905       | GATA1 | cna | gain    | BASIS    |
| PD4005       | GATA1 | cna | hetloss | BASIS    |
| PD4006       | GATA1 | cna | hetloss | BASIS    |
| PD4107       | GATA1 | cna | gain    | BASIS    |
| PD4826       | GATA1 | cna | gain    | BASIS    |
| PD4967       | GATA1 | cna | gain    | BASIS    |
| PD5935       | GATA1 | cna | gain    | BASIS    |
| PD5945       | GATA1 | cna | gain    | BASIS    |
| PD5948       | GATA1 | cna | gain    | BASIS    |
| PD6406       | GATA1 | cna | gain    | BASIS    |
| PD6413       | GATA1 | cna | gain    | BASIS    |
| PD7067       | GATA1 | cna | gain    | BASIS    |
| PD7215       | GATA1 | cna | amp     | BASIS    |
| PD8621       | GATA1 | cna | amp     | BASIS    |
| PD8980       | GATA1 | cna | hetloss | BASIS    |
| PD9004       | GATA1 | cna | gain    | BASIS    |
| TCGA-AN-A0XU | GATA2 | cna | gain    | TCGA     |
| TCGA-BH-A0C0 | GATA2 | cna | gain    | TCGA     |
| TCGA-BH-A18R | GATA2 | cna | gain    | TCGA     |
| TCGA-BH-A1FU | GATA2 | cna | hetloss | TCGA     |
| TCGA-C8-A12L | GATA2 | cna | gain    | TCGA     |
| TCGA-E2-A1L7 | GATA2 | cna | hetloss | TCGA     |
| TCGA-LL-A5YP | GATA2 | cna | gain    | TCGA     |
| MB-0346      | GATA2 | cna | hetloss | METABRIC |
| MB-5070      | GATA2 | cna | hetloss | METABRIC |
| MB-5107      | GATA2 | cna | gain    | METABRIC |
| MB-5465      | GATA2 | cna | gain    | METABRIC |
| MB-6098      | GATA2 | cna | hetloss | METABRIC |
| MB-7038      | GATA2 | cna | gain    | METABRIC |
| PD10014      | GATA2 | cna | gain    | BASIS    |
| PD11327      | GATA2 | cna | gain    | BASIS    |
| PD13297      | GATA2 | cna | hetloss | BASIS    |
| PD13299      | GATA2 | cna | gain    | BASIS    |
| PD13771      | GATA2 | cna | hetloss | BASIS    |
| PD22355      | GATA2 | cna | hetloss | BASIS    |
| PD23561      | GATA2 | cna | hetloss | BASIS    |
| PD23574      | GATA2 | cna | gain    | BASIS    |
| PD24186      | GATA2 | cna | gain    | BASIS    |
| PD24206      | GATA2 | cna | gain    | BASIS    |
| PD3905       | GATA2 | cna | gain    | BASIS    |

|              |        |     |         |          |
|--------------|--------|-----|---------|----------|
| PD4005       | GATA2  | cna | hetloss | BASIS    |
| PD4107       | GATA2  | cna | gain    | BASIS    |
| PD4826       | GATA2  | cna | gain    | BASIS    |
| PD5935       | GATA2  | cna | gain    | BASIS    |
| PD5945       | GATA2  | cna | gain    | BASIS    |
| PD5948       | GATA2  | cna | gain    | BASIS    |
| PD6731       | GATA2  | cna | gain    | BASIS    |
| PD7067       | GATA2  | cna | gain    | BASIS    |
| PD7215       | GATA2  | cna | gain    | BASIS    |
| PD8621       | GATA2  | cna | gain    | BASIS    |
| PD8980       | GATA2  | cna | gain    | BASIS    |
| PD9004       | GATA2  | cna | gain    | BASIS    |
| PD9702       | GATA2  | cna | gain    | BASIS    |
| TCGA-A2-A25B | HOXC11 | cna | gain    | TCGA     |
| TCGA-AN-A0XU | HOXC11 | cna | gain    | TCGA     |
| TCGA-AO-A0JL | HOXC11 | cna | hetloss | TCGA     |
| TCGA-BH-A18R | HOXC11 | cna | gain    | TCGA     |
| TCGA-BH-A1FU | HOXC11 | cna | hetloss | TCGA     |
| TCGA-C8-A12L | HOXC11 | cna | gain    | TCGA     |
| TCGA-D8-A27M | HOXC11 | cna | hetloss | TCGA     |
| TCGA-E2-A1L7 | HOXC11 | cna | hetloss | TCGA     |
| TCGA-E9-A1NC | HOXC11 | cna | hetloss | TCGA     |
| TCGA-LL-A5YP | HOXC11 | cna | hetloss | TCGA     |
| MB-0346      | HOXC11 | cna | gain    | METABRIC |
| MB-2827      | HOXC11 | cna | hetloss | METABRIC |
| MB-5070      | HOXC11 | cna | hetloss | METABRIC |
| MB-6060      | HOXC11 | cna | gain    | METABRIC |
| MB-6098      | HOXC11 | cna | hetloss | METABRIC |
| MB-7038      | HOXC11 | cna | hetloss | METABRIC |
| MB-0420      | HOXC11 | cna | hetloss | METABRIC |
| PD11327      | HOXC11 | cna | hetloss | BASIS    |
| PD13296      | HOXC11 | cna | hetloss | BASIS    |
| PD13297      | HOXC11 | cna | hetloss | BASIS    |
| PD23578      | HOXC11 | cna | hetloss | BASIS    |
| PD24202      | HOXC11 | cna | hetloss | BASIS    |
| PD24206      | HOXC11 | cna | gain    | BASIS    |
| PD24337      | HOXC11 | cna | hetloss | BASIS    |
| PD3890       | HOXC11 | cna | hetloss | BASIS    |
| PD3905       | HOXC11 | cna | gain    | BASIS    |
| PD4107       | HOXC11 | cna | hetloss | BASIS    |
| PD4826       | HOXC11 | cna | gain    | BASIS    |
| PD5945       | HOXC11 | cna | gain    | BASIS    |
| PD5948       | HOXC11 | cna | gain    | BASIS    |
| PD6406       | HOXC11 | cna | hetloss | BASIS    |
| PD6413       | HOXC11 | cna | hetloss | BASIS    |
| PD6731       | HOXC11 | cna | hetloss | BASIS    |
| PD7067       | HOXC11 | cna | gain    | BASIS    |

|              |        |     |         |          |
|--------------|--------|-----|---------|----------|
| PD8621       | HOXC11 | cna | hetloss | BASIS    |
| PD9585       | HOXC11 | cna | hetloss | BASIS    |
| PD9702       | HOXC11 | cna | gain    | BASIS    |
| TCGA-A2-A25B | HOXC13 | cna | gain    | TCGA     |
| TCGA-AN-A0XU | HOXC13 | cna | gain    | TCGA     |
| TCGA-AO-A0JL | HOXC13 | cna | hetloss | TCGA     |
| TCGA-BH-A18R | HOXC13 | cna | gain    | TCGA     |
| TCGA-BH-A1FU | HOXC13 | cna | hetloss | TCGA     |
| TCGA-C8-A12L | HOXC13 | cna | gain    | TCGA     |
| TCGA-D8-A27M | HOXC13 | cna | hetloss | TCGA     |
| TCGA-E2-A1L7 | HOXC13 | cna | hetloss | TCGA     |
| TCGA-E9-A1NC | HOXC13 | cna | hetloss | TCGA     |
| TCGA-LL-A5YP | HOXC13 | cna | hetloss | TCGA     |
| MB-0346      | HOXC13 | cna | gain    | METABRIC |
| MB-2827      | HOXC13 | cna | hetloss | METABRIC |
| MB-5070      | HOXC13 | cna | hetloss | METABRIC |
| MB-6060      | HOXC13 | cna | gain    | METABRIC |
| MB-6098      | HOXC13 | cna | hetloss | METABRIC |
| MB-7038      | HOXC13 | cna | hetloss | METABRIC |
| MB-0420      | HOXC13 | cna | hetloss | METABRIC |
| PD11327      | HOXC13 | cna | hetloss | BASIS    |
| PD13296      | HOXC13 | cna | hetloss | BASIS    |
| PD13297      | HOXC13 | cna | hetloss | BASIS    |
| PD23578      | HOXC13 | cna | hetloss | BASIS    |
| PD24202      | HOXC13 | cna | hetloss | BASIS    |
| PD24206      | HOXC13 | cna | gain    | BASIS    |
| PD24337      | HOXC13 | cna | hetloss | BASIS    |
| PD3890       | HOXC13 | cna | hetloss | BASIS    |
| PD3905       | HOXC13 | cna | gain    | BASIS    |
| PD4107       | HOXC13 | cna | hetloss | BASIS    |
| PD4826       | HOXC13 | cna | gain    | BASIS    |
| PD5945       | HOXC13 | cna | gain    | BASIS    |
| PD5948       | HOXC13 | cna | gain    | BASIS    |
| PD6406       | HOXC13 | cna | hetloss | BASIS    |
| PD6413       | HOXC13 | cna | hetloss | BASIS    |
| PD6731       | HOXC13 | cna | hetloss | BASIS    |
| PD7067       | HOXC13 | cna | gain    | BASIS    |
| PD8621       | HOXC13 | cna | hetloss | BASIS    |
| PD9585       | HOXC13 | cna | hetloss | BASIS    |
| PD9702       | HOXC13 | cna | gain    | BASIS    |
| TCGA-A2-A25B | IGF2   | cna | hetloss | TCGA     |
| TCGA-AN-A0XU | IGF2   | cna | hetloss | TCGA     |
| TCGA-AO-A0JL | IGF2   | cna | hetloss | TCGA     |
| TCGA-BH-A0C0 | IGF2   | cna | hetloss | TCGA     |
| TCGA-C8-A12L | IGF2   | cna | hetloss | TCGA     |
| TCGA-E2-A1L7 | IGF2   | cna | homdel  | TCGA     |
| TCGA-LL-A5YP | IGF2   | cna | hetloss | TCGA     |

|              |       |     |         |          |
|--------------|-------|-----|---------|----------|
| MB-0346      | IGF2  | cna | hetloss | METABRIC |
| MB-5070      | IGF2  | cna | hetloss | METABRIC |
| MB-6060      | IGF2  | cna | hetloss | METABRIC |
| MB-6098      | IGF2  | cna | hetloss | METABRIC |
| MB-6271      | IGF2  | cna | gain    | METABRIC |
| MB-7032      | IGF2  | cna | gain    | METABRIC |
| MB-7048      | IGF2  | cna | hetloss | METABRIC |
| MB-0420      | IGF2  | cna | hetloss | METABRIC |
| PD10014      | IGF2  | cna | hetloss | BASIS    |
| PD11742      | IGF2  | cna | hetloss | BASIS    |
| PD13296      | IGF2  | cna | hetloss | BASIS    |
| PD13297      | IGF2  | cna | hetloss | BASIS    |
| PD22355      | IGF2  | cna | hetloss | BASIS    |
| PD24202      | IGF2  | cna | hetloss | BASIS    |
| PD24206      | IGF2  | cna | gain    | BASIS    |
| PD3890       | IGF2  | cna | hetloss | BASIS    |
| PD3905       | IGF2  | cna | gain    | BASIS    |
| PD4005       | IGF2  | cna | hetloss | BASIS    |
| PD4006       | IGF2  | cna | gain    | BASIS    |
| PD4107       | IGF2  | cna | gain    | BASIS    |
| PD4826       | IGF2  | cna | gain    | BASIS    |
| PD4967       | IGF2  | cna | gain    | BASIS    |
| PD5935       | IGF2  | cna | gain    | BASIS    |
| PD5945       | IGF2  | cna | gain    | BASIS    |
| PD5948       | IGF2  | cna | gain    | BASIS    |
| PD6413       | IGF2  | cna | hetloss | BASIS    |
| PD6731       | IGF2  | cna | hetloss | BASIS    |
| PD8980       | IGF2  | cna | hetloss | BASIS    |
| PD9004       | IGF2  | cna | hetloss | BASIS    |
| PD9585       | IGF2  | cna | hetloss | BASIS    |
| TCGA-AN-A0XU | IL6ST | cna | hetloss | TCGA     |
| TCGA-AO-A0JL | IL6ST | cna | hetloss | TCGA     |
| TCGA-BH-A0C0 | IL6ST | cna | hetloss | TCGA     |
| TCGA-BH-A18R | IL6ST | cna | gain    | TCGA     |
| TCGA-BH-A1FU | IL6ST | cna | hetloss | TCGA     |
| TCGA-C8-A12L | IL6ST | cna | hetloss | TCGA     |
| TCGA-E2-A1L7 | IL6ST | cna | hetloss | TCGA     |
| TCGA-E9-A1NC | IL6ST | cna | hetloss | TCGA     |
| TCGA-LL-A5YP | IL6ST | cna | amp     | TCGA     |
| MB-0346      | IL6ST | cna | gain    | METABRIC |
| MB-2827      | IL6ST | cna | hetloss | METABRIC |
| MB-5107      | IL6ST | cna | hetloss | METABRIC |
| MB-5465      | IL6ST | cna | hetloss | METABRIC |
| MB-6098      | IL6ST | cna | gain    | METABRIC |
| MB-0420      | IL6ST | cna | hetloss | METABRIC |
| PD10014      | IL6ST | cna | hetloss | BASIS    |
| PD11327      | IL6ST | cna | hetloss | BASIS    |

|              |       |     |         |          |
|--------------|-------|-----|---------|----------|
| PD11742      | IL6ST | cna | hetloss | BASIS    |
| PD13296      | IL6ST | cna | hetloss | BASIS    |
| PD13297      | IL6ST | cna | hetloss | BASIS    |
| PD13771      | IL6ST | cna | hetloss | BASIS    |
| PD23562      | IL6ST | cna | hetloss | BASIS    |
| PD23578      | IL6ST | cna | hetloss | BASIS    |
| PD24186      | IL6ST | cna | gain    | BASIS    |
| PD24202      | IL6ST | cna | hetloss | BASIS    |
| PD24206      | IL6ST | cna | gain    | BASIS    |
| PD3890       | IL6ST | cna | hetloss | BASIS    |
| PD3905       | IL6ST | cna | gain    | BASIS    |
| PD4005       | IL6ST | cna | hetloss | BASIS    |
| PD4006       | IL6ST | cna | hetloss | BASIS    |
| PD5930       | IL6ST | cna | hetloss | BASIS    |
| PD5935       | IL6ST | cna | hetloss | BASIS    |
| PD5948       | IL6ST | cna | hetloss | BASIS    |
| PD7215       | IL6ST | cna | hetloss | BASIS    |
| PD8621       | IL6ST | cna | hetloss | BASIS    |
| PD8980       | IL6ST | cna | hetloss | BASIS    |
| PD9004       | IL6ST | cna | gain    | BASIS    |
| TCGA-A2-A25B | JAK1  | cna | gain    | TCGA     |
| TCGA-AN-A0XU | JAK1  | cna | hetloss | TCGA     |
| TCGA-BH-A0AW | JAK1  | cna | gain    | TCGA     |
| TCGA-BH-A0C0 | JAK1  | cna | hetloss | TCGA     |
| TCGA-BH-A1FU | JAK1  | cna | gain    | TCGA     |
| TCGA-D8-A27M | JAK1  | cna | hetloss | TCGA     |
| TCGA-E2-A1L7 | JAK1  | cna | amp     | TCGA     |
| TCGA-LL-A5YP | JAK1  | cna | hetloss | TCGA     |
| MB-0346      | JAK1  | cna | hetloss | METABRIC |
| MB-6098      | JAK1  | cna | hetloss | METABRIC |
| MB-7038      | JAK1  | cna | gain    | METABRIC |
| PD11327      | JAK1  | cna | gain    | BASIS    |
| PD11742      | JAK1  | cna | hetloss | BASIS    |
| PD13296      | JAK1  | cna | hetloss | BASIS    |
| PD13297      | JAK1  | cna | hetloss | BASIS    |
| PD13299      | JAK1  | cna | gain    | BASIS    |
| PD22355      | JAK1  | cna | hetloss | BASIS    |
| PD23562      | JAK1  | cna | gain    | BASIS    |
| PD23574      | JAK1  | cna | gain    | BASIS    |
| PD24186      | JAK1  | cna | amp     | BASIS    |
| PD24202      | JAK1  | cna | gain    | BASIS    |
| PD24206      | JAK1  | cna | gain    | BASIS    |
| PD3890       | JAK1  | cna | gain    | BASIS    |
| PD3905       | JAK1  | cna | gain    | BASIS    |
| PD4006       | JAK1  | cna | gain    | BASIS    |
| PD4107       | JAK1  | cna | gain    | BASIS    |
| PD4826       | JAK1  | cna | gain    | BASIS    |

|              |       |     |         |          |
|--------------|-------|-----|---------|----------|
| PD5930       | JAK1  | cna | gain    | BASIS    |
| PD5935       | JAK1  | cna | gain    | BASIS    |
| PD5945       | JAK1  | cna | gain    | BASIS    |
| PD5948       | JAK1  | cna | gain    | BASIS    |
| PD7067       | JAK1  | cna | gain    | BASIS    |
| PD7215       | JAK1  | cna | gain    | BASIS    |
| PD8621       | JAK1  | cna | gain    | BASIS    |
| PD9004       | JAK1  | cna | gain    | BASIS    |
| PD9585       | JAK1  | cna | hetloss | BASIS    |
| PD9702       | JAK1  | cna | gain    | BASIS    |
| TCGA-A2-A25B | KCNJ5 | cna | hetloss | TCGA     |
| TCGA-AO-A0JL | KCNJ5 | cna | hetloss | TCGA     |
| TCGA-BH-A0C0 | KCNJ5 | cna | hetloss | TCGA     |
| TCGA-BH-A18R | KCNJ5 | cna | homdel  | TCGA     |
| TCGA-D8-A27M | KCNJ5 | cna | hetloss | TCGA     |
| TCGA-E2-A1L7 | KCNJ5 | cna | hetloss | TCGA     |
| TCGA-E9-A1NC | KCNJ5 | cna | hetloss | TCGA     |
| TCGA-EW-A10X | KCNJ5 | cna | homdel  | TCGA     |
| TCGA-LL-A5YP | KCNJ5 | cna | gain    | TCGA     |
| MB-0346      | KCNJ5 | cna | hetloss | METABRIC |
| MB-5107      | KCNJ5 | cna | hetloss | METABRIC |
| MB-6271      | KCNJ5 | cna | hetloss | METABRIC |
| PD11327      | KCNJ5 | cna | gain    | BASIS    |
| PD11742      | KCNJ5 | cna | hetloss | BASIS    |
| PD13296      | KCNJ5 | cna | hetloss | BASIS    |
| PD13297      | KCNJ5 | cna | hetloss | BASIS    |
| PD13771      | KCNJ5 | cna | hetloss | BASIS    |
| PD22355      | KCNJ5 | cna | hetloss | BASIS    |
| PD23574      | KCNJ5 | cna | gain    | BASIS    |
| PD23578      | KCNJ5 | cna | hetloss | BASIS    |
| PD24186      | KCNJ5 | cna | gain    | BASIS    |
| PD24202      | KCNJ5 | cna | gain    | BASIS    |
| PD24206      | KCNJ5 | cna | gain    | BASIS    |
| PD24337      | KCNJ5 | cna | hetloss | BASIS    |
| PD3890       | KCNJ5 | cna | hetloss | BASIS    |
| PD3905       | KCNJ5 | cna | gain    | BASIS    |
| PD4005       | KCNJ5 | cna | hetloss | BASIS    |
| PD4826       | KCNJ5 | cna | gain    | BASIS    |
| PD5935       | KCNJ5 | cna | gain    | BASIS    |
| PD5945       | KCNJ5 | cna | amp     | BASIS    |
| PD5948       | KCNJ5 | cna | gain    | BASIS    |
| PD6413       | KCNJ5 | cna | hetloss | BASIS    |
| PD6731       | KCNJ5 | cna | hetloss | BASIS    |
| PD7067       | KCNJ5 | cna | gain    | BASIS    |
| PD7215       | KCNJ5 | cna | gain    | BASIS    |
| PD9004       | KCNJ5 | cna | hetloss | BASIS    |
| PD9702       | KCNJ5 | cna | gain    | BASIS    |

|              |       |     |         |          |
|--------------|-------|-----|---------|----------|
| TCGA-A2-A25B | KDM5C | cna | gain    | TCGA     |
| TCGA-AN-A0XU | KDM5C | cna | hetloss | TCGA     |
| TCGA-AO-A0JL | KDM5C | cna | gain    | TCGA     |
| TCGA-BH-A0AW | KDM5C | cna | gain    | TCGA     |
| TCGA-E2-A1L7 | KDM5C | cna | hetloss | TCGA     |
| TCGA-E9-A1NC | KDM5C | cna | hetloss | TCGA     |
| MB-0346      | KDM5C | cna | gain    | METABRIC |
| MB-2827      | KDM5C | cna | hetloss | METABRIC |
| MB-5465      | KDM5C | cna | gain    | METABRIC |
| MB-6098      | KDM5C | cna | hetloss | METABRIC |
| MB-0420      | KDM5C | cna | hetloss | METABRIC |
| PD10014      | KDM5C | cna | hetloss | BASIS    |
| PD11327      | KDM5C | cna | homdel  | BASIS    |
| PD13296      | KDM5C | cna | gain    | BASIS    |
| PD13297      | KDM5C | cna | gain    | BASIS    |
| PD13299      | KDM5C | cna | gain    | BASIS    |
| PD13771      | KDM5C | cna | gain    | BASIS    |
| PD14442      | KDM5C | cna | gain    | BASIS    |
| PD23562      | KDM5C | cna | hetloss | BASIS    |
| PD23574      | KDM5C | cna | gain    | BASIS    |
| PD24206      | KDM5C | cna | amp     | BASIS    |
| PD3905       | KDM5C | cna | gain    | BASIS    |
| PD4005       | KDM5C | cna | hetloss | BASIS    |
| PD4006       | KDM5C | cna | hetloss | BASIS    |
| PD4107       | KDM5C | cna | gain    | BASIS    |
| PD4826       | KDM5C | cna | gain    | BASIS    |
| PD4967       | KDM5C | cna | gain    | BASIS    |
| PD5935       | KDM5C | cna | gain    | BASIS    |
| PD5945       | KDM5C | cna | gain    | BASIS    |
| PD5948       | KDM5C | cna | gain    | BASIS    |
| PD6406       | KDM5C | cna | gain    | BASIS    |
| PD6413       | KDM5C | cna | gain    | BASIS    |
| PD7067       | KDM5C | cna | gain    | BASIS    |
| PD7215       | KDM5C | cna | amp     | BASIS    |
| PD8621       | KDM5C | cna | amp     | BASIS    |
| PD8980       | KDM5C | cna | hetloss | BASIS    |
| PD9004       | KDM5C | cna | gain    | BASIS    |
| TCGA-A2-A25B | KMT2C | cna | gain    | TCGA     |
| TCGA-AN-A0XU | KMT2C | cna | gain    | TCGA     |
| TCGA-AO-A0JL | KMT2C | cna | gain    | TCGA     |
| TCGA-C8-A12L | KMT2C | cna | hetloss | TCGA     |
| TCGA-D8-A27M | KMT2C | cna | gain    | TCGA     |
| TCGA-E2-A1L7 | KMT2C | cna | hetloss | TCGA     |
| TCGA-E9-A1NC | KMT2C | cna | hetloss | TCGA     |
| TCGA-LL-A5YP | KMT2C | cna | hetloss | TCGA     |
| MB-0346      | KMT2C | cna | hetloss | METABRIC |
| MB-5070      | KMT2C | cna | hetloss | METABRIC |



|              |       |     |         |          |
|--------------|-------|-----|---------|----------|
| MB-6098      | KMT2C | cna | gain    | METABRIC |
| MB-7038      | KMT2C | cna | gain    | METABRIC |
| MB-0420      | KMT2C | cna | hetloss | METABRIC |
| PD10014      | KMT2C | cna | gain    | BASIS    |
| PD13296      | KMT2C | cna | hetloss | BASIS    |
| PD13297      | KMT2C | cna | gain    | BASIS    |
| PD22355      | KMT2C | cna | hetloss | BASIS    |
| PD23562      | KMT2C | cna | gain    | BASIS    |
| PD23574      | KMT2C | cna | gain    | BASIS    |
| PD23578      | KMT2C | cna | hetloss | BASIS    |
| PD24186      | KMT2C | cna | gain    | BASIS    |
| PD24202      | KMT2C | cna | gain    | BASIS    |
| PD24337      | KMT2C | cna | hetloss | BASIS    |
| PD3890       | KMT2C | cna | hetloss | BASIS    |
| PD3905       | KMT2C | cna | gain    | BASIS    |
| PD4006       | KMT2C | cna | amp     | BASIS    |
| PD4107       | KMT2C | cna | gain    | BASIS    |
| PD5930       | KMT2C | cna | gain    | BASIS    |
| PD5945       | KMT2C | cna | amp     | BASIS    |
| PD5948       | KMT2C | cna | gain    | BASIS    |
| PD6406       | KMT2C | cna | gain    | BASIS    |
| PD6731       | KMT2C | cna | hetloss | BASIS    |
| PD7067       | KMT2C | cna | gain    | BASIS    |
| PD7215       | KMT2C | cna | gain    | BASIS    |
| PD9004       | KMT2C | cna | gain    | BASIS    |
| PD9585       | KMT2C | cna | hetloss | BASIS    |
| PD9702       | KMT2C | cna | gain    | BASIS    |
| TCGA-A2-A25B | KTN1  | cna | hetloss | TCGA     |
| TCGA-AO-A0JL | KTN1  | cna | hetloss | TCGA     |
| TCGA-BH-A0AW | KTN1  | cna | hetloss | TCGA     |
| TCGA-BH-A1FU | KTN1  | cna | gain    | TCGA     |
| TCGA-C8-A12L | KTN1  | cna | hetloss | TCGA     |
| TCGA-D8-A27M | KTN1  | cna | hetloss | TCGA     |
| TCGA-LL-A5YP | KTN1  | cna | hetloss | TCGA     |
| MB-2827      | KTN1  | cna | hetloss | METABRIC |
| MB-5070      | KTN1  | cna | hetloss | METABRIC |
| MB-5465      | KTN1  | cna | hetloss | METABRIC |
| MB-6060      | KTN1  | cna | gain    | METABRIC |
| MB-7038      | KTN1  | cna | hetloss | METABRIC |
| PD10014      | KTN1  | cna | hetloss | BASIS    |
| PD11327      | KTN1  | cna | gain    | BASIS    |
| PD13296      | KTN1  | cna | hetloss | BASIS    |
| PD13297      | KTN1  | cna | hetloss | BASIS    |
| PD22355      | KTN1  | cna | hetloss | BASIS    |
| PD23574      | KTN1  | cna | hetloss | BASIS    |
| PD23578      | KTN1  | cna | hetloss | BASIS    |
| PD24202      | KTN1  | cna | hetloss | BASIS    |

|              |      |     |         |          |
|--------------|------|-----|---------|----------|
| PD24206      | KTN1 | cna | gain    | BASIS    |
| PD24337      | KTN1 | cna | hetloss | BASIS    |
| PD3890       | KTN1 | cna | hetloss | BASIS    |
| PD3905       | KTN1 | cna | gain    | BASIS    |
| PD4005       | KTN1 | cna | hetloss | BASIS    |
| PD4006       | KTN1 | cna | hetloss | BASIS    |
| PD4107       | KTN1 | cna | hetloss | BASIS    |
| PD5930       | KTN1 | cna | hetloss | BASIS    |
| PD5945       | KTN1 | cna | gain    | BASIS    |
| PD5948       | KTN1 | cna | hetloss | BASIS    |
| PD6406       | KTN1 | cna | hetloss | BASIS    |
| PD7067       | KTN1 | cna | gain    | BASIS    |
| PD7215       | KTN1 | cna | gain    | BASIS    |
| PD8621       | KTN1 | cna | hetloss | BASIS    |
| PD9004       | KTN1 | cna | gain    | BASIS    |
| PD9585       | KTN1 | cna | gain    | BASIS    |
| PD9702       | KTN1 | cna | gain    | BASIS    |
| TCGA-A2-A25B | LPP  | cna | amp     | TCGA     |
| TCGA-AN-A0XU | LPP  | cna | gain    | TCGA     |
| TCGA-BH-A0AW | LPP  | cna | gain    | TCGA     |
| TCGA-BH-A0C0 | LPP  | cna | gain    | TCGA     |
| TCGA-BH-A1FU | LPP  | cna | hetloss | TCGA     |
| TCGA-C8-A12L | LPP  | cna | gain    | TCGA     |
| TCGA-LL-A5YP | LPP  | cna | gain    | TCGA     |
| MB-0346      | LPP  | cna | gain    | METABRIC |
| MB-5070      | LPP  | cna | hetloss | METABRIC |
| MB-5107      | LPP  | cna | amp     | METABRIC |
| MB-5465      | LPP  | cna | gain    | METABRIC |
| MB-6060      | LPP  | cna | gain    | METABRIC |
| MB-6098      | LPP  | cna | gain    | METABRIC |
| MB-7038      | LPP  | cna | hetloss | METABRIC |
| PD11327      | LPP  | cna | gain    | BASIS    |
| PD13299      | LPP  | cna | gain    | BASIS    |
| PD22355      | LPP  | cna | gain    | BASIS    |
| PD23561      | LPP  | cna | hetloss | BASIS    |
| PD23562      | LPP  | cna | gain    | BASIS    |
| PD23578      | LPP  | cna | gain    | BASIS    |
| PD24186      | LPP  | cna | amp     | BASIS    |
| PD24202      | LPP  | cna | gain    | BASIS    |
| PD3905       | LPP  | cna | gain    | BASIS    |
| PD4005       | LPP  | cna | gain    | BASIS    |
| PD4107       | LPP  | cna | gain    | BASIS    |
| PD4826       | LPP  | cna | gain    | BASIS    |
| PD5930       | LPP  | cna | gain    | BASIS    |
| PD5945       | LPP  | cna | amp     | BASIS    |
| PD5948       | LPP  | cna | gain    | BASIS    |
| PD6406       | LPP  | cna | gain    | BASIS    |

|              |        |     |         |          |
|--------------|--------|-----|---------|----------|
| PD6731       | LPP    | cna | gain    | BASIS    |
| PD7067       | LPP    | cna | gain    | BASIS    |
| PD7215       | LPP    | cna | gain    | BASIS    |
| PD8621       | LPP    | cna | gain    | BASIS    |
| PD8980       | LPP    | cna | gain    | BASIS    |
| PD9004       | LPP    | cna | gain    | BASIS    |
| PD9702       | LPP    | cna | amp     | BASIS    |
| TCGA-AN-A0XU | MAP2K2 | cna | hetloss | TCGA     |
| TCGA-AO-A0JL | MAP2K2 | cna | gain    | TCGA     |
| TCGA-BH-A0C0 | MAP2K2 | cna | gain    | TCGA     |
| TCGA-BH-A1FU | MAP2K2 | cna | hetloss | TCGA     |
| TCGA-C8-A12L | MAP2K2 | cna | amp     | TCGA     |
| TCGA-D8-A27M | MAP2K2 | cna | hetloss | TCGA     |
| TCGA-E9-A1NC | MAP2K2 | cna | hetloss | TCGA     |
| TCGA-EW-A10X | MAP2K2 | cna | hetloss | TCGA     |
| TCGA-LL-A5YP | MAP2K2 | cna | hetloss | TCGA     |
| MB-0346      | MAP2K2 | cna | gain    | METABRIC |
| MB-2827      | MAP2K2 | cna | hetloss | METABRIC |
| MB-5070      | MAP2K2 | cna | hetloss | METABRIC |
| MB-5465      | MAP2K2 | cna | gain    | METABRIC |
| MB-6060      | MAP2K2 | cna | gain    | METABRIC |
| MB-6098      | MAP2K2 | cna | hetloss | METABRIC |
| MB-7038      | MAP2K2 | cna | hetloss | METABRIC |
| MB-0420      | MAP2K2 | cna | hetloss | METABRIC |
| PD10014      | MAP2K2 | cna | hetloss | BASIS    |
| PD11742      | MAP2K2 | cna | hetloss | BASIS    |
| PD14442      | MAP2K2 | cna | hetloss | BASIS    |
| PD22355      | MAP2K2 | cna | hetloss | BASIS    |
| PD23574      | MAP2K2 | cna | gain    | BASIS    |
| PD23578      | MAP2K2 | cna | hetloss | BASIS    |
| PD24202      | MAP2K2 | cna | gain    | BASIS    |
| PD24206      | MAP2K2 | cna | hetloss | BASIS    |
| PD3905       | MAP2K2 | cna | gain    | BASIS    |
| PD4006       | MAP2K2 | cna | gain    | BASIS    |
| PD4826       | MAP2K2 | cna | gain    | BASIS    |
| PD4967       | MAP2K2 | cna | hetloss | BASIS    |
| PD5930       | MAP2K2 | cna | gain    | BASIS    |
| PD5945       | MAP2K2 | cna | gain    | BASIS    |
| PD5948       | MAP2K2 | cna | gain    | BASIS    |
| PD7067       | MAP2K2 | cna | gain    | BASIS    |
| PD8621       | MAP2K2 | cna | gain    | BASIS    |
| PD8980       | MAP2K2 | cna | gain    | BASIS    |
| PD9004       | MAP2K2 | cna | hetloss | BASIS    |
| PD9702       | MAP2K2 | cna | gain    | BASIS    |
| TCGA-A2-A25B | MAP2K4 | cna | hetloss | TCGA     |
| TCGA-AN-A0XU | MAP2K4 | cna | hetloss | TCGA     |
| TCGA-AO-A0JL | MAP2K4 | cna | gain    | TCGA     |

|              |        |     |         |          |
|--------------|--------|-----|---------|----------|
| TCGA-BH-A0AW | MAP2K4 | cna | hetloss | TCGA     |
| TCGA-BH-A0C0 | MAP2K4 | cna | hetloss | TCGA     |
| TCGA-C8-A12L | MAP2K4 | cna | hetloss | TCGA     |
| TCGA-D8-A27M | MAP2K4 | cna | hetloss | TCGA     |
| TCGA-E2-A1L7 | MAP2K4 | cna | hetloss | TCGA     |
| TCGA-E9-A1NC | MAP2K4 | cna | hetloss | TCGA     |
| TCGA-LL-A5YP | MAP2K4 | cna | gain    | TCGA     |
| MB-0346      | MAP2K4 | cna | hetloss | METABRIC |
| MB-2827      | MAP2K4 | cna | hetloss | METABRIC |
| MB-5070      | MAP2K4 | cna | hetloss | METABRIC |
| MB-5107      | MAP2K4 | cna | hetloss | METABRIC |
| MB-6098      | MAP2K4 | cna | hetloss | METABRIC |
| MB-6271      | MAP2K4 | cna | hetloss | METABRIC |
| MB-7048      | MAP2K4 | cna | hetloss | METABRIC |
| MB-0420      | MAP2K4 | cna | hetloss | METABRIC |
| PD11742      | MAP2K4 | cna | hetloss | BASIS    |
| PD13296      | MAP2K4 | cna | hetloss | BASIS    |
| PD13771      | MAP2K4 | cna | hetloss | BASIS    |
| PD22355      | MAP2K4 | cna | hetloss | BASIS    |
| PD23561      | MAP2K4 | cna | hetloss | BASIS    |
| PD24202      | MAP2K4 | cna | hetloss | BASIS    |
| PD24206      | MAP2K4 | cna | homdel  | BASIS    |
| PD24337      | MAP2K4 | cna | hetloss | BASIS    |
| PD3890       | MAP2K4 | cna | hetloss | BASIS    |
| PD3905       | MAP2K4 | cna | gain    | BASIS    |
| PD4005       | MAP2K4 | cna | homdel  | BASIS    |
| PD4826       | MAP2K4 | cna | hetloss | BASIS    |
| PD4967       | MAP2K4 | cna | hetloss | BASIS    |
| PD5945       | MAP2K4 | cna | gain    | BASIS    |
| PD6406       | MAP2K4 | cna | hetloss | BASIS    |
| PD6413       | MAP2K4 | cna | hetloss | BASIS    |
| PD6731       | MAP2K4 | cna | hetloss | BASIS    |
| PD7067       | MAP2K4 | cna | gain    | BASIS    |
| PD9585       | MAP2K4 | cna | hetloss | BASIS    |
| TCGA-A2-A25B | MET    | cna | gain    | TCGA     |
| TCGA-AO-A0JL | MET    | cna | gain    | TCGA     |
| TCGA-BH-A0AW | MET    | cna | gain    | TCGA     |
| TCGA-C8-A12L | MET    | cna | hetloss | TCGA     |
| TCGA-D8-A27M | MET    | cna | gain    | TCGA     |
| TCGA-E2-A1L7 | MET    | cna | hetloss | TCGA     |
| TCGA-E9-A1NC | MET    | cna | gain    | TCGA     |
| TCGA-LL-A5YP | MET    | cna | gain    | TCGA     |
| MB-0346      | MET    | cna | hetloss | METABRIC |
| MB-5465      | MET    | cna | gain    | METABRIC |
| MB-7038      | MET    | cna | gain    | METABRIC |
| MB-7048      | MET    | cna | gain    | METABRIC |
| PD11327      | MET    | cna | gain    | BASIS    |

|              |      |     |         |          |
|--------------|------|-----|---------|----------|
| PD13296      | MET  | cna | hetloss | BASIS    |
| PD13297      | MET  | cna | gain    | BASIS    |
| PD13299      | MET  | cna | gain    | BASIS    |
| PD22355      | MET  | cna | hetloss | BASIS    |
| PD23574      | MET  | cna | gain    | BASIS    |
| PD23578      | MET  | cna | gain    | BASIS    |
| PD24186      | MET  | cna | amp     | BASIS    |
| PD24337      | MET  | cna | hetloss | BASIS    |
| PD3890       | MET  | cna | hetloss | BASIS    |
| PD3905       | MET  | cna | gain    | BASIS    |
| PD4005       | MET  | cna | hetloss | BASIS    |
| PD4107       | MET  | cna | gain    | BASIS    |
| PD4826       | MET  | cna | gain    | BASIS    |
| PD5930       | MET  | cna | gain    | BASIS    |
| PD5935       | MET  | cna | gain    | BASIS    |
| PD5945       | MET  | cna | amp     | BASIS    |
| PD5948       | MET  | cna | gain    | BASIS    |
| PD6406       | MET  | cna | gain    | BASIS    |
| PD7067       | MET  | cna | gain    | BASIS    |
| PD7215       | MET  | cna | gain    | BASIS    |
| PD8621       | MET  | cna | gain    | BASIS    |
| PD9004       | MET  | cna | gain    | BASIS    |
| PD9585       | MET  | cna | hetloss | BASIS    |
| PD9702       | MET  | cna | amp     | BASIS    |
| TCGA-A2-A25B | MYCN | cna | hetloss | TCGA     |
| TCGA-AN-A0XU | MYCN | cna | hetloss | TCGA     |
| TCGA-BH-A0AW | MYCN | cna | gain    | TCGA     |
| TCGA-BH-A0C0 | MYCN | cna | gain    | TCGA     |
| TCGA-C8-A12L | MYCN | cna | gain    | TCGA     |
| TCGA-D8-A27M | MYCN | cna | hetloss | TCGA     |
| TCGA-E9-A1NC | MYCN | cna | hetloss | TCGA     |
| TCGA-LL-A5YP | MYCN | cna | gain    | TCGA     |
| MB-0346      | MYCN | cna | amp     | METABRIC |
| MB-5070      | MYCN | cna | gain    | METABRIC |
| MB-5465      | MYCN | cna | amp     | METABRIC |
| MB-6098      | MYCN | cna | hetloss | METABRIC |
| MB-6271      | MYCN | cna | hetloss | METABRIC |
| MB-7038      | MYCN | cna | gain    | METABRIC |
| MB-0420      | MYCN | cna | hetloss | METABRIC |
| MTS-T0064    | MYCN | cna | hetloss | METABRIC |
| PD10014      | MYCN | cna | gain    | BASIS    |
| PD11327      | MYCN | cna | gain    | BASIS    |
| PD13297      | MYCN | cna | hetloss | BASIS    |
| PD13299      | MYCN | cna | gain    | BASIS    |
| PD13771      | MYCN | cna | hetloss | BASIS    |
| PD22355      | MYCN | cna | gain    | BASIS    |
| PD24186      | MYCN | cna | amp     | BASIS    |

|              |       |     |         |          |
|--------------|-------|-----|---------|----------|
| PD24206      | MYCN  | cna | gain    | BASIS    |
| PD3890       | MYCN  | cna | hetloss | BASIS    |
| PD3905       | MYCN  | cna | gain    | BASIS    |
| PD4005       | MYCN  | cna | hetloss | BASIS    |
| PD4006       | MYCN  | cna | hetloss | BASIS    |
| PD4826       | MYCN  | cna | hetloss | BASIS    |
| PD5930       | MYCN  | cna | gain    | BASIS    |
| PD5935       | MYCN  | cna | gain    | BASIS    |
| PD5945       | MYCN  | cna | gain    | BASIS    |
| PD5948       | MYCN  | cna | gain    | BASIS    |
| PD6406       | MYCN  | cna | hetloss | BASIS    |
| PD7067       | MYCN  | cna | gain    | BASIS    |
| PD9004       | MYCN  | cna | gain    | BASIS    |
| PD9702       | MYCN  | cna | gain    | BASIS    |
| TCGA-A2-A25B | NUMA1 | cna | hetloss | TCGA     |
| TCGA-AN-A0XU | NUMA1 | cna | hetloss | TCGA     |
| TCGA-AO-A0JL | NUMA1 | cna | hetloss | TCGA     |
| TCGA-BH-A18R | NUMA1 | cna | homdel  | TCGA     |
| TCGA-C8-A12L | NUMA1 | cna | amp     | TCGA     |
| TCGA-D8-A27M | NUMA1 | cna | gain    | TCGA     |
| TCGA-EW-A10X | NUMA1 | cna | amp     | TCGA     |
| TCGA-LL-A5YP | NUMA1 | cna | hetloss | TCGA     |
| MB-0346      | NUMA1 | cna | gain    | METABRIC |
| MB-5107      | NUMA1 | cna | gain    | METABRIC |
| MB-6060      | NUMA1 | cna | gain    | METABRIC |
| MB-6271      | NUMA1 | cna | hetloss | METABRIC |
| MB-7032      | NUMA1 | cna | hetloss | METABRIC |
| MTS-T0064    | NUMA1 | cna | gain    | METABRIC |
| PD10014      | NUMA1 | cna | gain    | BASIS    |
| PD11327      | NUMA1 | cna | gain    | BASIS    |
| PD11742      | NUMA1 | cna | gain    | BASIS    |
| PD22355      | NUMA1 | cna | hetloss | BASIS    |
| PD23574      | NUMA1 | cna | gain    | BASIS    |
| PD24186      | NUMA1 | cna | amp     | BASIS    |
| PD24206      | NUMA1 | cna | gain    | BASIS    |
| PD3905       | NUMA1 | cna | gain    | BASIS    |
| PD4005       | NUMA1 | cna | gain    | BASIS    |
| PD4006       | NUMA1 | cna | amp     | BASIS    |
| PD4107       | NUMA1 | cna | gain    | BASIS    |
| PD4826       | NUMA1 | cna | gain    | BASIS    |
| PD5930       | NUMA1 | cna | gain    | BASIS    |
| PD5935       | NUMA1 | cna | gain    | BASIS    |
| PD5945       | NUMA1 | cna | amp     | BASIS    |
| PD5948       | NUMA1 | cna | gain    | BASIS    |
| PD6413       | NUMA1 | cna | gain    | BASIS    |
| PD7067       | NUMA1 | cna | gain    | BASIS    |
| PD7215       | NUMA1 | cna | gain    | BASIS    |

|              |        |     |         |          |
|--------------|--------|-----|---------|----------|
| PD8980       | NUMA1  | cna | gain    | BASIS    |
| PD9004       | NUMA1  | cna | gain    | BASIS    |
| PD9585       | NUMA1  | cna | hetloss | BASIS    |
| PD9702       | NUMA1  | cna | gain    | BASIS    |
| TCGA-AO-A0JL | NUTM1  | cna | hetloss | TCGA     |
| TCGA-BH-A0AW | NUTM1  | cna | gain    | TCGA     |
| TCGA-BH-A0C0 | NUTM1  | cna | hetloss | TCGA     |
| TCGA-C8-A12L | NUTM1  | cna | hetloss | TCGA     |
| TCGA-D8-A27M | NUTM1  | cna | hetloss | TCGA     |
| TCGA-E2-A1L7 | NUTM1  | cna | hetloss | TCGA     |
| TCGA-E9-A1NC | NUTM1  | cna | hetloss | TCGA     |
| TCGA-LL-A5YP | NUTM1  | cna | hetloss | TCGA     |
| MB-2827      | NUTM1  | cna | hetloss | METABRIC |
| MB-5070      | NUTM1  | cna | hetloss | METABRIC |
| MB-5465      | NUTM1  | cna | hetloss | METABRIC |
| MB-6060      | NUTM1  | cna | hetloss | METABRIC |
| MB-6098      | NUTM1  | cna | hetloss | METABRIC |
| MB-7038      | NUTM1  | cna | hetloss | METABRIC |
| MB-0420      | NUTM1  | cna | hetloss | METABRIC |
| PD10014      | NUTM1  | cna | hetloss | BASIS    |
| PD11327      | NUTM1  | cna | hetloss | BASIS    |
| PD11742      | NUTM1  | cna | hetloss | BASIS    |
| PD13297      | NUTM1  | cna | hetloss | BASIS    |
| PD13299      | NUTM1  | cna | hetloss | BASIS    |
| PD23574      | NUTM1  | cna | hetloss | BASIS    |
| PD23578      | NUTM1  | cna | hetloss | BASIS    |
| PD24202      | NUTM1  | cna | hetloss | BASIS    |
| PD24206      | NUTM1  | cna | gain    | BASIS    |
| PD3890       | NUTM1  | cna | hetloss | BASIS    |
| PD3905       | NUTM1  | cna | gain    | BASIS    |
| PD4005       | NUTM1  | cna | homdel  | BASIS    |
| PD4107       | NUTM1  | cna | hetloss | BASIS    |
| PD5930       | NUTM1  | cna | hetloss | BASIS    |
| PD5935       | NUTM1  | cna | gain    | BASIS    |
| PD5945       | NUTM1  | cna | amp     | BASIS    |
| PD6413       | NUTM1  | cna | hetloss | BASIS    |
| PD7067       | NUTM1  | cna | gain    | BASIS    |
| PD7215       | NUTM1  | cna | gain    | BASIS    |
| PD9004       | NUTM1  | cna | hetloss | BASIS    |
| PD9585       | NUTM1  | cna | hetloss | BASIS    |
| PD9702       | NUTM1  | cna | gain    | BASIS    |
| TCGA-A2-A25B | NUTM2A | cna | hetloss | TCGA     |
| TCGA-AN-A0XU | NUTM2A | cna | hetloss | TCGA     |
| TCGA-AO-A0JL | NUTM2A | cna | hetloss | TCGA     |
| TCGA-BH-A0AW | NUTM2A | cna | gain    | TCGA     |
| TCGA-BH-A18R | NUTM2A | cna | gain    | TCGA     |
| TCGA-C8-A12L | NUTM2A | cna | hetloss | TCGA     |

|              |        |     |         |          |
|--------------|--------|-----|---------|----------|
| TCGA-D8-A27M | NUTM2A | cna | hetloss | TCGA     |
| TCGA-E2-A1L7 | NUTM2A | cna | hetloss | TCGA     |
| MB-2827      | NUTM2A | cna | hetloss | METABRIC |
| MB-5070      | NUTM2A | cna | hetloss | METABRIC |
| MB-6060      | NUTM2A | cna | hetloss | METABRIC |
| MB-6098      | NUTM2A | cna | hetloss | METABRIC |
| MB-7048      | NUTM2A | cna | hetloss | METABRIC |
| MTS-T0064    | NUTM2A | cna | gain    | METABRIC |
| PD10014      | NUTM2A | cna | hetloss | BASIS    |
| PD11327      | NUTM2A | cna | hetloss | BASIS    |
| PD11742      | NUTM2A | cna | hetloss | BASIS    |
| PD13296      | NUTM2A | cna | hetloss | BASIS    |
| PD13299      | NUTM2A | cna | gain    | BASIS    |
| PD23562      | NUTM2A | cna | gain    | BASIS    |
| PD23574      | NUTM2A | cna | gain    | BASIS    |
| PD23578      | NUTM2A | cna | hetloss | BASIS    |
| PD24202      | NUTM2A | cna | hetloss | BASIS    |
| PD24206      | NUTM2A | cna | gain    | BASIS    |
| PD3890       | NUTM2A | cna | hetloss | BASIS    |
| PD3905       | NUTM2A | cna | gain    | BASIS    |
| PD4006       | NUTM2A | cna | gain    | BASIS    |
| PD4107       | NUTM2A | cna | gain    | BASIS    |
| PD5935       | NUTM2A | cna | homdel  | BASIS    |
| PD6406       | NUTM2A | cna | hetloss | BASIS    |
| PD6731       | NUTM2A | cna | hetloss | BASIS    |
| PD7215       | NUTM2A | cna | gain    | BASIS    |
| PD8621       | NUTM2A | cna | hetloss | BASIS    |
| PD8980       | NUTM2A | cna | hetloss | BASIS    |
| PD9004       | NUTM2A | cna | gain    | BASIS    |
| PD9585       | NUTM2A | cna | hetloss | BASIS    |
| PD9702       | NUTM2A | cna | gain    | BASIS    |
| TCGA-A2-A25B | PAK3   | cna | hetloss | TCGA     |
| TCGA-AN-A0XU | PAK3   | cna | hetloss | TCGA     |
| TCGA-BH-A0AW | PAK3   | cna | gain    | TCGA     |
| TCGA-C8-A12L | PAK3   | cna | hetloss | TCGA     |
| TCGA-E2-A1L7 | PAK3   | cna | hetloss | TCGA     |
| TCGA-E9-A1NC | PAK3   | cna | hetloss | TCGA     |
| MB-0346      | PAK3   | cna | hetloss | METABRIC |
| MB-2827      | PAK3   | cna | hetloss | METABRIC |
| MB-5465      | PAK3   | cna | gain    | METABRIC |
| MB-6098      | PAK3   | cna | hetloss | METABRIC |
| PD10014      | PAK3   | cna | hetloss | BASIS    |
| PD13296      | PAK3   | cna | hetloss | BASIS    |
| PD13297      | PAK3   | cna | gain    | BASIS    |
| PD13299      | PAK3   | cna | amp     | BASIS    |
| PD13771      | PAK3   | cna | gain    | BASIS    |
| PD14442      | PAK3   | cna | gain    | BASIS    |



|              |       |     |         |          |
|--------------|-------|-----|---------|----------|
| PD22355      | PAK3  | cna | gain    | BASIS    |
| PD23562      | PAK3  | cna | hetloss | BASIS    |
| PD23574      | PAK3  | cna | gain    | BASIS    |
| PD23578      | PAK3  | cna | hetloss | BASIS    |
| PD24202      | PAK3  | cna | hetloss | BASIS    |
| PD24206      | PAK3  | cna | gain    | BASIS    |
| PD3905       | PAK3  | cna | gain    | BASIS    |
| PD4005       | PAK3  | cna | gain    | BASIS    |
| PD4006       | PAK3  | cna | gain    | BASIS    |
| PD4107       | PAK3  | cna | gain    | BASIS    |
| PD4826       | PAK3  | cna | gain    | BASIS    |
| PD4967       | PAK3  | cna | gain    | BASIS    |
| PD5930       | PAK3  | cna | gain    | BASIS    |
| PD5945       | PAK3  | cna | gain    | BASIS    |
| PD6406       | PAK3  | cna | gain    | BASIS    |
| PD6413       | PAK3  | cna | gain    | BASIS    |
| PD7067       | PAK3  | cna | gain    | BASIS    |
| PD7215       | PAK3  | cna | amp     | BASIS    |
| PD8621       | PAK3  | cna | amp     | BASIS    |
| PD8980       | PAK3  | cna | hetloss | BASIS    |
| PD9004       | PAK3  | cna | gain    | BASIS    |
| TCGA-AN-A0XU | PARP4 | cna | hetloss | TCGA     |
| TCGA-AO-A0JL | PARP4 | cna | hetloss | TCGA     |
| TCGA-BH-A0AW | PARP4 | cna | hetloss | TCGA     |
| TCGA-BH-A0C0 | PARP4 | cna | gain    | TCGA     |
| TCGA-BH-A1FU | PARP4 | cna | hetloss | TCGA     |
| TCGA-C8-A12L | PARP4 | cna | hetloss | TCGA     |
| TCGA-D8-A27M | PARP4 | cna | gain    | TCGA     |
| TCGA-E9-A1NC | PARP4 | cna | hetloss | TCGA     |
| TCGA-EW-A10X | PARP4 | cna | homdel  | TCGA     |
| TCGA-LL-A5YP | PARP4 | cna | hetloss | TCGA     |
| MB-0346      | PARP4 | cna | hetloss | METABRIC |
| MB-2827      | PARP4 | cna | hetloss | METABRIC |
| MB-6098      | PARP4 | cna | hetloss | METABRIC |
| MB-7032      | PARP4 | cna | gain    | METABRIC |
| PD10014      | PARP4 | cna | hetloss | BASIS    |
| PD13296      | PARP4 | cna | hetloss | BASIS    |
| PD13297      | PARP4 | cna | hetloss | BASIS    |
| PD13771      | PARP4 | cna | hetloss | BASIS    |
| PD14442      | PARP4 | cna | hetloss | BASIS    |
| PD22355      | PARP4 | cna | hetloss | BASIS    |
| PD24202      | PARP4 | cna | hetloss | BASIS    |
| PD24206      | PARP4 | cna | gain    | BASIS    |
| PD24337      | PARP4 | cna | hetloss | BASIS    |
| PD3890       | PARP4 | cna | hetloss | BASIS    |
| PD3905       | PARP4 | cna | gain    | BASIS    |
| PD4005       | PARP4 | cna | hetloss | BASIS    |

|              |       |     |         |          |
|--------------|-------|-----|---------|----------|
| PD4006       | PARP4 | cna | gain    | BASIS    |
| PD4107       | PARP4 | cna | gain    | BASIS    |
| PD4826       | PARP4 | cna | hetloss | BASIS    |
| PD4967       | PARP4 | cna | hetloss | BASIS    |
| PD5945       | PARP4 | cna | amp     | BASIS    |
| PD6406       | PARP4 | cna | hetloss | BASIS    |
| PD6413       | PARP4 | cna | hetloss | BASIS    |
| PD6731       | PARP4 | cna | hetloss | BASIS    |
| PD7067       | PARP4 | cna | gain    | BASIS    |
| PD8980       | PARP4 | cna | hetloss | BASIS    |
| PD9702       | PARP4 | cna | gain    | BASIS    |
| TCGA-A2-A25B | PAX7  | cna | hetloss | TCGA     |
| TCGA-AN-A0XU | PAX7  | cna | hetloss | TCGA     |
| TCGA-AO-A0JL | PAX7  | cna | hetloss | TCGA     |
| TCGA-BH-A0AW | PAX7  | cna | gain    | TCGA     |
| TCGA-BH-A0C0 | PAX7  | cna | hetloss | TCGA     |
| TCGA-BH-A18R | PAX7  | cna | homdel  | TCGA     |
| TCGA-BH-A1FU | PAX7  | cna | gain    | TCGA     |
| TCGA-C8-A12L | PAX7  | cna | hetloss | TCGA     |
| TCGA-D8-A27M | PAX7  | cna | gain    | TCGA     |
| TCGA-E2-A1L7 | PAX7  | cna | hetloss | TCGA     |
| TCGA-E9-A1NC | PAX7  | cna | hetloss | TCGA     |
| TCGA-LL-A5YP | PAX7  | cna | hetloss | TCGA     |
| MB-2827      | PAX7  | cna | hetloss | METABRIC |
| MB-5070      | PAX7  | cna | hetloss | METABRIC |
| MB-5465      | PAX7  | cna | hetloss | METABRIC |
| MB-6060      | PAX7  | cna | hetloss | METABRIC |
| MB-6098      | PAX7  | cna | hetloss | METABRIC |
| MB-6271      | PAX7  | cna | hetloss | METABRIC |
| MB-0420      | PAX7  | cna | hetloss | METABRIC |
| PD10014      | PAX7  | cna | gain    | BASIS    |
| PD11742      | PAX7  | cna | hetloss | BASIS    |
| PD13296      | PAX7  | cna | hetloss | BASIS    |
| PD13771      | PAX7  | cna | hetloss | BASIS    |
| PD22355      | PAX7  | cna | hetloss | BASIS    |
| PD24202      | PAX7  | cna | hetloss | BASIS    |
| PD24206      | PAX7  | cna | gain    | BASIS    |
| PD24337      | PAX7  | cna | hetloss | BASIS    |
| PD3890       | PAX7  | cna | hetloss | BASIS    |
| PD3905       | PAX7  | cna | gain    | BASIS    |
| PD4826       | PAX7  | cna | gain    | BASIS    |
| PD5945       | PAX7  | cna | gain    | BASIS    |
| PD6406       | PAX7  | cna | hetloss | BASIS    |
| PD6413       | PAX7  | cna | hetloss | BASIS    |
| PD7067       | PAX7  | cna | gain    | BASIS    |
| PD7215       | PAX7  | cna | gain    | BASIS    |
| PD9004       | PAX7  | cna | hetloss | BASIS    |

|              |          |     |         |          |
|--------------|----------|-----|---------|----------|
| PD9585       | PAX7     | cna | hetloss | BASIS    |
| TCGA-A2-A25B | PDCD1LG2 | cna | hetloss | TCGA     |
| TCGA-AO-A0JL | PDCD1LG2 | cna | gain    | TCGA     |
| TCGA-BH-A0AW | PDCD1LG2 | cna | hetloss | TCGA     |
| TCGA-BH-A0C0 | PDCD1LG2 | cna | hetloss | TCGA     |
| TCGA-BH-A1FU | PDCD1LG2 | cna | hetloss | TCGA     |
| TCGA-C8-A12L | PDCD1LG2 | cna | hetloss | TCGA     |
| TCGA-E2-A1L7 | PDCD1LG2 | cna | hetloss | TCGA     |
| MB-0346      | PDCD1LG2 | cna | gain    | METABRIC |
| MB-2827      | PDCD1LG2 | cna | hetloss | METABRIC |
| MB-6060      | PDCD1LG2 | cna | gain    | METABRIC |
| MB-0420      | PDCD1LG2 | cna | hetloss | METABRIC |
| MTS-T0064    | PDCD1LG2 | cna | amp     | METABRIC |
| PD11327      | PDCD1LG2 | cna | homdel  | BASIS    |
| PD13296      | PDCD1LG2 | cna | gain    | BASIS    |
| PD13297      | PDCD1LG2 | cna | hetloss | BASIS    |
| PD13299      | PDCD1LG2 | cna | amp     | BASIS    |
| PD22355      | PDCD1LG2 | cna | gain    | BASIS    |
| PD23574      | PDCD1LG2 | cna | amp     | BASIS    |
| PD24186      | PDCD1LG2 | cna | gain    | BASIS    |
| PD24337      | PDCD1LG2 | cna | gain    | BASIS    |
| PD3905       | PDCD1LG2 | cna | gain    | BASIS    |
| PD4006       | PDCD1LG2 | cna | gain    | BASIS    |
| PD4107       | PDCD1LG2 | cna | gain    | BASIS    |
| PD4826       | PDCD1LG2 | cna | gain    | BASIS    |
| PD4967       | PDCD1LG2 | cna | hetloss | BASIS    |
| PD5945       | PDCD1LG2 | cna | gain    | BASIS    |
| PD5948       | PDCD1LG2 | cna | hetloss | BASIS    |
| PD6406       | PDCD1LG2 | cna | homdel  | BASIS    |
| PD6413       | PDCD1LG2 | cna | gain    | BASIS    |
| PD6731       | PDCD1LG2 | cna | gain    | BASIS    |
| PD7067       | PDCD1LG2 | cna | amp     | BASIS    |
| PD7215       | PDCD1LG2 | cna | hetloss | BASIS    |
| PD8621       | PDCD1LG2 | cna | gain    | BASIS    |
| PD8980       | PDCD1LG2 | cna | gain    | BASIS    |
| PD9004       | PDCD1LG2 | cna | gain    | BASIS    |
| PD9585       | PDCD1LG2 | cna | hetloss | BASIS    |
| PD9702       | PDCD1LG2 | cna | gain    | BASIS    |
| TCGA-AN-A0XU | PDGFRB   | cna | hetloss | TCGA     |
| TCGA-AO-A0JL | PDGFRB   | cna | hetloss | TCGA     |
| TCGA-BH-A0C0 | PDGFRB   | cna | hetloss | TCGA     |
| TCGA-BH-A18R | PDGFRB   | cna | gain    | TCGA     |
| TCGA-BH-A1FU | PDGFRB   | cna | hetloss | TCGA     |
| TCGA-C8-A12L | PDGFRB   | cna | hetloss | TCGA     |
| TCGA-D8-A27M | PDGFRB   | cna | hetloss | TCGA     |
| TCGA-E2-A1L7 | PDGFRB   | cna | hetloss | TCGA     |
| TCGA-E9-A1NC | PDGFRB   | cna | hetloss | TCGA     |

|                   |        |     |         |            |
|-------------------|--------|-----|---------|------------|
| TCGA-LL-A5YP      | PDGFRB | cna | hetloss | TCGA       |
| MB-0346           | PDGFRB | cna | gain    | METABRIC   |
| MB-5070           | PDGFRB | cna | hetloss | METABRIC   |
| MB-5465           | PDGFRB | cna | hetloss | METABRIC   |
| MB-6098           | PDGFRB | cna | hetloss | METABRIC   |
| MB-7038           | PDGFRB | cna | hetloss | METABRIC   |
| MB-0420           | PDGFRB | cna | hetloss | METABRIC   |
| PD10014           | PDGFRB | cna | hetloss | BASIS      |
| PD13296           | PDGFRB | cna | hetloss | BASIS      |
| PD13297           | PDGFRB | cna | hetloss | BASIS      |
| PD13771           | PDGFRB | cna | gain    | BASIS      |
| PD22355           | PDGFRB | cna | hetloss | BASIS      |
| PD23578           | PDGFRB | cna | hetloss | BASIS      |
| PD24186           | PDGFRB | cna | gain    | BASIS      |
| PD24202           | PDGFRB | cna | hetloss | BASIS      |
| PD24206           | PDGFRB | cna | gain    | BASIS      |
| PD24337           | PDGFRB | cna | hetloss | BASIS      |
| PD3890            | PDGFRB | cna | hetloss | BASIS      |
| PD3905            | PDGFRB | cna | gain    | BASIS      |
| PD4005            | PDGFRB | cna | hetloss | BASIS      |
| PD4826            | PDGFRB | cna | gain    | BASIS      |
| PD5935            | PDGFRB | cna | gain    | BASIS      |
| PD5945            | PDGFRB | cna | gain    | BASIS      |
| PD6406            | PDGFRB | cna | hetloss | BASIS      |
| PD6413            | PDGFRB | cna | hetloss | BASIS      |
| PD7067            | PDGFRB | cna | gain    | BASIS      |
| PD8980            | PDGFRB | cna | hetloss | BASIS      |
| PD9585            | PDGFRB | cna | hetloss | BASIS      |
| TCGA-AN-A0XU      | PHOX2B | cna | hetloss | TCGA       |
| TCGA-AO-A0JL      | PHOX2B | cna | homdel  | TCGA       |
| TCGA-BH-A0AW      | PHOX2B | cna | hetloss | TCGA       |
| TCGA-BH-A0C0      | PHOX2B | cna | gain    | TCGA       |
| TCGA-BH-A1FU      | PHOX2B | cna | homdel  | TCGA       |
| TCGA-C8-A12L      | PHOX2B | cna | hetloss | TCGA       |
| TCGA-D8-A27M      | PHOX2B | cna | gain    | TCGA       |
| TCGA-E9-A1NC      | PHOX2B | cna | hetloss | TCGA       |
| TCGA-LL-A5YP      | PHOX2B | cna | hetloss | TCGA       |
| MB-0346           | PHOX2B | cna | hetloss | METABRIC   |
| MB-2827           | PHOX2B | cna | hetloss | METABRIC   |
| MB-5465           | PHOX2B | cna | hetloss | METABRIC   |
| MB-6060           | PHOX2B | cna | hetloss | METABRIC   |
| MB-6098           | PHOX2B | cna | hetloss | METABRIC   |
| MB-7038           | PHOX2B | cna | gain    | METABRIC   |
| MB-0420           | PHOX2B | cna | hetloss | METABRIC   |
| P-0010758-T01-IM5 | PHOX2B | cna | homdel  | MSK-IMPACT |
| PD11327           | PHOX2B | cna | hetloss | BASIS      |
| PD11742           | PHOX2B | cna | hetloss | BASIS      |

|              |        |     |         |          |
|--------------|--------|-----|---------|----------|
| PD13296      | PHOX2B | cna | hetloss | BASIS    |
| PD13297      | PHOX2B | cna | hetloss | BASIS    |
| PD13299      | PHOX2B | cna | hetloss | BASIS    |
| PD22355      | PHOX2B | cna | hetloss | BASIS    |
| PD24186      | PHOX2B | cna | gain    | BASIS    |
| PD24202      | PHOX2B | cna | hetloss | BASIS    |
| PD24206      | PHOX2B | cna | gain    | BASIS    |
| PD24337      | PHOX2B | cna | hetloss | BASIS    |
| PD4005       | PHOX2B | cna | hetloss | BASIS    |
| PD4006       | PHOX2B | cna | hetloss | BASIS    |
| PD4107       | PHOX2B | cna | hetloss | BASIS    |
| PD5930       | PHOX2B | cna | hetloss | BASIS    |
| PD5945       | PHOX2B | cna | gain    | BASIS    |
| PD6413       | PHOX2B | cna | hetloss | BASIS    |
| PD7067       | PHOX2B | cna | gain    | BASIS    |
| PD8621       | PHOX2B | cna | gain    | BASIS    |
| PD8980       | PHOX2B | cna | hetloss | BASIS    |
| PD9702       | PHOX2B | cna | gain    | BASIS    |
| TCGA-A2-A25B | PICALM | cna | hetloss | TCGA     |
| TCGA-AN-A0XU | PICALM | cna | gain    | TCGA     |
| TCGA-AO-A0JL | PICALM | cna | hetloss | TCGA     |
| TCGA-C8-A12L | PICALM | cna | gain    | TCGA     |
| TCGA-D8-A27M | PICALM | cna | gain    | TCGA     |
| TCGA-EW-A10X | PICALM | cna | homdel  | TCGA     |
| TCGA-LL-A5YP | PICALM | cna | hetloss | TCGA     |
| MB-0346      | PICALM | cna | gain    | METABRIC |
| MB-5070      | PICALM | cna | hetloss | METABRIC |
| MB-5107      | PICALM | cna | amp     | METABRIC |
| MB-6271      | PICALM | cna | hetloss | METABRIC |
| MB-7032      | PICALM | cna | hetloss | METABRIC |
| MTS-T0064    | PICALM | cna | gain    | METABRIC |
| PD10014      | PICALM | cna | gain    | BASIS    |
| PD11327      | PICALM | cna | gain    | BASIS    |
| PD11742      | PICALM | cna | hetloss | BASIS    |
| PD13771      | PICALM | cna | hetloss | BASIS    |
| PD22355      | PICALM | cna | hetloss | BASIS    |
| PD23574      | PICALM | cna | gain    | BASIS    |
| PD23578      | PICALM | cna | hetloss | BASIS    |
| PD24186      | PICALM | cna | gain    | BASIS    |
| PD24206      | PICALM | cna | gain    | BASIS    |
| PD24337      | PICALM | cna | hetloss | BASIS    |
| PD3905       | PICALM | cna | gain    | BASIS    |
| PD4005       | PICALM | cna | gain    | BASIS    |
| PD4006       | PICALM | cna | hetloss | BASIS    |
| PD4826       | PICALM | cna | gain    | BASIS    |
| PD5930       | PICALM | cna | gain    | BASIS    |
| PD5935       | PICALM | cna | gain    | BASIS    |

|              |        |     |         |          |
|--------------|--------|-----|---------|----------|
| PD5945       | PICALM | cna | gain    | BASIS    |
| PD5948       | PICALM | cna | gain    | BASIS    |
| PD6413       | PICALM | cna | hetloss | BASIS    |
| PD7215       | PICALM | cna | gain    | BASIS    |
| PD8980       | PICALM | cna | gain    | BASIS    |
| PD9004       | PICALM | cna | gain    | BASIS    |
| PD9585       | PICALM | cna | hetloss | BASIS    |
| PD9702       | PICALM | cna | gain    | BASIS    |
| TCGA-A2-A25B | PLAG1  | cna | gain    | TCGA     |
| TCGA-AO-A0JL | PLAG1  | cna | amp     | TCGA     |
| TCGA-BH-A0AW | PLAG1  | cna | gain    | TCGA     |
| TCGA-BH-A0C0 | PLAG1  | cna | gain    | TCGA     |
| TCGA-BH-A18R | PLAG1  | cna | homdel  | TCGA     |
| TCGA-BH-A1FU | PLAG1  | cna | gain    | TCGA     |
| TCGA-D8-A27M | PLAG1  | cna | amp     | TCGA     |
| TCGA-E9-A1NC | PLAG1  | cna | amp     | TCGA     |
| TCGA-LL-A5YP | PLAG1  | cna | gain    | TCGA     |
| MB-0346      | PLAG1  | cna | gain    | METABRIC |
| MB-5465      | PLAG1  | cna | hetloss | METABRIC |
| MB-6060      | PLAG1  | cna | amp     | METABRIC |
| MB-6098      | PLAG1  | cna | gain    | METABRIC |
| MB-7038      | PLAG1  | cna | gain    | METABRIC |
| PD10014      | PLAG1  | cna | amp     | BASIS    |
| PD11327      | PLAG1  | cna | hetloss | BASIS    |
| PD13296      | PLAG1  | cna | homdel  | BASIS    |
| PD13299      | PLAG1  | cna | gain    | BASIS    |
| PD23562      | PLAG1  | cna | gain    | BASIS    |
| PD23574      | PLAG1  | cna | gain    | BASIS    |
| PD23578      | PLAG1  | cna | hetloss | BASIS    |
| PD24186      | PLAG1  | cna | gain    | BASIS    |
| PD24202      | PLAG1  | cna | hetloss | BASIS    |
| PD3905       | PLAG1  | cna | gain    | BASIS    |
| PD4005       | PLAG1  | cna | hetloss | BASIS    |
| PD4006       | PLAG1  | cna | gain    | BASIS    |
| PD4107       | PLAG1  | cna | gain    | BASIS    |
| PD4826       | PLAG1  | cna | amp     | BASIS    |
| PD5935       | PLAG1  | cna | gain    | BASIS    |
| PD5945       | PLAG1  | cna | gain    | BASIS    |
| PD7067       | PLAG1  | cna | amp     | BASIS    |
| PD7215       | PLAG1  | cna | amp     | BASIS    |
| PD8621       | PLAG1  | cna | gain    | BASIS    |
| PD8980       | PLAG1  | cna | gain    | BASIS    |
| PD9004       | PLAG1  | cna | gain    | BASIS    |
| PD9585       | PLAG1  | cna | hetloss | BASIS    |
| PD9702       | PLAG1  | cna | gain    | BASIS    |
| TCGA-A2-A25B | PRDM2  | cna | hetloss | TCGA     |
| TCGA-AN-A0XU | PRDM2  | cna | hetloss | TCGA     |

|              |       |     |         |          |
|--------------|-------|-----|---------|----------|
| TCGA-AO-A0JL | PRDM2 | cna | hetloss | TCGA     |
| TCGA-BH-A0AW | PRDM2 | cna | gain    | TCGA     |
| TCGA-BH-A0C0 | PRDM2 | cna | hetloss | TCGA     |
| TCGA-BH-A18R | PRDM2 | cna | homdel  | TCGA     |
| TCGA-BH-A1FU | PRDM2 | cna | gain    | TCGA     |
| TCGA-C8-A12L | PRDM2 | cna | hetloss | TCGA     |
| TCGA-D8-A27M | PRDM2 | cna | gain    | TCGA     |
| TCGA-E2-A1L7 | PRDM2 | cna | hetloss | TCGA     |
| TCGA-E9-A1NC | PRDM2 | cna | hetloss | TCGA     |
| TCGA-LL-A5YP | PRDM2 | cna | hetloss | TCGA     |
| MB-2827      | PRDM2 | cna | hetloss | METABRIC |
| MB-5070      | PRDM2 | cna | hetloss | METABRIC |
| MB-5465      | PRDM2 | cna | hetloss | METABRIC |
| MB-6060      | PRDM2 | cna | hetloss | METABRIC |
| MB-6098      | PRDM2 | cna | hetloss | METABRIC |
| MB-0420      | PRDM2 | cna | hetloss | METABRIC |
| PD10014      | PRDM2 | cna | gain    | BASIS    |
| PD11327      | PRDM2 | cna | gain    | BASIS    |
| PD11742      | PRDM2 | cna | hetloss | BASIS    |
| PD13296      | PRDM2 | cna | hetloss | BASIS    |
| PD13771      | PRDM2 | cna | hetloss | BASIS    |
| PD22355      | PRDM2 | cna | hetloss | BASIS    |
| PD24202      | PRDM2 | cna | hetloss | BASIS    |
| PD24206      | PRDM2 | cna | gain    | BASIS    |
| PD24337      | PRDM2 | cna | hetloss | BASIS    |
| PD3890       | PRDM2 | cna | hetloss | BASIS    |
| PD3905       | PRDM2 | cna | gain    | BASIS    |
| PD4107       | PRDM2 | cna | hetloss | BASIS    |
| PD4826       | PRDM2 | cna | gain    | BASIS    |
| PD5945       | PRDM2 | cna | gain    | BASIS    |
| PD6406       | PRDM2 | cna | hetloss | BASIS    |
| PD7067       | PRDM2 | cna | gain    | BASIS    |
| PD7215       | PRDM2 | cna | gain    | BASIS    |
| PD8980       | PRDM2 | cna | hetloss | BASIS    |
| PD9004       | PRDM2 | cna | hetloss | BASIS    |
| TCGA-A2-A25B | PTEN  | cna | hetloss | TCGA     |
| TCGA-AN-A0XU | PTEN  | cna | homdel  | TCGA     |
| TCGA-AO-A0JL | PTEN  | cna | hetloss | TCGA     |
| TCGA-BH-A0AW | PTEN  | cna | hetloss | TCGA     |
| TCGA-BH-A18R | PTEN  | cna | gain    | TCGA     |
| TCGA-C8-A12L | PTEN  | cna | hetloss | TCGA     |
| TCGA-D8-A27M | PTEN  | cna | hetloss | TCGA     |
| TCGA-E2-A1L7 | PTEN  | cna | hetloss | TCGA     |
| MB-2827      | PTEN  | cna | hetloss | METABRIC |
| MB-5070      | PTEN  | cna | hetloss | METABRIC |
| MB-6060      | PTEN  | cna | hetloss | METABRIC |
| MB-6098      | PTEN  | cna | hetloss | METABRIC |

|                   |      |     |         |            |
|-------------------|------|-----|---------|------------|
| MB-7038           | PTEN | cna | hetloss | METABRIC   |
| MB-7048           | PTEN | cna | homdel  | METABRIC   |
| MTS-T0064         | PTEN | cna | gain    | METABRIC   |
| P-0002237-T01-IM3 | PTEN | cna | homdel  | MSK-IMPACT |
| PD10014           | PTEN | cna | hetloss | BASIS      |
| PD11742           | PTEN | cna | hetloss | BASIS      |
| PD13296           | PTEN | cna | hetloss | BASIS      |
| PD13299           | PTEN | cna | gain    | BASIS      |
| PD23562           | PTEN | cna | homdel  | BASIS      |
| PD23574           | PTEN | cna | gain    | BASIS      |
| PD23578           | PTEN | cna | hetloss | BASIS      |
| PD24202           | PTEN | cna | hetloss | BASIS      |
| PD3890            | PTEN | cna | hetloss | BASIS      |
| PD3905            | PTEN | cna | gain    | BASIS      |
| PD4006            | PTEN | cna | gain    | BASIS      |
| PD4107            | PTEN | cna | gain    | BASIS      |
| PD5935            | PTEN | cna | homdel  | BASIS      |
| PD5945            | PTEN | cna | homdel  | BASIS      |
| PD6406            | PTEN | cna | hetloss | BASIS      |
| PD6413            | PTEN | cna | hetloss | BASIS      |
| PD6731            | PTEN | cna | hetloss | BASIS      |
| PD7215            | PTEN | cna | gain    | BASIS      |
| PD8621            | PTEN | cna | hetloss | BASIS      |
| PD8980            | PTEN | cna | hetloss | BASIS      |
| PD9585            | PTEN | cna | hetloss | BASIS      |
| TCGA-AN-A0XU      | RMI2 | cna | gain    | TCGA       |
| TCGA-AO-A0JL      | RMI2 | cna | amp     | TCGA       |
| TCGA-BH-A0AW      | RMI2 | cna | gain    | TCGA       |
| TCGA-BH-A0C0      | RMI2 | cna | gain    | TCGA       |
| TCGA-C8-A12L      | RMI2 | cna | gain    | TCGA       |
| TCGA-E2-A1L7      | RMI2 | cna | hetloss | TCGA       |
| TCGA-LL-A5YP      | RMI2 | cna | gain    | TCGA       |
| MB-0346           | RMI2 | cna | gain    | METABRIC   |
| MB-6060           | RMI2 | cna | gain    | METABRIC   |
| MB-6098           | RMI2 | cna | hetloss | METABRIC   |
| MB-6271           | RMI2 | cna | gain    | METABRIC   |
| MB-7032           | RMI2 | cna | gain    | METABRIC   |
| MB-7038           | RMI2 | cna | hetloss | METABRIC   |
| MB-0420           | RMI2 | cna | hetloss | METABRIC   |
| PD10014           | RMI2 | cna | hetloss | BASIS      |
| PD11327           | RMI2 | cna | hetloss | BASIS      |
| PD11742           | RMI2 | cna | gain    | BASIS      |
| PD13296           | RMI2 | cna | gain    | BASIS      |
| PD13297           | RMI2 | cna | hetloss | BASIS      |
| PD13299           | RMI2 | cna | gain    | BASIS      |
| PD22355           | RMI2 | cna | hetloss | BASIS      |
| PD23578           | RMI2 | cna | hetloss | BASIS      |



|              |      |     |         |          |
|--------------|------|-----|---------|----------|
| PD24202      | RMI2 | cna | hetloss | BASIS    |
| PD24206      | RMI2 | cna | gain    | BASIS    |
| PD24337      | RMI2 | cna | hetloss | BASIS    |
| PD3905       | RMI2 | cna | gain    | BASIS    |
| PD4005       | RMI2 | cna | gain    | BASIS    |
| PD4107       | RMI2 | cna | gain    | BASIS    |
| PD4826       | RMI2 | cna | gain    | BASIS    |
| PD5935       | RMI2 | cna | gain    | BASIS    |
| PD5945       | RMI2 | cna | gain    | BASIS    |
| PD5948       | RMI2 | cna | gain    | BASIS    |
| PD7067       | RMI2 | cna | gain    | BASIS    |
| PD7215       | RMI2 | cna | amp     | BASIS    |
| PD9004       | RMI2 | cna | gain    | BASIS    |
| PD9585       | RMI2 | cna | hetloss | BASIS    |
| PD9702       | RMI2 | cna | gain    | BASIS    |
| TCGA-A2-A25B | RPGR | cna | gain    | TCGA     |
| TCGA-AN-A0XU | RPGR | cna | hetloss | TCGA     |
| TCGA-AO-A0JL | RPGR | cna | gain    | TCGA     |
| TCGA-BH-A0AW | RPGR | cna | gain    | TCGA     |
| TCGA-E2-A1L7 | RPGR | cna | hetloss | TCGA     |
| TCGA-E9-A1NC | RPGR | cna | hetloss | TCGA     |
| MB-0346      | RPGR | cna | hetloss | METABRIC |
| MB-2827      | RPGR | cna | hetloss | METABRIC |
| MB-5070      | RPGR | cna | hetloss | METABRIC |
| MB-5465      | RPGR | cna | gain    | METABRIC |
| MB-6098      | RPGR | cna | hetloss | METABRIC |
| MB-0420      | RPGR | cna | hetloss | METABRIC |
| MTS-T0064    | RPGR | cna | hetloss | METABRIC |
| PD10014      | RPGR | cna | hetloss | BASIS    |
| PD13296      | RPGR | cna | gain    | BASIS    |
| PD13299      | RPGR | cna | gain    | BASIS    |
| PD13771      | RPGR | cna | gain    | BASIS    |
| PD14442      | RPGR | cna | gain    | BASIS    |
| PD23562      | RPGR | cna | hetloss | BASIS    |
| PD23574      | RPGR | cna | gain    | BASIS    |
| PD23578      | RPGR | cna | hetloss | BASIS    |
| PD3905       | RPGR | cna | gain    | BASIS    |
| PD4005       | RPGR | cna | hetloss | BASIS    |
| PD4006       | RPGR | cna | hetloss | BASIS    |
| PD4107       | RPGR | cna | gain    | BASIS    |
| PD4826       | RPGR | cna | gain    | BASIS    |
| PD4967       | RPGR | cna | gain    | BASIS    |
| PD5935       | RPGR | cna | gain    | BASIS    |
| PD5948       | RPGR | cna | gain    | BASIS    |
| PD6406       | RPGR | cna | gain    | BASIS    |
| PD6413       | RPGR | cna | gain    | BASIS    |
| PD7215       | RPGR | cna | gain    | BASIS    |

|              |       |     |         |          |
|--------------|-------|-----|---------|----------|
| PD8621       | RPGR  | cna | amp     | BASIS    |
| PD8980       | RPGR  | cna | hetloss | BASIS    |
| PD9004       | RPGR  | cna | gain    | BASIS    |
| PD9585       | RPGR  | cna | hetloss | BASIS    |
| PD9702       | RPGR  | cna | hetloss | BASIS    |
| TCGA-AN-A0XU | RPS14 | cna | hetloss | TCGA     |
| TCGA-AO-A0JL | RPS14 | cna | hetloss | TCGA     |
| TCGA-BH-A0C0 | RPS14 | cna | hetloss | TCGA     |
| TCGA-BH-A18R | RPS14 | cna | gain    | TCGA     |
| TCGA-BH-A1FU | RPS14 | cna | hetloss | TCGA     |
| TCGA-C8-A12L | RPS14 | cna | hetloss | TCGA     |
| TCGA-D8-A27M | RPS14 | cna | hetloss | TCGA     |
| TCGA-E2-A1L7 | RPS14 | cna | hetloss | TCGA     |
| TCGA-E9-A1NC | RPS14 | cna | hetloss | TCGA     |
| TCGA-LL-A5YP | RPS14 | cna | hetloss | TCGA     |
| MB-0346      | RPS14 | cna | gain    | METABRIC |
| MB-5070      | RPS14 | cna | hetloss | METABRIC |
| MB-5465      | RPS14 | cna | hetloss | METABRIC |
| MB-6098      | RPS14 | cna | hetloss | METABRIC |
| MB-7038      | RPS14 | cna | hetloss | METABRIC |
| MB-0420      | RPS14 | cna | hetloss | METABRIC |
| PD10014      | RPS14 | cna | hetloss | BASIS    |
| PD13296      | RPS14 | cna | hetloss | BASIS    |
| PD13297      | RPS14 | cna | hetloss | BASIS    |
| PD13771      | RPS14 | cna | gain    | BASIS    |
| PD22355      | RPS14 | cna | hetloss | BASIS    |
| PD23578      | RPS14 | cna | hetloss | BASIS    |
| PD24186      | RPS14 | cna | gain    | BASIS    |
| PD24202      | RPS14 | cna | hetloss | BASIS    |
| PD24206      | RPS14 | cna | gain    | BASIS    |
| PD24337      | RPS14 | cna | hetloss | BASIS    |
| PD3890       | RPS14 | cna | hetloss | BASIS    |
| PD3905       | RPS14 | cna | gain    | BASIS    |
| PD4005       | RPS14 | cna | hetloss | BASIS    |
| PD4826       | RPS14 | cna | gain    | BASIS    |
| PD5935       | RPS14 | cna | gain    | BASIS    |
| PD5945       | RPS14 | cna | gain    | BASIS    |
| PD6406       | RPS14 | cna | hetloss | BASIS    |
| PD6413       | RPS14 | cna | hetloss | BASIS    |
| PD7067       | RPS14 | cna | gain    | BASIS    |
| PD8980       | RPS14 | cna | hetloss | BASIS    |
| PD9585       | RPS14 | cna | hetloss | BASIS    |
| TCGA-A2-A25B | SDHB  | cna | hetloss | TCGA     |
| TCGA-AN-A0XU | SDHB  | cna | hetloss | TCGA     |
| TCGA-AO-A0JL | SDHB  | cna | hetloss | TCGA     |
| TCGA-BH-A0AW | SDHB  | cna | gain    | TCGA     |
| TCGA-BH-A0C0 | SDHB  | cna | hetloss | TCGA     |

|              |       |     |         |          |
|--------------|-------|-----|---------|----------|
| TCGA-BH-A18R | SDHB  | cna | homdel  | TCGA     |
| TCGA-BH-A1FU | SDHB  | cna | gain    | TCGA     |
| TCGA-C8-A12L | SDHB  | cna | hetloss | TCGA     |
| TCGA-D8-A27M | SDHB  | cna | gain    | TCGA     |
| TCGA-E2-A1L7 | SDHB  | cna | hetloss | TCGA     |
| TCGA-E9-A1NC | SDHB  | cna | hetloss | TCGA     |
| TCGA-LL-A5YP | SDHB  | cna | hetloss | TCGA     |
| MB-2827      | SDHB  | cna | hetloss | METABRIC |
| MB-5070      | SDHB  | cna | hetloss | METABRIC |
| MB-5465      | SDHB  | cna | hetloss | METABRIC |
| MB-6060      | SDHB  | cna | hetloss | METABRIC |
| MB-6098      | SDHB  | cna | hetloss | METABRIC |
| MB-6271      | SDHB  | cna | hetloss | METABRIC |
| MB-0420      | SDHB  | cna | hetloss | METABRIC |
| PD10014      | SDHB  | cna | gain    | BASIS    |
| PD11327      | SDHB  | cna | hetloss | BASIS    |
| PD11742      | SDHB  | cna | hetloss | BASIS    |
| PD13296      | SDHB  | cna | hetloss | BASIS    |
| PD13771      | SDHB  | cna | hetloss | BASIS    |
| PD22355      | SDHB  | cna | hetloss | BASIS    |
| PD24202      | SDHB  | cna | hetloss | BASIS    |
| PD24206      | SDHB  | cna | gain    | BASIS    |
| PD24337      | SDHB  | cna | hetloss | BASIS    |
| PD3890       | SDHB  | cna | hetloss | BASIS    |
| PD3905       | SDHB  | cna | gain    | BASIS    |
| PD4826       | SDHB  | cna | gain    | BASIS    |
| PD5945       | SDHB  | cna | gain    | BASIS    |
| PD6406       | SDHB  | cna | hetloss | BASIS    |
| PD7067       | SDHB  | cna | gain    | BASIS    |
| PD7215       | SDHB  | cna | gain    | BASIS    |
| PD9004       | SDHB  | cna | hetloss | BASIS    |
| PD9585       | SDHB  | cna | hetloss | BASIS    |
| TCGA-A2-A25B | SMAD4 | cna | hetloss | TCGA     |
| TCGA-AN-A0XU | SMAD4 | cna | hetloss | TCGA     |
| TCGA-AO-A0JL | SMAD4 | cna | gain    | TCGA     |
| TCGA-BH-A0AW | SMAD4 | cna | hetloss | TCGA     |
| TCGA-BH-A0C0 | SMAD4 | cna | gain    | TCGA     |
| TCGA-C8-A12L | SMAD4 | cna | gain    | TCGA     |
| TCGA-D8-A27M | SMAD4 | cna | hetloss | TCGA     |
| TCGA-E2-A1L7 | SMAD4 | cna | gain    | TCGA     |
| TCGA-LL-A5YP | SMAD4 | cna | hetloss | TCGA     |
| MB-0346      | SMAD4 | cna | hetloss | METABRIC |
| MB-0420      | SMAD4 | cna | homdel  | METABRIC |
| PD10014      | SMAD4 | cna | hetloss | BASIS    |
| PD11327      | SMAD4 | cna | gain    | BASIS    |
| PD11742      | SMAD4 | cna | hetloss | BASIS    |
| PD13296      | SMAD4 | cna | hetloss | BASIS    |

|              |         |     |         |          |
|--------------|---------|-----|---------|----------|
| PD13297      | SMAD4   | cna | gain    | BASIS    |
| PD13299      | SMAD4   | cna | gain    | BASIS    |
| PD22355      | SMAD4   | cna | hetloss | BASIS    |
| PD23574      | SMAD4   | cna | hetloss | BASIS    |
| PD23578      | SMAD4   | cna | hetloss | BASIS    |
| PD24186      | SMAD4   | cna | gain    | BASIS    |
| PD24202      | SMAD4   | cna | hetloss | BASIS    |
| PD24337      | SMAD4   | cna | gain    | BASIS    |
| PD3905       | SMAD4   | cna | gain    | BASIS    |
| PD4005       | SMAD4   | cna | hetloss | BASIS    |
| PD4006       | SMAD4   | cna | gain    | BASIS    |
| PD4107       | SMAD4   | cna | gain    | BASIS    |
| PD4826       | SMAD4   | cna | hetloss | BASIS    |
| PD4967       | SMAD4   | cna | hetloss | BASIS    |
| PD5930       | SMAD4   | cna | gain    | BASIS    |
| PD5945       | SMAD4   | cna | gain    | BASIS    |
| PD5948       | SMAD4   | cna | hetloss | BASIS    |
| PD6406       | SMAD4   | cna | gain    | BASIS    |
| PD8980       | SMAD4   | cna | hetloss | BASIS    |
| PD9004       | SMAD4   | cna | hetloss | BASIS    |
| PD9585       | SMAD4   | cna | hetloss | BASIS    |
| PD9702       | SMAD4   | cna | gain    | BASIS    |
| TCGA-A2-A25B | SMARCD1 | cna | gain    | TCGA     |
| TCGA-AN-A0XU | SMARCD1 | cna | gain    | TCGA     |
| TCGA-AO-A0JL | SMARCD1 | cna | hetloss | TCGA     |
| TCGA-BH-A18R | SMARCD1 | cna | gain    | TCGA     |
| TCGA-BH-A1FU | SMARCD1 | cna | hetloss | TCGA     |
| TCGA-C8-A12L | SMARCD1 | cna | gain    | TCGA     |
| TCGA-D8-A27M | SMARCD1 | cna | hetloss | TCGA     |
| TCGA-E2-A1L7 | SMARCD1 | cna | hetloss | TCGA     |
| TCGA-E9-A1NC | SMARCD1 | cna | hetloss | TCGA     |
| TCGA-LL-A5YP | SMARCD1 | cna | hetloss | TCGA     |
| MB-0346      | SMARCD1 | cna | gain    | METABRIC |
| MB-2827      | SMARCD1 | cna | hetloss | METABRIC |
| MB-5070      | SMARCD1 | cna | hetloss | METABRIC |
| MB-6060      | SMARCD1 | cna | gain    | METABRIC |
| MB-6098      | SMARCD1 | cna | hetloss | METABRIC |
| MB-7038      | SMARCD1 | cna | hetloss | METABRIC |
| MB-7048      | SMARCD1 | cna | hetloss | METABRIC |
| MB-0420      | SMARCD1 | cna | hetloss | METABRIC |
| PD11327      | SMARCD1 | cna | hetloss | BASIS    |
| PD13296      | SMARCD1 | cna | hetloss | BASIS    |
| PD13297      | SMARCD1 | cna | hetloss | BASIS    |
| PD13299      | SMARCD1 | cna | gain    | BASIS    |
| PD23578      | SMARCD1 | cna | hetloss | BASIS    |
| PD24202      | SMARCD1 | cna | hetloss | BASIS    |
| PD24206      | SMARCD1 | cna | gain    | BASIS    |

|              |         |     |         |          |
|--------------|---------|-----|---------|----------|
| PD24337      | SMARCD1 | cna | hetloss | BASIS    |
| PD3890       | SMARCD1 | cna | hetloss | BASIS    |
| PD3905       | SMARCD1 | cna | gain    | BASIS    |
| PD4107       | SMARCD1 | cna | hetloss | BASIS    |
| PD4826       | SMARCD1 | cna | gain    | BASIS    |
| PD5945       | SMARCD1 | cna | gain    | BASIS    |
| PD6413       | SMARCD1 | cna | hetloss | BASIS    |
| PD6731       | SMARCD1 | cna | hetloss | BASIS    |
| PD7067       | SMARCD1 | cna | gain    | BASIS    |
| PD8621       | SMARCD1 | cna | gain    | BASIS    |
| PD9585       | SMARCD1 | cna | hetloss | BASIS    |
| PD9702       | SMARCD1 | cna | gain    | BASIS    |
| TCGA-A2-A25B | SMO     | cna | gain    | TCGA     |
| TCGA-AO-A0JL | SMO     | cna | gain    | TCGA     |
| TCGA-BH-A0AW | SMO     | cna | gain    | TCGA     |
| TCGA-C8-A12L | SMO     | cna | hetloss | TCGA     |
| TCGA-D8-A27M | SMO     | cna | gain    | TCGA     |
| TCGA-E2-A1L7 | SMO     | cna | hetloss | TCGA     |
| TCGA-E9-A1NC | SMO     | cna | gain    | TCGA     |
| TCGA-LL-A5YP | SMO     | cna | gain    | TCGA     |
| MB-0346      | SMO     | cna | hetloss | METABRIC |
| MB-2827      | SMO     | cna | amp     | METABRIC |
| MB-7038      | SMO     | cna | gain    | METABRIC |
| MB-7048      | SMO     | cna | gain    | METABRIC |
| MTS-T0064    | SMO     | cna | hetloss | METABRIC |
| PD13296      | SMO     | cna | hetloss | BASIS    |
| PD13297      | SMO     | cna | gain    | BASIS    |
| PD13299      | SMO     | cna | gain    | BASIS    |
| PD22355      | SMO     | cna | hetloss | BASIS    |
| PD23574      | SMO     | cna | gain    | BASIS    |
| PD23578      | SMO     | cna | gain    | BASIS    |
| PD24186      | SMO     | cna | amp     | BASIS    |
| PD3890       | SMO     | cna | hetloss | BASIS    |
| PD3905       | SMO     | cna | gain    | BASIS    |
| PD4006       | SMO     | cna | gain    | BASIS    |
| PD4107       | SMO     | cna | gain    | BASIS    |
| PD4826       | SMO     | cna | gain    | BASIS    |
| PD4967       | SMO     | cna | hetloss | BASIS    |
| PD5930       | SMO     | cna | gain    | BASIS    |
| PD5935       | SMO     | cna | gain    | BASIS    |
| PD5945       | SMO     | cna | amp     | BASIS    |
| PD5948       | SMO     | cna | gain    | BASIS    |
| PD6406       | SMO     | cna | gain    | BASIS    |
| PD7067       | SMO     | cna | gain    | BASIS    |
| PD7215       | SMO     | cna | gain    | BASIS    |
| PD8621       | SMO     | cna | gain    | BASIS    |
| PD9004       | SMO     | cna | gain    | BASIS    |

|              |       |     |         |          |
|--------------|-------|-----|---------|----------|
| PD9585       | SMO   | cna | gain    | BASIS    |
| PD9702       | SMO   | cna | amp     | BASIS    |
| TCGA-AN-A0XU | SOCS1 | cna | gain    | TCGA     |
| TCGA-AO-A0JL | SOCS1 | cna | amp     | TCGA     |
| TCGA-BH-A0AW | SOCS1 | cna | gain    | TCGA     |
| TCGA-BH-A0C0 | SOCS1 | cna | gain    | TCGA     |
| TCGA-C8-A12L | SOCS1 | cna | gain    | TCGA     |
| TCGA-E2-A1L7 | SOCS1 | cna | hetloss | TCGA     |
| TCGA-LL-A5YP | SOCS1 | cna | gain    | TCGA     |
| MB-0346      | SOCS1 | cna | gain    | METABRIC |
| MB-6060      | SOCS1 | cna | gain    | METABRIC |
| MB-6098      | SOCS1 | cna | hetloss | METABRIC |
| MB-6271      | SOCS1 | cna | gain    | METABRIC |
| MB-7032      | SOCS1 | cna | gain    | METABRIC |
| MB-7038      | SOCS1 | cna | hetloss | METABRIC |
| MB-0420      | SOCS1 | cna | hetloss | METABRIC |
| PD10014      | SOCS1 | cna | hetloss | BASIS    |
| PD11327      | SOCS1 | cna | hetloss | BASIS    |
| PD11742      | SOCS1 | cna | gain    | BASIS    |
| PD13296      | SOCS1 | cna | gain    | BASIS    |
| PD13297      | SOCS1 | cna | hetloss | BASIS    |
| PD13299      | SOCS1 | cna | gain    | BASIS    |
| PD22355      | SOCS1 | cna | hetloss | BASIS    |
| PD23578      | SOCS1 | cna | hetloss | BASIS    |
| PD24202      | SOCS1 | cna | hetloss | BASIS    |
| PD24206      | SOCS1 | cna | gain    | BASIS    |
| PD24337      | SOCS1 | cna | hetloss | BASIS    |
| PD3905       | SOCS1 | cna | gain    | BASIS    |
| PD4005       | SOCS1 | cna | gain    | BASIS    |
| PD4107       | SOCS1 | cna | gain    | BASIS    |
| PD4826       | SOCS1 | cna | gain    | BASIS    |
| PD5935       | SOCS1 | cna | gain    | BASIS    |
| PD5945       | SOCS1 | cna | gain    | BASIS    |
| PD5948       | SOCS1 | cna | gain    | BASIS    |
| PD7067       | SOCS1 | cna | gain    | BASIS    |
| PD7215       | SOCS1 | cna | amp     | BASIS    |
| PD9004       | SOCS1 | cna | gain    | BASIS    |
| PD9585       | SOCS1 | cna | hetloss | BASIS    |
| PD9702       | SOCS1 | cna | gain    | BASIS    |
| TCGA-A2-A25B | SSX1  | cna | gain    | TCGA     |
| TCGA-AN-A0XU | SSX1  | cna | hetloss | TCGA     |
| TCGA-AO-A0JL | SSX1  | cna | gain    | TCGA     |
| TCGA-BH-A0AW | SSX1  | cna | gain    | TCGA     |
| TCGA-E2-A1L7 | SSX1  | cna | hetloss | TCGA     |
| TCGA-E9-A1NC | SSX1  | cna | hetloss | TCGA     |
| MB-0346      | SSX1  | cna | hetloss | METABRIC |
| MB-2827      | SSX1  | cna | hetloss | METABRIC |

|              |      |     |         |          |
|--------------|------|-----|---------|----------|
| MB-5465      | SSX1 | cna | gain    | METABRIC |
| MB-6098      | SSX1 | cna | hetloss | METABRIC |
| MB-0420      | SSX1 | cna | hetloss | METABRIC |
| PD10014      | SSX1 | cna | hetloss | BASIS    |
| PD11327      | SSX1 | cna | homdel  | BASIS    |
| PD13296      | SSX1 | cna | gain    | BASIS    |
| PD13297      | SSX1 | cna | gain    | BASIS    |
| PD13299      | SSX1 | cna | amp     | BASIS    |
| PD13771      | SSX1 | cna | gain    | BASIS    |
| PD14442      | SSX1 | cna | gain    | BASIS    |
| PD23562      | SSX1 | cna | hetloss | BASIS    |
| PD23574      | SSX1 | cna | gain    | BASIS    |
| PD24206      | SSX1 | cna | hetloss | BASIS    |
| PD3905       | SSX1 | cna | gain    | BASIS    |
| PD4005       | SSX1 | cna | hetloss | BASIS    |
| PD4006       | SSX1 | cna | hetloss | BASIS    |
| PD4107       | SSX1 | cna | gain    | BASIS    |
| PD4826       | SSX1 | cna | gain    | BASIS    |
| PD4967       | SSX1 | cna | gain    | BASIS    |
| PD5935       | SSX1 | cna | gain    | BASIS    |
| PD5945       | SSX1 | cna | gain    | BASIS    |
| PD5948       | SSX1 | cna | gain    | BASIS    |
| PD6406       | SSX1 | cna | gain    | BASIS    |
| PD6413       | SSX1 | cna | gain    | BASIS    |
| PD7067       | SSX1 | cna | amp     | BASIS    |
| PD7215       | SSX1 | cna | amp     | BASIS    |
| PD8621       | SSX1 | cna | amp     | BASIS    |
| PD8980       | SSX1 | cna | hetloss | BASIS    |
| PD9004       | SSX1 | cna | gain    | BASIS    |
| TCGA-A2-A25B | SSX2 | cna | gain    | TCGA     |
| TCGA-AN-A0XU | SSX2 | cna | hetloss | TCGA     |
| TCGA-AO-A0JL | SSX2 | cna | gain    | TCGA     |
| TCGA-BH-A0AW | SSX2 | cna | gain    | TCGA     |
| TCGA-E2-A1L7 | SSX2 | cna | hetloss | TCGA     |
| TCGA-E9-A1NC | SSX2 | cna | hetloss | TCGA     |
| MB-0346      | SSX2 | cna | gain    | METABRIC |
| MB-2827      | SSX2 | cna | hetloss | METABRIC |
| MB-5465      | SSX2 | cna | gain    | METABRIC |
| MB-6098      | SSX2 | cna | hetloss | METABRIC |
| MB-0420      | SSX2 | cna | hetloss | METABRIC |
| PD10014      | SSX2 | cna | hetloss | BASIS    |
| PD11327      | SSX2 | cna | homdel  | BASIS    |
| PD13296      | SSX2 | cna | gain    | BASIS    |
| PD13297      | SSX2 | cna | gain    | BASIS    |
| PD13299      | SSX2 | cna | gain    | BASIS    |
| PD13771      | SSX2 | cna | gain    | BASIS    |
| PD14442      | SSX2 | cna | gain    | BASIS    |

|              |      |     |         |          |
|--------------|------|-----|---------|----------|
| PD23562      | SSX2 | cna | hetloss | BASIS    |
| PD23574      | SSX2 | cna | gain    | BASIS    |
| PD24206      | SSX2 | cna | amp     | BASIS    |
| PD3905       | SSX2 | cna | gain    | BASIS    |
| PD4005       | SSX2 | cna | hetloss | BASIS    |
| PD4006       | SSX2 | cna | hetloss | BASIS    |
| PD4107       | SSX2 | cna | gain    | BASIS    |
| PD4826       | SSX2 | cna | gain    | BASIS    |
| PD4967       | SSX2 | cna | gain    | BASIS    |
| PD5935       | SSX2 | cna | gain    | BASIS    |
| PD5945       | SSX2 | cna | gain    | BASIS    |
| PD5948       | SSX2 | cna | gain    | BASIS    |
| PD6406       | SSX2 | cna | gain    | BASIS    |
| PD6413       | SSX2 | cna | gain    | BASIS    |
| PD7067       | SSX2 | cna | gain    | BASIS    |
| PD7215       | SSX2 | cna | amp     | BASIS    |
| PD8621       | SSX2 | cna | amp     | BASIS    |
| PD8980       | SSX2 | cna | hetloss | BASIS    |
| PD9004       | SSX2 | cna | gain    | BASIS    |
| TCGA-A2-A25B | SSX4 | cna | gain    | TCGA     |
| TCGA-AN-A0XU | SSX4 | cna | hetloss | TCGA     |
| TCGA-AO-A0JL | SSX4 | cna | gain    | TCGA     |
| TCGA-BH-A0AW | SSX4 | cna | gain    | TCGA     |
| TCGA-E2-A1L7 | SSX4 | cna | hetloss | TCGA     |
| TCGA-E9-A1NC | SSX4 | cna | hetloss | TCGA     |
| MB-0346      | SSX4 | cna | hetloss | METABRIC |
| MB-2827      | SSX4 | cna | hetloss | METABRIC |
| MB-5465      | SSX4 | cna | gain    | METABRIC |
| MB-6098      | SSX4 | cna | hetloss | METABRIC |
| MB-0420      | SSX4 | cna | hetloss | METABRIC |
| PD10014      | SSX4 | cna | hetloss | BASIS    |
| PD11327      | SSX4 | cna | homdel  | BASIS    |
| PD13296      | SSX4 | cna | gain    | BASIS    |
| PD13297      | SSX4 | cna | gain    | BASIS    |
| PD13299      | SSX4 | cna | amp     | BASIS    |
| PD13771      | SSX4 | cna | gain    | BASIS    |
| PD14442      | SSX4 | cna | gain    | BASIS    |
| PD23562      | SSX4 | cna | hetloss | BASIS    |
| PD23574      | SSX4 | cna | gain    | BASIS    |
| PD24206      | SSX4 | cna | hetloss | BASIS    |
| PD3905       | SSX4 | cna | gain    | BASIS    |
| PD4005       | SSX4 | cna | hetloss | BASIS    |
| PD4006       | SSX4 | cna | hetloss | BASIS    |
| PD4107       | SSX4 | cna | gain    | BASIS    |
| PD4826       | SSX4 | cna | gain    | BASIS    |
| PD4967       | SSX4 | cna | gain    | BASIS    |
| PD5935       | SSX4 | cna | gain    | BASIS    |



|              |       |     |         |          |
|--------------|-------|-----|---------|----------|
| PD5945       | SSX4  | cna | gain    | BASIS    |
| PD5948       | SSX4  | cna | gain    | BASIS    |
| PD6406       | SSX4  | cna | gain    | BASIS    |
| PD6413       | SSX4  | cna | gain    | BASIS    |
| PD7067       | SSX4  | cna | amp     | BASIS    |
| PD7215       | SSX4  | cna | amp     | BASIS    |
| PD8621       | SSX4  | cna | amp     | BASIS    |
| PD8980       | SSX4  | cna | hetloss | BASIS    |
| PD9004       | SSX4  | cna | gain    | BASIS    |
| TCGA-A2-A25B | STAG2 | cna | hetloss | TCGA     |
| TCGA-AN-A0XU | STAG2 | cna | hetloss | TCGA     |
| TCGA-BH-A0AW | STAG2 | cna | gain    | TCGA     |
| TCGA-C8-A12L | STAG2 | cna | gain    | TCGA     |
| TCGA-E2-A1L7 | STAG2 | cna | hetloss | TCGA     |
| TCGA-E9-A1NC | STAG2 | cna | hetloss | TCGA     |
| MB-0346      | STAG2 | cna | hetloss | METABRIC |
| MB-2827      | STAG2 | cna | hetloss | METABRIC |
| MB-5465      | STAG2 | cna | hetloss | METABRIC |
| MB-6098      | STAG2 | cna | hetloss | METABRIC |
| MB-7038      | STAG2 | cna | gain    | METABRIC |
| MB-7048      | STAG2 | cna | hetloss | METABRIC |
| PD10014      | STAG2 | cna | hetloss | BASIS    |
| PD11327      | STAG2 | cna | hetloss | BASIS    |
| PD13296      | STAG2 | cna | hetloss | BASIS    |
| PD13299      | STAG2 | cna | amp     | BASIS    |
| PD13771      | STAG2 | cna | gain    | BASIS    |
| PD14442      | STAG2 | cna | gain    | BASIS    |
| PD23562      | STAG2 | cna | hetloss | BASIS    |
| PD23574      | STAG2 | cna | gain    | BASIS    |
| PD23578      | STAG2 | cna | hetloss | BASIS    |
| PD24202      | STAG2 | cna | hetloss | BASIS    |
| PD24206      | STAG2 | cna | gain    | BASIS    |
| PD3905       | STAG2 | cna | gain    | BASIS    |
| PD4107       | STAG2 | cna | gain    | BASIS    |
| PD4826       | STAG2 | cna | gain    | BASIS    |
| PD4967       | STAG2 | cna | gain    | BASIS    |
| PD5930       | STAG2 | cna | gain    | BASIS    |
| PD5935       | STAG2 | cna | gain    | BASIS    |
| PD5945       | STAG2 | cna | gain    | BASIS    |
| PD5948       | STAG2 | cna | gain    | BASIS    |
| PD6406       | STAG2 | cna | gain    | BASIS    |
| PD6413       | STAG2 | cna | gain    | BASIS    |
| PD7215       | STAG2 | cna | gain    | BASIS    |
| PD8621       | STAG2 | cna | amp     | BASIS    |
| PD8980       | STAG2 | cna | hetloss | BASIS    |
| PD9004       | STAG2 | cna | gain    | BASIS    |
| TCGA-AN-A0XU | STK11 | cna | hetloss | TCGA     |

|                   |       |     |         |            |
|-------------------|-------|-----|---------|------------|
| TCGA-AO-A0JL      | STK11 | cna | gain    | TCGA       |
| TCGA-BH-A0C0      | STK11 | cna | gain    | TCGA       |
| TCGA-BH-A1FU      | STK11 | cna | hetloss | TCGA       |
| TCGA-C8-A12L      | STK11 | cna | hetloss | TCGA       |
| TCGA-D8-A27M      | STK11 | cna | hetloss | TCGA       |
| TCGA-E9-A1NC      | STK11 | cna | hetloss | TCGA       |
| TCGA-EW-A10X      | STK11 | cna | hetloss | TCGA       |
| TCGA-LL-A5YP      | STK11 | cna | hetloss | TCGA       |
| MB-0346           | STK11 | cna | gain    | METABRIC   |
| MB-2827           | STK11 | cna | hetloss | METABRIC   |
| MB-5070           | STK11 | cna | hetloss | METABRIC   |
| MB-6098           | STK11 | cna | hetloss | METABRIC   |
| MB-7038           | STK11 | cna | hetloss | METABRIC   |
| MB-0420           | STK11 | cna | hetloss | METABRIC   |
| P-0009557-T01-IM5 | STK11 | cna | homdel  | MSK-IMPACT |
| PD11327           | STK11 | cna | amp     | BASIS      |
| PD11742           | STK11 | cna | hetloss | BASIS      |
| PD14442           | STK11 | cna | hetloss | BASIS      |
| PD22355           | STK11 | cna | hetloss | BASIS      |
| PD23574           | STK11 | cna | gain    | BASIS      |
| PD23578           | STK11 | cna | hetloss | BASIS      |
| PD24206           | STK11 | cna | hetloss | BASIS      |
| PD3890            | STK11 | cna | hetloss | BASIS      |
| PD3905            | STK11 | cna | gain    | BASIS      |
| PD4005            | STK11 | cna | gain    | BASIS      |
| PD4006            | STK11 | cna | gain    | BASIS      |
| PD4826            | STK11 | cna | hetloss | BASIS      |
| PD4967            | STK11 | cna | hetloss | BASIS      |
| PD5930            | STK11 | cna | gain    | BASIS      |
| PD5945            | STK11 | cna | gain    | BASIS      |
| PD5948            | STK11 | cna | gain    | BASIS      |
| PD7067            | STK11 | cna | gain    | BASIS      |
| PD8621            | STK11 | cna | gain    | BASIS      |
| PD8980            | STK11 | cna | gain    | BASIS      |
| PD9004            | STK11 | cna | hetloss | BASIS      |
| PD9585            | STK11 | cna | hetloss | BASIS      |
| TCGA-A2-A25B      | TFE3  | cna | gain    | TCGA       |
| TCGA-AN-A0XU      | TFE3  | cna | hetloss | TCGA       |
| TCGA-AO-A0JL      | TFE3  | cna | gain    | TCGA       |
| TCGA-BH-A0AW      | TFE3  | cna | gain    | TCGA       |
| TCGA-E2-A1L7      | TFE3  | cna | hetloss | TCGA       |
| TCGA-E9-A1NC      | TFE3  | cna | hetloss | TCGA       |
| MB-0346           | TFE3  | cna | gain    | METABRIC   |
| MB-2827           | TFE3  | cna | hetloss | METABRIC   |
| MB-5465           | TFE3  | cna | gain    | METABRIC   |
| MB-6098           | TFE3  | cna | hetloss | METABRIC   |
| MB-0420           | TFE3  | cna | hetloss | METABRIC   |

|              |           |     |         |          |
|--------------|-----------|-----|---------|----------|
| PD10014      | TFE3      | cna | hetloss | BASIS    |
| PD11327      | TFE3      | cna | homdel  | BASIS    |
| PD13296      | TFE3      | cna | gain    | BASIS    |
| PD13297      | TFE3      | cna | gain    | BASIS    |
| PD13299      | TFE3      | cna | amp     | BASIS    |
| PD13771      | TFE3      | cna | gain    | BASIS    |
| PD14442      | TFE3      | cna | gain    | BASIS    |
| PD23562      | TFE3      | cna | hetloss | BASIS    |
| PD23574      | TFE3      | cna | gain    | BASIS    |
| PD24206      | TFE3      | cna | hetloss | BASIS    |
| PD3905       | TFE3      | cna | gain    | BASIS    |
| PD4005       | TFE3      | cna | hetloss | BASIS    |
| PD4006       | TFE3      | cna | hetloss | BASIS    |
| PD4107       | TFE3      | cna | gain    | BASIS    |
| PD4826       | TFE3      | cna | gain    | BASIS    |
| PD4967       | TFE3      | cna | gain    | BASIS    |
| PD5935       | TFE3      | cna | gain    | BASIS    |
| PD5945       | TFE3      | cna | gain    | BASIS    |
| PD5948       | TFE3      | cna | gain    | BASIS    |
| PD6406       | TFE3      | cna | gain    | BASIS    |
| PD6413       | TFE3      | cna | gain    | BASIS    |
| PD7067       | TFE3      | cna | gain    | BASIS    |
| PD7215       | TFE3      | cna | amp     | BASIS    |
| PD8621       | TFE3      | cna | amp     | BASIS    |
| PD8980       | TFE3      | cna | hetloss | BASIS    |
| PD9004       | TFE3      | cna | gain    | BASIS    |
| TCGA-A2-A25B | TNFRSF11A | cna | hetloss | TCGA     |
| TCGA-AO-A0JL | TNFRSF11A | cna | gain    | TCGA     |
| TCGA-BH-A0AW | TNFRSF11A | cna | hetloss | TCGA     |
| TCGA-BH-A0C0 | TNFRSF11A | cna | gain    | TCGA     |
| TCGA-C8-A12L | TNFRSF11A | cna | gain    | TCGA     |
| TCGA-D8-A27M | TNFRSF11A | cna | hetloss | TCGA     |
| TCGA-E2-A1L7 | TNFRSF11A | cna | gain    | TCGA     |
| TCGA-LL-A5YP | TNFRSF11A | cna | hetloss | TCGA     |
| MB-0346      | TNFRSF11A | cna | hetloss | METABRIC |
| MB-7048      | TNFRSF11A | cna | hetloss | METABRIC |
| MB-0420      | TNFRSF11A | cna | hetloss | METABRIC |
| MTS-T0064    | TNFRSF11A | cna | hetloss | METABRIC |
| PD10014      | TNFRSF11A | cna | hetloss | BASIS    |
| PD11742      | TNFRSF11A | cna | hetloss | BASIS    |
| PD13296      | TNFRSF11A | cna | hetloss | BASIS    |
| PD13297      | TNFRSF11A | cna | gain    | BASIS    |
| PD13299      | TNFRSF11A | cna | gain    | BASIS    |
| PD22355      | TNFRSF11A | cna | hetloss | BASIS    |
| PD23574      | TNFRSF11A | cna | hetloss | BASIS    |
| PD23578      | TNFRSF11A | cna | hetloss | BASIS    |
| PD24186      | TNFRSF11A | cna | gain    | BASIS    |

|              |           |     |         |          |
|--------------|-----------|-----|---------|----------|
| PD24202      | TNFRSF11A | cna | hetloss | BASIS    |
| PD24337      | TNFRSF11A | cna | gain    | BASIS    |
| PD3905       | TNFRSF11A | cna | gain    | BASIS    |
| PD4006       | TNFRSF11A | cna | gain    | BASIS    |
| PD4107       | TNFRSF11A | cna | gain    | BASIS    |
| PD4826       | TNFRSF11A | cna | hetloss | BASIS    |
| PD4967       | TNFRSF11A | cna | hetloss | BASIS    |
| PD5930       | TNFRSF11A | cna | hetloss | BASIS    |
| PD5945       | TNFRSF11A | cna | gain    | BASIS    |
| PD5948       | TNFRSF11A | cna | gain    | BASIS    |
| PD6406       | TNFRSF11A | cna | gain    | BASIS    |
| PD7067       | TNFRSF11A | cna | gain    | BASIS    |
| PD8980       | TNFRSF11A | cna | hetloss | BASIS    |
| PD9004       | TNFRSF11A | cna | hetloss | BASIS    |
| PD9585       | TNFRSF11A | cna | hetloss | BASIS    |
| PD9702       | TNFRSF11A | cna | gain    | BASIS    |
| TCGA-A2-A25B | TSHR      | cna | hetloss | TCGA     |
| TCGA-AO-A0JL | TSHR      | cna | hetloss | TCGA     |
| TCGA-BH-A0AW | TSHR      | cna | hetloss | TCGA     |
| TCGA-BH-A1FU | TSHR      | cna | gain    | TCGA     |
| TCGA-C8-A12L | TSHR      | cna | hetloss | TCGA     |
| TCGA-D8-A27M | TSHR      | cna | hetloss | TCGA     |
| TCGA-E2-A1L7 | TSHR      | cna | hetloss | TCGA     |
| TCGA-LL-A5YP | TSHR      | cna | hetloss | TCGA     |
| MB-0346      | TSHR      | cna | gain    | METABRIC |
| MB-2827      | TSHR      | cna | hetloss | METABRIC |
| MB-5070      | TSHR      | cna | hetloss | METABRIC |
| MB-5107      | TSHR      | cna | hetloss | METABRIC |
| MTS-T0064    | TSHR      | cna | amp     | METABRIC |
| PD10014      | TSHR      | cna | hetloss | BASIS    |
| PD11327      | TSHR      | cna | gain    | BASIS    |
| PD11742      | TSHR      | cna | hetloss | BASIS    |
| PD13296      | TSHR      | cna | gain    | BASIS    |
| PD13297      | TSHR      | cna | hetloss | BASIS    |
| PD13771      | TSHR      | cna | hetloss | BASIS    |
| PD23574      | TSHR      | cna | gain    | BASIS    |
| PD23578      | TSHR      | cna | hetloss | BASIS    |
| PD24202      | TSHR      | cna | hetloss | BASIS    |
| PD24206      | TSHR      | cna | gain    | BASIS    |
| PD24337      | TSHR      | cna | hetloss | BASIS    |
| PD3890       | TSHR      | cna | hetloss | BASIS    |
| PD3905       | TSHR      | cna | gain    | BASIS    |
| PD4005       | TSHR      | cna | hetloss | BASIS    |
| PD4107       | TSHR      | cna | hetloss | BASIS    |
| PD4826       | TSHR      | cna | gain    | BASIS    |
| PD5945       | TSHR      | cna | gain    | BASIS    |
| PD6406       | TSHR      | cna | hetloss | BASIS    |

|              |       |     |         |          |
|--------------|-------|-----|---------|----------|
| PD6413       | TSHR  | cna | hetloss | BASIS    |
| PD7067       | TSHR  | cna | gain    | BASIS    |
| PD7215       | TSHR  | cna | hetloss | BASIS    |
| PD8621       | TSHR  | cna | hetloss | BASIS    |
| PD8980       | TSHR  | cna | hetloss | BASIS    |
| PD9702       | TSHR  | cna | gain    | BASIS    |
| TCGA-A2-A25B | U2AF1 | cna | hetloss | TCGA     |
| TCGA-BH-A0AW | U2AF1 | cna | gain    | TCGA     |
| TCGA-BH-A0C0 | U2AF1 | cna | hetloss | TCGA     |
| TCGA-BH-A1FU | U2AF1 | cna | gain    | TCGA     |
| TCGA-C8-A12L | U2AF1 | cna | hetloss | TCGA     |
| TCGA-D8-A27M | U2AF1 | cna | hetloss | TCGA     |
| TCGA-LL-A5YP | U2AF1 | cna | gain    | TCGA     |
| MB-2827      | U2AF1 | cna | amp     | METABRIC |
| MB-6098      | U2AF1 | cna | hetloss | METABRIC |
| MB-7038      | U2AF1 | cna | gain    | METABRIC |
| MB-7048      | U2AF1 | cna | hetloss | METABRIC |
| PD10014      | U2AF1 | cna | hetloss | BASIS    |
| PD11327      | U2AF1 | cna | gain    | BASIS    |
| PD13296      | U2AF1 | cna | gain    | BASIS    |
| PD13297      | U2AF1 | cna | hetloss | BASIS    |
| PD13299      | U2AF1 | cna | gain    | BASIS    |
| PD13771      | U2AF1 | cna | gain    | BASIS    |
| PD23562      | U2AF1 | cna | gain    | BASIS    |
| PD23574      | U2AF1 | cna | gain    | BASIS    |
| PD23578      | U2AF1 | cna | gain    | BASIS    |
| PD24186      | U2AF1 | cna | gain    | BASIS    |
| PD24206      | U2AF1 | cna | gain    | BASIS    |
| PD3890       | U2AF1 | cna | hetloss | BASIS    |
| PD3905       | U2AF1 | cna | gain    | BASIS    |
| PD4006       | U2AF1 | cna | amp     | BASIS    |
| PD4107       | U2AF1 | cna | gain    | BASIS    |
| PD4826       | U2AF1 | cna | gain    | BASIS    |
| PD5930       | U2AF1 | cna | gain    | BASIS    |
| PD5945       | U2AF1 | cna | gain    | BASIS    |
| PD5948       | U2AF1 | cna | gain    | BASIS    |
| PD6731       | U2AF1 | cna | gain    | BASIS    |
| PD7067       | U2AF1 | cna | gain    | BASIS    |
| PD7215       | U2AF1 | cna | gain    | BASIS    |
| PD8621       | U2AF1 | cna | gain    | BASIS    |
| PD8980       | U2AF1 | cna | hetloss | BASIS    |
| PD9004       | U2AF1 | cna | gain    | BASIS    |
| PD9702       | U2AF1 | cna | gain    | BASIS    |
| TCGA-A2-A25B | WAS   | cna | gain    | TCGA     |
| TCGA-AN-A0XU | WAS   | cna | hetloss | TCGA     |
| TCGA-AO-A0JL | WAS   | cna | gain    | TCGA     |
| TCGA-BH-A0AW | WAS   | cna | gain    | TCGA     |

|              |      |     |         |          |
|--------------|------|-----|---------|----------|
| TCGA-E2-A1L7 | WAS  | cna | hetloss | TCGA     |
| TCGA-E9-A1NC | WAS  | cna | hetloss | TCGA     |
| MB-0346      | WAS  | cna | gain    | METABRIC |
| MB-2827      | WAS  | cna | hetloss | METABRIC |
| MB-5465      | WAS  | cna | gain    | METABRIC |
| MB-6098      | WAS  | cna | hetloss | METABRIC |
| MB-0420      | WAS  | cna | hetloss | METABRIC |
| PD10014      | WAS  | cna | hetloss | BASIS    |
| PD11327      | WAS  | cna | homdel  | BASIS    |
| PD13296      | WAS  | cna | gain    | BASIS    |
| PD13297      | WAS  | cna | gain    | BASIS    |
| PD13299      | WAS  | cna | amp     | BASIS    |
| PD13771      | WAS  | cna | gain    | BASIS    |
| PD14442      | WAS  | cna | gain    | BASIS    |
| PD23562      | WAS  | cna | hetloss | BASIS    |
| PD23574      | WAS  | cna | gain    | BASIS    |
| PD24206      | WAS  | cna | hetloss | BASIS    |
| PD3905       | WAS  | cna | gain    | BASIS    |
| PD4005       | WAS  | cna | hetloss | BASIS    |
| PD4006       | WAS  | cna | hetloss | BASIS    |
| PD4107       | WAS  | cna | gain    | BASIS    |
| PD4826       | WAS  | cna | gain    | BASIS    |
| PD4967       | WAS  | cna | gain    | BASIS    |
| PD5935       | WAS  | cna | gain    | BASIS    |
| PD5945       | WAS  | cna | gain    | BASIS    |
| PD5948       | WAS  | cna | gain    | BASIS    |
| PD6406       | WAS  | cna | gain    | BASIS    |
| PD6413       | WAS  | cna | gain    | BASIS    |
| PD7067       | WAS  | cna | gain    | BASIS    |
| PD7215       | WAS  | cna | amp     | BASIS    |
| PD8621       | WAS  | cna | amp     | BASIS    |
| PD8980       | WAS  | cna | hetloss | BASIS    |
| PD9004       | WAS  | cna | gain    | BASIS    |
| TCGA-A2-A25B | XIAP | cna | hetloss | TCGA     |
| TCGA-AN-A0XU | XIAP | cna | hetloss | TCGA     |
| TCGA-BH-A0AW | XIAP | cna | gain    | TCGA     |
| TCGA-C8-A12L | XIAP | cna | gain    | TCGA     |
| TCGA-E2-A1L7 | XIAP | cna | hetloss | TCGA     |
| TCGA-E9-A1NC | XIAP | cna | hetloss | TCGA     |
| MB-0346      | XIAP | cna | hetloss | METABRIC |
| MB-2827      | XIAP | cna | hetloss | METABRIC |
| MB-5465      | XIAP | cna | hetloss | METABRIC |
| MB-6098      | XIAP | cna | hetloss | METABRIC |
| MB-7038      | XIAP | cna | gain    | METABRIC |
| MB-7048      | XIAP | cna | hetloss | METABRIC |
| PD10014      | XIAP | cna | hetloss | BASIS    |
| PD11327      | XIAP | cna | homdel  | BASIS    |

|              |        |     |         |          |
|--------------|--------|-----|---------|----------|
| PD13296      | XIAP   | cna | hetloss | BASIS    |
| PD13299      | XIAP   | cna | amp     | BASIS    |
| PD13771      | XIAP   | cna | gain    | BASIS    |
| PD14442      | XIAP   | cna | gain    | BASIS    |
| PD23562      | XIAP   | cna | hetloss | BASIS    |
| PD23574      | XIAP   | cna | gain    | BASIS    |
| PD23578      | XIAP   | cna | hetloss | BASIS    |
| PD24202      | XIAP   | cna | hetloss | BASIS    |
| PD24206      | XIAP   | cna | gain    | BASIS    |
| PD3905       | XIAP   | cna | gain    | BASIS    |
| PD4107       | XIAP   | cna | gain    | BASIS    |
| PD4826       | XIAP   | cna | gain    | BASIS    |
| PD4967       | XIAP   | cna | gain    | BASIS    |
| PD5930       | XIAP   | cna | gain    | BASIS    |
| PD5935       | XIAP   | cna | gain    | BASIS    |
| PD5945       | XIAP   | cna | gain    | BASIS    |
| PD5948       | XIAP   | cna | gain    | BASIS    |
| PD6406       | XIAP   | cna | gain    | BASIS    |
| PD6413       | XIAP   | cna | gain    | BASIS    |
| PD7215       | XIAP   | cna | gain    | BASIS    |
| PD8621       | XIAP   | cna | amp     | BASIS    |
| PD8980       | XIAP   | cna | hetloss | BASIS    |
| PD9004       | XIAP   | cna | gain    | BASIS    |
| TCGA-AN-A0XU | ZNF300 | cna | hetloss | TCGA     |
| TCGA-AO-A0JL | ZNF300 | cna | gain    | TCGA     |
| TCGA-BH-A0C0 | ZNF300 | cna | hetloss | TCGA     |
| TCGA-BH-A1FU | ZNF300 | cna | hetloss | TCGA     |
| TCGA-C8-A12L | ZNF300 | cna | hetloss | TCGA     |
| TCGA-D8-A27M | ZNF300 | cna | hetloss | TCGA     |
| TCGA-E2-A1L7 | ZNF300 | cna | hetloss | TCGA     |
| TCGA-E9-A1NC | ZNF300 | cna | hetloss | TCGA     |
| TCGA-LL-A5YP | ZNF300 | cna | hetloss | TCGA     |
| MB-0346      | ZNF300 | cna | gain    | METABRIC |
| MB-5070      | ZNF300 | cna | hetloss | METABRIC |
| MB-5465      | ZNF300 | cna | hetloss | METABRIC |
| MB-6098      | ZNF300 | cna | hetloss | METABRIC |
| MB-7038      | ZNF300 | cna | hetloss | METABRIC |
| MB-0420      | ZNF300 | cna | hetloss | METABRIC |
| PD10014      | ZNF300 | cna | hetloss | BASIS    |
| PD13296      | ZNF300 | cna | hetloss | BASIS    |
| PD13297      | ZNF300 | cna | hetloss | BASIS    |
| PD13771      | ZNF300 | cna | gain    | BASIS    |
| PD22355      | ZNF300 | cna | hetloss | BASIS    |
| PD23578      | ZNF300 | cna | hetloss | BASIS    |
| PD24186      | ZNF300 | cna | gain    | BASIS    |
| PD24202      | ZNF300 | cna | hetloss | BASIS    |
| PD24206      | ZNF300 | cna | gain    | BASIS    |

|              |        |     |         |          |
|--------------|--------|-----|---------|----------|
| PD24337      | ZNF300 | cna | hetloss | BASIS    |
| PD3890       | ZNF300 | cna | hetloss | BASIS    |
| PD3905       | ZNF300 | cna | gain    | BASIS    |
| PD4005       | ZNF300 | cna | hetloss | BASIS    |
| PD4826       | ZNF300 | cna | gain    | BASIS    |
| PD5935       | ZNF300 | cna | gain    | BASIS    |
| PD5945       | ZNF300 | cna | gain    | BASIS    |
| PD6406       | ZNF300 | cna | hetloss | BASIS    |
| PD6413       | ZNF300 | cna | hetloss | BASIS    |
| PD7067       | ZNF300 | cna | gain    | BASIS    |
| PD8621       | ZNF300 | cna | hetloss | BASIS    |
| PD8980       | ZNF300 | cna | hetloss | BASIS    |
| PD9585       | ZNF300 | cna | hetloss | BASIS    |
| TCGA-A2-A25B | ABI1   | cna | gain    | TCGA     |
| TCGA-AN-A0XU | ABI1   | cna | hetloss | TCGA     |
| TCGA-AO-A0JL | ABI1   | cna | gain    | TCGA     |
| TCGA-BH-A0AW | ABI1   | cna | gain    | TCGA     |
| TCGA-BH-A0C0 | ABI1   | cna | gain    | TCGA     |
| TCGA-C8-A12L | ABI1   | cna | gain    | TCGA     |
| TCGA-LL-A5YP | ABI1   | cna | gain    | TCGA     |
| MB-6098      | ABI1   | cna | gain    | METABRIC |
| MB-7038      | ABI1   | cna | hetloss | METABRIC |
| MB-7048      | ABI1   | cna | hetloss | METABRIC |
| MTS-T0064    | ABI1   | cna | gain    | METABRIC |
| PD11327      | ABI1   | cna | gain    | BASIS    |
| PD13296      | ABI1   | cna | gain    | BASIS    |
| PD13299      | ABI1   | cna | gain    | BASIS    |
| PD13771      | ABI1   | cna | gain    | BASIS    |
| PD23562      | ABI1   | cna | amp     | BASIS    |
| PD23574      | ABI1   | cna | gain    | BASIS    |
| PD24186      | ABI1   | cna | gain    | BASIS    |
| PD24202      | ABI1   | cna | hetloss | BASIS    |
| PD3905       | ABI1   | cna | gain    | BASIS    |
| PD4005       | ABI1   | cna | gain    | BASIS    |
| PD4006       | ABI1   | cna | gain    | BASIS    |
| PD4107       | ABI1   | cna | gain    | BASIS    |
| PD4826       | ABI1   | cna | gain    | BASIS    |
| PD4967       | ABI1   | cna | hetloss | BASIS    |
| PD5930       | ABI1   | cna | gain    | BASIS    |
| PD5945       | ABI1   | cna | amp     | BASIS    |
| PD5948       | ABI1   | cna | gain    | BASIS    |
| PD6406       | ABI1   | cna | hetloss | BASIS    |
| PD6413       | ABI1   | cna | gain    | BASIS    |
| PD7067       | ABI1   | cna | amp     | BASIS    |
| PD7215       | ABI1   | cna | gain    | BASIS    |
| PD8621       | ABI1   | cna | gain    | BASIS    |
| PD8980       | ABI1   | cna | gain    | BASIS    |



|              |         |     |         |          |
|--------------|---------|-----|---------|----------|
| PD9004       | ABI1    | cna | gain    | BASIS    |
| PD9702       | ABI1    | cna | gain    | BASIS    |
| TCGA-AN-A0XU | AJUBA   | cna | hetloss | TCGA     |
| TCGA-AO-A0JL | AJUBA   | cna | hetloss | TCGA     |
| TCGA-BH-A0AW | AJUBA   | cna | hetloss | TCGA     |
| TCGA-BH-A1FU | AJUBA   | cna | gain    | TCGA     |
| TCGA-D8-A27M | AJUBA   | cna | hetloss | TCGA     |
| TCGA-LL-A5YP | AJUBA   | cna | hetloss | TCGA     |
| MB-2827      | AJUBA   | cna | amp     | METABRIC |
| MB-5070      | AJUBA   | cna | hetloss | METABRIC |
| MB-6060      | AJUBA   | cna | gain    | METABRIC |
| MB-7048      | AJUBA   | cna | hetloss | METABRIC |
| PD10014      | AJUBA   | cna | gain    | BASIS    |
| PD11327      | AJUBA   | cna | homdel  | BASIS    |
| PD13299      | AJUBA   | cna | gain    | BASIS    |
| PD14442      | AJUBA   | cna | hetloss | BASIS    |
| PD22355      | AJUBA   | cna | hetloss | BASIS    |
| PD23574      | AJUBA   | cna | gain    | BASIS    |
| PD23578      | AJUBA   | cna | hetloss | BASIS    |
| PD24186      | AJUBA   | cna | gain    | BASIS    |
| PD24202      | AJUBA   | cna | hetloss | BASIS    |
| PD24206      | AJUBA   | cna | gain    | BASIS    |
| PD3890       | AJUBA   | cna | hetloss | BASIS    |
| PD3905       | AJUBA   | cna | gain    | BASIS    |
| PD4005       | AJUBA   | cna | hetloss | BASIS    |
| PD4826       | AJUBA   | cna | gain    | BASIS    |
| PD4967       | AJUBA   | cna | hetloss | BASIS    |
| PD5930       | AJUBA   | cna | hetloss | BASIS    |
| PD5935       | AJUBA   | cna | gain    | BASIS    |
| PD5945       | AJUBA   | cna | amp     | BASIS    |
| PD5948       | AJUBA   | cna | gain    | BASIS    |
| PD6406       | AJUBA   | cna | hetloss | BASIS    |
| PD6731       | AJUBA   | cna | hetloss | BASIS    |
| PD7215       | AJUBA   | cna | gain    | BASIS    |
| PD8621       | AJUBA   | cna | gain    | BASIS    |
| PD8980       | AJUBA   | cna | amp     | BASIS    |
| PD9004       | AJUBA   | cna | gain    | BASIS    |
| PD9702       | AJUBA   | cna | gain    | BASIS    |
| TCGA-A2-A25B | ALOX12B | cna | hetloss | TCGA     |
| TCGA-AN-A0XU | ALOX12B | cna | hetloss | TCGA     |
| TCGA-AO-A0JL | ALOX12B | cna | gain    | TCGA     |
| TCGA-BH-A0AW | ALOX12B | cna | hetloss | TCGA     |
| TCGA-BH-A0C0 | ALOX12B | cna | hetloss | TCGA     |
| TCGA-C8-A12L | ALOX12B | cna | hetloss | TCGA     |
| TCGA-D8-A27M | ALOX12B | cna | hetloss | TCGA     |
| TCGA-E2-A1L7 | ALOX12B | cna | hetloss | TCGA     |
| TCGA-E9-A1NC | ALOX12B | cna | hetloss | TCGA     |

|              |         |     |         |          |
|--------------|---------|-----|---------|----------|
| TCGA-LL-A5YP | ALOX12B | cna | gain    | TCGA     |
| MB-0346      | ALOX12B | cna | hetloss | METABRIC |
| MB-2827      | ALOX12B | cna | hetloss | METABRIC |
| MB-5070      | ALOX12B | cna | hetloss | METABRIC |
| MB-5107      | ALOX12B | cna | hetloss | METABRIC |
| MB-6098      | ALOX12B | cna | hetloss | METABRIC |
| MB-6271      | ALOX12B | cna | hetloss | METABRIC |
| MB-7048      | ALOX12B | cna | hetloss | METABRIC |
| MB-0420      | ALOX12B | cna | hetloss | METABRIC |
| PD11742      | ALOX12B | cna | hetloss | BASIS    |
| PD13296      | ALOX12B | cna | hetloss | BASIS    |
| PD13771      | ALOX12B | cna | hetloss | BASIS    |
| PD22355      | ALOX12B | cna | hetloss | BASIS    |
| PD24202      | ALOX12B | cna | hetloss | BASIS    |
| PD24206      | ALOX12B | cna | hetloss | BASIS    |
| PD24337      | ALOX12B | cna | hetloss | BASIS    |
| PD3890       | ALOX12B | cna | hetloss | BASIS    |
| PD3905       | ALOX12B | cna | gain    | BASIS    |
| PD4005       | ALOX12B | cna | homdel  | BASIS    |
| PD4826       | ALOX12B | cna | hetloss | BASIS    |
| PD4967       | ALOX12B | cna | hetloss | BASIS    |
| PD5945       | ALOX12B | cna | gain    | BASIS    |
| PD6406       | ALOX12B | cna | hetloss | BASIS    |
| PD6413       | ALOX12B | cna | hetloss | BASIS    |
| PD6731       | ALOX12B | cna | hetloss | BASIS    |
| PD7067       | ALOX12B | cna | gain    | BASIS    |
| PD9585       | ALOX12B | cna | hetloss | BASIS    |
| TCGA-AN-A0XU | APCDD1  | cna | hetloss | TCGA     |
| TCGA-AO-A0JL | APCDD1  | cna | gain    | TCGA     |
| TCGA-BH-A0AW | APCDD1  | cna | gain    | TCGA     |
| TCGA-BH-A0C0 | APCDD1  | cna | hetloss | TCGA     |
| TCGA-BH-A1FU | APCDD1  | cna | gain    | TCGA     |
| TCGA-C8-A12L | APCDD1  | cna | gain    | TCGA     |
| TCGA-D8-A27M | APCDD1  | cna | hetloss | TCGA     |
| TCGA-LL-A5YP | APCDD1  | cna | gain    | TCGA     |
| MB-0346      | APCDD1  | cna | gain    | METABRIC |
| MB-5107      | APCDD1  | cna | hetloss | METABRIC |
| MB-5465      | APCDD1  | cna | hetloss | METABRIC |
| MB-6098      | APCDD1  | cna | hetloss | METABRIC |
| MB-0420      | APCDD1  | cna | gain    | METABRIC |
| PD13296      | APCDD1  | cna | hetloss | BASIS    |
| PD13299      | APCDD1  | cna | gain    | BASIS    |
| PD23574      | APCDD1  | cna | gain    | BASIS    |
| PD24186      | APCDD1  | cna | gain    | BASIS    |
| PD24206      | APCDD1  | cna | gain    | BASIS    |
| PD24337      | APCDD1  | cna | hetloss | BASIS    |
| PD3890       | APCDD1  | cna | hetloss | BASIS    |

|              |        |     |         |          |
|--------------|--------|-----|---------|----------|
| PD3905       | APCDD1 | cna | gain    | BASIS    |
| PD4005       | APCDD1 | cna | hetloss | BASIS    |
| PD4006       | APCDD1 | cna | gain    | BASIS    |
| PD4107       | APCDD1 | cna | gain    | BASIS    |
| PD4967       | APCDD1 | cna | hetloss | BASIS    |
| PD5930       | APCDD1 | cna | gain    | BASIS    |
| PD5935       | APCDD1 | cna | gain    | BASIS    |
| PD5945       | APCDD1 | cna | amp     | BASIS    |
| PD5948       | APCDD1 | cna | gain    | BASIS    |
| PD7067       | APCDD1 | cna | gain    | BASIS    |
| PD7215       | APCDD1 | cna | gain    | BASIS    |
| PD8621       | APCDD1 | cna | gain    | BASIS    |
| PD8980       | APCDD1 | cna | hetloss | BASIS    |
| PD9004       | APCDD1 | cna | gain    | BASIS    |
| PD9585       | APCDD1 | cna | hetloss | BASIS    |
| PD9702       | APCDD1 | cna | gain    | BASIS    |
| TCGA-A2-A25B | ARAF   | cna | gain    | TCGA     |
| TCGA-AN-A0XU | ARAF   | cna | hetloss | TCGA     |
| TCGA-AO-A0JL | ARAF   | cna | gain    | TCGA     |
| TCGA-BH-A0AW | ARAF   | cna | gain    | TCGA     |
| TCGA-E2-A1L7 | ARAF   | cna | hetloss | TCGA     |
| TCGA-E9-A1NC | ARAF   | cna | hetloss | TCGA     |
| MB-0346      | ARAF   | cna | hetloss | METABRIC |
| MB-2827      | ARAF   | cna | hetloss | METABRIC |
| MB-5465      | ARAF   | cna | gain    | METABRIC |
| MB-6098      | ARAF   | cna | hetloss | METABRIC |
| MB-0420      | ARAF   | cna | hetloss | METABRIC |
| PD10014      | ARAF   | cna | hetloss | BASIS    |
| PD11327      | ARAF   | cna | homdel  | BASIS    |
| PD13296      | ARAF   | cna | gain    | BASIS    |
| PD13299      | ARAF   | cna | amp     | BASIS    |
| PD13771      | ARAF   | cna | gain    | BASIS    |
| PD14442      | ARAF   | cna | gain    | BASIS    |
| PD23562      | ARAF   | cna | hetloss | BASIS    |
| PD23574      | ARAF   | cna | gain    | BASIS    |
| PD24206      | ARAF   | cna | homdel  | BASIS    |
| PD3905       | ARAF   | cna | gain    | BASIS    |
| PD4005       | ARAF   | cna | hetloss | BASIS    |
| PD4006       | ARAF   | cna | hetloss | BASIS    |
| PD4107       | ARAF   | cna | gain    | BASIS    |
| PD4826       | ARAF   | cna | gain    | BASIS    |
| PD4967       | ARAF   | cna | gain    | BASIS    |
| PD5935       | ARAF   | cna | gain    | BASIS    |
| PD5945       | ARAF   | cna | gain    | BASIS    |
| PD5948       | ARAF   | cna | gain    | BASIS    |
| PD6406       | ARAF   | cna | gain    | BASIS    |
| PD6413       | ARAF   | cna | gain    | BASIS    |

|              |        |     |         |          |
|--------------|--------|-----|---------|----------|
| PD7067       | ARAF   | cna | amp     | BASIS    |
| PD7215       | ARAF   | cna | gain    | BASIS    |
| PD8621       | ARAF   | cna | amp     | BASIS    |
| PD8980       | ARAF   | cna | hetloss | BASIS    |
| PD9004       | ARAF   | cna | gain    | BASIS    |
| TCGA-A2-A25B | AURKB  | cna | hetloss | TCGA     |
| TCGA-AN-A0XU | AURKB  | cna | hetloss | TCGA     |
| TCGA-AO-A0JL | AURKB  | cna | gain    | TCGA     |
| TCGA-BH-A0AW | AURKB  | cna | hetloss | TCGA     |
| TCGA-BH-A0C0 | AURKB  | cna | hetloss | TCGA     |
| TCGA-C8-A12L | AURKB  | cna | hetloss | TCGA     |
| TCGA-D8-A27M | AURKB  | cna | hetloss | TCGA     |
| TCGA-E2-A1L7 | AURKB  | cna | hetloss | TCGA     |
| TCGA-E9-A1NC | AURKB  | cna | hetloss | TCGA     |
| TCGA-LL-A5YP | AURKB  | cna | gain    | TCGA     |
| MB-0346      | AURKB  | cna | hetloss | METABRIC |
| MB-2827      | AURKB  | cna | hetloss | METABRIC |
| MB-5070      | AURKB  | cna | hetloss | METABRIC |
| MB-5107      | AURKB  | cna | hetloss | METABRIC |
| MB-6098      | AURKB  | cna | hetloss | METABRIC |
| MB-6271      | AURKB  | cna | hetloss | METABRIC |
| MB-7048      | AURKB  | cna | hetloss | METABRIC |
| MB-0420      | AURKB  | cna | hetloss | METABRIC |
| PD11742      | AURKB  | cna | hetloss | BASIS    |
| PD13296      | AURKB  | cna | hetloss | BASIS    |
| PD13771      | AURKB  | cna | hetloss | BASIS    |
| PD22355      | AURKB  | cna | hetloss | BASIS    |
| PD24202      | AURKB  | cna | hetloss | BASIS    |
| PD24206      | AURKB  | cna | hetloss | BASIS    |
| PD24337      | AURKB  | cna | hetloss | BASIS    |
| PD3890       | AURKB  | cna | hetloss | BASIS    |
| PD3905       | AURKB  | cna | gain    | BASIS    |
| PD4005       | AURKB  | cna | homdel  | BASIS    |
| PD4826       | AURKB  | cna | hetloss | BASIS    |
| PD4967       | AURKB  | cna | hetloss | BASIS    |
| PD5945       | AURKB  | cna | gain    | BASIS    |
| PD6406       | AURKB  | cna | hetloss | BASIS    |
| PD6413       | AURKB  | cna | hetloss | BASIS    |
| PD6731       | AURKB  | cna | hetloss | BASIS    |
| PD7067       | AURKB  | cna | gain    | BASIS    |
| PD9585       | AURKB  | cna | hetloss | BASIS    |
| TCGA-A2-A25B | BCL11A | cna | hetloss | TCGA     |
| TCGA-AN-A0XU | BCL11A | cna | gain    | TCGA     |
| TCGA-AO-A0JL | BCL11A | cna | gain    | TCGA     |
| TCGA-BH-A0AW | BCL11A | cna | gain    | TCGA     |
| TCGA-BH-A0C0 | BCL11A | cna | gain    | TCGA     |
| TCGA-D8-A27M | BCL11A | cna | gain    | TCGA     |

|              |        |     |         |          |
|--------------|--------|-----|---------|----------|
| TCGA-E9-A1NC | BCL11A | cna | gain    | TCGA     |
| TCGA-LL-A5YP | BCL11A | cna | gain    | TCGA     |
| MB-2827      | BCL11A | cna | hetloss | METABRIC |
| MB-5465      | BCL11A | cna | amp     | METABRIC |
| MB-6271      | BCL11A | cna | hetloss | METABRIC |
| MB-7038      | BCL11A | cna | gain    | METABRIC |
| PD10014      | BCL11A | cna | gain    | BASIS    |
| PD11327      | BCL11A | cna | gain    | BASIS    |
| PD13296      | BCL11A | cna | gain    | BASIS    |
| PD13297      | BCL11A | cna | gain    | BASIS    |
| PD13299      | BCL11A | cna | gain    | BASIS    |
| PD22355      | BCL11A | cna | gain    | BASIS    |
| PD23562      | BCL11A | cna | gain    | BASIS    |
| PD23578      | BCL11A | cna | gain    | BASIS    |
| PD24186      | BCL11A | cna | gain    | BASIS    |
| PD24202      | BCL11A | cna | gain    | BASIS    |
| PD24206      | BCL11A | cna | gain    | BASIS    |
| PD3890       | BCL11A | cna | hetloss | BASIS    |
| PD3905       | BCL11A | cna | gain    | BASIS    |
| PD4006       | BCL11A | cna | amp     | BASIS    |
| PD4107       | BCL11A | cna | gain    | BASIS    |
| PD5930       | BCL11A | cna | gain    | BASIS    |
| PD5935       | BCL11A | cna | gain    | BASIS    |
| PD5945       | BCL11A | cna | amp     | BASIS    |
| PD5948       | BCL11A | cna | gain    | BASIS    |
| PD7067       | BCL11A | cna | gain    | BASIS    |
| PD7215       | BCL11A | cna | gain    | BASIS    |
| PD8621       | BCL11A | cna | gain    | BASIS    |
| PD9004       | BCL11A | cna | gain    | BASIS    |
| PD9702       | BCL11A | cna | gain    | BASIS    |
| TCGA-A2-A25B | BLM    | cna | gain    | TCGA     |
| TCGA-AN-A0XU | BLM    | cna | gain    | TCGA     |
| TCGA-AO-A0JL | BLM    | cna | hetloss | TCGA     |
| TCGA-BH-A0AW | BLM    | cna | hetloss | TCGA     |
| TCGA-BH-A0C0 | BLM    | cna | gain    | TCGA     |
| TCGA-D8-A27M | BLM    | cna | hetloss | TCGA     |
| TCGA-E2-A1L7 | BLM    | cna | gain    | TCGA     |
| TCGA-LL-A5YP | BLM    | cna | gain    | TCGA     |
| MB-0346      | BLM    | cna | hetloss | METABRIC |
| MB-5465      | BLM    | cna | hetloss | METABRIC |
| MB-7038      | BLM    | cna | gain    | METABRIC |
| MB-7048      | BLM    | cna | gain    | METABRIC |
| MB-0420      | BLM    | cna | gain    | METABRIC |
| MTS-T0064    | BLM    | cna | amp     | METABRIC |
| PD10014      | BLM    | cna | gain    | BASIS    |
| PD11327      | BLM    | cna | hetloss | BASIS    |
| PD11742      | BLM    | cna | hetloss | BASIS    |

|              |        |     |         |          |
|--------------|--------|-----|---------|----------|
| PD13299      | BLM    | cna | gain    | BASIS    |
| PD23562      | BLM    | cna | gain    | BASIS    |
| PD23574      | BLM    | cna | gain    | BASIS    |
| PD23578      | BLM    | cna | gain    | BASIS    |
| PD24202      | BLM    | cna | hetloss | BASIS    |
| PD24206      | BLM    | cna | gain    | BASIS    |
| PD3890       | BLM    | cna | hetloss | BASIS    |
| PD3905       | BLM    | cna | gain    | BASIS    |
| PD4006       | BLM    | cna | gain    | BASIS    |
| PD4107       | BLM    | cna | gain    | BASIS    |
| PD4967       | BLM    | cna | hetloss | BASIS    |
| PD5930       | BLM    | cna | gain    | BASIS    |
| PD5945       | BLM    | cna | gain    | BASIS    |
| PD6413       | BLM    | cna | hetloss | BASIS    |
| PD7067       | BLM    | cna | gain    | BASIS    |
| PD8621       | BLM    | cna | gain    | BASIS    |
| PD8980       | BLM    | cna | gain    | BASIS    |
| PD9585       | BLM    | cna | hetloss | BASIS    |
| PD9702       | BLM    | cna | gain    | BASIS    |
| TCGA-A2-A25B | CARD11 | cna | gain    | TCGA     |
| TCGA-AO-A0JL | CARD11 | cna | gain    | TCGA     |
| TCGA-BH-A0AW | CARD11 | cna | gain    | TCGA     |
| TCGA-BH-A0C0 | CARD11 | cna | hetloss | TCGA     |
| TCGA-C8-A12L | CARD11 | cna | gain    | TCGA     |
| TCGA-D8-A27M | CARD11 | cna | hetloss | TCGA     |
| TCGA-E2-A1L7 | CARD11 | cna | hetloss | TCGA     |
| TCGA-LL-A5YP | CARD11 | cna | homdel  | TCGA     |
| MB-0346      | CARD11 | cna | gain    | METABRIC |
| MB-5107      | CARD11 | cna | hetloss | METABRIC |
| MB-5465      | CARD11 | cna | gain    | METABRIC |
| MB-6098      | CARD11 | cna | hetloss | METABRIC |
| MB-7038      | CARD11 | cna | hetloss | METABRIC |
| MB-0420      | CARD11 | cna | hetloss | METABRIC |
| PD13296      | CARD11 | cna | gain    | BASIS    |
| PD13297      | CARD11 | cna | hetloss | BASIS    |
| PD13771      | CARD11 | cna | gain    | BASIS    |
| PD22355      | CARD11 | cna | hetloss | BASIS    |
| PD23574      | CARD11 | cna | gain    | BASIS    |
| PD24202      | CARD11 | cna | gain    | BASIS    |
| PD24206      | CARD11 | cna | gain    | BASIS    |
| PD24337      | CARD11 | cna | hetloss | BASIS    |
| PD3905       | CARD11 | cna | gain    | BASIS    |
| PD4006       | CARD11 | cna | gain    | BASIS    |
| PD4107       | CARD11 | cna | amp     | BASIS    |
| PD4826       | CARD11 | cna | gain    | BASIS    |
| PD5935       | CARD11 | cna | amp     | BASIS    |
| PD5945       | CARD11 | cna | amp     | BASIS    |

|                   |        |     |         |            |
|-------------------|--------|-----|---------|------------|
| PD6406            | CARD11 | cna | hetloss | BASIS      |
| PD6731            | CARD11 | cna | gain    | BASIS      |
| PD7067            | CARD11 | cna | amp     | BASIS      |
| PD7215            | CARD11 | cna | gain    | BASIS      |
| PD8621            | CARD11 | cna | gain    | BASIS      |
| PD8980            | CARD11 | cna | hetloss | BASIS      |
| PD9004            | CARD11 | cna | gain    | BASIS      |
| PD9702            | CARD11 | cna | gain    | BASIS      |
| TCGA-A2-A25B      | CCND1  | cna | hetloss | TCGA       |
| TCGA-AN-A0XU      | CCND1  | cna | hetloss | TCGA       |
| TCGA-AO-A0JL      | CCND1  | cna | hetloss | TCGA       |
| TCGA-BH-A18R      | CCND1  | cna | amp     | TCGA       |
| TCGA-C8-A12L      | CCND1  | cna | amp     | TCGA       |
| TCGA-EW-A10X      | CCND1  | cna | amp     | TCGA       |
| TCGA-LL-A5YP      | CCND1  | cna | hetloss | TCGA       |
| MB-0346           | CCND1  | cna | gain    | METABRIC   |
| MB-5107           | CCND1  | cna | gain    | METABRIC   |
| MB-6060           | CCND1  | cna | amp     | METABRIC   |
| MB-6271           | CCND1  | cna | amp     | METABRIC   |
| MTS-T0064         | CCND1  | cna | gain    | METABRIC   |
| P-0002591-T01-IM3 | CCND1  | cna | amp     | MSK-IMPACT |
| P-0002858-T01-IM3 | CCND1  | cna | amp     | MSK-IMPACT |
| PD10014           | CCND1  | cna | gain    | BASIS      |
| PD11327           | CCND1  | cna | gain    | BASIS      |
| PD11742           | CCND1  | cna | gain    | BASIS      |
| PD13771           | CCND1  | cna | amp     | BASIS      |
| PD23574           | CCND1  | cna | gain    | BASIS      |
| PD24186           | CCND1  | cna | amp     | BASIS      |
| PD24206           | CCND1  | cna | gain    | BASIS      |
| PD3905            | CCND1  | cna | gain    | BASIS      |
| PD4005            | CCND1  | cna | gain    | BASIS      |
| PD4006            | CCND1  | cna | amp     | BASIS      |
| PD4107            | CCND1  | cna | gain    | BASIS      |
| PD4826            | CCND1  | cna | gain    | BASIS      |
| PD5930            | CCND1  | cna | gain    | BASIS      |
| PD5935            | CCND1  | cna | gain    | BASIS      |
| PD5945            | CCND1  | cna | amp     | BASIS      |
| PD5948            | CCND1  | cna | amp     | BASIS      |
| PD6413            | CCND1  | cna | gain    | BASIS      |
| PD7067            | CCND1  | cna | gain    | BASIS      |
| PD7215            | CCND1  | cna | gain    | BASIS      |
| PD8980            | CCND1  | cna | gain    | BASIS      |
| PD9004            | CCND1  | cna | gain    | BASIS      |
| PD9702            | CCND1  | cna | gain    | BASIS      |
| TCGA-AN-A0XU      | CDH1   | cna | hetloss | TCGA       |
| TCGA-AO-A0JL      | CDH1   | cna | gain    | TCGA       |
| TCGA-BH-A0C0      | CDH1   | cna | hetloss | TCGA       |

|              |      |     |         |          |
|--------------|------|-----|---------|----------|
| TCGA-C8-A12L | CDH1 | cna | gain    | TCGA     |
| TCGA-D8-A27M | CDH1 | cna | hetloss | TCGA     |
| TCGA-E2-A1L7 | CDH1 | cna | hetloss | TCGA     |
| TCGA-E9-A1NC | CDH1 | cna | hetloss | TCGA     |
| TCGA-LL-A5YP | CDH1 | cna | gain    | TCGA     |
| MB-0346      | CDH1 | cna | gain    | METABRIC |
| MB-2827      | CDH1 | cna | hetloss | METABRIC |
| MB-5107      | CDH1 | cna | hetloss | METABRIC |
| MB-6271      | CDH1 | cna | hetloss | METABRIC |
| MB-7032      | CDH1 | cna | gain    | METABRIC |
| MB-7048      | CDH1 | cna | homdel  | METABRIC |
| MB-0420      | CDH1 | cna | hetloss | METABRIC |
| MTS-T0064    | CDH1 | cna | hetloss | METABRIC |
| PD10014      | CDH1 | cna | hetloss | BASIS    |
| PD11327      | CDH1 | cna | homdel  | BASIS    |
| PD11742      | CDH1 | cna | hetloss | BASIS    |
| PD13297      | CDH1 | cna | hetloss | BASIS    |
| PD13299      | CDH1 | cna | gain    | BASIS    |
| PD14442      | CDH1 | cna | homdel  | BASIS    |
| PD23562      | CDH1 | cna | gain    | BASIS    |
| PD24186      | CDH1 | cna | gain    | BASIS    |
| PD24202      | CDH1 | cna | hetloss | BASIS    |
| PD24206      | CDH1 | cna | hetloss | BASIS    |
| PD3890       | CDH1 | cna | gain    | BASIS    |
| PD3905       | CDH1 | cna | gain    | BASIS    |
| PD4005       | CDH1 | cna | hetloss | BASIS    |
| PD4967       | CDH1 | cna | homdel  | BASIS    |
| PD5945       | CDH1 | cna | gain    | BASIS    |
| PD5948       | CDH1 | cna | hetloss | BASIS    |
| PD7215       | CDH1 | cna | gain    | BASIS    |
| PD8980       | CDH1 | cna | hetloss | BASIS    |
| PD9585       | CDH1 | cna | hetloss | BASIS    |
| PD9702       | CDH1 | cna | gain    | BASIS    |
| TCGA-AN-A0XU | CNBP | cna | gain    | TCGA     |
| TCGA-BH-A0C0 | CNBP | cna | gain    | TCGA     |
| TCGA-BH-A18R | CNBP | cna | gain    | TCGA     |
| TCGA-BH-A1FU | CNBP | cna | hetloss | TCGA     |
| TCGA-C8-A12L | CNBP | cna | gain    | TCGA     |
| TCGA-E2-A1L7 | CNBP | cna | hetloss | TCGA     |
| TCGA-LL-A5YP | CNBP | cna | gain    | TCGA     |
| MB-0346      | CNBP | cna | hetloss | METABRIC |
| MB-5070      | CNBP | cna | gain    | METABRIC |
| MB-5107      | CNBP | cna | gain    | METABRIC |
| MB-5465      | CNBP | cna | gain    | METABRIC |
| MB-6098      | CNBP | cna | hetloss | METABRIC |
| MB-7038      | CNBP | cna | gain    | METABRIC |
| PD10014      | CNBP | cna | gain    | BASIS    |



|              |        |     |         |          |
|--------------|--------|-----|---------|----------|
| PD11327      | CNBP   | cna | gain    | BASIS    |
| PD13297      | CNBP   | cna | hetloss | BASIS    |
| PD13299      | CNBP   | cna | gain    | BASIS    |
| PD13771      | CNBP   | cna | hetloss | BASIS    |
| PD23561      | CNBP   | cna | hetloss | BASIS    |
| PD23574      | CNBP   | cna | gain    | BASIS    |
| PD24186      | CNBP   | cna | gain    | BASIS    |
| PD24206      | CNBP   | cna | gain    | BASIS    |
| PD3905       | CNBP   | cna | gain    | BASIS    |
| PD4005       | CNBP   | cna | hetloss | BASIS    |
| PD4107       | CNBP   | cna | gain    | BASIS    |
| PD4826       | CNBP   | cna | gain    | BASIS    |
| PD5935       | CNBP   | cna | gain    | BASIS    |
| PD5945       | CNBP   | cna | gain    | BASIS    |
| PD5948       | CNBP   | cna | gain    | BASIS    |
| PD6731       | CNBP   | cna | gain    | BASIS    |
| PD7067       | CNBP   | cna | gain    | BASIS    |
| PD7215       | CNBP   | cna | gain    | BASIS    |
| PD8621       | CNBP   | cna | gain    | BASIS    |
| PD8980       | CNBP   | cna | gain    | BASIS    |
| PD9004       | CNBP   | cna | gain    | BASIS    |
| PD9702       | CNBP   | cna | gain    | BASIS    |
| TCGA-AN-A0XU | CRIPAK | cna | hetloss | TCGA     |
| TCGA-BH-A0AW | CRIPAK | cna | hetloss | TCGA     |
| TCGA-BH-A0C0 | CRIPAK | cna | hetloss | TCGA     |
| TCGA-BH-A1FU | CRIPAK | cna | hetloss | TCGA     |
| TCGA-C8-A12L | CRIPAK | cna | gain    | TCGA     |
| TCGA-D8-A27M | CRIPAK | cna | amp     | TCGA     |
| TCGA-E9-A1NC | CRIPAK | cna | hetloss | TCGA     |
| TCGA-LL-A5YP | CRIPAK | cna | hetloss | TCGA     |
| MB-0346      | CRIPAK | cna | hetloss | METABRIC |
| MB-2827      | CRIPAK | cna | hetloss | METABRIC |
| MB-5070      | CRIPAK | cna | gain    | METABRIC |
| MB-5465      | CRIPAK | cna | hetloss | METABRIC |
| MB-6060      | CRIPAK | cna | hetloss | METABRIC |
| MB-6098      | CRIPAK | cna | hetloss | METABRIC |
| MB-7038      | CRIPAK | cna | gain    | METABRIC |
| MTS-T0064    | CRIPAK | cna | homdel  | METABRIC |
| PD10014      | CRIPAK | cna | hetloss | BASIS    |
| PD11327      | CRIPAK | cna | gain    | BASIS    |
| PD13296      | CRIPAK | cna | hetloss | BASIS    |
| PD13297      | CRIPAK | cna | hetloss | BASIS    |
| PD22355      | CRIPAK | cna | hetloss | BASIS    |
| PD24186      | CRIPAK | cna | gain    | BASIS    |
| PD24202      | CRIPAK | cna | hetloss | BASIS    |
| PD24206      | CRIPAK | cna | gain    | BASIS    |
| PD3890       | CRIPAK | cna | hetloss | BASIS    |

|              |        |     |         |          |
|--------------|--------|-----|---------|----------|
| PD3905       | CRIPAK | cna | gain    | BASIS    |
| PD4005       | CRIPAK | cna | hetloss | BASIS    |
| PD4006       | CRIPAK | cna | gain    | BASIS    |
| PD4826       | CRIPAK | cna | hetloss | BASIS    |
| PD5945       | CRIPAK | cna | gain    | BASIS    |
| PD6406       | CRIPAK | cna | hetloss | BASIS    |
| PD6413       | CRIPAK | cna | hetloss | BASIS    |
| PD7067       | CRIPAK | cna | gain    | BASIS    |
| PD8621       | CRIPAK | cna | gain    | BASIS    |
| PD8980       | CRIPAK | cna | hetloss | BASIS    |
| PD9585       | CRIPAK | cna | hetloss | BASIS    |
| TCGA-A2-A25B | CRTC3  | cna | gain    | TCGA     |
| TCGA-AN-A0XU | CRTC3  | cna | gain    | TCGA     |
| TCGA-AO-A0JL | CRTC3  | cna | hetloss | TCGA     |
| TCGA-BH-A0AW | CRTC3  | cna | hetloss | TCGA     |
| TCGA-BH-A0C0 | CRTC3  | cna | gain    | TCGA     |
| TCGA-D8-A27M | CRTC3  | cna | hetloss | TCGA     |
| TCGA-E2-A1L7 | CRTC3  | cna | gain    | TCGA     |
| TCGA-LL-A5YP | CRTC3  | cna | gain    | TCGA     |
| MB-0346      | CRTC3  | cna | hetloss | METABRIC |
| MB-5465      | CRTC3  | cna | hetloss | METABRIC |
| MB-7038      | CRTC3  | cna | gain    | METABRIC |
| MB-7048      | CRTC3  | cna | gain    | METABRIC |
| MB-0420      | CRTC3  | cna | gain    | METABRIC |
| MTS-T0064    | CRTC3  | cna | amp     | METABRIC |
| PD10014      | CRTC3  | cna | gain    | BASIS    |
| PD11327      | CRTC3  | cna | hetloss | BASIS    |
| PD11742      | CRTC3  | cna | hetloss | BASIS    |
| PD13299      | CRTC3  | cna | gain    | BASIS    |
| PD23562      | CRTC3  | cna | gain    | BASIS    |
| PD23574      | CRTC3  | cna | gain    | BASIS    |
| PD23578      | CRTC3  | cna | gain    | BASIS    |
| PD24202      | CRTC3  | cna | hetloss | BASIS    |
| PD24206      | CRTC3  | cna | gain    | BASIS    |
| PD3890       | CRTC3  | cna | hetloss | BASIS    |
| PD3905       | CRTC3  | cna | gain    | BASIS    |
| PD4006       | CRTC3  | cna | gain    | BASIS    |
| PD4107       | CRTC3  | cna | gain    | BASIS    |
| PD4967       | CRTC3  | cna | hetloss | BASIS    |
| PD5930       | CRTC3  | cna | gain    | BASIS    |
| PD5945       | CRTC3  | cna | gain    | BASIS    |
| PD6413       | CRTC3  | cna | hetloss | BASIS    |
| PD7067       | CRTC3  | cna | gain    | BASIS    |
| PD8621       | CRTC3  | cna | gain    | BASIS    |
| PD8980       | CRTC3  | cna | gain    | BASIS    |
| PD9585       | CRTC3  | cna | hetloss | BASIS    |
| PD9702       | CRTC3  | cna | gain    | BASIS    |

|              |        |     |         |          |
|--------------|--------|-----|---------|----------|
| TCGA-AN-A0XU | CYLD   | cna | hetloss | TCGA     |
| TCGA-AO-A0JL | CYLD   | cna | gain    | TCGA     |
| TCGA-BH-A0AW | CYLD   | cna | hetloss | TCGA     |
| TCGA-BH-A0C0 | CYLD   | cna | hetloss | TCGA     |
| TCGA-C8-A12L | CYLD   | cna | gain    | TCGA     |
| TCGA-D8-A27M | CYLD   | cna | gain    | TCGA     |
| TCGA-E2-A1L7 | CYLD   | cna | hetloss | TCGA     |
| TCGA-LL-A5YP | CYLD   | cna | gain    | TCGA     |
| MB-0346      | CYLD   | cna | gain    | METABRIC |
| MB-5070      | CYLD   | cna | hetloss | METABRIC |
| MB-5465      | CYLD   | cna | hetloss | METABRIC |
| MB-6271      | CYLD   | cna | hetloss | METABRIC |
| MB-7032      | CYLD   | cna | gain    | METABRIC |
| MB-7048      | CYLD   | cna | hetloss | METABRIC |
| MB-0420      | CYLD   | cna | hetloss | METABRIC |
| MTS-T0064    | CYLD   | cna | hetloss | METABRIC |
| PD10014      | CYLD   | cna | hetloss | BASIS    |
| PD11327      | CYLD   | cna | gain    | BASIS    |
| PD11742      | CYLD   | cna | hetloss | BASIS    |
| PD13297      | CYLD   | cna | hetloss | BASIS    |
| PD13299      | CYLD   | cna | gain    | BASIS    |
| PD14442      | CYLD   | cna | hetloss | BASIS    |
| PD22355      | CYLD   | cna | hetloss | BASIS    |
| PD23562      | CYLD   | cna | gain    | BASIS    |
| PD24186      | CYLD   | cna | gain    | BASIS    |
| PD24202      | CYLD   | cna | hetloss | BASIS    |
| PD24206      | CYLD   | cna | gain    | BASIS    |
| PD24337      | CYLD   | cna | hetloss | BASIS    |
| PD3905       | CYLD   | cna | gain    | BASIS    |
| PD4005       | CYLD   | cna | hetloss | BASIS    |
| PD4967       | CYLD   | cna | hetloss | BASIS    |
| PD5945       | CYLD   | cna | amp     | BASIS    |
| PD5948       | CYLD   | cna | hetloss | BASIS    |
| PD7067       | CYLD   | cna | hetloss | BASIS    |
| PD7215       | CYLD   | cna | gain    | BASIS    |
| PD9585       | CYLD   | cna | hetloss | BASIS    |
| TCGA-AO-A0JL | D2HGDH | cna | hetloss | TCGA     |
| TCGA-BH-A0AW | D2HGDH | cna | hetloss | TCGA     |
| TCGA-C8-A12L | D2HGDH | cna | hetloss | TCGA     |
| TCGA-D8-A27M | D2HGDH | cna | gain    | TCGA     |
| TCGA-E2-A1L7 | D2HGDH | cna | hetloss | TCGA     |
| TCGA-E9-A1NC | D2HGDH | cna | hetloss | TCGA     |
| MB-5070      | D2HGDH | cna | hetloss | METABRIC |
| MB-5107      | D2HGDH | cna | hetloss | METABRIC |
| MB-6060      | D2HGDH | cna | hetloss | METABRIC |
| MB-6098      | D2HGDH | cna | hetloss | METABRIC |
| MB-6271      | D2HGDH | cna | hetloss | METABRIC |

|              |        |     |         |          |
|--------------|--------|-----|---------|----------|
| MB-7048      | D2HGDH | cna | hetloss | METABRIC |
| PD10014      | D2HGDH | cna | gain    | BASIS    |
| PD11327      | D2HGDH | cna | gain    | BASIS    |
| PD11742      | D2HGDH | cna | hetloss | BASIS    |
| PD13296      | D2HGDH | cna | homdel  | BASIS    |
| PD13297      | D2HGDH | cna | hetloss | BASIS    |
| PD23578      | D2HGDH | cna | hetloss | BASIS    |
| PD24186      | D2HGDH | cna | gain    | BASIS    |
| PD24202      | D2HGDH | cna | hetloss | BASIS    |
| PD24206      | D2HGDH | cna | gain    | BASIS    |
| PD3890       | D2HGDH | cna | hetloss | BASIS    |
| PD3905       | D2HGDH | cna | gain    | BASIS    |
| PD4005       | D2HGDH | cna | hetloss | BASIS    |
| PD4006       | D2HGDH | cna | gain    | BASIS    |
| PD4967       | D2HGDH | cna | hetloss | BASIS    |
| PD5935       | D2HGDH | cna | gain    | BASIS    |
| PD5945       | D2HGDH | cna | gain    | BASIS    |
| PD5948       | D2HGDH | cna | gain    | BASIS    |
| PD6406       | D2HGDH | cna | hetloss | BASIS    |
| PD6413       | D2HGDH | cna | hetloss | BASIS    |
| PD6731       | D2HGDH | cna | hetloss | BASIS    |
| PD7067       | D2HGDH | cna | gain    | BASIS    |
| PD7215       | D2HGDH | cna | gain    | BASIS    |
| PD8980       | D2HGDH | cna | hetloss | BASIS    |
| PD9585       | D2HGDH | cna | hetloss | BASIS    |
| TCGA-A2-A25B | DDX6   | cna | hetloss | TCGA     |
| TCGA-AO-A0JL | DDX6   | cna | hetloss | TCGA     |
| TCGA-BH-A0C0 | DDX6   | cna | hetloss | TCGA     |
| TCGA-BH-A18R | DDX6   | cna | homdel  | TCGA     |
| TCGA-D8-A27M | DDX6   | cna | hetloss | TCGA     |
| TCGA-E2-A1L7 | DDX6   | cna | hetloss | TCGA     |
| TCGA-EW-A10X | DDX6   | cna | homdel  | TCGA     |
| TCGA-LL-A5YP | DDX6   | cna | hetloss | TCGA     |
| MB-0346      | DDX6   | cna | hetloss | METABRIC |
| MB-5070      | DDX6   | cna | hetloss | METABRIC |
| MB-5107      | DDX6   | cna | hetloss | METABRIC |
| MB-6271      | DDX6   | cna | hetloss | METABRIC |
| MB-7032      | DDX6   | cna | hetloss | METABRIC |
| MB-7048      | DDX6   | cna | hetloss | METABRIC |
| PD11742      | DDX6   | cna | hetloss | BASIS    |
| PD13296      | DDX6   | cna | hetloss | BASIS    |
| PD13297      | DDX6   | cna | hetloss | BASIS    |
| PD13771      | DDX6   | cna | hetloss | BASIS    |
| PD22355      | DDX6   | cna | hetloss | BASIS    |
| PD23574      | DDX6   | cna | gain    | BASIS    |
| PD23578      | DDX6   | cna | hetloss | BASIS    |
| PD24186      | DDX6   | cna | gain    | BASIS    |

|              |       |     |         |          |
|--------------|-------|-----|---------|----------|
| PD24206      | DDX6  | cna | gain    | BASIS    |
| PD24337      | DDX6  | cna | hetloss | BASIS    |
| PD3905       | DDX6  | cna | gain    | BASIS    |
| PD4005       | DDX6  | cna | hetloss | BASIS    |
| PD4826       | DDX6  | cna | hetloss | BASIS    |
| PD5935       | DDX6  | cna | gain    | BASIS    |
| PD5945       | DDX6  | cna | gain    | BASIS    |
| PD5948       | DDX6  | cna | gain    | BASIS    |
| PD6413       | DDX6  | cna | hetloss | BASIS    |
| PD6731       | DDX6  | cna | hetloss | BASIS    |
| PD7067       | DDX6  | cna | gain    | BASIS    |
| PD7215       | DDX6  | cna | gain    | BASIS    |
| PD9004       | DDX6  | cna | hetloss | BASIS    |
| PD9702       | DDX6  | cna | gain    | BASIS    |
| TCGA-AN-A0XU | DOT1L | cna | hetloss | TCGA     |
| TCGA-AO-A0JL | DOT1L | cna | gain    | TCGA     |
| TCGA-BH-A0C0 | DOT1L | cna | gain    | TCGA     |
| TCGA-BH-A1FU | DOT1L | cna | hetloss | TCGA     |
| TCGA-C8-A12L | DOT1L | cna | hetloss | TCGA     |
| TCGA-D8-A27M | DOT1L | cna | hetloss | TCGA     |
| TCGA-E9-A1NC | DOT1L | cna | hetloss | TCGA     |
| TCGA-EW-A10X | DOT1L | cna | hetloss | TCGA     |
| TCGA-LL-A5YP | DOT1L | cna | hetloss | TCGA     |
| MB-0346      | DOT1L | cna | gain    | METABRIC |
| MB-2827      | DOT1L | cna | hetloss | METABRIC |
| MB-5070      | DOT1L | cna | hetloss | METABRIC |
| MB-6098      | DOT1L | cna | hetloss | METABRIC |
| MB-7038      | DOT1L | cna | hetloss | METABRIC |
| MB-0420      | DOT1L | cna | hetloss | METABRIC |
| PD11742      | DOT1L | cna | hetloss | BASIS    |
| PD14442      | DOT1L | cna | hetloss | BASIS    |
| PD22355      | DOT1L | cna | hetloss | BASIS    |
| PD23574      | DOT1L | cna | gain    | BASIS    |
| PD23578      | DOT1L | cna | hetloss | BASIS    |
| PD24202      | DOT1L | cna | hetloss | BASIS    |
| PD24206      | DOT1L | cna | hetloss | BASIS    |
| PD3890       | DOT1L | cna | hetloss | BASIS    |
| PD3905       | DOT1L | cna | gain    | BASIS    |
| PD4006       | DOT1L | cna | gain    | BASIS    |
| PD4826       | DOT1L | cna | hetloss | BASIS    |
| PD4967       | DOT1L | cna | hetloss | BASIS    |
| PD5930       | DOT1L | cna | gain    | BASIS    |
| PD5945       | DOT1L | cna | gain    | BASIS    |
| PD5948       | DOT1L | cna | gain    | BASIS    |
| PD7067       | DOT1L | cna | gain    | BASIS    |
| PD7215       | DOT1L | cna | gain    | BASIS    |
| PD8621       | DOT1L | cna | gain    | BASIS    |

|              |        |     |         |          |
|--------------|--------|-----|---------|----------|
| PD8980       | DOT1L  | cna | gain    | BASIS    |
| PD9004       | DOT1L  | cna | hetloss | BASIS    |
| PD9585       | DOT1L  | cna | hetloss | BASIS    |
| TCGA-A2-A25B | EIF1AX | cna | gain    | TCGA     |
| TCGA-AN-A0XU | EIF1AX | cna | hetloss | TCGA     |
| TCGA-AO-A0JL | EIF1AX | cna | gain    | TCGA     |
| TCGA-BH-A0AW | EIF1AX | cna | gain    | TCGA     |
| TCGA-E2-A1L7 | EIF1AX | cna | hetloss | TCGA     |
| TCGA-E9-A1NC | EIF1AX | cna | hetloss | TCGA     |
| TCGA-LL-A5YP | EIF1AX | cna | hetloss | TCGA     |
| MB-0346      | EIF1AX | cna | hetloss | METABRIC |
| MB-2827      | EIF1AX | cna | hetloss | METABRIC |
| MB-5465      | EIF1AX | cna | gain    | METABRIC |
| MB-6098      | EIF1AX | cna | hetloss | METABRIC |
| MB-0420      | EIF1AX | cna | hetloss | METABRIC |
| PD10014      | EIF1AX | cna | hetloss | BASIS    |
| PD11327      | EIF1AX | cna | hetloss | BASIS    |
| PD11742      | EIF1AX | cna | gain    | BASIS    |
| PD13296      | EIF1AX | cna | amp     | BASIS    |
| PD13297      | EIF1AX | cna | gain    | BASIS    |
| PD13299      | EIF1AX | cna | gain    | BASIS    |
| PD13771      | EIF1AX | cna | gain    | BASIS    |
| PD14442      | EIF1AX | cna | gain    | BASIS    |
| PD23562      | EIF1AX | cna | hetloss | BASIS    |
| PD23574      | EIF1AX | cna | gain    | BASIS    |
| PD24206      | EIF1AX | cna | homdel  | BASIS    |
| PD3905       | EIF1AX | cna | gain    | BASIS    |
| PD4005       | EIF1AX | cna | hetloss | BASIS    |
| PD4006       | EIF1AX | cna | hetloss | BASIS    |
| PD4826       | EIF1AX | cna | gain    | BASIS    |
| PD4967       | EIF1AX | cna | gain    | BASIS    |
| PD5935       | EIF1AX | cna | gain    | BASIS    |
| PD6406       | EIF1AX | cna | gain    | BASIS    |
| PD6413       | EIF1AX | cna | gain    | BASIS    |
| PD7215       | EIF1AX | cna | gain    | BASIS    |
| PD8621       | EIF1AX | cna | amp     | BASIS    |
| PD8980       | EIF1AX | cna | hetloss | BASIS    |
| PD9004       | EIF1AX | cna | gain    | BASIS    |
| PD9702       | EIF1AX | cna | hetloss | BASIS    |
| TCGA-A2-A25B | EIF2B1 | cna | gain    | TCGA     |
| TCGA-AN-A0XU | EIF2B1 | cna | hetloss | TCGA     |
| TCGA-AO-A0JL | EIF2B1 | cna | hetloss | TCGA     |
| TCGA-BH-A0C0 | EIF2B1 | cna | hetloss | TCGA     |
| TCGA-BH-A18R | EIF2B1 | cna | gain    | TCGA     |
| TCGA-BH-A1FU | EIF2B1 | cna | hetloss | TCGA     |
| TCGA-D8-A27M | EIF2B1 | cna | hetloss | TCGA     |
| TCGA-E2-A1L7 | EIF2B1 | cna | hetloss | TCGA     |

|              |        |     |         |          |
|--------------|--------|-----|---------|----------|
| TCGA-LL-A5YP | EIF2B1 | cna | hetloss | TCGA     |
| MB-0346      | EIF2B1 | cna | gain    | METABRIC |
| MB-2827      | EIF2B1 | cna | hetloss | METABRIC |
| MB-5070      | EIF2B1 | cna | hetloss | METABRIC |
| MB-7048      | EIF2B1 | cna | hetloss | METABRIC |
| MTS-T0064    | EIF2B1 | cna | gain    | METABRIC |
| PD11327      | EIF2B1 | cna | homdel  | BASIS    |
| PD13296      | EIF2B1 | cna | hetloss | BASIS    |
| PD13297      | EIF2B1 | cna | gain    | BASIS    |
| PD13771      | EIF2B1 | cna | gain    | BASIS    |
| PD22355      | EIF2B1 | cna | hetloss | BASIS    |
| PD23574      | EIF2B1 | cna | gain    | BASIS    |
| PD23578      | EIF2B1 | cna | hetloss | BASIS    |
| PD3890       | EIF2B1 | cna | hetloss | BASIS    |
| PD3905       | EIF2B1 | cna | gain    | BASIS    |
| PD4005       | EIF2B1 | cna | hetloss | BASIS    |
| PD4006       | EIF2B1 | cna | amp     | BASIS    |
| PD4107       | EIF2B1 | cna | gain    | BASIS    |
| PD4826       | EIF2B1 | cna | gain    | BASIS    |
| PD4967       | EIF2B1 | cna | hetloss | BASIS    |
| PD5935       | EIF2B1 | cna | gain    | BASIS    |
| PD5945       | EIF2B1 | cna | gain    | BASIS    |
| PD5948       | EIF2B1 | cna | gain    | BASIS    |
| PD6406       | EIF2B1 | cna | hetloss | BASIS    |
| PD6731       | EIF2B1 | cna | hetloss | BASIS    |
| PD7067       | EIF2B1 | cna | gain    | BASIS    |
| PD9585       | EIF2B1 | cna | hetloss | BASIS    |
| PD9702       | EIF2B1 | cna | gain    | BASIS    |
| TCGA-A2-A25B | EP300  | cna | hetloss | TCGA     |
| TCGA-AN-A0XU | EP300  | cna | hetloss | TCGA     |
| TCGA-BH-A0AW | EP300  | cna | hetloss | TCGA     |
| TCGA-BH-A1FU | EP300  | cna | gain    | TCGA     |
| TCGA-C8-A12L | EP300  | cna | gain    | TCGA     |
| TCGA-D8-A27M | EP300  | cna | gain    | TCGA     |
| TCGA-E9-A1NC | EP300  | cna | gain    | TCGA     |
| MB-2827      | EP300  | cna | hetloss | METABRIC |
| MB-5465      | EP300  | cna | gain    | METABRIC |
| MB-6098      | EP300  | cna | gain    | METABRIC |
| PD11327      | EP300  | cna | gain    | BASIS    |
| PD11742      | EP300  | cna | hetloss | BASIS    |
| PD13296      | EP300  | cna | gain    | BASIS    |
| PD13297      | EP300  | cna | hetloss | BASIS    |
| PD13299      | EP300  | cna | gain    | BASIS    |
| PD14442      | EP300  | cna | hetloss | BASIS    |
| PD22355      | EP300  | cna | gain    | BASIS    |
| PD23562      | EP300  | cna | gain    | BASIS    |
| PD23578      | EP300  | cna | gain    | BASIS    |

|              |       |     |         |          |
|--------------|-------|-----|---------|----------|
| PD24202      | EP300 | cna | hetloss | BASIS    |
| PD24206      | EP300 | cna | homdel  | BASIS    |
| PD3905       | EP300 | cna | gain    | BASIS    |
| PD4005       | EP300 | cna | gain    | BASIS    |
| PD4006       | EP300 | cna | gain    | BASIS    |
| PD4107       | EP300 | cna | gain    | BASIS    |
| PD4826       | EP300 | cna | gain    | BASIS    |
| PD4967       | EP300 | cna | hetloss | BASIS    |
| PD5935       | EP300 | cna | gain    | BASIS    |
| PD5945       | EP300 | cna | amp     | BASIS    |
| PD5948       | EP300 | cna | gain    | BASIS    |
| PD6731       | EP300 | cna | hetloss | BASIS    |
| PD7067       | EP300 | cna | gain    | BASIS    |
| PD7215       | EP300 | cna | gain    | BASIS    |
| PD8621       | EP300 | cna | gain    | BASIS    |
| PD9004       | EP300 | cna | gain    | BASIS    |
| PD9702       | EP300 | cna | gain    | BASIS    |
| TCGA-A2-A25B | EPHA2 | cna | hetloss | TCGA     |
| TCGA-AN-A0XU | EPHA2 | cna | hetloss | TCGA     |
| TCGA-AO-A0JL | EPHA2 | cna | hetloss | TCGA     |
| TCGA-BH-A0AW | EPHA2 | cna | gain    | TCGA     |
| TCGA-BH-A0C0 | EPHA2 | cna | hetloss | TCGA     |
| TCGA-BH-A18R | EPHA2 | cna | homdel  | TCGA     |
| TCGA-BH-A1FU | EPHA2 | cna | gain    | TCGA     |
| TCGA-C8-A12L | EPHA2 | cna | hetloss | TCGA     |
| TCGA-D8-A27M | EPHA2 | cna | gain    | TCGA     |
| TCGA-E2-A1L7 | EPHA2 | cna | hetloss | TCGA     |
| TCGA-E9-A1NC | EPHA2 | cna | hetloss | TCGA     |
| TCGA-LL-A5YP | EPHA2 | cna | hetloss | TCGA     |
| MB-2827      | EPHA2 | cna | hetloss | METABRIC |
| MB-5070      | EPHA2 | cna | hetloss | METABRIC |
| MB-5465      | EPHA2 | cna | hetloss | METABRIC |
| MB-6060      | EPHA2 | cna | hetloss | METABRIC |
| MB-6098      | EPHA2 | cna | hetloss | METABRIC |
| MB-0420      | EPHA2 | cna | hetloss | METABRIC |
| PD10014      | EPHA2 | cna | gain    | BASIS    |
| PD11327      | EPHA2 | cna | hetloss | BASIS    |
| PD11742      | EPHA2 | cna | hetloss | BASIS    |
| PD13296      | EPHA2 | cna | hetloss | BASIS    |
| PD13771      | EPHA2 | cna | hetloss | BASIS    |
| PD22355      | EPHA2 | cna | hetloss | BASIS    |
| PD24202      | EPHA2 | cna | hetloss | BASIS    |
| PD24206      | EPHA2 | cna | gain    | BASIS    |
| PD24337      | EPHA2 | cna | hetloss | BASIS    |
| PD3890       | EPHA2 | cna | hetloss | BASIS    |
| PD3905       | EPHA2 | cna | gain    | BASIS    |
| PD4826       | EPHA2 | cna | gain    | BASIS    |



|              |       |     |         |          |
|--------------|-------|-----|---------|----------|
| PD5945       | EPHA2 | cna | gain    | BASIS    |
| PD6406       | EPHA2 | cna | hetloss | BASIS    |
| PD7067       | EPHA2 | cna | gain    | BASIS    |
| PD7215       | EPHA2 | cna | gain    | BASIS    |
| PD9004       | EPHA2 | cna | hetloss | BASIS    |
| PD9585       | EPHA2 | cna | hetloss | BASIS    |
| TCGA-A2-A25B | EPHB2 | cna | hetloss | TCGA     |
| TCGA-AN-A0XU | EPHB2 | cna | hetloss | TCGA     |
| TCGA-AO-A0JL | EPHB2 | cna | hetloss | TCGA     |
| TCGA-BH-A0AW | EPHB2 | cna | gain    | TCGA     |
| TCGA-BH-A0C0 | EPHB2 | cna | hetloss | TCGA     |
| TCGA-BH-A18R | EPHB2 | cna | homdel  | TCGA     |
| TCGA-BH-A1FU | EPHB2 | cna | gain    | TCGA     |
| TCGA-C8-A12L | EPHB2 | cna | hetloss | TCGA     |
| TCGA-D8-A27M | EPHB2 | cna | gain    | TCGA     |
| TCGA-E2-A1L7 | EPHB2 | cna | hetloss | TCGA     |
| TCGA-E9-A1NC | EPHB2 | cna | hetloss | TCGA     |
| TCGA-LL-A5YP | EPHB2 | cna | hetloss | TCGA     |
| MB-2827      | EPHB2 | cna | hetloss | METABRIC |
| MB-5070      | EPHB2 | cna | hetloss | METABRIC |
| MB-5465      | EPHB2 | cna | hetloss | METABRIC |
| MB-6060      | EPHB2 | cna | hetloss | METABRIC |
| MB-6098      | EPHB2 | cna | hetloss | METABRIC |
| MB-6271      | EPHB2 | cna | hetloss | METABRIC |
| PD10014      | EPHB2 | cna | gain    | BASIS    |
| PD11742      | EPHB2 | cna | hetloss | BASIS    |
| PD13296      | EPHB2 | cna | hetloss | BASIS    |
| PD13771      | EPHB2 | cna | hetloss | BASIS    |
| PD22355      | EPHB2 | cna | hetloss | BASIS    |
| PD24186      | EPHB2 | cna | gain    | BASIS    |
| PD24202      | EPHB2 | cna | hetloss | BASIS    |
| PD24206      | EPHB2 | cna | gain    | BASIS    |
| PD24337      | EPHB2 | cna | hetloss | BASIS    |
| PD3890       | EPHB2 | cna | hetloss | BASIS    |
| PD3905       | EPHB2 | cna | gain    | BASIS    |
| PD4006       | EPHB2 | cna | gain    | BASIS    |
| PD4826       | EPHB2 | cna | gain    | BASIS    |
| PD5945       | EPHB2 | cna | amp     | BASIS    |
| PD7067       | EPHB2 | cna | gain    | BASIS    |
| PD7215       | EPHB2 | cna | gain    | BASIS    |
| PD9004       | EPHB2 | cna | hetloss | BASIS    |
| PD9585       | EPHB2 | cna | hetloss | BASIS    |
| TCGA-A2-A25B | FANCI | cna | gain    | TCGA     |
| TCGA-AN-A0XU | FANCI | cna | gain    | TCGA     |
| TCGA-AO-A0JL | FANCI | cna | hetloss | TCGA     |
| TCGA-BH-A0AW | FANCI | cna | hetloss | TCGA     |
| TCGA-BH-A0C0 | FANCI | cna | gain    | TCGA     |

|                   |       |     |         |            |
|-------------------|-------|-----|---------|------------|
| TCGA-D8-A27M      | FANCI | cna | hetloss | TCGA       |
| TCGA-E2-A1L7      | FANCI | cna | gain    | TCGA       |
| TCGA-LL-A5YP      | FANCI | cna | gain    | TCGA       |
| MB-0346           | FANCI | cna | hetloss | METABRIC   |
| MB-5465           | FANCI | cna | hetloss | METABRIC   |
| MB-7038           | FANCI | cna | gain    | METABRIC   |
| MB-7048           | FANCI | cna | amp     | METABRIC   |
| MB-0420           | FANCI | cna | gain    | METABRIC   |
| MTS-T0064         | FANCI | cna | amp     | METABRIC   |
| PD10014           | FANCI | cna | gain    | BASIS      |
| PD11742           | FANCI | cna | hetloss | BASIS      |
| PD13299           | FANCI | cna | gain    | BASIS      |
| PD23562           | FANCI | cna | gain    | BASIS      |
| PD23574           | FANCI | cna | gain    | BASIS      |
| PD23578           | FANCI | cna | gain    | BASIS      |
| PD24202           | FANCI | cna | hetloss | BASIS      |
| PD24206           | FANCI | cna | gain    | BASIS      |
| PD24337           | FANCI | cna | gain    | BASIS      |
| PD3890            | FANCI | cna | hetloss | BASIS      |
| PD3905            | FANCI | cna | gain    | BASIS      |
| PD4006            | FANCI | cna | gain    | BASIS      |
| PD4107            | FANCI | cna | gain    | BASIS      |
| PD4967            | FANCI | cna | hetloss | BASIS      |
| PD5930            | FANCI | cna | gain    | BASIS      |
| PD5945            | FANCI | cna | gain    | BASIS      |
| PD6413            | FANCI | cna | hetloss | BASIS      |
| PD7067            | FANCI | cna | gain    | BASIS      |
| PD8621            | FANCI | cna | gain    | BASIS      |
| PD8980            | FANCI | cna | gain    | BASIS      |
| PD9585            | FANCI | cna | hetloss | BASIS      |
| PD9702            | FANCI | cna | gain    | BASIS      |
| TCGA-A2-A25B      | FGF19 | cna | hetloss | TCGA       |
| TCGA-AN-A0XU      | FGF19 | cna | hetloss | TCGA       |
| TCGA-AO-A0JL      | FGF19 | cna | hetloss | TCGA       |
| TCGA-BH-A18R      | FGF19 | cna | amp     | TCGA       |
| TCGA-C8-A12L      | FGF19 | cna | amp     | TCGA       |
| TCGA-EW-A10X      | FGF19 | cna | amp     | TCGA       |
| TCGA-LL-A5YP      | FGF19 | cna | hetloss | TCGA       |
| MB-0346           | FGF19 | cna | gain    | METABRIC   |
| MB-5107           | FGF19 | cna | gain    | METABRIC   |
| MB-6060           | FGF19 | cna | amp     | METABRIC   |
| MB-6271           | FGF19 | cna | amp     | METABRIC   |
| MTS-T0064         | FGF19 | cna | gain    | METABRIC   |
| P-0002591-T01-IM3 | FGF19 | cna | amp     | MSK-IMPACT |
| P-0002858-T01-IM3 | FGF19 | cna | amp     | MSK-IMPACT |
| PD10014           | FGF19 | cna | gain    | BASIS      |
| PD11327           | FGF19 | cna | gain    | BASIS      |

|                   |       |     |         |            |
|-------------------|-------|-----|---------|------------|
| PD11742           | FGF19 | cna | gain    | BASIS      |
| PD13771           | FGF19 | cna | amp     | BASIS      |
| PD23574           | FGF19 | cna | gain    | BASIS      |
| PD24186           | FGF19 | cna | amp     | BASIS      |
| PD24206           | FGF19 | cna | gain    | BASIS      |
| PD3905            | FGF19 | cna | gain    | BASIS      |
| PD4005            | FGF19 | cna | gain    | BASIS      |
| PD4006            | FGF19 | cna | amp     | BASIS      |
| PD4107            | FGF19 | cna | gain    | BASIS      |
| PD4826            | FGF19 | cna | gain    | BASIS      |
| PD5930            | FGF19 | cna | gain    | BASIS      |
| PD5935            | FGF19 | cna | gain    | BASIS      |
| PD5945            | FGF19 | cna | amp     | BASIS      |
| PD5948            | FGF19 | cna | amp     | BASIS      |
| PD6413            | FGF19 | cna | gain    | BASIS      |
| PD7067            | FGF19 | cna | gain    | BASIS      |
| PD7215            | FGF19 | cna | gain    | BASIS      |
| PD8980            | FGF19 | cna | gain    | BASIS      |
| PD9004            | FGF19 | cna | gain    | BASIS      |
| PD9702            | FGF19 | cna | gain    | BASIS      |
| TCGA-A2-A25B      | FGF3  | cna | hetloss | TCGA       |
| TCGA-AN-A0XU      | FGF3  | cna | hetloss | TCGA       |
| TCGA-AO-A0JL      | FGF3  | cna | hetloss | TCGA       |
| TCGA-BH-A18R      | FGF3  | cna | amp     | TCGA       |
| TCGA-C8-A12L      | FGF3  | cna | amp     | TCGA       |
| TCGA-EW-A10X      | FGF3  | cna | amp     | TCGA       |
| TCGA-LL-A5YP      | FGF3  | cna | hetloss | TCGA       |
| MB-0346           | FGF3  | cna | gain    | METABRIC   |
| MB-5107           | FGF3  | cna | gain    | METABRIC   |
| MB-6060           | FGF3  | cna | amp     | METABRIC   |
| MB-6271           | FGF3  | cna | amp     | METABRIC   |
| MTS-T0064         | FGF3  | cna | gain    | METABRIC   |
| P-0002591-T01-IM3 | FGF3  | cna | amp     | MSK-IMPACT |
| P-0002858-T01-IM3 | FGF3  | cna | amp     | MSK-IMPACT |
| PD10014           | FGF3  | cna | gain    | BASIS      |
| PD11327           | FGF3  | cna | gain    | BASIS      |
| PD11742           | FGF3  | cna | gain    | BASIS      |
| PD13771           | FGF3  | cna | amp     | BASIS      |
| PD23574           | FGF3  | cna | gain    | BASIS      |
| PD24186           | FGF3  | cna | amp     | BASIS      |
| PD24206           | FGF3  | cna | gain    | BASIS      |
| PD3905            | FGF3  | cna | gain    | BASIS      |
| PD4005            | FGF3  | cna | gain    | BASIS      |
| PD4006            | FGF3  | cna | amp     | BASIS      |
| PD4107            | FGF3  | cna | gain    | BASIS      |
| PD4826            | FGF3  | cna | gain    | BASIS      |
| PD5930            | FGF3  | cna | gain    | BASIS      |

|                   |       |     |         |            |
|-------------------|-------|-----|---------|------------|
| PD5935            | FGF3  | cna | gain    | BASIS      |
| PD5945            | FGF3  | cna | amp     | BASIS      |
| PD5948            | FGF3  | cna | amp     | BASIS      |
| PD6413            | FGF3  | cna | gain    | BASIS      |
| PD7067            | FGF3  | cna | gain    | BASIS      |
| PD7215            | FGF3  | cna | gain    | BASIS      |
| PD8980            | FGF3  | cna | gain    | BASIS      |
| PD9004            | FGF3  | cna | gain    | BASIS      |
| PD9702            | FGF3  | cna | gain    | BASIS      |
| TCGA-A2-A25B      | FGF4  | cna | hetloss | TCGA       |
| TCGA-AN-A0XU      | FGF4  | cna | hetloss | TCGA       |
| TCGA-AO-A0JL      | FGF4  | cna | hetloss | TCGA       |
| TCGA-BH-A18R      | FGF4  | cna | amp     | TCGA       |
| TCGA-C8-A12L      | FGF4  | cna | amp     | TCGA       |
| TCGA-EW-A10X      | FGF4  | cna | amp     | TCGA       |
| TCGA-LL-A5YP      | FGF4  | cna | hetloss | TCGA       |
| MB-0346           | FGF4  | cna | gain    | METABRIC   |
| MB-5107           | FGF4  | cna | gain    | METABRIC   |
| MB-6060           | FGF4  | cna | amp     | METABRIC   |
| MB-6271           | FGF4  | cna | amp     | METABRIC   |
| MTS-T0064         | FGF4  | cna | gain    | METABRIC   |
| P-0002591-T01-IM3 | FGF4  | cna | amp     | MSK-IMPACT |
| P-0002858-T01-IM3 | FGF4  | cna | amp     | MSK-IMPACT |
| PD10014           | FGF4  | cna | gain    | BASIS      |
| PD11327           | FGF4  | cna | gain    | BASIS      |
| PD11742           | FGF4  | cna | gain    | BASIS      |
| PD13771           | FGF4  | cna | amp     | BASIS      |
| PD23574           | FGF4  | cna | gain    | BASIS      |
| PD24186           | FGF4  | cna | amp     | BASIS      |
| PD24206           | FGF4  | cna | gain    | BASIS      |
| PD3905            | FGF4  | cna | gain    | BASIS      |
| PD4005            | FGF4  | cna | gain    | BASIS      |
| PD4006            | FGF4  | cna | amp     | BASIS      |
| PD4107            | FGF4  | cna | gain    | BASIS      |
| PD4826            | FGF4  | cna | gain    | BASIS      |
| PD5930            | FGF4  | cna | gain    | BASIS      |
| PD5935            | FGF4  | cna | gain    | BASIS      |
| PD5945            | FGF4  | cna | amp     | BASIS      |
| PD5948            | FGF4  | cna | amp     | BASIS      |
| PD6413            | FGF4  | cna | gain    | BASIS      |
| PD7067            | FGF4  | cna | gain    | BASIS      |
| PD7215            | FGF4  | cna | gain    | BASIS      |
| PD8980            | FGF4  | cna | gain    | BASIS      |
| PD9004            | FGF4  | cna | gain    | BASIS      |
| PD9702            | FGF4  | cna | gain    | BASIS      |
| TCGA-AN-A0XU      | FGFR3 | cna | hetloss | TCGA       |
| TCGA-BH-A0AW      | FGFR3 | cna | hetloss | TCGA       |

|                   |       |     |         |            |
|-------------------|-------|-----|---------|------------|
| TCGA-BH-A0C0      | FGFR3 | cna | hetloss | TCGA       |
| TCGA-BH-A1FU      | FGFR3 | cna | hetloss | TCGA       |
| TCGA-C8-A12L      | FGFR3 | cna | gain    | TCGA       |
| TCGA-D8-A27M      | FGFR3 | cna | amp     | TCGA       |
| TCGA-E9-A1NC      | FGFR3 | cna | hetloss | TCGA       |
| TCGA-LL-A5YP      | FGFR3 | cna | hetloss | TCGA       |
| MB-0346           | FGFR3 | cna | hetloss | METABRIC   |
| MB-2827           | FGFR3 | cna | hetloss | METABRIC   |
| MB-5070           | FGFR3 | cna | gain    | METABRIC   |
| MB-5465           | FGFR3 | cna | hetloss | METABRIC   |
| MB-6060           | FGFR3 | cna | hetloss | METABRIC   |
| MB-6098           | FGFR3 | cna | hetloss | METABRIC   |
| MB-7038           | FGFR3 | cna | gain    | METABRIC   |
| MTS-T0064         | FGFR3 | cna | homdel  | METABRIC   |
| P-0009557-T01-IM5 | FGFR3 | cna | homdel  | MSK-IMPACT |
| PD10014           | FGFR3 | cna | hetloss | BASIS      |
| PD11327           | FGFR3 | cna | gain    | BASIS      |
| PD13296           | FGFR3 | cna | hetloss | BASIS      |
| PD13297           | FGFR3 | cna | hetloss | BASIS      |
| PD24186           | FGFR3 | cna | gain    | BASIS      |
| PD24202           | FGFR3 | cna | hetloss | BASIS      |
| PD24206           | FGFR3 | cna | gain    | BASIS      |
| PD3890            | FGFR3 | cna | hetloss | BASIS      |
| PD3905            | FGFR3 | cna | gain    | BASIS      |
| PD4005            | FGFR3 | cna | hetloss | BASIS      |
| PD4006            | FGFR3 | cna | gain    | BASIS      |
| PD4826            | FGFR3 | cna | hetloss | BASIS      |
| PD5945            | FGFR3 | cna | gain    | BASIS      |
| PD6406            | FGFR3 | cna | hetloss | BASIS      |
| PD6413            | FGFR3 | cna | hetloss | BASIS      |
| PD7067            | FGFR3 | cna | gain    | BASIS      |
| PD8621            | FGFR3 | cna | gain    | BASIS      |
| PD8980            | FGFR3 | cna | hetloss | BASIS      |
| PD9585            | FGFR3 | cna | hetloss | BASIS      |
| TCGA-A2-A25B      | FNBP1 | cna | gain    | TCGA       |
| TCGA-AN-A0XU      | FNBP1 | cna | hetloss | TCGA       |
| TCGA-AO-A0JL      | FNBP1 | cna | hetloss | TCGA       |
| TCGA-BH-A0C0      | FNBP1 | cna | gain    | TCGA       |
| TCGA-C8-A12L      | FNBP1 | cna | gain    | TCGA       |
| TCGA-E2-A1L7      | FNBP1 | cna | gain    | TCGA       |
| TCGA-E9-A1NC      | FNBP1 | cna | hetloss | TCGA       |
| TCGA-LL-A5YP      | FNBP1 | cna | hetloss | TCGA       |
| MB-0346           | FNBP1 | cna | hetloss | METABRIC   |
| MB-2827           | FNBP1 | cna | hetloss | METABRIC   |
| MB-5070           | FNBP1 | cna | hetloss | METABRIC   |
| MB-5107           | FNBP1 | cna | gain    | METABRIC   |
| MB-7038           | FNBP1 | cna | hetloss | METABRIC   |

|              |       |     |         |          |
|--------------|-------|-----|---------|----------|
| MB-0420      | FNBP1 | cna | hetloss | METABRIC |
| PD10014      | FNBP1 | cna | gain    | BASIS    |
| PD11327      | FNBP1 | cna | hetloss | BASIS    |
| PD13299      | FNBP1 | cna | gain    | BASIS    |
| PD22355      | FNBP1 | cna | gain    | BASIS    |
| PD23578      | FNBP1 | cna | hetloss | BASIS    |
| PD24186      | FNBP1 | cna | gain    | BASIS    |
| PD24202      | FNBP1 | cna | hetloss | BASIS    |
| PD24337      | FNBP1 | cna | hetloss | BASIS    |
| PD3890       | FNBP1 | cna | hetloss | BASIS    |
| PD3905       | FNBP1 | cna | gain    | BASIS    |
| PD4005       | FNBP1 | cna | hetloss | BASIS    |
| PD4006       | FNBP1 | cna | gain    | BASIS    |
| PD4107       | FNBP1 | cna | hetloss | BASIS    |
| PD5930       | FNBP1 | cna | hetloss | BASIS    |
| PD5945       | FNBP1 | cna | gain    | BASIS    |
| PD5948       | FNBP1 | cna | gain    | BASIS    |
| PD6406       | FNBP1 | cna | hetloss | BASIS    |
| PD6731       | FNBP1 | cna | hetloss | BASIS    |
| PD7067       | FNBP1 | cna | gain    | BASIS    |
| PD7215       | FNBP1 | cna | gain    | BASIS    |
| PD8621       | FNBP1 | cna | gain    | BASIS    |
| PD9004       | FNBP1 | cna | hetloss | BASIS    |
| TCGA-A2-A25B | FUBP1 | cna | gain    | TCGA     |
| TCGA-AN-A0XU | FUBP1 | cna | hetloss | TCGA     |
| TCGA-BH-A0AW | FUBP1 | cna | gain    | TCGA     |
| TCGA-BH-A0C0 | FUBP1 | cna | hetloss | TCGA     |
| TCGA-BH-A1FU | FUBP1 | cna | gain    | TCGA     |
| TCGA-C8-A12L | FUBP1 | cna | hetloss | TCGA     |
| TCGA-D8-A27M | FUBP1 | cna | hetloss | TCGA     |
| TCGA-E2-A1L7 | FUBP1 | cna | amp     | TCGA     |
| TCGA-LL-A5YP | FUBP1 | cna | hetloss | TCGA     |
| MB-0346      | FUBP1 | cna | hetloss | METABRIC |
| MB-6060      | FUBP1 | cna | hetloss | METABRIC |
| MB-6098      | FUBP1 | cna | hetloss | METABRIC |
| MB-7038      | FUBP1 | cna | gain    | METABRIC |
| PD11327      | FUBP1 | cna | gain    | BASIS    |
| PD11742      | FUBP1 | cna | hetloss | BASIS    |
| PD13296      | FUBP1 | cna | hetloss | BASIS    |
| PD13299      | FUBP1 | cna | gain    | BASIS    |
| PD22355      | FUBP1 | cna | hetloss | BASIS    |
| PD23574      | FUBP1 | cna | gain    | BASIS    |
| PD24186      | FUBP1 | cna | gain    | BASIS    |
| PD24206      | FUBP1 | cna | gain    | BASIS    |
| PD3890       | FUBP1 | cna | gain    | BASIS    |
| PD3905       | FUBP1 | cna | gain    | BASIS    |
| PD4006       | FUBP1 | cna | hetloss | BASIS    |

|              |       |     |         |          |
|--------------|-------|-----|---------|----------|
| PD4107       | FUBP1 | cna | gain    | BASIS    |
| PD4826       | FUBP1 | cna | gain    | BASIS    |
| PD5930       | FUBP1 | cna | gain    | BASIS    |
| PD5935       | FUBP1 | cna | gain    | BASIS    |
| PD5945       | FUBP1 | cna | gain    | BASIS    |
| PD5948       | FUBP1 | cna | gain    | BASIS    |
| PD7067       | FUBP1 | cna | gain    | BASIS    |
| PD7215       | FUBP1 | cna | gain    | BASIS    |
| PD8621       | FUBP1 | cna | gain    | BASIS    |
| PD9004       | FUBP1 | cna | gain    | BASIS    |
| PD9585       | FUBP1 | cna | hetloss | BASIS    |
| PD9702       | FUBP1 | cna | gain    | BASIS    |
| TCGA-A2-A25B | FZD10 | cna | gain    | TCGA     |
| TCGA-AN-A0XU | FZD10 | cna | hetloss | TCGA     |
| TCGA-AO-A0JL | FZD10 | cna | hetloss | TCGA     |
| TCGA-BH-A0C0 | FZD10 | cna | hetloss | TCGA     |
| TCGA-BH-A18R | FZD10 | cna | gain    | TCGA     |
| TCGA-BH-A1FU | FZD10 | cna | hetloss | TCGA     |
| TCGA-D8-A27M | FZD10 | cna | hetloss | TCGA     |
| TCGA-E2-A1L7 | FZD10 | cna | hetloss | TCGA     |
| TCGA-E9-A1NC | FZD10 | cna | hetloss | TCGA     |
| TCGA-LL-A5YP | FZD10 | cna | hetloss | TCGA     |
| MB-0346      | FZD10 | cna | gain    | METABRIC |
| MB-2827      | FZD10 | cna | hetloss | METABRIC |
| MB-5070      | FZD10 | cna | hetloss | METABRIC |
| MB-7048      | FZD10 | cna | hetloss | METABRIC |
| MTS-T0064    | FZD10 | cna | gain    | METABRIC |
| PD11327      | FZD10 | cna | gain    | BASIS    |
| PD13296      | FZD10 | cna | hetloss | BASIS    |
| PD13297      | FZD10 | cna | hetloss | BASIS    |
| PD13771      | FZD10 | cna | gain    | BASIS    |
| PD22355      | FZD10 | cna | hetloss | BASIS    |
| PD23574      | FZD10 | cna | gain    | BASIS    |
| PD23578      | FZD10 | cna | hetloss | BASIS    |
| PD24186      | FZD10 | cna | gain    | BASIS    |
| PD3890       | FZD10 | cna | hetloss | BASIS    |
| PD3905       | FZD10 | cna | gain    | BASIS    |
| PD4005       | FZD10 | cna | hetloss | BASIS    |
| PD4006       | FZD10 | cna | amp     | BASIS    |
| PD4107       | FZD10 | cna | gain    | BASIS    |
| PD4826       | FZD10 | cna | gain    | BASIS    |
| PD5935       | FZD10 | cna | gain    | BASIS    |
| PD5945       | FZD10 | cna | homdel  | BASIS    |
| PD5948       | FZD10 | cna | gain    | BASIS    |
| PD6731       | FZD10 | cna | hetloss | BASIS    |
| PD7067       | FZD10 | cna | gain    | BASIS    |
| PD9585       | FZD10 | cna | hetloss | BASIS    |

|              |         |     |         |          |
|--------------|---------|-----|---------|----------|
| PD9702       | FZD10   | cna | gain    | BASIS    |
| TCGA-AN-A0XU | GADD45B | cna | hetloss | TCGA     |
| TCGA-AO-A0JL | GADD45B | cna | gain    | TCGA     |
| TCGA-BH-A0C0 | GADD45B | cna | gain    | TCGA     |
| TCGA-BH-A1FU | GADD45B | cna | hetloss | TCGA     |
| TCGA-C8-A12L | GADD45B | cna | gain    | TCGA     |
| TCGA-D8-A27M | GADD45B | cna | hetloss | TCGA     |
| TCGA-E9-A1NC | GADD45B | cna | hetloss | TCGA     |
| TCGA-EW-A10X | GADD45B | cna | hetloss | TCGA     |
| TCGA-LL-A5YP | GADD45B | cna | hetloss | TCGA     |
| MB-0346      | GADD45B | cna | gain    | METABRIC |
| MB-2827      | GADD45B | cna | hetloss | METABRIC |
| MB-5070      | GADD45B | cna | hetloss | METABRIC |
| MB-6098      | GADD45B | cna | hetloss | METABRIC |
| MB-7038      | GADD45B | cna | hetloss | METABRIC |
| MB-0420      | GADD45B | cna | hetloss | METABRIC |
| PD11742      | GADD45B | cna | hetloss | BASIS    |
| PD14442      | GADD45B | cna | hetloss | BASIS    |
| PD22355      | GADD45B | cna | hetloss | BASIS    |
| PD23574      | GADD45B | cna | gain    | BASIS    |
| PD23578      | GADD45B | cna | hetloss | BASIS    |
| PD24202      | GADD45B | cna | hetloss | BASIS    |
| PD24206      | GADD45B | cna | hetloss | BASIS    |
| PD3890       | GADD45B | cna | hetloss | BASIS    |
| PD3905       | GADD45B | cna | gain    | BASIS    |
| PD4006       | GADD45B | cna | gain    | BASIS    |
| PD4826       | GADD45B | cna | hetloss | BASIS    |
| PD4967       | GADD45B | cna | hetloss | BASIS    |
| PD5930       | GADD45B | cna | gain    | BASIS    |
| PD5945       | GADD45B | cna | gain    | BASIS    |
| PD5948       | GADD45B | cna | gain    | BASIS    |
| PD7067       | GADD45B | cna | gain    | BASIS    |
| PD7215       | GADD45B | cna | gain    | BASIS    |
| PD8621       | GADD45B | cna | gain    | BASIS    |
| PD8980       | GADD45B | cna | gain    | BASIS    |
| PD9004       | GADD45B | cna | hetloss | BASIS    |
| PD9585       | GADD45B | cna | hetloss | BASIS    |
| TCGA-AN-A0XU | GNA11   | cna | hetloss | TCGA     |
| TCGA-AO-A0JL | GNA11   | cna | gain    | TCGA     |
| TCGA-BH-A0C0 | GNA11   | cna | gain    | TCGA     |
| TCGA-BH-A1FU | GNA11   | cna | hetloss | TCGA     |
| TCGA-C8-A12L | GNA11   | cna | amp     | TCGA     |
| TCGA-D8-A27M | GNA11   | cna | hetloss | TCGA     |
| TCGA-E9-A1NC | GNA11   | cna | hetloss | TCGA     |
| TCGA-EW-A10X | GNA11   | cna | hetloss | TCGA     |
| TCGA-LL-A5YP | GNA11   | cna | hetloss | TCGA     |
| MB-0346      | GNA11   | cna | gain    | METABRIC |



|              |       |     |         |          |
|--------------|-------|-----|---------|----------|
| MB-2827      | GNA11 | cna | hetloss | METABRIC |
| MB-5070      | GNA11 | cna | hetloss | METABRIC |
| MB-6098      | GNA11 | cna | hetloss | METABRIC |
| MB-7038      | GNA11 | cna | hetloss | METABRIC |
| MB-0420      | GNA11 | cna | hetloss | METABRIC |
| PD11742      | GNA11 | cna | hetloss | BASIS    |
| PD13296      | GNA11 | cna | gain    | BASIS    |
| PD13299      | GNA11 | cna | gain    | BASIS    |
| PD14442      | GNA11 | cna | hetloss | BASIS    |
| PD22355      | GNA11 | cna | hetloss | BASIS    |
| PD23574      | GNA11 | cna | gain    | BASIS    |
| PD23578      | GNA11 | cna | hetloss | BASIS    |
| PD24202      | GNA11 | cna | hetloss | BASIS    |
| PD24206      | GNA11 | cna | hetloss | BASIS    |
| PD3905       | GNA11 | cna | gain    | BASIS    |
| PD4006       | GNA11 | cna | gain    | BASIS    |
| PD4826       | GNA11 | cna | gain    | BASIS    |
| PD4967       | GNA11 | cna | hetloss | BASIS    |
| PD5930       | GNA11 | cna | gain    | BASIS    |
| PD5945       | GNA11 | cna | gain    | BASIS    |
| PD5948       | GNA11 | cna | gain    | BASIS    |
| PD7067       | GNA11 | cna | gain    | BASIS    |
| PD8621       | GNA11 | cna | gain    | BASIS    |
| PD8980       | GNA11 | cna | gain    | BASIS    |
| PD9004       | GNA11 | cna | hetloss | BASIS    |
| PD9585       | GNA11 | cna | hetloss | BASIS    |
| TCGA-A2-A25B | GPHN  | cna | hetloss | TCGA     |
| TCGA-AO-A0JL | GPHN  | cna | hetloss | TCGA     |
| TCGA-BH-A0AW | GPHN  | cna | hetloss | TCGA     |
| TCGA-BH-A1FU | GPHN  | cna | gain    | TCGA     |
| TCGA-C8-A12L | GPHN  | cna | hetloss | TCGA     |
| TCGA-D8-A27M | GPHN  | cna | hetloss | TCGA     |
| TCGA-E2-A1L7 | GPHN  | cna | hetloss | TCGA     |
| TCGA-LL-A5YP | GPHN  | cna | hetloss | TCGA     |
| MB-2827      | GPHN  | cna | hetloss | METABRIC |
| MB-5070      | GPHN  | cna | hetloss | METABRIC |
| MB-5465      | GPHN  | cna | gain    | METABRIC |
| MB-6098      | GPHN  | cna | hetloss | METABRIC |
| MB-7038      | GPHN  | cna | hetloss | METABRIC |
| PD10014      | GPHN  | cna | hetloss | BASIS    |
| PD11327      | GPHN  | cna | amp     | BASIS    |
| PD11742      | GPHN  | cna | hetloss | BASIS    |
| PD13296      | GPHN  | cna | gain    | BASIS    |
| PD13299      | GPHN  | cna | hetloss | BASIS    |
| PD13771      | GPHN  | cna | hetloss | BASIS    |
| PD14442      | GPHN  | cna | hetloss | BASIS    |
| PD22355      | GPHN  | cna | hetloss | BASIS    |

|              |      |     |         |          |
|--------------|------|-----|---------|----------|
| PD23578      | GPHN | cna | hetloss | BASIS    |
| PD24202      | GPHN | cna | hetloss | BASIS    |
| PD24206      | GPHN | cna | gain    | BASIS    |
| PD24337      | GPHN | cna | hetloss | BASIS    |
| PD3890       | GPHN | cna | hetloss | BASIS    |
| PD3905       | GPHN | cna | gain    | BASIS    |
| PD4005       | GPHN | cna | hetloss | BASIS    |
| PD4006       | GPHN | cna | gain    | BASIS    |
| PD5945       | GPHN | cna | gain    | BASIS    |
| PD6406       | GPHN | cna | hetloss | BASIS    |
| PD7067       | GPHN | cna | gain    | BASIS    |
| PD7215       | GPHN | cna | hetloss | BASIS    |
| PD8980       | GPHN | cna | gain    | BASIS    |
| PD9004       | GPHN | cna | hetloss | BASIS    |
| PD9702       | GPHN | cna | gain    | BASIS    |
| TCGA-A2-A25B | GPS2 | cna | hetloss | TCGA     |
| TCGA-AN-A0XU | GPS2 | cna | hetloss | TCGA     |
| TCGA-AO-A0JL | GPS2 | cna | gain    | TCGA     |
| TCGA-BH-A0AW | GPS2 | cna | hetloss | TCGA     |
| TCGA-BH-A0C0 | GPS2 | cna | hetloss | TCGA     |
| TCGA-C8-A12L | GPS2 | cna | hetloss | TCGA     |
| TCGA-D8-A27M | GPS2 | cna | hetloss | TCGA     |
| TCGA-E2-A1L7 | GPS2 | cna | hetloss | TCGA     |
| TCGA-E9-A1NC | GPS2 | cna | hetloss | TCGA     |
| TCGA-LL-A5YP | GPS2 | cna | gain    | TCGA     |
| MB-0346      | GPS2 | cna | hetloss | METABRIC |
| MB-2827      | GPS2 | cna | hetloss | METABRIC |
| MB-5070      | GPS2 | cna | hetloss | METABRIC |
| MB-5107      | GPS2 | cna | hetloss | METABRIC |
| MB-6271      | GPS2 | cna | hetloss | METABRIC |
| MB-7048      | GPS2 | cna | hetloss | METABRIC |
| MB-0420      | GPS2 | cna | hetloss | METABRIC |
| PD10014      | GPS2 | cna | hetloss | BASIS    |
| PD11742      | GPS2 | cna | hetloss | BASIS    |
| PD13296      | GPS2 | cna | hetloss | BASIS    |
| PD13771      | GPS2 | cna | hetloss | BASIS    |
| PD22355      | GPS2 | cna | hetloss | BASIS    |
| PD24202      | GPS2 | cna | hetloss | BASIS    |
| PD24206      | GPS2 | cna | hetloss | BASIS    |
| PD24337      | GPS2 | cna | hetloss | BASIS    |
| PD3890       | GPS2 | cna | hetloss | BASIS    |
| PD3905       | GPS2 | cna | gain    | BASIS    |
| PD4005       | GPS2 | cna | gain    | BASIS    |
| PD4826       | GPS2 | cna | hetloss | BASIS    |
| PD4967       | GPS2 | cna | hetloss | BASIS    |
| PD5945       | GPS2 | cna | gain    | BASIS    |
| PD6406       | GPS2 | cna | hetloss | BASIS    |

|              |       |     |         |          |
|--------------|-------|-----|---------|----------|
| PD6413       | GPS2  | cna | hetloss | BASIS    |
| PD6731       | GPS2  | cna | hetloss | BASIS    |
| PD7067       | GPS2  | cna | gain    | BASIS    |
| PD9585       | GPS2  | cna | hetloss | BASIS    |
| TCGA-A2-A25B | HDAC1 | cna | hetloss | TCGA     |
| TCGA-AN-A0XU | HDAC1 | cna | hetloss | TCGA     |
| TCGA-AO-A0JL | HDAC1 | cna | hetloss | TCGA     |
| TCGA-BH-A0AW | HDAC1 | cna | gain    | TCGA     |
| TCGA-BH-A0C0 | HDAC1 | cna | hetloss | TCGA     |
| TCGA-BH-A18R | HDAC1 | cna | homdel  | TCGA     |
| TCGA-BH-A1FU | HDAC1 | cna | gain    | TCGA     |
| TCGA-C8-A12L | HDAC1 | cna | hetloss | TCGA     |
| TCGA-D8-A27M | HDAC1 | cna | gain    | TCGA     |
| TCGA-E2-A1L7 | HDAC1 | cna | gain    | TCGA     |
| TCGA-LL-A5YP | HDAC1 | cna | gain    | TCGA     |
| MB-0346      | HDAC1 | cna | hetloss | METABRIC |
| MB-2827      | HDAC1 | cna | hetloss | METABRIC |
| MB-5070      | HDAC1 | cna | hetloss | METABRIC |
| MB-5465      | HDAC1 | cna | hetloss | METABRIC |
| MB-6060      | HDAC1 | cna | hetloss | METABRIC |
| MB-6098      | HDAC1 | cna | hetloss | METABRIC |
| MB-0420      | HDAC1 | cna | hetloss | METABRIC |
| PD10014      | HDAC1 | cna | gain    | BASIS    |
| PD11327      | HDAC1 | cna | hetloss | BASIS    |
| PD11742      | HDAC1 | cna | hetloss | BASIS    |
| PD13296      | HDAC1 | cna | hetloss | BASIS    |
| PD24206      | HDAC1 | cna | gain    | BASIS    |
| PD24337      | HDAC1 | cna | hetloss | BASIS    |
| PD3890       | HDAC1 | cna | hetloss | BASIS    |
| PD3905       | HDAC1 | cna | gain    | BASIS    |
| PD4006       | HDAC1 | cna | gain    | BASIS    |
| PD4826       | HDAC1 | cna | gain    | BASIS    |
| PD5945       | HDAC1 | cna | amp     | BASIS    |
| PD5948       | HDAC1 | cna | hetloss | BASIS    |
| PD7067       | HDAC1 | cna | gain    | BASIS    |
| PD7215       | HDAC1 | cna | gain    | BASIS    |
| PD8980       | HDAC1 | cna | gain    | BASIS    |
| PD9004       | HDAC1 | cna | hetloss | BASIS    |
| PD9585       | HDAC1 | cna | hetloss | BASIS    |
| PD9702       | HDAC1 | cna | gain    | BASIS    |
| TCGA-A2-A25B | HDAC7 | cna | gain    | TCGA     |
| TCGA-AN-A0XU | HDAC7 | cna | gain    | TCGA     |
| TCGA-AO-A0JL | HDAC7 | cna | hetloss | TCGA     |
| TCGA-BH-A0C0 | HDAC7 | cna | hetloss | TCGA     |
| TCGA-BH-A18R | HDAC7 | cna | gain    | TCGA     |
| TCGA-BH-A1FU | HDAC7 | cna | hetloss | TCGA     |
| TCGA-C8-A12L | HDAC7 | cna | gain    | TCGA     |

|              |        |     |         |          |
|--------------|--------|-----|---------|----------|
| TCGA-D8-A27M | HDAC7  | cna | hetloss | TCGA     |
| TCGA-E2-A1L7 | HDAC7  | cna | hetloss | TCGA     |
| TCGA-E9-A1NC | HDAC7  | cna | hetloss | TCGA     |
| TCGA-LL-A5YP | HDAC7  | cna | hetloss | TCGA     |
| MB-0346      | HDAC7  | cna | gain    | METABRIC |
| MB-2827      | HDAC7  | cna | hetloss | METABRIC |
| MB-5070      | HDAC7  | cna | hetloss | METABRIC |
| MB-6060      | HDAC7  | cna | gain    | METABRIC |
| MB-6098      | HDAC7  | cna | hetloss | METABRIC |
| MB-7038      | HDAC7  | cna | hetloss | METABRIC |
| MB-0420      | HDAC7  | cna | hetloss | METABRIC |
| PD11327      | HDAC7  | cna | amp     | BASIS    |
| PD13296      | HDAC7  | cna | hetloss | BASIS    |
| PD13297      | HDAC7  | cna | hetloss | BASIS    |
| PD23574      | HDAC7  | cna | gain    | BASIS    |
| PD23578      | HDAC7  | cna | hetloss | BASIS    |
| PD24202      | HDAC7  | cna | hetloss | BASIS    |
| PD24206      | HDAC7  | cna | gain    | BASIS    |
| PD24337      | HDAC7  | cna | hetloss | BASIS    |
| PD3890       | HDAC7  | cna | hetloss | BASIS    |
| PD3905       | HDAC7  | cna | gain    | BASIS    |
| PD4107       | HDAC7  | cna | hetloss | BASIS    |
| PD4826       | HDAC7  | cna | gain    | BASIS    |
| PD5945       | HDAC7  | cna | gain    | BASIS    |
| PD6731       | HDAC7  | cna | hetloss | BASIS    |
| PD7067       | HDAC7  | cna | gain    | BASIS    |
| PD8621       | HDAC7  | cna | hetloss | BASIS    |
| PD9585       | HDAC7  | cna | hetloss | BASIS    |
| PD9702       | HDAC7  | cna | gain    | BASIS    |
| TCGA-A2-A25B | ICOSLG | cna | hetloss | TCGA     |
| TCGA-AN-A0XU | ICOSLG | cna | hetloss | TCGA     |
| TCGA-BH-A0AW | ICOSLG | cna | gain    | TCGA     |
| TCGA-BH-A0C0 | ICOSLG | cna | hetloss | TCGA     |
| TCGA-BH-A1FU | ICOSLG | cna | gain    | TCGA     |
| TCGA-C8-A12L | ICOSLG | cna | hetloss | TCGA     |
| TCGA-D8-A27M | ICOSLG | cna | hetloss | TCGA     |
| TCGA-LL-A5YP | ICOSLG | cna | gain    | TCGA     |
| MB-2827      | ICOSLG | cna | amp     | METABRIC |
| MB-6098      | ICOSLG | cna | hetloss | METABRIC |
| MB-7048      | ICOSLG | cna | hetloss | METABRIC |
| PD10014      | ICOSLG | cna | hetloss | BASIS    |
| PD11327      | ICOSLG | cna | gain    | BASIS    |
| PD13296      | ICOSLG | cna | gain    | BASIS    |
| PD13297      | ICOSLG | cna | hetloss | BASIS    |
| PD13299      | ICOSLG | cna | gain    | BASIS    |
| PD13771      | ICOSLG | cna | gain    | BASIS    |
| PD23562      | ICOSLG | cna | gain    | BASIS    |

|              |        |     |         |          |
|--------------|--------|-----|---------|----------|
| PD23574      | ICOSLG | cna | gain    | BASIS    |
| PD23578      | ICOSLG | cna | gain    | BASIS    |
| PD24186      | ICOSLG | cna | amp     | BASIS    |
| PD24206      | ICOSLG | cna | gain    | BASIS    |
| PD3905       | ICOSLG | cna | gain    | BASIS    |
| PD4006       | ICOSLG | cna | amp     | BASIS    |
| PD4107       | ICOSLG | cna | gain    | BASIS    |
| PD4826       | ICOSLG | cna | gain    | BASIS    |
| PD5930       | ICOSLG | cna | gain    | BASIS    |
| PD5945       | ICOSLG | cna | gain    | BASIS    |
| PD5948       | ICOSLG | cna | gain    | BASIS    |
| PD6731       | ICOSLG | cna | gain    | BASIS    |
| PD7067       | ICOSLG | cna | gain    | BASIS    |
| PD7215       | ICOSLG | cna | gain    | BASIS    |
| PD8621       | ICOSLG | cna | gain    | BASIS    |
| PD8980       | ICOSLG | cna | hetloss | BASIS    |
| PD9004       | ICOSLG | cna | gain    | BASIS    |
| PD9702       | ICOSLG | cna | gain    | BASIS    |
| TCGA-A2-A25B | ID3    | cna | hetloss | TCGA     |
| TCGA-AN-A0XU | ID3    | cna | hetloss | TCGA     |
| TCGA-AO-A0JL | ID3    | cna | hetloss | TCGA     |
| TCGA-BH-A0AW | ID3    | cna | gain    | TCGA     |
| TCGA-BH-A0C0 | ID3    | cna | hetloss | TCGA     |
| TCGA-BH-A18R | ID3    | cna | homdel  | TCGA     |
| TCGA-BH-A1FU | ID3    | cna | gain    | TCGA     |
| TCGA-C8-A12L | ID3    | cna | hetloss | TCGA     |
| TCGA-D8-A27M | ID3    | cna | gain    | TCGA     |
| TCGA-E2-A1L7 | ID3    | cna | hetloss | TCGA     |
| TCGA-E9-A1NC | ID3    | cna | hetloss | TCGA     |
| TCGA-LL-A5YP | ID3    | cna | hetloss | TCGA     |
| MB-2827      | ID3    | cna | hetloss | METABRIC |
| MB-5070      | ID3    | cna | hetloss | METABRIC |
| MB-5465      | ID3    | cna | hetloss | METABRIC |
| MB-6060      | ID3    | cna | hetloss | METABRIC |
| MB-6098      | ID3    | cna | hetloss | METABRIC |
| MB-6271      | ID3    | cna | hetloss | METABRIC |
| MB-0420      | ID3    | cna | hetloss | METABRIC |
| PD10014      | ID3    | cna | gain    | BASIS    |
| PD11742      | ID3    | cna | hetloss | BASIS    |
| PD13296      | ID3    | cna | hetloss | BASIS    |
| PD13771      | ID3    | cna | hetloss | BASIS    |
| PD22355      | ID3    | cna | hetloss | BASIS    |
| PD24186      | ID3    | cna | gain    | BASIS    |
| PD24206      | ID3    | cna | hetloss | BASIS    |
| PD24337      | ID3    | cna | hetloss | BASIS    |
| PD3890       | ID3    | cna | hetloss | BASIS    |
| PD3905       | ID3    | cna | gain    | BASIS    |

|              |        |     |         |          |
|--------------|--------|-----|---------|----------|
| PD4006       | ID3    | cna | gain    | BASIS    |
| PD4826       | ID3    | cna | gain    | BASIS    |
| PD5945       | ID3    | cna | amp     | BASIS    |
| PD7067       | ID3    | cna | gain    | BASIS    |
| PD7215       | ID3    | cna | gain    | BASIS    |
| PD9004       | ID3    | cna | hetloss | BASIS    |
| PD9585       | ID3    | cna | hetloss | BASIS    |
| TCGA-A2-A25B | IGF1   | cna | gain    | TCGA     |
| TCGA-AO-A0JL | IGF1   | cna | hetloss | TCGA     |
| TCGA-BH-A0C0 | IGF1   | cna | hetloss | TCGA     |
| TCGA-BH-A18R | IGF1   | cna | gain    | TCGA     |
| TCGA-BH-A1FU | IGF1   | cna | hetloss | TCGA     |
| TCGA-C8-A12L | IGF1   | cna | gain    | TCGA     |
| TCGA-D8-A27M | IGF1   | cna | hetloss | TCGA     |
| TCGA-E2-A1L7 | IGF1   | cna | hetloss | TCGA     |
| TCGA-LL-A5YP | IGF1   | cna | hetloss | TCGA     |
| MB-0346      | IGF1   | cna | gain    | METABRIC |
| MB-2827      | IGF1   | cna | hetloss | METABRIC |
| MB-5070      | IGF1   | cna | hetloss | METABRIC |
| MB-5107      | IGF1   | cna | gain    | METABRIC |
| MB-5465      | IGF1   | cna | gain    | METABRIC |
| MB-6098      | IGF1   | cna | hetloss | METABRIC |
| PD10014      | IGF1   | cna | gain    | BASIS    |
| PD11327      | IGF1   | cna | gain    | BASIS    |
| PD11742      | IGF1   | cna | hetloss | BASIS    |
| PD13296      | IGF1   | cna | hetloss | BASIS    |
| PD13297      | IGF1   | cna | gain    | BASIS    |
| PD22355      | IGF1   | cna | hetloss | BASIS    |
| PD3890       | IGF1   | cna | hetloss | BASIS    |
| PD4005       | IGF1   | cna | hetloss | BASIS    |
| PD4006       | IGF1   | cna | gain    | BASIS    |
| PD4107       | IGF1   | cna | gain    | BASIS    |
| PD4826       | IGF1   | cna | gain    | BASIS    |
| PD5945       | IGF1   | cna | gain    | BASIS    |
| PD6406       | IGF1   | cna | hetloss | BASIS    |
| PD6413       | IGF1   | cna | hetloss | BASIS    |
| PD6731       | IGF1   | cna | hetloss | BASIS    |
| PD7067       | IGF1   | cna | gain    | BASIS    |
| PD7215       | IGF1   | cna | hetloss | BASIS    |
| PD8621       | IGF1   | cna | hetloss | BASIS    |
| PD9004       | IGF1   | cna | hetloss | BASIS    |
| PD9585       | IGF1   | cna | hetloss | BASIS    |
| PD9702       | IGF1   | cna | gain    | BASIS    |
| TCGA-A2-A25B | INPP4B | cna | gain    | TCGA     |
| TCGA-AN-A0XU | INPP4B | cna | gain    | TCGA     |
| TCGA-BH-A0AW | INPP4B | cna | gain    | TCGA     |
| TCGA-BH-A0C0 | INPP4B | cna | hetloss | TCGA     |

|              |        |     |         |          |
|--------------|--------|-----|---------|----------|
| TCGA-BH-A18R | INPP4B | cna | amp     | TCGA     |
| TCGA-BH-A1FU | INPP4B | cna | gain    | TCGA     |
| TCGA-C8-A12L | INPP4B | cna | hetloss | TCGA     |
| TCGA-D8-A27M | INPP4B | cna | hetloss | TCGA     |
| TCGA-E2-A1L7 | INPP4B | cna | hetloss | TCGA     |
| TCGA-E9-A1NC | INPP4B | cna | hetloss | TCGA     |
| MB-5070      | INPP4B | cna | hetloss | METABRIC |
| MB-5465      | INPP4B | cna | hetloss | METABRIC |
| MB-7048      | INPP4B | cna | hetloss | METABRIC |
| MB-0420      | INPP4B | cna | hetloss | METABRIC |
| PD10014      | INPP4B | cna | hetloss | BASIS    |
| PD11742      | INPP4B | cna | hetloss | BASIS    |
| PD13296      | INPP4B | cna | hetloss | BASIS    |
| PD13297      | INPP4B | cna | hetloss | BASIS    |
| PD22355      | INPP4B | cna | hetloss | BASIS    |
| PD23562      | INPP4B | cna | gain    | BASIS    |
| PD23574      | INPP4B | cna | gain    | BASIS    |
| PD23578      | INPP4B | cna | hetloss | BASIS    |
| PD24202      | INPP4B | cna | hetloss | BASIS    |
| PD24206      | INPP4B | cna | gain    | BASIS    |
| PD3905       | INPP4B | cna | gain    | BASIS    |
| PD4005       | INPP4B | cna | hetloss | BASIS    |
| PD4006       | INPP4B | cna | hetloss | BASIS    |
| PD4107       | INPP4B | cna | hetloss | BASIS    |
| PD4826       | INPP4B | cna | gain    | BASIS    |
| PD5930       | INPP4B | cna | gain    | BASIS    |
| PD5945       | INPP4B | cna | gain    | BASIS    |
| PD5948       | INPP4B | cna | hetloss | BASIS    |
| PD6406       | INPP4B | cna | hetloss | BASIS    |
| PD6731       | INPP4B | cna | hetloss | BASIS    |
| PD7215       | INPP4B | cna | amp     | BASIS    |
| PD8980       | INPP4B | cna | hetloss | BASIS    |
| TCGA-A2-A25B | IRS2   | cna | hetloss | TCGA     |
| TCGA-AN-A0XU | IRS2   | cna | hetloss | TCGA     |
| TCGA-AO-A0JL | IRS2   | cna | hetloss | TCGA     |
| TCGA-BH-A0C0 | IRS2   | cna | hetloss | TCGA     |
| TCGA-BH-A1FU | IRS2   | cna | hetloss | TCGA     |
| TCGA-C8-A12L | IRS2   | cna | gain    | TCGA     |
| TCGA-D8-A27M | IRS2   | cna | gain    | TCGA     |
| TCGA-LL-A5YP | IRS2   | cna | hetloss | TCGA     |
| MB-0346      | IRS2   | cna | hetloss | METABRIC |
| MB-5107      | IRS2   | cna | hetloss | METABRIC |
| MB-5465      | IRS2   | cna | gain    | METABRIC |
| MB-6060      | IRS2   | cna | hetloss | METABRIC |
| MB-0420      | IRS2   | cna | amp     | METABRIC |
| PD10014      | IRS2   | cna | hetloss | BASIS    |
| PD11327      | IRS2   | cna | amp     | BASIS    |

|              |      |     |         |          |
|--------------|------|-----|---------|----------|
| PD13299      | IRS2 | cna | gain    | BASIS    |
| PD14442      | IRS2 | cna | hetloss | BASIS    |
| PD22355      | IRS2 | cna | gain    | BASIS    |
| PD23562      | IRS2 | cna | gain    | BASIS    |
| PD23574      | IRS2 | cna | gain    | BASIS    |
| PD23578      | IRS2 | cna | gain    | BASIS    |
| PD24186      | IRS2 | cna | gain    | BASIS    |
| PD24202      | IRS2 | cna | gain    | BASIS    |
| PD24206      | IRS2 | cna | gain    | BASIS    |
| PD24337      | IRS2 | cna | hetloss | BASIS    |
| PD3905       | IRS2 | cna | amp     | BASIS    |
| PD4006       | IRS2 | cna | hetloss | BASIS    |
| PD4107       | IRS2 | cna | hetloss | BASIS    |
| PD4967       | IRS2 | cna | hetloss | BASIS    |
| PD5945       | IRS2 | cna | amp     | BASIS    |
| PD6731       | IRS2 | cna | hetloss | BASIS    |
| PD7215       | IRS2 | cna | gain    | BASIS    |
| PD8621       | IRS2 | cna | amp     | BASIS    |
| PD8980       | IRS2 | cna | hetloss | BASIS    |
| PD9585       | IRS2 | cna | gain    | BASIS    |
| PD9702       | IRS2 | cna | gain    | BASIS    |
| TCGA-A2-A25B | JUN  | cna | gain    | TCGA     |
| TCGA-AN-A0XU | JUN  | cna | gain    | TCGA     |
| TCGA-AO-A0JL | JUN  | cna | hetloss | TCGA     |
| TCGA-BH-A0AW | JUN  | cna | gain    | TCGA     |
| TCGA-BH-A0C0 | JUN  | cna | hetloss | TCGA     |
| TCGA-BH-A1FU | JUN  | cna | gain    | TCGA     |
| TCGA-D8-A27M | JUN  | cna | gain    | TCGA     |
| TCGA-E2-A1L7 | JUN  | cna | amp     | TCGA     |
| TCGA-LL-A5YP | JUN  | cna | hetloss | TCGA     |
| MB-0346      | JUN  | cna | hetloss | METABRIC |
| MB-6060      | JUN  | cna | amp     | METABRIC |
| MB-6098      | JUN  | cna | hetloss | METABRIC |
| MB-7038      | JUN  | cna | gain    | METABRIC |
| MB-0420      | JUN  | cna | hetloss | METABRIC |
| PD11327      | JUN  | cna | gain    | BASIS    |
| PD11742      | JUN  | cna | hetloss | BASIS    |
| PD13296      | JUN  | cna | gain    | BASIS    |
| PD13299      | JUN  | cna | gain    | BASIS    |
| PD22355      | JUN  | cna | hetloss | BASIS    |
| PD23574      | JUN  | cna | gain    | BASIS    |
| PD24186      | JUN  | cna | amp     | BASIS    |
| PD24206      | JUN  | cna | gain    | BASIS    |
| PD3890       | JUN  | cna | gain    | BASIS    |
| PD3905       | JUN  | cna | gain    | BASIS    |
| PD4006       | JUN  | cna | gain    | BASIS    |
| PD4107       | JUN  | cna | gain    | BASIS    |



|              |       |     |         |          |
|--------------|-------|-----|---------|----------|
| PD4826       | JUN   | cna | gain    | BASIS    |
| PD5930       | JUN   | cna | gain    | BASIS    |
| PD5935       | JUN   | cna | gain    | BASIS    |
| PD5945       | JUN   | cna | gain    | BASIS    |
| PD5948       | JUN   | cna | gain    | BASIS    |
| PD7067       | JUN   | cna | gain    | BASIS    |
| PD7215       | JUN   | cna | gain    | BASIS    |
| PD8621       | JUN   | cna | gain    | BASIS    |
| PD9004       | JUN   | cna | gain    | BASIS    |
| PD9702       | JUN   | cna | gain    | BASIS    |
| TCGA-A2-A25B | KDM4C | cna | hetloss | TCGA     |
| TCGA-AO-A0JL | KDM4C | cna | gain    | TCGA     |
| TCGA-BH-A0AW | KDM4C | cna | hetloss | TCGA     |
| TCGA-BH-A1FU | KDM4C | cna | hetloss | TCGA     |
| TCGA-C8-A12L | KDM4C | cna | gain    | TCGA     |
| TCGA-E2-A1L7 | KDM4C | cna | hetloss | TCGA     |
| TCGA-E9-A1NC | KDM4C | cna | amp     | TCGA     |
| MB-0346      | KDM4C | cna | gain    | METABRIC |
| MB-2827      | KDM4C | cna | hetloss | METABRIC |
| MB-6060      | KDM4C | cna | gain    | METABRIC |
| MB-0420      | KDM4C | cna | hetloss | METABRIC |
| MTS-T0064    | KDM4C | cna | amp     | METABRIC |
| PD11327      | KDM4C | cna | homdel  | BASIS    |
| PD13296      | KDM4C | cna | gain    | BASIS    |
| PD13297      | KDM4C | cna | hetloss | BASIS    |
| PD13299      | KDM4C | cna | amp     | BASIS    |
| PD22355      | KDM4C | cna | gain    | BASIS    |
| PD23574      | KDM4C | cna | amp     | BASIS    |
| PD24186      | KDM4C | cna | gain    | BASIS    |
| PD24337      | KDM4C | cna | gain    | BASIS    |
| PD3905       | KDM4C | cna | gain    | BASIS    |
| PD4006       | KDM4C | cna | gain    | BASIS    |
| PD4107       | KDM4C | cna | gain    | BASIS    |
| PD4826       | KDM4C | cna | gain    | BASIS    |
| PD5945       | KDM4C | cna | gain    | BASIS    |
| PD5948       | KDM4C | cna | hetloss | BASIS    |
| PD6406       | KDM4C | cna | homdel  | BASIS    |
| PD6413       | KDM4C | cna | gain    | BASIS    |
| PD6731       | KDM4C | cna | gain    | BASIS    |
| PD7067       | KDM4C | cna | amp     | BASIS    |
| PD7215       | KDM4C | cna | hetloss | BASIS    |
| PD8621       | KDM4C | cna | gain    | BASIS    |
| PD8980       | KDM4C | cna | gain    | BASIS    |
| PD9004       | KDM4C | cna | gain    | BASIS    |
| PD9585       | KDM4C | cna | hetloss | BASIS    |
| PD9702       | KDM4C | cna | gain    | BASIS    |
| TCGA-A2-A25B | KMT2D | cna | gain    | TCGA     |

|              |       |     |         |          |
|--------------|-------|-----|---------|----------|
| TCGA-AN-A0XU | KMT2D | cna | gain    | TCGA     |
| TCGA-AO-A0JL | KMT2D | cna | hetloss | TCGA     |
| TCGA-BH-A18R | KMT2D | cna | gain    | TCGA     |
| TCGA-BH-A1FU | KMT2D | cna | hetloss | TCGA     |
| TCGA-C8-A12L | KMT2D | cna | gain    | TCGA     |
| TCGA-D8-A27M | KMT2D | cna | hetloss | TCGA     |
| TCGA-E2-A1L7 | KMT2D | cna | hetloss | TCGA     |
| TCGA-E9-A1NC | KMT2D | cna | hetloss | TCGA     |
| TCGA-LL-A5YP | KMT2D | cna | hetloss | TCGA     |
| MB-0346      | KMT2D | cna | gain    | METABRIC |
| MB-2827      | KMT2D | cna | hetloss | METABRIC |
| MB-5070      | KMT2D | cna | hetloss | METABRIC |
| MB-6060      | KMT2D | cna | gain    | METABRIC |
| MB-6098      | KMT2D | cna | hetloss | METABRIC |
| MB-7038      | KMT2D | cna | hetloss | METABRIC |
| MB-7048      | KMT2D | cna | hetloss | METABRIC |
| MB-0420      | KMT2D | cna | hetloss | METABRIC |
| PD11327      | KMT2D | cna | hetloss | BASIS    |
| PD13296      | KMT2D | cna | hetloss | BASIS    |
| PD13297      | KMT2D | cna | hetloss | BASIS    |
| PD23578      | KMT2D | cna | hetloss | BASIS    |
| PD24202      | KMT2D | cna | hetloss | BASIS    |
| PD24206      | KMT2D | cna | gain    | BASIS    |
| PD24337      | KMT2D | cna | hetloss | BASIS    |
| PD3890       | KMT2D | cna | hetloss | BASIS    |
| PD3905       | KMT2D | cna | gain    | BASIS    |
| PD4107       | KMT2D | cna | hetloss | BASIS    |
| PD4826       | KMT2D | cna | gain    | BASIS    |
| PD5945       | KMT2D | cna | gain    | BASIS    |
| PD6413       | KMT2D | cna | hetloss | BASIS    |
| PD6731       | KMT2D | cna | hetloss | BASIS    |
| PD7067       | KMT2D | cna | gain    | BASIS    |
| PD8621       | KMT2D | cna | gain    | BASIS    |
| PD9585       | KMT2D | cna | hetloss | BASIS    |
| PD9702       | KMT2D | cna | gain    | BASIS    |
| TCGA-A2-A25B | LCK   | cna | hetloss | TCGA     |
| TCGA-AN-A0XU | LCK   | cna | hetloss | TCGA     |
| TCGA-AO-A0JL | LCK   | cna | hetloss | TCGA     |
| TCGA-BH-A0AW | LCK   | cna | gain    | TCGA     |
| TCGA-BH-A0C0 | LCK   | cna | hetloss | TCGA     |
| TCGA-BH-A18R | LCK   | cna | homdel  | TCGA     |
| TCGA-BH-A1FU | LCK   | cna | gain    | TCGA     |
| TCGA-C8-A12L | LCK   | cna | hetloss | TCGA     |
| TCGA-D8-A27M | LCK   | cna | gain    | TCGA     |
| TCGA-E2-A1L7 | LCK   | cna | gain    | TCGA     |
| TCGA-LL-A5YP | LCK   | cna | gain    | TCGA     |
| MB-0346      | LCK   | cna | hetloss | METABRIC |

|              |     |     |         |          |
|--------------|-----|-----|---------|----------|
| MB-2827      | LCK | cna | hetloss | METABRIC |
| MB-5070      | LCK | cna | hetloss | METABRIC |
| MB-5465      | LCK | cna | hetloss | METABRIC |
| MB-6060      | LCK | cna | hetloss | METABRIC |
| MB-6098      | LCK | cna | hetloss | METABRIC |
| MB-0420      | LCK | cna | hetloss | METABRIC |
| PD10014      | LCK | cna | gain    | BASIS    |
| PD11327      | LCK | cna | hetloss | BASIS    |
| PD11742      | LCK | cna | hetloss | BASIS    |
| PD13296      | LCK | cna | hetloss | BASIS    |
| PD24206      | LCK | cna | gain    | BASIS    |
| PD24337      | LCK | cna | hetloss | BASIS    |
| PD3890       | LCK | cna | hetloss | BASIS    |
| PD3905       | LCK | cna | gain    | BASIS    |
| PD4006       | LCK | cna | gain    | BASIS    |
| PD4826       | LCK | cna | gain    | BASIS    |
| PD5945       | LCK | cna | amp     | BASIS    |
| PD5948       | LCK | cna | gain    | BASIS    |
| PD7067       | LCK | cna | gain    | BASIS    |
| PD7215       | LCK | cna | gain    | BASIS    |
| PD8980       | LCK | cna | gain    | BASIS    |
| PD9004       | LCK | cna | hetloss | BASIS    |
| PD9585       | LCK | cna | hetloss | BASIS    |
| PD9702       | LCK | cna | gain    | BASIS    |
| TCGA-AN-A0XU | MAF | cna | gain    | TCGA     |
| TCGA-AO-A0JL | MAF | cna | gain    | TCGA     |
| TCGA-BH-A0AW | MAF | cna | hetloss | TCGA     |
| TCGA-BH-A0C0 | MAF | cna | hetloss | TCGA     |
| TCGA-C8-A12L | MAF | cna | hetloss | TCGA     |
| TCGA-D8-A27M | MAF | cna | gain    | TCGA     |
| TCGA-E2-A1L7 | MAF | cna | hetloss | TCGA     |
| TCGA-E9-A1NC | MAF | cna | hetloss | TCGA     |
| TCGA-LL-A5YP | MAF | cna | gain    | TCGA     |
| MB-0346      | MAF | cna | gain    | METABRIC |
| MB-5107      | MAF | cna | hetloss | METABRIC |
| MB-6271      | MAF | cna | hetloss | METABRIC |
| MB-7032      | MAF | cna | gain    | METABRIC |
| MB-7038      | MAF | cna | gain    | METABRIC |
| MB-7048      | MAF | cna | hetloss | METABRIC |
| MB-0420      | MAF | cna | hetloss | METABRIC |
| PD10014      | MAF | cna | hetloss | BASIS    |
| PD11327      | MAF | cna | gain    | BASIS    |
| PD11742      | MAF | cna | hetloss | BASIS    |
| PD13297      | MAF | cna | hetloss | BASIS    |
| PD13299      | MAF | cna | gain    | BASIS    |
| PD14442      | MAF | cna | hetloss | BASIS    |
| PD23562      | MAF | cna | gain    | BASIS    |

|              |      |     |         |          |
|--------------|------|-----|---------|----------|
| PD24202      | MAF  | cna | hetloss | BASIS    |
| PD24337      | MAF  | cna | hetloss | BASIS    |
| PD3890       | MAF  | cna | gain    | BASIS    |
| PD3905       | MAF  | cna | gain    | BASIS    |
| PD4005       | MAF  | cna | hetloss | BASIS    |
| PD4006       | MAF  | cna | hetloss | BASIS    |
| PD4107       | MAF  | cna | gain    | BASIS    |
| PD4967       | MAF  | cna | hetloss | BASIS    |
| PD5945       | MAF  | cna | amp     | BASIS    |
| PD5948       | MAF  | cna | gain    | BASIS    |
| PD7215       | MAF  | cna | gain    | BASIS    |
| PD9585       | MAF  | cna | hetloss | BASIS    |
| PD9702       | MAF  | cna | gain    | BASIS    |
| TCGA-A2-A25B | MDS2 | cna | hetloss | TCGA     |
| TCGA-AN-A0XU | MDS2 | cna | hetloss | TCGA     |
| TCGA-AO-A0JL | MDS2 | cna | hetloss | TCGA     |
| TCGA-BH-A0AW | MDS2 | cna | gain    | TCGA     |
| TCGA-BH-A0C0 | MDS2 | cna | hetloss | TCGA     |
| TCGA-BH-A18R | MDS2 | cna | homdel  | TCGA     |
| TCGA-BH-A1FU | MDS2 | cna | gain    | TCGA     |
| TCGA-C8-A12L | MDS2 | cna | hetloss | TCGA     |
| TCGA-D8-A27M | MDS2 | cna | gain    | TCGA     |
| TCGA-E2-A1L7 | MDS2 | cna | hetloss | TCGA     |
| TCGA-E9-A1NC | MDS2 | cna | hetloss | TCGA     |
| TCGA-LL-A5YP | MDS2 | cna | hetloss | TCGA     |
| MB-2827      | MDS2 | cna | hetloss | METABRIC |
| MB-5070      | MDS2 | cna | hetloss | METABRIC |
| MB-5465      | MDS2 | cna | hetloss | METABRIC |
| MB-6060      | MDS2 | cna | hetloss | METABRIC |
| MB-6098      | MDS2 | cna | hetloss | METABRIC |
| MB-6271      | MDS2 | cna | hetloss | METABRIC |
| MB-0420      | MDS2 | cna | hetloss | METABRIC |
| PD10014      | MDS2 | cna | gain    | BASIS    |
| PD11742      | MDS2 | cna | hetloss | BASIS    |
| PD13296      | MDS2 | cna | hetloss | BASIS    |
| PD13771      | MDS2 | cna | hetloss | BASIS    |
| PD22355      | MDS2 | cna | hetloss | BASIS    |
| PD24186      | MDS2 | cna | gain    | BASIS    |
| PD24206      | MDS2 | cna | hetloss | BASIS    |
| PD24337      | MDS2 | cna | hetloss | BASIS    |
| PD3890       | MDS2 | cna | hetloss | BASIS    |
| PD3905       | MDS2 | cna | gain    | BASIS    |
| PD4006       | MDS2 | cna | gain    | BASIS    |
| PD4826       | MDS2 | cna | gain    | BASIS    |
| PD5945       | MDS2 | cna | amp     | BASIS    |
| PD7067       | MDS2 | cna | gain    | BASIS    |
| PD7215       | MDS2 | cna | gain    | BASIS    |

|              |         |     |         |          |
|--------------|---------|-----|---------|----------|
| PD9004       | MDS2    | cna | hetloss | BASIS    |
| PD9585       | MDS2    | cna | hetloss | BASIS    |
| TCGA-A2-A25B | MIR17HG | cna | hetloss | TCGA     |
| TCGA-AN-A0XU | MIR17HG | cna | hetloss | TCGA     |
| TCGA-AO-A0JL | MIR17HG | cna | hetloss | TCGA     |
| TCGA-BH-A0AW | MIR17HG | cna | amp     | TCGA     |
| TCGA-BH-A0C0 | MIR17HG | cna | hetloss | TCGA     |
| TCGA-BH-A1FU | MIR17HG | cna | hetloss | TCGA     |
| TCGA-C8-A12L | MIR17HG | cna | gain    | TCGA     |
| TCGA-LL-A5YP | MIR17HG | cna | hetloss | TCGA     |
| MB-0346      | MIR17HG | cna | hetloss | METABRIC |
| MB-5070      | MIR17HG | cna | hetloss | METABRIC |
| MB-6060      | MIR17HG | cna | hetloss | METABRIC |
| MB-6098      | MIR17HG | cna | gain    | METABRIC |
| MB-0420      | MIR17HG | cna | amp     | METABRIC |
| PD10014      | MIR17HG | cna | hetloss | BASIS    |
| PD11327      | MIR17HG | cna | gain    | BASIS    |
| PD13296      | MIR17HG | cna | hetloss | BASIS    |
| PD13299      | MIR17HG | cna | gain    | BASIS    |
| PD14442      | MIR17HG | cna | hetloss | BASIS    |
| PD23562      | MIR17HG | cna | gain    | BASIS    |
| PD23578      | MIR17HG | cna | gain    | BASIS    |
| PD24202      | MIR17HG | cna | hetloss | BASIS    |
| PD24206      | MIR17HG | cna | gain    | BASIS    |
| PD24337      | MIR17HG | cna | hetloss | BASIS    |
| PD3905       | MIR17HG | cna | amp     | BASIS    |
| PD4005       | MIR17HG | cna | hetloss | BASIS    |
| PD4006       | MIR17HG | cna | hetloss | BASIS    |
| PD4107       | MIR17HG | cna | hetloss | BASIS    |
| PD5945       | MIR17HG | cna | amp     | BASIS    |
| PD5948       | MIR17HG | cna | hetloss | BASIS    |
| PD6731       | MIR17HG | cna | hetloss | BASIS    |
| PD7067       | MIR17HG | cna | gain    | BASIS    |
| PD7215       | MIR17HG | cna | gain    | BASIS    |
| PD8621       | MIR17HG | cna | amp     | BASIS    |
| PD8980       | MIR17HG | cna | hetloss | BASIS    |
| PD9585       | MIR17HG | cna | gain    | BASIS    |
| PD9702       | MIR17HG | cna | gain    | BASIS    |
| TCGA-A2-A25B | MKL1    | cna | hetloss | TCGA     |
| TCGA-AN-A0XU | MKL1    | cna | hetloss | TCGA     |
| TCGA-BH-A0AW | MKL1    | cna | hetloss | TCGA     |
| TCGA-BH-A1FU | MKL1    | cna | gain    | TCGA     |
| TCGA-C8-A12L | MKL1    | cna | gain    | TCGA     |
| TCGA-D8-A27M | MKL1    | cna | gain    | TCGA     |
| TCGA-E9-A1NC | MKL1    | cna | gain    | TCGA     |
| MB-2827      | MKL1    | cna | hetloss | METABRIC |
| MB-5465      | MKL1    | cna | gain    | METABRIC |

|              |        |     |         |          |
|--------------|--------|-----|---------|----------|
| MB-6098      | MKL1   | cna | gain    | METABRIC |
| MTS-T0064    | MKL1   | cna | gain    | METABRIC |
| PD11327      | MKL1   | cna | gain    | BASIS    |
| PD11742      | MKL1   | cna | hetloss | BASIS    |
| PD13296      | MKL1   | cna | gain    | BASIS    |
| PD13297      | MKL1   | cna | hetloss | BASIS    |
| PD13299      | MKL1   | cna | gain    | BASIS    |
| PD14442      | MKL1   | cna | hetloss | BASIS    |
| PD22355      | MKL1   | cna | gain    | BASIS    |
| PD23562      | MKL1   | cna | gain    | BASIS    |
| PD23578      | MKL1   | cna | gain    | BASIS    |
| PD24206      | MKL1   | cna | homdel  | BASIS    |
| PD3905       | MKL1   | cna | gain    | BASIS    |
| PD4005       | MKL1   | cna | gain    | BASIS    |
| PD4006       | MKL1   | cna | gain    | BASIS    |
| PD4107       | MKL1   | cna | gain    | BASIS    |
| PD4826       | MKL1   | cna | gain    | BASIS    |
| PD4967       | MKL1   | cna | hetloss | BASIS    |
| PD5935       | MKL1   | cna | gain    | BASIS    |
| PD5945       | MKL1   | cna | amp     | BASIS    |
| PD5948       | MKL1   | cna | gain    | BASIS    |
| PD6731       | MKL1   | cna | hetloss | BASIS    |
| PD7067       | MKL1   | cna | gain    | BASIS    |
| PD7215       | MKL1   | cna | gain    | BASIS    |
| PD8621       | MKL1   | cna | gain    | BASIS    |
| PD9004       | MKL1   | cna | gain    | BASIS    |
| PD9702       | MKL1   | cna | gain    | BASIS    |
| TCGA-A2-A25B | MLLT10 | cna | gain    | TCGA     |
| TCGA-AN-A0XU | MLLT10 | cna | amp     | TCGA     |
| TCGA-AO-A0JL | MLLT10 | cna | gain    | TCGA     |
| TCGA-BH-A0AW | MLLT10 | cna | gain    | TCGA     |
| TCGA-BH-A0C0 | MLLT10 | cna | gain    | TCGA     |
| TCGA-C8-A12L | MLLT10 | cna | gain    | TCGA     |
| TCGA-LL-A5YP | MLLT10 | cna | gain    | TCGA     |
| MB-6098      | MLLT10 | cna | gain    | METABRIC |
| MB-7038      | MLLT10 | cna | hetloss | METABRIC |
| MTS-T0064    | MLLT10 | cna | gain    | METABRIC |
| PD10014      | MLLT10 | cna | amp     | BASIS    |
| PD11327      | MLLT10 | cna | amp     | BASIS    |
| PD13296      | MLLT10 | cna | gain    | BASIS    |
| PD13299      | MLLT10 | cna | gain    | BASIS    |
| PD13771      | MLLT10 | cna | gain    | BASIS    |
| PD22355      | MLLT10 | cna | gain    | BASIS    |
| PD23562      | MLLT10 | cna | amp     | BASIS    |
| PD23574      | MLLT10 | cna | gain    | BASIS    |
| PD24186      | MLLT10 | cna | gain    | BASIS    |
| PD24202      | MLLT10 | cna | hetloss | BASIS    |

|              |        |     |         |          |
|--------------|--------|-----|---------|----------|
| PD3890       | MLLT10 | cna | hetloss | BASIS    |
| PD3905       | MLLT10 | cna | gain    | BASIS    |
| PD4005       | MLLT10 | cna | gain    | BASIS    |
| PD4006       | MLLT10 | cna | gain    | BASIS    |
| PD4107       | MLLT10 | cna | gain    | BASIS    |
| PD5930       | MLLT10 | cna | gain    | BASIS    |
| PD5945       | MLLT10 | cna | amp     | BASIS    |
| PD5948       | MLLT10 | cna | gain    | BASIS    |
| PD6406       | MLLT10 | cna | hetloss | BASIS    |
| PD6413       | MLLT10 | cna | gain    | BASIS    |
| PD7067       | MLLT10 | cna | gain    | BASIS    |
| PD7215       | MLLT10 | cna | gain    | BASIS    |
| PD8621       | MLLT10 | cna | gain    | BASIS    |
| PD8980       | MLLT10 | cna | gain    | BASIS    |
| PD9004       | MLLT10 | cna | gain    | BASIS    |
| PD9702       | MLLT10 | cna | gain    | BASIS    |
| TCGA-A2-A25B | MSN    | cna | gain    | TCGA     |
| TCGA-AN-A0XU | MSN    | cna | hetloss | TCGA     |
| TCGA-AO-A0JL | MSN    | cna | gain    | TCGA     |
| TCGA-BH-A0AW | MSN    | cna | gain    | TCGA     |
| TCGA-E2-A1L7 | MSN    | cna | hetloss | TCGA     |
| TCGA-E9-A1NC | MSN    | cna | hetloss | TCGA     |
| MB-0346      | MSN    | cna | amp     | METABRIC |
| MB-5465      | MSN    | cna | gain    | METABRIC |
| MB-6060      | MSN    | cna | hetloss | METABRIC |
| MB-6098      | MSN    | cna | hetloss | METABRIC |
| MB-0420      | MSN    | cna | hetloss | METABRIC |
| PD10014      | MSN    | cna | hetloss | BASIS    |
| PD11327      | MSN    | cna | hetloss | BASIS    |
| PD13296      | MSN    | cna | amp     | BASIS    |
| PD13299      | MSN    | cna | gain    | BASIS    |
| PD13771      | MSN    | cna | gain    | BASIS    |
| PD14442      | MSN    | cna | gain    | BASIS    |
| PD23562      | MSN    | cna | hetloss | BASIS    |
| PD23574      | MSN    | cna | gain    | BASIS    |
| PD24206      | MSN    | cna | amp     | BASIS    |
| PD3890       | MSN    | cna | gain    | BASIS    |
| PD3905       | MSN    | cna | gain    | BASIS    |
| PD4005       | MSN    | cna | hetloss | BASIS    |
| PD4107       | MSN    | cna | gain    | BASIS    |
| PD4826       | MSN    | cna | gain    | BASIS    |
| PD4967       | MSN    | cna | gain    | BASIS    |
| PD5930       | MSN    | cna | gain    | BASIS    |
| PD5935       | MSN    | cna | gain    | BASIS    |
| PD5945       | MSN    | cna | gain    | BASIS    |
| PD5948       | MSN    | cna | gain    | BASIS    |
| PD6406       | MSN    | cna | gain    | BASIS    |

|                   |      |     |         |            |
|-------------------|------|-----|---------|------------|
| PD7067            | MSN  | cna | gain    | BASIS      |
| PD7215            | MSN  | cna | gain    | BASIS      |
| PD8621            | MSN  | cna | gain    | BASIS      |
| PD8980            | MSN  | cna | gain    | BASIS      |
| PD9004            | MSN  | cna | gain    | BASIS      |
| TCGA-A2-A25B      | MTOR | cna | hetloss | TCGA       |
| TCGA-AN-A0XU      | MTOR | cna | hetloss | TCGA       |
| TCGA-AO-A0JL      | MTOR | cna | hetloss | TCGA       |
| TCGA-BH-A0AW      | MTOR | cna | gain    | TCGA       |
| TCGA-BH-A0C0      | MTOR | cna | hetloss | TCGA       |
| TCGA-BH-A18R      | MTOR | cna | homdel  | TCGA       |
| TCGA-BH-A1FU      | MTOR | cna | gain    | TCGA       |
| TCGA-C8-A12L      | MTOR | cna | hetloss | TCGA       |
| TCGA-D8-A27M      | MTOR | cna | gain    | TCGA       |
| TCGA-E2-A1L7      | MTOR | cna | hetloss | TCGA       |
| TCGA-E9-A1NC      | MTOR | cna | hetloss | TCGA       |
| TCGA-LL-A5YP      | MTOR | cna | amp     | TCGA       |
| MB-2827           | MTOR | cna | hetloss | METABRIC   |
| MB-5070           | MTOR | cna | hetloss | METABRIC   |
| MB-5465           | MTOR | cna | hetloss | METABRIC   |
| MB-6060           | MTOR | cna | hetloss | METABRIC   |
| MB-6098           | MTOR | cna | hetloss | METABRIC   |
| MB-0420           | MTOR | cna | hetloss | METABRIC   |
| P-0010758-T01-IM5 | MTOR | cna | homdel  | MSK-IMPACT |
| PD10014           | MTOR | cna | gain    | BASIS      |
| PD11742           | MTOR | cna | hetloss | BASIS      |
| PD13296           | MTOR | cna | hetloss | BASIS      |
| PD22355           | MTOR | cna | hetloss | BASIS      |
| PD24202           | MTOR | cna | hetloss | BASIS      |
| PD24206           | MTOR | cna | gain    | BASIS      |
| PD24337           | MTOR | cna | hetloss | BASIS      |
| PD3890            | MTOR | cna | hetloss | BASIS      |
| PD3905            | MTOR | cna | gain    | BASIS      |
| PD4107            | MTOR | cna | hetloss | BASIS      |
| PD4826            | MTOR | cna | gain    | BASIS      |
| PD5945            | MTOR | cna | gain    | BASIS      |
| PD6406            | MTOR | cna | hetloss | BASIS      |
| PD7067            | MTOR | cna | gain    | BASIS      |
| PD7215            | MTOR | cna | gain    | BASIS      |
| PD8980            | MTOR | cna | hetloss | BASIS      |
| PD9004            | MTOR | cna | hetloss | BASIS      |
| TCGA-A2-A25B      | MYH9 | cna | hetloss | TCGA       |
| TCGA-AO-A0JL      | MYH9 | cna | hetloss | TCGA       |
| TCGA-BH-A0AW      | MYH9 | cna | hetloss | TCGA       |
| TCGA-BH-A1FU      | MYH9 | cna | gain    | TCGA       |
| TCGA-C8-A12L      | MYH9 | cna | gain    | TCGA       |
| TCGA-D8-A27M      | MYH9 | cna | gain    | TCGA       |



|              |        |     |         |          |
|--------------|--------|-----|---------|----------|
| TCGA-E9-A1NC | MYH9   | cna | gain    | TCGA     |
| TCGA-LL-A5YP | MYH9   | cna | gain    | TCGA     |
| MB-0346      | MYH9   | cna | gain    | METABRIC |
| MB-5465      | MYH9   | cna | gain    | METABRIC |
| MB-6098      | MYH9   | cna | gain    | METABRIC |
| PD11742      | MYH9   | cna | hetloss | BASIS    |
| PD13296      | MYH9   | cna | gain    | BASIS    |
| PD13297      | MYH9   | cna | gain    | BASIS    |
| PD13299      | MYH9   | cna | gain    | BASIS    |
| PD14442      | MYH9   | cna | hetloss | BASIS    |
| PD22355      | MYH9   | cna | gain    | BASIS    |
| PD23562      | MYH9   | cna | gain    | BASIS    |
| PD23574      | MYH9   | cna | gain    | BASIS    |
| PD23578      | MYH9   | cna | gain    | BASIS    |
| PD24206      | MYH9   | cna | hetloss | BASIS    |
| PD3905       | MYH9   | cna | gain    | BASIS    |
| PD4006       | MYH9   | cna | gain    | BASIS    |
| PD4107       | MYH9   | cna | gain    | BASIS    |
| PD4826       | MYH9   | cna | gain    | BASIS    |
| PD4967       | MYH9   | cna | hetloss | BASIS    |
| PD5935       | MYH9   | cna | gain    | BASIS    |
| PD5945       | MYH9   | cna | amp     | BASIS    |
| PD5948       | MYH9   | cna | gain    | BASIS    |
| PD6406       | MYH9   | cna | gain    | BASIS    |
| PD6731       | MYH9   | cna | hetloss | BASIS    |
| PD7067       | MYH9   | cna | gain    | BASIS    |
| PD7215       | MYH9   | cna | gain    | BASIS    |
| PD8621       | MYH9   | cna | gain    | BASIS    |
| PD9004       | MYH9   | cna | gain    | BASIS    |
| PD9702       | MYH9   | cna | gain    | BASIS    |
| TCGA-A2-A25B | MYO18A | cna | amp     | TCGA     |
| TCGA-AN-A0XU | MYO18A | cna | gain    | TCGA     |
| TCGA-AO-A0JL | MYO18A | cna | gain    | TCGA     |
| TCGA-BH-A0AW | MYO18A | cna | amp     | TCGA     |
| TCGA-BH-A0C0 | MYO18A | cna | gain    | TCGA     |
| TCGA-BH-A18R | MYO18A | cna | gain    | TCGA     |
| TCGA-C8-A12L | MYO18A | cna | gain    | TCGA     |
| TCGA-D8-A27M | MYO18A | cna | hetloss | TCGA     |
| TCGA-E2-A1L7 | MYO18A | cna | hetloss | TCGA     |
| TCGA-E9-A1NC | MYO18A | cna | hetloss | TCGA     |
| TCGA-LL-A5YP | MYO18A | cna | hetloss | TCGA     |
| MB-0346      | MYO18A | cna | hetloss | METABRIC |
| MB-2827      | MYO18A | cna | homdel  | METABRIC |
| MB-5070      | MYO18A | cna | gain    | METABRIC |
| MB-5465      | MYO18A | cna | hetloss | METABRIC |
| MB-6060      | MYO18A | cna | gain    | METABRIC |
| MB-6098      | MYO18A | cna | hetloss | METABRIC |

|              |        |     |         |          |
|--------------|--------|-----|---------|----------|
| MB-6271      | MYO18A | cna | hetloss | METABRIC |
| MB-0420      | MYO18A | cna | hetloss | METABRIC |
| PD11742      | MYO18A | cna | hetloss | BASIS    |
| PD13297      | MYO18A | cna | hetloss | BASIS    |
| PD22355      | MYO18A | cna | hetloss | BASIS    |
| PD23561      | MYO18A | cna | gain    | BASIS    |
| PD23562      | MYO18A | cna | gain    | BASIS    |
| PD24337      | MYO18A | cna | hetloss | BASIS    |
| PD4005       | MYO18A | cna | hetloss | BASIS    |
| PD4967       | MYO18A | cna | hetloss | BASIS    |
| PD5945       | MYO18A | cna | gain    | BASIS    |
| PD6406       | MYO18A | cna | hetloss | BASIS    |
| PD6413       | MYO18A | cna | hetloss | BASIS    |
| PD6731       | MYO18A | cna | hetloss | BASIS    |
| PD7067       | MYO18A | cna | gain    | BASIS    |
| PD7215       | MYO18A | cna | gain    | BASIS    |
| PD9004       | MYO18A | cna | hetloss | BASIS    |
| PD9585       | MYO18A | cna | hetloss | BASIS    |
| PD9702       | MYO18A | cna | gain    | BASIS    |
| TCGA-A2-A25B | NCOA3  | cna | gain    | TCGA     |
| TCGA-AO-A0JL | NCOA3  | cna | gain    | TCGA     |
| TCGA-BH-A0AW | NCOA3  | cna | gain    | TCGA     |
| TCGA-BH-A0C0 | NCOA3  | cna | gain    | TCGA     |
| TCGA-C8-A12L | NCOA3  | cna | gain    | TCGA     |
| TCGA-D8-A27M | NCOA3  | cna | hetloss | TCGA     |
| TCGA-E2-A1L7 | NCOA3  | cna | gain    | TCGA     |
| TCGA-E9-A1NC | NCOA3  | cna | hetloss | TCGA     |
| TCGA-LL-A5YP | NCOA3  | cna | hetloss | TCGA     |
| MB-0346      | NCOA3  | cna | gain    | METABRIC |
| MB-5070      | NCOA3  | cna | hetloss | METABRIC |
| MB-5107      | NCOA3  | cna | gain    | METABRIC |
| MB-6060      | NCOA3  | cna | gain    | METABRIC |
| MB-6098      | NCOA3  | cna | hetloss | METABRIC |
| PD11327      | NCOA3  | cna | homdel  | BASIS    |
| PD13297      | NCOA3  | cna | hetloss | BASIS    |
| PD13299      | NCOA3  | cna | gain    | BASIS    |
| PD13771      | NCOA3  | cna | gain    | BASIS    |
| PD22355      | NCOA3  | cna | hetloss | BASIS    |
| PD23562      | NCOA3  | cna | gain    | BASIS    |
| PD24186      | NCOA3  | cna | gain    | BASIS    |
| PD24202      | NCOA3  | cna | hetloss | BASIS    |
| PD3905       | NCOA3  | cna | gain    | BASIS    |
| PD4005       | NCOA3  | cna | hetloss | BASIS    |
| PD4006       | NCOA3  | cna | gain    | BASIS    |
| PD4826       | NCOA3  | cna | gain    | BASIS    |
| PD5935       | NCOA3  | cna | gain    | BASIS    |
| PD5945       | NCOA3  | cna | amp     | BASIS    |

|              |       |     |         |          |
|--------------|-------|-----|---------|----------|
| PD5948       | NCOA3 | cna | gain    | BASIS    |
| PD6406       | NCOA3 | cna | gain    | BASIS    |
| PD6731       | NCOA3 | cna | hetloss | BASIS    |
| PD7067       | NCOA3 | cna | gain    | BASIS    |
| PD7215       | NCOA3 | cna | amp     | BASIS    |
| PD8980       | NCOA3 | cna | gain    | BASIS    |
| PD9004       | NCOA3 | cna | gain    | BASIS    |
| PD9585       | NCOA3 | cna | hetloss | BASIS    |
| TCGA-A2-A25B | NFIB  | cna | hetloss | TCGA     |
| TCGA-AO-A0JL | NFIB  | cna | gain    | TCGA     |
| TCGA-BH-A0AW | NFIB  | cna | hetloss | TCGA     |
| TCGA-BH-A1FU | NFIB  | cna | hetloss | TCGA     |
| TCGA-C8-A12L | NFIB  | cna | gain    | TCGA     |
| TCGA-E2-A1L7 | NFIB  | cna | hetloss | TCGA     |
| TCGA-E9-A1NC | NFIB  | cna | amp     | TCGA     |
| MB-0346      | NFIB  | cna | hetloss | METABRIC |
| MB-5070      | NFIB  | cna | hetloss | METABRIC |
| MB-5465      | NFIB  | cna | gain    | METABRIC |
| MB-6098      | NFIB  | cna | hetloss | METABRIC |
| MB-0420      | NFIB  | cna | hetloss | METABRIC |
| MTS-T0064    | NFIB  | cna | amp     | METABRIC |
| PD11327      | NFIB  | cna | hetloss | BASIS    |
| PD13296      | NFIB  | cna | gain    | BASIS    |
| PD13297      | NFIB  | cna | hetloss | BASIS    |
| PD13299      | NFIB  | cna | amp     | BASIS    |
| PD22355      | NFIB  | cna | gain    | BASIS    |
| PD23574      | NFIB  | cna | amp     | BASIS    |
| PD24186      | NFIB  | cna | gain    | BASIS    |
| PD24202      | NFIB  | cna | hetloss | BASIS    |
| PD24337      | NFIB  | cna | gain    | BASIS    |
| PD3905       | NFIB  | cna | amp     | BASIS    |
| PD4005       | NFIB  | cna | homdel  | BASIS    |
| PD4006       | NFIB  | cna | gain    | BASIS    |
| PD4107       | NFIB  | cna | gain    | BASIS    |
| PD4826       | NFIB  | cna | gain    | BASIS    |
| PD5945       | NFIB  | cna | amp     | BASIS    |
| PD6406       | NFIB  | cna | homdel  | BASIS    |
| PD6413       | NFIB  | cna | gain    | BASIS    |
| PD7067       | NFIB  | cna | amp     | BASIS    |
| PD8621       | NFIB  | cna | gain    | BASIS    |
| PD8980       | NFIB  | cna | hetloss | BASIS    |
| PD9004       | NFIB  | cna | gain    | BASIS    |
| PD9585       | NFIB  | cna | hetloss | BASIS    |
| PD9702       | NFIB  | cna | gain    | BASIS    |
| TCGA-AO-A0JL | PDCD1 | cna | hetloss | TCGA     |
| TCGA-BH-A0AW | PDCD1 | cna | hetloss | TCGA     |
| TCGA-C8-A12L | PDCD1 | cna | hetloss | TCGA     |

|              |       |     |         |          |
|--------------|-------|-----|---------|----------|
| TCGA-D8-A27M | PDCD1 | cna | gain    | TCGA     |
| TCGA-E2-A1L7 | PDCD1 | cna | hetloss | TCGA     |
| TCGA-E9-A1NC | PDCD1 | cna | hetloss | TCGA     |
| MB-5070      | PDCD1 | cna | hetloss | METABRIC |
| MB-5107      | PDCD1 | cna | hetloss | METABRIC |
| MB-6060      | PDCD1 | cna | hetloss | METABRIC |
| MB-6098      | PDCD1 | cna | hetloss | METABRIC |
| MB-6271      | PDCD1 | cna | hetloss | METABRIC |
| MB-7048      | PDCD1 | cna | hetloss | METABRIC |
| PD10014      | PDCD1 | cna | gain    | BASIS    |
| PD11327      | PDCD1 | cna | gain    | BASIS    |
| PD11742      | PDCD1 | cna | hetloss | BASIS    |
| PD13296      | PDCD1 | cna | homdel  | BASIS    |
| PD13297      | PDCD1 | cna | hetloss | BASIS    |
| PD23578      | PDCD1 | cna | hetloss | BASIS    |
| PD24186      | PDCD1 | cna | gain    | BASIS    |
| PD24202      | PDCD1 | cna | hetloss | BASIS    |
| PD24206      | PDCD1 | cna | gain    | BASIS    |
| PD3890       | PDCD1 | cna | hetloss | BASIS    |
| PD3905       | PDCD1 | cna | gain    | BASIS    |
| PD4005       | PDCD1 | cna | hetloss | BASIS    |
| PD4006       | PDCD1 | cna | gain    | BASIS    |
| PD4967       | PDCD1 | cna | hetloss | BASIS    |
| PD5935       | PDCD1 | cna | gain    | BASIS    |
| PD5945       | PDCD1 | cna | gain    | BASIS    |
| PD5948       | PDCD1 | cna | gain    | BASIS    |
| PD6406       | PDCD1 | cna | hetloss | BASIS    |
| PD6413       | PDCD1 | cna | hetloss | BASIS    |
| PD6731       | PDCD1 | cna | hetloss | BASIS    |
| PD7067       | PDCD1 | cna | gain    | BASIS    |
| PD7215       | PDCD1 | cna | gain    | BASIS    |
| PD8980       | PDCD1 | cna | gain    | BASIS    |
| PD9585       | PDCD1 | cna | hetloss | BASIS    |
| TCGA-A2-A25B | PER1  | cna | hetloss | TCGA     |
| TCGA-AN-A0XU | PER1  | cna | hetloss | TCGA     |
| TCGA-AO-A0JL | PER1  | cna | gain    | TCGA     |
| TCGA-BH-A0AW | PER1  | cna | hetloss | TCGA     |
| TCGA-BH-A0C0 | PER1  | cna | hetloss | TCGA     |
| TCGA-C8-A12L | PER1  | cna | hetloss | TCGA     |
| TCGA-D8-A27M | PER1  | cna | hetloss | TCGA     |
| TCGA-E2-A1L7 | PER1  | cna | hetloss | TCGA     |
| TCGA-E9-A1NC | PER1  | cna | hetloss | TCGA     |
| TCGA-LL-A5YP | PER1  | cna | gain    | TCGA     |
| MB-0346      | PER1  | cna | hetloss | METABRIC |
| MB-2827      | PER1  | cna | hetloss | METABRIC |
| MB-5070      | PER1  | cna | hetloss | METABRIC |
| MB-5107      | PER1  | cna | hetloss | METABRIC |

|                   |        |     |         |            |
|-------------------|--------|-----|---------|------------|
| MB-6098           | PER1   | cna | hetloss | METABRIC   |
| MB-6271           | PER1   | cna | hetloss | METABRIC   |
| MB-7048           | PER1   | cna | hetloss | METABRIC   |
| MB-0420           | PER1   | cna | hetloss | METABRIC   |
| PD11742           | PER1   | cna | hetloss | BASIS      |
| PD13296           | PER1   | cna | hetloss | BASIS      |
| PD13771           | PER1   | cna | hetloss | BASIS      |
| PD22355           | PER1   | cna | hetloss | BASIS      |
| PD24202           | PER1   | cna | hetloss | BASIS      |
| PD24206           | PER1   | cna | hetloss | BASIS      |
| PD24337           | PER1   | cna | hetloss | BASIS      |
| PD3890            | PER1   | cna | hetloss | BASIS      |
| PD3905            | PER1   | cna | gain    | BASIS      |
| PD4005            | PER1   | cna | homdel  | BASIS      |
| PD4826            | PER1   | cna | hetloss | BASIS      |
| PD4967            | PER1   | cna | hetloss | BASIS      |
| PD5945            | PER1   | cna | gain    | BASIS      |
| PD6406            | PER1   | cna | hetloss | BASIS      |
| PD6413            | PER1   | cna | hetloss | BASIS      |
| PD6731            | PER1   | cna | hetloss | BASIS      |
| PD7067            | PER1   | cna | gain    | BASIS      |
| PD9585            | PER1   | cna | hetloss | BASIS      |
| TCGA-A2-A25B      | PIK3CD | cna | hetloss | TCGA       |
| TCGA-AN-A0XU      | PIK3CD | cna | hetloss | TCGA       |
| TCGA-AO-A0JL      | PIK3CD | cna | hetloss | TCGA       |
| TCGA-BH-A0AW      | PIK3CD | cna | gain    | TCGA       |
| TCGA-BH-A0C0      | PIK3CD | cna | hetloss | TCGA       |
| TCGA-BH-A18R      | PIK3CD | cna | homdel  | TCGA       |
| TCGA-BH-A1FU      | PIK3CD | cna | gain    | TCGA       |
| TCGA-C8-A12L      | PIK3CD | cna | hetloss | TCGA       |
| TCGA-D8-A27M      | PIK3CD | cna | gain    | TCGA       |
| TCGA-E2-A1L7      | PIK3CD | cna | hetloss | TCGA       |
| TCGA-LL-A5YP      | PIK3CD | cna | amp     | TCGA       |
| MB-2827           | PIK3CD | cna | hetloss | METABRIC   |
| MB-5070           | PIK3CD | cna | hetloss | METABRIC   |
| MB-5465           | PIK3CD | cna | hetloss | METABRIC   |
| MB-6060           | PIK3CD | cna | hetloss | METABRIC   |
| MB-6098           | PIK3CD | cna | gain    | METABRIC   |
| MB-0420           | PIK3CD | cna | hetloss | METABRIC   |
| P-0010758-T01-IM5 | PIK3CD | cna | homdel  | MSK-IMPACT |
| PD10014           | PIK3CD | cna | gain    | BASIS      |
| PD11742           | PIK3CD | cna | hetloss | BASIS      |
| PD13296           | PIK3CD | cna | hetloss | BASIS      |
| PD22355           | PIK3CD | cna | hetloss | BASIS      |
| PD24202           | PIK3CD | cna | hetloss | BASIS      |
| PD24206           | PIK3CD | cna | hetloss | BASIS      |
| PD24337           | PIK3CD | cna | hetloss | BASIS      |

|              |        |     |         |          |
|--------------|--------|-----|---------|----------|
| PD3890       | PIK3CD | cna | hetloss | BASIS    |
| PD3905       | PIK3CD | cna | gain    | BASIS    |
| PD4107       | PIK3CD | cna | hetloss | BASIS    |
| PD4826       | PIK3CD | cna | gain    | BASIS    |
| PD5945       | PIK3CD | cna | gain    | BASIS    |
| PD6406       | PIK3CD | cna | hetloss | BASIS    |
| PD7067       | PIK3CD | cna | gain    | BASIS    |
| PD7215       | PIK3CD | cna | gain    | BASIS    |
| PD8621       | PIK3CD | cna | gain    | BASIS    |
| PD8980       | PIK3CD | cna | hetloss | BASIS    |
| PD9004       | PIK3CD | cna | hetloss | BASIS    |
| TCGA-A2-A25B | PIK3CG | cna | gain    | TCGA     |
| TCGA-AN-A0XU | PIK3CG | cna | hetloss | TCGA     |
| TCGA-AO-A0JL | PIK3CG | cna | gain    | TCGA     |
| TCGA-BH-A0AW | PIK3CG | cna | gain    | TCGA     |
| TCGA-C8-A12L | PIK3CG | cna | hetloss | TCGA     |
| TCGA-D8-A27M | PIK3CG | cna | gain    | TCGA     |
| TCGA-E2-A1L7 | PIK3CG | cna | hetloss | TCGA     |
| TCGA-E9-A1NC | PIK3CG | cna | gain    | TCGA     |
| TCGA-LL-A5YP | PIK3CG | cna | gain    | TCGA     |
| MB-0346      | PIK3CG | cna | hetloss | METABRIC |
| MB-5465      | PIK3CG | cna | hetloss | METABRIC |
| MB-6098      | PIK3CG | cna | hetloss | METABRIC |
| MB-7038      | PIK3CG | cna | gain    | METABRIC |
| MB-7048      | PIK3CG | cna | gain    | METABRIC |
| PD11327      | PIK3CG | cna | amp     | BASIS    |
| PD13296      | PIK3CG | cna | hetloss | BASIS    |
| PD22355      | PIK3CG | cna | hetloss | BASIS    |
| PD23574      | PIK3CG | cna | gain    | BASIS    |
| PD24186      | PIK3CG | cna | amp     | BASIS    |
| PD24337      | PIK3CG | cna | hetloss | BASIS    |
| PD3890       | PIK3CG | cna | hetloss | BASIS    |
| PD3905       | PIK3CG | cna | gain    | BASIS    |
| PD4006       | PIK3CG | cna | gain    | BASIS    |
| PD4107       | PIK3CG | cna | gain    | BASIS    |
| PD4826       | PIK3CG | cna | gain    | BASIS    |
| PD5930       | PIK3CG | cna | gain    | BASIS    |
| PD5935       | PIK3CG | cna | gain    | BASIS    |
| PD5945       | PIK3CG | cna | amp     | BASIS    |
| PD5948       | PIK3CG | cna | gain    | BASIS    |
| PD6406       | PIK3CG | cna | gain    | BASIS    |
| PD7067       | PIK3CG | cna | gain    | BASIS    |
| PD7215       | PIK3CG | cna | gain    | BASIS    |
| PD8621       | PIK3CG | cna | gain    | BASIS    |
| PD9004       | PIK3CG | cna | gain    | BASIS    |
| PD9585       | PIK3CG | cna | hetloss | BASIS    |
| PD9702       | PIK3CG | cna | amp     | BASIS    |

|              |       |     |         |          |
|--------------|-------|-----|---------|----------|
| TCGA-AN-A0XU | PLCG2 | cna | gain    | TCGA     |
| TCGA-AO-A0JL | PLCG2 | cna | gain    | TCGA     |
| TCGA-BH-A0AW | PLCG2 | cna | hetloss | TCGA     |
| TCGA-BH-A0C0 | PLCG2 | cna | hetloss | TCGA     |
| TCGA-C8-A12L | PLCG2 | cna | hetloss | TCGA     |
| TCGA-D8-A27M | PLCG2 | cna | gain    | TCGA     |
| TCGA-E2-A1L7 | PLCG2 | cna | hetloss | TCGA     |
| TCGA-E9-A1NC | PLCG2 | cna | hetloss | TCGA     |
| TCGA-LL-A5YP | PLCG2 | cna | gain    | TCGA     |
| MB-0346      | PLCG2 | cna | gain    | METABRIC |
| MB-5107      | PLCG2 | cna | hetloss | METABRIC |
| MB-6271      | PLCG2 | cna | hetloss | METABRIC |
| MB-7032      | PLCG2 | cna | hetloss | METABRIC |
| MB-7038      | PLCG2 | cna | gain    | METABRIC |
| MB-7048      | PLCG2 | cna | hetloss | METABRIC |
| MB-0420      | PLCG2 | cna | hetloss | METABRIC |
| PD10014      | PLCG2 | cna | hetloss | BASIS    |
| PD11327      | PLCG2 | cna | gain    | BASIS    |
| PD11742      | PLCG2 | cna | hetloss | BASIS    |
| PD13299      | PLCG2 | cna | gain    | BASIS    |
| PD14442      | PLCG2 | cna | hetloss | BASIS    |
| PD23562      | PLCG2 | cna | gain    | BASIS    |
| PD24202      | PLCG2 | cna | hetloss | BASIS    |
| PD3890       | PLCG2 | cna | gain    | BASIS    |
| PD3905       | PLCG2 | cna | gain    | BASIS    |
| PD4005       | PLCG2 | cna | homdel  | BASIS    |
| PD4006       | PLCG2 | cna | hetloss | BASIS    |
| PD4107       | PLCG2 | cna | gain    | BASIS    |
| PD4826       | PLCG2 | cna | hetloss | BASIS    |
| PD4967       | PLCG2 | cna | hetloss | BASIS    |
| PD5945       | PLCG2 | cna | amp     | BASIS    |
| PD5948       | PLCG2 | cna | gain    | BASIS    |
| PD6413       | PLCG2 | cna | gain    | BASIS    |
| PD7215       | PLCG2 | cna | gain    | BASIS    |
| PD9585       | PLCG2 | cna | hetloss | BASIS    |
| PD9702       | PLCG2 | cna | gain    | BASIS    |
| TCGA-A2-A25B | PRF1  | cna | hetloss | TCGA     |
| TCGA-AN-A0XU | PRF1  | cna | hetloss | TCGA     |
| TCGA-AO-A0JL | PRF1  | cna | gain    | TCGA     |
| TCGA-BH-A0C0 | PRF1  | cna | gain    | TCGA     |
| TCGA-BH-A18R | PRF1  | cna | homdel  | TCGA     |
| TCGA-C8-A12L | PRF1  | cna | hetloss | TCGA     |
| TCGA-D8-A27M | PRF1  | cna | hetloss | TCGA     |
| TCGA-E2-A1L7 | PRF1  | cna | gain    | TCGA     |
| TCGA-LL-A5YP | PRF1  | cna | hetloss | TCGA     |
| MB-0346      | PRF1  | cna | gain    | METABRIC |
| MB-5070      | PRF1  | cna | gain    | METABRIC |

|              |       |     |         |          |
|--------------|-------|-----|---------|----------|
| MB-6098      | PRF1  | cna | hetloss | METABRIC |
| MB-7038      | PRF1  | cna | hetloss | METABRIC |
| MTS-T0064    | PRF1  | cna | gain    | METABRIC |
| PD10014      | PRF1  | cna | gain    | BASIS    |
| PD11327      | PRF1  | cna | gain    | BASIS    |
| PD11742      | PRF1  | cna | hetloss | BASIS    |
| PD13296      | PRF1  | cna | hetloss | BASIS    |
| PD13299      | PRF1  | cna | gain    | BASIS    |
| PD23574      | PRF1  | cna | gain    | BASIS    |
| PD24186      | PRF1  | cna | gain    | BASIS    |
| PD24202      | PRF1  | cna | hetloss | BASIS    |
| PD24206      | PRF1  | cna | gain    | BASIS    |
| PD3905       | PRF1  | cna | gain    | BASIS    |
| PD4006       | PRF1  | cna | gain    | BASIS    |
| PD4107       | PRF1  | cna | gain    | BASIS    |
| PD4826       | PRF1  | cna | gain    | BASIS    |
| PD5930       | PRF1  | cna | gain    | BASIS    |
| PD6406       | PRF1  | cna | hetloss | BASIS    |
| PD7067       | PRF1  | cna | gain    | BASIS    |
| PD7215       | PRF1  | cna | gain    | BASIS    |
| PD8621       | PRF1  | cna | gain    | BASIS    |
| PD8980       | PRF1  | cna | hetloss | BASIS    |
| PD9004       | PRF1  | cna | gain    | BASIS    |
| PD9585       | PRF1  | cna | hetloss | BASIS    |
| PD9702       | PRF1  | cna | gain    | BASIS    |
| TCGA-A2-A25B | PRKDC | cna | gain    | TCGA     |
| TCGA-AO-A0JL | PRKDC | cna | amp     | TCGA     |
| TCGA-BH-A0AW | PRKDC | cna | gain    | TCGA     |
| TCGA-BH-A0C0 | PRKDC | cna | gain    | TCGA     |
| TCGA-BH-A1FU | PRKDC | cna | gain    | TCGA     |
| TCGA-C8-A12L | PRKDC | cna | gain    | TCGA     |
| TCGA-D8-A27M | PRKDC | cna | amp     | TCGA     |
| MB-0346      | PRKDC | cna | gain    | METABRIC |
| MB-6098      | PRKDC | cna | gain    | METABRIC |
| MB-0420      | PRKDC | cna | gain    | METABRIC |
| PD10014      | PRKDC | cna | amp     | BASIS    |
| PD11327      | PRKDC | cna | gain    | BASIS    |
| PD13296      | PRKDC | cna | hetloss | BASIS    |
| PD13299      | PRKDC | cna | gain    | BASIS    |
| PD23562      | PRKDC | cna | gain    | BASIS    |
| PD23574      | PRKDC | cna | gain    | BASIS    |
| PD23578      | PRKDC | cna | hetloss | BASIS    |
| PD24186      | PRKDC | cna | gain    | BASIS    |
| PD24202      | PRKDC | cna | hetloss | BASIS    |
| PD24206      | PRKDC | cna | amp     | BASIS    |
| PD3905       | PRKDC | cna | gain    | BASIS    |
| PD4005       | PRKDC | cna | hetloss | BASIS    |



|              |       |     |         |          |
|--------------|-------|-----|---------|----------|
| PD4006       | PRKDC | cna | gain    | BASIS    |
| PD4107       | PRKDC | cna | gain    | BASIS    |
| PD4826       | PRKDC | cna | amp     | BASIS    |
| PD5930       | PRKDC | cna | gain    | BASIS    |
| PD5935       | PRKDC | cna | gain    | BASIS    |
| PD5945       | PRKDC | cna | gain    | BASIS    |
| PD5948       | PRKDC | cna | gain    | BASIS    |
| PD7067       | PRKDC | cna | amp     | BASIS    |
| PD7215       | PRKDC | cna | amp     | BASIS    |
| PD8621       | PRKDC | cna | gain    | BASIS    |
| PD8980       | PRKDC | cna | gain    | BASIS    |
| PD9004       | PRKDC | cna | gain    | BASIS    |
| PD9585       | PRKDC | cna | gain    | BASIS    |
| PD9702       | PRKDC | cna | gain    | BASIS    |
| TCGA-AN-A0XU | PTPN2 | cna | hetloss | TCGA     |
| TCGA-AO-A0JL | PTPN2 | cna | gain    | TCGA     |
| TCGA-BH-A0AW | PTPN2 | cna | amp     | TCGA     |
| TCGA-BH-A0C0 | PTPN2 | cna | hetloss | TCGA     |
| TCGA-BH-A1FU | PTPN2 | cna | gain    | TCGA     |
| TCGA-C8-A12L | PTPN2 | cna | gain    | TCGA     |
| TCGA-D8-A27M | PTPN2 | cna | hetloss | TCGA     |
| TCGA-LL-A5YP | PTPN2 | cna | gain    | TCGA     |
| MB-0346      | PTPN2 | cna | gain    | METABRIC |
| MB-5465      | PTPN2 | cna | hetloss | METABRIC |
| MB-7038      | PTPN2 | cna | gain    | METABRIC |
| MB-0420      | PTPN2 | cna | gain    | METABRIC |
| PD10014      | PTPN2 | cna | gain    | BASIS    |
| PD11327      | PTPN2 | cna | homdel  | BASIS    |
| PD13296      | PTPN2 | cna | hetloss | BASIS    |
| PD13299      | PTPN2 | cna | gain    | BASIS    |
| PD23562      | PTPN2 | cna | gain    | BASIS    |
| PD23574      | PTPN2 | cna | gain    | BASIS    |
| PD24186      | PTPN2 | cna | gain    | BASIS    |
| PD24206      | PTPN2 | cna | gain    | BASIS    |
| PD24337      | PTPN2 | cna | hetloss | BASIS    |
| PD3890       | PTPN2 | cna | hetloss | BASIS    |
| PD3905       | PTPN2 | cna | gain    | BASIS    |
| PD4006       | PTPN2 | cna | gain    | BASIS    |
| PD4107       | PTPN2 | cna | gain    | BASIS    |
| PD4967       | PTPN2 | cna | hetloss | BASIS    |
| PD5930       | PTPN2 | cna | gain    | BASIS    |
| PD5935       | PTPN2 | cna | gain    | BASIS    |
| PD5945       | PTPN2 | cna | amp     | BASIS    |
| PD5948       | PTPN2 | cna | gain    | BASIS    |
| PD7067       | PTPN2 | cna | gain    | BASIS    |
| PD7215       | PTPN2 | cna | gain    | BASIS    |
| PD8621       | PTPN2 | cna | gain    | BASIS    |

|                   |       |     |         |            |
|-------------------|-------|-----|---------|------------|
| PD8980            | PTPN2 | cna | hetloss | BASIS      |
| PD9004            | PTPN2 | cna | gain    | BASIS      |
| PD9702            | PTPN2 | cna | gain    | BASIS      |
| TCGA-A2-A25B      | PTPRT | cna | gain    | TCGA       |
| TCGA-AO-A0JL      | PTPRT | cna | gain    | TCGA       |
| TCGA-BH-A0AW      | PTPRT | cna | gain    | TCGA       |
| TCGA-BH-A0C0      | PTPRT | cna | gain    | TCGA       |
| TCGA-C8-A12L      | PTPRT | cna | gain    | TCGA       |
| TCGA-D8-A27M      | PTPRT | cna | gain    | TCGA       |
| TCGA-E2-A1L7      | PTPRT | cna | gain    | TCGA       |
| TCGA-E9-A1NC      | PTPRT | cna | hetloss | TCGA       |
| TCGA-LL-A5YP      | PTPRT | cna | hetloss | TCGA       |
| MB-0346           | PTPRT | cna | gain    | METABRIC   |
| MB-2827           | PTPRT | cna | amp     | METABRIC   |
| MB-5107           | PTPRT | cna | gain    | METABRIC   |
| MB-6060           | PTPRT | cna | amp     | METABRIC   |
| MB-6098           | PTPRT | cna | hetloss | METABRIC   |
| P-0002858-T01-IM3 | PTPRT | cna | amp     | MSK-IMPACT |
| PD11327           | PTPRT | cna | hetloss | BASIS      |
| PD13296           | PTPRT | cna | hetloss | BASIS      |
| PD13297           | PTPRT | cna | hetloss | BASIS      |
| PD13771           | PTPRT | cna | gain    | BASIS      |
| PD22355           | PTPRT | cna | hetloss | BASIS      |
| PD23578           | PTPRT | cna | hetloss | BASIS      |
| PD24186           | PTPRT | cna | gain    | BASIS      |
| PD24202           | PTPRT | cna | hetloss | BASIS      |
| PD24206           | PTPRT | cna | amp     | BASIS      |
| PD3905            | PTPRT | cna | gain    | BASIS      |
| PD4005            | PTPRT | cna | hetloss | BASIS      |
| PD4826            | PTPRT | cna | gain    | BASIS      |
| PD5935            | PTPRT | cna | gain    | BASIS      |
| PD5945            | PTPRT | cna | amp     | BASIS      |
| PD5948            | PTPRT | cna | gain    | BASIS      |
| PD6731            | PTPRT | cna | hetloss | BASIS      |
| PD7067            | PTPRT | cna | gain    | BASIS      |
| PD7215            | PTPRT | cna | amp     | BASIS      |
| PD8980            | PTPRT | cna | gain    | BASIS      |
| PD9004            | PTPRT | cna | gain    | BASIS      |
| PD9585            | PTPRT | cna | hetloss | BASIS      |
| TCGA-A2-A25B      | RBM10 | cna | gain    | TCGA       |
| TCGA-AN-A0XU      | RBM10 | cna | hetloss | TCGA       |
| TCGA-AO-A0JL      | RBM10 | cna | gain    | TCGA       |
| TCGA-BH-A0AW      | RBM10 | cna | gain    | TCGA       |
| TCGA-E2-A1L7      | RBM10 | cna | hetloss | TCGA       |
| TCGA-E9-A1NC      | RBM10 | cna | hetloss | TCGA       |
| MB-0346           | RBM10 | cna | hetloss | METABRIC   |
| MB-2827           | RBM10 | cna | hetloss | METABRIC   |

|              |       |     |         |          |
|--------------|-------|-----|---------|----------|
| MB-5465      | RBM10 | cna | gain    | METABRIC |
| MB-6098      | RBM10 | cna | hetloss | METABRIC |
| MB-0420      | RBM10 | cna | hetloss | METABRIC |
| PD10014      | RBM10 | cna | hetloss | BASIS    |
| PD11327      | RBM10 | cna | homdel  | BASIS    |
| PD13296      | RBM10 | cna | gain    | BASIS    |
| PD13299      | RBM10 | cna | amp     | BASIS    |
| PD13771      | RBM10 | cna | gain    | BASIS    |
| PD14442      | RBM10 | cna | gain    | BASIS    |
| PD23562      | RBM10 | cna | hetloss | BASIS    |
| PD23574      | RBM10 | cna | gain    | BASIS    |
| PD24206      | RBM10 | cna | homdel  | BASIS    |
| PD3905       | RBM10 | cna | gain    | BASIS    |
| PD4005       | RBM10 | cna | hetloss | BASIS    |
| PD4006       | RBM10 | cna | hetloss | BASIS    |
| PD4107       | RBM10 | cna | gain    | BASIS    |
| PD4826       | RBM10 | cna | gain    | BASIS    |
| PD4967       | RBM10 | cna | gain    | BASIS    |
| PD5935       | RBM10 | cna | gain    | BASIS    |
| PD5945       | RBM10 | cna | gain    | BASIS    |
| PD5948       | RBM10 | cna | gain    | BASIS    |
| PD6406       | RBM10 | cna | gain    | BASIS    |
| PD6413       | RBM10 | cna | gain    | BASIS    |
| PD7067       | RBM10 | cna | amp     | BASIS    |
| PD7215       | RBM10 | cna | gain    | BASIS    |
| PD8621       | RBM10 | cna | amp     | BASIS    |
| PD8980       | RBM10 | cna | hetloss | BASIS    |
| PD9004       | RBM10 | cna | gain    | BASIS    |
| TCGA-AN-A0XU | RHOH  | cna | hetloss | TCGA     |
| TCGA-AO-A0JL | RHOH  | cna | gain    | TCGA     |
| TCGA-BH-A0AW | RHOH  | cna | hetloss | TCGA     |
| TCGA-BH-A0C0 | RHOH  | cna | gain    | TCGA     |
| TCGA-BH-A1FU | RHOH  | cna | homdel  | TCGA     |
| TCGA-C8-A12L | RHOH  | cna | hetloss | TCGA     |
| TCGA-D8-A27M | RHOH  | cna | gain    | TCGA     |
| TCGA-E9-A1NC | RHOH  | cna | hetloss | TCGA     |
| TCGA-LL-A5YP | RHOH  | cna | hetloss | TCGA     |
| MB-0346      | RHOH  | cna | hetloss | METABRIC |
| MB-2827      | RHOH  | cna | homdel  | METABRIC |
| MB-5107      | RHOH  | cna | hetloss | METABRIC |
| MB-5465      | RHOH  | cna | hetloss | METABRIC |
| MB-6060      | RHOH  | cna | hetloss | METABRIC |
| MB-6098      | RHOH  | cna | hetloss | METABRIC |
| MB-7048      | RHOH  | cna | hetloss | METABRIC |
| MB-0420      | RHOH  | cna | hetloss | METABRIC |
| PD11327      | RHOH  | cna | homdel  | BASIS    |
| PD13296      | RHOH  | cna | hetloss | BASIS    |

|              |        |     |         |          |
|--------------|--------|-----|---------|----------|
| PD13297      | RHOH   | cna | hetloss | BASIS    |
| PD13299      | RHOH   | cna | hetloss | BASIS    |
| PD22355      | RHOH   | cna | hetloss | BASIS    |
| PD24186      | RHOH   | cna | gain    | BASIS    |
| PD24202      | RHOH   | cna | hetloss | BASIS    |
| PD24206      | RHOH   | cna | hetloss | BASIS    |
| PD24337      | RHOH   | cna | hetloss | BASIS    |
| PD4005       | RHOH   | cna | hetloss | BASIS    |
| PD4006       | RHOH   | cna | hetloss | BASIS    |
| PD4107       | RHOH   | cna | hetloss | BASIS    |
| PD4967       | RHOH   | cna | hetloss | BASIS    |
| PD5930       | RHOH   | cna | hetloss | BASIS    |
| PD5945       | RHOH   | cna | gain    | BASIS    |
| PD6413       | RHOH   | cna | hetloss | BASIS    |
| PD7067       | RHOH   | cna | gain    | BASIS    |
| PD8621       | RHOH   | cna | gain    | BASIS    |
| PD8980       | RHOH   | cna | hetloss | BASIS    |
| TCGA-A2-A25B | RICTOR | cna | amp     | TCGA     |
| TCGA-AN-A0XU | RICTOR | cna | gain    | TCGA     |
| TCGA-AO-A0JL | RICTOR | cna | gain    | TCGA     |
| TCGA-BH-A0AW | RICTOR | cna | gain    | TCGA     |
| TCGA-BH-A0C0 | RICTOR | cna | gain    | TCGA     |
| TCGA-BH-A1FU | RICTOR | cna | amp     | TCGA     |
| TCGA-E9-A1NC | RICTOR | cna | hetloss | TCGA     |
| TCGA-LL-A5YP | RICTOR | cna | amp     | TCGA     |
| MB-0346      | RICTOR | cna | gain    | METABRIC |
| MB-5070      | RICTOR | cna | gain    | METABRIC |
| MB-6060      | RICTOR | cna | gain    | METABRIC |
| MB-6098      | RICTOR | cna | amp     | METABRIC |
| MB-0420      | RICTOR | cna | gain    | METABRIC |
| PD10014      | RICTOR | cna | hetloss | BASIS    |
| PD11327      | RICTOR | cna | gain    | BASIS    |
| PD13299      | RICTOR | cna | gain    | BASIS    |
| PD23562      | RICTOR | cna | gain    | BASIS    |
| PD23574      | RICTOR | cna | gain    | BASIS    |
| PD24186      | RICTOR | cna | gain    | BASIS    |
| PD24206      | RICTOR | cna | gain    | BASIS    |
| PD24337      | RICTOR | cna | hetloss | BASIS    |
| PD3890       | RICTOR | cna | gain    | BASIS    |
| PD3905       | RICTOR | cna | gain    | BASIS    |
| PD4005       | RICTOR | cna | hetloss | BASIS    |
| PD4006       | RICTOR | cna | gain    | BASIS    |
| PD4107       | RICTOR | cna | gain    | BASIS    |
| PD4826       | RICTOR | cna | gain    | BASIS    |
| PD5930       | RICTOR | cna | gain    | BASIS    |
| PD5945       | RICTOR | cna | amp     | BASIS    |
| PD5948       | RICTOR | cna | gain    | BASIS    |

|              |        |     |         |          |
|--------------|--------|-----|---------|----------|
| PD6406       | RICTOR | cna | hetloss | BASIS    |
| PD6413       | RICTOR | cna | gain    | BASIS    |
| PD7215       | RICTOR | cna | amp     | BASIS    |
| PD8980       | RICTOR | cna | gain    | BASIS    |
| PD9004       | RICTOR | cna | gain    | BASIS    |
| PD9585       | RICTOR | cna | gain    | BASIS    |
| TCGA-A2-A25B | RPL11  | cna | hetloss | TCGA     |
| TCGA-AN-A0XU | RPL11  | cna | hetloss | TCGA     |
| TCGA-AO-A0JL | RPL11  | cna | hetloss | TCGA     |
| TCGA-BH-A0AW | RPL11  | cna | gain    | TCGA     |
| TCGA-BH-A0C0 | RPL11  | cna | hetloss | TCGA     |
| TCGA-BH-A18R | RPL11  | cna | homdel  | TCGA     |
| TCGA-BH-A1FU | RPL11  | cna | gain    | TCGA     |
| TCGA-C8-A12L | RPL11  | cna | hetloss | TCGA     |
| TCGA-D8-A27M | RPL11  | cna | gain    | TCGA     |
| TCGA-E2-A1L7 | RPL11  | cna | hetloss | TCGA     |
| TCGA-E9-A1NC | RPL11  | cna | hetloss | TCGA     |
| TCGA-LL-A5YP | RPL11  | cna | hetloss | TCGA     |
| MB-2827      | RPL11  | cna | hetloss | METABRIC |
| MB-5070      | RPL11  | cna | hetloss | METABRIC |
| MB-5465      | RPL11  | cna | hetloss | METABRIC |
| MB-6060      | RPL11  | cna | hetloss | METABRIC |
| MB-6098      | RPL11  | cna | hetloss | METABRIC |
| MB-6271      | RPL11  | cna | hetloss | METABRIC |
| MB-0420      | RPL11  | cna | hetloss | METABRIC |
| PD10014      | RPL11  | cna | gain    | BASIS    |
| PD11742      | RPL11  | cna | hetloss | BASIS    |
| PD13296      | RPL11  | cna | hetloss | BASIS    |
| PD13771      | RPL11  | cna | hetloss | BASIS    |
| PD22355      | RPL11  | cna | hetloss | BASIS    |
| PD24186      | RPL11  | cna | gain    | BASIS    |
| PD24206      | RPL11  | cna | hetloss | BASIS    |
| PD24337      | RPL11  | cna | hetloss | BASIS    |
| PD3890       | RPL11  | cna | hetloss | BASIS    |
| PD3905       | RPL11  | cna | gain    | BASIS    |
| PD4006       | RPL11  | cna | gain    | BASIS    |
| PD4826       | RPL11  | cna | gain    | BASIS    |
| PD5945       | RPL11  | cna | amp     | BASIS    |
| PD7067       | RPL11  | cna | gain    | BASIS    |
| PD7215       | RPL11  | cna | gain    | BASIS    |
| PD9004       | RPL11  | cna | hetloss | BASIS    |
| PD9585       | RPL11  | cna | hetloss | BASIS    |
| TCGA-A2-A25B | RPL22  | cna | hetloss | TCGA     |
| TCGA-AN-A0XU | RPL22  | cna | hetloss | TCGA     |
| TCGA-AO-A0JL | RPL22  | cna | hetloss | TCGA     |
| TCGA-BH-A0AW | RPL22  | cna | gain    | TCGA     |
| TCGA-BH-A0C0 | RPL22  | cna | gain    | TCGA     |

|              |       |     |         |          |
|--------------|-------|-----|---------|----------|
| TCGA-BH-A18R | RPL22 | cna | homdel  | TCGA     |
| TCGA-BH-A1FU | RPL22 | cna | gain    | TCGA     |
| TCGA-C8-A12L | RPL22 | cna | hetloss | TCGA     |
| TCGA-D8-A27M | RPL22 | cna | gain    | TCGA     |
| TCGA-E2-A1L7 | RPL22 | cna | hetloss | TCGA     |
| TCGA-E9-A1NC | RPL22 | cna | hetloss | TCGA     |
| TCGA-LL-A5YP | RPL22 | cna | amp     | TCGA     |
| MB-2827      | RPL22 | cna | hetloss | METABRIC |
| MB-5070      | RPL22 | cna | hetloss | METABRIC |
| MB-5465      | RPL22 | cna | hetloss | METABRIC |
| MB-6060      | RPL22 | cna | hetloss | METABRIC |
| MB-6098      | RPL22 | cna | hetloss | METABRIC |
| MB-0420      | RPL22 | cna | hetloss | METABRIC |
| PD10014      | RPL22 | cna | gain    | BASIS    |
| PD11327      | RPL22 | cna | gain    | BASIS    |
| PD11742      | RPL22 | cna | hetloss | BASIS    |
| PD22355      | RPL22 | cna | hetloss | BASIS    |
| PD24202      | RPL22 | cna | hetloss | BASIS    |
| PD24206      | RPL22 | cna | gain    | BASIS    |
| PD24337      | RPL22 | cna | hetloss | BASIS    |
| PD3890       | RPL22 | cna | hetloss | BASIS    |
| PD3905       | RPL22 | cna | gain    | BASIS    |
| PD4107       | RPL22 | cna | gain    | BASIS    |
| PD4826       | RPL22 | cna | gain    | BASIS    |
| PD5945       | RPL22 | cna | gain    | BASIS    |
| PD6406       | RPL22 | cna | hetloss | BASIS    |
| PD7067       | RPL22 | cna | gain    | BASIS    |
| PD7215       | RPL22 | cna | gain    | BASIS    |
| PD8621       | RPL22 | cna | gain    | BASIS    |
| PD8980       | RPL22 | cna | hetloss | BASIS    |
| PD9004       | RPL22 | cna | hetloss | BASIS    |
| TCGA-AN-A0XU | RPN1  | cna | gain    | TCGA     |
| TCGA-BH-A0C0 | RPN1  | cna | gain    | TCGA     |
| TCGA-BH-A18R | RPN1  | cna | gain    | TCGA     |
| TCGA-BH-A1FU | RPN1  | cna | hetloss | TCGA     |
| TCGA-C8-A12L | RPN1  | cna | gain    | TCGA     |
| TCGA-E2-A1L7 | RPN1  | cna | hetloss | TCGA     |
| TCGA-LL-A5YP | RPN1  | cna | gain    | TCGA     |
| MB-0346      | RPN1  | cna | hetloss | METABRIC |
| MB-5070      | RPN1  | cna | gain    | METABRIC |
| MB-5107      | RPN1  | cna | gain    | METABRIC |
| MB-5465      | RPN1  | cna | gain    | METABRIC |
| MB-6098      | RPN1  | cna | hetloss | METABRIC |
| MB-7038      | RPN1  | cna | gain    | METABRIC |
| PD10014      | RPN1  | cna | gain    | BASIS    |
| PD11327      | RPN1  | cna | gain    | BASIS    |
| PD13297      | RPN1  | cna | hetloss | BASIS    |

|              |        |     |         |          |
|--------------|--------|-----|---------|----------|
| PD13299      | RPN1   | cna | gain    | BASIS    |
| PD13771      | RPN1   | cna | hetloss | BASIS    |
| PD23561      | RPN1   | cna | hetloss | BASIS    |
| PD23574      | RPN1   | cna | gain    | BASIS    |
| PD24186      | RPN1   | cna | gain    | BASIS    |
| PD24206      | RPN1   | cna | gain    | BASIS    |
| PD3905       | RPN1   | cna | gain    | BASIS    |
| PD4005       | RPN1   | cna | hetloss | BASIS    |
| PD4107       | RPN1   | cna | gain    | BASIS    |
| PD4826       | RPN1   | cna | gain    | BASIS    |
| PD5935       | RPN1   | cna | gain    | BASIS    |
| PD5945       | RPN1   | cna | gain    | BASIS    |
| PD5948       | RPN1   | cna | gain    | BASIS    |
| PD6731       | RPN1   | cna | gain    | BASIS    |
| PD7067       | RPN1   | cna | gain    | BASIS    |
| PD7215       | RPN1   | cna | gain    | BASIS    |
| PD8621       | RPN1   | cna | gain    | BASIS    |
| PD8980       | RPN1   | cna | gain    | BASIS    |
| PD9004       | RPN1   | cna | gain    | BASIS    |
| PD9702       | RPN1   | cna | gain    | BASIS    |
| TCGA-AN-A0XU | SH3GL1 | cna | hetloss | TCGA     |
| TCGA-AO-A0JL | SH3GL1 | cna | gain    | TCGA     |
| TCGA-BH-A0C0 | SH3GL1 | cna | gain    | TCGA     |
| TCGA-BH-A1FU | SH3GL1 | cna | hetloss | TCGA     |
| TCGA-C8-A12L | SH3GL1 | cna | amp     | TCGA     |
| TCGA-D8-A27M | SH3GL1 | cna | hetloss | TCGA     |
| TCGA-E9-A1NC | SH3GL1 | cna | hetloss | TCGA     |
| TCGA-EW-A10X | SH3GL1 | cna | hetloss | TCGA     |
| TCGA-LL-A5YP | SH3GL1 | cna | hetloss | TCGA     |
| MB-0346      | SH3GL1 | cna | gain    | METABRIC |
| MB-2827      | SH3GL1 | cna | hetloss | METABRIC |
| MB-5070      | SH3GL1 | cna | hetloss | METABRIC |
| MB-5465      | SH3GL1 | cna | gain    | METABRIC |
| MB-6060      | SH3GL1 | cna | gain    | METABRIC |
| MB-6098      | SH3GL1 | cna | hetloss | METABRIC |
| MB-7038      | SH3GL1 | cna | hetloss | METABRIC |
| MB-0420      | SH3GL1 | cna | hetloss | METABRIC |
| PD10014      | SH3GL1 | cna | hetloss | BASIS    |
| PD11742      | SH3GL1 | cna | hetloss | BASIS    |
| PD14442      | SH3GL1 | cna | hetloss | BASIS    |
| PD22355      | SH3GL1 | cna | hetloss | BASIS    |
| PD23574      | SH3GL1 | cna | gain    | BASIS    |
| PD24202      | SH3GL1 | cna | gain    | BASIS    |
| PD24206      | SH3GL1 | cna | hetloss | BASIS    |
| PD3905       | SH3GL1 | cna | gain    | BASIS    |
| PD4006       | SH3GL1 | cna | gain    | BASIS    |
| PD4826       | SH3GL1 | cna | gain    | BASIS    |

|              |        |     |         |          |
|--------------|--------|-----|---------|----------|
| PD4967       | SH3GL1 | cna | hetloss | BASIS    |
| PD5930       | SH3GL1 | cna | gain    | BASIS    |
| PD5945       | SH3GL1 | cna | gain    | BASIS    |
| PD5948       | SH3GL1 | cna | gain    | BASIS    |
| PD7067       | SH3GL1 | cna | gain    | BASIS    |
| PD8621       | SH3GL1 | cna | gain    | BASIS    |
| PD8980       | SH3GL1 | cna | gain    | BASIS    |
| PD9004       | SH3GL1 | cna | hetloss | BASIS    |
| PD9702       | SH3GL1 | cna | gain    | BASIS    |
| TCGA-A2-A25B | SMC1A  | cna | gain    | TCGA     |
| TCGA-AN-A0XU | SMC1A  | cna | hetloss | TCGA     |
| TCGA-AO-A0JL | SMC1A  | cna | gain    | TCGA     |
| TCGA-BH-A0AW | SMC1A  | cna | gain    | TCGA     |
| TCGA-E2-A1L7 | SMC1A  | cna | hetloss | TCGA     |
| TCGA-E9-A1NC | SMC1A  | cna | hetloss | TCGA     |
| MB-0346      | SMC1A  | cna | gain    | METABRIC |
| MB-2827      | SMC1A  | cna | hetloss | METABRIC |
| MB-5465      | SMC1A  | cna | gain    | METABRIC |
| MB-6098      | SMC1A  | cna | hetloss | METABRIC |
| MB-0420      | SMC1A  | cna | hetloss | METABRIC |
| PD10014      | SMC1A  | cna | hetloss | BASIS    |
| PD11327      | SMC1A  | cna | homdel  | BASIS    |
| PD13296      | SMC1A  | cna | gain    | BASIS    |
| PD13297      | SMC1A  | cna | gain    | BASIS    |
| PD13299      | SMC1A  | cna | gain    | BASIS    |
| PD13771      | SMC1A  | cna | gain    | BASIS    |
| PD14442      | SMC1A  | cna | gain    | BASIS    |
| PD23562      | SMC1A  | cna | hetloss | BASIS    |
| PD23574      | SMC1A  | cna | gain    | BASIS    |
| PD24206      | SMC1A  | cna | amp     | BASIS    |
| PD3905       | SMC1A  | cna | gain    | BASIS    |
| PD4005       | SMC1A  | cna | hetloss | BASIS    |
| PD4006       | SMC1A  | cna | hetloss | BASIS    |
| PD4107       | SMC1A  | cna | gain    | BASIS    |
| PD4826       | SMC1A  | cna | gain    | BASIS    |
| PD4967       | SMC1A  | cna | gain    | BASIS    |
| PD5935       | SMC1A  | cna | gain    | BASIS    |
| PD5945       | SMC1A  | cna | gain    | BASIS    |
| PD5948       | SMC1A  | cna | gain    | BASIS    |
| PD6406       | SMC1A  | cna | gain    | BASIS    |
| PD6413       | SMC1A  | cna | gain    | BASIS    |
| PD7067       | SMC1A  | cna | gain    | BASIS    |
| PD7215       | SMC1A  | cna | amp     | BASIS    |
| PD8621       | SMC1A  | cna | amp     | BASIS    |
| PD9004       | SMC1A  | cna | gain    | BASIS    |
| TCGA-A2-A25B | SOX10  | cna | hetloss | TCGA     |
| TCGA-BH-A0AW | SOX10  | cna | hetloss | TCGA     |



|              |        |     |         |          |
|--------------|--------|-----|---------|----------|
| TCGA-BH-A1FU | SOX10  | cna | gain    | TCGA     |
| TCGA-C8-A12L | SOX10  | cna | gain    | TCGA     |
| TCGA-D8-A27M | SOX10  | cna | gain    | TCGA     |
| TCGA-E9-A1NC | SOX10  | cna | gain    | TCGA     |
| TCGA-LL-A5YP | SOX10  | cna | amp     | TCGA     |
| MB-0346      | SOX10  | cna | gain    | METABRIC |
| MB-5465      | SOX10  | cna | gain    | METABRIC |
| MB-6098      | SOX10  | cna | gain    | METABRIC |
| MTS-T0064    | SOX10  | cna | gain    | METABRIC |
| PD11742      | SOX10  | cna | hetloss | BASIS    |
| PD13296      | SOX10  | cna | gain    | BASIS    |
| PD13297      | SOX10  | cna | gain    | BASIS    |
| PD13299      | SOX10  | cna | gain    | BASIS    |
| PD14442      | SOX10  | cna | hetloss | BASIS    |
| PD22355      | SOX10  | cna | gain    | BASIS    |
| PD23562      | SOX10  | cna | gain    | BASIS    |
| PD23574      | SOX10  | cna | gain    | BASIS    |
| PD23578      | SOX10  | cna | gain    | BASIS    |
| PD24206      | SOX10  | cna | hetloss | BASIS    |
| PD3905       | SOX10  | cna | gain    | BASIS    |
| PD4005       | SOX10  | cna | gain    | BASIS    |
| PD4006       | SOX10  | cna | gain    | BASIS    |
| PD4107       | SOX10  | cna | gain    | BASIS    |
| PD4826       | SOX10  | cna | gain    | BASIS    |
| PD4967       | SOX10  | cna | hetloss | BASIS    |
| PD5935       | SOX10  | cna | gain    | BASIS    |
| PD5945       | SOX10  | cna | amp     | BASIS    |
| PD5948       | SOX10  | cna | gain    | BASIS    |
| PD6731       | SOX10  | cna | hetloss | BASIS    |
| PD7067       | SOX10  | cna | gain    | BASIS    |
| PD7215       | SOX10  | cna | gain    | BASIS    |
| PD8621       | SOX10  | cna | gain    | BASIS    |
| PD9004       | SOX10  | cna | gain    | BASIS    |
| PD9702       | SOX10  | cna | gain    | BASIS    |
| TCGA-AN-A0XU | SRGAP3 | cna | gain    | TCGA     |
| TCGA-BH-A0C0 | SRGAP3 | cna | gain    | TCGA     |
| TCGA-BH-A18R | SRGAP3 | cna | gain    | TCGA     |
| TCGA-BH-A1FU | SRGAP3 | cna | hetloss | TCGA     |
| TCGA-C8-A12L | SRGAP3 | cna | gain    | TCGA     |
| TCGA-D8-A27M | SRGAP3 | cna | hetloss | TCGA     |
| TCGA-E9-A1NC | SRGAP3 | cna | hetloss | TCGA     |
| TCGA-LL-A5YP | SRGAP3 | cna | amp     | TCGA     |
| MB-6060      | SRGAP3 | cna | amp     | METABRIC |
| MB-7038      | SRGAP3 | cna | hetloss | METABRIC |
| MB-7048      | SRGAP3 | cna | hetloss | METABRIC |
| MB-0420      | SRGAP3 | cna | hetloss | METABRIC |
| PD10014      | SRGAP3 | cna | hetloss | BASIS    |

|              |        |     |         |          |
|--------------|--------|-----|---------|----------|
| PD11327      | SRGAP3 | cna | gain    | BASIS    |
| PD11742      | SRGAP3 | cna | gain    | BASIS    |
| PD13296      | SRGAP3 | cna | gain    | BASIS    |
| PD13299      | SRGAP3 | cna | gain    | BASIS    |
| PD13771      | SRGAP3 | cna | gain    | BASIS    |
| PD23561      | SRGAP3 | cna | hetloss | BASIS    |
| PD23562      | SRGAP3 | cna | gain    | BASIS    |
| PD23574      | SRGAP3 | cna | gain    | BASIS    |
| PD24186      | SRGAP3 | cna | amp     | BASIS    |
| PD24206      | SRGAP3 | cna | gain    | BASIS    |
| PD3905       | SRGAP3 | cna | gain    | BASIS    |
| PD4006       | SRGAP3 | cna | gain    | BASIS    |
| PD4826       | SRGAP3 | cna | gain    | BASIS    |
| PD5945       | SRGAP3 | cna | amp     | BASIS    |
| PD5948       | SRGAP3 | cna | gain    | BASIS    |
| PD6406       | SRGAP3 | cna | hetloss | BASIS    |
| PD6731       | SRGAP3 | cna | hetloss | BASIS    |
| PD7067       | SRGAP3 | cna | gain    | BASIS    |
| PD7215       | SRGAP3 | cna | gain    | BASIS    |
| PD8980       | SRGAP3 | cna | gain    | BASIS    |
| PD9004       | SRGAP3 | cna | gain    | BASIS    |
| PD9585       | SRGAP3 | cna | hetloss | BASIS    |
| PD9702       | SRGAP3 | cna | gain    | BASIS    |
| TCGA-A2-A25B | STK40  | cna | hetloss | TCGA     |
| TCGA-AN-A0XU | STK40  | cna | hetloss | TCGA     |
| TCGA-AO-A0JL | STK40  | cna | hetloss | TCGA     |
| TCGA-BH-A0AW | STK40  | cna | gain    | TCGA     |
| TCGA-BH-A0C0 | STK40  | cna | gain    | TCGA     |
| TCGA-BH-A1FU | STK40  | cna | gain    | TCGA     |
| TCGA-C8-A12L | STK40  | cna | hetloss | TCGA     |
| TCGA-D8-A27M | STK40  | cna | gain    | TCGA     |
| TCGA-E2-A1L7 | STK40  | cna | gain    | TCGA     |
| TCGA-LL-A5YP | STK40  | cna | gain    | TCGA     |
| MB-0346      | STK40  | cna | hetloss | METABRIC |
| MB-5465      | STK40  | cna | hetloss | METABRIC |
| MB-6060      | STK40  | cna | hetloss | METABRIC |
| MB-6098      | STK40  | cna | hetloss | METABRIC |
| MB-7038      | STK40  | cna | gain    | METABRIC |
| MB-0420      | STK40  | cna | hetloss | METABRIC |
| PD10014      | STK40  | cna | gain    | BASIS    |
| PD13296      | STK40  | cna | gain    | BASIS    |
| PD13299      | STK40  | cna | gain    | BASIS    |
| PD13771      | STK40  | cna | gain    | BASIS    |
| PD24186      | STK40  | cna | gain    | BASIS    |
| PD24206      | STK40  | cna | gain    | BASIS    |
| PD24337      | STK40  | cna | hetloss | BASIS    |
| PD3905       | STK40  | cna | gain    | BASIS    |

|              |       |     |         |          |
|--------------|-------|-----|---------|----------|
| PD4006       | STK40 | cna | gain    | BASIS    |
| PD4107       | STK40 | cna | gain    | BASIS    |
| PD4826       | STK40 | cna | gain    | BASIS    |
| PD5935       | STK40 | cna | gain    | BASIS    |
| PD5945       | STK40 | cna | amp     | BASIS    |
| PD7067       | STK40 | cna | gain    | BASIS    |
| PD7215       | STK40 | cna | gain    | BASIS    |
| PD8621       | STK40 | cna | gain    | BASIS    |
| PD8980       | STK40 | cna | gain    | BASIS    |
| PD9004       | STK40 | cna | hetloss | BASIS    |
| PD9585       | STK40 | cna | hetloss | BASIS    |
| PD9702       | STK40 | cna | gain    | BASIS    |
| TCGA-A2-A25B | TBX3  | cna | gain    | TCGA     |
| TCGA-AN-A0XU | TBX3  | cna | hetloss | TCGA     |
| TCGA-AO-A0JL | TBX3  | cna | hetloss | TCGA     |
| TCGA-BH-A0C0 | TBX3  | cna | gain    | TCGA     |
| TCGA-BH-A18R | TBX3  | cna | gain    | TCGA     |
| TCGA-BH-A1FU | TBX3  | cna | hetloss | TCGA     |
| TCGA-D8-A27M | TBX3  | cna | hetloss | TCGA     |
| TCGA-E2-A1L7 | TBX3  | cna | hetloss | TCGA     |
| TCGA-LL-A5YP | TBX3  | cna | hetloss | TCGA     |
| MB-0346      | TBX3  | cna | gain    | METABRIC |
| MB-2827      | TBX3  | cna | hetloss | METABRIC |
| MB-5070      | TBX3  | cna | hetloss | METABRIC |
| MB-7048      | TBX3  | cna | hetloss | METABRIC |
| PD10014      | TBX3  | cna | gain    | BASIS    |
| PD11327      | TBX3  | cna | gain    | BASIS    |
| PD11742      | TBX3  | cna | hetloss | BASIS    |
| PD13296      | TBX3  | cna | hetloss | BASIS    |
| PD22355      | TBX3  | cna | hetloss | BASIS    |
| PD23574      | TBX3  | cna | gain    | BASIS    |
| PD23578      | TBX3  | cna | hetloss | BASIS    |
| PD24206      | TBX3  | cna | homdel  | BASIS    |
| PD3890       | TBX3  | cna | hetloss | BASIS    |
| PD3905       | TBX3  | cna | gain    | BASIS    |
| PD4005       | TBX3  | cna | hetloss | BASIS    |
| PD4006       | TBX3  | cna | gain    | BASIS    |
| PD4107       | TBX3  | cna | gain    | BASIS    |
| PD4826       | TBX3  | cna | gain    | BASIS    |
| PD5945       | TBX3  | cna | gain    | BASIS    |
| PD5948       | TBX3  | cna | gain    | BASIS    |
| PD6406       | TBX3  | cna | hetloss | BASIS    |
| PD6413       | TBX3  | cna | hetloss | BASIS    |
| PD6731       | TBX3  | cna | hetloss | BASIS    |
| PD7067       | TBX3  | cna | gain    | BASIS    |
| PD9004       | TBX3  | cna | hetloss | BASIS    |
| PD9585       | TBX3  | cna | hetloss | BASIS    |

|                   |      |     |         |            |
|-------------------|------|-----|---------|------------|
| PD9702            | TBX3 | cna | gain    | BASIS      |
| TCGA-AN-A0XU      | TCF3 | cna | hetloss | TCGA       |
| TCGA-AO-A0JL      | TCF3 | cna | gain    | TCGA       |
| TCGA-BH-A0C0      | TCF3 | cna | gain    | TCGA       |
| TCGA-BH-A1FU      | TCF3 | cna | hetloss | TCGA       |
| TCGA-C8-A12L      | TCF3 | cna | hetloss | TCGA       |
| TCGA-D8-A27M      | TCF3 | cna | hetloss | TCGA       |
| TCGA-E9-A1NC      | TCF3 | cna | hetloss | TCGA       |
| TCGA-EW-A10X      | TCF3 | cna | hetloss | TCGA       |
| TCGA-LL-A5YP      | TCF3 | cna | hetloss | TCGA       |
| MB-0346           | TCF3 | cna | gain    | METABRIC   |
| MB-2827           | TCF3 | cna | hetloss | METABRIC   |
| MB-5070           | TCF3 | cna | hetloss | METABRIC   |
| MB-6098           | TCF3 | cna | hetloss | METABRIC   |
| MB-7038           | TCF3 | cna | hetloss | METABRIC   |
| MB-0420           | TCF3 | cna | hetloss | METABRIC   |
| P-0009557-T01-IM5 | TCF3 | cna | homdel  | MSK-IMPACT |
| PD11742           | TCF3 | cna | hetloss | BASIS      |
| PD14442           | TCF3 | cna | hetloss | BASIS      |
| PD22355           | TCF3 | cna | hetloss | BASIS      |
| PD23574           | TCF3 | cna | gain    | BASIS      |
| PD23578           | TCF3 | cna | hetloss | BASIS      |
| PD24202           | TCF3 | cna | hetloss | BASIS      |
| PD24206           | TCF3 | cna | hetloss | BASIS      |
| PD3890            | TCF3 | cna | hetloss | BASIS      |
| PD3905            | TCF3 | cna | gain    | BASIS      |
| PD4006            | TCF3 | cna | gain    | BASIS      |
| PD4826            | TCF3 | cna | hetloss | BASIS      |
| PD4967            | TCF3 | cna | hetloss | BASIS      |
| PD5930            | TCF3 | cna | gain    | BASIS      |
| PD5945            | TCF3 | cna | gain    | BASIS      |
| PD5948            | TCF3 | cna | gain    | BASIS      |
| PD7067            | TCF3 | cna | gain    | BASIS      |
| PD8621            | TCF3 | cna | gain    | BASIS      |
| PD8980            | TCF3 | cna | gain    | BASIS      |
| PD9004            | TCF3 | cna | hetloss | BASIS      |
| PD9585            | TCF3 | cna | hetloss | BASIS      |
| TCGA-A2-A25B      | TET1 | cna | hetloss | TCGA       |
| TCGA-AN-A0XU      | TET1 | cna | hetloss | TCGA       |
| TCGA-AO-A0JL      | TET1 | cna | gain    | TCGA       |
| TCGA-BH-A0C0      | TET1 | cna | gain    | TCGA       |
| TCGA-C8-A12L      | TET1 | cna | hetloss | TCGA       |
| TCGA-D8-A27M      | TET1 | cna | hetloss | TCGA       |
| TCGA-E2-A1L7      | TET1 | cna | gain    | TCGA       |
| TCGA-LL-A5YP      | TET1 | cna | gain    | TCGA       |
| MB-0346           | TET1 | cna | hetloss | METABRIC   |
| MB-2827           | TET1 | cna | hetloss | METABRIC   |

|              |        |     |         |          |
|--------------|--------|-----|---------|----------|
| MB-6098      | TET1   | cna | hetloss | METABRIC |
| MB-7038      | TET1   | cna | hetloss | METABRIC |
| MB-7048      | TET1   | cna | hetloss | METABRIC |
| MTS-T0064    | TET1   | cna | gain    | METABRIC |
| PD10014      | TET1   | cna | gain    | BASIS    |
| PD11327      | TET1   | cna | hetloss | BASIS    |
| PD11742      | TET1   | cna | hetloss | BASIS    |
| PD13296      | TET1   | cna | hetloss | BASIS    |
| PD13299      | TET1   | cna | gain    | BASIS    |
| PD23574      | TET1   | cna | gain    | BASIS    |
| PD24186      | TET1   | cna | gain    | BASIS    |
| PD24202      | TET1   | cna | hetloss | BASIS    |
| PD24206      | TET1   | cna | hetloss | BASIS    |
| PD3905       | TET1   | cna | gain    | BASIS    |
| PD4006       | TET1   | cna | gain    | BASIS    |
| PD4107       | TET1   | cna | gain    | BASIS    |
| PD4826       | TET1   | cna | gain    | BASIS    |
| PD5930       | TET1   | cna | gain    | BASIS    |
| PD6406       | TET1   | cna | hetloss | BASIS    |
| PD7067       | TET1   | cna | gain    | BASIS    |
| PD7215       | TET1   | cna | gain    | BASIS    |
| PD8621       | TET1   | cna | gain    | BASIS    |
| PD8980       | TET1   | cna | hetloss | BASIS    |
| PD9004       | TET1   | cna | gain    | BASIS    |
| PD9585       | TET1   | cna | hetloss | BASIS    |
| PD9702       | TET1   | cna | gain    | BASIS    |
| TCGA-A2-A25B | THRAP3 | cna | hetloss | TCGA     |
| TCGA-AN-A0XU | THRAP3 | cna | hetloss | TCGA     |
| TCGA-AO-A0JL | THRAP3 | cna | hetloss | TCGA     |
| TCGA-BH-A0AW | THRAP3 | cna | gain    | TCGA     |
| TCGA-BH-A0C0 | THRAP3 | cna | gain    | TCGA     |
| TCGA-BH-A1FU | THRAP3 | cna | gain    | TCGA     |
| TCGA-C8-A12L | THRAP3 | cna | hetloss | TCGA     |
| TCGA-D8-A27M | THRAP3 | cna | gain    | TCGA     |
| TCGA-E2-A1L7 | THRAP3 | cna | gain    | TCGA     |
| TCGA-LL-A5YP | THRAP3 | cna | gain    | TCGA     |
| MB-0346      | THRAP3 | cna | hetloss | METABRIC |
| MB-5465      | THRAP3 | cna | hetloss | METABRIC |
| MB-6060      | THRAP3 | cna | hetloss | METABRIC |
| MB-6098      | THRAP3 | cna | hetloss | METABRIC |
| MB-7038      | THRAP3 | cna | gain    | METABRIC |
| MB-0420      | THRAP3 | cna | hetloss | METABRIC |
| PD10014      | THRAP3 | cna | gain    | BASIS    |
| PD13296      | THRAP3 | cna | gain    | BASIS    |
| PD13299      | THRAP3 | cna | gain    | BASIS    |
| PD13771      | THRAP3 | cna | gain    | BASIS    |
| PD24186      | THRAP3 | cna | gain    | BASIS    |

|              |        |     |         |          |
|--------------|--------|-----|---------|----------|
| PD24206      | THRAP3 | cna | gain    | BASIS    |
| PD24337      | THRAP3 | cna | hetloss | BASIS    |
| PD3905       | THRAP3 | cna | gain    | BASIS    |
| PD4006       | THRAP3 | cna | gain    | BASIS    |
| PD4107       | THRAP3 | cna | gain    | BASIS    |
| PD4826       | THRAP3 | cna | gain    | BASIS    |
| PD5935       | THRAP3 | cna | gain    | BASIS    |
| PD5945       | THRAP3 | cna | amp     | BASIS    |
| PD7067       | THRAP3 | cna | gain    | BASIS    |
| PD7215       | THRAP3 | cna | gain    | BASIS    |
| PD8621       | THRAP3 | cna | gain    | BASIS    |
| PD8980       | THRAP3 | cna | gain    | BASIS    |
| PD9004       | THRAP3 | cna | hetloss | BASIS    |
| PD9585       | THRAP3 | cna | hetloss | BASIS    |
| PD9702       | THRAP3 | cna | gain    | BASIS    |
| TCGA-AN-A0XU | TICAM1 | cna | hetloss | TCGA     |
| TCGA-AO-A0JL | TICAM1 | cna | gain    | TCGA     |
| TCGA-BH-A0C0 | TICAM1 | cna | gain    | TCGA     |
| TCGA-BH-A1FU | TICAM1 | cna | hetloss | TCGA     |
| TCGA-C8-A12L | TICAM1 | cna | gain    | TCGA     |
| TCGA-D8-A27M | TICAM1 | cna | hetloss | TCGA     |
| TCGA-E9-A1NC | TICAM1 | cna | hetloss | TCGA     |
| TCGA-EW-A10X | TICAM1 | cna | hetloss | TCGA     |
| TCGA-LL-A5YP | TICAM1 | cna | hetloss | TCGA     |
| MB-0346      | TICAM1 | cna | gain    | METABRIC |
| MB-2827      | TICAM1 | cna | hetloss | METABRIC |
| MB-5070      | TICAM1 | cna | hetloss | METABRIC |
| MB-5465      | TICAM1 | cna | gain    | METABRIC |
| MB-6060      | TICAM1 | cna | gain    | METABRIC |
| MB-6098      | TICAM1 | cna | hetloss | METABRIC |
| MB-7038      | TICAM1 | cna | hetloss | METABRIC |
| MB-0420      | TICAM1 | cna | hetloss | METABRIC |
| PD10014      | TICAM1 | cna | hetloss | BASIS    |
| PD11742      | TICAM1 | cna | hetloss | BASIS    |
| PD14442      | TICAM1 | cna | hetloss | BASIS    |
| PD23574      | TICAM1 | cna | gain    | BASIS    |
| PD24202      | TICAM1 | cna | gain    | BASIS    |
| PD24206      | TICAM1 | cna | hetloss | BASIS    |
| PD3905       | TICAM1 | cna | gain    | BASIS    |
| PD4006       | TICAM1 | cna | gain    | BASIS    |
| PD4107       | TICAM1 | cna | gain    | BASIS    |
| PD4826       | TICAM1 | cna | gain    | BASIS    |
| PD4967       | TICAM1 | cna | hetloss | BASIS    |
| PD5930       | TICAM1 | cna | gain    | BASIS    |
| PD5945       | TICAM1 | cna | gain    | BASIS    |
| PD5948       | TICAM1 | cna | gain    | BASIS    |
| PD7067       | TICAM1 | cna | gain    | BASIS    |

|              |          |     |         |          |
|--------------|----------|-----|---------|----------|
| PD8621       | TICAM1   | cna | gain    | BASIS    |
| PD8980       | TICAM1   | cna | gain    | BASIS    |
| PD9004       | TICAM1   | cna | hetloss | BASIS    |
| PD9702       | TICAM1   | cna | gain    | BASIS    |
| TCGA-AN-A0XU | TNFRSF17 | cna | gain    | TCGA     |
| TCGA-AO-A0JL | TNFRSF17 | cna | gain    | TCGA     |
| TCGA-BH-A0AW | TNFRSF17 | cna | gain    | TCGA     |
| TCGA-BH-A0C0 | TNFRSF17 | cna | gain    | TCGA     |
| TCGA-C8-A12L | TNFRSF17 | cna | gain    | TCGA     |
| TCGA-E2-A1L7 | TNFRSF17 | cna | hetloss | TCGA     |
| TCGA-LL-A5YP | TNFRSF17 | cna | gain    | TCGA     |
| MB-0346      | TNFRSF17 | cna | gain    | METABRIC |
| MB-6060      | TNFRSF17 | cna | gain    | METABRIC |
| MB-6098      | TNFRSF17 | cna | hetloss | METABRIC |
| MB-6271      | TNFRSF17 | cna | gain    | METABRIC |
| MB-7032      | TNFRSF17 | cna | gain    | METABRIC |
| MB-7038      | TNFRSF17 | cna | hetloss | METABRIC |
| MB-0420      | TNFRSF17 | cna | hetloss | METABRIC |
| PD10014      | TNFRSF17 | cna | hetloss | BASIS    |
| PD11327      | TNFRSF17 | cna | hetloss | BASIS    |
| PD11742      | TNFRSF17 | cna | gain    | BASIS    |
| PD13296      | TNFRSF17 | cna | gain    | BASIS    |
| PD13297      | TNFRSF17 | cna | hetloss | BASIS    |
| PD13299      | TNFRSF17 | cna | gain    | BASIS    |
| PD22355      | TNFRSF17 | cna | hetloss | BASIS    |
| PD24202      | TNFRSF17 | cna | hetloss | BASIS    |
| PD24206      | TNFRSF17 | cna | gain    | BASIS    |
| PD24337      | TNFRSF17 | cna | hetloss | BASIS    |
| PD3905       | TNFRSF17 | cna | gain    | BASIS    |
| PD4005       | TNFRSF17 | cna | gain    | BASIS    |
| PD4107       | TNFRSF17 | cna | gain    | BASIS    |
| PD4826       | TNFRSF17 | cna | gain    | BASIS    |
| PD5935       | TNFRSF17 | cna | gain    | BASIS    |
| PD5945       | TNFRSF17 | cna | gain    | BASIS    |
| PD5948       | TNFRSF17 | cna | gain    | BASIS    |
| PD7067       | TNFRSF17 | cna | gain    | BASIS    |
| PD7215       | TNFRSF17 | cna | amp     | BASIS    |
| PD9004       | TNFRSF17 | cna | gain    | BASIS    |
| PD9585       | TNFRSF17 | cna | hetloss | BASIS    |
| PD9702       | TNFRSF17 | cna | gain    | BASIS    |
| TCGA-A2-A25B | TP53     | cna | hetloss | TCGA     |
| TCGA-AN-A0XU | TP53     | cna | hetloss | TCGA     |
| TCGA-AO-A0JL | TP53     | cna | gain    | TCGA     |
| TCGA-BH-A0AW | TP53     | cna | hetloss | TCGA     |
| TCGA-BH-A0C0 | TP53     | cna | hetloss | TCGA     |
| TCGA-C8-A12L | TP53     | cna | hetloss | TCGA     |
| TCGA-D8-A27M | TP53     | cna | hetloss | TCGA     |

|                   |        |     |         |            |
|-------------------|--------|-----|---------|------------|
| TCGA-E2-A1L7      | TP53   | cna | hetloss | TCGA       |
| TCGA-E9-A1NC      | TP53   | cna | hetloss | TCGA       |
| TCGA-LL-A5YP      | TP53   | cna | gain    | TCGA       |
| MB-0346           | TP53   | cna | hetloss | METABRIC   |
| MB-2827           | TP53   | cna | hetloss | METABRIC   |
| MB-5070           | TP53   | cna | hetloss | METABRIC   |
| MB-5107           | TP53   | cna | hetloss | METABRIC   |
| MB-6271           | TP53   | cna | hetloss | METABRIC   |
| MB-7048           | TP53   | cna | hetloss | METABRIC   |
| MB-0420           | TP53   | cna | hetloss | METABRIC   |
| P-0002591-T01-IM3 | TP53   | cna | homdel  | MSK-IMPACT |
| PD11742           | TP53   | cna | hetloss | BASIS      |
| PD13296           | TP53   | cna | hetloss | BASIS      |
| PD13771           | TP53   | cna | hetloss | BASIS      |
| PD22355           | TP53   | cna | hetloss | BASIS      |
| PD24202           | TP53   | cna | hetloss | BASIS      |
| PD24206           | TP53   | cna | hetloss | BASIS      |
| PD24337           | TP53   | cna | hetloss | BASIS      |
| PD3890            | TP53   | cna | hetloss | BASIS      |
| PD3905            | TP53   | cna | gain    | BASIS      |
| PD4005            | TP53   | cna | homdel  | BASIS      |
| PD4826            | TP53   | cna | hetloss | BASIS      |
| PD4967            | TP53   | cna | hetloss | BASIS      |
| PD5945            | TP53   | cna | gain    | BASIS      |
| PD6406            | TP53   | cna | hetloss | BASIS      |
| PD6413            | TP53   | cna | hetloss | BASIS      |
| PD6731            | TP53   | cna | hetloss | BASIS      |
| PD7067            | TP53   | cna | gain    | BASIS      |
| PD9585            | TP53   | cna | hetloss | BASIS      |
| TCGA-A2-A25B      | TRIOBP | cna | hetloss | TCGA       |
| TCGA-BH-A0AW      | TRIOBP | cna | hetloss | TCGA       |
| TCGA-BH-A1FU      | TRIOBP | cna | gain    | TCGA       |
| TCGA-C8-A12L      | TRIOBP | cna | gain    | TCGA       |
| TCGA-D8-A27M      | TRIOBP | cna | gain    | TCGA       |
| TCGA-E9-A1NC      | TRIOBP | cna | gain    | TCGA       |
| TCGA-LL-A5YP      | TRIOBP | cna | gain    | TCGA       |
| MB-0346           | TRIOBP | cna | gain    | METABRIC   |
| MB-5465           | TRIOBP | cna | gain    | METABRIC   |
| MB-6098           | TRIOBP | cna | gain    | METABRIC   |
| MTS-T0064         | TRIOBP | cna | gain    | METABRIC   |
| PD11742           | TRIOBP | cna | hetloss | BASIS      |
| PD13296           | TRIOBP | cna | gain    | BASIS      |
| PD13297           | TRIOBP | cna | gain    | BASIS      |
| PD13299           | TRIOBP | cna | gain    | BASIS      |
| PD14442           | TRIOBP | cna | hetloss | BASIS      |
| PD22355           | TRIOBP | cna | gain    | BASIS      |
| PD23562           | TRIOBP | cna | gain    | BASIS      |



|              |        |     |         |          |
|--------------|--------|-----|---------|----------|
| PD23574      | TRIOBP | cna | gain    | BASIS    |
| PD23578      | TRIOBP | cna | gain    | BASIS    |
| PD24206      | TRIOBP | cna | hetloss | BASIS    |
| PD3905       | TRIOBP | cna | gain    | BASIS    |
| PD4005       | TRIOBP | cna | gain    | BASIS    |
| PD4006       | TRIOBP | cna | gain    | BASIS    |
| PD4107       | TRIOBP | cna | gain    | BASIS    |
| PD4826       | TRIOBP | cna | gain    | BASIS    |
| PD4967       | TRIOBP | cna | hetloss | BASIS    |
| PD5935       | TRIOBP | cna | gain    | BASIS    |
| PD5945       | TRIOBP | cna | amp     | BASIS    |
| PD5948       | TRIOBP | cna | gain    | BASIS    |
| PD6731       | TRIOBP | cna | hetloss | BASIS    |
| PD7067       | TRIOBP | cna | gain    | BASIS    |
| PD7215       | TRIOBP | cna | gain    | BASIS    |
| PD8621       | TRIOBP | cna | gain    | BASIS    |
| PD9004       | TRIOBP | cna | gain    | BASIS    |
| PD9702       | TRIOBP | cna | gain    | BASIS    |
| TCGA-AN-A0XU | TYMS   | cna | hetloss | TCGA     |
| TCGA-AO-A0JL | TYMS   | cna | gain    | TCGA     |
| TCGA-BH-A0AW | TYMS   | cna | hetloss | TCGA     |
| TCGA-BH-A0C0 | TYMS   | cna | hetloss | TCGA     |
| TCGA-BH-A1FU | TYMS   | cna | gain    | TCGA     |
| TCGA-C8-A12L | TYMS   | cna | gain    | TCGA     |
| TCGA-D8-A27M | TYMS   | cna | hetloss | TCGA     |
| TCGA-LL-A5YP | TYMS   | cna | gain    | TCGA     |
| MB-0346      | TYMS   | cna | gain    | METABRIC |
| MB-5107      | TYMS   | cna | hetloss | METABRIC |
| MB-5465      | TYMS   | cna | hetloss | METABRIC |
| MB-6098      | TYMS   | cna | hetloss | METABRIC |
| MB-0420      | TYMS   | cna | gain    | METABRIC |
| MTS-T0064    | TYMS   | cna | hetloss | METABRIC |
| PD11327      | TYMS   | cna | gain    | BASIS    |
| PD11742      | TYMS   | cna | hetloss | BASIS    |
| PD13296      | TYMS   | cna | hetloss | BASIS    |
| PD13299      | TYMS   | cna | gain    | BASIS    |
| PD23574      | TYMS   | cna | gain    | BASIS    |
| PD24206      | TYMS   | cna | gain    | BASIS    |
| PD24337      | TYMS   | cna | hetloss | BASIS    |
| PD3890       | TYMS   | cna | hetloss | BASIS    |
| PD3905       | TYMS   | cna | gain    | BASIS    |
| PD4005       | TYMS   | cna | hetloss | BASIS    |
| PD4006       | TYMS   | cna | gain    | BASIS    |
| PD4107       | TYMS   | cna | gain    | BASIS    |
| PD4826       | TYMS   | cna | gain    | BASIS    |
| PD4967       | TYMS   | cna | hetloss | BASIS    |
| PD5935       | TYMS   | cna | gain    | BASIS    |

|              |        |     |         |          |
|--------------|--------|-----|---------|----------|
| PD5945       | TYMS   | cna | amp     | BASIS    |
| PD5948       | TYMS   | cna | gain    | BASIS    |
| PD7215       | TYMS   | cna | gain    | BASIS    |
| PD8621       | TYMS   | cna | gain    | BASIS    |
| PD9004       | TYMS   | cna | gain    | BASIS    |
| PD9585       | TYMS   | cna | hetloss | BASIS    |
| PD9702       | TYMS   | cna | gain    | BASIS    |
| TCGA-AN-A0XU | YES1   | cna | hetloss | TCGA     |
| TCGA-AO-A0JL | YES1   | cna | gain    | TCGA     |
| TCGA-BH-A0AW | YES1   | cna | hetloss | TCGA     |
| TCGA-BH-A0C0 | YES1   | cna | hetloss | TCGA     |
| TCGA-BH-A1FU | YES1   | cna | gain    | TCGA     |
| TCGA-C8-A12L | YES1   | cna | gain    | TCGA     |
| TCGA-D8-A27M | YES1   | cna | hetloss | TCGA     |
| TCGA-LL-A5YP | YES1   | cna | gain    | TCGA     |
| MB-0346      | YES1   | cna | gain    | METABRIC |
| MB-5107      | YES1   | cna | hetloss | METABRIC |
| MB-5465      | YES1   | cna | hetloss | METABRIC |
| MB-6098      | YES1   | cna | hetloss | METABRIC |
| MB-0420      | YES1   | cna | gain    | METABRIC |
| MTS-T0064    | YES1   | cna | hetloss | METABRIC |
| PD11327      | YES1   | cna | gain    | BASIS    |
| PD11742      | YES1   | cna | hetloss | BASIS    |
| PD13296      | YES1   | cna | hetloss | BASIS    |
| PD13299      | YES1   | cna | gain    | BASIS    |
| PD23574      | YES1   | cna | gain    | BASIS    |
| PD24202      | YES1   | cna | gain    | BASIS    |
| PD24206      | YES1   | cna | gain    | BASIS    |
| PD24337      | YES1   | cna | hetloss | BASIS    |
| PD3890       | YES1   | cna | hetloss | BASIS    |
| PD3905       | YES1   | cna | gain    | BASIS    |
| PD4005       | YES1   | cna | hetloss | BASIS    |
| PD4006       | YES1   | cna | gain    | BASIS    |
| PD4107       | YES1   | cna | gain    | BASIS    |
| PD4967       | YES1   | cna | hetloss | BASIS    |
| PD5935       | YES1   | cna | gain    | BASIS    |
| PD5945       | YES1   | cna | amp     | BASIS    |
| PD5948       | YES1   | cna | gain    | BASIS    |
| PD7215       | YES1   | cna | gain    | BASIS    |
| PD8621       | YES1   | cna | gain    | BASIS    |
| PD9004       | YES1   | cna | gain    | BASIS    |
| PD9585       | YES1   | cna | hetloss | BASIS    |
| PD9702       | YES1   | cna | gain    | BASIS    |
| TCGA-AN-A0XU | ZNF521 | cna | hetloss | TCGA     |
| TCGA-AO-A0JL | ZNF521 | cna | gain    | TCGA     |
| TCGA-BH-A0AW | ZNF521 | cna | hetloss | TCGA     |
| TCGA-BH-A0C0 | ZNF521 | cna | gain    | TCGA     |

|              |        |     |         |          |
|--------------|--------|-----|---------|----------|
| TCGA-C8-A12L | ZNF521 | cna | gain    | TCGA     |
| TCGA-D8-A27M | ZNF521 | cna | hetloss | TCGA     |
| TCGA-E2-A1L7 | ZNF521 | cna | gain    | TCGA     |
| TCGA-LL-A5YP | ZNF521 | cna | amp     | TCGA     |
| MB-0346      | ZNF521 | cna | hetloss | METABRIC |
| MB-5465      | ZNF521 | cna | hetloss | METABRIC |
| MB-0420      | ZNF521 | cna | gain    | METABRIC |
| PD10014      | ZNF521 | cna | gain    | BASIS    |
| PD11327      | ZNF521 | cna | amp     | BASIS    |
| PD13297      | ZNF521 | cna | gain    | BASIS    |
| PD13299      | ZNF521 | cna | gain    | BASIS    |
| PD22355      | ZNF521 | cna | hetloss | BASIS    |
| PD23562      | ZNF521 | cna | gain    | BASIS    |
| PD23574      | ZNF521 | cna | gain    | BASIS    |
| PD24186      | ZNF521 | cna | gain    | BASIS    |
| PD24202      | ZNF521 | cna | hetloss | BASIS    |
| PD24206      | ZNF521 | cna | gain    | BASIS    |
| PD24337      | ZNF521 | cna | gain    | BASIS    |
| PD3905       | ZNF521 | cna | gain    | BASIS    |
| PD4005       | ZNF521 | cna | hetloss | BASIS    |
| PD4006       | ZNF521 | cna | gain    | BASIS    |
| PD4107       | ZNF521 | cna | gain    | BASIS    |
| PD4967       | ZNF521 | cna | hetloss | BASIS    |
| PD5930       | ZNF521 | cna | gain    | BASIS    |
| PD5935       | ZNF521 | cna | gain    | BASIS    |
| PD5945       | ZNF521 | cna | gain    | BASIS    |
| PD5948       | ZNF521 | cna | amp     | BASIS    |
| PD7067       | ZNF521 | cna | gain    | BASIS    |
| PD7215       | ZNF521 | cna | gain    | BASIS    |
| PD8980       | ZNF521 | cna | hetloss | BASIS    |
| PD9004       | ZNF521 | cna | gain    | BASIS    |
| PD9702       | ZNF521 | cna | gain    | BASIS    |
| TCGA-A2-A25B | ACVR1B | cna | gain    | TCGA     |
| TCGA-AN-A0XU | ACVR1B | cna | gain    | TCGA     |
| TCGA-AO-A0JL | ACVR1B | cna | hetloss | TCGA     |
| TCGA-BH-A18R | ACVR1B | cna | gain    | TCGA     |
| TCGA-BH-A1FU | ACVR1B | cna | hetloss | TCGA     |
| TCGA-C8-A12L | ACVR1B | cna | gain    | TCGA     |
| TCGA-D8-A27M | ACVR1B | cna | hetloss | TCGA     |
| TCGA-E2-A1L7 | ACVR1B | cna | hetloss | TCGA     |
| TCGA-E9-A1NC | ACVR1B | cna | hetloss | TCGA     |
| TCGA-LL-A5YP | ACVR1B | cna | hetloss | TCGA     |
| MB-0346      | ACVR1B | cna | gain    | METABRIC |
| MB-2827      | ACVR1B | cna | hetloss | METABRIC |
| MB-5070      | ACVR1B | cna | hetloss | METABRIC |
| MB-6098      | ACVR1B | cna | hetloss | METABRIC |
| MB-7038      | ACVR1B | cna | hetloss | METABRIC |

|              |        |     |         |          |
|--------------|--------|-----|---------|----------|
| MB-0420      | ACVR1B | cna | hetloss | METABRIC |
| PD11327      | ACVR1B | cna | hetloss | BASIS    |
| PD13296      | ACVR1B | cna | hetloss | BASIS    |
| PD13297      | ACVR1B | cna | hetloss | BASIS    |
| PD23578      | ACVR1B | cna | hetloss | BASIS    |
| PD24202      | ACVR1B | cna | hetloss | BASIS    |
| PD24206      | ACVR1B | cna | gain    | BASIS    |
| PD24337      | ACVR1B | cna | hetloss | BASIS    |
| PD3890       | ACVR1B | cna | hetloss | BASIS    |
| PD3905       | ACVR1B | cna | gain    | BASIS    |
| PD4107       | ACVR1B | cna | hetloss | BASIS    |
| PD4826       | ACVR1B | cna | gain    | BASIS    |
| PD5945       | ACVR1B | cna | gain    | BASIS    |
| PD6406       | ACVR1B | cna | hetloss | BASIS    |
| PD6413       | ACVR1B | cna | hetloss | BASIS    |
| PD6731       | ACVR1B | cna | hetloss | BASIS    |
| PD7067       | ACVR1B | cna | gain    | BASIS    |
| PD8621       | ACVR1B | cna | hetloss | BASIS    |
| PD9585       | ACVR1B | cna | hetloss | BASIS    |
| PD9702       | ACVR1B | cna | amp     | BASIS    |
| TCGA-A2-A25B | BCL10  | cna | gain    | TCGA     |
| TCGA-AN-A0XU | BCL10  | cna | hetloss | TCGA     |
| TCGA-BH-A0AW | BCL10  | cna | gain    | TCGA     |
| TCGA-BH-A0C0 | BCL10  | cna | hetloss | TCGA     |
| TCGA-BH-A1FU | BCL10  | cna | gain    | TCGA     |
| TCGA-C8-A12L | BCL10  | cna | hetloss | TCGA     |
| TCGA-D8-A27M | BCL10  | cna | hetloss | TCGA     |
| TCGA-E2-A1L7 | BCL10  | cna | gain    | TCGA     |
| TCGA-LL-A5YP | BCL10  | cna | hetloss | TCGA     |
| MB-0346      | BCL10  | cna | hetloss | METABRIC |
| MB-2827      | BCL10  | cna | hetloss | METABRIC |
| MB-6060      | BCL10  | cna | hetloss | METABRIC |
| MB-6098      | BCL10  | cna | hetloss | METABRIC |
| MB-7038      | BCL10  | cna | gain    | METABRIC |
| PD11742      | BCL10  | cna | hetloss | BASIS    |
| PD13299      | BCL10  | cna | gain    | BASIS    |
| PD22355      | BCL10  | cna | hetloss | BASIS    |
| PD23574      | BCL10  | cna | gain    | BASIS    |
| PD23578      | BCL10  | cna | gain    | BASIS    |
| PD24186      | BCL10  | cna | gain    | BASIS    |
| PD24206      | BCL10  | cna | gain    | BASIS    |
| PD3890       | BCL10  | cna | gain    | BASIS    |
| PD3905       | BCL10  | cna | gain    | BASIS    |
| PD4005       | BCL10  | cna | gain    | BASIS    |
| PD4107       | BCL10  | cna | gain    | BASIS    |
| PD4826       | BCL10  | cna | gain    | BASIS    |
| PD5930       | BCL10  | cna | gain    | BASIS    |

|              |       |     |         |          |
|--------------|-------|-----|---------|----------|
| PD5945       | BCL10 | cna | gain    | BASIS    |
| PD5948       | BCL10 | cna | gain    | BASIS    |
| PD7067       | BCL10 | cna | gain    | BASIS    |
| PD7215       | BCL10 | cna | gain    | BASIS    |
| PD8621       | BCL10 | cna | gain    | BASIS    |
| PD9004       | BCL10 | cna | gain    | BASIS    |
| PD9585       | BCL10 | cna | hetloss | BASIS    |
| PD9702       | BCL10 | cna | gain    | BASIS    |
| TCGA-A2-A25B | BRD3  | cna | gain    | TCGA     |
| TCGA-AN-A0XU | BRD3  | cna | hetloss | TCGA     |
| TCGA-AO-A0JL | BRD3  | cna | hetloss | TCGA     |
| TCGA-BH-A0C0 | BRD3  | cna | gain    | TCGA     |
| TCGA-C8-A12L | BRD3  | cna | gain    | TCGA     |
| TCGA-E2-A1L7 | BRD3  | cna | hetloss | TCGA     |
| TCGA-E9-A1NC | BRD3  | cna | hetloss | TCGA     |
| TCGA-LL-A5YP | BRD3  | cna | hetloss | TCGA     |
| MB-0346      | BRD3  | cna | hetloss | METABRIC |
| MB-2827      | BRD3  | cna | amp     | METABRIC |
| MB-5070      | BRD3  | cna | hetloss | METABRIC |
| MB-7038      | BRD3  | cna | hetloss | METABRIC |
| MB-0420      | BRD3  | cna | hetloss | METABRIC |
| PD10014      | BRD3  | cna | gain    | BASIS    |
| PD11327      | BRD3  | cna | gain    | BASIS    |
| PD13299      | BRD3  | cna | gain    | BASIS    |
| PD22355      | BRD3  | cna | gain    | BASIS    |
| PD24186      | BRD3  | cna | gain    | BASIS    |
| PD24202      | BRD3  | cna | hetloss | BASIS    |
| PD24206      | BRD3  | cna | gain    | BASIS    |
| PD24337      | BRD3  | cna | hetloss | BASIS    |
| PD3890       | BRD3  | cna | hetloss | BASIS    |
| PD3905       | BRD3  | cna | gain    | BASIS    |
| PD4005       | BRD3  | cna | hetloss | BASIS    |
| PD4006       | BRD3  | cna | gain    | BASIS    |
| PD4107       | BRD3  | cna | hetloss | BASIS    |
| PD4826       | BRD3  | cna | gain    | BASIS    |
| PD5945       | BRD3  | cna | gain    | BASIS    |
| PD5948       | BRD3  | cna | gain    | BASIS    |
| PD6406       | BRD3  | cna | hetloss | BASIS    |
| PD6731       | BRD3  | cna | hetloss | BASIS    |
| PD7067       | BRD3  | cna | gain    | BASIS    |
| PD7215       | BRD3  | cna | gain    | BASIS    |
| PD8621       | BRD3  | cna | gain    | BASIS    |
| PD9004       | BRD3  | cna | hetloss | BASIS    |
| TCGA-AO-A0JL | BRD4  | cna | gain    | TCGA     |
| TCGA-BH-A0C0 | BRD4  | cna | gain    | TCGA     |
| TCGA-BH-A1FU | BRD4  | cna | hetloss | TCGA     |
| TCGA-C8-A12L | BRD4  | cna | gain    | TCGA     |

|                   |       |     |         |            |
|-------------------|-------|-----|---------|------------|
| TCGA-D8-A27M      | BRD4  | cna | hetloss | TCGA       |
| TCGA-EW-A10X      | BRD4  | cna | hetloss | TCGA       |
| TCGA-LL-A5YP      | BRD4  | cna | hetloss | TCGA       |
| MB-0346           | BRD4  | cna | hetloss | METABRIC   |
| MB-2827           | BRD4  | cna | hetloss | METABRIC   |
| MB-5465           | BRD4  | cna | gain    | METABRIC   |
| MB-6098           | BRD4  | cna | hetloss | METABRIC   |
| MB-7038           | BRD4  | cna | gain    | METABRIC   |
| MB-0420           | BRD4  | cna | hetloss | METABRIC   |
| MTS-T0064         | BRD4  | cna | amp     | METABRIC   |
| P-0009557-T01-IM5 | BRD4  | cna | homdel  | MSK-IMPACT |
| PD14442           | BRD4  | cna | hetloss | BASIS      |
| PD22355           | BRD4  | cna | gain    | BASIS      |
| PD23562           | BRD4  | cna | gain    | BASIS      |
| PD23574           | BRD4  | cna | gain    | BASIS      |
| PD24186           | BRD4  | cna | gain    | BASIS      |
| PD24206           | BRD4  | cna | hetloss | BASIS      |
| PD3905            | BRD4  | cna | gain    | BASIS      |
| PD4006            | BRD4  | cna | amp     | BASIS      |
| PD4107            | BRD4  | cna | gain    | BASIS      |
| PD4826            | BRD4  | cna | gain    | BASIS      |
| PD4967            | BRD4  | cna | hetloss | BASIS      |
| PD5930            | BRD4  | cna | gain    | BASIS      |
| PD5935            | BRD4  | cna | gain    | BASIS      |
| PD5945            | BRD4  | cna | amp     | BASIS      |
| PD5948            | BRD4  | cna | gain    | BASIS      |
| PD6413            | BRD4  | cna | gain    | BASIS      |
| PD7067            | BRD4  | cna | gain    | BASIS      |
| PD7215            | BRD4  | cna | amp     | BASIS      |
| PD8621            | BRD4  | cna | gain    | BASIS      |
| PD9702            | BRD4  | cna | gain    | BASIS      |
| TCGA-AO-A0JL      | BRSK1 | cna | hetloss | TCGA       |
| TCGA-BH-A0AW      | BRSK1 | cna | gain    | TCGA       |
| TCGA-BH-A0C0      | BRSK1 | cna | gain    | TCGA       |
| TCGA-BH-A1FU      | BRSK1 | cna | hetloss | TCGA       |
| TCGA-C8-A12L      | BRSK1 | cna | gain    | TCGA       |
| TCGA-D8-A27M      | BRSK1 | cna | hetloss | TCGA       |
| TCGA-EW-A10X      | BRSK1 | cna | hetloss | TCGA       |
| TCGA-LL-A5YP      | BRSK1 | cna | gain    | TCGA       |
| MB-0346           | BRSK1 | cna | hetloss | METABRIC   |
| MB-2827           | BRSK1 | cna | hetloss | METABRIC   |
| MB-6098           | BRSK1 | cna | hetloss | METABRIC   |
| MB-7048           | BRSK1 | cna | gain    | METABRIC   |
| PD11327           | BRSK1 | cna | gain    | BASIS      |
| PD13296           | BRSK1 | cna | gain    | BASIS      |
| PD13299           | BRSK1 | cna | gain    | BASIS      |
| PD13771           | BRSK1 | cna | hetloss | BASIS      |

|                   |       |     |         |            |
|-------------------|-------|-----|---------|------------|
| PD23562           | BRSK1 | cna | gain    | BASIS      |
| PD23574           | BRSK1 | cna | gain    | BASIS      |
| PD24186           | BRSK1 | cna | gain    | BASIS      |
| PD24206           | BRSK1 | cna | hetloss | BASIS      |
| PD3890            | BRSK1 | cna | hetloss | BASIS      |
| PD3905            | BRSK1 | cna | gain    | BASIS      |
| PD4006            | BRSK1 | cna | gain    | BASIS      |
| PD4107            | BRSK1 | cna | gain    | BASIS      |
| PD4826            | BRSK1 | cna | gain    | BASIS      |
| PD5935            | BRSK1 | cna | gain    | BASIS      |
| PD5945            | BRSK1 | cna | gain    | BASIS      |
| PD5948            | BRSK1 | cna | gain    | BASIS      |
| PD6406            | BRSK1 | cna | gain    | BASIS      |
| PD7067            | BRSK1 | cna | gain    | BASIS      |
| PD7215            | BRSK1 | cna | gain    | BASIS      |
| PD8621            | BRSK1 | cna | gain    | BASIS      |
| PD8980            | BRSK1 | cna | hetloss | BASIS      |
| PD9585            | BRSK1 | cna | gain    | BASIS      |
| PD9702            | BRSK1 | cna | gain    | BASIS      |
| TCGA-AO-A0JL      | CALR  | cna | gain    | TCGA       |
| TCGA-BH-A0C0      | CALR  | cna | gain    | TCGA       |
| TCGA-BH-A1FU      | CALR  | cna | hetloss | TCGA       |
| TCGA-C8-A12L      | CALR  | cna | gain    | TCGA       |
| TCGA-D8-A27M      | CALR  | cna | hetloss | TCGA       |
| TCGA-EW-A10X      | CALR  | cna | hetloss | TCGA       |
| TCGA-LL-A5YP      | CALR  | cna | hetloss | TCGA       |
| MB-0346           | CALR  | cna | hetloss | METABRIC   |
| MB-2827           | CALR  | cna | hetloss | METABRIC   |
| MB-5465           | CALR  | cna | gain    | METABRIC   |
| MB-6098           | CALR  | cna | hetloss | METABRIC   |
| MB-7038           | CALR  | cna | hetloss | METABRIC   |
| MB-0420           | CALR  | cna | hetloss | METABRIC   |
| P-0009557-T01-IM5 | CALR  | cna | homdel  | MSK-IMPACT |
| PD11742           | CALR  | cna | hetloss | BASIS      |
| PD13297           | CALR  | cna | gain    | BASIS      |
| PD14442           | CALR  | cna | hetloss | BASIS      |
| PD23562           | CALR  | cna | gain    | BASIS      |
| PD23574           | CALR  | cna | gain    | BASIS      |
| PD24186           | CALR  | cna | amp     | BASIS      |
| PD24206           | CALR  | cna | homdel  | BASIS      |
| PD3905            | CALR  | cna | gain    | BASIS      |
| PD4006            | CALR  | cna | amp     | BASIS      |
| PD4107            | CALR  | cna | gain    | BASIS      |
| PD4826            | CALR  | cna | gain    | BASIS      |
| PD4967            | CALR  | cna | hetloss | BASIS      |
| PD5930            | CALR  | cna | gain    | BASIS      |
| PD5935            | CALR  | cna | gain    | BASIS      |

|              |        |     |         |          |
|--------------|--------|-----|---------|----------|
| PD5945       | CALR   | cna | amp     | BASIS    |
| PD5948       | CALR   | cna | gain    | BASIS    |
| PD6413       | CALR   | cna | gain    | BASIS    |
| PD7067       | CALR   | cna | gain    | BASIS    |
| PD7215       | CALR   | cna | amp     | BASIS    |
| PD8621       | CALR   | cna | gain    | BASIS    |
| PD9702       | CALR   | cna | gain    | BASIS    |
| TCGA-A2-A25B | CAMTA1 | cna | hetloss | TCGA     |
| TCGA-AN-A0XU | CAMTA1 | cna | hetloss | TCGA     |
| TCGA-AO-A0JL | CAMTA1 | cna | hetloss | TCGA     |
| TCGA-BH-A0AW | CAMTA1 | cna | gain    | TCGA     |
| TCGA-BH-A0C0 | CAMTA1 | cna | gain    | TCGA     |
| TCGA-BH-A18R | CAMTA1 | cna | homdel  | TCGA     |
| TCGA-BH-A1FU | CAMTA1 | cna | gain    | TCGA     |
| TCGA-C8-A12L | CAMTA1 | cna | hetloss | TCGA     |
| TCGA-D8-A27M | CAMTA1 | cna | gain    | TCGA     |
| TCGA-E2-A1L7 | CAMTA1 | cna | hetloss | TCGA     |
| TCGA-E9-A1NC | CAMTA1 | cna | hetloss | TCGA     |
| TCGA-LL-A5YP | CAMTA1 | cna | amp     | TCGA     |
| MB-2827      | CAMTA1 | cna | hetloss | METABRIC |
| MB-5070      | CAMTA1 | cna | hetloss | METABRIC |
| MB-5465      | CAMTA1 | cna | hetloss | METABRIC |
| MB-6060      | CAMTA1 | cna | hetloss | METABRIC |
| MB-6098      | CAMTA1 | cna | gain    | METABRIC |
| MB-0420      | CAMTA1 | cna | hetloss | METABRIC |
| PD10014      | CAMTA1 | cna | gain    | BASIS    |
| PD11742      | CAMTA1 | cna | hetloss | BASIS    |
| PD22355      | CAMTA1 | cna | hetloss | BASIS    |
| PD24202      | CAMTA1 | cna | hetloss | BASIS    |
| PD24206      | CAMTA1 | cna | gain    | BASIS    |
| PD24337      | CAMTA1 | cna | hetloss | BASIS    |
| PD3890       | CAMTA1 | cna | hetloss | BASIS    |
| PD3905       | CAMTA1 | cna | gain    | BASIS    |
| PD4107       | CAMTA1 | cna | gain    | BASIS    |
| PD4826       | CAMTA1 | cna | gain    | BASIS    |
| PD5945       | CAMTA1 | cna | gain    | BASIS    |
| PD6406       | CAMTA1 | cna | hetloss | BASIS    |
| PD7067       | CAMTA1 | cna | gain    | BASIS    |
| PD7215       | CAMTA1 | cna | gain    | BASIS    |
| PD8621       | CAMTA1 | cna | gain    | BASIS    |
| PD8980       | CAMTA1 | cna | hetloss | BASIS    |
| PD9004       | CAMTA1 | cna | hetloss | BASIS    |
| TCGA-AN-A0XU | CBFB   | cna | hetloss | TCGA     |
| TCGA-AO-A0JL | CBFB   | cna | gain    | TCGA     |
| TCGA-BH-A0C0 | CBFB   | cna | hetloss | TCGA     |
| TCGA-C8-A12L | CBFB   | cna | gain    | TCGA     |
| TCGA-D8-A27M | CBFB   | cna | hetloss | TCGA     |



|              |          |     |         |          |
|--------------|----------|-----|---------|----------|
| TCGA-E2-A1L7 | CBFB     | cna | hetloss | TCGA     |
| TCGA-E9-A1NC | CBFB     | cna | hetloss | TCGA     |
| TCGA-LL-A5YP | CBFB     | cna | gain    | TCGA     |
| MB-0346      | CBFB     | cna | gain    | METABRIC |
| MB-5107      | CBFB     | cna | hetloss | METABRIC |
| MB-6271      | CBFB     | cna | hetloss | METABRIC |
| MB-7032      | CBFB     | cna | gain    | METABRIC |
| MB-7048      | CBFB     | cna | hetloss | METABRIC |
| MB-0420      | CBFB     | cna | hetloss | METABRIC |
| MTS-T0064    | CBFB     | cna | hetloss | METABRIC |
| PD10014      | CBFB     | cna | hetloss | BASIS    |
| PD11327      | CBFB     | cna | homdel  | BASIS    |
| PD11742      | CBFB     | cna | hetloss | BASIS    |
| PD13296      | CBFB     | cna | hetloss | BASIS    |
| PD13297      | CBFB     | cna | hetloss | BASIS    |
| PD13299      | CBFB     | cna | gain    | BASIS    |
| PD14442      | CBFB     | cna | hetloss | BASIS    |
| PD23562      | CBFB     | cna | gain    | BASIS    |
| PD24186      | CBFB     | cna | gain    | BASIS    |
| PD24202      | CBFB     | cna | gain    | BASIS    |
| PD24206      | CBFB     | cna | gain    | BASIS    |
| PD3905       | CBFB     | cna | gain    | BASIS    |
| PD4005       | CBFB     | cna | hetloss | BASIS    |
| PD4967       | CBFB     | cna | homdel  | BASIS    |
| PD5945       | CBFB     | cna | gain    | BASIS    |
| PD5948       | CBFB     | cna | hetloss | BASIS    |
| PD7215       | CBFB     | cna | gain    | BASIS    |
| PD8980       | CBFB     | cna | hetloss | BASIS    |
| PD9585       | CBFB     | cna | hetloss | BASIS    |
| PD9702       | CBFB     | cna | gain    | BASIS    |
| TCGA-AN-A0XU | CCNB1IP1 | cna | gain    | TCGA     |
| TCGA-AO-A0JL | CCNB1IP1 | cna | amp     | TCGA     |
| TCGA-BH-A0AW | CCNB1IP1 | cna | hetloss | TCGA     |
| TCGA-BH-A1FU | CCNB1IP1 | cna | gain    | TCGA     |
| TCGA-D8-A27M | CCNB1IP1 | cna | gain    | TCGA     |
| TCGA-LL-A5YP | CCNB1IP1 | cna | hetloss | TCGA     |
| MB-5070      | CCNB1IP1 | cna | hetloss | METABRIC |
| MB-6060      | CCNB1IP1 | cna | gain    | METABRIC |
| MB-7048      | CCNB1IP1 | cna | gain    | METABRIC |
| PD11327      | CCNB1IP1 | cna | homdel  | BASIS    |
| PD13296      | CCNB1IP1 | cna | gain    | BASIS    |
| PD13299      | CCNB1IP1 | cna | gain    | BASIS    |
| PD22355      | CCNB1IP1 | cna | hetloss | BASIS    |
| PD23574      | CCNB1IP1 | cna | gain    | BASIS    |
| PD23578      | CCNB1IP1 | cna | hetloss | BASIS    |
| PD24186      | CCNB1IP1 | cna | gain    | BASIS    |
| PD24202      | CCNB1IP1 | cna | hetloss | BASIS    |

|              |          |     |         |          |
|--------------|----------|-----|---------|----------|
| PD24206      | CCNB1IP1 | cna | gain    | BASIS    |
| PD24337      | CCNB1IP1 | cna | hetloss | BASIS    |
| PD3890       | CCNB1IP1 | cna | hetloss | BASIS    |
| PD3905       | CCNB1IP1 | cna | amp     | BASIS    |
| PD4005       | CCNB1IP1 | cna | hetloss | BASIS    |
| PD4107       | CCNB1IP1 | cna | gain    | BASIS    |
| PD4967       | CCNB1IP1 | cna | hetloss | BASIS    |
| PD5930       | CCNB1IP1 | cna | hetloss | BASIS    |
| PD5935       | CCNB1IP1 | cna | gain    | BASIS    |
| PD5945       | CCNB1IP1 | cna | amp     | BASIS    |
| PD5948       | CCNB1IP1 | cna | gain    | BASIS    |
| PD6406       | CCNB1IP1 | cna | hetloss | BASIS    |
| PD6731       | CCNB1IP1 | cna | hetloss | BASIS    |
| PD7215       | CCNB1IP1 | cna | gain    | BASIS    |
| PD8621       | CCNB1IP1 | cna | gain    | BASIS    |
| PD8980       | CCNB1IP1 | cna | gain    | BASIS    |
| PD9004       | CCNB1IP1 | cna | gain    | BASIS    |
| PD9702       | CCNB1IP1 | cna | gain    | BASIS    |
| TCGA-A2-A25B | CNRIP1   | cna | hetloss | TCGA     |
| TCGA-AN-A0XU | CNRIP1   | cna | gain    | TCGA     |
| TCGA-AO-A0JL | CNRIP1   | cna | gain    | TCGA     |
| TCGA-BH-A0AW | CNRIP1   | cna | gain    | TCGA     |
| TCGA-BH-A0C0 | CNRIP1   | cna | gain    | TCGA     |
| TCGA-D8-A27M | CNRIP1   | cna | gain    | TCGA     |
| TCGA-E9-A1NC | CNRIP1   | cna | gain    | TCGA     |
| TCGA-LL-A5YP | CNRIP1   | cna | gain    | TCGA     |
| MB-5070      | CNRIP1   | cna | hetloss | METABRIC |
| MB-6098      | CNRIP1   | cna | gain    | METABRIC |
| MB-6271      | CNRIP1   | cna | hetloss | METABRIC |
| MB-7038      | CNRIP1   | cna | gain    | METABRIC |
| PD11327      | CNRIP1   | cna | gain    | BASIS    |
| PD13296      | CNRIP1   | cna | hetloss | BASIS    |
| PD13297      | CNRIP1   | cna | gain    | BASIS    |
| PD13299      | CNRIP1   | cna | gain    | BASIS    |
| PD23562      | CNRIP1   | cna | gain    | BASIS    |
| PD23578      | CNRIP1   | cna | gain    | BASIS    |
| PD24186      | CNRIP1   | cna | gain    | BASIS    |
| PD24202      | CNRIP1   | cna | gain    | BASIS    |
| PD24206      | CNRIP1   | cna | gain    | BASIS    |
| PD3890       | CNRIP1   | cna | hetloss | BASIS    |
| PD3905       | CNRIP1   | cna | gain    | BASIS    |
| PD4006       | CNRIP1   | cna | amp     | BASIS    |
| PD4107       | CNRIP1   | cna | hetloss | BASIS    |
| PD5930       | CNRIP1   | cna | gain    | BASIS    |
| PD5935       | CNRIP1   | cna | gain    | BASIS    |
| PD5945       | CNRIP1   | cna | gain    | BASIS    |
| PD5948       | CNRIP1   | cna | gain    | BASIS    |

|              |        |     |         |          |
|--------------|--------|-----|---------|----------|
| PD7067       | CNRIP1 | cna | gain    | BASIS    |
| PD7215       | CNRIP1 | cna | gain    | BASIS    |
| PD8621       | CNRIP1 | cna | gain    | BASIS    |
| PD9004       | CNRIP1 | cna | gain    | BASIS    |
| PD9585       | CNRIP1 | cna | gain    | BASIS    |
| PD9702       | CNRIP1 | cna | gain    | BASIS    |
| TCGA-A2-A25B | CSF3R  | cna | hetloss | TCGA     |
| TCGA-AN-A0XU | CSF3R  | cna | hetloss | TCGA     |
| TCGA-AO-A0JL | CSF3R  | cna | hetloss | TCGA     |
| TCGA-BH-A0AW | CSF3R  | cna | gain    | TCGA     |
| TCGA-BH-A0C0 | CSF3R  | cna | gain    | TCGA     |
| TCGA-BH-A1FU | CSF3R  | cna | gain    | TCGA     |
| TCGA-C8-A12L | CSF3R  | cna | hetloss | TCGA     |
| TCGA-D8-A27M | CSF3R  | cna | gain    | TCGA     |
| TCGA-E2-A1L7 | CSF3R  | cna | gain    | TCGA     |
| TCGA-LL-A5YP | CSF3R  | cna | gain    | TCGA     |
| MB-0346      | CSF3R  | cna | hetloss | METABRIC |
| MB-5465      | CSF3R  | cna | hetloss | METABRIC |
| MB-6060      | CSF3R  | cna | hetloss | METABRIC |
| MB-6098      | CSF3R  | cna | hetloss | METABRIC |
| MB-7038      | CSF3R  | cna | gain    | METABRIC |
| MB-0420      | CSF3R  | cna | hetloss | METABRIC |
| PD10014      | CSF3R  | cna | gain    | BASIS    |
| PD13296      | CSF3R  | cna | gain    | BASIS    |
| PD13299      | CSF3R  | cna | gain    | BASIS    |
| PD24186      | CSF3R  | cna | gain    | BASIS    |
| PD24206      | CSF3R  | cna | gain    | BASIS    |
| PD24337      | CSF3R  | cna | hetloss | BASIS    |
| PD3905       | CSF3R  | cna | gain    | BASIS    |
| PD4006       | CSF3R  | cna | gain    | BASIS    |
| PD4107       | CSF3R  | cna | gain    | BASIS    |
| PD4826       | CSF3R  | cna | gain    | BASIS    |
| PD5935       | CSF3R  | cna | gain    | BASIS    |
| PD5945       | CSF3R  | cna | amp     | BASIS    |
| PD7067       | CSF3R  | cna | gain    | BASIS    |
| PD7215       | CSF3R  | cna | gain    | BASIS    |
| PD8621       | CSF3R  | cna | gain    | BASIS    |
| PD8980       | CSF3R  | cna | gain    | BASIS    |
| PD9004       | CSF3R  | cna | hetloss | BASIS    |
| PD9585       | CSF3R  | cna | hetloss | BASIS    |
| PD9702       | CSF3R  | cna | gain    | BASIS    |
| TCGA-AN-A0XU | CTCF   | cna | hetloss | TCGA     |
| TCGA-AO-A0JL | CTCF   | cna | gain    | TCGA     |
| TCGA-BH-A0AW | CTCF   | cna | hetloss | TCGA     |
| TCGA-BH-A0C0 | CTCF   | cna | hetloss | TCGA     |
| TCGA-C8-A12L | CTCF   | cna | gain    | TCGA     |
| TCGA-D8-A27M | CTCF   | cna | hetloss | TCGA     |

|              |       |     |         |          |
|--------------|-------|-----|---------|----------|
| TCGA-E2-A1L7 | CTCF  | cna | hetloss | TCGA     |
| TCGA-E9-A1NC | CTCF  | cna | hetloss | TCGA     |
| TCGA-LL-A5YP | CTCF  | cna | gain    | TCGA     |
| MB-0346      | CTCF  | cna | gain    | METABRIC |
| MB-5107      | CTCF  | cna | hetloss | METABRIC |
| MB-6271      | CTCF  | cna | hetloss | METABRIC |
| MB-7032      | CTCF  | cna | gain    | METABRIC |
| MB-7048      | CTCF  | cna | hetloss | METABRIC |
| MB-0420      | CTCF  | cna | hetloss | METABRIC |
| MTS-T0064    | CTCF  | cna | hetloss | METABRIC |
| PD10014      | CTCF  | cna | hetloss | BASIS    |
| PD11327      | CTCF  | cna | homdel  | BASIS    |
| PD11742      | CTCF  | cna | hetloss | BASIS    |
| PD13297      | CTCF  | cna | hetloss | BASIS    |
| PD13299      | CTCF  | cna | gain    | BASIS    |
| PD14442      | CTCF  | cna | hetloss | BASIS    |
| PD23562      | CTCF  | cna | gain    | BASIS    |
| PD24186      | CTCF  | cna | gain    | BASIS    |
| PD24202      | CTCF  | cna | hetloss | BASIS    |
| PD24206      | CTCF  | cna | hetloss | BASIS    |
| PD3905       | CTCF  | cna | gain    | BASIS    |
| PD4005       | CTCF  | cna | hetloss | BASIS    |
| PD4967       | CTCF  | cna | homdel  | BASIS    |
| PD5945       | CTCF  | cna | gain    | BASIS    |
| PD5948       | CTCF  | cna | hetloss | BASIS    |
| PD7215       | CTCF  | cna | gain    | BASIS    |
| PD8980       | CTCF  | cna | hetloss | BASIS    |
| PD9585       | CTCF  | cna | hetloss | BASIS    |
| PD9702       | CTCF  | cna | gain    | BASIS    |
| TCGA-AN-A0XU | CXCR4 | cna | gain    | TCGA     |
| TCGA-AO-A0JL | CXCR4 | cna | gain    | TCGA     |
| TCGA-D8-A27M | CXCR4 | cna | gain    | TCGA     |
| TCGA-E9-A1NC | CXCR4 | cna | gain    | TCGA     |
| TCGA-LL-A5YP | CXCR4 | cna | hetloss | TCGA     |
| MB-2827      | CXCR4 | cna | hetloss | METABRIC |
| MB-5107      | CXCR4 | cna | hetloss | METABRIC |
| MB-5465      | CXCR4 | cna | gain    | METABRIC |
| MB-6098      | CXCR4 | cna | hetloss | METABRIC |
| MB-6271      | CXCR4 | cna | hetloss | METABRIC |
| PD11327      | CXCR4 | cna | gain    | BASIS    |
| PD11742      | CXCR4 | cna | hetloss | BASIS    |
| PD13296      | CXCR4 | cna | hetloss | BASIS    |
| PD13297      | CXCR4 | cna | hetloss | BASIS    |
| PD13299      | CXCR4 | cna | gain    | BASIS    |
| PD22355      | CXCR4 | cna | hetloss | BASIS    |
| PD23574      | CXCR4 | cna | gain    | BASIS    |
| PD23578      | CXCR4 | cna | hetloss | BASIS    |

|              |       |     |         |          |
|--------------|-------|-----|---------|----------|
| PD24186      | CXCR4 | cna | gain    | BASIS    |
| PD24202      | CXCR4 | cna | hetloss | BASIS    |
| PD24206      | CXCR4 | cna | gain    | BASIS    |
| PD3890       | CXCR4 | cna | hetloss | BASIS    |
| PD3905       | CXCR4 | cna | gain    | BASIS    |
| PD4005       | CXCR4 | cna | hetloss | BASIS    |
| PD4006       | CXCR4 | cna | homdel  | BASIS    |
| PD4967       | CXCR4 | cna | hetloss | BASIS    |
| PD5935       | CXCR4 | cna | gain    | BASIS    |
| PD5945       | CXCR4 | cna | gain    | BASIS    |
| PD5948       | CXCR4 | cna | gain    | BASIS    |
| PD6406       | CXCR4 | cna | hetloss | BASIS    |
| PD6413       | CXCR4 | cna | hetloss | BASIS    |
| PD7215       | CXCR4 | cna | gain    | BASIS    |
| PD8621       | CXCR4 | cna | hetloss | BASIS    |
| PD9004       | CXCR4 | cna | hetloss | BASIS    |
| PD9702       | CXCR4 | cna | gain    | BASIS    |
| TCGA-A2-A25B | DKK3  | cna | hetloss | TCGA     |
| TCGA-AN-A0XU | DKK3  | cna | hetloss | TCGA     |
| TCGA-AO-A0JL | DKK3  | cna | hetloss | TCGA     |
| TCGA-BH-A0C0 | DKK3  | cna | hetloss | TCGA     |
| TCGA-C8-A12L | DKK3  | cna | hetloss | TCGA     |
| TCGA-E2-A1L7 | DKK3  | cna | hetloss | TCGA     |
| TCGA-E9-A1NC | DKK3  | cna | hetloss | TCGA     |
| TCGA-LL-A5YP | DKK3  | cna | hetloss | TCGA     |
| MB-0346      | DKK3  | cna | hetloss | METABRIC |
| MB-6060      | DKK3  | cna | hetloss | METABRIC |
| MB-6271      | DKK3  | cna | gain    | METABRIC |
| MB-7048      | DKK3  | cna | hetloss | METABRIC |
| PD10014      | DKK3  | cna | hetloss | BASIS    |
| PD11327      | DKK3  | cna | gain    | BASIS    |
| PD11742      | DKK3  | cna | hetloss | BASIS    |
| PD13296      | DKK3  | cna | hetloss | BASIS    |
| PD13297      | DKK3  | cna | hetloss | BASIS    |
| PD23562      | DKK3  | cna | gain    | BASIS    |
| PD23574      | DKK3  | cna | gain    | BASIS    |
| PD24206      | DKK3  | cna | gain    | BASIS    |
| PD3890       | DKK3  | cna | hetloss | BASIS    |
| PD3905       | DKK3  | cna | gain    | BASIS    |
| PD4005       | DKK3  | cna | hetloss | BASIS    |
| PD4107       | DKK3  | cna | gain    | BASIS    |
| PD4826       | DKK3  | cna | gain    | BASIS    |
| PD5935       | DKK3  | cna | gain    | BASIS    |
| PD5945       | DKK3  | cna | amp     | BASIS    |
| PD5948       | DKK3  | cna | gain    | BASIS    |
| PD6406       | DKK3  | cna | hetloss | BASIS    |
| PD6413       | DKK3  | cna | hetloss | BASIS    |

|              |       |     |         |          |
|--------------|-------|-----|---------|----------|
| PD6731       | DKK3  | cna | hetloss | BASIS    |
| PD7215       | DKK3  | cna | hetloss | BASIS    |
| PD8980       | DKK3  | cna | hetloss | BASIS    |
| PD9585       | DKK3  | cna | hetloss | BASIS    |
| PD9702       | DKK3  | cna | gain    | BASIS    |
| TCGA-A2-A25B | DKK4  | cna | hetloss | TCGA     |
| TCGA-AO-A0JL | DKK4  | cna | amp     | TCGA     |
| TCGA-BH-A0C0 | DKK4  | cna | gain    | TCGA     |
| TCGA-BH-A1FU | DKK4  | cna | homdel  | TCGA     |
| TCGA-D8-A27M | DKK4  | cna | amp     | TCGA     |
| TCGA-E2-A1L7 | DKK4  | cna | hetloss | TCGA     |
| TCGA-LL-A5YP | DKK4  | cna | amp     | TCGA     |
| MB-0346      | DKK4  | cna | hetloss | METABRIC |
| MB-2827      | DKK4  | cna | hetloss | METABRIC |
| MB-6060      | DKK4  | cna | amp     | METABRIC |
| MB-7038      | DKK4  | cna | hetloss | METABRIC |
| PD11327      | DKK4  | cna | homdel  | BASIS    |
| PD13296      | DKK4  | cna | hetloss | BASIS    |
| PD13299      | DKK4  | cna | gain    | BASIS    |
| PD13771      | DKK4  | cna | amp     | BASIS    |
| PD23562      | DKK4  | cna | gain    | BASIS    |
| PD23574      | DKK4  | cna | gain    | BASIS    |
| PD23578      | DKK4  | cna | hetloss | BASIS    |
| PD24186      | DKK4  | cna | gain    | BASIS    |
| PD24202      | DKK4  | cna | hetloss | BASIS    |
| PD24206      | DKK4  | cna | amp     | BASIS    |
| PD3905       | DKK4  | cna | gain    | BASIS    |
| PD4006       | DKK4  | cna | gain    | BASIS    |
| PD4107       | DKK4  | cna | gain    | BASIS    |
| PD4826       | DKK4  | cna | hetloss | BASIS    |
| PD5930       | DKK4  | cna | gain    | BASIS    |
| PD5935       | DKK4  | cna | gain    | BASIS    |
| PD5945       | DKK4  | cna | amp     | BASIS    |
| PD5948       | DKK4  | cna | hetloss | BASIS    |
| PD7067       | DKK4  | cna | amp     | BASIS    |
| PD7215       | DKK4  | cna | amp     | BASIS    |
| PD8980       | DKK4  | cna | amp     | BASIS    |
| PD9004       | DKK4  | cna | amp     | BASIS    |
| PD9585       | DKK4  | cna | gain    | BASIS    |
| PD9702       | DKK4  | cna | gain    | BASIS    |
| TCGA-AO-A0JL | DNMT1 | cna | gain    | TCGA     |
| TCGA-BH-A0C0 | DNMT1 | cna | gain    | TCGA     |
| TCGA-BH-A1FU | DNMT1 | cna | hetloss | TCGA     |
| TCGA-C8-A12L | DNMT1 | cna | gain    | TCGA     |
| TCGA-D8-A27M | DNMT1 | cna | hetloss | TCGA     |
| TCGA-EW-A10X | DNMT1 | cna | hetloss | TCGA     |
| TCGA-LL-A5YP | DNMT1 | cna | hetloss | TCGA     |

|                   |        |     |         |            |
|-------------------|--------|-----|---------|------------|
| MB-0346           | DNMT1  | cna | hetloss | METABRIC   |
| MB-2827           | DNMT1  | cna | hetloss | METABRIC   |
| MB-5070           | DNMT1  | cna | hetloss | METABRIC   |
| MB-5465           | DNMT1  | cna | gain    | METABRIC   |
| MB-6098           | DNMT1  | cna | hetloss | METABRIC   |
| MB-7038           | DNMT1  | cna | hetloss | METABRIC   |
| MB-0420           | DNMT1  | cna | hetloss | METABRIC   |
| P-0009557-T01-IM5 | DNMT1  | cna | amp     | MSK-IMPACT |
| PD11327           | DNMT1  | cna | homdel  | BASIS      |
| PD13771           | DNMT1  | cna | gain    | BASIS      |
| PD14442           | DNMT1  | cna | hetloss | BASIS      |
| PD23562           | DNMT1  | cna | gain    | BASIS      |
| PD23574           | DNMT1  | cna | gain    | BASIS      |
| PD24206           | DNMT1  | cna | homdel  | BASIS      |
| PD3905            | DNMT1  | cna | gain    | BASIS      |
| PD4006            | DNMT1  | cna | gain    | BASIS      |
| PD4107            | DNMT1  | cna | gain    | BASIS      |
| PD4826            | DNMT1  | cna | gain    | BASIS      |
| PD4967            | DNMT1  | cna | hetloss | BASIS      |
| PD5930            | DNMT1  | cna | gain    | BASIS      |
| PD5935            | DNMT1  | cna | gain    | BASIS      |
| PD5945            | DNMT1  | cna | amp     | BASIS      |
| PD5948            | DNMT1  | cna | gain    | BASIS      |
| PD6406            | DNMT1  | cna | amp     | BASIS      |
| PD7067            | DNMT1  | cna | gain    | BASIS      |
| PD7215            | DNMT1  | cna | amp     | BASIS      |
| PD8621            | DNMT1  | cna | gain    | BASIS      |
| PD9702            | DNMT1  | cna | gain    | BASIS      |
| TCGA-A2-A25B      | EPHA10 | cna | hetloss | TCGA       |
| TCGA-AN-A0XU      | EPHA10 | cna | hetloss | TCGA       |
| TCGA-AO-A0JL      | EPHA10 | cna | hetloss | TCGA       |
| TCGA-BH-A0AW      | EPHA10 | cna | gain    | TCGA       |
| TCGA-BH-A0C0      | EPHA10 | cna | gain    | TCGA       |
| TCGA-BH-A1FU      | EPHA10 | cna | gain    | TCGA       |
| TCGA-C8-A12L      | EPHA10 | cna | hetloss | TCGA       |
| TCGA-D8-A27M      | EPHA10 | cna | gain    | TCGA       |
| TCGA-E2-A1L7      | EPHA10 | cna | gain    | TCGA       |
| TCGA-LL-A5YP      | EPHA10 | cna | gain    | TCGA       |
| MB-0346           | EPHA10 | cna | hetloss | METABRIC   |
| MB-5465           | EPHA10 | cna | hetloss | METABRIC   |
| MB-6060           | EPHA10 | cna | hetloss | METABRIC   |
| MB-6098           | EPHA10 | cna | hetloss | METABRIC   |
| MB-7038           | EPHA10 | cna | gain    | METABRIC   |
| MB-0420           | EPHA10 | cna | hetloss | METABRIC   |
| PD10014           | EPHA10 | cna | gain    | BASIS      |
| PD13296           | EPHA10 | cna | gain    | BASIS      |
| PD13299           | EPHA10 | cna | gain    | BASIS      |

|              |        |     |         |          |
|--------------|--------|-----|---------|----------|
| PD24186      | EPHA10 | cna | gain    | BASIS    |
| PD24206      | EPHA10 | cna | gain    | BASIS    |
| PD24337      | EPHA10 | cna | hetloss | BASIS    |
| PD3905       | EPHA10 | cna | gain    | BASIS    |
| PD4006       | EPHA10 | cna | gain    | BASIS    |
| PD4107       | EPHA10 | cna | gain    | BASIS    |
| PD4826       | EPHA10 | cna | gain    | BASIS    |
| PD5935       | EPHA10 | cna | gain    | BASIS    |
| PD5945       | EPHA10 | cna | amp     | BASIS    |
| PD5948       | EPHA10 | cna | gain    | BASIS    |
| PD7067       | EPHA10 | cna | gain    | BASIS    |
| PD7215       | EPHA10 | cna | gain    | BASIS    |
| PD8621       | EPHA10 | cna | gain    | BASIS    |
| PD8980       | EPHA10 | cna | gain    | BASIS    |
| PD9004       | EPHA10 | cna | hetloss | BASIS    |
| PD9702       | EPHA10 | cna | gain    | BASIS    |
| TCGA-A2-A25B | EPHA7  | cna | hetloss | TCGA     |
| TCGA-AN-A0XU | EPHA7  | cna | amp     | TCGA     |
| TCGA-AO-A0JL | EPHA7  | cna | hetloss | TCGA     |
| TCGA-BH-A0AW | EPHA7  | cna | gain    | TCGA     |
| TCGA-BH-A18R | EPHA7  | cna | homdel  | TCGA     |
| TCGA-C8-A12L | EPHA7  | cna | gain    | TCGA     |
| MB-2827      | EPHA7  | cna | amp     | METABRIC |
| MB-5107      | EPHA7  | cna | hetloss | METABRIC |
| MB-6060      | EPHA7  | cna | hetloss | METABRIC |
| MB-6098      | EPHA7  | cna | hetloss | METABRIC |
| MB-7032      | EPHA7  | cna | hetloss | METABRIC |
| MB-7038      | EPHA7  | cna | gain    | METABRIC |
| MB-7048      | EPHA7  | cna | hetloss | METABRIC |
| PD11327      | EPHA7  | cna | gain    | BASIS    |
| PD13299      | EPHA7  | cna | gain    | BASIS    |
| PD13771      | EPHA7  | cna | hetloss | BASIS    |
| PD23562      | EPHA7  | cna | gain    | BASIS    |
| PD23574      | EPHA7  | cna | gain    | BASIS    |
| PD24186      | EPHA7  | cna | gain    | BASIS    |
| PD24206      | EPHA7  | cna | gain    | BASIS    |
| PD24337      | EPHA7  | cna | hetloss | BASIS    |
| PD3905       | EPHA7  | cna | amp     | BASIS    |
| PD4006       | EPHA7  | cna | gain    | BASIS    |
| PD4107       | EPHA7  | cna | hetloss | BASIS    |
| PD4826       | EPHA7  | cna | gain    | BASIS    |
| PD5935       | EPHA7  | cna | gain    | BASIS    |
| PD5945       | EPHA7  | cna | amp     | BASIS    |
| PD6731       | EPHA7  | cna | hetloss | BASIS    |
| PD7067       | EPHA7  | cna | amp     | BASIS    |
| PD7215       | EPHA7  | cna | gain    | BASIS    |
| PD8621       | EPHA7  | cna | gain    | BASIS    |



|              |        |     |         |          |
|--------------|--------|-----|---------|----------|
| PD8980       | EPHA7  | cna | gain    | BASIS    |
| PD9004       | EPHA7  | cna | gain    | BASIS    |
| PD9585       | EPHA7  | cna | hetloss | BASIS    |
| PD9702       | EPHA7  | cna | gain    | BASIS    |
| TCGA-AN-A0XU | FANCD2 | cna | gain    | TCGA     |
| TCGA-BH-A0C0 | FANCD2 | cna | gain    | TCGA     |
| TCGA-BH-A18R | FANCD2 | cna | gain    | TCGA     |
| TCGA-BH-A1FU | FANCD2 | cna | hetloss | TCGA     |
| TCGA-D8-A27M | FANCD2 | cna | hetloss | TCGA     |
| TCGA-E9-A1NC | FANCD2 | cna | hetloss | TCGA     |
| TCGA-LL-A5YP | FANCD2 | cna | amp     | TCGA     |
| MB-7038      | FANCD2 | cna | hetloss | METABRIC |
| MB-7048      | FANCD2 | cna | hetloss | METABRIC |
| MB-0420      | FANCD2 | cna | hetloss | METABRIC |
| PD10014      | FANCD2 | cna | hetloss | BASIS    |
| PD11327      | FANCD2 | cna | gain    | BASIS    |
| PD11742      | FANCD2 | cna | gain    | BASIS    |
| PD13296      | FANCD2 | cna | gain    | BASIS    |
| PD13299      | FANCD2 | cna | gain    | BASIS    |
| PD13771      | FANCD2 | cna | gain    | BASIS    |
| PD23561      | FANCD2 | cna | hetloss | BASIS    |
| PD23562      | FANCD2 | cna | gain    | BASIS    |
| PD23574      | FANCD2 | cna | gain    | BASIS    |
| PD23578      | FANCD2 | cna | gain    | BASIS    |
| PD24186      | FANCD2 | cna | amp     | BASIS    |
| PD24206      | FANCD2 | cna | gain    | BASIS    |
| PD3905       | FANCD2 | cna | gain    | BASIS    |
| PD4006       | FANCD2 | cna | gain    | BASIS    |
| PD4826       | FANCD2 | cna | gain    | BASIS    |
| PD5945       | FANCD2 | cna | amp     | BASIS    |
| PD5948       | FANCD2 | cna | gain    | BASIS    |
| PD6406       | FANCD2 | cna | hetloss | BASIS    |
| PD6731       | FANCD2 | cna | hetloss | BASIS    |
| PD7067       | FANCD2 | cna | gain    | BASIS    |
| PD7215       | FANCD2 | cna | gain    | BASIS    |
| PD8980       | FANCD2 | cna | gain    | BASIS    |
| PD9004       | FANCD2 | cna | gain    | BASIS    |
| PD9585       | FANCD2 | cna | hetloss | BASIS    |
| PD9702       | FANCD2 | cna | gain    | BASIS    |
| TCGA-A2-A25B | FAT3   | cna | hetloss | TCGA     |
| TCGA-AN-A0XU | FAT3   | cna | gain    | TCGA     |
| TCGA-AO-A0JL | FAT3   | cna | hetloss | TCGA     |
| TCGA-D8-A27M | FAT3   | cna | gain    | TCGA     |
| TCGA-EW-A10X | FAT3   | cna | homdel  | TCGA     |
| TCGA-LL-A5YP | FAT3   | cna | hetloss | TCGA     |
| MB-0346      | FAT3   | cna | hetloss | METABRIC |
| MB-5070      | FAT3   | cna | hetloss | METABRIC |

|              |       |     |         |          |
|--------------|-------|-----|---------|----------|
| MB-5107      | FAT3  | cna | amp     | METABRIC |
| MB-6271      | FAT3  | cna | hetloss | METABRIC |
| MB-7032      | FAT3  | cna | hetloss | METABRIC |
| MTS-T0064    | FAT3  | cna | gain    | METABRIC |
| PD10014      | FAT3  | cna | gain    | BASIS    |
| PD11327      | FAT3  | cna | gain    | BASIS    |
| PD11742      | FAT3  | cna | hetloss | BASIS    |
| PD13299      | FAT3  | cna | gain    | BASIS    |
| PD13771      | FAT3  | cna | hetloss | BASIS    |
| PD22355      | FAT3  | cna | hetloss | BASIS    |
| PD23574      | FAT3  | cna | gain    | BASIS    |
| PD23578      | FAT3  | cna | hetloss | BASIS    |
| PD24186      | FAT3  | cna | gain    | BASIS    |
| PD24206      | FAT3  | cna | gain    | BASIS    |
| PD24337      | FAT3  | cna | hetloss | BASIS    |
| PD3905       | FAT3  | cna | gain    | BASIS    |
| PD4006       | FAT3  | cna | hetloss | BASIS    |
| PD4107       | FAT3  | cna | hetloss | BASIS    |
| PD5935       | FAT3  | cna | gain    | BASIS    |
| PD5945       | FAT3  | cna | gain    | BASIS    |
| PD5948       | FAT3  | cna | gain    | BASIS    |
| PD6413       | FAT3  | cna | hetloss | BASIS    |
| PD7067       | FAT3  | cna | amp     | BASIS    |
| PD7215       | FAT3  | cna | gain    | BASIS    |
| PD8980       | FAT3  | cna | gain    | BASIS    |
| PD9585       | FAT3  | cna | hetloss | BASIS    |
| PD9702       | FAT3  | cna | gain    | BASIS    |
| TCGA-AN-A0XU | FGF10 | cna | gain    | TCGA     |
| TCGA-AO-A0JL | FGF10 | cna | gain    | TCGA     |
| TCGA-BH-A0C0 | FGF10 | cna | gain    | TCGA     |
| TCGA-BH-A1FU | FGF10 | cna | amp     | TCGA     |
| TCGA-E9-A1NC | FGF10 | cna | hetloss | TCGA     |
| TCGA-LL-A5YP | FGF10 | cna | amp     | TCGA     |
| MB-0346      | FGF10 | cna | gain    | METABRIC |
| MB-5070      | FGF10 | cna | gain    | METABRIC |
| MB-6060      | FGF10 | cna | amp     | METABRIC |
| MB-6098      | FGF10 | cna | gain    | METABRIC |
| PD10014      | FGF10 | cna | hetloss | BASIS    |
| PD11327      | FGF10 | cna | gain    | BASIS    |
| PD13296      | FGF10 | cna | gain    | BASIS    |
| PD13299      | FGF10 | cna | gain    | BASIS    |
| PD13771      | FGF10 | cna | gain    | BASIS    |
| PD23562      | FGF10 | cna | gain    | BASIS    |
| PD23574      | FGF10 | cna | gain    | BASIS    |
| PD24186      | FGF10 | cna | gain    | BASIS    |
| PD24206      | FGF10 | cna | gain    | BASIS    |
| PD24337      | FGF10 | cna | hetloss | BASIS    |

|              |       |     |         |          |
|--------------|-------|-----|---------|----------|
| PD3890       | FGF10 | cna | gain    | BASIS    |
| PD3905       | FGF10 | cna | gain    | BASIS    |
| PD4006       | FGF10 | cna | gain    | BASIS    |
| PD4107       | FGF10 | cna | gain    | BASIS    |
| PD4826       | FGF10 | cna | gain    | BASIS    |
| PD5930       | FGF10 | cna | gain    | BASIS    |
| PD5945       | FGF10 | cna | amp     | BASIS    |
| PD5948       | FGF10 | cna | gain    | BASIS    |
| PD6406       | FGF10 | cna | hetloss | BASIS    |
| PD6413       | FGF10 | cna | gain    | BASIS    |
| PD7215       | FGF10 | cna | amp     | BASIS    |
| PD8621       | FGF10 | cna | hetloss | BASIS    |
| PD8980       | FGF10 | cna | gain    | BASIS    |
| PD9004       | FGF10 | cna | gain    | BASIS    |
| PD9585       | FGF10 | cna | gain    | BASIS    |
| TCGA-A2-A25B | FOXA1 | cna | amp     | TCGA     |
| TCGA-AN-A0XU | FOXA1 | cna | hetloss | TCGA     |
| TCGA-AO-A0JL | FOXA1 | cna | hetloss | TCGA     |
| TCGA-BH-A0AW | FOXA1 | cna | hetloss | TCGA     |
| TCGA-BH-A1FU | FOXA1 | cna | gain    | TCGA     |
| TCGA-D8-A27M | FOXA1 | cna | hetloss | TCGA     |
| TCGA-LL-A5YP | FOXA1 | cna | hetloss | TCGA     |
| MB-5070      | FOXA1 | cna | hetloss | METABRIC |
| MB-5465      | FOXA1 | cna | hetloss | METABRIC |
| MB-6060      | FOXA1 | cna | gain    | METABRIC |
| PD10014      | FOXA1 | cna | hetloss | BASIS    |
| PD13297      | FOXA1 | cna | hetloss | BASIS    |
| PD22355      | FOXA1 | cna | hetloss | BASIS    |
| PD23578      | FOXA1 | cna | hetloss | BASIS    |
| PD24186      | FOXA1 | cna | gain    | BASIS    |
| PD24202      | FOXA1 | cna | hetloss | BASIS    |
| PD24206      | FOXA1 | cna | amp     | BASIS    |
| PD24337      | FOXA1 | cna | hetloss | BASIS    |
| PD3890       | FOXA1 | cna | hetloss | BASIS    |
| PD3905       | FOXA1 | cna | gain    | BASIS    |
| PD4005       | FOXA1 | cna | hetloss | BASIS    |
| PD4006       | FOXA1 | cna | hetloss | BASIS    |
| PD4107       | FOXA1 | cna | hetloss | BASIS    |
| PD4826       | FOXA1 | cna | gain    | BASIS    |
| PD5930       | FOXA1 | cna | hetloss | BASIS    |
| PD5945       | FOXA1 | cna | gain    | BASIS    |
| PD5948       | FOXA1 | cna | gain    | BASIS    |
| PD6406       | FOXA1 | cna | hetloss | BASIS    |
| PD7067       | FOXA1 | cna | gain    | BASIS    |
| PD7215       | FOXA1 | cna | gain    | BASIS    |
| PD8621       | FOXA1 | cna | gain    | BASIS    |
| PD8980       | FOXA1 | cna | gain    | BASIS    |

|              |       |     |         |          |
|--------------|-------|-----|---------|----------|
| PD9004       | FOXA1 | cna | gain    | BASIS    |
| PD9585       | FOXA1 | cna | gain    | BASIS    |
| PD9702       | FOXA1 | cna | gain    | BASIS    |
| TCGA-AN-A0XU | FOXP1 | cna | hetloss | TCGA     |
| TCGA-BH-A0C0 | FOXP1 | cna | hetloss | TCGA     |
| TCGA-BH-A18R | FOXP1 | cna | homdel  | TCGA     |
| TCGA-BH-A1FU | FOXP1 | cna | hetloss | TCGA     |
| TCGA-C8-A12L | FOXP1 | cna | hetloss | TCGA     |
| TCGA-D8-A27M | FOXP1 | cna | hetloss | TCGA     |
| TCGA-E2-A1L7 | FOXP1 | cna | homdel  | TCGA     |
| TCGA-E9-A1NC | FOXP1 | cna | hetloss | TCGA     |
| TCGA-LL-A5YP | FOXP1 | cna | gain    | TCGA     |
| MB-0346      | FOXP1 | cna | hetloss | METABRIC |
| MB-2827      | FOXP1 | cna | hetloss | METABRIC |
| MB-5465      | FOXP1 | cna | hetloss | METABRIC |
| MB-6098      | FOXP1 | cna | hetloss | METABRIC |
| MB-7048      | FOXP1 | cna | hetloss | METABRIC |
| MB-0420      | FOXP1 | cna | hetloss | METABRIC |
| MTS-T0064    | FOXP1 | cna | gain    | METABRIC |
| PD10014      | FOXP1 | cna | hetloss | BASIS    |
| PD11742      | FOXP1 | cna | hetloss | BASIS    |
| PD13296      | FOXP1 | cna | hetloss | BASIS    |
| PD13297      | FOXP1 | cna | hetloss | BASIS    |
| PD13299      | FOXP1 | cna | gain    | BASIS    |
| PD13771      | FOXP1 | cna | hetloss | BASIS    |
| PD23561      | FOXP1 | cna | hetloss | BASIS    |
| PD23574      | FOXP1 | cna | gain    | BASIS    |
| PD23578      | FOXP1 | cna | hetloss | BASIS    |
| PD24202      | FOXP1 | cna | hetloss | BASIS    |
| PD24337      | FOXP1 | cna | hetloss | BASIS    |
| PD3905       | FOXP1 | cna | gain    | BASIS    |
| PD4107       | FOXP1 | cna | gain    | BASIS    |
| PD5945       | FOXP1 | cna | gain    | BASIS    |
| PD6406       | FOXP1 | cna | hetloss | BASIS    |
| PD6413       | FOXP1 | cna | hetloss | BASIS    |
| PD6731       | FOXP1 | cna | hetloss | BASIS    |
| PD7067       | FOXP1 | cna | gain    | BASIS    |
| PD9585       | FOXP1 | cna | hetloss | BASIS    |
| TCGA-A2-A25B | FRS2  | cna | gain    | TCGA     |
| TCGA-AO-A0JL | FRS2  | cna | hetloss | TCGA     |
| TCGA-BH-A18R | FRS2  | cna | gain    | TCGA     |
| TCGA-BH-A1FU | FRS2  | cna | hetloss | TCGA     |
| TCGA-C8-A12L | FRS2  | cna | gain    | TCGA     |
| TCGA-E2-A1L7 | FRS2  | cna | hetloss | TCGA     |
| TCGA-LL-A5YP | FRS2  | cna | hetloss | TCGA     |
| MB-0346      | FRS2  | cna | gain    | METABRIC |
| MB-2827      | FRS2  | cna | hetloss | METABRIC |

|              |       |     |         |          |
|--------------|-------|-----|---------|----------|
| MB-5070      | FRS2  | cna | gain    | METABRIC |
| MB-5107      | FRS2  | cna | gain    | METABRIC |
| MB-5465      | FRS2  | cna | gain    | METABRIC |
| MB-6060      | FRS2  | cna | gain    | METABRIC |
| MB-6098      | FRS2  | cna | gain    | METABRIC |
| MTS-T0064    | FRS2  | cna | gain    | METABRIC |
| PD11327      | FRS2  | cna | homdel  | BASIS    |
| PD11742      | FRS2  | cna | gain    | BASIS    |
| PD22355      | FRS2  | cna | hetloss | BASIS    |
| PD23578      | FRS2  | cna | gain    | BASIS    |
| PD24186      | FRS2  | cna | gain    | BASIS    |
| PD24202      | FRS2  | cna | hetloss | BASIS    |
| PD24206      | FRS2  | cna | gain    | BASIS    |
| PD3890       | FRS2  | cna | hetloss | BASIS    |
| PD3905       | FRS2  | cna | gain    | BASIS    |
| PD4005       | FRS2  | cna | hetloss | BASIS    |
| PD4006       | FRS2  | cna | gain    | BASIS    |
| PD4826       | FRS2  | cna | gain    | BASIS    |
| PD5945       | FRS2  | cna | gain    | BASIS    |
| PD6406       | FRS2  | cna | hetloss | BASIS    |
| PD6413       | FRS2  | cna | hetloss | BASIS    |
| PD6731       | FRS2  | cna | hetloss | BASIS    |
| PD7067       | FRS2  | cna | gain    | BASIS    |
| PD8621       | FRS2  | cna | hetloss | BASIS    |
| PD9585       | FRS2  | cna | hetloss | BASIS    |
| PD9702       | FRS2  | cna | amp     | BASIS    |
| TCGA-AN-A0XU | FSTL3 | cna | hetloss | TCGA     |
| TCGA-AO-A0JL | FSTL3 | cna | gain    | TCGA     |
| TCGA-BH-A0C0 | FSTL3 | cna | gain    | TCGA     |
| TCGA-BH-A1FU | FSTL3 | cna | hetloss | TCGA     |
| TCGA-C8-A12L | FSTL3 | cna | hetloss | TCGA     |
| TCGA-D8-A27M | FSTL3 | cna | hetloss | TCGA     |
| TCGA-E9-A1NC | FSTL3 | cna | hetloss | TCGA     |
| TCGA-EW-A10X | FSTL3 | cna | hetloss | TCGA     |
| TCGA-LL-A5YP | FSTL3 | cna | hetloss | TCGA     |
| MB-0346      | FSTL3 | cna | gain    | METABRIC |
| MB-2827      | FSTL3 | cna | hetloss | METABRIC |
| MB-5070      | FSTL3 | cna | hetloss | METABRIC |
| MB-6098      | FSTL3 | cna | hetloss | METABRIC |
| MB-7038      | FSTL3 | cna | hetloss | METABRIC |
| MB-0420      | FSTL3 | cna | hetloss | METABRIC |
| PD11327      | FSTL3 | cna | amp     | BASIS    |
| PD11742      | FSTL3 | cna | hetloss | BASIS    |
| PD14442      | FSTL3 | cna | hetloss | BASIS    |
| PD22355      | FSTL3 | cna | hetloss | BASIS    |
| PD23578      | FSTL3 | cna | hetloss | BASIS    |
| PD24206      | FSTL3 | cna | hetloss | BASIS    |

|              |       |     |         |          |
|--------------|-------|-----|---------|----------|
| PD3890       | FSTL3 | cna | hetloss | BASIS    |
| PD3905       | FSTL3 | cna | gain    | BASIS    |
| PD4005       | FSTL3 | cna | gain    | BASIS    |
| PD4006       | FSTL3 | cna | gain    | BASIS    |
| PD4826       | FSTL3 | cna | hetloss | BASIS    |
| PD4967       | FSTL3 | cna | hetloss | BASIS    |
| PD5930       | FSTL3 | cna | gain    | BASIS    |
| PD5945       | FSTL3 | cna | gain    | BASIS    |
| PD5948       | FSTL3 | cna | gain    | BASIS    |
| PD7067       | FSTL3 | cna | gain    | BASIS    |
| PD8621       | FSTL3 | cna | gain    | BASIS    |
| PD8980       | FSTL3 | cna | gain    | BASIS    |
| PD9004       | FSTL3 | cna | hetloss | BASIS    |
| PD9585       | FSTL3 | cna | hetloss | BASIS    |
| TCGA-A2-A25B | GNA12 | cna | gain    | TCGA     |
| TCGA-AO-A0JL | GNA12 | cna | gain    | TCGA     |
| TCGA-BH-A0AW | GNA12 | cna | gain    | TCGA     |
| TCGA-BH-A0C0 | GNA12 | cna | hetloss | TCGA     |
| TCGA-C8-A12L | GNA12 | cna | gain    | TCGA     |
| TCGA-D8-A27M | GNA12 | cna | hetloss | TCGA     |
| TCGA-E2-A1L7 | GNA12 | cna | hetloss | TCGA     |
| TCGA-LL-A5YP | GNA12 | cna | homdel  | TCGA     |
| MB-0346      | GNA12 | cna | gain    | METABRIC |
| MB-5107      | GNA12 | cna | hetloss | METABRIC |
| MB-5465      | GNA12 | cna | gain    | METABRIC |
| MB-6098      | GNA12 | cna | hetloss | METABRIC |
| MB-7038      | GNA12 | cna | hetloss | METABRIC |
| MB-0420      | GNA12 | cna | hetloss | METABRIC |
| PD13296      | GNA12 | cna | gain    | BASIS    |
| PD13297      | GNA12 | cna | hetloss | BASIS    |
| PD13771      | GNA12 | cna | gain    | BASIS    |
| PD23574      | GNA12 | cna | gain    | BASIS    |
| PD24202      | GNA12 | cna | gain    | BASIS    |
| PD24206      | GNA12 | cna | gain    | BASIS    |
| PD24337      | GNA12 | cna | hetloss | BASIS    |
| PD3905       | GNA12 | cna | gain    | BASIS    |
| PD4006       | GNA12 | cna | gain    | BASIS    |
| PD4107       | GNA12 | cna | amp     | BASIS    |
| PD4826       | GNA12 | cna | gain    | BASIS    |
| PD5935       | GNA12 | cna | amp     | BASIS    |
| PD5945       | GNA12 | cna | amp     | BASIS    |
| PD6406       | GNA12 | cna | hetloss | BASIS    |
| PD6731       | GNA12 | cna | gain    | BASIS    |
| PD7067       | GNA12 | cna | amp     | BASIS    |
| PD7215       | GNA12 | cna | gain    | BASIS    |
| PD8621       | GNA12 | cna | gain    | BASIS    |
| PD8980       | GNA12 | cna | hetloss | BASIS    |

|                   |       |     |         |            |
|-------------------|-------|-----|---------|------------|
| PD9004            | GNA12 | cna | gain    | BASIS      |
| PD9702            | GNA12 | cna | gain    | BASIS      |
| TCGA-AO-A0JL      | GREM1 | cna | hetloss | TCGA       |
| TCGA-BH-A0AW      | GREM1 | cna | gain    | TCGA       |
| TCGA-BH-A0C0      | GREM1 | cna | hetloss | TCGA       |
| TCGA-C8-A12L      | GREM1 | cna | hetloss | TCGA       |
| TCGA-D8-A27M      | GREM1 | cna | hetloss | TCGA       |
| TCGA-E2-A1L7      | GREM1 | cna | hetloss | TCGA       |
| TCGA-LL-A5YP      | GREM1 | cna | hetloss | TCGA       |
| MB-2827           | GREM1 | cna | hetloss | METABRIC   |
| MB-5070           | GREM1 | cna | hetloss | METABRIC   |
| MB-5465           | GREM1 | cna | hetloss | METABRIC   |
| MB-6060           | GREM1 | cna | hetloss | METABRIC   |
| MB-6098           | GREM1 | cna | hetloss | METABRIC   |
| MB-7038           | GREM1 | cna | hetloss | METABRIC   |
| MB-0420           | GREM1 | cna | hetloss | METABRIC   |
| P-0009557-T01-IM5 | GREM1 | cna | homdel  | MSK-IMPACT |
| PD11327           | GREM1 | cna | hetloss | BASIS      |
| PD11742           | GREM1 | cna | hetloss | BASIS      |
| PD13297           | GREM1 | cna | hetloss | BASIS      |
| PD13299           | GREM1 | cna | hetloss | BASIS      |
| PD23574           | GREM1 | cna | hetloss | BASIS      |
| PD23578           | GREM1 | cna | hetloss | BASIS      |
| PD24202           | GREM1 | cna | hetloss | BASIS      |
| PD24206           | GREM1 | cna | gain    | BASIS      |
| PD3890            | GREM1 | cna | hetloss | BASIS      |
| PD3905            | GREM1 | cna | gain    | BASIS      |
| PD4005            | GREM1 | cna | homdel  | BASIS      |
| PD5930            | GREM1 | cna | hetloss | BASIS      |
| PD5935            | GREM1 | cna | gain    | BASIS      |
| PD5945            | GREM1 | cna | amp     | BASIS      |
| PD6413            | GREM1 | cna | hetloss | BASIS      |
| PD7067            | GREM1 | cna | gain    | BASIS      |
| PD7215            | GREM1 | cna | gain    | BASIS      |
| PD9004            | GREM1 | cna | hetloss | BASIS      |
| PD9585            | GREM1 | cna | hetloss | BASIS      |
| PD9702            | GREM1 | cna | gain    | BASIS      |
| TCGA-A2-A25B      | IDH2  | cna | amp     | TCGA       |
| TCGA-AN-A0XU      | IDH2  | cna | gain    | TCGA       |
| TCGA-AO-A0JL      | IDH2  | cna | hetloss | TCGA       |
| TCGA-BH-A0AW      | IDH2  | cna | hetloss | TCGA       |
| TCGA-BH-A0C0      | IDH2  | cna | gain    | TCGA       |
| TCGA-D8-A27M      | IDH2  | cna | hetloss | TCGA       |
| TCGA-E2-A1L7      | IDH2  | cna | gain    | TCGA       |
| TCGA-LL-A5YP      | IDH2  | cna | gain    | TCGA       |
| MB-0346           | IDH2  | cna | hetloss | METABRIC   |
| MB-5465           | IDH2  | cna | hetloss | METABRIC   |

|              |      |     |         |          |
|--------------|------|-----|---------|----------|
| MB-7038      | IDH2 | cna | gain    | METABRIC |
| MB-7048      | IDH2 | cna | amp     | METABRIC |
| MB-0420      | IDH2 | cna | gain    | METABRIC |
| MTS-T0064    | IDH2 | cna | amp     | METABRIC |
| PD10014      | IDH2 | cna | gain    | BASIS    |
| PD11742      | IDH2 | cna | hetloss | BASIS    |
| PD13299      | IDH2 | cna | gain    | BASIS    |
| PD23562      | IDH2 | cna | gain    | BASIS    |
| PD23574      | IDH2 | cna | gain    | BASIS    |
| PD23578      | IDH2 | cna | gain    | BASIS    |
| PD24202      | IDH2 | cna | hetloss | BASIS    |
| PD24206      | IDH2 | cna | hetloss | BASIS    |
| PD3890       | IDH2 | cna | hetloss | BASIS    |
| PD3905       | IDH2 | cna | gain    | BASIS    |
| PD4006       | IDH2 | cna | gain    | BASIS    |
| PD4107       | IDH2 | cna | gain    | BASIS    |
| PD4967       | IDH2 | cna | hetloss | BASIS    |
| PD5930       | IDH2 | cna | gain    | BASIS    |
| PD5945       | IDH2 | cna | gain    | BASIS    |
| PD6413       | IDH2 | cna | hetloss | BASIS    |
| PD7067       | IDH2 | cna | gain    | BASIS    |
| PD8621       | IDH2 | cna | gain    | BASIS    |
| PD8980       | IDH2 | cna | gain    | BASIS    |
| PD9585       | IDH2 | cna | hetloss | BASIS    |
| PD9702       | IDH2 | cna | gain    | BASIS    |
| TCGA-A2-A25B | IRF4 | cna | hetloss | TCGA     |
| TCGA-AN-A0XU | IRF4 | cna | hetloss | TCGA     |
| TCGA-AO-A0JL | IRF4 | cna | gain    | TCGA     |
| TCGA-C8-A12L | IRF4 | cna | gain    | TCGA     |
| TCGA-D8-A27M | IRF4 | cna | homdel  | TCGA     |
| TCGA-E2-A1L7 | IRF4 | cna | gain    | TCGA     |
| TCGA-E9-A1NC | IRF4 | cna | hetloss | TCGA     |
| TCGA-LL-A5YP | IRF4 | cna | gain    | TCGA     |
| MB-0346      | IRF4 | cna | hetloss | METABRIC |
| MB-5070      | IRF4 | cna | gain    | METABRIC |
| MB-6060      | IRF4 | cna | gain    | METABRIC |
| MB-6098      | IRF4 | cna | gain    | METABRIC |
| MB-6271      | IRF4 | cna | hetloss | METABRIC |
| MB-7038      | IRF4 | cna | hetloss | METABRIC |
| MB-0420      | IRF4 | cna | hetloss | METABRIC |
| MTS-T0064    | IRF4 | cna | homdel  | METABRIC |
| PD10014      | IRF4 | cna | hetloss | BASIS    |
| PD11327      | IRF4 | cna | amp     | BASIS    |
| PD13296      | IRF4 | cna | gain    | BASIS    |
| PD13297      | IRF4 | cna | gain    | BASIS    |
| PD13299      | IRF4 | cna | gain    | BASIS    |
| PD22355      | IRF4 | cna | gain    | BASIS    |



|              |       |     |         |          |
|--------------|-------|-----|---------|----------|
| PD23562      | IRF4  | cna | gain    | BASIS    |
| PD23578      | IRF4  | cna | gain    | BASIS    |
| PD24202      | IRF4  | cna | gain    | BASIS    |
| PD24206      | IRF4  | cna | gain    | BASIS    |
| PD3890       | IRF4  | cna | hetloss | BASIS    |
| PD3905       | IRF4  | cna | amp     | BASIS    |
| PD4005       | IRF4  | cna | hetloss | BASIS    |
| PD4107       | IRF4  | cna | gain    | BASIS    |
| PD4826       | IRF4  | cna | gain    | BASIS    |
| PD5935       | IRF4  | cna | gain    | BASIS    |
| PD5945       | IRF4  | cna | gain    | BASIS    |
| PD6731       | IRF4  | cna | hetloss | BASIS    |
| PD9702       | IRF4  | cna | gain    | BASIS    |
| TCGA-A2-A25B | KAT6A | cna | hetloss | TCGA     |
| TCGA-AO-A0JL | KAT6A | cna | amp     | TCGA     |
| TCGA-BH-A0C0 | KAT6A | cna | gain    | TCGA     |
| TCGA-BH-A1FU | KAT6A | cna | homdel  | TCGA     |
| TCGA-D8-A27M | KAT6A | cna | amp     | TCGA     |
| TCGA-E2-A1L7 | KAT6A | cna | hetloss | TCGA     |
| TCGA-LL-A5YP | KAT6A | cna | hetloss | TCGA     |
| MB-0346      | KAT6A | cna | hetloss | METABRIC |
| MB-2827      | KAT6A | cna | hetloss | METABRIC |
| MB-5465      | KAT6A | cna | hetloss | METABRIC |
| MB-6060      | KAT6A | cna | amp     | METABRIC |
| MB-7038      | KAT6A | cna | hetloss | METABRIC |
| PD11327      | KAT6A | cna | homdel  | BASIS    |
| PD13296      | KAT6A | cna | hetloss | BASIS    |
| PD13299      | KAT6A | cna | gain    | BASIS    |
| PD13771      | KAT6A | cna | amp     | BASIS    |
| PD23562      | KAT6A | cna | gain    | BASIS    |
| PD23574      | KAT6A | cna | gain    | BASIS    |
| PD23578      | KAT6A | cna | hetloss | BASIS    |
| PD24186      | KAT6A | cna | gain    | BASIS    |
| PD24202      | KAT6A | cna | hetloss | BASIS    |
| PD24206      | KAT6A | cna | amp     | BASIS    |
| PD3905       | KAT6A | cna | gain    | BASIS    |
| PD4006       | KAT6A | cna | gain    | BASIS    |
| PD4107       | KAT6A | cna | gain    | BASIS    |
| PD5930       | KAT6A | cna | gain    | BASIS    |
| PD5935       | KAT6A | cna | gain    | BASIS    |
| PD5945       | KAT6A | cna | amp     | BASIS    |
| PD5948       | KAT6A | cna | hetloss | BASIS    |
| PD7067       | KAT6A | cna | amp     | BASIS    |
| PD7215       | KAT6A | cna | amp     | BASIS    |
| PD8980       | KAT6A | cna | amp     | BASIS    |
| PD9004       | KAT6A | cna | amp     | BASIS    |
| PD9585       | KAT6A | cna | gain    | BASIS    |

|              |       |     |         |          |
|--------------|-------|-----|---------|----------|
| PD9702       | KAT6A | cna | gain    | BASIS    |
| TCGA-A2-A25B | LFNG  | cna | gain    | TCGA     |
| TCGA-AO-A0JL | LFNG  | cna | gain    | TCGA     |
| TCGA-BH-A0AW | LFNG  | cna | gain    | TCGA     |
| TCGA-BH-A0C0 | LFNG  | cna | hetloss | TCGA     |
| TCGA-C8-A12L | LFNG  | cna | gain    | TCGA     |
| TCGA-D8-A27M | LFNG  | cna | hetloss | TCGA     |
| TCGA-E2-A1L7 | LFNG  | cna | hetloss | TCGA     |
| TCGA-LL-A5YP | LFNG  | cna | homdel  | TCGA     |
| MB-0346      | LFNG  | cna | gain    | METABRIC |
| MB-5107      | LFNG  | cna | hetloss | METABRIC |
| MB-5465      | LFNG  | cna | gain    | METABRIC |
| MB-6098      | LFNG  | cna | hetloss | METABRIC |
| MB-7038      | LFNG  | cna | hetloss | METABRIC |
| MB-0420      | LFNG  | cna | hetloss | METABRIC |
| PD13296      | LFNG  | cna | gain    | BASIS    |
| PD13297      | LFNG  | cna | hetloss | BASIS    |
| PD13771      | LFNG  | cna | gain    | BASIS    |
| PD23574      | LFNG  | cna | gain    | BASIS    |
| PD24202      | LFNG  | cna | gain    | BASIS    |
| PD24206      | LFNG  | cna | gain    | BASIS    |
| PD24337      | LFNG  | cna | hetloss | BASIS    |
| PD3905       | LFNG  | cna | gain    | BASIS    |
| PD4006       | LFNG  | cna | gain    | BASIS    |
| PD4107       | LFNG  | cna | amp     | BASIS    |
| PD4826       | LFNG  | cna | gain    | BASIS    |
| PD5935       | LFNG  | cna | amp     | BASIS    |
| PD5945       | LFNG  | cna | amp     | BASIS    |
| PD6406       | LFNG  | cna | hetloss | BASIS    |
| PD6731       | LFNG  | cna | gain    | BASIS    |
| PD7067       | LFNG  | cna | amp     | BASIS    |
| PD7215       | LFNG  | cna | gain    | BASIS    |
| PD8621       | LFNG  | cna | gain    | BASIS    |
| PD8980       | LFNG  | cna | hetloss | BASIS    |
| PD9004       | LFNG  | cna | gain    | BASIS    |
| PD9702       | LFNG  | cna | gain    | BASIS    |
| TCGA-AO-A0JL | LYL1  | cna | gain    | TCGA     |
| TCGA-BH-A0C0 | LYL1  | cna | gain    | TCGA     |
| TCGA-BH-A1FU | LYL1  | cna | hetloss | TCGA     |
| TCGA-C8-A12L | LYL1  | cna | gain    | TCGA     |
| TCGA-D8-A27M | LYL1  | cna | hetloss | TCGA     |
| TCGA-EW-A10X | LYL1  | cna | hetloss | TCGA     |
| TCGA-LL-A5YP | LYL1  | cna | hetloss | TCGA     |
| MB-0346      | LYL1  | cna | hetloss | METABRIC |
| MB-2827      | LYL1  | cna | hetloss | METABRIC |
| MB-5465      | LYL1  | cna | gain    | METABRIC |
| MB-6098      | LYL1  | cna | hetloss | METABRIC |

|              |        |     |         |          |
|--------------|--------|-----|---------|----------|
| MB-7038      | LYL1   | cna | hetloss | METABRIC |
| MB-0420      | LYL1   | cna | hetloss | METABRIC |
| PD11742      | LYL1   | cna | hetloss | BASIS    |
| PD13297      | LYL1   | cna | gain    | BASIS    |
| PD14442      | LYL1   | cna | hetloss | BASIS    |
| PD23562      | LYL1   | cna | gain    | BASIS    |
| PD23574      | LYL1   | cna | gain    | BASIS    |
| PD24186      | LYL1   | cna | amp     | BASIS    |
| PD24206      | LYL1   | cna | homdel  | BASIS    |
| PD3905       | LYL1   | cna | gain    | BASIS    |
| PD4006       | LYL1   | cna | amp     | BASIS    |
| PD4107       | LYL1   | cna | gain    | BASIS    |
| PD4826       | LYL1   | cna | gain    | BASIS    |
| PD4967       | LYL1   | cna | hetloss | BASIS    |
| PD5930       | LYL1   | cna | gain    | BASIS    |
| PD5935       | LYL1   | cna | gain    | BASIS    |
| PD5945       | LYL1   | cna | amp     | BASIS    |
| PD5948       | LYL1   | cna | gain    | BASIS    |
| PD6406       | LYL1   | cna | gain    | BASIS    |
| PD6413       | LYL1   | cna | gain    | BASIS    |
| PD7067       | LYL1   | cna | gain    | BASIS    |
| PD7215       | LYL1   | cna | amp     | BASIS    |
| PD8621       | LYL1   | cna | gain    | BASIS    |
| PD9702       | LYL1   | cna | gain    | BASIS    |
| TCGA-A2-A25B | MAGED1 | cna | gain    | TCGA     |
| TCGA-AN-A0XU | MAGED1 | cna | hetloss | TCGA     |
| TCGA-AO-A0JL | MAGED1 | cna | gain    | TCGA     |
| TCGA-BH-A0AW | MAGED1 | cna | gain    | TCGA     |
| TCGA-E2-A1L7 | MAGED1 | cna | hetloss | TCGA     |
| TCGA-E9-A1NC | MAGED1 | cna | hetloss | TCGA     |
| MB-0346      | MAGED1 | cna | gain    | METABRIC |
| MB-2827      | MAGED1 | cna | hetloss | METABRIC |
| MB-5465      | MAGED1 | cna | gain    | METABRIC |
| MB-6098      | MAGED1 | cna | hetloss | METABRIC |
| MB-0420      | MAGED1 | cna | hetloss | METABRIC |
| PD10014      | MAGED1 | cna | hetloss | BASIS    |
| PD13296      | MAGED1 | cna | gain    | BASIS    |
| PD13299      | MAGED1 | cna | gain    | BASIS    |
| PD13771      | MAGED1 | cna | gain    | BASIS    |
| PD14442      | MAGED1 | cna | gain    | BASIS    |
| PD23562      | MAGED1 | cna | hetloss | BASIS    |
| PD23574      | MAGED1 | cna | gain    | BASIS    |
| PD24206      | MAGED1 | cna | amp     | BASIS    |
| PD3905       | MAGED1 | cna | gain    | BASIS    |
| PD4005       | MAGED1 | cna | hetloss | BASIS    |
| PD4006       | MAGED1 | cna | hetloss | BASIS    |
| PD4107       | MAGED1 | cna | gain    | BASIS    |

|              |        |     |         |          |
|--------------|--------|-----|---------|----------|
| PD4826       | MAGED1 | cna | gain    | BASIS    |
| PD4967       | MAGED1 | cna | gain    | BASIS    |
| PD5935       | MAGED1 | cna | gain    | BASIS    |
| PD5945       | MAGED1 | cna | gain    | BASIS    |
| PD5948       | MAGED1 | cna | gain    | BASIS    |
| PD6406       | MAGED1 | cna | gain    | BASIS    |
| PD6413       | MAGED1 | cna | gain    | BASIS    |
| PD7067       | MAGED1 | cna | gain    | BASIS    |
| PD7215       | MAGED1 | cna | amp     | BASIS    |
| PD8621       | MAGED1 | cna | amp     | BASIS    |
| PD8980       | MAGED1 | cna | hetloss | BASIS    |
| PD9004       | MAGED1 | cna | gain    | BASIS    |
| TCGA-A2-A25B | MALT1  | cna | hetloss | TCGA     |
| TCGA-AO-A0JL | MALT1  | cna | gain    | TCGA     |
| TCGA-BH-A0AW | MALT1  | cna | hetloss | TCGA     |
| TCGA-BH-A0C0 | MALT1  | cna | gain    | TCGA     |
| TCGA-C8-A12L | MALT1  | cna | gain    | TCGA     |
| TCGA-D8-A27M | MALT1  | cna | hetloss | TCGA     |
| TCGA-E2-A1L7 | MALT1  | cna | gain    | TCGA     |
| TCGA-LL-A5YP | MALT1  | cna | homdel  | TCGA     |
| MB-0346      | MALT1  | cna | hetloss | METABRIC |
| MB-0420      | MALT1  | cna | hetloss | METABRIC |
| PD10014      | MALT1  | cna | hetloss | BASIS    |
| PD11742      | MALT1  | cna | hetloss | BASIS    |
| PD13296      | MALT1  | cna | hetloss | BASIS    |
| PD13297      | MALT1  | cna | gain    | BASIS    |
| PD13299      | MALT1  | cna | gain    | BASIS    |
| PD22355      | MALT1  | cna | hetloss | BASIS    |
| PD23574      | MALT1  | cna | hetloss | BASIS    |
| PD23578      | MALT1  | cna | hetloss | BASIS    |
| PD24186      | MALT1  | cna | gain    | BASIS    |
| PD24202      | MALT1  | cna | hetloss | BASIS    |
| PD24337      | MALT1  | cna | gain    | BASIS    |
| PD4006       | MALT1  | cna | gain    | BASIS    |
| PD4107       | MALT1  | cna | gain    | BASIS    |
| PD4826       | MALT1  | cna | hetloss | BASIS    |
| PD4967       | MALT1  | cna | hetloss | BASIS    |
| PD5930       | MALT1  | cna | gain    | BASIS    |
| PD5935       | MALT1  | cna | hetloss | BASIS    |
| PD5945       | MALT1  | cna | gain    | BASIS    |
| PD5948       | MALT1  | cna | gain    | BASIS    |
| PD6406       | MALT1  | cna | gain    | BASIS    |
| PD6413       | MALT1  | cna | gain    | BASIS    |
| PD8980       | MALT1  | cna | hetloss | BASIS    |
| PD9004       | MALT1  | cna | hetloss | BASIS    |
| PD9585       | MALT1  | cna | hetloss | BASIS    |
| PD9702       | MALT1  | cna | gain    | BASIS    |

|              |       |     |         |          |
|--------------|-------|-----|---------|----------|
| TCGA-A2-A25B | MAX   | cna | hetloss | TCGA     |
| TCGA-AO-A0JL | MAX   | cna | hetloss | TCGA     |
| TCGA-BH-A0AW | MAX   | cna | hetloss | TCGA     |
| TCGA-BH-A1FU | MAX   | cna | gain    | TCGA     |
| TCGA-C8-A12L | MAX   | cna | hetloss | TCGA     |
| TCGA-D8-A27M | MAX   | cna | hetloss | TCGA     |
| TCGA-E2-A1L7 | MAX   | cna | hetloss | TCGA     |
| TCGA-LL-A5YP | MAX   | cna | hetloss | TCGA     |
| MB-2827      | MAX   | cna | hetloss | METABRIC |
| MB-5070      | MAX   | cna | hetloss | METABRIC |
| MB-6098      | MAX   | cna | hetloss | METABRIC |
| MB-7038      | MAX   | cna | hetloss | METABRIC |
| PD10014      | MAX   | cna | hetloss | BASIS    |
| PD11742      | MAX   | cna | hetloss | BASIS    |
| PD13296      | MAX   | cna | gain    | BASIS    |
| PD13297      | MAX   | cna | hetloss | BASIS    |
| PD13771      | MAX   | cna | hetloss | BASIS    |
| PD14442      | MAX   | cna | hetloss | BASIS    |
| PD22355      | MAX   | cna | hetloss | BASIS    |
| PD23578      | MAX   | cna | hetloss | BASIS    |
| PD24202      | MAX   | cna | hetloss | BASIS    |
| PD24206      | MAX   | cna | gain    | BASIS    |
| PD24337      | MAX   | cna | hetloss | BASIS    |
| PD3890       | MAX   | cna | hetloss | BASIS    |
| PD3905       | MAX   | cna | gain    | BASIS    |
| PD4005       | MAX   | cna | hetloss | BASIS    |
| PD4006       | MAX   | cna | gain    | BASIS    |
| PD5945       | MAX   | cna | gain    | BASIS    |
| PD6406       | MAX   | cna | hetloss | BASIS    |
| PD7067       | MAX   | cna | gain    | BASIS    |
| PD7215       | MAX   | cna | hetloss | BASIS    |
| PD8980       | MAX   | cna | gain    | BASIS    |
| PD9004       | MAX   | cna | hetloss | BASIS    |
| PD9585       | MAX   | cna | gain    | BASIS    |
| PD9702       | MAX   | cna | gain    | BASIS    |
| TCGA-AN-A0XU | MEF2B | cna | hetloss | TCGA     |
| TCGA-AO-A0JL | MEF2B | cna | gain    | TCGA     |
| TCGA-BH-A0AW | MEF2B | cna | gain    | TCGA     |
| TCGA-BH-A0C0 | MEF2B | cna | gain    | TCGA     |
| TCGA-BH-A1FU | MEF2B | cna | hetloss | TCGA     |
| TCGA-C8-A12L | MEF2B | cna | gain    | TCGA     |
| TCGA-D8-A27M | MEF2B | cna | hetloss | TCGA     |
| TCGA-EW-A10X | MEF2B | cna | hetloss | TCGA     |
| TCGA-LL-A5YP | MEF2B | cna | hetloss | TCGA     |
| MB-0346      | MEF2B | cna | hetloss | METABRIC |
| MB-2827      | MEF2B | cna | hetloss | METABRIC |
| MB-6060      | MEF2B | cna | gain    | METABRIC |

|              |       |     |         |          |
|--------------|-------|-----|---------|----------|
| MB-6098      | MEF2B | cna | hetloss | METABRIC |
| MB-0420      | MEF2B | cna | hetloss | METABRIC |
| MTS-T0064    | MEF2B | cna | amp     | METABRIC |
| PD13299      | MEF2B | cna | gain    | BASIS    |
| PD14442      | MEF2B | cna | hetloss | BASIS    |
| PD22355      | MEF2B | cna | gain    | BASIS    |
| PD23562      | MEF2B | cna | gain    | BASIS    |
| PD23574      | MEF2B | cna | gain    | BASIS    |
| PD24186      | MEF2B | cna | amp     | BASIS    |
| PD24206      | MEF2B | cna | hetloss | BASIS    |
| PD3890       | MEF2B | cna | hetloss | BASIS    |
| PD3905       | MEF2B | cna | gain    | BASIS    |
| PD4006       | MEF2B | cna | amp     | BASIS    |
| PD4107       | MEF2B | cna | gain    | BASIS    |
| PD4826       | MEF2B | cna | gain    | BASIS    |
| PD4967       | MEF2B | cna | hetloss | BASIS    |
| PD5930       | MEF2B | cna | gain    | BASIS    |
| PD5935       | MEF2B | cna | gain    | BASIS    |
| PD5945       | MEF2B | cna | amp     | BASIS    |
| PD5948       | MEF2B | cna | gain    | BASIS    |
| PD7067       | MEF2B | cna | gain    | BASIS    |
| PD7215       | MEF2B | cna | amp     | BASIS    |
| PD9702       | MEF2B | cna | gain    | BASIS    |
| TCGA-AN-A0XU | MITF  | cna | hetloss | TCGA     |
| TCGA-BH-A0C0 | MITF  | cna | hetloss | TCGA     |
| TCGA-BH-A18R | MITF  | cna | homdel  | TCGA     |
| TCGA-BH-A1FU | MITF  | cna | hetloss | TCGA     |
| TCGA-C8-A12L | MITF  | cna | hetloss | TCGA     |
| TCGA-D8-A27M | MITF  | cna | hetloss | TCGA     |
| TCGA-E2-A1L7 | MITF  | cna | homdel  | TCGA     |
| TCGA-E9-A1NC | MITF  | cna | hetloss | TCGA     |
| TCGA-LL-A5YP | MITF  | cna | gain    | TCGA     |
| MB-0346      | MITF  | cna | hetloss | METABRIC |
| MB-2827      | MITF  | cna | hetloss | METABRIC |
| MB-5465      | MITF  | cna | hetloss | METABRIC |
| MB-6098      | MITF  | cna | hetloss | METABRIC |
| MB-7048      | MITF  | cna | hetloss | METABRIC |
| MB-0420      | MITF  | cna | hetloss | METABRIC |
| MTS-T0064    | MITF  | cna | gain    | METABRIC |
| PD10014      | MITF  | cna | hetloss | BASIS    |
| PD11742      | MITF  | cna | hetloss | BASIS    |
| PD13296      | MITF  | cna | hetloss | BASIS    |
| PD13297      | MITF  | cna | hetloss | BASIS    |
| PD13299      | MITF  | cna | gain    | BASIS    |
| PD13771      | MITF  | cna | hetloss | BASIS    |
| PD23561      | MITF  | cna | hetloss | BASIS    |
| PD23574      | MITF  | cna | gain    | BASIS    |

|              |        |     |         |          |
|--------------|--------|-----|---------|----------|
| PD23578      | MITF   | cna | hetloss | BASIS    |
| PD24202      | MITF   | cna | hetloss | BASIS    |
| PD24337      | MITF   | cna | hetloss | BASIS    |
| PD3905       | MITF   | cna | gain    | BASIS    |
| PD4107       | MITF   | cna | gain    | BASIS    |
| PD5945       | MITF   | cna | gain    | BASIS    |
| PD6406       | MITF   | cna | hetloss | BASIS    |
| PD6413       | MITF   | cna | hetloss | BASIS    |
| PD6731       | MITF   | cna | hetloss | BASIS    |
| PD8980       | MITF   | cna | hetloss | BASIS    |
| PD9585       | MITF   | cna | hetloss | BASIS    |
| TCGA-A2-A25B | MKI67  | cna | hetloss | TCGA     |
| TCGA-AN-A0XU | MKI67  | cna | hetloss | TCGA     |
| TCGA-AO-A0JL | MKI67  | cna | hetloss | TCGA     |
| TCGA-C8-A12L | MKI67  | cna | hetloss | TCGA     |
| TCGA-E2-A1L7 | MKI67  | cna | hetloss | TCGA     |
| TCGA-E9-A1NC | MKI67  | cna | hetloss | TCGA     |
| TCGA-LL-A5YP | MKI67  | cna | gain    | TCGA     |
| MB-0346      | MKI67  | cna | hetloss | METABRIC |
| MB-2827      | MKI67  | cna | hetloss | METABRIC |
| MB-5070      | MKI67  | cna | hetloss | METABRIC |
| MB-5465      | MKI67  | cna | hetloss | METABRIC |
| MB-6098      | MKI67  | cna | hetloss | METABRIC |
| MB-7038      | MKI67  | cna | hetloss | METABRIC |
| PD10014      | MKI67  | cna | gain    | BASIS    |
| PD11327      | MKI67  | cna | gain    | BASIS    |
| PD11742      | MKI67  | cna | hetloss | BASIS    |
| PD23562      | MKI67  | cna | gain    | BASIS    |
| PD24186      | MKI67  | cna | gain    | BASIS    |
| PD24202      | MKI67  | cna | hetloss | BASIS    |
| PD24206      | MKI67  | cna | gain    | BASIS    |
| PD24337      | MKI67  | cna | hetloss | BASIS    |
| PD3890       | MKI67  | cna | hetloss | BASIS    |
| PD3905       | MKI67  | cna | gain    | BASIS    |
| PD4005       | MKI67  | cna | hetloss | BASIS    |
| PD4006       | MKI67  | cna | hetloss | BASIS    |
| PD4107       | MKI67  | cna | gain    | BASIS    |
| PD5935       | MKI67  | cna | gain    | BASIS    |
| PD5945       | MKI67  | cna | gain    | BASIS    |
| PD5948       | MKI67  | cna | gain    | BASIS    |
| PD6406       | MKI67  | cna | hetloss | BASIS    |
| PD6731       | MKI67  | cna | hetloss | BASIS    |
| PD7067       | MKI67  | cna | gain    | BASIS    |
| PD7215       | MKI67  | cna | gain    | BASIS    |
| PD8621       | MKI67  | cna | gain    | BASIS    |
| PD8980       | MKI67  | cna | hetloss | BASIS    |
| TCGA-A2-A25B | MRE11A | cna | hetloss | TCGA     |

|              |        |     |         |          |
|--------------|--------|-----|---------|----------|
| TCGA-AN-A0XU | MRE11A | cna | gain    | TCGA     |
| TCGA-AO-A0JL | MRE11A | cna | hetloss | TCGA     |
| TCGA-D8-A27M | MRE11A | cna | gain    | TCGA     |
| TCGA-EW-A10X | MRE11A | cna | homdel  | TCGA     |
| TCGA-LL-A5YP | MRE11A | cna | hetloss | TCGA     |
| MB-0346      | MRE11A | cna | hetloss | METABRIC |
| MB-5070      | MRE11A | cna | hetloss | METABRIC |
| MB-6271      | MRE11A | cna | hetloss | METABRIC |
| MB-7032      | MRE11A | cna | hetloss | METABRIC |
| MB-7048      | MRE11A | cna | hetloss | METABRIC |
| MTS-T0064    | MRE11A | cna | gain    | METABRIC |
| PD10014      | MRE11A | cna | gain    | BASIS    |
| PD11327      | MRE11A | cna | gain    | BASIS    |
| PD11742      | MRE11A | cna | hetloss | BASIS    |
| PD13299      | MRE11A | cna | gain    | BASIS    |
| PD13771      | MRE11A | cna | hetloss | BASIS    |
| PD22355      | MRE11A | cna | hetloss | BASIS    |
| PD23574      | MRE11A | cna | gain    | BASIS    |
| PD23578      | MRE11A | cna | hetloss | BASIS    |
| PD24186      | MRE11A | cna | gain    | BASIS    |
| PD24206      | MRE11A | cna | gain    | BASIS    |
| PD24337      | MRE11A | cna | hetloss | BASIS    |
| PD3905       | MRE11A | cna | gain    | BASIS    |
| PD4006       | MRE11A | cna | hetloss | BASIS    |
| PD4826       | MRE11A | cna | hetloss | BASIS    |
| PD5935       | MRE11A | cna | gain    | BASIS    |
| PD5945       | MRE11A | cna | gain    | BASIS    |
| PD5948       | MRE11A | cna | gain    | BASIS    |
| PD6413       | MRE11A | cna | hetloss | BASIS    |
| PD7067       | MRE11A | cna | amp     | BASIS    |
| PD7215       | MRE11A | cna | gain    | BASIS    |
| PD8980       | MRE11A | cna | gain    | BASIS    |
| PD9585       | MRE11A | cna | gain    | BASIS    |
| PD9702       | MRE11A | cna | gain    | BASIS    |
| TCGA-AN-A0XU | PARP2  | cna | gain    | TCGA     |
| TCGA-AO-A0JL | PARP2  | cna | amp     | TCGA     |
| TCGA-BH-A0AW | PARP2  | cna | hetloss | TCGA     |
| TCGA-BH-A1FU | PARP2  | cna | gain    | TCGA     |
| TCGA-D8-A27M | PARP2  | cna | gain    | TCGA     |
| TCGA-LL-A5YP | PARP2  | cna | hetloss | TCGA     |
| MB-5070      | PARP2  | cna | hetloss | METABRIC |
| MB-6060      | PARP2  | cna | gain    | METABRIC |
| MB-7048      | PARP2  | cna | gain    | METABRIC |
| PD11327      | PARP2  | cna | homdel  | BASIS    |
| PD13296      | PARP2  | cna | gain    | BASIS    |
| PD13299      | PARP2  | cna | gain    | BASIS    |
| PD22355      | PARP2  | cna | hetloss | BASIS    |



|              |       |     |         |          |
|--------------|-------|-----|---------|----------|
| PD23574      | PARP2 | cna | gain    | BASIS    |
| PD23578      | PARP2 | cna | hetloss | BASIS    |
| PD24186      | PARP2 | cna | gain    | BASIS    |
| PD24202      | PARP2 | cna | hetloss | BASIS    |
| PD24206      | PARP2 | cna | gain    | BASIS    |
| PD24337      | PARP2 | cna | hetloss | BASIS    |
| PD3890       | PARP2 | cna | hetloss | BASIS    |
| PD3905       | PARP2 | cna | gain    | BASIS    |
| PD4005       | PARP2 | cna | hetloss | BASIS    |
| PD4107       | PARP2 | cna | gain    | BASIS    |
| PD4967       | PARP2 | cna | hetloss | BASIS    |
| PD5930       | PARP2 | cna | hetloss | BASIS    |
| PD5935       | PARP2 | cna | gain    | BASIS    |
| PD5945       | PARP2 | cna | amp     | BASIS    |
| PD5948       | PARP2 | cna | gain    | BASIS    |
| PD6406       | PARP2 | cna | hetloss | BASIS    |
| PD6731       | PARP2 | cna | hetloss | BASIS    |
| PD7215       | PARP2 | cna | gain    | BASIS    |
| PD8621       | PARP2 | cna | gain    | BASIS    |
| PD8980       | PARP2 | cna | gain    | BASIS    |
| PD9004       | PARP2 | cna | gain    | BASIS    |
| PD9702       | PARP2 | cna | gain    | BASIS    |
| TCGA-AO-A0JL | PASK  | cna | hetloss | TCGA     |
| TCGA-BH-A0AW | PASK  | cna | hetloss | TCGA     |
| TCGA-C8-A12L | PASK  | cna | hetloss | TCGA     |
| TCGA-D8-A27M | PASK  | cna | gain    | TCGA     |
| TCGA-E2-A1L7 | PASK  | cna | hetloss | TCGA     |
| TCGA-E9-A1NC | PASK  | cna | hetloss | TCGA     |
| MB-5107      | PASK  | cna | hetloss | METABRIC |
| MB-6060      | PASK  | cna | hetloss | METABRIC |
| MB-6098      | PASK  | cna | hetloss | METABRIC |
| MB-6271      | PASK  | cna | hetloss | METABRIC |
| MB-7048      | PASK  | cna | hetloss | METABRIC |
| PD10014      | PASK  | cna | gain    | BASIS    |
| PD11327      | PASK  | cna | gain    | BASIS    |
| PD11742      | PASK  | cna | hetloss | BASIS    |
| PD13296      | PASK  | cna | hetloss | BASIS    |
| PD13297      | PASK  | cna | hetloss | BASIS    |
| PD23578      | PASK  | cna | hetloss | BASIS    |
| PD24186      | PASK  | cna | gain    | BASIS    |
| PD24202      | PASK  | cna | hetloss | BASIS    |
| PD24206      | PASK  | cna | gain    | BASIS    |
| PD3890       | PASK  | cna | hetloss | BASIS    |
| PD3905       | PASK  | cna | gain    | BASIS    |
| PD4005       | PASK  | cna | hetloss | BASIS    |
| PD4006       | PASK  | cna | gain    | BASIS    |
| PD4967       | PASK  | cna | hetloss | BASIS    |

|              |        |     |         |          |
|--------------|--------|-----|---------|----------|
| PD5935       | PASK   | cna | gain    | BASIS    |
| PD5945       | PASK   | cna | gain    | BASIS    |
| PD5948       | PASK   | cna | gain    | BASIS    |
| PD6406       | PASK   | cna | hetloss | BASIS    |
| PD6413       | PASK   | cna | hetloss | BASIS    |
| PD6731       | PASK   | cna | hetloss | BASIS    |
| PD7067       | PASK   | cna | gain    | BASIS    |
| PD7215       | PASK   | cna | gain    | BASIS    |
| PD8980       | PASK   | cna | hetloss | BASIS    |
| PD9585       | PASK   | cna | hetloss | BASIS    |
| TCGA-A2-A25B | PMAIP1 | cna | hetloss | TCGA     |
| TCGA-AO-A0JL | PMAIP1 | cna | gain    | TCGA     |
| TCGA-BH-A0AW | PMAIP1 | cna | hetloss | TCGA     |
| TCGA-BH-A0C0 | PMAIP1 | cna | gain    | TCGA     |
| TCGA-C8-A12L | PMAIP1 | cna | gain    | TCGA     |
| TCGA-D8-A27M | PMAIP1 | cna | hetloss | TCGA     |
| TCGA-E2-A1L7 | PMAIP1 | cna | gain    | TCGA     |
| TCGA-LL-A5YP | PMAIP1 | cna | homdel  | TCGA     |
| MB-0346      | PMAIP1 | cna | hetloss | METABRIC |
| MB-0420      | PMAIP1 | cna | hetloss | METABRIC |
| MTS-T0064    | PMAIP1 | cna | hetloss | METABRIC |
| PD10014      | PMAIP1 | cna | hetloss | BASIS    |
| PD11742      | PMAIP1 | cna | hetloss | BASIS    |
| PD13296      | PMAIP1 | cna | hetloss | BASIS    |
| PD13297      | PMAIP1 | cna | gain    | BASIS    |
| PD13299      | PMAIP1 | cna | gain    | BASIS    |
| PD22355      | PMAIP1 | cna | hetloss | BASIS    |
| PD23574      | PMAIP1 | cna | hetloss | BASIS    |
| PD23578      | PMAIP1 | cna | hetloss | BASIS    |
| PD24186      | PMAIP1 | cna | gain    | BASIS    |
| PD24202      | PMAIP1 | cna | hetloss | BASIS    |
| PD24337      | PMAIP1 | cna | gain    | BASIS    |
| PD4006       | PMAIP1 | cna | gain    | BASIS    |
| PD4107       | PMAIP1 | cna | gain    | BASIS    |
| PD4826       | PMAIP1 | cna | hetloss | BASIS    |
| PD4967       | PMAIP1 | cna | hetloss | BASIS    |
| PD5930       | PMAIP1 | cna | gain    | BASIS    |
| PD5935       | PMAIP1 | cna | hetloss | BASIS    |
| PD5945       | PMAIP1 | cna | gain    | BASIS    |
| PD5948       | PMAIP1 | cna | gain    | BASIS    |
| PD6406       | PMAIP1 | cna | gain    | BASIS    |
| PD8980       | PMAIP1 | cna | hetloss | BASIS    |
| PD9004       | PMAIP1 | cna | hetloss | BASIS    |
| PD9585       | PMAIP1 | cna | hetloss | BASIS    |
| PD9702       | PMAIP1 | cna | gain    | BASIS    |
| TCGA-A2-A25B | PML    | cna | gain    | TCGA     |
| TCGA-AN-A0XU | PML    | cna | amp     | TCGA     |

|              |      |     |         |          |
|--------------|------|-----|---------|----------|
| TCGA-AO-A0JL | PML  | cna | hetloss | TCGA     |
| TCGA-BH-A0AW | PML  | cna | hetloss | TCGA     |
| TCGA-BH-A0C0 | PML  | cna | hetloss | TCGA     |
| TCGA-D8-A27M | PML  | cna | hetloss | TCGA     |
| TCGA-E2-A1L7 | PML  | cna | gain    | TCGA     |
| TCGA-LL-A5YP | PML  | cna | hetloss | TCGA     |
| MB-0346      | PML  | cna | hetloss | METABRIC |
| MB-5070      | PML  | cna | hetloss | METABRIC |
| MB-6060      | PML  | cna | hetloss | METABRIC |
| MB-7038      | PML  | cna | gain    | METABRIC |
| PD11327      | PML  | cna | gain    | BASIS    |
| PD11742      | PML  | cna | hetloss | BASIS    |
| PD13296      | PML  | cna | homdel  | BASIS    |
| PD13297      | PML  | cna | hetloss | BASIS    |
| PD13299      | PML  | cna | gain    | BASIS    |
| PD22355      | PML  | cna | hetloss | BASIS    |
| PD23562      | PML  | cna | gain    | BASIS    |
| PD23574      | PML  | cna | gain    | BASIS    |
| PD23578      | PML  | cna | gain    | BASIS    |
| PD24202      | PML  | cna | hetloss | BASIS    |
| PD24206      | PML  | cna | gain    | BASIS    |
| PD3890       | PML  | cna | hetloss | BASIS    |
| PD3905       | PML  | cna | gain    | BASIS    |
| PD4006       | PML  | cna | gain    | BASIS    |
| PD5945       | PML  | cna | gain    | BASIS    |
| PD5948       | PML  | cna | gain    | BASIS    |
| PD6406       | PML  | cna | hetloss | BASIS    |
| PD7067       | PML  | cna | gain    | BASIS    |
| PD7215       | PML  | cna | gain    | BASIS    |
| PD8621       | PML  | cna | gain    | BASIS    |
| PD8980       | PML  | cna | gain    | BASIS    |
| PD9585       | PML  | cna | hetloss | BASIS    |
| PD9702       | PML  | cna | gain    | BASIS    |
| TCGA-A2-A25B | POLE | cna | gain    | TCGA     |
| TCGA-AN-A0XU | POLE | cna | hetloss | TCGA     |
| TCGA-AO-A0JL | POLE | cna | hetloss | TCGA     |
| TCGA-BH-A0C0 | POLE | cna | hetloss | TCGA     |
| TCGA-BH-A18R | POLE | cna | gain    | TCGA     |
| TCGA-BH-A1FU | POLE | cna | hetloss | TCGA     |
| TCGA-D8-A27M | POLE | cna | hetloss | TCGA     |
| TCGA-E2-A1L7 | POLE | cna | hetloss | TCGA     |
| TCGA-LL-A5YP | POLE | cna | hetloss | TCGA     |
| MB-0346      | POLE | cna | gain    | METABRIC |
| MB-2827      | POLE | cna | hetloss | METABRIC |
| MB-5070      | POLE | cna | hetloss | METABRIC |
| MB-5465      | POLE | cna | hetloss | METABRIC |
| MB-7048      | POLE | cna | hetloss | METABRIC |

|              |         |     |         |          |
|--------------|---------|-----|---------|----------|
| MTS-T0064    | POLE    | cna | gain    | METABRIC |
| PD11327      | POLE    | cna | gain    | BASIS    |
| PD13296      | POLE    | cna | hetloss | BASIS    |
| PD13771      | POLE    | cna | gain    | BASIS    |
| PD22355      | POLE    | cna | hetloss | BASIS    |
| PD23574      | POLE    | cna | gain    | BASIS    |
| PD23578      | POLE    | cna | hetloss | BASIS    |
| PD24186      | POLE    | cna | gain    | BASIS    |
| PD24206      | POLE    | cna | gain    | BASIS    |
| PD3905       | POLE    | cna | gain    | BASIS    |
| PD4005       | POLE    | cna | hetloss | BASIS    |
| PD4006       | POLE    | cna | amp     | BASIS    |
| PD4107       | POLE    | cna | gain    | BASIS    |
| PD4826       | POLE    | cna | gain    | BASIS    |
| PD5935       | POLE    | cna | gain    | BASIS    |
| PD5945       | POLE    | cna | gain    | BASIS    |
| PD5948       | POLE    | cna | gain    | BASIS    |
| PD6731       | POLE    | cna | hetloss | BASIS    |
| PD7067       | POLE    | cna | gain    | BASIS    |
| PD9585       | POLE    | cna | hetloss | BASIS    |
| PD9702       | POLE    | cna | gain    | BASIS    |
| TCGA-AO-A0JL | PPP2R1A | cna | hetloss | TCGA     |
| TCGA-BH-A0AW | PPP2R1A | cna | gain    | TCGA     |
| TCGA-BH-A0C0 | PPP2R1A | cna | hetloss | TCGA     |
| TCGA-BH-A1FU | PPP2R1A | cna | hetloss | TCGA     |
| TCGA-D8-A27M | PPP2R1A | cna | hetloss | TCGA     |
| TCGA-E2-A1L7 | PPP2R1A | cna | hetloss | TCGA     |
| TCGA-EW-A10X | PPP2R1A | cna | hetloss | TCGA     |
| TCGA-LL-A5YP | PPP2R1A | cna | gain    | TCGA     |
| MB-0346      | PPP2R1A | cna | hetloss | METABRIC |
| MB-2827      | PPP2R1A | cna | hetloss | METABRIC |
| MB-6098      | PPP2R1A | cna | hetloss | METABRIC |
| MB-7048      | PPP2R1A | cna | gain    | METABRIC |
| PD11327      | PPP2R1A | cna | gain    | BASIS    |
| PD13296      | PPP2R1A | cna | gain    | BASIS    |
| PD13299      | PPP2R1A | cna | gain    | BASIS    |
| PD13771      | PPP2R1A | cna | hetloss | BASIS    |
| PD23562      | PPP2R1A | cna | gain    | BASIS    |
| PD23574      | PPP2R1A | cna | gain    | BASIS    |
| PD24186      | PPP2R1A | cna | gain    | BASIS    |
| PD24206      | PPP2R1A | cna | hetloss | BASIS    |
| PD24337      | PPP2R1A | cna | hetloss | BASIS    |
| PD3890       | PPP2R1A | cna | hetloss | BASIS    |
| PD3905       | PPP2R1A | cna | gain    | BASIS    |
| PD4006       | PPP2R1A | cna | gain    | BASIS    |
| PD4107       | PPP2R1A | cna | gain    | BASIS    |
| PD4826       | PPP2R1A | cna | gain    | BASIS    |

|              |         |     |         |          |
|--------------|---------|-----|---------|----------|
| PD5935       | PPP2R1A | cna | gain    | BASIS    |
| PD5945       | PPP2R1A | cna | gain    | BASIS    |
| PD5948       | PPP2R1A | cna | gain    | BASIS    |
| PD6406       | PPP2R1A | cna | gain    | BASIS    |
| PD7067       | PPP2R1A | cna | gain    | BASIS    |
| PD7215       | PPP2R1A | cna | gain    | BASIS    |
| PD8621       | PPP2R1A | cna | gain    | BASIS    |
| PD8980       | PPP2R1A | cna | hetloss | BASIS    |
| PD9585       | PPP2R1A | cna | gain    | BASIS    |
| TCGA-A2-A25B | PTCH1   | cna | gain    | TCGA     |
| TCGA-AN-A0XU | PTCH1   | cna | hetloss | TCGA     |
| TCGA-AO-A0JL | PTCH1   | cna | hetloss | TCGA     |
| TCGA-BH-A1FU | PTCH1   | cna | hetloss | TCGA     |
| TCGA-C8-A12L | PTCH1   | cna | hetloss | TCGA     |
| TCGA-E2-A1L7 | PTCH1   | cna | hetloss | TCGA     |
| TCGA-E9-A1NC | PTCH1   | cna | hetloss | TCGA     |
| TCGA-LL-A5YP | PTCH1   | cna | hetloss | TCGA     |
| MB-0346      | PTCH1   | cna | hetloss | METABRIC |
| MB-2827      | PTCH1   | cna | amp     | METABRIC |
| MB-5070      | PTCH1   | cna | hetloss | METABRIC |
| MB-5107      | PTCH1   | cna | hetloss | METABRIC |
| MB-6098      | PTCH1   | cna | hetloss | METABRIC |
| MB-7038      | PTCH1   | cna | hetloss | METABRIC |
| PD11327      | PTCH1   | cna | gain    | BASIS    |
| PD13296      | PTCH1   | cna | gain    | BASIS    |
| PD13771      | PTCH1   | cna | hetloss | BASIS    |
| PD23562      | PTCH1   | cna | gain    | BASIS    |
| PD23578      | PTCH1   | cna | hetloss | BASIS    |
| PD24186      | PTCH1   | cna | amp     | BASIS    |
| PD24202      | PTCH1   | cna | hetloss | BASIS    |
| PD24206      | PTCH1   | cna | gain    | BASIS    |
| PD3905       | PTCH1   | cna | gain    | BASIS    |
| PD4005       | PTCH1   | cna | gain    | BASIS    |
| PD4006       | PTCH1   | cna | gain    | BASIS    |
| PD4107       | PTCH1   | cna | gain    | BASIS    |
| PD5945       | PTCH1   | cna | amp     | BASIS    |
| PD5948       | PTCH1   | cna | gain    | BASIS    |
| PD6406       | PTCH1   | cna | hetloss | BASIS    |
| PD6731       | PTCH1   | cna | hetloss | BASIS    |
| PD7067       | PTCH1   | cna | gain    | BASIS    |
| PD7215       | PTCH1   | cna | gain    | BASIS    |
| PD8621       | PTCH1   | cna | gain    | BASIS    |
| PD9004       | PTCH1   | cna | gain    | BASIS    |
| PD9585       | PTCH1   | cna | hetloss | BASIS    |
| TCGA-A2-A25B | PTPRD   | cna | homdel  | TCGA     |
| TCGA-AO-A0JL | PTPRD   | cna | gain    | TCGA     |
| TCGA-BH-A0AW | PTPRD   | cna | homdel  | TCGA     |

|                   |       |     |         |            |
|-------------------|-------|-----|---------|------------|
| TCGA-BH-A1FU      | PTPRD | cna | hetloss | TCGA       |
| TCGA-C8-A12L      | PTPRD | cna | gain    | TCGA       |
| TCGA-E2-A1L7      | PTPRD | cna | hetloss | TCGA       |
| TCGA-E9-A1NC      | PTPRD | cna | amp     | TCGA       |
| MB-6060           | PTPRD | cna | gain    | METABRIC   |
| MB-0420           | PTPRD | cna | hetloss | METABRIC   |
| MTS-T0064         | PTPRD | cna | amp     | METABRIC   |
| P-0009557-T01-IM5 | PTPRD | cna | amp     | MSK-IMPACT |
| PD11327           | PTPRD | cna | hetloss | BASIS      |
| PD13296           | PTPRD | cna | gain    | BASIS      |
| PD13297           | PTPRD | cna | hetloss | BASIS      |
| PD13299           | PTPRD | cna | amp     | BASIS      |
| PD22355           | PTPRD | cna | gain    | BASIS      |
| PD23574           | PTPRD | cna | gain    | BASIS      |
| PD24186           | PTPRD | cna | gain    | BASIS      |
| PD24337           | PTPRD | cna | gain    | BASIS      |
| PD3905            | PTPRD | cna | gain    | BASIS      |
| PD4005            | PTPRD | cna | hetloss | BASIS      |
| PD4006            | PTPRD | cna | gain    | BASIS      |
| PD4107            | PTPRD | cna | gain    | BASIS      |
| PD4826            | PTPRD | cna | gain    | BASIS      |
| PD5945            | PTPRD | cna | gain    | BASIS      |
| PD5948            | PTPRD | cna | hetloss | BASIS      |
| PD6406            | PTPRD | cna | homdel  | BASIS      |
| PD6413            | PTPRD | cna | gain    | BASIS      |
| PD6731            | PTPRD | cna | gain    | BASIS      |
| PD7067            | PTPRD | cna | amp     | BASIS      |
| PD8621            | PTPRD | cna | gain    | BASIS      |
| PD8980            | PTPRD | cna | gain    | BASIS      |
| PD9004            | PTPRD | cna | gain    | BASIS      |
| PD9585            | PTPRD | cna | hetloss | BASIS      |
| PD9702            | PTPRD | cna | gain    | BASIS      |
| TCGA-AN-A0XU      | PTPRS | cna | hetloss | TCGA       |
| TCGA-AO-A0JL      | PTPRS | cna | gain    | TCGA       |
| TCGA-BH-A0C0      | PTPRS | cna | gain    | TCGA       |
| TCGA-BH-A1FU      | PTPRS | cna | hetloss | TCGA       |
| TCGA-C8-A12L      | PTPRS | cna | gain    | TCGA       |
| TCGA-D8-A27M      | PTPRS | cna | hetloss | TCGA       |
| TCGA-E9-A1NC      | PTPRS | cna | hetloss | TCGA       |
| TCGA-EW-A1OX      | PTPRS | cna | hetloss | TCGA       |
| TCGA-LL-A5YP      | PTPRS | cna | hetloss | TCGA       |
| MB-0346           | PTPRS | cna | gain    | METABRIC   |
| MB-2827           | PTPRS | cna | hetloss | METABRIC   |
| MB-5070           | PTPRS | cna | hetloss | METABRIC   |
| MB-5465           | PTPRS | cna | gain    | METABRIC   |
| MB-6060           | PTPRS | cna | gain    | METABRIC   |
| MB-6098           | PTPRS | cna | hetloss | METABRIC   |

|              |        |     |         |          |
|--------------|--------|-----|---------|----------|
| MB-7038      | PTPRS  | cna | hetloss | METABRIC |
| MB-0420      | PTPRS  | cna | hetloss | METABRIC |
| PD10014      | PTPRS  | cna | hetloss | BASIS    |
| PD11742      | PTPRS  | cna | hetloss | BASIS    |
| PD14442      | PTPRS  | cna | hetloss | BASIS    |
| PD23574      | PTPRS  | cna | gain    | BASIS    |
| PD24202      | PTPRS  | cna | gain    | BASIS    |
| PD24206      | PTPRS  | cna | hetloss | BASIS    |
| PD3905       | PTPRS  | cna | gain    | BASIS    |
| PD4006       | PTPRS  | cna | gain    | BASIS    |
| PD4107       | PTPRS  | cna | gain    | BASIS    |
| PD4826       | PTPRS  | cna | gain    | BASIS    |
| PD5930       | PTPRS  | cna | gain    | BASIS    |
| PD5945       | PTPRS  | cna | gain    | BASIS    |
| PD5948       | PTPRS  | cna | gain    | BASIS    |
| PD7067       | PTPRS  | cna | gain    | BASIS    |
| PD8621       | PTPRS  | cna | gain    | BASIS    |
| PD8980       | PTPRS  | cna | gain    | BASIS    |
| PD9004       | PTPRS  | cna | hetloss | BASIS    |
| PD9702       | PTPRS  | cna | gain    | BASIS    |
| TCGA-A2-A25B | RABEP1 | cna | hetloss | TCGA     |
| TCGA-AN-A0XU | RABEP1 | cna | gain    | TCGA     |
| TCGA-AO-A0JL | RABEP1 | cna | gain    | TCGA     |
| TCGA-BH-A0AW | RABEP1 | cna | hetloss | TCGA     |
| TCGA-BH-A0C0 | RABEP1 | cna | hetloss | TCGA     |
| TCGA-C8-A12L | RABEP1 | cna | hetloss | TCGA     |
| TCGA-D8-A27M | RABEP1 | cna | hetloss | TCGA     |
| TCGA-E2-A1L7 | RABEP1 | cna | hetloss | TCGA     |
| TCGA-E9-A1NC | RABEP1 | cna | hetloss | TCGA     |
| TCGA-LL-A5YP | RABEP1 | cna | gain    | TCGA     |
| MB-0346      | RABEP1 | cna | hetloss | METABRIC |
| MB-2827      | RABEP1 | cna | hetloss | METABRIC |
| MB-5107      | RABEP1 | cna | hetloss | METABRIC |
| MB-6271      | RABEP1 | cna | hetloss | METABRIC |
| MB-7032      | RABEP1 | cna | gain    | METABRIC |
| MB-7048      | RABEP1 | cna | hetloss | METABRIC |
| MB-0420      | RABEP1 | cna | hetloss | METABRIC |
| PD10014      | RABEP1 | cna | hetloss | BASIS    |
| PD11742      | RABEP1 | cna | hetloss | BASIS    |
| PD13296      | RABEP1 | cna | hetloss | BASIS    |
| PD13771      | RABEP1 | cna | hetloss | BASIS    |
| PD24202      | RABEP1 | cna | hetloss | BASIS    |
| PD24206      | RABEP1 | cna | hetloss | BASIS    |
| PD24337      | RABEP1 | cna | hetloss | BASIS    |
| PD3890       | RABEP1 | cna | hetloss | BASIS    |
| PD3905       | RABEP1 | cna | gain    | BASIS    |
| PD4005       | RABEP1 | cna | hetloss | BASIS    |

|              |        |     |         |          |
|--------------|--------|-----|---------|----------|
| PD4826       | RABEP1 | cna | hetloss | BASIS    |
| PD4967       | RABEP1 | cna | hetloss | BASIS    |
| PD5945       | RABEP1 | cna | gain    | BASIS    |
| PD6406       | RABEP1 | cna | hetloss | BASIS    |
| PD6413       | RABEP1 | cna | hetloss | BASIS    |
| PD6731       | RABEP1 | cna | hetloss | BASIS    |
| PD7067       | RABEP1 | cna | gain    | BASIS    |
| PD9585       | RABEP1 | cna | hetloss | BASIS    |
| TCGA-A2-A25B | RAD51B | cna | hetloss | TCGA     |
| TCGA-AO-A0JL | RAD51B | cna | hetloss | TCGA     |
| TCGA-BH-A0AW | RAD51B | cna | hetloss | TCGA     |
| TCGA-BH-A1FU | RAD51B | cna | gain    | TCGA     |
| TCGA-C8-A12L | RAD51B | cna | hetloss | TCGA     |
| TCGA-D8-A27M | RAD51B | cna | hetloss | TCGA     |
| TCGA-E2-A1L7 | RAD51B | cna | hetloss | TCGA     |
| TCGA-LL-A5YP | RAD51B | cna | hetloss | TCGA     |
| MB-2827      | RAD51B | cna | hetloss | METABRIC |
| MB-5070      | RAD51B | cna | hetloss | METABRIC |
| MB-6060      | RAD51B | cna | gain    | METABRIC |
| MB-6098      | RAD51B | cna | hetloss | METABRIC |
| MB-7038      | RAD51B | cna | hetloss | METABRIC |
| MTS-T0064    | RAD51B | cna | gain    | METABRIC |
| PD11327      | RAD51B | cna | amp     | BASIS    |
| PD11742      | RAD51B | cna | hetloss | BASIS    |
| PD13296      | RAD51B | cna | gain    | BASIS    |
| PD13771      | RAD51B | cna | hetloss | BASIS    |
| PD14442      | RAD51B | cna | hetloss | BASIS    |
| PD23578      | RAD51B | cna | hetloss | BASIS    |
| PD24186      | RAD51B | cna | gain    | BASIS    |
| PD24202      | RAD51B | cna | hetloss | BASIS    |
| PD24206      | RAD51B | cna | gain    | BASIS    |
| PD24337      | RAD51B | cna | hetloss | BASIS    |
| PD3890       | RAD51B | cna | hetloss | BASIS    |
| PD3905       | RAD51B | cna | gain    | BASIS    |
| PD4005       | RAD51B | cna | hetloss | BASIS    |
| PD4006       | RAD51B | cna | gain    | BASIS    |
| PD5945       | RAD51B | cna | gain    | BASIS    |
| PD6406       | RAD51B | cna | hetloss | BASIS    |
| PD7067       | RAD51B | cna | gain    | BASIS    |
| PD7215       | RAD51B | cna | hetloss | BASIS    |
| PD8980       | RAD51B | cna | gain    | BASIS    |
| PD9004       | RAD51B | cna | hetloss | BASIS    |
| PD9702       | RAD51B | cna | gain    | BASIS    |
| TCGA-A2-A25B | RALGDS | cna | gain    | TCGA     |
| TCGA-AN-A0XU | RALGDS | cna | hetloss | TCGA     |
| TCGA-AO-A0JL | RALGDS | cna | hetloss | TCGA     |
| TCGA-BH-A0C0 | RALGDS | cna | gain    | TCGA     |



|              |        |     |         |          |
|--------------|--------|-----|---------|----------|
| TCGA-C8-A12L | RALGDS | cna | gain    | TCGA     |
| TCGA-E2-A1L7 | RALGDS | cna | hetloss | TCGA     |
| TCGA-E9-A1NC | RALGDS | cna | hetloss | TCGA     |
| TCGA-LL-A5YP | RALGDS | cna | hetloss | TCGA     |
| MB-0346      | RALGDS | cna | hetloss | METABRIC |
| MB-2827      | RALGDS | cna | amp     | METABRIC |
| MB-5070      | RALGDS | cna | hetloss | METABRIC |
| MB-7038      | RALGDS | cna | hetloss | METABRIC |
| MB-0420      | RALGDS | cna | hetloss | METABRIC |
| PD10014      | RALGDS | cna | gain    | BASIS    |
| PD11327      | RALGDS | cna | gain    | BASIS    |
| PD13299      | RALGDS | cna | gain    | BASIS    |
| PD22355      | RALGDS | cna | gain    | BASIS    |
| PD24186      | RALGDS | cna | gain    | BASIS    |
| PD24202      | RALGDS | cna | hetloss | BASIS    |
| PD24206      | RALGDS | cna | gain    | BASIS    |
| PD24337      | RALGDS | cna | hetloss | BASIS    |
| PD3890       | RALGDS | cna | hetloss | BASIS    |
| PD3905       | RALGDS | cna | gain    | BASIS    |
| PD4005       | RALGDS | cna | hetloss | BASIS    |
| PD4006       | RALGDS | cna | gain    | BASIS    |
| PD4107       | RALGDS | cna | hetloss | BASIS    |
| PD4826       | RALGDS | cna | gain    | BASIS    |
| PD5945       | RALGDS | cna | gain    | BASIS    |
| PD5948       | RALGDS | cna | gain    | BASIS    |
| PD6406       | RALGDS | cna | hetloss | BASIS    |
| PD6731       | RALGDS | cna | hetloss | BASIS    |
| PD7067       | RALGDS | cna | gain    | BASIS    |
| PD7215       | RALGDS | cna | gain    | BASIS    |
| PD8621       | RALGDS | cna | gain    | BASIS    |
| PD9004       | RALGDS | cna | hetloss | BASIS    |
| TCGA-AN-A0XU | RPL15  | cna | hetloss | TCGA     |
| TCGA-BH-A0C0 | RPL15  | cna | hetloss | TCGA     |
| TCGA-BH-A18R | RPL15  | cna | gain    | TCGA     |
| TCGA-BH-A1FU | RPL15  | cna | hetloss | TCGA     |
| TCGA-D8-A27M | RPL15  | cna | hetloss | TCGA     |
| TCGA-E9-A1NC | RPL15  | cna | hetloss | TCGA     |
| TCGA-LL-A5YP | RPL15  | cna | amp     | TCGA     |
| MB-2827      | RPL15  | cna | hetloss | METABRIC |
| MB-7038      | RPL15  | cna | hetloss | METABRIC |
| MB-7048      | RPL15  | cna | hetloss | METABRIC |
| MB-0420      | RPL15  | cna | hetloss | METABRIC |
| PD10014      | RPL15  | cna | hetloss | BASIS    |
| PD11327      | RPL15  | cna | hetloss | BASIS    |
| PD11742      | RPL15  | cna | gain    | BASIS    |
| PD13296      | RPL15  | cna | gain    | BASIS    |
| PD13297      | RPL15  | cna | hetloss | BASIS    |

|              |        |     |         |          |
|--------------|--------|-----|---------|----------|
| PD13299      | RPL15  | cna | gain    | BASIS    |
| PD13771      | RPL15  | cna | gain    | BASIS    |
| PD22355      | RPL15  | cna | hetloss | BASIS    |
| PD23561      | RPL15  | cna | hetloss | BASIS    |
| PD23562      | RPL15  | cna | gain    | BASIS    |
| PD23574      | RPL15  | cna | gain    | BASIS    |
| PD24202      | RPL15  | cna | hetloss | BASIS    |
| PD24206      | RPL15  | cna | gain    | BASIS    |
| PD24337      | RPL15  | cna | hetloss | BASIS    |
| PD3905       | RPL15  | cna | gain    | BASIS    |
| PD4006       | RPL15  | cna | hetloss | BASIS    |
| PD4826       | RPL15  | cna | gain    | BASIS    |
| PD5945       | RPL15  | cna | amp     | BASIS    |
| PD5948       | RPL15  | cna | gain    | BASIS    |
| PD6406       | RPL15  | cna | hetloss | BASIS    |
| PD6731       | RPL15  | cna | hetloss | BASIS    |
| PD8980       | RPL15  | cna | gain    | BASIS    |
| PD9585       | RPL15  | cna | hetloss | BASIS    |
| PD9702       | RPL15  | cna | gain    | BASIS    |
| TCGA-A2-A25B | SETBP1 | cna | hetloss | TCGA     |
| TCGA-AN-A0XU | SETBP1 | cna | hetloss | TCGA     |
| TCGA-AO-A0JL | SETBP1 | cna | gain    | TCGA     |
| TCGA-BH-A0AW | SETBP1 | cna | hetloss | TCGA     |
| TCGA-BH-A0C0 | SETBP1 | cna | gain    | TCGA     |
| TCGA-C8-A12L | SETBP1 | cna | gain    | TCGA     |
| TCGA-D8-A27M | SETBP1 | cna | hetloss | TCGA     |
| TCGA-E2-A1L7 | SETBP1 | cna | gain    | TCGA     |
| TCGA-LL-A5YP | SETBP1 | cna | hetloss | TCGA     |
| MB-0346      | SETBP1 | cna | hetloss | METABRIC |
| MB-6060      | SETBP1 | cna | gain    | METABRIC |
| PD10014      | SETBP1 | cna | hetloss | BASIS    |
| PD11327      | SETBP1 | cna | gain    | BASIS    |
| PD11742      | SETBP1 | cna | hetloss | BASIS    |
| PD13296      | SETBP1 | cna | hetloss | BASIS    |
| PD13297      | SETBP1 | cna | gain    | BASIS    |
| PD13299      | SETBP1 | cna | gain    | BASIS    |
| PD23574      | SETBP1 | cna | hetloss | BASIS    |
| PD24186      | SETBP1 | cna | gain    | BASIS    |
| PD24202      | SETBP1 | cna | hetloss | BASIS    |
| PD24337      | SETBP1 | cna | gain    | BASIS    |
| PD3905       | SETBP1 | cna | gain    | BASIS    |
| PD4005       | SETBP1 | cna | hetloss | BASIS    |
| PD4006       | SETBP1 | cna | gain    | BASIS    |
| PD4107       | SETBP1 | cna | gain    | BASIS    |
| PD4967       | SETBP1 | cna | hetloss | BASIS    |
| PD5930       | SETBP1 | cna | gain    | BASIS    |
| PD5945       | SETBP1 | cna | gain    | BASIS    |

|              |        |     |         |          |
|--------------|--------|-----|---------|----------|
| PD5948       | SETBP1 | cna | hetloss | BASIS    |
| PD6406       | SETBP1 | cna | gain    | BASIS    |
| PD7215       | SETBP1 | cna | gain    | BASIS    |
| PD8621       | SETBP1 | cna | hetloss | BASIS    |
| PD8980       | SETBP1 | cna | hetloss | BASIS    |
| PD9004       | SETBP1 | cna | gain    | BASIS    |
| PD9702       | SETBP1 | cna | gain    | BASIS    |
| TCGA-A2-A25B | SH2D1A | cna | hetloss | TCGA     |
| TCGA-AN-A0XU | SH2D1A | cna | hetloss | TCGA     |
| TCGA-BH-A0AW | SH2D1A | cna | gain    | TCGA     |
| TCGA-C8-A12L | SH2D1A | cna | gain    | TCGA     |
| TCGA-E2-A1L7 | SH2D1A | cna | hetloss | TCGA     |
| TCGA-E9-A1NC | SH2D1A | cna | hetloss | TCGA     |
| MB-0346      | SH2D1A | cna | hetloss | METABRIC |
| MB-2827      | SH2D1A | cna | hetloss | METABRIC |
| MB-5465      | SH2D1A | cna | hetloss | METABRIC |
| MB-6098      | SH2D1A | cna | hetloss | METABRIC |
| MB-7038      | SH2D1A | cna | gain    | METABRIC |
| PD10014      | SH2D1A | cna | hetloss | BASIS    |
| PD13296      | SH2D1A | cna | hetloss | BASIS    |
| PD13299      | SH2D1A | cna | amp     | BASIS    |
| PD13771      | SH2D1A | cna | gain    | BASIS    |
| PD14442      | SH2D1A | cna | gain    | BASIS    |
| PD23562      | SH2D1A | cna | hetloss | BASIS    |
| PD23574      | SH2D1A | cna | gain    | BASIS    |
| PD23578      | SH2D1A | cna | hetloss | BASIS    |
| PD24202      | SH2D1A | cna | hetloss | BASIS    |
| PD24206      | SH2D1A | cna | gain    | BASIS    |
| PD3905       | SH2D1A | cna | gain    | BASIS    |
| PD4107       | SH2D1A | cna | gain    | BASIS    |
| PD4826       | SH2D1A | cna | gain    | BASIS    |
| PD4967       | SH2D1A | cna | gain    | BASIS    |
| PD5930       | SH2D1A | cna | gain    | BASIS    |
| PD5935       | SH2D1A | cna | gain    | BASIS    |
| PD5945       | SH2D1A | cna | gain    | BASIS    |
| PD5948       | SH2D1A | cna | gain    | BASIS    |
| PD6406       | SH2D1A | cna | gain    | BASIS    |
| PD6413       | SH2D1A | cna | gain    | BASIS    |
| PD7215       | SH2D1A | cna | gain    | BASIS    |
| PD8621       | SH2D1A | cna | amp     | BASIS    |
| PD8980       | SH2D1A | cna | hetloss | BASIS    |
| PD9004       | SH2D1A | cna | gain    | BASIS    |
| TCGA-AO-A0JL | SNED1  | cna | hetloss | TCGA     |
| TCGA-BH-A0AW | SNED1  | cna | hetloss | TCGA     |
| TCGA-C8-A12L | SNED1  | cna | hetloss | TCGA     |
| TCGA-D8-A27M | SNED1  | cna | gain    | TCGA     |
| TCGA-E2-A1L7 | SNED1  | cna | hetloss | TCGA     |

|              |       |     |         |          |
|--------------|-------|-----|---------|----------|
| TCGA-E9-A1NC | SNED1 | cna | hetloss | TCGA     |
| MB-5107      | SNED1 | cna | hetloss | METABRIC |
| MB-6060      | SNED1 | cna | hetloss | METABRIC |
| MB-6098      | SNED1 | cna | hetloss | METABRIC |
| MB-6271      | SNED1 | cna | hetloss | METABRIC |
| MB-7048      | SNED1 | cna | hetloss | METABRIC |
| PD10014      | SNED1 | cna | gain    | BASIS    |
| PD11327      | SNED1 | cna | gain    | BASIS    |
| PD11742      | SNED1 | cna | hetloss | BASIS    |
| PD13296      | SNED1 | cna | hetloss | BASIS    |
| PD13297      | SNED1 | cna | hetloss | BASIS    |
| PD23578      | SNED1 | cna | hetloss | BASIS    |
| PD24186      | SNED1 | cna | gain    | BASIS    |
| PD24202      | SNED1 | cna | hetloss | BASIS    |
| PD24206      | SNED1 | cna | gain    | BASIS    |
| PD3890       | SNED1 | cna | hetloss | BASIS    |
| PD3905       | SNED1 | cna | gain    | BASIS    |
| PD4005       | SNED1 | cna | hetloss | BASIS    |
| PD4006       | SNED1 | cna | gain    | BASIS    |
| PD4967       | SNED1 | cna | hetloss | BASIS    |
| PD5935       | SNED1 | cna | gain    | BASIS    |
| PD5945       | SNED1 | cna | gain    | BASIS    |
| PD5948       | SNED1 | cna | gain    | BASIS    |
| PD6406       | SNED1 | cna | hetloss | BASIS    |
| PD6413       | SNED1 | cna | hetloss | BASIS    |
| PD6731       | SNED1 | cna | hetloss | BASIS    |
| PD7067       | SNED1 | cna | gain    | BASIS    |
| PD7215       | SNED1 | cna | gain    | BASIS    |
| PD8980       | SNED1 | cna | hetloss | BASIS    |
| PD9585       | SNED1 | cna | hetloss | BASIS    |
| TCGA-A2-A25B | SOX17 | cna | gain    | TCGA     |
| TCGA-AO-A0JL | SOX17 | cna | amp     | TCGA     |
| TCGA-BH-A0AW | SOX17 | cna | gain    | TCGA     |
| TCGA-BH-A0C0 | SOX17 | cna | gain    | TCGA     |
| TCGA-BH-A18R | SOX17 | cna | homdel  | TCGA     |
| TCGA-BH-A1FU | SOX17 | cna | gain    | TCGA     |
| TCGA-D8-A27M | SOX17 | cna | amp     | TCGA     |
| TCGA-E9-A1NC | SOX17 | cna | amp     | TCGA     |
| MB-0346      | SOX17 | cna | gain    | METABRIC |
| MB-5465      | SOX17 | cna | hetloss | METABRIC |
| MB-6060      | SOX17 | cna | amp     | METABRIC |
| MB-6098      | SOX17 | cna | gain    | METABRIC |
| PD10014      | SOX17 | cna | amp     | BASIS    |
| PD11327      | SOX17 | cna | gain    | BASIS    |
| PD13296      | SOX17 | cna | homdel  | BASIS    |
| PD13299      | SOX17 | cna | gain    | BASIS    |
| PD23562      | SOX17 | cna | gain    | BASIS    |

|              |       |     |         |          |
|--------------|-------|-----|---------|----------|
| PD23574      | SOX17 | cna | gain    | BASIS    |
| PD23578      | SOX17 | cna | hetloss | BASIS    |
| PD24186      | SOX17 | cna | gain    | BASIS    |
| PD24202      | SOX17 | cna | hetloss | BASIS    |
| PD24206      | SOX17 | cna | gain    | BASIS    |
| PD3905       | SOX17 | cna | gain    | BASIS    |
| PD4005       | SOX17 | cna | hetloss | BASIS    |
| PD4006       | SOX17 | cna | gain    | BASIS    |
| PD4826       | SOX17 | cna | amp     | BASIS    |
| PD5935       | SOX17 | cna | gain    | BASIS    |
| PD5945       | SOX17 | cna | gain    | BASIS    |
| PD7067       | SOX17 | cna | amp     | BASIS    |
| PD7215       | SOX17 | cna | amp     | BASIS    |
| PD8621       | SOX17 | cna | gain    | BASIS    |
| PD8980       | SOX17 | cna | gain    | BASIS    |
| PD9004       | SOX17 | cna | gain    | BASIS    |
| PD9585       | SOX17 | cna | hetloss | BASIS    |
| PD9702       | SOX17 | cna | gain    | BASIS    |
| TCGA-A2-A25B | SPEN  | cna | hetloss | TCGA     |
| TCGA-AN-A0XU | SPEN  | cna | hetloss | TCGA     |
| TCGA-AO-A0JL | SPEN  | cna | hetloss | TCGA     |
| TCGA-BH-A0AW | SPEN  | cna | gain    | TCGA     |
| TCGA-BH-A0C0 | SPEN  | cna | hetloss | TCGA     |
| TCGA-BH-A18R | SPEN  | cna | homdel  | TCGA     |
| TCGA-BH-A1FU | SPEN  | cna | gain    | TCGA     |
| TCGA-C8-A12L | SPEN  | cna | hetloss | TCGA     |
| TCGA-D8-A27M | SPEN  | cna | gain    | TCGA     |
| TCGA-E2-A1L7 | SPEN  | cna | hetloss | TCGA     |
| TCGA-E9-A1NC | SPEN  | cna | hetloss | TCGA     |
| TCGA-LL-A5YP | SPEN  | cna | hetloss | TCGA     |
| MB-2827      | SPEN  | cna | hetloss | METABRIC |
| MB-5070      | SPEN  | cna | hetloss | METABRIC |
| MB-5465      | SPEN  | cna | hetloss | METABRIC |
| MB-6060      | SPEN  | cna | hetloss | METABRIC |
| MB-6098      | SPEN  | cna | hetloss | METABRIC |
| MB-0420      | SPEN  | cna | hetloss | METABRIC |
| PD10014      | SPEN  | cna | gain    | BASIS    |
| PD11327      | SPEN  | cna | hetloss | BASIS    |
| PD11742      | SPEN  | cna | hetloss | BASIS    |
| PD13296      | SPEN  | cna | hetloss | BASIS    |
| PD13771      | SPEN  | cna | hetloss | BASIS    |
| PD22355      | SPEN  | cna | hetloss | BASIS    |
| PD24202      | SPEN  | cna | hetloss | BASIS    |
| PD24206      | SPEN  | cna | gain    | BASIS    |
| PD24337      | SPEN  | cna | hetloss | BASIS    |
| PD3890       | SPEN  | cna | hetloss | BASIS    |
| PD3905       | SPEN  | cna | gain    | BASIS    |

|              |       |     |         |          |
|--------------|-------|-----|---------|----------|
| PD4826       | SPEN  | cna | gain    | BASIS    |
| PD5945       | SPEN  | cna | gain    | BASIS    |
| PD6406       | SPEN  | cna | hetloss | BASIS    |
| PD7067       | SPEN  | cna | gain    | BASIS    |
| PD7215       | SPEN  | cna | gain    | BASIS    |
| PD9004       | SPEN  | cna | hetloss | BASIS    |
| TCGA-AN-A0XU | SS18  | cna | hetloss | TCGA     |
| TCGA-AO-A0JL | SS18  | cna | gain    | TCGA     |
| TCGA-BH-A0AW | SS18  | cna | hetloss | TCGA     |
| TCGA-BH-A0C0 | SS18  | cna | gain    | TCGA     |
| TCGA-C8-A12L | SS18  | cna | gain    | TCGA     |
| TCGA-D8-A27M | SS18  | cna | hetloss | TCGA     |
| TCGA-E2-A1L7 | SS18  | cna | gain    | TCGA     |
| TCGA-LL-A5YP | SS18  | cna | amp     | TCGA     |
| MB-0346      | SS18  | cna | hetloss | METABRIC |
| MB-2827      | SS18  | cna | hetloss | METABRIC |
| MB-5465      | SS18  | cna | hetloss | METABRIC |
| PD10014      | SS18  | cna | gain    | BASIS    |
| PD11327      | SS18  | cna | amp     | BASIS    |
| PD13297      | SS18  | cna | gain    | BASIS    |
| PD13299      | SS18  | cna | gain    | BASIS    |
| PD22355      | SS18  | cna | hetloss | BASIS    |
| PD23574      | SS18  | cna | gain    | BASIS    |
| PD24186      | SS18  | cna | gain    | BASIS    |
| PD24202      | SS18  | cna | hetloss | BASIS    |
| PD24206      | SS18  | cna | gain    | BASIS    |
| PD24337      | SS18  | cna | gain    | BASIS    |
| PD3905       | SS18  | cna | gain    | BASIS    |
| PD4006       | SS18  | cna | gain    | BASIS    |
| PD4107       | SS18  | cna | gain    | BASIS    |
| PD4967       | SS18  | cna | hetloss | BASIS    |
| PD5930       | SS18  | cna | gain    | BASIS    |
| PD5935       | SS18  | cna | hetloss | BASIS    |
| PD5945       | SS18  | cna | gain    | BASIS    |
| PD5948       | SS18  | cna | amp     | BASIS    |
| PD6406       | SS18  | cna | gain    | BASIS    |
| PD7067       | SS18  | cna | gain    | BASIS    |
| PD7215       | SS18  | cna | gain    | BASIS    |
| PD8980       | SS18  | cna | hetloss | BASIS    |
| PD9004       | SS18  | cna | gain    | BASIS    |
| PD9702       | SS18  | cna | gain    | BASIS    |
| TCGA-A2-A25B | SUZ12 | cna | hetloss | TCGA     |
| TCGA-AN-A0XU | SUZ12 | cna | gain    | TCGA     |
| TCGA-AO-A0JL | SUZ12 | cna | gain    | TCGA     |
| TCGA-BH-A0AW | SUZ12 | cna | homdel  | TCGA     |
| TCGA-BH-A0C0 | SUZ12 | cna | gain    | TCGA     |
| TCGA-BH-A18R | SUZ12 | cna | homdel  | TCGA     |

|              |         |     |         |          |
|--------------|---------|-----|---------|----------|
| TCGA-C8-A12L | SUZ12   | cna | gain    | TCGA     |
| TCGA-D8-A27M | SUZ12   | cna | hetloss | TCGA     |
| TCGA-E2-A1L7 | SUZ12   | cna | hetloss | TCGA     |
| TCGA-E9-A1NC | SUZ12   | cna | hetloss | TCGA     |
| MB-0346      | SUZ12   | cna | hetloss | METABRIC |
| MB-2827      | SUZ12   | cna | homdel  | METABRIC |
| MB-5070      | SUZ12   | cna | gain    | METABRIC |
| MB-5465      | SUZ12   | cna | hetloss | METABRIC |
| MB-6098      | SUZ12   | cna | hetloss | METABRIC |
| MB-6271      | SUZ12   | cna | hetloss | METABRIC |
| MB-7038      | SUZ12   | cna | hetloss | METABRIC |
| MB-0420      | SUZ12   | cna | hetloss | METABRIC |
| PD11742      | SUZ12   | cna | hetloss | BASIS    |
| PD13297      | SUZ12   | cna | hetloss | BASIS    |
| PD22355      | SUZ12   | cna | hetloss | BASIS    |
| PD23561      | SUZ12   | cna | hetloss | BASIS    |
| PD24337      | SUZ12   | cna | hetloss | BASIS    |
| PD3890       | SUZ12   | cna | hetloss | BASIS    |
| PD4005       | SUZ12   | cna | hetloss | BASIS    |
| PD4967       | SUZ12   | cna | hetloss | BASIS    |
| PD5945       | SUZ12   | cna | gain    | BASIS    |
| PD6406       | SUZ12   | cna | hetloss | BASIS    |
| PD6413       | SUZ12   | cna | hetloss | BASIS    |
| PD6731       | SUZ12   | cna | hetloss | BASIS    |
| PD7067       | SUZ12   | cna | gain    | BASIS    |
| PD7215       | SUZ12   | cna | gain    | BASIS    |
| PD9004       | SUZ12   | cna | gain    | BASIS    |
| PD9585       | SUZ12   | cna | hetloss | BASIS    |
| PD9702       | SUZ12   | cna | gain    | BASIS    |
| TCGA-A2-A25B | TMPRSS2 | cna | hetloss | TCGA     |
| TCGA-BH-A0AW | TMPRSS2 | cna | gain    | TCGA     |
| TCGA-BH-A0C0 | TMPRSS2 | cna | hetloss | TCGA     |
| TCGA-BH-A1FU | TMPRSS2 | cna | gain    | TCGA     |
| TCGA-C8-A12L | TMPRSS2 | cna | hetloss | TCGA     |
| TCGA-D8-A27M | TMPRSS2 | cna | hetloss | TCGA     |
| TCGA-LL-A5YP | TMPRSS2 | cna | gain    | TCGA     |
| MB-0346      | TMPRSS2 | cna | gain    | METABRIC |
| MB-2827      | TMPRSS2 | cna | amp     | METABRIC |
| MB-6098      | TMPRSS2 | cna | hetloss | METABRIC |
| MB-7048      | TMPRSS2 | cna | hetloss | METABRIC |
| PD10014      | TMPRSS2 | cna | hetloss | BASIS    |
| PD11327      | TMPRSS2 | cna | gain    | BASIS    |
| PD13296      | TMPRSS2 | cna | gain    | BASIS    |
| PD13297      | TMPRSS2 | cna | hetloss | BASIS    |
| PD13771      | TMPRSS2 | cna | gain    | BASIS    |
| PD23562      | TMPRSS2 | cna | gain    | BASIS    |
| PD23574      | TMPRSS2 | cna | gain    | BASIS    |

|                   |         |     |         |            |
|-------------------|---------|-----|---------|------------|
| PD23578           | TMPRSS2 | cna | gain    | BASIS      |
| PD24186           | TMPRSS2 | cna | gain    | BASIS      |
| PD24206           | TMPRSS2 | cna | gain    | BASIS      |
| PD3890            | TMPRSS2 | cna | hetloss | BASIS      |
| PD3905            | TMPRSS2 | cna | gain    | BASIS      |
| PD4107            | TMPRSS2 | cna | gain    | BASIS      |
| PD4826            | TMPRSS2 | cna | gain    | BASIS      |
| PD5930            | TMPRSS2 | cna | gain    | BASIS      |
| PD5945            | TMPRSS2 | cna | gain    | BASIS      |
| PD5948            | TMPRSS2 | cna | gain    | BASIS      |
| PD6731            | TMPRSS2 | cna | gain    | BASIS      |
| PD7067            | TMPRSS2 | cna | gain    | BASIS      |
| PD7215            | TMPRSS2 | cna | gain    | BASIS      |
| PD8621            | TMPRSS2 | cna | gain    | BASIS      |
| PD8980            | TMPRSS2 | cna | homdel  | BASIS      |
| PD9004            | TMPRSS2 | cna | gain    | BASIS      |
| PD9702            | TMPRSS2 | cna | gain    | BASIS      |
| TCGA-A2-A25B      | TOP1    | cna | gain    | TCGA       |
| TCGA-AO-A0JL      | TOP1    | cna | gain    | TCGA       |
| TCGA-BH-A0AW      | TOP1    | cna | gain    | TCGA       |
| TCGA-BH-A0C0      | TOP1    | cna | gain    | TCGA       |
| TCGA-C8-A12L      | TOP1    | cna | gain    | TCGA       |
| TCGA-D8-A27M      | TOP1    | cna | gain    | TCGA       |
| TCGA-E2-A1L7      | TOP1    | cna | gain    | TCGA       |
| TCGA-E9-A1NC      | TOP1    | cna | hetloss | TCGA       |
| TCGA-LL-A5YP      | TOP1    | cna | hetloss | TCGA       |
| MB-0346           | TOP1    | cna | gain    | METABRIC   |
| MB-5107           | TOP1    | cna | gain    | METABRIC   |
| MB-6060           | TOP1    | cna | gain    | METABRIC   |
| MB-6098           | TOP1    | cna | hetloss | METABRIC   |
| P-0002858-T01-IM3 | TOP1    | cna | amp     | MSK-IMPACT |
| PD13296           | TOP1    | cna | hetloss | BASIS      |
| PD13297           | TOP1    | cna | hetloss | BASIS      |
| PD13771           | TOP1    | cna | gain    | BASIS      |
| PD22355           | TOP1    | cna | hetloss | BASIS      |
| PD23578           | TOP1    | cna | hetloss | BASIS      |
| PD24186           | TOP1    | cna | gain    | BASIS      |
| PD24202           | TOP1    | cna | hetloss | BASIS      |
| PD24206           | TOP1    | cna | gain    | BASIS      |
| PD3905            | TOP1    | cna | gain    | BASIS      |
| PD4005            | TOP1    | cna | hetloss | BASIS      |
| PD4826            | TOP1    | cna | gain    | BASIS      |
| PD5935            | TOP1    | cna | gain    | BASIS      |
| PD5945            | TOP1    | cna | amp     | BASIS      |
| PD5948            | TOP1    | cna | gain    | BASIS      |
| PD6731            | TOP1    | cna | hetloss | BASIS      |
| PD7067            | TOP1    | cna | gain    | BASIS      |



|              |           |     |         |          |
|--------------|-----------|-----|---------|----------|
| PD7215       | TOP1      | cna | gain    | BASIS    |
| PD8621       | TOP1      | cna | hetloss | BASIS    |
| PD8980       | TOP1      | cna | gain    | BASIS    |
| PD9004       | TOP1      | cna | gain    | BASIS    |
| PD9585       | TOP1      | cna | hetloss | BASIS    |
| TCGA-A2-A25B | UHRF1BP1L | cna | gain    | TCGA     |
| TCGA-AO-A0JL | UHRF1BP1L | cna | hetloss | TCGA     |
| TCGA-BH-A0AW | UHRF1BP1L | cna | hetloss | TCGA     |
| TCGA-BH-A0C0 | UHRF1BP1L | cna | hetloss | TCGA     |
| TCGA-BH-A18R | UHRF1BP1L | cna | gain    | TCGA     |
| TCGA-BH-A1FU | UHRF1BP1L | cna | hetloss | TCGA     |
| TCGA-C8-A12L | UHRF1BP1L | cna | gain    | TCGA     |
| TCGA-D8-A27M | UHRF1BP1L | cna | hetloss | TCGA     |
| TCGA-E2-A1L7 | UHRF1BP1L | cna | hetloss | TCGA     |
| TCGA-LL-A5YP | UHRF1BP1L | cna | hetloss | TCGA     |
| MB-0346      | UHRF1BP1L | cna | hetloss | METABRIC |
| MB-2827      | UHRF1BP1L | cna | hetloss | METABRIC |
| MB-5070      | UHRF1BP1L | cna | hetloss | METABRIC |
| MB-5107      | UHRF1BP1L | cna | gain    | METABRIC |
| MB-5465      | UHRF1BP1L | cna | gain    | METABRIC |
| MB-6098      | UHRF1BP1L | cna | hetloss | METABRIC |
| PD10014      | UHRF1BP1L | cna | gain    | BASIS    |
| PD11742      | UHRF1BP1L | cna | hetloss | BASIS    |
| PD13296      | UHRF1BP1L | cna | hetloss | BASIS    |
| PD13297      | UHRF1BP1L | cna | gain    | BASIS    |
| PD22355      | UHRF1BP1L | cna | hetloss | BASIS    |
| PD3890       | UHRF1BP1L | cna | hetloss | BASIS    |
| PD4005       | UHRF1BP1L | cna | hetloss | BASIS    |
| PD4006       | UHRF1BP1L | cna | gain    | BASIS    |
| PD4107       | UHRF1BP1L | cna | gain    | BASIS    |
| PD4826       | UHRF1BP1L | cna | gain    | BASIS    |
| PD5945       | UHRF1BP1L | cna | gain    | BASIS    |
| PD6406       | UHRF1BP1L | cna | hetloss | BASIS    |
| PD6413       | UHRF1BP1L | cna | hetloss | BASIS    |
| PD7067       | UHRF1BP1L | cna | gain    | BASIS    |
| PD7215       | UHRF1BP1L | cna | hetloss | BASIS    |
| PD8621       | UHRF1BP1L | cna | hetloss | BASIS    |
| PD9004       | UHRF1BP1L | cna | hetloss | BASIS    |
| PD9585       | UHRF1BP1L | cna | hetloss | BASIS    |
| PD9702       | UHRF1BP1L | cna | gain    | BASIS    |
| TCGA-A2-A25B | USP6      | cna | hetloss | TCGA     |
| TCGA-AN-A0XU | USP6      | cna | hetloss | TCGA     |
| TCGA-AO-A0JL | USP6      | cna | gain    | TCGA     |
| TCGA-BH-A0AW | USP6      | cna | hetloss | TCGA     |
| TCGA-BH-A0C0 | USP6      | cna | hetloss | TCGA     |
| TCGA-C8-A12L | USP6      | cna | hetloss | TCGA     |
| TCGA-D8-A27M | USP6      | cna | hetloss | TCGA     |

|              |      |     |         |          |
|--------------|------|-----|---------|----------|
| TCGA-E2-A1L7 | USP6 | cna | hetloss | TCGA     |
| TCGA-E9-A1NC | USP6 | cna | hetloss | TCGA     |
| TCGA-LL-A5YP | USP6 | cna | gain    | TCGA     |
| MB-0346      | USP6 | cna | hetloss | METABRIC |
| MB-2827      | USP6 | cna | hetloss | METABRIC |
| MB-5107      | USP6 | cna | hetloss | METABRIC |
| MB-6271      | USP6 | cna | hetloss | METABRIC |
| MB-7032      | USP6 | cna | gain    | METABRIC |
| MB-7048      | USP6 | cna | hetloss | METABRIC |
| MB-0420      | USP6 | cna | hetloss | METABRIC |
| PD10014      | USP6 | cna | hetloss | BASIS    |
| PD11742      | USP6 | cna | hetloss | BASIS    |
| PD13296      | USP6 | cna | hetloss | BASIS    |
| PD13771      | USP6 | cna | hetloss | BASIS    |
| PD24202      | USP6 | cna | hetloss | BASIS    |
| PD24206      | USP6 | cna | hetloss | BASIS    |
| PD24337      | USP6 | cna | hetloss | BASIS    |
| PD3890       | USP6 | cna | hetloss | BASIS    |
| PD3905       | USP6 | cna | gain    | BASIS    |
| PD4005       | USP6 | cna | hetloss | BASIS    |
| PD4826       | USP6 | cna | hetloss | BASIS    |
| PD4967       | USP6 | cna | hetloss | BASIS    |
| PD5945       | USP6 | cna | gain    | BASIS    |
| PD6406       | USP6 | cna | hetloss | BASIS    |
| PD6413       | USP6 | cna | hetloss | BASIS    |
| PD6731       | USP6 | cna | hetloss | BASIS    |
| PD7067       | USP6 | cna | gain    | BASIS    |
| PD9585       | USP6 | cna | hetloss | BASIS    |
| TCGA-AN-A0XU | VHL  | cna | gain    | TCGA     |
| TCGA-BH-A0C0 | VHL  | cna | gain    | TCGA     |
| TCGA-BH-A18R | VHL  | cna | gain    | TCGA     |
| TCGA-BH-A1FU | VHL  | cna | hetloss | TCGA     |
| TCGA-D8-A27M | VHL  | cna | hetloss | TCGA     |
| TCGA-E9-A1NC | VHL  | cna | hetloss | TCGA     |
| TCGA-LL-A5YP | VHL  | cna | amp     | TCGA     |
| MB-7038      | VHL  | cna | hetloss | METABRIC |
| MB-7048      | VHL  | cna | hetloss | METABRIC |
| MB-0420      | VHL  | cna | hetloss | METABRIC |
| PD10014      | VHL  | cna | hetloss | BASIS    |
| PD11327      | VHL  | cna | gain    | BASIS    |
| PD11742      | VHL  | cna | gain    | BASIS    |
| PD13296      | VHL  | cna | gain    | BASIS    |
| PD13299      | VHL  | cna | gain    | BASIS    |
| PD13771      | VHL  | cna | gain    | BASIS    |
| PD23561      | VHL  | cna | hetloss | BASIS    |
| PD23562      | VHL  | cna | gain    | BASIS    |
| PD23574      | VHL  | cna | gain    | BASIS    |

|              |       |     |         |          |
|--------------|-------|-----|---------|----------|
| PD23578      | VHL   | cna | gain    | BASIS    |
| PD24186      | VHL   | cna | amp     | BASIS    |
| PD24206      | VHL   | cna | gain    | BASIS    |
| PD3905       | VHL   | cna | gain    | BASIS    |
| PD4006       | VHL   | cna | gain    | BASIS    |
| PD4826       | VHL   | cna | gain    | BASIS    |
| PD5945       | VHL   | cna | amp     | BASIS    |
| PD5948       | VHL   | cna | gain    | BASIS    |
| PD6406       | VHL   | cna | hetloss | BASIS    |
| PD6731       | VHL   | cna | hetloss | BASIS    |
| PD7067       | VHL   | cna | gain    | BASIS    |
| PD7215       | VHL   | cna | gain    | BASIS    |
| PD8980       | VHL   | cna | gain    | BASIS    |
| PD9004       | VHL   | cna | gain    | BASIS    |
| PD9585       | VHL   | cna | hetloss | BASIS    |
| PD9702       | VHL   | cna | gain    | BASIS    |
| TCGA-AN-A0XU | WHSC1 | cna | hetloss | TCGA     |
| TCGA-BH-A0AW | WHSC1 | cna | hetloss | TCGA     |
| TCGA-BH-A0C0 | WHSC1 | cna | hetloss | TCGA     |
| TCGA-BH-A1FU | WHSC1 | cna | hetloss | TCGA     |
| TCGA-C8-A12L | WHSC1 | cna | gain    | TCGA     |
| TCGA-D8-A27M | WHSC1 | cna | amp     | TCGA     |
| TCGA-E9-A1NC | WHSC1 | cna | hetloss | TCGA     |
| TCGA-LL-A5YP | WHSC1 | cna | hetloss | TCGA     |
| MB-0346      | WHSC1 | cna | hetloss | METABRIC |
| MB-2827      | WHSC1 | cna | hetloss | METABRIC |
| MB-5070      | WHSC1 | cna | gain    | METABRIC |
| MB-5465      | WHSC1 | cna | hetloss | METABRIC |
| MB-6060      | WHSC1 | cna | hetloss | METABRIC |
| MB-6098      | WHSC1 | cna | hetloss | METABRIC |
| MB-7038      | WHSC1 | cna | gain    | METABRIC |
| MTS-T0064    | WHSC1 | cna | homdel  | METABRIC |
| PD10014      | WHSC1 | cna | hetloss | BASIS    |
| PD11327      | WHSC1 | cna | gain    | BASIS    |
| PD13296      | WHSC1 | cna | hetloss | BASIS    |
| PD13297      | WHSC1 | cna | hetloss | BASIS    |
| PD24186      | WHSC1 | cna | gain    | BASIS    |
| PD24202      | WHSC1 | cna | hetloss | BASIS    |
| PD24206      | WHSC1 | cna | gain    | BASIS    |
| PD3890       | WHSC1 | cna | hetloss | BASIS    |
| PD3905       | WHSC1 | cna | gain    | BASIS    |
| PD4005       | WHSC1 | cna | hetloss | BASIS    |
| PD4006       | WHSC1 | cna | gain    | BASIS    |
| PD4826       | WHSC1 | cna | hetloss | BASIS    |
| PD5945       | WHSC1 | cna | gain    | BASIS    |
| PD6406       | WHSC1 | cna | hetloss | BASIS    |
| PD6413       | WHSC1 | cna | hetloss | BASIS    |

|              |       |     |         |          |
|--------------|-------|-----|---------|----------|
| PD7067       | WHSC1 | cna | gain    | BASIS    |
| PD8621       | WHSC1 | cna | gain    | BASIS    |
| PD8980       | WHSC1 | cna | hetloss | BASIS    |
| PD9585       | WHSC1 | cna | hetloss | BASIS    |
| TCGA-AN-A0XU | WVOX  | cna | gain    | TCGA     |
| TCGA-AO-A0JL | WVOX  | cna | gain    | TCGA     |
| TCGA-BH-A0AW | WVOX  | cna | hetloss | TCGA     |
| TCGA-BH-A0C0 | WVOX  | cna | hetloss | TCGA     |
| TCGA-C8-A12L | WVOX  | cna | hetloss | TCGA     |
| TCGA-D8-A27M | WVOX  | cna | gain    | TCGA     |
| TCGA-E2-A1L7 | WVOX  | cna | hetloss | TCGA     |
| TCGA-E9-A1NC | WVOX  | cna | hetloss | TCGA     |
| TCGA-LL-A5YP | WVOX  | cna | gain    | TCGA     |
| MB-0346      | WVOX  | cna | gain    | METABRIC |
| MB-5070      | WVOX  | cna | amp     | METABRIC |
| MB-5107      | WVOX  | cna | hetloss | METABRIC |
| MB-6271      | WVOX  | cna | hetloss | METABRIC |
| MB-7032      | WVOX  | cna | gain    | METABRIC |
| MB-7038      | WVOX  | cna | gain    | METABRIC |
| MB-0420      | WVOX  | cna | hetloss | METABRIC |
| PD10014      | WVOX  | cna | hetloss | BASIS    |
| PD11327      | WVOX  | cna | gain    | BASIS    |
| PD11742      | WVOX  | cna | hetloss | BASIS    |
| PD13297      | WVOX  | cna | hetloss | BASIS    |
| PD13299      | WVOX  | cna | gain    | BASIS    |
| PD14442      | WVOX  | cna | hetloss | BASIS    |
| PD23562      | WVOX  | cna | gain    | BASIS    |
| PD24186      | WVOX  | cna | gain    | BASIS    |
| PD24202      | WVOX  | cna | hetloss | BASIS    |
| PD24206      | WVOX  | cna | hetloss | BASIS    |
| PD3890       | WVOX  | cna | gain    | BASIS    |
| PD4005       | WVOX  | cna | hetloss | BASIS    |
| PD4006       | WVOX  | cna | hetloss | BASIS    |
| PD4107       | WVOX  | cna | gain    | BASIS    |
| PD4967       | WVOX  | cna | hetloss | BASIS    |
| PD5945       | WVOX  | cna | amp     | BASIS    |
| PD7215       | WVOX  | cna | gain    | BASIS    |
| PD9585       | WVOX  | cna | hetloss | BASIS    |
| PD9702       | WVOX  | cna | gain    | BASIS    |
| TCGA-AN-A0XU | ZFH3  | cna | gain    | TCGA     |
| TCGA-AO-A0JL | ZFH3  | cna | gain    | TCGA     |
| TCGA-BH-A0C0 | ZFH3  | cna | hetloss | TCGA     |
| TCGA-C8-A12L | ZFH3  | cna | hetloss | TCGA     |
| TCGA-D8-A27M | ZFH3  | cna | gain    | TCGA     |
| TCGA-E2-A1L7 | ZFH3  | cna | hetloss | TCGA     |
| TCGA-E9-A1NC | ZFH3  | cna | hetloss | TCGA     |
| TCGA-LL-A5YP | ZFH3  | cna | gain    | TCGA     |

|              |       |     |         |          |
|--------------|-------|-----|---------|----------|
| MB-0346      | ZFH3  | cna | gain    | METABRIC |
| MB-5107      | ZFH3  | cna | hetloss | METABRIC |
| MB-6271      | ZFH3  | cna | hetloss | METABRIC |
| MB-7032      | ZFH3  | cna | gain    | METABRIC |
| MB-7038      | ZFH3  | cna | gain    | METABRIC |
| MB-7048      | ZFH3  | cna | hetloss | METABRIC |
| MB-0420      | ZFH3  | cna | hetloss | METABRIC |
| MTS-T0064    | ZFH3  | cna | hetloss | METABRIC |
| PD10014      | ZFH3  | cna | hetloss | BASIS    |
| PD11742      | ZFH3  | cna | hetloss | BASIS    |
| PD13297      | ZFH3  | cna | hetloss | BASIS    |
| PD13299      | ZFH3  | cna | gain    | BASIS    |
| PD14442      | ZFH3  | cna | hetloss | BASIS    |
| PD23562      | ZFH3  | cna | gain    | BASIS    |
| PD24186      | ZFH3  | cna | gain    | BASIS    |
| PD24202      | ZFH3  | cna | hetloss | BASIS    |
| PD24206      | ZFH3  | cna | gain    | BASIS    |
| PD3890       | ZFH3  | cna | gain    | BASIS    |
| PD3905       | ZFH3  | cna | gain    | BASIS    |
| PD4005       | ZFH3  | cna | hetloss | BASIS    |
| PD4967       | ZFH3  | cna | homdel  | BASIS    |
| PD5945       | ZFH3  | cna | gain    | BASIS    |
| PD5948       | ZFH3  | cna | hetloss | BASIS    |
| PD6413       | ZFH3  | cna | hetloss | BASIS    |
| PD7215       | ZFH3  | cna | gain    | BASIS    |
| PD9585       | ZFH3  | cna | hetloss | BASIS    |
| PD9702       | ZFH3  | cna | gain    | BASIS    |
| TCGA-A2-A25B | ZRSR2 | cna | gain    | TCGA     |
| TCGA-AN-A0XU | ZRSR2 | cna | hetloss | TCGA     |
| TCGA-AO-A0JL | ZRSR2 | cna | gain    | TCGA     |
| TCGA-BH-A0AW | ZRSR2 | cna | gain    | TCGA     |
| TCGA-E2-A1L7 | ZRSR2 | cna | hetloss | TCGA     |
| TCGA-E9-A1NC | ZRSR2 | cna | hetloss | TCGA     |
| TCGA-LL-A5YP | ZRSR2 | cna | hetloss | TCGA     |
| MB-0346      | ZRSR2 | cna | gain    | METABRIC |
| MB-2827      | ZRSR2 | cna | hetloss | METABRIC |
| MB-5465      | ZRSR2 | cna | amp     | METABRIC |
| MB-6098      | ZRSR2 | cna | hetloss | METABRIC |
| MB-0420      | ZRSR2 | cna | hetloss | METABRIC |
| PD10014      | ZRSR2 | cna | hetloss | BASIS    |
| PD11327      | ZRSR2 | cna | hetloss | BASIS    |
| PD11742      | ZRSR2 | cna | gain    | BASIS    |
| PD13296      | ZRSR2 | cna | amp     | BASIS    |
| PD13297      | ZRSR2 | cna | gain    | BASIS    |
| PD13299      | ZRSR2 | cna | gain    | BASIS    |
| PD13771      | ZRSR2 | cna | gain    | BASIS    |
| PD14442      | ZRSR2 | cna | gain    | BASIS    |

|              |       |     |         |       |
|--------------|-------|-----|---------|-------|
| PD23562      | ZRSR2 | cna | hetloss | BASIS |
| PD23574      | ZRSR2 | cna | gain    | BASIS |
| PD3905       | ZRSR2 | cna | gain    | BASIS |
| PD4005       | ZRSR2 | cna | hetloss | BASIS |
| PD4006       | ZRSR2 | cna | hetloss | BASIS |
| PD4107       | ZRSR2 | cna | hetloss | BASIS |
| PD4826       | ZRSR2 | cna | gain    | BASIS |
| PD4967       | ZRSR2 | cna | gain    | BASIS |
| PD5935       | ZRSR2 | cna | gain    | BASIS |
| PD6406       | ZRSR2 | cna | gain    | BASIS |
| PD6413       | ZRSR2 | cna | gain    | BASIS |
| PD7215       | ZRSR2 | cna | amp     | BASIS |
| PD8621       | ZRSR2 | cna | gain    | BASIS |
| PD9004       | ZRSR2 | cna | gain    | BASIS |
| PD9702       | ZRSR2 | cna | hetloss | BASIS |
| TCGA-A2-A25B | SEPT6 | cna | hetloss | TCGA  |
| TCGA-AN-A0XU | SEPT6 | cna | hetloss | TCGA  |
| TCGA-BH-A0AW | SEPT6 | cna | gain    | TCGA  |
| TCGA-C8-A12L | SEPT6 | cna | gain    | TCGA  |
| TCGA-E2-A1L7 | SEPT6 | cna | hetloss | TCGA  |
| TCGA-E9-A1NC | SEPT6 | cna | hetloss | TCGA  |
| PD10014      | SEPT6 | cna | hetloss | BASIS |
| PD11327      | SEPT6 | cna | homdel  | BASIS |
| PD13296      | SEPT6 | cna | hetloss | BASIS |
| PD13299      | SEPT6 | cna | amp     | BASIS |
| PD13771      | SEPT6 | cna | gain    | BASIS |
| PD14442      | SEPT6 | cna | gain    | BASIS |
| PD23562      | SEPT6 | cna | hetloss | BASIS |
| PD23574      | SEPT6 | cna | gain    | BASIS |
| PD23578      | SEPT6 | cna | hetloss | BASIS |
| PD24202      | SEPT6 | cna | hetloss | BASIS |
| PD24206      | SEPT6 | cna | homdel  | BASIS |
| PD3905       | SEPT6 | cna | gain    | BASIS |
| PD4005       | SEPT6 | cna | gain    | BASIS |
| PD4006       | SEPT6 | cna | gain    | BASIS |
| PD4107       | SEPT6 | cna | gain    | BASIS |
| PD4826       | SEPT6 | cna | gain    | BASIS |
| PD4967       | SEPT6 | cna | gain    | BASIS |
| PD5930       | SEPT6 | cna | gain    | BASIS |
| PD5935       | SEPT6 | cna | gain    | BASIS |
| PD5945       | SEPT6 | cna | gain    | BASIS |
| PD5948       | SEPT6 | cna | gain    | BASIS |
| PD6406       | SEPT6 | cna | gain    | BASIS |
| PD6413       | SEPT6 | cna | gain    | BASIS |
| PD7067       | SEPT6 | cna | gain    | BASIS |
| PD7215       | SEPT6 | cna | gain    | BASIS |
| PD8621       | SEPT6 | cna | amp     | BASIS |

|              |        |     |         |          |
|--------------|--------|-----|---------|----------|
| PD8980       | SEPT6  | cna | hetloss | BASIS    |
| PD9004       | SEPT6  | cna | gain    | BASIS    |
| TCGA-AO-A0JL | ACVR2A | cna | gain    | TCGA     |
| TCGA-D8-A27M | ACVR2A | cna | gain    | TCGA     |
| TCGA-E9-A1NC | ACVR2A | cna | gain    | TCGA     |
| TCGA-LL-A5YP | ACVR2A | cna | hetloss | TCGA     |
| MB-2827      | ACVR2A | cna | hetloss | METABRIC |
| MB-5107      | ACVR2A | cna | hetloss | METABRIC |
| MB-6098      | ACVR2A | cna | hetloss | METABRIC |
| MB-6271      | ACVR2A | cna | hetloss | METABRIC |
| PD11327      | ACVR2A | cna | gain    | BASIS    |
| PD11742      | ACVR2A | cna | hetloss | BASIS    |
| PD13297      | ACVR2A | cna | hetloss | BASIS    |
| PD13299      | ACVR2A | cna | gain    | BASIS    |
| PD22355      | ACVR2A | cna | hetloss | BASIS    |
| PD23574      | ACVR2A | cna | gain    | BASIS    |
| PD23578      | ACVR2A | cna | hetloss | BASIS    |
| PD24186      | ACVR2A | cna | gain    | BASIS    |
| PD24202      | ACVR2A | cna | hetloss | BASIS    |
| PD24206      | ACVR2A | cna | gain    | BASIS    |
| PD24337      | ACVR2A | cna | hetloss | BASIS    |
| PD3890       | ACVR2A | cna | hetloss | BASIS    |
| PD3905       | ACVR2A | cna | gain    | BASIS    |
| PD4005       | ACVR2A | cna | hetloss | BASIS    |
| PD4006       | ACVR2A | cna | hetloss | BASIS    |
| PD4107       | ACVR2A | cna | gain    | BASIS    |
| PD4967       | ACVR2A | cna | hetloss | BASIS    |
| PD5935       | ACVR2A | cna | gain    | BASIS    |
| PD5945       | ACVR2A | cna | gain    | BASIS    |
| PD5948       | ACVR2A | cna | gain    | BASIS    |
| PD6406       | ACVR2A | cna | hetloss | BASIS    |
| PD6413       | ACVR2A | cna | hetloss | BASIS    |
| PD7067       | ACVR2A | cna | gain    | BASIS    |
| PD7215       | ACVR2A | cna | gain    | BASIS    |
| PD8621       | ACVR2A | cna | hetloss | BASIS    |
| PD9702       | ACVR2A | cna | gain    | BASIS    |
| TCGA-AN-A0XU | BCL2L2 | cna | hetloss | TCGA     |
| TCGA-AO-A0JL | BCL2L2 | cna | hetloss | TCGA     |
| TCGA-BH-A0AW | BCL2L2 | cna | hetloss | TCGA     |
| TCGA-BH-A1FU | BCL2L2 | cna | gain    | TCGA     |
| TCGA-D8-A27M | BCL2L2 | cna | hetloss | TCGA     |
| TCGA-LL-A5YP | BCL2L2 | cna | hetloss | TCGA     |
| MB-2827      | BCL2L2 | cna | amp     | METABRIC |
| MB-5070      | BCL2L2 | cna | hetloss | METABRIC |
| MB-6060      | BCL2L2 | cna | gain    | METABRIC |
| PD10014      | BCL2L2 | cna | gain    | BASIS    |
| PD11327      | BCL2L2 | cna | homdel  | BASIS    |

|              |        |     |         |          |
|--------------|--------|-----|---------|----------|
| PD13299      | BCL2L2 | cna | gain    | BASIS    |
| PD22355      | BCL2L2 | cna | hetloss | BASIS    |
| PD23574      | BCL2L2 | cna | gain    | BASIS    |
| PD23578      | BCL2L2 | cna | hetloss | BASIS    |
| PD24186      | BCL2L2 | cna | gain    | BASIS    |
| PD24202      | BCL2L2 | cna | hetloss | BASIS    |
| PD24206      | BCL2L2 | cna | gain    | BASIS    |
| PD3890       | BCL2L2 | cna | hetloss | BASIS    |
| PD3905       | BCL2L2 | cna | gain    | BASIS    |
| PD4005       | BCL2L2 | cna | hetloss | BASIS    |
| PD4826       | BCL2L2 | cna | gain    | BASIS    |
| PD4967       | BCL2L2 | cna | hetloss | BASIS    |
| PD5930       | BCL2L2 | cna | hetloss | BASIS    |
| PD5935       | BCL2L2 | cna | gain    | BASIS    |
| PD5945       | BCL2L2 | cna | amp     | BASIS    |
| PD5948       | BCL2L2 | cna | gain    | BASIS    |
| PD6406       | BCL2L2 | cna | hetloss | BASIS    |
| PD6731       | BCL2L2 | cna | hetloss | BASIS    |
| PD7215       | BCL2L2 | cna | gain    | BASIS    |
| PD8621       | BCL2L2 | cna | gain    | BASIS    |
| PD8980       | BCL2L2 | cna | amp     | BASIS    |
| PD9004       | BCL2L2 | cna | gain    | BASIS    |
| PD9702       | BCL2L2 | cna | gain    | BASIS    |
| TCGA-BH-A0C0 | CBLB   | cna | hetloss | TCGA     |
| TCGA-BH-A18R | CBLB   | cna | gain    | TCGA     |
| TCGA-BH-A1FU | CBLB   | cna | hetloss | TCGA     |
| TCGA-C8-A12L | CBLB   | cna | hetloss | TCGA     |
| TCGA-E2-A1L7 | CBLB   | cna | hetloss | TCGA     |
| TCGA-LL-A5YP | CBLB   | cna | gain    | TCGA     |
| MB-0346      | CBLB   | cna | hetloss | METABRIC |
| MB-5107      | CBLB   | cna | gain    | METABRIC |
| MB-6060      | CBLB   | cna | gain    | METABRIC |
| MTS-T0064    | CBLB   | cna | gain    | METABRIC |
| PD11327      | CBLB   | cna | gain    | BASIS    |
| PD13296      | CBLB   | cna | hetloss | BASIS    |
| PD13299      | CBLB   | cna | gain    | BASIS    |
| PD23561      | CBLB   | cna | hetloss | BASIS    |
| PD23574      | CBLB   | cna | gain    | BASIS    |
| PD24186      | CBLB   | cna | gain    | BASIS    |
| PD24202      | CBLB   | cna | gain    | BASIS    |
| PD24206      | CBLB   | cna | gain    | BASIS    |
| PD24337      | CBLB   | cna | gain    | BASIS    |
| PD3905       | CBLB   | cna | amp     | BASIS    |
| PD4005       | CBLB   | cna | hetloss | BASIS    |
| PD4006       | CBLB   | cna | hetloss | BASIS    |
| PD4107       | CBLB   | cna | gain    | BASIS    |
| PD4826       | CBLB   | cna | gain    | BASIS    |



|              |       |     |         |          |
|--------------|-------|-----|---------|----------|
| PD5930       | CBLB  | cna | hetloss | BASIS    |
| PD5935       | CBLB  | cna | gain    | BASIS    |
| PD5945       | CBLB  | cna | amp     | BASIS    |
| PD5948       | CBLB  | cna | gain    | BASIS    |
| PD7067       | CBLB  | cna | gain    | BASIS    |
| PD7215       | CBLB  | cna | gain    | BASIS    |
| PD8621       | CBLB  | cna | gain    | BASIS    |
| PD8980       | CBLB  | cna | gain    | BASIS    |
| PD9004       | CBLB  | cna | gain    | BASIS    |
| PD9702       | CBLB  | cna | gain    | BASIS    |
| TCGA-AN-A0XU | CD276 | cna | amp     | TCGA     |
| TCGA-AO-A0JL | CD276 | cna | hetloss | TCGA     |
| TCGA-BH-A0AW | CD276 | cna | hetloss | TCGA     |
| TCGA-BH-A0C0 | CD276 | cna | hetloss | TCGA     |
| TCGA-D8-A27M | CD276 | cna | hetloss | TCGA     |
| TCGA-E2-A1L7 | CD276 | cna | gain    | TCGA     |
| TCGA-LL-A5YP | CD276 | cna | hetloss | TCGA     |
| MB-0346      | CD276 | cna | hetloss | METABRIC |
| MB-5070      | CD276 | cna | hetloss | METABRIC |
| MB-6060      | CD276 | cna | hetloss | METABRIC |
| MB-7038      | CD276 | cna | gain    | METABRIC |
| PD11327      | CD276 | cna | gain    | BASIS    |
| PD11742      | CD276 | cna | hetloss | BASIS    |
| PD13296      | CD276 | cna | homdel  | BASIS    |
| PD13297      | CD276 | cna | hetloss | BASIS    |
| PD13299      | CD276 | cna | gain    | BASIS    |
| PD22355      | CD276 | cna | hetloss | BASIS    |
| PD23562      | CD276 | cna | gain    | BASIS    |
| PD23574      | CD276 | cna | gain    | BASIS    |
| PD23578      | CD276 | cna | gain    | BASIS    |
| PD24202      | CD276 | cna | hetloss | BASIS    |
| PD24206      | CD276 | cna | gain    | BASIS    |
| PD3890       | CD276 | cna | hetloss | BASIS    |
| PD3905       | CD276 | cna | gain    | BASIS    |
| PD4006       | CD276 | cna | gain    | BASIS    |
| PD5945       | CD276 | cna | gain    | BASIS    |
| PD5948       | CD276 | cna | gain    | BASIS    |
| PD6406       | CD276 | cna | hetloss | BASIS    |
| PD7067       | CD276 | cna | gain    | BASIS    |
| PD7215       | CD276 | cna | gain    | BASIS    |
| PD8621       | CD276 | cna | gain    | BASIS    |
| PD8980       | CD276 | cna | gain    | BASIS    |
| PD9585       | CD276 | cna | hetloss | BASIS    |
| PD9702       | CD276 | cna | gain    | BASIS    |
| TCGA-AN-A0XU | CD70  | cna | hetloss | TCGA     |
| TCGA-AO-A0JL | CD70  | cna | gain    | TCGA     |
| TCGA-BH-A0C0 | CD70  | cna | gain    | TCGA     |

|              |       |     |         |          |
|--------------|-------|-----|---------|----------|
| TCGA-BH-A1FU | CD70  | cna | hetloss | TCGA     |
| TCGA-C8-A12L | CD70  | cna | hetloss | TCGA     |
| TCGA-D8-A27M | CD70  | cna | hetloss | TCGA     |
| TCGA-EW-A10X | CD70  | cna | hetloss | TCGA     |
| TCGA-LL-A5YP | CD70  | cna | hetloss | TCGA     |
| MB-0346      | CD70  | cna | gain    | METABRIC |
| MB-2827      | CD70  | cna | hetloss | METABRIC |
| MB-5070      | CD70  | cna | hetloss | METABRIC |
| MB-5465      | CD70  | cna | gain    | METABRIC |
| MB-6098      | CD70  | cna | hetloss | METABRIC |
| MB-7038      | CD70  | cna | hetloss | METABRIC |
| MB-0420      | CD70  | cna | hetloss | METABRIC |
| PD10014      | CD70  | cna | hetloss | BASIS    |
| PD11327      | CD70  | cna | homdel  | BASIS    |
| PD14442      | CD70  | cna | hetloss | BASIS    |
| PD23574      | CD70  | cna | gain    | BASIS    |
| PD24202      | CD70  | cna | gain    | BASIS    |
| PD24206      | CD70  | cna | hetloss | BASIS    |
| PD3905       | CD70  | cna | gain    | BASIS    |
| PD4006       | CD70  | cna | gain    | BASIS    |
| PD4107       | CD70  | cna | gain    | BASIS    |
| PD4826       | CD70  | cna | gain    | BASIS    |
| PD4967       | CD70  | cna | homdel  | BASIS    |
| PD5930       | CD70  | cna | gain    | BASIS    |
| PD5945       | CD70  | cna | gain    | BASIS    |
| PD5948       | CD70  | cna | gain    | BASIS    |
| PD7067       | CD70  | cna | gain    | BASIS    |
| PD7215       | CD70  | cna | amp     | BASIS    |
| PD8621       | CD70  | cna | gain    | BASIS    |
| PD8980       | CD70  | cna | gain    | BASIS    |
| PD9702       | CD70  | cna | gain    | BASIS    |
| TCGA-AO-A0JL | CRTC1 | cna | gain    | TCGA     |
| TCGA-BH-A0AW | CRTC1 | cna | gain    | TCGA     |
| TCGA-BH-A0C0 | CRTC1 | cna | gain    | TCGA     |
| TCGA-BH-A1FU | CRTC1 | cna | hetloss | TCGA     |
| TCGA-C8-A12L | CRTC1 | cna | gain    | TCGA     |
| TCGA-D8-A27M | CRTC1 | cna | hetloss | TCGA     |
| TCGA-EW-A10X | CRTC1 | cna | hetloss | TCGA     |
| TCGA-LL-A5YP | CRTC1 | cna | hetloss | TCGA     |
| MB-0346      | CRTC1 | cna | hetloss | METABRIC |
| MB-2827      | CRTC1 | cna | hetloss | METABRIC |
| MB-6060      | CRTC1 | cna | gain    | METABRIC |
| MB-6098      | CRTC1 | cna | hetloss | METABRIC |
| MB-0420      | CRTC1 | cna | hetloss | METABRIC |
| MTS-T0064    | CRTC1 | cna | amp     | METABRIC |
| PD13299      | CRTC1 | cna | gain    | BASIS    |
| PD14442      | CRTC1 | cna | hetloss | BASIS    |

|                   |        |     |         |            |
|-------------------|--------|-----|---------|------------|
| PD22355           | CRTC1  | cna | gain    | BASIS      |
| PD23562           | CRTC1  | cna | gain    | BASIS      |
| PD23574           | CRTC1  | cna | gain    | BASIS      |
| PD24186           | CRTC1  | cna | amp     | BASIS      |
| PD24206           | CRTC1  | cna | hetloss | BASIS      |
| PD3890            | CRTC1  | cna | hetloss | BASIS      |
| PD3905            | CRTC1  | cna | gain    | BASIS      |
| PD4006            | CRTC1  | cna | amp     | BASIS      |
| PD4107            | CRTC1  | cna | gain    | BASIS      |
| PD4826            | CRTC1  | cna | gain    | BASIS      |
| PD4967            | CRTC1  | cna | hetloss | BASIS      |
| PD5930            | CRTC1  | cna | gain    | BASIS      |
| PD5935            | CRTC1  | cna | gain    | BASIS      |
| PD5945            | CRTC1  | cna | amp     | BASIS      |
| PD5948            | CRTC1  | cna | gain    | BASIS      |
| PD7067            | CRTC1  | cna | gain    | BASIS      |
| PD7215            | CRTC1  | cna | amp     | BASIS      |
| PD9702            | CRTC1  | cna | gain    | BASIS      |
| TCGA-AN-A0XU      | CTNNB1 | cna | hetloss | TCGA       |
| TCGA-BH-A0C0      | CTNNB1 | cna | hetloss | TCGA       |
| TCGA-BH-A1FU      | CTNNB1 | cna | hetloss | TCGA       |
| TCGA-C8-A12L      | CTNNB1 | cna | hetloss | TCGA       |
| TCGA-D8-A27M      | CTNNB1 | cna | hetloss | TCGA       |
| TCGA-E9-A1NC      | CTNNB1 | cna | hetloss | TCGA       |
| TCGA-LL-A5YP      | CTNNB1 | cna | gain    | TCGA       |
| MB-2827           | CTNNB1 | cna | hetloss | METABRIC   |
| MB-7038           | CTNNB1 | cna | hetloss | METABRIC   |
| MB-7048           | CTNNB1 | cna | hetloss | METABRIC   |
| MB-0420           | CTNNB1 | cna | hetloss | METABRIC   |
| P-0009557-T01-IM5 | CTNNB1 | cna | homdel  | MSK-IMPACT |
| PD10014           | CTNNB1 | cna | hetloss | BASIS      |
| PD13296           | CTNNB1 | cna | hetloss | BASIS      |
| PD13297           | CTNNB1 | cna | hetloss | BASIS      |
| PD13299           | CTNNB1 | cna | gain    | BASIS      |
| PD13771           | CTNNB1 | cna | gain    | BASIS      |
| PD22355           | CTNNB1 | cna | hetloss | BASIS      |
| PD23561           | CTNNB1 | cna | hetloss | BASIS      |
| PD23574           | CTNNB1 | cna | gain    | BASIS      |
| PD23578           | CTNNB1 | cna | hetloss | BASIS      |
| PD24202           | CTNNB1 | cna | hetloss | BASIS      |
| PD24206           | CTNNB1 | cna | gain    | BASIS      |
| PD24337           | CTNNB1 | cna | hetloss | BASIS      |
| PD3890            | CTNNB1 | cna | hetloss | BASIS      |
| PD3905            | CTNNB1 | cna | gain    | BASIS      |
| PD4005            | CTNNB1 | cna | gain    | BASIS      |
| PD4826            | CTNNB1 | cna | gain    | BASIS      |
| PD5945            | CTNNB1 | cna | gain    | BASIS      |

|              |        |     |         |          |
|--------------|--------|-----|---------|----------|
| PD6406       | CTNNB1 | cna | hetloss | BASIS    |
| PD6731       | CTNNB1 | cna | hetloss | BASIS    |
| PD7067       | CTNNB1 | cna | gain    | BASIS    |
| PD8980       | CTNNB1 | cna | gain    | BASIS    |
| PD9585       | CTNNB1 | cna | hetloss | BASIS    |
| TCGA-AN-A0XU | DOCK2  | cna | hetloss | TCGA     |
| TCGA-AO-A0JL | DOCK2  | cna | gain    | TCGA     |
| TCGA-BH-A0C0 | DOCK2  | cna | gain    | TCGA     |
| TCGA-BH-A1FU | DOCK2  | cna | hetloss | TCGA     |
| TCGA-C8-A12L | DOCK2  | cna | hetloss | TCGA     |
| TCGA-D8-A27M | DOCK2  | cna | hetloss | TCGA     |
| TCGA-E2-A1L7 | DOCK2  | cna | hetloss | TCGA     |
| TCGA-LL-A5YP | DOCK2  | cna | hetloss | TCGA     |
| MB-0346      | DOCK2  | cna | gain    | METABRIC |
| MB-5070      | DOCK2  | cna | hetloss | METABRIC |
| MB-5465      | DOCK2  | cna | hetloss | METABRIC |
| MB-6098      | DOCK2  | cna | hetloss | METABRIC |
| MB-0420      | DOCK2  | cna | hetloss | METABRIC |
| PD10014      | DOCK2  | cna | hetloss | BASIS    |
| PD11327      | DOCK2  | cna | gain    | BASIS    |
| PD13296      | DOCK2  | cna | hetloss | BASIS    |
| PD13297      | DOCK2  | cna | hetloss | BASIS    |
| PD13771      | DOCK2  | cna | gain    | BASIS    |
| PD22355      | DOCK2  | cna | hetloss | BASIS    |
| PD23578      | DOCK2  | cna | hetloss | BASIS    |
| PD24186      | DOCK2  | cna | gain    | BASIS    |
| PD24202      | DOCK2  | cna | hetloss | BASIS    |
| PD24206      | DOCK2  | cna | gain    | BASIS    |
| PD24337      | DOCK2  | cna | hetloss | BASIS    |
| PD3890       | DOCK2  | cna | hetloss | BASIS    |
| PD3905       | DOCK2  | cna | gain    | BASIS    |
| PD4005       | DOCK2  | cna | hetloss | BASIS    |
| PD4006       | DOCK2  | cna | hetloss | BASIS    |
| PD4107       | DOCK2  | cna | hetloss | BASIS    |
| PD4826       | DOCK2  | cna | gain    | BASIS    |
| PD5945       | DOCK2  | cna | gain    | BASIS    |
| PD6406       | DOCK2  | cna | hetloss | BASIS    |
| PD6413       | DOCK2  | cna | hetloss | BASIS    |
| PD8980       | DOCK2  | cna | gain    | BASIS    |
| TCGA-AO-A0JL | ELL    | cna | gain    | TCGA     |
| TCGA-BH-A0AW | ELL    | cna | gain    | TCGA     |
| TCGA-BH-A0C0 | ELL    | cna | gain    | TCGA     |
| TCGA-BH-A1FU | ELL    | cna | hetloss | TCGA     |
| TCGA-C8-A12L | ELL    | cna | gain    | TCGA     |
| TCGA-D8-A27M | ELL    | cna | hetloss | TCGA     |
| TCGA-EW-A10X | ELL    | cna | hetloss | TCGA     |
| TCGA-LL-A5YP | ELL    | cna | hetloss | TCGA     |

|              |       |     |         |          |
|--------------|-------|-----|---------|----------|
| MB-0346      | ELL   | cna | hetloss | METABRIC |
| MB-2827      | ELL   | cna | hetloss | METABRIC |
| MB-6060      | ELL   | cna | gain    | METABRIC |
| MB-6098      | ELL   | cna | hetloss | METABRIC |
| MB-0420      | ELL   | cna | hetloss | METABRIC |
| MTS-T0064    | ELL   | cna | amp     | METABRIC |
| PD13299      | ELL   | cna | gain    | BASIS    |
| PD14442      | ELL   | cna | hetloss | BASIS    |
| PD22355      | ELL   | cna | gain    | BASIS    |
| PD23562      | ELL   | cna | gain    | BASIS    |
| PD23574      | ELL   | cna | gain    | BASIS    |
| PD24186      | ELL   | cna | gain    | BASIS    |
| PD24206      | ELL   | cna | hetloss | BASIS    |
| PD3890       | ELL   | cna | hetloss | BASIS    |
| PD3905       | ELL   | cna | gain    | BASIS    |
| PD4006       | ELL   | cna | amp     | BASIS    |
| PD4107       | ELL   | cna | gain    | BASIS    |
| PD4826       | ELL   | cna | gain    | BASIS    |
| PD4967       | ELL   | cna | hetloss | BASIS    |
| PD5930       | ELL   | cna | gain    | BASIS    |
| PD5935       | ELL   | cna | gain    | BASIS    |
| PD5945       | ELL   | cna | amp     | BASIS    |
| PD5948       | ELL   | cna | gain    | BASIS    |
| PD7067       | ELL   | cna | gain    | BASIS    |
| PD7215       | ELL   | cna | amp     | BASIS    |
| PD9702       | ELL   | cna | gain    | BASIS    |
| TCGA-AN-A0XU | EPHA3 | cna | hetloss | TCGA     |
| TCGA-AO-A0JL | EPHA3 | cna | gain    | TCGA     |
| TCGA-BH-A0C0 | EPHA3 | cna | gain    | TCGA     |
| TCGA-BH-A1FU | EPHA3 | cna | hetloss | TCGA     |
| TCGA-C8-A12L | EPHA3 | cna | gain    | TCGA     |
| TCGA-D8-A27M | EPHA3 | cna | hetloss | TCGA     |
| TCGA-E2-A1L7 | EPHA3 | cna | hetloss | TCGA     |
| TCGA-E9-A1NC | EPHA3 | cna | hetloss | TCGA     |
| TCGA-LL-A5YP | EPHA3 | cna | gain    | TCGA     |
| MB-0346      | EPHA3 | cna | hetloss | METABRIC |
| MB-2827      | EPHA3 | cna | hetloss | METABRIC |
| PD10014      | EPHA3 | cna | gain    | BASIS    |
| PD13296      | EPHA3 | cna | gain    | BASIS    |
| PD13299      | EPHA3 | cna | gain    | BASIS    |
| PD13771      | EPHA3 | cna | hetloss | BASIS    |
| PD23561      | EPHA3 | cna | hetloss | BASIS    |
| PD23574      | EPHA3 | cna | gain    | BASIS    |
| PD24202      | EPHA3 | cna | hetloss | BASIS    |
| PD24206      | EPHA3 | cna | gain    | BASIS    |
| PD24337      | EPHA3 | cna | hetloss | BASIS    |
| PD3905       | EPHA3 | cna | amp     | BASIS    |

|              |       |     |         |          |
|--------------|-------|-----|---------|----------|
| PD4006       | EPHA3 | cna | hetloss | BASIS    |
| PD4107       | EPHA3 | cna | gain    | BASIS    |
| PD4826       | EPHA3 | cna | gain    | BASIS    |
| PD5930       | EPHA3 | cna | hetloss | BASIS    |
| PD5945       | EPHA3 | cna | amp     | BASIS    |
| PD5948       | EPHA3 | cna | gain    | BASIS    |
| PD6731       | EPHA3 | cna | hetloss | BASIS    |
| PD7067       | EPHA3 | cna | gain    | BASIS    |
| PD7215       | EPHA3 | cna | gain    | BASIS    |
| PD8621       | EPHA3 | cna | hetloss | BASIS    |
| PD8980       | EPHA3 | cna | hetloss | BASIS    |
| PD9004       | EPHA3 | cna | gain    | BASIS    |
| PD9585       | EPHA3 | cna | hetloss | BASIS    |
| TCGA-A2-A25B | EPHA5 | cna | hetloss | TCGA     |
| TCGA-AO-A0JL | EPHA5 | cna | gain    | TCGA     |
| TCGA-BH-A0C0 | EPHA5 | cna | gain    | TCGA     |
| TCGA-BH-A1FU | EPHA5 | cna | gain    | TCGA     |
| TCGA-D8-A27M | EPHA5 | cna | gain    | TCGA     |
| TCGA-E2-A1L7 | EPHA5 | cna | hetloss | TCGA     |
| TCGA-E9-A1NC | EPHA5 | cna | hetloss | TCGA     |
| TCGA-LL-A5YP | EPHA5 | cna | gain    | TCGA     |
| MB-6060      | EPHA5 | cna | hetloss | METABRIC |
| MB-6098      | EPHA5 | cna | amp     | METABRIC |
| MB-7038      | EPHA5 | cna | gain    | METABRIC |
| MB-0420      | EPHA5 | cna | hetloss | METABRIC |
| PD11327      | EPHA5 | cna | amp     | BASIS    |
| PD11742      | EPHA5 | cna | hetloss | BASIS    |
| PD13296      | EPHA5 | cna | hetloss | BASIS    |
| PD13297      | EPHA5 | cna | hetloss | BASIS    |
| PD22355      | EPHA5 | cna | hetloss | BASIS    |
| PD23562      | EPHA5 | cna | gain    | BASIS    |
| PD23574      | EPHA5 | cna | gain    | BASIS    |
| PD24202      | EPHA5 | cna | hetloss | BASIS    |
| PD24206      | EPHA5 | cna | gain    | BASIS    |
| PD3890       | EPHA5 | cna | gain    | BASIS    |
| PD3905       | EPHA5 | cna | gain    | BASIS    |
| PD4006       | EPHA5 | cna | hetloss | BASIS    |
| PD4107       | EPHA5 | cna | gain    | BASIS    |
| PD4826       | EPHA5 | cna | gain    | BASIS    |
| PD5945       | EPHA5 | cna | gain    | BASIS    |
| PD5948       | EPHA5 | cna | gain    | BASIS    |
| PD6731       | EPHA5 | cna | hetloss | BASIS    |
| PD7067       | EPHA5 | cna | gain    | BASIS    |
| PD7215       | EPHA5 | cna | gain    | BASIS    |
| PD8621       | EPHA5 | cna | hetloss | BASIS    |
| PD8980       | EPHA5 | cna | hetloss | BASIS    |
| PD9702       | EPHA5 | cna | gain    | BASIS    |

|              |       |     |         |          |
|--------------|-------|-----|---------|----------|
| TCGA-A2-A25B | EPS15 | cna | gain    | TCGA     |
| TCGA-AN-A0XU | EPS15 | cna | gain    | TCGA     |
| TCGA-AO-A0JL | EPS15 | cna | hetloss | TCGA     |
| TCGA-BH-A0AW | EPS15 | cna | gain    | TCGA     |
| TCGA-BH-A0C0 | EPS15 | cna | gain    | TCGA     |
| TCGA-BH-A1FU | EPS15 | cna | gain    | TCGA     |
| TCGA-D8-A27M | EPS15 | cna | gain    | TCGA     |
| TCGA-E2-A1L7 | EPS15 | cna | gain    | TCGA     |
| TCGA-LL-A5YP | EPS15 | cna | hetloss | TCGA     |
| MB-0346      | EPS15 | cna | hetloss | METABRIC |
| MB-5465      | EPS15 | cna | gain    | METABRIC |
| MB-6060      | EPS15 | cna | hetloss | METABRIC |
| MB-7038      | EPS15 | cna | gain    | METABRIC |
| MB-0420      | EPS15 | cna | hetloss | METABRIC |
| PD11327      | EPS15 | cna | hetloss | BASIS    |
| PD11742      | EPS15 | cna | hetloss | BASIS    |
| PD13299      | EPS15 | cna | gain    | BASIS    |
| PD24186      | EPS15 | cna | amp     | BASIS    |
| PD24206      | EPS15 | cna | gain    | BASIS    |
| PD3905       | EPS15 | cna | gain    | BASIS    |
| PD4005       | EPS15 | cna | hetloss | BASIS    |
| PD4006       | EPS15 | cna | gain    | BASIS    |
| PD4107       | EPS15 | cna | gain    | BASIS    |
| PD4826       | EPS15 | cna | gain    | BASIS    |
| PD5930       | EPS15 | cna | gain    | BASIS    |
| PD5935       | EPS15 | cna | gain    | BASIS    |
| PD5945       | EPS15 | cna | amp     | BASIS    |
| PD5948       | EPS15 | cna | gain    | BASIS    |
| PD6413       | EPS15 | cna | hetloss | BASIS    |
| PD7067       | EPS15 | cna | gain    | BASIS    |
| PD7215       | EPS15 | cna | gain    | BASIS    |
| PD8621       | EPS15 | cna | gain    | BASIS    |
| PD9004       | EPS15 | cna | gain    | BASIS    |
| PD9702       | EPS15 | cna | gain    | BASIS    |
| TCGA-A2-A25B | ERBB3 | cna | gain    | TCGA     |
| TCGA-AO-A0JL | ERBB3 | cna | hetloss | TCGA     |
| TCGA-BH-A18R | ERBB3 | cna | gain    | TCGA     |
| TCGA-BH-A1FU | ERBB3 | cna | hetloss | TCGA     |
| TCGA-C8-A12L | ERBB3 | cna | gain    | TCGA     |
| TCGA-D8-A27M | ERBB3 | cna | hetloss | TCGA     |
| TCGA-E2-A1L7 | ERBB3 | cna | hetloss | TCGA     |
| TCGA-E9-A1NC | ERBB3 | cna | hetloss | TCGA     |
| TCGA-LL-A5YP | ERBB3 | cna | hetloss | TCGA     |
| MB-0346      | ERBB3 | cna | gain    | METABRIC |
| MB-2827      | ERBB3 | cna | hetloss | METABRIC |
| MB-6098      | ERBB3 | cna | hetloss | METABRIC |
| MB-7038      | ERBB3 | cna | hetloss | METABRIC |

|              |       |     |         |          |
|--------------|-------|-----|---------|----------|
| MB-0420      | ERBB3 | cna | hetloss | METABRIC |
| PD11327      | ERBB3 | cna | homdel  | BASIS    |
| PD13296      | ERBB3 | cna | hetloss | BASIS    |
| PD13297      | ERBB3 | cna | hetloss | BASIS    |
| PD13771      | ERBB3 | cna | gain    | BASIS    |
| PD24186      | ERBB3 | cna | gain    | BASIS    |
| PD24202      | ERBB3 | cna | hetloss | BASIS    |
| PD24206      | ERBB3 | cna | gain    | BASIS    |
| PD24337      | ERBB3 | cna | hetloss | BASIS    |
| PD3890       | ERBB3 | cna | hetloss | BASIS    |
| PD3905       | ERBB3 | cna | gain    | BASIS    |
| PD4826       | ERBB3 | cna | gain    | BASIS    |
| PD5945       | ERBB3 | cna | gain    | BASIS    |
| PD5948       | ERBB3 | cna | gain    | BASIS    |
| PD6406       | ERBB3 | cna | hetloss | BASIS    |
| PD6413       | ERBB3 | cna | hetloss | BASIS    |
| PD6731       | ERBB3 | cna | hetloss | BASIS    |
| PD7067       | ERBB3 | cna | gain    | BASIS    |
| PD8621       | ERBB3 | cna | hetloss | BASIS    |
| PD9585       | ERBB3 | cna | hetloss | BASIS    |
| PD9702       | ERBB3 | cna | gain    | BASIS    |
| TCGA-A2-A25B | FANCC | cna | gain    | TCGA     |
| TCGA-AN-A0XU | FANCC | cna | hetloss | TCGA     |
| TCGA-AO-A0JL | FANCC | cna | hetloss | TCGA     |
| TCGA-BH-A1FU | FANCC | cna | hetloss | TCGA     |
| TCGA-C8-A12L | FANCC | cna | hetloss | TCGA     |
| TCGA-E9-A1NC | FANCC | cna | hetloss | TCGA     |
| TCGA-LL-A5YP | FANCC | cna | hetloss | TCGA     |
| MB-0346      | FANCC | cna | hetloss | METABRIC |
| MB-2827      | FANCC | cna | amp     | METABRIC |
| MB-5070      | FANCC | cna | hetloss | METABRIC |
| MB-5107      | FANCC | cna | hetloss | METABRIC |
| MB-6098      | FANCC | cna | hetloss | METABRIC |
| MB-7038      | FANCC | cna | hetloss | METABRIC |
| PD11327      | FANCC | cna | gain    | BASIS    |
| PD13296      | FANCC | cna | gain    | BASIS    |
| PD13771      | FANCC | cna | hetloss | BASIS    |
| PD23562      | FANCC | cna | gain    | BASIS    |
| PD23578      | FANCC | cna | hetloss | BASIS    |
| PD24186      | FANCC | cna | amp     | BASIS    |
| PD24202      | FANCC | cna | hetloss | BASIS    |
| PD24206      | FANCC | cna | gain    | BASIS    |
| PD3905       | FANCC | cna | gain    | BASIS    |
| PD4005       | FANCC | cna | gain    | BASIS    |
| PD4006       | FANCC | cna | gain    | BASIS    |
| PD4107       | FANCC | cna | gain    | BASIS    |
| PD5945       | FANCC | cna | amp     | BASIS    |



|              |       |     |         |          |
|--------------|-------|-----|---------|----------|
| PD5948       | FANCC | cna | gain    | BASIS    |
| PD6406       | FANCC | cna | hetloss | BASIS    |
| PD6731       | FANCC | cna | hetloss | BASIS    |
| PD7067       | FANCC | cna | gain    | BASIS    |
| PD7215       | FANCC | cna | gain    | BASIS    |
| PD8621       | FANCC | cna | gain    | BASIS    |
| PD9004       | FANCC | cna | gain    | BASIS    |
| PD9585       | FANCC | cna | hetloss | BASIS    |
| TCGA-A2-A25B | FANCL | cna | hetloss | TCGA     |
| TCGA-AN-A0XU | FANCL | cna | gain    | TCGA     |
| TCGA-AO-A0JL | FANCL | cna | gain    | TCGA     |
| TCGA-BH-A0AW | FANCL | cna | gain    | TCGA     |
| TCGA-BH-A0C0 | FANCL | cna | gain    | TCGA     |
| TCGA-D8-A27M | FANCL | cna | gain    | TCGA     |
| TCGA-LL-A5YP | FANCL | cna | gain    | TCGA     |
| MB-5465      | FANCL | cna | amp     | METABRIC |
| MB-6271      | FANCL | cna | hetloss | METABRIC |
| MB-7038      | FANCL | cna | amp     | METABRIC |
| PD10014      | FANCL | cna | gain    | BASIS    |
| PD11327      | FANCL | cna | gain    | BASIS    |
| PD13296      | FANCL | cna | gain    | BASIS    |
| PD13297      | FANCL | cna | gain    | BASIS    |
| PD13299      | FANCL | cna | gain    | BASIS    |
| PD22355      | FANCL | cna | gain    | BASIS    |
| PD23562      | FANCL | cna | gain    | BASIS    |
| PD23578      | FANCL | cna | gain    | BASIS    |
| PD24186      | FANCL | cna | gain    | BASIS    |
| PD24202      | FANCL | cna | gain    | BASIS    |
| PD24206      | FANCL | cna | gain    | BASIS    |
| PD3890       | FANCL | cna | hetloss | BASIS    |
| PD3905       | FANCL | cna | gain    | BASIS    |
| PD4006       | FANCL | cna | gain    | BASIS    |
| PD5930       | FANCL | cna | gain    | BASIS    |
| PD5935       | FANCL | cna | gain    | BASIS    |
| PD5945       | FANCL | cna | amp     | BASIS    |
| PD5948       | FANCL | cna | gain    | BASIS    |
| PD7067       | FANCL | cna | gain    | BASIS    |
| PD7215       | FANCL | cna | gain    | BASIS    |
| PD8621       | FANCL | cna | gain    | BASIS    |
| PD8980       | FANCL | cna | hetloss | BASIS    |
| PD9004       | FANCL | cna | gain    | BASIS    |
| PD9702       | FANCL | cna | gain    | BASIS    |
| TCGA-A2-A25B | GNAQ  | cna | gain    | TCGA     |
| TCGA-AN-A0XU | GNAQ  | cna | hetloss | TCGA     |
| TCGA-AO-A0JL | GNAQ  | cna | hetloss | TCGA     |
| TCGA-BH-A0C0 | GNAQ  | cna | gain    | TCGA     |
| TCGA-BH-A1FU | GNAQ  | cna | hetloss | TCGA     |

|              |        |     |         |          |
|--------------|--------|-----|---------|----------|
| TCGA-C8-A12L | GNAQ   | cna | hetloss | TCGA     |
| TCGA-E9-A1NC | GNAQ   | cna | hetloss | TCGA     |
| TCGA-LL-A5YP | GNAQ   | cna | hetloss | TCGA     |
| MB-0346      | GNAQ   | cna | hetloss | METABRIC |
| MB-5107      | GNAQ   | cna | hetloss | METABRIC |
| MB-5465      | GNAQ   | cna | gain    | METABRIC |
| MB-6098      | GNAQ   | cna | hetloss | METABRIC |
| MB-7038      | GNAQ   | cna | hetloss | METABRIC |
| MB-0420      | GNAQ   | cna | hetloss | METABRIC |
| MTS-T0064    | GNAQ   | cna | gain    | METABRIC |
| PD11327      | GNAQ   | cna | gain    | BASIS    |
| PD13296      | GNAQ   | cna | hetloss | BASIS    |
| PD23562      | GNAQ   | cna | gain    | BASIS    |
| PD23578      | GNAQ   | cna | hetloss | BASIS    |
| PD24186      | GNAQ   | cna | amp     | BASIS    |
| PD24202      | GNAQ   | cna | hetloss | BASIS    |
| PD24206      | GNAQ   | cna | gain    | BASIS    |
| PD3890       | GNAQ   | cna | gain    | BASIS    |
| PD3905       | GNAQ   | cna | gain    | BASIS    |
| PD4006       | GNAQ   | cna | gain    | BASIS    |
| PD4107       | GNAQ   | cna | gain    | BASIS    |
| PD5945       | GNAQ   | cna | amp     | BASIS    |
| PD5948       | GNAQ   | cna | hetloss | BASIS    |
| PD6731       | GNAQ   | cna | hetloss | BASIS    |
| PD7067       | GNAQ   | cna | gain    | BASIS    |
| PD7215       | GNAQ   | cna | gain    | BASIS    |
| PD8621       | GNAQ   | cna | gain    | BASIS    |
| PD9004       | GNAQ   | cna | gain    | BASIS    |
| PD9585       | GNAQ   | cna | hetloss | BASIS    |
| TCGA-AN-A0XU | GRIN2A | cna | gain    | TCGA     |
| TCGA-AO-A0JL | GRIN2A | cna | gain    | TCGA     |
| TCGA-BH-A0AW | GRIN2A | cna | gain    | TCGA     |
| TCGA-BH-A0C0 | GRIN2A | cna | gain    | TCGA     |
| TCGA-C8-A12L | GRIN2A | cna | gain    | TCGA     |
| TCGA-E2-A1L7 | GRIN2A | cna | hetloss | TCGA     |
| TCGA-LL-A5YP | GRIN2A | cna | gain    | TCGA     |
| MB-0346      | GRIN2A | cna | gain    | METABRIC |
| MB-6060      | GRIN2A | cna | gain    | METABRIC |
| MB-6098      | GRIN2A | cna | hetloss | METABRIC |
| MB-6271      | GRIN2A | cna | gain    | METABRIC |
| MB-7032      | GRIN2A | cna | gain    | METABRIC |
| MB-7038      | GRIN2A | cna | hetloss | METABRIC |
| MB-0420      | GRIN2A | cna | hetloss | METABRIC |
| PD10014      | GRIN2A | cna | hetloss | BASIS    |
| PD11742      | GRIN2A | cna | gain    | BASIS    |
| PD13296      | GRIN2A | cna | gain    | BASIS    |
| PD13297      | GRIN2A | cna | hetloss | BASIS    |

|              |        |     |         |          |
|--------------|--------|-----|---------|----------|
| PD13299      | GRIN2A | cna | gain    | BASIS    |
| PD22355      | GRIN2A | cna | hetloss | BASIS    |
| PD23578      | GRIN2A | cna | hetloss | BASIS    |
| PD24186      | GRIN2A | cna | gain    | BASIS    |
| PD24206      | GRIN2A | cna | gain    | BASIS    |
| PD24337      | GRIN2A | cna | hetloss | BASIS    |
| PD3905       | GRIN2A | cna | gain    | BASIS    |
| PD4005       | GRIN2A | cna | gain    | BASIS    |
| PD4006       | GRIN2A | cna | hetloss | BASIS    |
| PD4107       | GRIN2A | cna | gain    | BASIS    |
| PD4826       | GRIN2A | cna | gain    | BASIS    |
| PD5935       | GRIN2A | cna | gain    | BASIS    |
| PD5945       | GRIN2A | cna | gain    | BASIS    |
| PD7215       | GRIN2A | cna | amp     | BASIS    |
| PD9004       | GRIN2A | cna | gain    | BASIS    |
| PD9585       | GRIN2A | cna | hetloss | BASIS    |
| TCGA-AO-A0JL | HDAC4  | cna | hetloss | TCGA     |
| TCGA-BH-A0AW | HDAC4  | cna | hetloss | TCGA     |
| TCGA-C8-A12L | HDAC4  | cna | hetloss | TCGA     |
| TCGA-D8-A27M | HDAC4  | cna | gain    | TCGA     |
| TCGA-E2-A1L7 | HDAC4  | cna | hetloss | TCGA     |
| TCGA-E9-A1NC | HDAC4  | cna | hetloss | TCGA     |
| MB-5107      | HDAC4  | cna | hetloss | METABRIC |
| MB-6060      | HDAC4  | cna | hetloss | METABRIC |
| MB-6098      | HDAC4  | cna | hetloss | METABRIC |
| MB-6271      | HDAC4  | cna | hetloss | METABRIC |
| MB-7048      | HDAC4  | cna | hetloss | METABRIC |
| PD10014      | HDAC4  | cna | gain    | BASIS    |
| PD11327      | HDAC4  | cna | gain    | BASIS    |
| PD11742      | HDAC4  | cna | hetloss | BASIS    |
| PD13297      | HDAC4  | cna | hetloss | BASIS    |
| PD23578      | HDAC4  | cna | hetloss | BASIS    |
| PD24186      | HDAC4  | cna | gain    | BASIS    |
| PD24202      | HDAC4  | cna | hetloss | BASIS    |
| PD24206      | HDAC4  | cna | gain    | BASIS    |
| PD3890       | HDAC4  | cna | hetloss | BASIS    |
| PD3905       | HDAC4  | cna | gain    | BASIS    |
| PD4005       | HDAC4  | cna | hetloss | BASIS    |
| PD4006       | HDAC4  | cna | gain    | BASIS    |
| PD4967       | HDAC4  | cna | hetloss | BASIS    |
| PD5935       | HDAC4  | cna | gain    | BASIS    |
| PD5945       | HDAC4  | cna | gain    | BASIS    |
| PD5948       | HDAC4  | cna | gain    | BASIS    |
| PD6406       | HDAC4  | cna | hetloss | BASIS    |
| PD6413       | HDAC4  | cna | hetloss | BASIS    |
| PD6731       | HDAC4  | cna | hetloss | BASIS    |
| PD7067       | HDAC4  | cna | gain    | BASIS    |

|              |       |     |         |          |
|--------------|-------|-----|---------|----------|
| PD7215       | HDAC4 | cna | gain    | BASIS    |
| PD8980       | HDAC4 | cna | hetloss | BASIS    |
| PD9585       | HDAC4 | cna | hetloss | BASIS    |
| TCGA-A2-A25B | HIF1A | cna | hetloss | TCGA     |
| TCGA-AO-A0JL | HIF1A | cna | hetloss | TCGA     |
| TCGA-BH-A0AW | HIF1A | cna | hetloss | TCGA     |
| TCGA-BH-A1FU | HIF1A | cna | gain    | TCGA     |
| TCGA-C8-A12L | HIF1A | cna | hetloss | TCGA     |
| TCGA-D8-A27M | HIF1A | cna | hetloss | TCGA     |
| TCGA-E2-A1L7 | HIF1A | cna | hetloss | TCGA     |
| TCGA-LL-A5YP | HIF1A | cna | hetloss | TCGA     |
| MB-2827      | HIF1A | cna | hetloss | METABRIC |
| MB-5070      | HIF1A | cna | hetloss | METABRIC |
| MB-6098      | HIF1A | cna | hetloss | METABRIC |
| MB-7038      | HIF1A | cna | hetloss | METABRIC |
| PD10014      | HIF1A | cna | hetloss | BASIS    |
| PD13296      | HIF1A | cna | hetloss | BASIS    |
| PD13297      | HIF1A | cna | hetloss | BASIS    |
| PD22355      | HIF1A | cna | hetloss | BASIS    |
| PD23574      | HIF1A | cna | hetloss | BASIS    |
| PD23578      | HIF1A | cna | hetloss | BASIS    |
| PD24202      | HIF1A | cna | hetloss | BASIS    |
| PD24206      | HIF1A | cna | gain    | BASIS    |
| PD24337      | HIF1A | cna | hetloss | BASIS    |
| PD3890       | HIF1A | cna | hetloss | BASIS    |
| PD3905       | HIF1A | cna | hetloss | BASIS    |
| PD4005       | HIF1A | cna | hetloss | BASIS    |
| PD4006       | HIF1A | cna | hetloss | BASIS    |
| PD4107       | HIF1A | cna | hetloss | BASIS    |
| PD5930       | HIF1A | cna | hetloss | BASIS    |
| PD5945       | HIF1A | cna | gain    | BASIS    |
| PD6406       | HIF1A | cna | hetloss | BASIS    |
| PD7067       | HIF1A | cna | gain    | BASIS    |
| PD7215       | HIF1A | cna | hetloss | BASIS    |
| PD8980       | HIF1A | cna | gain    | BASIS    |
| PD9585       | HIF1A | cna | gain    | BASIS    |
| PD9702       | HIF1A | cna | gain    | BASIS    |
| TCGA-A2-A25B | HOOK3 | cna | hetloss | TCGA     |
| TCGA-AO-A0JL | HOOK3 | cna | amp     | TCGA     |
| TCGA-BH-A0C0 | HOOK3 | cna | gain    | TCGA     |
| TCGA-BH-A1FU | HOOK3 | cna | homdel  | TCGA     |
| TCGA-D8-A27M | HOOK3 | cna | amp     | TCGA     |
| TCGA-LL-A5YP | HOOK3 | cna | amp     | TCGA     |
| MB-0346      | HOOK3 | cna | hetloss | METABRIC |
| MB-2827      | HOOK3 | cna | homdel  | METABRIC |
| MB-6060      | HOOK3 | cna | hetloss | METABRIC |
| MB-7038      | HOOK3 | cna | hetloss | METABRIC |

|              |       |     |         |          |
|--------------|-------|-----|---------|----------|
| PD11327      | HOOK3 | cna | homdel  | BASIS    |
| PD13296      | HOOK3 | cna | hetloss | BASIS    |
| PD13299      | HOOK3 | cna | gain    | BASIS    |
| PD13771      | HOOK3 | cna | amp     | BASIS    |
| PD23562      | HOOK3 | cna | gain    | BASIS    |
| PD23574      | HOOK3 | cna | gain    | BASIS    |
| PD23578      | HOOK3 | cna | hetloss | BASIS    |
| PD24186      | HOOK3 | cna | gain    | BASIS    |
| PD24202      | HOOK3 | cna | hetloss | BASIS    |
| PD24206      | HOOK3 | cna | amp     | BASIS    |
| PD3905       | HOOK3 | cna | gain    | BASIS    |
| PD4006       | HOOK3 | cna | gain    | BASIS    |
| PD4107       | HOOK3 | cna | gain    | BASIS    |
| PD4826       | HOOK3 | cna | hetloss | BASIS    |
| PD5930       | HOOK3 | cna | gain    | BASIS    |
| PD5935       | HOOK3 | cna | gain    | BASIS    |
| PD5945       | HOOK3 | cna | amp     | BASIS    |
| PD5948       | HOOK3 | cna | hetloss | BASIS    |
| PD7067       | HOOK3 | cna | amp     | BASIS    |
| PD7215       | HOOK3 | cna | amp     | BASIS    |
| PD8980       | HOOK3 | cna | amp     | BASIS    |
| PD9004       | HOOK3 | cna | amp     | BASIS    |
| PD9585       | HOOK3 | cna | gain    | BASIS    |
| PD9702       | HOOK3 | cna | gain    | BASIS    |
| TCGA-A2-A25B | IKBKB | cna | hetloss | TCGA     |
| TCGA-AO-A0JL | IKBKB | cna | amp     | TCGA     |
| TCGA-BH-A0C0 | IKBKB | cna | gain    | TCGA     |
| TCGA-BH-A1FU | IKBKB | cna | homdel  | TCGA     |
| TCGA-D8-A27M | IKBKB | cna | amp     | TCGA     |
| TCGA-E2-A1L7 | IKBKB | cna | hetloss | TCGA     |
| TCGA-LL-A5YP | IKBKB | cna | amp     | TCGA     |
| MB-0346      | IKBKB | cna | hetloss | METABRIC |
| MB-2827      | IKBKB | cna | hetloss | METABRIC |
| MB-6060      | IKBKB | cna | amp     | METABRIC |
| MB-7038      | IKBKB | cna | hetloss | METABRIC |
| PD11327      | IKBKB | cna | homdel  | BASIS    |
| PD13296      | IKBKB | cna | hetloss | BASIS    |
| PD13299      | IKBKB | cna | gain    | BASIS    |
| PD13771      | IKBKB | cna | amp     | BASIS    |
| PD23562      | IKBKB | cna | gain    | BASIS    |
| PD23574      | IKBKB | cna | gain    | BASIS    |
| PD23578      | IKBKB | cna | hetloss | BASIS    |
| PD24186      | IKBKB | cna | gain    | BASIS    |
| PD24202      | IKBKB | cna | hetloss | BASIS    |
| PD24206      | IKBKB | cna | amp     | BASIS    |
| PD3905       | IKBKB | cna | gain    | BASIS    |
| PD4006       | IKBKB | cna | gain    | BASIS    |

|              |       |     |         |          |
|--------------|-------|-----|---------|----------|
| PD4107       | IKBKB | cna | gain    | BASIS    |
| PD5930       | IKBKB | cna | gain    | BASIS    |
| PD5935       | IKBKB | cna | gain    | BASIS    |
| PD5945       | IKBKB | cna | amp     | BASIS    |
| PD5948       | IKBKB | cna | hetloss | BASIS    |
| PD7067       | IKBKB | cna | amp     | BASIS    |
| PD7215       | IKBKB | cna | amp     | BASIS    |
| PD8980       | IKBKB | cna | amp     | BASIS    |
| PD9004       | IKBKB | cna | amp     | BASIS    |
| PD9585       | IKBKB | cna | gain    | BASIS    |
| PD9702       | IKBKB | cna | gain    | BASIS    |
| TCGA-A2-A25B | KDM6A | cna | gain    | TCGA     |
| TCGA-AN-A0XU | KDM6A | cna | hetloss | TCGA     |
| TCGA-AO-A0JL | KDM6A | cna | gain    | TCGA     |
| TCGA-BH-A0AW | KDM6A | cna | gain    | TCGA     |
| TCGA-E2-A1L7 | KDM6A | cna | hetloss | TCGA     |
| TCGA-E9-A1NC | KDM6A | cna | hetloss | TCGA     |
| MB-0346      | KDM6A | cna | hetloss | METABRIC |
| MB-2827      | KDM6A | cna | hetloss | METABRIC |
| MB-5070      | KDM6A | cna | hetloss | METABRIC |
| MB-5465      | KDM6A | cna | gain    | METABRIC |
| MB-6098      | KDM6A | cna | hetloss | METABRIC |
| MB-0420      | KDM6A | cna | hetloss | METABRIC |
| PD10014      | KDM6A | cna | hetloss | BASIS    |
| PD11327      | KDM6A | cna | homdel  | BASIS    |
| PD13296      | KDM6A | cna | gain    | BASIS    |
| PD13299      | KDM6A | cna | amp     | BASIS    |
| PD13771      | KDM6A | cna | gain    | BASIS    |
| PD14442      | KDM6A | cna | gain    | BASIS    |
| PD23562      | KDM6A | cna | hetloss | BASIS    |
| PD23574      | KDM6A | cna | gain    | BASIS    |
| PD3905       | KDM6A | cna | gain    | BASIS    |
| PD4005       | KDM6A | cna | hetloss | BASIS    |
| PD4006       | KDM6A | cna | hetloss | BASIS    |
| PD4107       | KDM6A | cna | gain    | BASIS    |
| PD4826       | KDM6A | cna | gain    | BASIS    |
| PD4967       | KDM6A | cna | gain    | BASIS    |
| PD5935       | KDM6A | cna | gain    | BASIS    |
| PD5948       | KDM6A | cna | gain    | BASIS    |
| PD6406       | KDM6A | cna | gain    | BASIS    |
| PD6413       | KDM6A | cna | gain    | BASIS    |
| PD7215       | KDM6A | cna | gain    | BASIS    |
| PD8621       | KDM6A | cna | amp     | BASIS    |
| PD8980       | KDM6A | cna | hetloss | BASIS    |
| PD9004       | KDM6A | cna | gain    | BASIS    |
| TCGA-AO-A0JL | KEAP1 | cna | gain    | TCGA     |
| TCGA-BH-A0C0 | KEAP1 | cna | gain    | TCGA     |

|              |       |     |         |          |
|--------------|-------|-----|---------|----------|
| TCGA-BH-A1FU | KEAP1 | cna | hetloss | TCGA     |
| TCGA-C8-A12L | KEAP1 | cna | amp     | TCGA     |
| TCGA-D8-A27M | KEAP1 | cna | hetloss | TCGA     |
| TCGA-EW-A10X | KEAP1 | cna | hetloss | TCGA     |
| TCGA-LL-A5YP | KEAP1 | cna | hetloss | TCGA     |
| MB-0346      | KEAP1 | cna | hetloss | METABRIC |
| MB-2827      | KEAP1 | cna | hetloss | METABRIC |
| MB-5070      | KEAP1 | cna | hetloss | METABRIC |
| MB-5465      | KEAP1 | cna | gain    | METABRIC |
| MB-6098      | KEAP1 | cna | hetloss | METABRIC |
| MB-7038      | KEAP1 | cna | hetloss | METABRIC |
| MB-0420      | KEAP1 | cna | hetloss | METABRIC |
| PD11327      | KEAP1 | cna | homdel  | BASIS    |
| PD13771      | KEAP1 | cna | gain    | BASIS    |
| PD14442      | KEAP1 | cna | hetloss | BASIS    |
| PD23562      | KEAP1 | cna | gain    | BASIS    |
| PD23574      | KEAP1 | cna | gain    | BASIS    |
| PD24206      | KEAP1 | cna | homdel  | BASIS    |
| PD3905       | KEAP1 | cna | gain    | BASIS    |
| PD4006       | KEAP1 | cna | gain    | BASIS    |
| PD4107       | KEAP1 | cna | gain    | BASIS    |
| PD4826       | KEAP1 | cna | gain    | BASIS    |
| PD4967       | KEAP1 | cna | hetloss | BASIS    |
| PD5930       | KEAP1 | cna | gain    | BASIS    |
| PD5935       | KEAP1 | cna | gain    | BASIS    |
| PD5945       | KEAP1 | cna | amp     | BASIS    |
| PD5948       | KEAP1 | cna | gain    | BASIS    |
| PD6406       | KEAP1 | cna | amp     | BASIS    |
| PD7067       | KEAP1 | cna | gain    | BASIS    |
| PD7215       | KEAP1 | cna | amp     | BASIS    |
| PD8621       | KEAP1 | cna | gain    | BASIS    |
| PD9702       | KEAP1 | cna | gain    | BASIS    |
| TCGA-A2-A25B | KIF5B | cna | gain    | TCGA     |
| TCGA-AN-A0XU | KIF5B | cna | hetloss | TCGA     |
| TCGA-AO-A0JL | KIF5B | cna | gain    | TCGA     |
| TCGA-BH-A0AW | KIF5B | cna | gain    | TCGA     |
| TCGA-BH-A0C0 | KIF5B | cna | gain    | TCGA     |
| TCGA-C8-A12L | KIF5B | cna | gain    | TCGA     |
| TCGA-LL-A5YP | KIF5B | cna | gain    | TCGA     |
| MB-6098      | KIF5B | cna | gain    | METABRIC |
| MB-7038      | KIF5B | cna | hetloss | METABRIC |
| MTS-T0064    | KIF5B | cna | gain    | METABRIC |
| PD11327      | KIF5B | cna | gain    | BASIS    |
| PD13296      | KIF5B | cna | gain    | BASIS    |
| PD13299      | KIF5B | cna | gain    | BASIS    |
| PD13771      | KIF5B | cna | gain    | BASIS    |
| PD22355      | KIF5B | cna | gain    | BASIS    |

|              |       |     |         |          |
|--------------|-------|-----|---------|----------|
| PD23562      | KIF5B | cna | gain    | BASIS    |
| PD23574      | KIF5B | cna | gain    | BASIS    |
| PD24186      | KIF5B | cna | gain    | BASIS    |
| PD24202      | KIF5B | cna | hetloss | BASIS    |
| PD24206      | KIF5B | cna | gain    | BASIS    |
| PD3905       | KIF5B | cna | gain    | BASIS    |
| PD4005       | KIF5B | cna | gain    | BASIS    |
| PD4006       | KIF5B | cna | gain    | BASIS    |
| PD4107       | KIF5B | cna | gain    | BASIS    |
| PD4826       | KIF5B | cna | gain    | BASIS    |
| PD5930       | KIF5B | cna | gain    | BASIS    |
| PD5945       | KIF5B | cna | amp     | BASIS    |
| PD5948       | KIF5B | cna | gain    | BASIS    |
| PD7067       | KIF5B | cna | amp     | BASIS    |
| PD7215       | KIF5B | cna | gain    | BASIS    |
| PD8621       | KIF5B | cna | gain    | BASIS    |
| PD8980       | KIF5B | cna | hetloss | BASIS    |
| PD9004       | KIF5B | cna | gain    | BASIS    |
| PD9702       | KIF5B | cna | gain    | BASIS    |
| TCGA-A2-A25B | LMO1  | cna | hetloss | TCGA     |
| TCGA-AN-A0XU | LMO1  | cna | hetloss | TCGA     |
| TCGA-AO-A0JL | LMO1  | cna | hetloss | TCGA     |
| TCGA-BH-A0C0 | LMO1  | cna | hetloss | TCGA     |
| TCGA-C8-A12L | LMO1  | cna | hetloss | TCGA     |
| TCGA-E2-A1L7 | LMO1  | cna | hetloss | TCGA     |
| TCGA-E9-A1NC | LMO1  | cna | hetloss | TCGA     |
| TCGA-LL-A5YP | LMO1  | cna | hetloss | TCGA     |
| MB-0346      | LMO1  | cna | hetloss | METABRIC |
| MB-5070      | LMO1  | cna | hetloss | METABRIC |
| MB-6060      | LMO1  | cna | hetloss | METABRIC |
| MB-6271      | LMO1  | cna | gain    | METABRIC |
| MB-7048      | LMO1  | cna | hetloss | METABRIC |
| PD10014      | LMO1  | cna | hetloss | BASIS    |
| PD11742      | LMO1  | cna | hetloss | BASIS    |
| PD13297      | LMO1  | cna | hetloss | BASIS    |
| PD22355      | LMO1  | cna | hetloss | BASIS    |
| PD23574      | LMO1  | cna | gain    | BASIS    |
| PD24202      | LMO1  | cna | hetloss | BASIS    |
| PD24206      | LMO1  | cna | amp     | BASIS    |
| PD3890       | LMO1  | cna | hetloss | BASIS    |
| PD3905       | LMO1  | cna | gain    | BASIS    |
| PD4005       | LMO1  | cna | hetloss | BASIS    |
| PD4006       | LMO1  | cna | gain    | BASIS    |
| PD4107       | LMO1  | cna | gain    | BASIS    |
| PD4826       | LMO1  | cna | gain    | BASIS    |
| PD5935       | LMO1  | cna | gain    | BASIS    |
| PD5945       | LMO1  | cna | gain    | BASIS    |



|              |       |     |         |          |
|--------------|-------|-----|---------|----------|
| PD6406       | LMO1  | cna | hetloss | BASIS    |
| PD6413       | LMO1  | cna | hetloss | BASIS    |
| PD6731       | LMO1  | cna | hetloss | BASIS    |
| PD7215       | LMO1  | cna | hetloss | BASIS    |
| PD8980       | LMO1  | cna | hetloss | BASIS    |
| PD9585       | LMO1  | cna | hetloss | BASIS    |
| TCGA-AN-A0XU | LMO2  | cna | gain    | TCGA     |
| TCGA-AO-A0JL | LMO2  | cna | hetloss | TCGA     |
| TCGA-BH-A0C0 | LMO2  | cna | gain    | TCGA     |
| TCGA-C8-A12L | LMO2  | cna | hetloss | TCGA     |
| TCGA-E2-A1L7 | LMO2  | cna | gain    | TCGA     |
| TCGA-LL-A5YP | LMO2  | cna | amp     | TCGA     |
| MB-0346      | LMO2  | cna | hetloss | METABRIC |
| MB-6060      | LMO2  | cna | gain    | METABRIC |
| MB-6098      | LMO2  | cna | hetloss | METABRIC |
| MB-6271      | LMO2  | cna | gain    | METABRIC |
| MB-7048      | LMO2  | cna | hetloss | METABRIC |
| PD10014      | LMO2  | cna | hetloss | BASIS    |
| PD11327      | LMO2  | cna | homdel  | BASIS    |
| PD13296      | LMO2  | cna | gain    | BASIS    |
| PD13299      | LMO2  | cna | hetloss | BASIS    |
| PD23562      | LMO2  | cna | gain    | BASIS    |
| PD23578      | LMO2  | cna | hetloss | BASIS    |
| PD24186      | LMO2  | cna | gain    | BASIS    |
| PD24206      | LMO2  | cna | gain    | BASIS    |
| PD3905       | LMO2  | cna | gain    | BASIS    |
| PD4006       | LMO2  | cna | hetloss | BASIS    |
| PD4107       | LMO2  | cna | gain    | BASIS    |
| PD4826       | LMO2  | cna | gain    | BASIS    |
| PD5930       | LMO2  | cna | gain    | BASIS    |
| PD5935       | LMO2  | cna | gain    | BASIS    |
| PD5945       | LMO2  | cna | gain    | BASIS    |
| PD5948       | LMO2  | cna | gain    | BASIS    |
| PD6413       | LMO2  | cna | hetloss | BASIS    |
| PD6731       | LMO2  | cna | hetloss | BASIS    |
| PD7215       | LMO2  | cna | gain    | BASIS    |
| PD8621       | LMO2  | cna | gain    | BASIS    |
| PD8980       | LMO2  | cna | homdel  | BASIS    |
| PD9585       | LMO2  | cna | hetloss | BASIS    |
| PD9702       | LMO2  | cna | gain    | BASIS    |
| TCGA-AN-A0XU | LRP1B | cna | hetloss | TCGA     |
| TCGA-AO-A0JL | LRP1B | cna | gain    | TCGA     |
| TCGA-D8-A27M | LRP1B | cna | gain    | TCGA     |
| TCGA-E9-A1NC | LRP1B | cna | gain    | TCGA     |
| TCGA-LL-A5YP | LRP1B | cna | hetloss | TCGA     |
| MB-2827      | LRP1B | cna | hetloss | METABRIC |
| MB-5107      | LRP1B | cna | hetloss | METABRIC |

|              |       |     |         |          |
|--------------|-------|-----|---------|----------|
| MB-6098      | LRP1B | cna | hetloss | METABRIC |
| MB-6271      | LRP1B | cna | hetloss | METABRIC |
| PD11327      | LRP1B | cna | gain    | BASIS    |
| PD11742      | LRP1B | cna | hetloss | BASIS    |
| PD13296      | LRP1B | cna | hetloss | BASIS    |
| PD13297      | LRP1B | cna | hetloss | BASIS    |
| PD13299      | LRP1B | cna | gain    | BASIS    |
| PD22355      | LRP1B | cna | hetloss | BASIS    |
| PD23574      | LRP1B | cna | amp     | BASIS    |
| PD23578      | LRP1B | cna | hetloss | BASIS    |
| PD24186      | LRP1B | cna | gain    | BASIS    |
| PD24202      | LRP1B | cna | hetloss | BASIS    |
| PD24206      | LRP1B | cna | gain    | BASIS    |
| PD3890       | LRP1B | cna | hetloss | BASIS    |
| PD3905       | LRP1B | cna | gain    | BASIS    |
| PD4005       | LRP1B | cna | hetloss | BASIS    |
| PD4006       | LRP1B | cna | homdel  | BASIS    |
| PD4107       | LRP1B | cna | gain    | BASIS    |
| PD4967       | LRP1B | cna | hetloss | BASIS    |
| PD5935       | LRP1B | cna | gain    | BASIS    |
| PD5945       | LRP1B | cna | gain    | BASIS    |
| PD5948       | LRP1B | cna | gain    | BASIS    |
| PD6406       | LRP1B | cna | hetloss | BASIS    |
| PD6413       | LRP1B | cna | hetloss | BASIS    |
| PD7215       | LRP1B | cna | gain    | BASIS    |
| PD8621       | LRP1B | cna | hetloss | BASIS    |
| PD9702       | LRP1B | cna | gain    | BASIS    |
| TCGA-A2-A25B | LRP5  | cna | hetloss | TCGA     |
| TCGA-AN-A0XU | LRP5  | cna | hetloss | TCGA     |
| TCGA-AO-A0JL | LRP5  | cna | hetloss | TCGA     |
| TCGA-BH-A18R | LRP5  | cna | homdel  | TCGA     |
| TCGA-C8-A12L | LRP5  | cna | gain    | TCGA     |
| TCGA-EW-A10X | LRP5  | cna | amp     | TCGA     |
| TCGA-LL-A5YP | LRP5  | cna | hetloss | TCGA     |
| MB-0346      | LRP5  | cna | gain    | METABRIC |
| MB-5107      | LRP5  | cna | gain    | METABRIC |
| MB-6271      | LRP5  | cna | gain    | METABRIC |
| MB-7038      | LRP5  | cna | gain    | METABRIC |
| PD11327      | LRP5  | cna | gain    | BASIS    |
| PD11742      | LRP5  | cna | gain    | BASIS    |
| PD13771      | LRP5  | cna | amp     | BASIS    |
| PD22355      | LRP5  | cna | hetloss | BASIS    |
| PD23574      | LRP5  | cna | gain    | BASIS    |
| PD24186      | LRP5  | cna | amp     | BASIS    |
| PD24206      | LRP5  | cna | gain    | BASIS    |
| PD3905       | LRP5  | cna | gain    | BASIS    |
| PD4005       | LRP5  | cna | gain    | BASIS    |

|              |       |     |         |          |
|--------------|-------|-----|---------|----------|
| PD4006       | LRP5  | cna | amp     | BASIS    |
| PD4107       | LRP5  | cna | gain    | BASIS    |
| PD4826       | LRP5  | cna | gain    | BASIS    |
| PD5930       | LRP5  | cna | gain    | BASIS    |
| PD5935       | LRP5  | cna | gain    | BASIS    |
| PD5945       | LRP5  | cna | amp     | BASIS    |
| PD5948       | LRP5  | cna | amp     | BASIS    |
| PD6413       | LRP5  | cna | gain    | BASIS    |
| PD7067       | LRP5  | cna | gain    | BASIS    |
| PD7215       | LRP5  | cna | gain    | BASIS    |
| PD8621       | LRP5  | cna | gain    | BASIS    |
| PD8980       | LRP5  | cna | gain    | BASIS    |
| PD9004       | LRP5  | cna | gain    | BASIS    |
| PD9702       | LRP5  | cna | gain    | BASIS    |
| TCGA-A2-A25B | LRRK2 | cna | gain    | TCGA     |
| TCGA-AN-A0XU | LRRK2 | cna | gain    | TCGA     |
| TCGA-BH-A0C0 | LRRK2 | cna | hetloss | TCGA     |
| TCGA-BH-A18R | LRRK2 | cna | gain    | TCGA     |
| TCGA-BH-A1FU | LRRK2 | cna | hetloss | TCGA     |
| TCGA-C8-A12L | LRRK2 | cna | gain    | TCGA     |
| TCGA-D8-A27M | LRRK2 | cna | gain    | TCGA     |
| TCGA-E2-A1L7 | LRRK2 | cna | hetloss | TCGA     |
| TCGA-LL-A5YP | LRRK2 | cna | hetloss | TCGA     |
| MB-0346      | LRRK2 | cna | gain    | METABRIC |
| MB-2827      | LRRK2 | cna | hetloss | METABRIC |
| MB-5070      | LRRK2 | cna | hetloss | METABRIC |
| MB-6098      | LRRK2 | cna | gain    | METABRIC |
| MTS-T0064    | LRRK2 | cna | gain    | METABRIC |
| PD10014      | LRRK2 | cna | gain    | BASIS    |
| PD11327      | LRRK2 | cna | amp     | BASIS    |
| PD13296      | LRRK2 | cna | gain    | BASIS    |
| PD13297      | LRRK2 | cna | hetloss | BASIS    |
| PD23574      | LRRK2 | cna | gain    | BASIS    |
| PD24186      | LRRK2 | cna | gain    | BASIS    |
| PD24202      | LRRK2 | cna | hetloss | BASIS    |
| PD24206      | LRRK2 | cna | gain    | BASIS    |
| PD3905       | LRRK2 | cna | gain    | BASIS    |
| PD4005       | LRRK2 | cna | hetloss | BASIS    |
| PD4107       | LRRK2 | cna | gain    | BASIS    |
| PD4826       | LRRK2 | cna | gain    | BASIS    |
| PD5935       | LRRK2 | cna | gain    | BASIS    |
| PD5945       | LRRK2 | cna | amp     | BASIS    |
| PD5948       | LRRK2 | cna | gain    | BASIS    |
| PD6731       | LRRK2 | cna | hetloss | BASIS    |
| PD7067       | LRRK2 | cna | gain    | BASIS    |
| PD9004       | LRRK2 | cna | hetloss | BASIS    |
| PD9585       | LRRK2 | cna | hetloss | BASIS    |

|              |        |     |         |          |
|--------------|--------|-----|---------|----------|
| PD9702       | LRRK2  | cna | gain    | BASIS    |
| TCGA-A2-A25B | MAP3K8 | cna | gain    | TCGA     |
| TCGA-AN-A0XU | MAP3K8 | cna | hetloss | TCGA     |
| TCGA-AO-A0JL | MAP3K8 | cna | gain    | TCGA     |
| TCGA-BH-A0AW | MAP3K8 | cna | gain    | TCGA     |
| TCGA-BH-A0C0 | MAP3K8 | cna | gain    | TCGA     |
| TCGA-C8-A12L | MAP3K8 | cna | gain    | TCGA     |
| TCGA-LL-A5YP | MAP3K8 | cna | gain    | TCGA     |
| MB-6098      | MAP3K8 | cna | gain    | METABRIC |
| MB-7038      | MAP3K8 | cna | hetloss | METABRIC |
| MTS-T0064    | MAP3K8 | cna | gain    | METABRIC |
| PD11327      | MAP3K8 | cna | gain    | BASIS    |
| PD13296      | MAP3K8 | cna | gain    | BASIS    |
| PD13299      | MAP3K8 | cna | gain    | BASIS    |
| PD13771      | MAP3K8 | cna | gain    | BASIS    |
| PD23562      | MAP3K8 | cna | gain    | BASIS    |
| PD23574      | MAP3K8 | cna | gain    | BASIS    |
| PD24186      | MAP3K8 | cna | gain    | BASIS    |
| PD24202      | MAP3K8 | cna | hetloss | BASIS    |
| PD3905       | MAP3K8 | cna | gain    | BASIS    |
| PD4005       | MAP3K8 | cna | gain    | BASIS    |
| PD4006       | MAP3K8 | cna | gain    | BASIS    |
| PD4107       | MAP3K8 | cna | gain    | BASIS    |
| PD4826       | MAP3K8 | cna | gain    | BASIS    |
| PD5930       | MAP3K8 | cna | gain    | BASIS    |
| PD5935       | MAP3K8 | cna | gain    | BASIS    |
| PD5945       | MAP3K8 | cna | amp     | BASIS    |
| PD5948       | MAP3K8 | cna | gain    | BASIS    |
| PD6413       | MAP3K8 | cna | gain    | BASIS    |
| PD7067       | MAP3K8 | cna | amp     | BASIS    |
| PD7215       | MAP3K8 | cna | gain    | BASIS    |
| PD8621       | MAP3K8 | cna | gain    | BASIS    |
| PD8980       | MAP3K8 | cna | hetloss | BASIS    |
| PD9004       | MAP3K8 | cna | gain    | BASIS    |
| PD9702       | MAP3K8 | cna | gain    | BASIS    |
| TCGA-A2-A25B | MDM2   | cna | gain    | TCGA     |
| TCGA-AO-A0JL | MDM2   | cna | hetloss | TCGA     |
| TCGA-BH-A18R | MDM2   | cna | gain    | TCGA     |
| TCGA-BH-A1FU | MDM2   | cna | hetloss | TCGA     |
| TCGA-C8-A12L | MDM2   | cna | gain    | TCGA     |
| TCGA-E2-A1L7 | MDM2   | cna | hetloss | TCGA     |
| TCGA-LL-A5YP | MDM2   | cna | hetloss | TCGA     |
| MB-0346      | MDM2   | cna | gain    | METABRIC |
| MB-2827      | MDM2   | cna | hetloss | METABRIC |
| MB-5070      | MDM2   | cna | gain    | METABRIC |
| MB-5107      | MDM2   | cna | gain    | METABRIC |
| MB-5465      | MDM2   | cna | gain    | METABRIC |

|              |      |     |         |          |
|--------------|------|-----|---------|----------|
| MB-6098      | MDM2 | cna | gain    | METABRIC |
| MTS-T0064    | MDM2 | cna | gain    | METABRIC |
| PD11327      | MDM2 | cna | homdel  | BASIS    |
| PD11742      | MDM2 | cna | gain    | BASIS    |
| PD22355      | MDM2 | cna | hetloss | BASIS    |
| PD23578      | MDM2 | cna | gain    | BASIS    |
| PD24186      | MDM2 | cna | gain    | BASIS    |
| PD24202      | MDM2 | cna | hetloss | BASIS    |
| PD24206      | MDM2 | cna | gain    | BASIS    |
| PD3890       | MDM2 | cna | hetloss | BASIS    |
| PD3905       | MDM2 | cna | gain    | BASIS    |
| PD4005       | MDM2 | cna | hetloss | BASIS    |
| PD4006       | MDM2 | cna | gain    | BASIS    |
| PD4826       | MDM2 | cna | gain    | BASIS    |
| PD5945       | MDM2 | cna | gain    | BASIS    |
| PD6406       | MDM2 | cna | hetloss | BASIS    |
| PD6413       | MDM2 | cna | hetloss | BASIS    |
| PD6731       | MDM2 | cna | hetloss | BASIS    |
| PD7067       | MDM2 | cna | gain    | BASIS    |
| PD8621       | MDM2 | cna | hetloss | BASIS    |
| PD9585       | MDM2 | cna | hetloss | BASIS    |
| PD9702       | MDM2 | cna | amp     | BASIS    |
| TCGA-AN-A0XU | MIB1 | cna | hetloss | TCGA     |
| TCGA-AO-A0JL | MIB1 | cna | gain    | TCGA     |
| TCGA-BH-A0AW | MIB1 | cna | gain    | TCGA     |
| TCGA-BH-A0C0 | MIB1 | cna | gain    | TCGA     |
| TCGA-C8-A12L | MIB1 | cna | gain    | TCGA     |
| TCGA-D8-A27M | MIB1 | cna | hetloss | TCGA     |
| TCGA-E2-A1L7 | MIB1 | cna | gain    | TCGA     |
| TCGA-LL-A5YP | MIB1 | cna | amp     | TCGA     |
| MB-5465      | MIB1 | cna | hetloss | METABRIC |
| PD10014      | MIB1 | cna | gain    | BASIS    |
| PD11327      | MIB1 | cna | gain    | BASIS    |
| PD13296      | MIB1 | cna | hetloss | BASIS    |
| PD13297      | MIB1 | cna | gain    | BASIS    |
| PD13299      | MIB1 | cna | gain    | BASIS    |
| PD23562      | MIB1 | cna | gain    | BASIS    |
| PD23574      | MIB1 | cna | gain    | BASIS    |
| PD24186      | MIB1 | cna | gain    | BASIS    |
| PD24202      | MIB1 | cna | hetloss | BASIS    |
| PD24206      | MIB1 | cna | gain    | BASIS    |
| PD24337      | MIB1 | cna | gain    | BASIS    |
| PD3890       | MIB1 | cna | gain    | BASIS    |
| PD3905       | MIB1 | cna | gain    | BASIS    |
| PD4006       | MIB1 | cna | gain    | BASIS    |
| PD4107       | MIB1 | cna | gain    | BASIS    |
| PD4967       | MIB1 | cna | hetloss | BASIS    |

|              |       |     |         |          |
|--------------|-------|-----|---------|----------|
| PD5930       | MIB1  | cna | gain    | BASIS    |
| PD5935       | MIB1  | cna | gain    | BASIS    |
| PD5945       | MIB1  | cna | amp     | BASIS    |
| PD5948       | MIB1  | cna | gain    | BASIS    |
| PD7067       | MIB1  | cna | gain    | BASIS    |
| PD7215       | MIB1  | cna | gain    | BASIS    |
| PD8980       | MIB1  | cna | hetloss | BASIS    |
| PD9004       | MIB1  | cna | gain    | BASIS    |
| PD9702       | MIB1  | cna | gain    | BASIS    |
| TCGA-AN-A0XU | MLLT1 | cna | hetloss | TCGA     |
| TCGA-AO-A0JL | MLLT1 | cna | gain    | TCGA     |
| TCGA-BH-A0C0 | MLLT1 | cna | gain    | TCGA     |
| TCGA-BH-A1FU | MLLT1 | cna | hetloss | TCGA     |
| TCGA-C8-A12L | MLLT1 | cna | hetloss | TCGA     |
| TCGA-D8-A27M | MLLT1 | cna | hetloss | TCGA     |
| TCGA-E9-A1NC | MLLT1 | cna | hetloss | TCGA     |
| TCGA-EW-A10X | MLLT1 | cna | hetloss | TCGA     |
| TCGA-LL-A5YP | MLLT1 | cna | hetloss | TCGA     |
| MB-0346      | MLLT1 | cna | gain    | METABRIC |
| MB-2827      | MLLT1 | cna | hetloss | METABRIC |
| MB-5070      | MLLT1 | cna | hetloss | METABRIC |
| MB-5465      | MLLT1 | cna | gain    | METABRIC |
| MB-6098      | MLLT1 | cna | hetloss | METABRIC |
| MB-7038      | MLLT1 | cna | hetloss | METABRIC |
| MB-0420      | MLLT1 | cna | hetloss | METABRIC |
| PD10014      | MLLT1 | cna | hetloss | BASIS    |
| PD14442      | MLLT1 | cna | hetloss | BASIS    |
| PD23574      | MLLT1 | cna | gain    | BASIS    |
| PD24202      | MLLT1 | cna | gain    | BASIS    |
| PD24206      | MLLT1 | cna | hetloss | BASIS    |
| PD3905       | MLLT1 | cna | gain    | BASIS    |
| PD4006       | MLLT1 | cna | gain    | BASIS    |
| PD4107       | MLLT1 | cna | gain    | BASIS    |
| PD4826       | MLLT1 | cna | gain    | BASIS    |
| PD4967       | MLLT1 | cna | homdel  | BASIS    |
| PD5930       | MLLT1 | cna | gain    | BASIS    |
| PD5945       | MLLT1 | cna | gain    | BASIS    |
| PD5948       | MLLT1 | cna | gain    | BASIS    |
| PD7067       | MLLT1 | cna | gain    | BASIS    |
| PD7215       | MLLT1 | cna | amp     | BASIS    |
| PD8621       | MLLT1 | cna | gain    | BASIS    |
| PD8980       | MLLT1 | cna | gain    | BASIS    |
| PD9702       | MLLT1 | cna | gain    | BASIS    |
| TCGA-A2-A25B | MPL   | cna | hetloss | TCGA     |
| TCGA-AN-A0XU | MPL   | cna | gain    | TCGA     |
| TCGA-AO-A0JL | MPL   | cna | hetloss | TCGA     |
| TCGA-BH-A0AW | MPL   | cna | gain    | TCGA     |

|              |       |     |         |          |
|--------------|-------|-----|---------|----------|
| TCGA-BH-A0C0 | MPL   | cna | gain    | TCGA     |
| TCGA-BH-A1FU | MPL   | cna | gain    | TCGA     |
| TCGA-C8-A12L | MPL   | cna | hetloss | TCGA     |
| TCGA-D8-A27M | MPL   | cna | gain    | TCGA     |
| TCGA-E2-A1L7 | MPL   | cna | gain    | TCGA     |
| TCGA-LL-A5YP | MPL   | cna | gain    | TCGA     |
| MB-0346      | MPL   | cna | hetloss | METABRIC |
| MB-6060      | MPL   | cna | hetloss | METABRIC |
| MB-6098      | MPL   | cna | gain    | METABRIC |
| MB-7038      | MPL   | cna | gain    | METABRIC |
| MB-0420      | MPL   | cna | hetloss | METABRIC |
| PD13296      | MPL   | cna | gain    | BASIS    |
| PD13299      | MPL   | cna | gain    | BASIS    |
| PD24186      | MPL   | cna | amp     | BASIS    |
| PD24202      | MPL   | cna | gain    | BASIS    |
| PD24206      | MPL   | cna | gain    | BASIS    |
| PD24337      | MPL   | cna | gain    | BASIS    |
| PD3905       | MPL   | cna | gain    | BASIS    |
| PD4006       | MPL   | cna | gain    | BASIS    |
| PD4107       | MPL   | cna | gain    | BASIS    |
| PD4826       | MPL   | cna | gain    | BASIS    |
| PD5935       | MPL   | cna | gain    | BASIS    |
| PD5945       | MPL   | cna | amp     | BASIS    |
| PD5948       | MPL   | cna | gain    | BASIS    |
| PD7067       | MPL   | cna | gain    | BASIS    |
| PD7215       | MPL   | cna | gain    | BASIS    |
| PD8621       | MPL   | cna | gain    | BASIS    |
| PD8980       | MPL   | cna | gain    | BASIS    |
| PD9004       | MPL   | cna | gain    | BASIS    |
| PD9702       | MPL   | cna | gain    | BASIS    |
| TCGA-AN-A0XU | MYH11 | cna | gain    | TCGA     |
| TCGA-AO-A0JL | MYH11 | cna | gain    | TCGA     |
| TCGA-BH-A0AW | MYH11 | cna | gain    | TCGA     |
| TCGA-BH-A0C0 | MYH11 | cna | gain    | TCGA     |
| TCGA-C8-A12L | MYH11 | cna | gain    | TCGA     |
| TCGA-E2-A1L7 | MYH11 | cna | hetloss | TCGA     |
| TCGA-LL-A5YP | MYH11 | cna | gain    | TCGA     |
| MB-6060      | MYH11 | cna | gain    | METABRIC |
| MB-6271      | MYH11 | cna | gain    | METABRIC |
| MB-7032      | MYH11 | cna | gain    | METABRIC |
| MB-7038      | MYH11 | cna | hetloss | METABRIC |
| MB-0420      | MYH11 | cna | hetloss | METABRIC |
| PD10014      | MYH11 | cna | hetloss | BASIS    |
| PD11327      | MYH11 | cna | hetloss | BASIS    |
| PD11742      | MYH11 | cna | gain    | BASIS    |
| PD13296      | MYH11 | cna | gain    | BASIS    |
| PD13297      | MYH11 | cna | hetloss | BASIS    |

|              |       |     |         |          |
|--------------|-------|-----|---------|----------|
| PD13299      | MYH11 | cna | gain    | BASIS    |
| PD22355      | MYH11 | cna | hetloss | BASIS    |
| PD24186      | MYH11 | cna | gain    | BASIS    |
| PD24202      | MYH11 | cna | hetloss | BASIS    |
| PD3905       | MYH11 | cna | gain    | BASIS    |
| PD4005       | MYH11 | cna | gain    | BASIS    |
| PD4006       | MYH11 | cna | gain    | BASIS    |
| PD4107       | MYH11 | cna | gain    | BASIS    |
| PD4826       | MYH11 | cna | gain    | BASIS    |
| PD5935       | MYH11 | cna | gain    | BASIS    |
| PD5945       | MYH11 | cna | gain    | BASIS    |
| PD5948       | MYH11 | cna | gain    | BASIS    |
| PD7067       | MYH11 | cna | gain    | BASIS    |
| PD7215       | MYH11 | cna | amp     | BASIS    |
| PD8980       | MYH11 | cna | hetloss | BASIS    |
| PD9004       | MYH11 | cna | gain    | BASIS    |
| PD9585       | MYH11 | cna | hetloss | BASIS    |
| TCGA-A2-A25B | NCOR2 | cna | gain    | TCGA     |
| TCGA-AN-A0XU | NCOR2 | cna | hetloss | TCGA     |
| TCGA-AO-A0JL | NCOR2 | cna | hetloss | TCGA     |
| TCGA-BH-A0C0 | NCOR2 | cna | hetloss | TCGA     |
| TCGA-BH-A18R | NCOR2 | cna | gain    | TCGA     |
| TCGA-BH-A1FU | NCOR2 | cna | hetloss | TCGA     |
| TCGA-D8-A27M | NCOR2 | cna | hetloss | TCGA     |
| TCGA-E2-A1L7 | NCOR2 | cna | hetloss | TCGA     |
| TCGA-LL-A5YP | NCOR2 | cna | hetloss | TCGA     |
| MB-0346      | NCOR2 | cna | amp     | METABRIC |
| MB-2827      | NCOR2 | cna | hetloss | METABRIC |
| MB-5070      | NCOR2 | cna | hetloss | METABRIC |
| MB-7048      | NCOR2 | cna | hetloss | METABRIC |
| MTS-T0064    | NCOR2 | cna | amp     | METABRIC |
| PD11327      | NCOR2 | cna | gain    | BASIS    |
| PD13296      | NCOR2 | cna | hetloss | BASIS    |
| PD13297      | NCOR2 | cna | gain    | BASIS    |
| PD13771      | NCOR2 | cna | gain    | BASIS    |
| PD22355      | NCOR2 | cna | hetloss | BASIS    |
| PD23574      | NCOR2 | cna | gain    | BASIS    |
| PD23578      | NCOR2 | cna | hetloss | BASIS    |
| PD3890       | NCOR2 | cna | hetloss | BASIS    |
| PD3905       | NCOR2 | cna | gain    | BASIS    |
| PD4005       | NCOR2 | cna | hetloss | BASIS    |
| PD4006       | NCOR2 | cna | amp     | BASIS    |
| PD4107       | NCOR2 | cna | gain    | BASIS    |
| PD4826       | NCOR2 | cna | gain    | BASIS    |
| PD5935       | NCOR2 | cna | gain    | BASIS    |
| PD5945       | NCOR2 | cna | gain    | BASIS    |
| PD5948       | NCOR2 | cna | gain    | BASIS    |



|              |        |     |         |          |
|--------------|--------|-----|---------|----------|
| PD6731       | NCOR2  | cna | hetloss | BASIS    |
| PD7067       | NCOR2  | cna | gain    | BASIS    |
| PD9585       | NCOR2  | cna | hetloss | BASIS    |
| PD9702       | NCOR2  | cna | gain    | BASIS    |
| TCGA-A2-A25B | NEFH   | cna | hetloss | TCGA     |
| TCGA-BH-A0C0 | NEFH   | cna | gain    | TCGA     |
| TCGA-BH-A1FU | NEFH   | cna | gain    | TCGA     |
| TCGA-C8-A12L | NEFH   | cna | gain    | TCGA     |
| TCGA-D8-A27M | NEFH   | cna | gain    | TCGA     |
| TCGA-E9-A1NC | NEFH   | cna | gain    | TCGA     |
| TCGA-LL-A5YP | NEFH   | cna | gain    | TCGA     |
| MB-0346      | NEFH   | cna | gain    | METABRIC |
| MB-6060      | NEFH   | cna | gain    | METABRIC |
| MB-6098      | NEFH   | cna | gain    | METABRIC |
| PD11327      | NEFH   | cna | gain    | BASIS    |
| PD13296      | NEFH   | cna | gain    | BASIS    |
| PD13297      | NEFH   | cna | gain    | BASIS    |
| PD13299      | NEFH   | cna | gain    | BASIS    |
| PD13771      | NEFH   | cna | gain    | BASIS    |
| PD14442      | NEFH   | cna | hetloss | BASIS    |
| PD23562      | NEFH   | cna | gain    | BASIS    |
| PD23574      | NEFH   | cna | gain    | BASIS    |
| PD24206      | NEFH   | cna | hetloss | BASIS    |
| PD3905       | NEFH   | cna | gain    | BASIS    |
| PD4006       | NEFH   | cna | gain    | BASIS    |
| PD4107       | NEFH   | cna | amp     | BASIS    |
| PD4826       | NEFH   | cna | gain    | BASIS    |
| PD4967       | NEFH   | cna | hetloss | BASIS    |
| PD5930       | NEFH   | cna | gain    | BASIS    |
| PD5935       | NEFH   | cna | gain    | BASIS    |
| PD5945       | NEFH   | cna | amp     | BASIS    |
| PD5948       | NEFH   | cna | gain    | BASIS    |
| PD6731       | NEFH   | cna | hetloss | BASIS    |
| PD7067       | NEFH   | cna | gain    | BASIS    |
| PD7215       | NEFH   | cna | gain    | BASIS    |
| PD8621       | NEFH   | cna | gain    | BASIS    |
| PD9004       | NEFH   | cna | gain    | BASIS    |
| PD9702       | NEFH   | cna | gain    | BASIS    |
| MB-0346      | NKX3-1 | cna | hetloss | METABRIC |
| MB-2827      | NKX3-1 | cna | hetloss | METABRIC |
| MB-5070      | NKX3-1 | cna | hetloss | METABRIC |
| MB-5465      | NKX3-1 | cna | hetloss | METABRIC |
| MB-6060      | NKX3-1 | cna | hetloss | METABRIC |
| MB-6098      | NKX3-1 | cna | hetloss | METABRIC |
| MB-7038      | NKX3-1 | cna | hetloss | METABRIC |
| MB-0420      | NKX3-1 | cna | hetloss | METABRIC |
| MTS-T0064    | NKX3-1 | cna | hetloss | METABRIC |

|                   |        |     |         |            |
|-------------------|--------|-----|---------|------------|
| PD10014           | NKX3-1 | cna | hetloss | BASIS      |
| PD11327           | NKX3-1 | cna | hetloss | BASIS      |
| PD13296           | NKX3-1 | cna | hetloss | BASIS      |
| PD13299           | NKX3-1 | cna | hetloss | BASIS      |
| PD13771           | NKX3-1 | cna | hetloss | BASIS      |
| PD14442           | NKX3-1 | cna | hetloss | BASIS      |
| PD22355           | NKX3-1 | cna | hetloss | BASIS      |
| PD23562           | NKX3-1 | cna | hetloss | BASIS      |
| PD23574           | NKX3-1 | cna | hetloss | BASIS      |
| PD23578           | NKX3-1 | cna | hetloss | BASIS      |
| PD24186           | NKX3-1 | cna | gain    | BASIS      |
| PD24202           | NKX3-1 | cna | hetloss | BASIS      |
| PD24206           | NKX3-1 | cna | hetloss | BASIS      |
| PD24337           | NKX3-1 | cna | hetloss | BASIS      |
| PD3905            | NKX3-1 | cna | gain    | BASIS      |
| PD4005            | NKX3-1 | cna | hetloss | BASIS      |
| PD4006            | NKX3-1 | cna | gain    | BASIS      |
| PD4826            | NKX3-1 | cna | hetloss | BASIS      |
| PD5935            | NKX3-1 | cna | gain    | BASIS      |
| PD5945            | NKX3-1 | cna | gain    | BASIS      |
| PD6406            | NKX3-1 | cna | hetloss | BASIS      |
| PD6413            | NKX3-1 | cna | hetloss | BASIS      |
| PD7067            | NKX3-1 | cna | homdel  | BASIS      |
| PD8980            | NKX3-1 | cna | hetloss | BASIS      |
| PD9004            | NKX3-1 | cna | hetloss | BASIS      |
| TCGA-AO-A0JL      | NOTCH3 | cna | gain    | TCGA       |
| TCGA-BH-A0C0      | NOTCH3 | cna | gain    | TCGA       |
| TCGA-BH-A1FU      | NOTCH3 | cna | hetloss | TCGA       |
| TCGA-C8-A12L      | NOTCH3 | cna | gain    | TCGA       |
| TCGA-D8-A27M      | NOTCH3 | cna | hetloss | TCGA       |
| TCGA-EW-A10X      | NOTCH3 | cna | hetloss | TCGA       |
| TCGA-LL-A5YP      | NOTCH3 | cna | hetloss | TCGA       |
| MB-0346           | NOTCH3 | cna | hetloss | METABRIC   |
| MB-2827           | NOTCH3 | cna | hetloss | METABRIC   |
| MB-5465           | NOTCH3 | cna | gain    | METABRIC   |
| MB-6098           | NOTCH3 | cna | hetloss | METABRIC   |
| MB-7038           | NOTCH3 | cna | gain    | METABRIC   |
| MB-0420           | NOTCH3 | cna | hetloss | METABRIC   |
| P-0009557-T01-IM5 | NOTCH3 | cna | homdel  | MSK-IMPACT |
| PD14442           | NOTCH3 | cna | hetloss | BASIS      |
| PD22355           | NOTCH3 | cna | gain    | BASIS      |
| PD23562           | NOTCH3 | cna | gain    | BASIS      |
| PD23574           | NOTCH3 | cna | gain    | BASIS      |
| PD24186           | NOTCH3 | cna | gain    | BASIS      |
| PD24206           | NOTCH3 | cna | hetloss | BASIS      |
| PD3905            | NOTCH3 | cna | gain    | BASIS      |
| PD4006            | NOTCH3 | cna | amp     | BASIS      |

|              |        |     |         |          |
|--------------|--------|-----|---------|----------|
| PD4107       | NOTCH3 | cna | gain    | BASIS    |
| PD4826       | NOTCH3 | cna | gain    | BASIS    |
| PD4967       | NOTCH3 | cna | hetloss | BASIS    |
| PD5930       | NOTCH3 | cna | gain    | BASIS    |
| PD5935       | NOTCH3 | cna | gain    | BASIS    |
| PD5945       | NOTCH3 | cna | amp     | BASIS    |
| PD5948       | NOTCH3 | cna | gain    | BASIS    |
| PD6413       | NOTCH3 | cna | gain    | BASIS    |
| PD7067       | NOTCH3 | cna | gain    | BASIS    |
| PD7215       | NOTCH3 | cna | amp     | BASIS    |
| PD8621       | NOTCH3 | cna | gain    | BASIS    |
| PD9702       | NOTCH3 | cna | gain    | BASIS    |
| TCGA-A2-A25B | NR4A3  | cna | gain    | TCGA     |
| TCGA-AN-A0XU | NR4A3  | cna | hetloss | TCGA     |
| TCGA-AO-A0JL | NR4A3  | cna | hetloss | TCGA     |
| TCGA-BH-A1FU | NR4A3  | cna | hetloss | TCGA     |
| TCGA-C8-A12L | NR4A3  | cna | hetloss | TCGA     |
| TCGA-E2-A1L7 | NR4A3  | cna | hetloss | TCGA     |
| TCGA-E9-A1NC | NR4A3  | cna | hetloss | TCGA     |
| TCGA-LL-A5YP | NR4A3  | cna | hetloss | TCGA     |
| MB-0346      | NR4A3  | cna | hetloss | METABRIC |
| MB-2827      | NR4A3  | cna | hetloss | METABRIC |
| MB-5070      | NR4A3  | cna | hetloss | METABRIC |
| MB-5107      | NR4A3  | cna | hetloss | METABRIC |
| MB-6098      | NR4A3  | cna | hetloss | METABRIC |
| MB-7038      | NR4A3  | cna | hetloss | METABRIC |
| MB-0420      | NR4A3  | cna | hetloss | METABRIC |
| PD11327      | NR4A3  | cna | gain    | BASIS    |
| PD23562      | NR4A3  | cna | gain    | BASIS    |
| PD23578      | NR4A3  | cna | hetloss | BASIS    |
| PD24186      | NR4A3  | cna | amp     | BASIS    |
| PD24202      | NR4A3  | cna | hetloss | BASIS    |
| PD24206      | NR4A3  | cna | gain    | BASIS    |
| PD3905       | NR4A3  | cna | gain    | BASIS    |
| PD4005       | NR4A3  | cna | gain    | BASIS    |
| PD4006       | NR4A3  | cna | gain    | BASIS    |
| PD4107       | NR4A3  | cna | hetloss | BASIS    |
| PD5945       | NR4A3  | cna | amp     | BASIS    |
| PD6406       | NR4A3  | cna | hetloss | BASIS    |
| PD6731       | NR4A3  | cna | hetloss | BASIS    |
| PD7067       | NR4A3  | cna | gain    | BASIS    |
| PD7215       | NR4A3  | cna | gain    | BASIS    |
| PD8621       | NR4A3  | cna | gain    | BASIS    |
| PD8980       | NR4A3  | cna | gain    | BASIS    |
| PD9004       | NR4A3  | cna | gain    | BASIS    |
| PD9585       | NR4A3  | cna | hetloss | BASIS    |
| TCGA-A2-A25B | NUP214 | cna | gain    | TCGA     |

|              |        |     |         |          |
|--------------|--------|-----|---------|----------|
| TCGA-AN-A0XU | NUP214 | cna | hetloss | TCGA     |
| TCGA-AO-A0JL | NUP214 | cna | hetloss | TCGA     |
| TCGA-BH-A0C0 | NUP214 | cna | gain    | TCGA     |
| TCGA-C8-A12L | NUP214 | cna | gain    | TCGA     |
| TCGA-E2-A1L7 | NUP214 | cna | gain    | TCGA     |
| TCGA-E9-A1NC | NUP214 | cna | hetloss | TCGA     |
| TCGA-LL-A5YP | NUP214 | cna | hetloss | TCGA     |
| MB-0346      | NUP214 | cna | hetloss | METABRIC |
| MB-5070      | NUP214 | cna | hetloss | METABRIC |
| MB-5107      | NUP214 | cna | gain    | METABRIC |
| MB-7038      | NUP214 | cna | hetloss | METABRIC |
| MB-0420      | NUP214 | cna | hetloss | METABRIC |
| PD10014      | NUP214 | cna | gain    | BASIS    |
| PD11327      | NUP214 | cna | hetloss | BASIS    |
| PD13299      | NUP214 | cna | gain    | BASIS    |
| PD22355      | NUP214 | cna | gain    | BASIS    |
| PD24186      | NUP214 | cna | gain    | BASIS    |
| PD24202      | NUP214 | cna | hetloss | BASIS    |
| PD24206      | NUP214 | cna | gain    | BASIS    |
| PD24337      | NUP214 | cna | hetloss | BASIS    |
| PD3890       | NUP214 | cna | hetloss | BASIS    |
| PD3905       | NUP214 | cna | gain    | BASIS    |
| PD4005       | NUP214 | cna | hetloss | BASIS    |
| PD4006       | NUP214 | cna | gain    | BASIS    |
| PD4107       | NUP214 | cna | hetloss | BASIS    |
| PD5945       | NUP214 | cna | gain    | BASIS    |
| PD5948       | NUP214 | cna | gain    | BASIS    |
| PD6406       | NUP214 | cna | hetloss | BASIS    |
| PD6731       | NUP214 | cna | hetloss | BASIS    |
| PD7067       | NUP214 | cna | gain    | BASIS    |
| PD7215       | NUP214 | cna | gain    | BASIS    |
| PD8621       | NUP214 | cna | gain    | BASIS    |
| PD9004       | NUP214 | cna | hetloss | BASIS    |
| TCGA-A2-A25B | OMD    | cna | gain    | TCGA     |
| TCGA-AN-A0XU | OMD    | cna | hetloss | TCGA     |
| TCGA-AO-A0JL | OMD    | cna | hetloss | TCGA     |
| TCGA-BH-A1FU | OMD    | cna | hetloss | TCGA     |
| TCGA-C8-A12L | OMD    | cna | hetloss | TCGA     |
| TCGA-E9-A1NC | OMD    | cna | hetloss | TCGA     |
| TCGA-LL-A5YP | OMD    | cna | hetloss | TCGA     |
| MB-0346      | OMD    | cna | hetloss | METABRIC |
| MB-2827      | OMD    | cna | amp     | METABRIC |
| MB-5070      | OMD    | cna | hetloss | METABRIC |
| MB-5107      | OMD    | cna | hetloss | METABRIC |
| MB-6098      | OMD    | cna | hetloss | METABRIC |
| MB-7038      | OMD    | cna | hetloss | METABRIC |
| MB-0420      | OMD    | cna | hetloss | METABRIC |

|              |       |     |         |          |
|--------------|-------|-----|---------|----------|
| MTS-T0064    | OMD   | cna | gain    | METABRIC |
| PD11327      | OMD   | cna | gain    | BASIS    |
| PD13771      | OMD   | cna | hetloss | BASIS    |
| PD23562      | OMD   | cna | gain    | BASIS    |
| PD23578      | OMD   | cna | hetloss | BASIS    |
| PD24186      | OMD   | cna | amp     | BASIS    |
| PD24202      | OMD   | cna | hetloss | BASIS    |
| PD24206      | OMD   | cna | gain    | BASIS    |
| PD3905       | OMD   | cna | gain    | BASIS    |
| PD4005       | OMD   | cna | gain    | BASIS    |
| PD4006       | OMD   | cna | gain    | BASIS    |
| PD4107       | OMD   | cna | gain    | BASIS    |
| PD5945       | OMD   | cna | amp     | BASIS    |
| PD5948       | OMD   | cna | gain    | BASIS    |
| PD6731       | OMD   | cna | hetloss | BASIS    |
| PD7067       | OMD   | cna | gain    | BASIS    |
| PD7215       | OMD   | cna | gain    | BASIS    |
| PD8621       | OMD   | cna | gain    | BASIS    |
| PD9004       | OMD   | cna | gain    | BASIS    |
| PD9585       | OMD   | cna | hetloss | BASIS    |
| TCGA-A2-A25B | PDGFB | cna | hetloss | TCGA     |
| TCGA-BH-A0AW | PDGFB | cna | hetloss | TCGA     |
| TCGA-BH-A1FU | PDGFB | cna | gain    | TCGA     |
| TCGA-C8-A12L | PDGFB | cna | gain    | TCGA     |
| TCGA-D8-A27M | PDGFB | cna | gain    | TCGA     |
| TCGA-E9-A1NC | PDGFB | cna | gain    | TCGA     |
| TCGA-LL-A5YP | PDGFB | cna | gain    | TCGA     |
| MB-5465      | PDGFB | cna | gain    | METABRIC |
| MB-6098      | PDGFB | cna | gain    | METABRIC |
| MTS-T0064    | PDGFB | cna | gain    | METABRIC |
| PD11742      | PDGFB | cna | hetloss | BASIS    |
| PD13296      | PDGFB | cna | gain    | BASIS    |
| PD13297      | PDGFB | cna | gain    | BASIS    |
| PD13299      | PDGFB | cna | gain    | BASIS    |
| PD14442      | PDGFB | cna | hetloss | BASIS    |
| PD22355      | PDGFB | cna | gain    | BASIS    |
| PD23562      | PDGFB | cna | gain    | BASIS    |
| PD23578      | PDGFB | cna | gain    | BASIS    |
| PD24206      | PDGFB | cna | homdel  | BASIS    |
| PD3905       | PDGFB | cna | gain    | BASIS    |
| PD4005       | PDGFB | cna | gain    | BASIS    |
| PD4006       | PDGFB | cna | gain    | BASIS    |
| PD4107       | PDGFB | cna | gain    | BASIS    |
| PD4826       | PDGFB | cna | gain    | BASIS    |
| PD4967       | PDGFB | cna | hetloss | BASIS    |
| PD5935       | PDGFB | cna | gain    | BASIS    |
| PD5945       | PDGFB | cna | amp     | BASIS    |

|              |       |     |         |          |
|--------------|-------|-----|---------|----------|
| PD5948       | PDGFB | cna | gain    | BASIS    |
| PD6731       | PDGFB | cna | hetloss | BASIS    |
| PD7067       | PDGFB | cna | gain    | BASIS    |
| PD7215       | PDGFB | cna | gain    | BASIS    |
| PD8621       | PDGFB | cna | gain    | BASIS    |
| PD9004       | PDGFB | cna | gain    | BASIS    |
| PD9702       | PDGFB | cna | gain    | BASIS    |
| TCGA-AN-A0XU | PKM   | cna | amp     | TCGA     |
| TCGA-AO-A0JL | PKM   | cna | hetloss | TCGA     |
| TCGA-BH-A0AW | PKM   | cna | hetloss | TCGA     |
| TCGA-BH-A0C0 | PKM   | cna | hetloss | TCGA     |
| TCGA-D8-A27M | PKM   | cna | hetloss | TCGA     |
| TCGA-E2-A1L7 | PKM   | cna | gain    | TCGA     |
| TCGA-LL-A5YP | PKM   | cna | amp     | TCGA     |
| MB-0346      | PKM   | cna | hetloss | METABRIC |
| MB-5070      | PKM   | cna | hetloss | METABRIC |
| MB-6060      | PKM   | cna | gain    | METABRIC |
| MB-7038      | PKM   | cna | gain    | METABRIC |
| PD11327      | PKM   | cna | gain    | BASIS    |
| PD11742      | PKM   | cna | hetloss | BASIS    |
| PD13296      | PKM   | cna | homdel  | BASIS    |
| PD13297      | PKM   | cna | hetloss | BASIS    |
| PD13299      | PKM   | cna | gain    | BASIS    |
| PD13771      | PKM   | cna | gain    | BASIS    |
| PD22355      | PKM   | cna | hetloss | BASIS    |
| PD23562      | PKM   | cna | gain    | BASIS    |
| PD23574      | PKM   | cna | gain    | BASIS    |
| PD23578      | PKM   | cna | gain    | BASIS    |
| PD24202      | PKM   | cna | hetloss | BASIS    |
| PD24206      | PKM   | cna | gain    | BASIS    |
| PD3890       | PKM   | cna | hetloss | BASIS    |
| PD3905       | PKM   | cna | gain    | BASIS    |
| PD4006       | PKM   | cna | gain    | BASIS    |
| PD5945       | PKM   | cna | gain    | BASIS    |
| PD5948       | PKM   | cna | gain    | BASIS    |
| PD6406       | PKM   | cna | hetloss | BASIS    |
| PD6413       | PKM   | cna | hetloss | BASIS    |
| PD7067       | PKM   | cna | gain    | BASIS    |
| PD8980       | PKM   | cna | gain    | BASIS    |
| PD9585       | PKM   | cna | hetloss | BASIS    |
| PD9702       | PKM   | cna | gain    | BASIS    |
| TCGA-A2-A25B | PMEL  | cna | gain    | TCGA     |
| TCGA-AO-A0JL | PMEL  | cna | hetloss | TCGA     |
| TCGA-BH-A18R | PMEL  | cna | gain    | TCGA     |
| TCGA-BH-A1FU | PMEL  | cna | hetloss | TCGA     |
| TCGA-C8-A12L | PMEL  | cna | gain    | TCGA     |
| TCGA-D8-A27M | PMEL  | cna | hetloss | TCGA     |

|              |       |     |         |          |
|--------------|-------|-----|---------|----------|
| TCGA-E2-A1L7 | PMEL  | cna | hetloss | TCGA     |
| TCGA-E9-A1NC | PMEL  | cna | hetloss | TCGA     |
| TCGA-LL-A5YP | PMEL  | cna | hetloss | TCGA     |
| MB-0346      | PMEL  | cna | gain    | METABRIC |
| MB-2827      | PMEL  | cna | hetloss | METABRIC |
| MB-6098      | PMEL  | cna | hetloss | METABRIC |
| MB-7038      | PMEL  | cna | hetloss | METABRIC |
| MB-0420      | PMEL  | cna | hetloss | METABRIC |
| PD11327      | PMEL  | cna | homdel  | BASIS    |
| PD13296      | PMEL  | cna | hetloss | BASIS    |
| PD13297      | PMEL  | cna | hetloss | BASIS    |
| PD13771      | PMEL  | cna | gain    | BASIS    |
| PD24186      | PMEL  | cna | gain    | BASIS    |
| PD24202      | PMEL  | cna | hetloss | BASIS    |
| PD24206      | PMEL  | cna | gain    | BASIS    |
| PD24337      | PMEL  | cna | hetloss | BASIS    |
| PD3890       | PMEL  | cna | hetloss | BASIS    |
| PD3905       | PMEL  | cna | gain    | BASIS    |
| PD4826       | PMEL  | cna | gain    | BASIS    |
| PD5945       | PMEL  | cna | gain    | BASIS    |
| PD5948       | PMEL  | cna | gain    | BASIS    |
| PD6406       | PMEL  | cna | hetloss | BASIS    |
| PD6413       | PMEL  | cna | hetloss | BASIS    |
| PD6731       | PMEL  | cna | hetloss | BASIS    |
| PD7067       | PMEL  | cna | gain    | BASIS    |
| PD8621       | PMEL  | cna | hetloss | BASIS    |
| PD9585       | PMEL  | cna | hetloss | BASIS    |
| PD9702       | PMEL  | cna | gain    | BASIS    |
| TCGA-AO-A0JL | PPARG | cna | hetloss | TCGA     |
| TCGA-BH-A0C0 | PPARG | cna | gain    | TCGA     |
| TCGA-BH-A18R | PPARG | cna | gain    | TCGA     |
| TCGA-BH-A1FU | PPARG | cna | hetloss | TCGA     |
| TCGA-D8-A27M | PPARG | cna | hetloss | TCGA     |
| TCGA-E9-A1NC | PPARG | cna | hetloss | TCGA     |
| TCGA-LL-A5YP | PPARG | cna | amp     | TCGA     |
| MB-5070      | PPARG | cna | hetloss | METABRIC |
| MB-7038      | PPARG | cna | hetloss | METABRIC |
| MB-7048      | PPARG | cna | hetloss | METABRIC |
| MB-0420      | PPARG | cna | hetloss | METABRIC |
| PD10014      | PPARG | cna | hetloss | BASIS    |
| PD11742      | PPARG | cna | gain    | BASIS    |
| PD13296      | PPARG | cna | gain    | BASIS    |
| PD13299      | PPARG | cna | gain    | BASIS    |
| PD13771      | PPARG | cna | gain    | BASIS    |
| PD23561      | PPARG | cna | hetloss | BASIS    |
| PD23562      | PPARG | cna | gain    | BASIS    |
| PD23574      | PPARG | cna | gain    | BASIS    |

|              |        |     |         |          |
|--------------|--------|-----|---------|----------|
| PD24206      | PPARG  | cna | gain    | BASIS    |
| PD24337      | PPARG  | cna | hetloss | BASIS    |
| PD3905       | PPARG  | cna | gain    | BASIS    |
| PD4006       | PPARG  | cna | gain    | BASIS    |
| PD4826       | PPARG  | cna | gain    | BASIS    |
| PD5945       | PPARG  | cna | amp     | BASIS    |
| PD5948       | PPARG  | cna | gain    | BASIS    |
| PD6406       | PPARG  | cna | hetloss | BASIS    |
| PD6731       | PPARG  | cna | hetloss | BASIS    |
| PD7067       | PPARG  | cna | gain    | BASIS    |
| PD7215       | PPARG  | cna | gain    | BASIS    |
| PD8980       | PPARG  | cna | gain    | BASIS    |
| PD9004       | PPARG  | cna | gain    | BASIS    |
| PD9585       | PPARG  | cna | hetloss | BASIS    |
| PD9702       | PPARG  | cna | gain    | BASIS    |
| TCGA-A2-A25B | PRKAA2 | cna | gain    | TCGA     |
| TCGA-AN-A0XU | PRKAA2 | cna | gain    | TCGA     |
| TCGA-AO-A0JL | PRKAA2 | cna | hetloss | TCGA     |
| TCGA-BH-A0AW | PRKAA2 | cna | gain    | TCGA     |
| TCGA-BH-A0C0 | PRKAA2 | cna | hetloss | TCGA     |
| TCGA-BH-A1FU | PRKAA2 | cna | gain    | TCGA     |
| TCGA-D8-A27M | PRKAA2 | cna | gain    | TCGA     |
| TCGA-E2-A1L7 | PRKAA2 | cna | amp     | TCGA     |
| TCGA-LL-A5YP | PRKAA2 | cna | hetloss | TCGA     |
| MB-0346      | PRKAA2 | cna | hetloss | METABRIC |
| MB-6060      | PRKAA2 | cna | gain    | METABRIC |
| MB-7038      | PRKAA2 | cna | gain    | METABRIC |
| MB-0420      | PRKAA2 | cna | hetloss | METABRIC |
| PD11327      | PRKAA2 | cna | gain    | BASIS    |
| PD11742      | PRKAA2 | cna | hetloss | BASIS    |
| PD13296      | PRKAA2 | cna | gain    | BASIS    |
| PD13299      | PRKAA2 | cna | gain    | BASIS    |
| PD22355      | PRKAA2 | cna | hetloss | BASIS    |
| PD23574      | PRKAA2 | cna | gain    | BASIS    |
| PD24186      | PRKAA2 | cna | amp     | BASIS    |
| PD24206      | PRKAA2 | cna | gain    | BASIS    |
| PD3890       | PRKAA2 | cna | gain    | BASIS    |
| PD3905       | PRKAA2 | cna | gain    | BASIS    |
| PD4006       | PRKAA2 | cna | gain    | BASIS    |
| PD4107       | PRKAA2 | cna | gain    | BASIS    |
| PD4826       | PRKAA2 | cna | gain    | BASIS    |
| PD5930       | PRKAA2 | cna | gain    | BASIS    |
| PD5945       | PRKAA2 | cna | amp     | BASIS    |
| PD5948       | PRKAA2 | cna | gain    | BASIS    |
| PD7067       | PRKAA2 | cna | gain    | BASIS    |
| PD7215       | PRKAA2 | cna | gain    | BASIS    |
| PD8621       | PRKAA2 | cna | gain    | BASIS    |



|              |        |     |         |          |
|--------------|--------|-----|---------|----------|
| PD9004       | PRKAA2 | cna | gain    | BASIS    |
| PD9702       | PRKAA2 | cna | gain    | BASIS    |
| TCGA-AO-A0JL | RAF1   | cna | hetloss | TCGA     |
| TCGA-BH-A0C0 | RAF1   | cna | gain    | TCGA     |
| TCGA-BH-A18R | RAF1   | cna | gain    | TCGA     |
| TCGA-BH-A1FU | RAF1   | cna | hetloss | TCGA     |
| TCGA-D8-A27M | RAF1   | cna | hetloss | TCGA     |
| TCGA-E9-A1NC | RAF1   | cna | hetloss | TCGA     |
| TCGA-LL-A5YP | RAF1   | cna | amp     | TCGA     |
| MB-5070      | RAF1   | cna | hetloss | METABRIC |
| MB-7038      | RAF1   | cna | hetloss | METABRIC |
| MB-7048      | RAF1   | cna | hetloss | METABRIC |
| MB-0420      | RAF1   | cna | hetloss | METABRIC |
| PD10014      | RAF1   | cna | hetloss | BASIS    |
| PD11742      | RAF1   | cna | gain    | BASIS    |
| PD13296      | RAF1   | cna | gain    | BASIS    |
| PD13299      | RAF1   | cna | gain    | BASIS    |
| PD13771      | RAF1   | cna | gain    | BASIS    |
| PD23561      | RAF1   | cna | hetloss | BASIS    |
| PD23562      | RAF1   | cna | gain    | BASIS    |
| PD23574      | RAF1   | cna | gain    | BASIS    |
| PD24206      | RAF1   | cna | gain    | BASIS    |
| PD24337      | RAF1   | cna | hetloss | BASIS    |
| PD3905       | RAF1   | cna | gain    | BASIS    |
| PD4006       | RAF1   | cna | gain    | BASIS    |
| PD4826       | RAF1   | cna | gain    | BASIS    |
| PD5945       | RAF1   | cna | amp     | BASIS    |
| PD5948       | RAF1   | cna | gain    | BASIS    |
| PD6406       | RAF1   | cna | hetloss | BASIS    |
| PD6731       | RAF1   | cna | hetloss | BASIS    |
| PD7067       | RAF1   | cna | gain    | BASIS    |
| PD7215       | RAF1   | cna | gain    | BASIS    |
| PD8980       | RAF1   | cna | gain    | BASIS    |
| PD9004       | RAF1   | cna | gain    | BASIS    |
| PD9585       | RAF1   | cna | hetloss | BASIS    |
| PD9702       | RAF1   | cna | gain    | BASIS    |
| TCGA-A2-A25B | ROR2   | cna | gain    | TCGA     |
| TCGA-AN-A0XU | ROR2   | cna | hetloss | TCGA     |
| TCGA-AO-A0JL | ROR2   | cna | hetloss | TCGA     |
| TCGA-BH-A1FU | ROR2   | cna | hetloss | TCGA     |
| TCGA-C8-A12L | ROR2   | cna | hetloss | TCGA     |
| TCGA-E9-A1NC | ROR2   | cna | hetloss | TCGA     |
| TCGA-LL-A5YP | ROR2   | cna | hetloss | TCGA     |
| MB-0346      | ROR2   | cna | hetloss | METABRIC |
| MB-2827      | ROR2   | cna | amp     | METABRIC |
| MB-5070      | ROR2   | cna | hetloss | METABRIC |
| MB-5107      | ROR2   | cna | hetloss | METABRIC |

|              |      |     |         |          |
|--------------|------|-----|---------|----------|
| MB-6098      | ROR2 | cna | hetloss | METABRIC |
| MB-7038      | ROR2 | cna | hetloss | METABRIC |
| MB-0420      | ROR2 | cna | hetloss | METABRIC |
| MTS-T0064    | ROR2 | cna | gain    | METABRIC |
| PD11327      | ROR2 | cna | gain    | BASIS    |
| PD13771      | ROR2 | cna | hetloss | BASIS    |
| PD23562      | ROR2 | cna | gain    | BASIS    |
| PD23578      | ROR2 | cna | hetloss | BASIS    |
| PD24186      | ROR2 | cna | amp     | BASIS    |
| PD24202      | ROR2 | cna | hetloss | BASIS    |
| PD24206      | ROR2 | cna | gain    | BASIS    |
| PD3905       | ROR2 | cna | gain    | BASIS    |
| PD4005       | ROR2 | cna | gain    | BASIS    |
| PD4006       | ROR2 | cna | gain    | BASIS    |
| PD4107       | ROR2 | cna | gain    | BASIS    |
| PD5945       | ROR2 | cna | amp     | BASIS    |
| PD5948       | ROR2 | cna | gain    | BASIS    |
| PD6731       | ROR2 | cna | hetloss | BASIS    |
| PD7067       | ROR2 | cna | gain    | BASIS    |
| PD7215       | ROR2 | cna | gain    | BASIS    |
| PD8621       | ROR2 | cna | gain    | BASIS    |
| PD9004       | ROR2 | cna | gain    | BASIS    |
| PD9585       | ROR2 | cna | hetloss | BASIS    |
| TCGA-AN-A0XU | RPL5 | cna | hetloss | TCGA     |
| TCGA-BH-A0AW | RPL5 | cna | gain    | TCGA     |
| TCGA-BH-A0C0 | RPL5 | cna | hetloss | TCGA     |
| TCGA-BH-A1FU | RPL5 | cna | gain    | TCGA     |
| TCGA-C8-A12L | RPL5 | cna | hetloss | TCGA     |
| TCGA-D8-A27M | RPL5 | cna | hetloss | TCGA     |
| TCGA-E2-A1L7 | RPL5 | cna | gain    | TCGA     |
| TCGA-LL-A5YP | RPL5 | cna | hetloss | TCGA     |
| MB-0346      | RPL5 | cna | hetloss | METABRIC |
| MB-2827      | RPL5 | cna | hetloss | METABRIC |
| MB-7048      | RPL5 | cna | hetloss | METABRIC |
| PD11327      | RPL5 | cna | hetloss | BASIS    |
| PD11742      | RPL5 | cna | hetloss | BASIS    |
| PD13299      | RPL5 | cna | gain    | BASIS    |
| PD22355      | RPL5 | cna | hetloss | BASIS    |
| PD23574      | RPL5 | cna | gain    | BASIS    |
| PD23578      | RPL5 | cna | gain    | BASIS    |
| PD24186      | RPL5 | cna | gain    | BASIS    |
| PD24202      | RPL5 | cna | gain    | BASIS    |
| PD24206      | RPL5 | cna | hetloss | BASIS    |
| PD3905       | RPL5 | cna | gain    | BASIS    |
| PD4005       | RPL5 | cna | hetloss | BASIS    |
| PD4006       | RPL5 | cna | gain    | BASIS    |
| PD4107       | RPL5 | cna | gain    | BASIS    |

|              |       |     |         |          |
|--------------|-------|-----|---------|----------|
| PD4826       | RPL5  | cna | gain    | BASIS    |
| PD5930       | RPL5  | cna | gain    | BASIS    |
| PD5945       | RPL5  | cna | gain    | BASIS    |
| PD5948       | RPL5  | cna | gain    | BASIS    |
| PD7067       | RPL5  | cna | gain    | BASIS    |
| PD7215       | RPL5  | cna | gain    | BASIS    |
| PD8621       | RPL5  | cna | gain    | BASIS    |
| PD9004       | RPL5  | cna | gain    | BASIS    |
| PD9585       | RPL5  | cna | hetloss | BASIS    |
| PD9702       | RPL5  | cna | gain    | BASIS    |
| TCGA-A2-A25B | RPS26 | cna | gain    | TCGA     |
| TCGA-AO-A0JL | RPS26 | cna | hetloss | TCGA     |
| TCGA-BH-A18R | RPS26 | cna | gain    | TCGA     |
| TCGA-BH-A1FU | RPS26 | cna | hetloss | TCGA     |
| TCGA-C8-A12L | RPS26 | cna | gain    | TCGA     |
| TCGA-D8-A27M | RPS26 | cna | hetloss | TCGA     |
| TCGA-E2-A1L7 | RPS26 | cna | hetloss | TCGA     |
| TCGA-E9-A1NC | RPS26 | cna | hetloss | TCGA     |
| TCGA-LL-A5YP | RPS26 | cna | hetloss | TCGA     |
| MB-0346      | RPS26 | cna | gain    | METABRIC |
| MB-2827      | RPS26 | cna | hetloss | METABRIC |
| MB-6098      | RPS26 | cna | hetloss | METABRIC |
| MB-7038      | RPS26 | cna | hetloss | METABRIC |
| MB-0420      | RPS26 | cna | hetloss | METABRIC |
| PD11327      | RPS26 | cna | homdel  | BASIS    |
| PD13296      | RPS26 | cna | hetloss | BASIS    |
| PD13297      | RPS26 | cna | hetloss | BASIS    |
| PD13771      | RPS26 | cna | gain    | BASIS    |
| PD24186      | RPS26 | cna | gain    | BASIS    |
| PD24202      | RPS26 | cna | hetloss | BASIS    |
| PD24206      | RPS26 | cna | gain    | BASIS    |
| PD24337      | RPS26 | cna | hetloss | BASIS    |
| PD3890       | RPS26 | cna | hetloss | BASIS    |
| PD3905       | RPS26 | cna | gain    | BASIS    |
| PD4826       | RPS26 | cna | gain    | BASIS    |
| PD5945       | RPS26 | cna | gain    | BASIS    |
| PD5948       | RPS26 | cna | gain    | BASIS    |
| PD6406       | RPS26 | cna | hetloss | BASIS    |
| PD6413       | RPS26 | cna | hetloss | BASIS    |
| PD6731       | RPS26 | cna | hetloss | BASIS    |
| PD7067       | RPS26 | cna | gain    | BASIS    |
| PD8621       | RPS26 | cna | hetloss | BASIS    |
| PD9585       | RPS26 | cna | hetloss | BASIS    |
| PD9702       | RPS26 | cna | gain    | BASIS    |
| TCGA-AO-A0JL | S1PR2 | cna | gain    | TCGA     |
| TCGA-BH-A0C0 | S1PR2 | cna | gain    | TCGA     |
| TCGA-BH-A1FU | S1PR2 | cna | hetloss | TCGA     |

|              |       |     |         |          |
|--------------|-------|-----|---------|----------|
| TCGA-C8-A12L | S1PR2 | cna | gain    | TCGA     |
| TCGA-D8-A27M | S1PR2 | cna | hetloss | TCGA     |
| TCGA-EW-A10X | S1PR2 | cna | hetloss | TCGA     |
| TCGA-LL-A5YP | S1PR2 | cna | hetloss | TCGA     |
| MB-0346      | S1PR2 | cna | hetloss | METABRIC |
| MB-2827      | S1PR2 | cna | hetloss | METABRIC |
| MB-5070      | S1PR2 | cna | hetloss | METABRIC |
| MB-5465      | S1PR2 | cna | gain    | METABRIC |
| MB-6098      | S1PR2 | cna | hetloss | METABRIC |
| MB-7038      | S1PR2 | cna | hetloss | METABRIC |
| MB-0420      | S1PR2 | cna | hetloss | METABRIC |
| PD11327      | S1PR2 | cna | homdel  | BASIS    |
| PD13771      | S1PR2 | cna | gain    | BASIS    |
| PD14442      | S1PR2 | cna | hetloss | BASIS    |
| PD23562      | S1PR2 | cna | gain    | BASIS    |
| PD23574      | S1PR2 | cna | gain    | BASIS    |
| PD24206      | S1PR2 | cna | homdel  | BASIS    |
| PD3905       | S1PR2 | cna | gain    | BASIS    |
| PD4006       | S1PR2 | cna | gain    | BASIS    |
| PD4107       | S1PR2 | cna | gain    | BASIS    |
| PD4826       | S1PR2 | cna | gain    | BASIS    |
| PD4967       | S1PR2 | cna | hetloss | BASIS    |
| PD5930       | S1PR2 | cna | gain    | BASIS    |
| PD5935       | S1PR2 | cna | gain    | BASIS    |
| PD5945       | S1PR2 | cna | amp     | BASIS    |
| PD5948       | S1PR2 | cna | gain    | BASIS    |
| PD6406       | S1PR2 | cna | amp     | BASIS    |
| PD7067       | S1PR2 | cna | gain    | BASIS    |
| PD7215       | S1PR2 | cna | amp     | BASIS    |
| PD8621       | S1PR2 | cna | gain    | BASIS    |
| PD9702       | S1PR2 | cna | gain    | BASIS    |
| TCGA-A2-A25B | SDC4  | cna | gain    | TCGA     |
| TCGA-AO-A0JL | SDC4  | cna | gain    | TCGA     |
| TCGA-BH-A0AW | SDC4  | cna | gain    | TCGA     |
| TCGA-BH-A0C0 | SDC4  | cna | gain    | TCGA     |
| TCGA-C8-A12L | SDC4  | cna | gain    | TCGA     |
| TCGA-D8-A27M | SDC4  | cna | gain    | TCGA     |
| TCGA-E2-A1L7 | SDC4  | cna | gain    | TCGA     |
| TCGA-E9-A1NC | SDC4  | cna | hetloss | TCGA     |
| TCGA-LL-A5YP | SDC4  | cna | hetloss | TCGA     |
| MB-0346      | SDC4  | cna | gain    | METABRIC |
| MB-5107      | SDC4  | cna | gain    | METABRIC |
| MB-6060      | SDC4  | cna | amp     | METABRIC |
| MB-6098      | SDC4  | cna | hetloss | METABRIC |
| PD11327      | SDC4  | cna | homdel  | BASIS    |
| PD13297      | SDC4  | cna | hetloss | BASIS    |
| PD13299      | SDC4  | cna | gain    | BASIS    |

|              |       |     |         |          |
|--------------|-------|-----|---------|----------|
| PD13771      | SDC4  | cna | gain    | BASIS    |
| PD22355      | SDC4  | cna | hetloss | BASIS    |
| PD24186      | SDC4  | cna | gain    | BASIS    |
| PD24202      | SDC4  | cna | hetloss | BASIS    |
| PD3905       | SDC4  | cna | gain    | BASIS    |
| PD4005       | SDC4  | cna | hetloss | BASIS    |
| PD4006       | SDC4  | cna | gain    | BASIS    |
| PD4107       | SDC4  | cna | gain    | BASIS    |
| PD4826       | SDC4  | cna | gain    | BASIS    |
| PD5935       | SDC4  | cna | gain    | BASIS    |
| PD5945       | SDC4  | cna | amp     | BASIS    |
| PD5948       | SDC4  | cna | gain    | BASIS    |
| PD6731       | SDC4  | cna | hetloss | BASIS    |
| PD7067       | SDC4  | cna | gain    | BASIS    |
| PD7215       | SDC4  | cna | amp     | BASIS    |
| PD8980       | SDC4  | cna | gain    | BASIS    |
| PD9004       | SDC4  | cna | gain    | BASIS    |
| PD9585       | SDC4  | cna | hetloss | BASIS    |
| TCGA-A2-A25B | SEMG1 | cna | gain    | TCGA     |
| TCGA-AO-A0JL | SEMG1 | cna | gain    | TCGA     |
| TCGA-BH-A0AW | SEMG1 | cna | gain    | TCGA     |
| TCGA-BH-A0C0 | SEMG1 | cna | gain    | TCGA     |
| TCGA-C8-A12L | SEMG1 | cna | gain    | TCGA     |
| TCGA-D8-A27M | SEMG1 | cna | gain    | TCGA     |
| TCGA-E2-A1L7 | SEMG1 | cna | gain    | TCGA     |
| TCGA-E9-A1NC | SEMG1 | cna | hetloss | TCGA     |
| TCGA-LL-A5YP | SEMG1 | cna | hetloss | TCGA     |
| MB-0346      | SEMG1 | cna | gain    | METABRIC |
| MB-5107      | SEMG1 | cna | gain    | METABRIC |
| MB-6060      | SEMG1 | cna | amp     | METABRIC |
| MB-6098      | SEMG1 | cna | hetloss | METABRIC |
| PD11327      | SEMG1 | cna | homdel  | BASIS    |
| PD13297      | SEMG1 | cna | hetloss | BASIS    |
| PD13299      | SEMG1 | cna | gain    | BASIS    |
| PD13771      | SEMG1 | cna | gain    | BASIS    |
| PD22355      | SEMG1 | cna | hetloss | BASIS    |
| PD24186      | SEMG1 | cna | gain    | BASIS    |
| PD24202      | SEMG1 | cna | hetloss | BASIS    |
| PD3905       | SEMG1 | cna | gain    | BASIS    |
| PD4005       | SEMG1 | cna | hetloss | BASIS    |
| PD4006       | SEMG1 | cna | gain    | BASIS    |
| PD4107       | SEMG1 | cna | gain    | BASIS    |
| PD4826       | SEMG1 | cna | gain    | BASIS    |
| PD5935       | SEMG1 | cna | gain    | BASIS    |
| PD5945       | SEMG1 | cna | amp     | BASIS    |
| PD5948       | SEMG1 | cna | gain    | BASIS    |
| PD6731       | SEMG1 | cna | hetloss | BASIS    |

|                   |       |     |         |            |
|-------------------|-------|-----|---------|------------|
| PD7067            | SEMG1 | cna | gain    | BASIS      |
| PD7215            | SEMG1 | cna | amp     | BASIS      |
| PD8980            | SEMG1 | cna | gain    | BASIS      |
| PD9004            | SEMG1 | cna | gain    | BASIS      |
| PD9585            | SEMG1 | cna | hetloss | BASIS      |
| TCGA-AN-A0XU      | SETD2 | cna | hetloss | TCGA       |
| TCGA-BH-A0C0      | SETD2 | cna | hetloss | TCGA       |
| TCGA-BH-A1FU      | SETD2 | cna | hetloss | TCGA       |
| TCGA-C8-A12L      | SETD2 | cna | hetloss | TCGA       |
| TCGA-D8-A27M      | SETD2 | cna | hetloss | TCGA       |
| TCGA-E9-A1NC      | SETD2 | cna | hetloss | TCGA       |
| TCGA-LL-A5YP      | SETD2 | cna | hetloss | TCGA       |
| MB-2827           | SETD2 | cna | hetloss | METABRIC   |
| MB-5107           | SETD2 | cna | hetloss | METABRIC   |
| MB-7038           | SETD2 | cna | hetloss | METABRIC   |
| MB-7048           | SETD2 | cna | hetloss | METABRIC   |
| MB-0420           | SETD2 | cna | hetloss | METABRIC   |
| P-0009557-T01-IM5 | SETD2 | cna | homdel  | MSK-IMPACT |
| PD10014           | SETD2 | cna | hetloss | BASIS      |
| PD11327           | SETD2 | cna | homdel  | BASIS      |
| PD13296           | SETD2 | cna | homdel  | BASIS      |
| PD13297           | SETD2 | cna | hetloss | BASIS      |
| PD13299           | SETD2 | cna | gain    | BASIS      |
| PD22355           | SETD2 | cna | hetloss | BASIS      |
| PD23561           | SETD2 | cna | hetloss | BASIS      |
| PD23578           | SETD2 | cna | hetloss | BASIS      |
| PD24202           | SETD2 | cna | hetloss | BASIS      |
| PD24206           | SETD2 | cna | gain    | BASIS      |
| PD24337           | SETD2 | cna | hetloss | BASIS      |
| PD3890            | SETD2 | cna | hetloss | BASIS      |
| PD3905            | SETD2 | cna | gain    | BASIS      |
| PD4005            | SETD2 | cna | hetloss | BASIS      |
| PD4826            | SETD2 | cna | gain    | BASIS      |
| PD5945            | SETD2 | cna | gain    | BASIS      |
| PD6406            | SETD2 | cna | hetloss | BASIS      |
| PD6413            | SETD2 | cna | hetloss | BASIS      |
| PD6731            | SETD2 | cna | hetloss | BASIS      |
| PD7067            | SETD2 | cna | gain    | BASIS      |
| PD9585            | SETD2 | cna | hetloss | BASIS      |
| TCGA-AN-A0XU      | SHQ1  | cna | hetloss | TCGA       |
| TCGA-BH-A0C0      | SHQ1  | cna | hetloss | TCGA       |
| TCGA-BH-A18R      | SHQ1  | cna | homdel  | TCGA       |
| TCGA-BH-A1FU      | SHQ1  | cna | hetloss | TCGA       |
| TCGA-C8-A12L      | SHQ1  | cna | gain    | TCGA       |
| TCGA-D8-A27M      | SHQ1  | cna | hetloss | TCGA       |
| TCGA-E2-A1L7      | SHQ1  | cna | homdel  | TCGA       |
| TCGA-E9-A1NC      | SHQ1  | cna | hetloss | TCGA       |

|              |       |     |         |          |
|--------------|-------|-----|---------|----------|
| TCGA-LL-A5YP | SHQ1  | cna | gain    | TCGA     |
| MB-0346      | SHQ1  | cna | hetloss | METABRIC |
| MB-2827      | SHQ1  | cna | hetloss | METABRIC |
| MB-5465      | SHQ1  | cna | hetloss | METABRIC |
| MB-6098      | SHQ1  | cna | hetloss | METABRIC |
| MB-7048      | SHQ1  | cna | hetloss | METABRIC |
| MB-0420      | SHQ1  | cna | hetloss | METABRIC |
| MTS-T0064    | SHQ1  | cna | gain    | METABRIC |
| PD10014      | SHQ1  | cna | hetloss | BASIS    |
| PD11327      | SHQ1  | cna | homdel  | BASIS    |
| PD11742      | SHQ1  | cna | hetloss | BASIS    |
| PD13296      | SHQ1  | cna | hetloss | BASIS    |
| PD13299      | SHQ1  | cna | gain    | BASIS    |
| PD13771      | SHQ1  | cna | hetloss | BASIS    |
| PD23561      | SHQ1  | cna | hetloss | BASIS    |
| PD23574      | SHQ1  | cna | gain    | BASIS    |
| PD23578      | SHQ1  | cna | hetloss | BASIS    |
| PD24202      | SHQ1  | cna | hetloss | BASIS    |
| PD24206      | SHQ1  | cna | hetloss | BASIS    |
| PD24337      | SHQ1  | cna | hetloss | BASIS    |
| PD4107       | SHQ1  | cna | gain    | BASIS    |
| PD5945       | SHQ1  | cna | gain    | BASIS    |
| PD6406       | SHQ1  | cna | hetloss | BASIS    |
| PD6731       | SHQ1  | cna | hetloss | BASIS    |
| PD7067       | SHQ1  | cna | gain    | BASIS    |
| PD9585       | SHQ1  | cna | hetloss | BASIS    |
| TCGA-A2-A25B | SMAD2 | cna | hetloss | TCGA     |
| TCGA-AN-A0XU | SMAD2 | cna | hetloss | TCGA     |
| TCGA-AO-A0JL | SMAD2 | cna | gain    | TCGA     |
| TCGA-BH-A0AW | SMAD2 | cna | hetloss | TCGA     |
| TCGA-BH-A0C0 | SMAD2 | cna | gain    | TCGA     |
| TCGA-C8-A12L | SMAD2 | cna | gain    | TCGA     |
| TCGA-D8-A27M | SMAD2 | cna | hetloss | TCGA     |
| TCGA-E2-A1L7 | SMAD2 | cna | gain    | TCGA     |
| TCGA-LL-A5YP | SMAD2 | cna | hetloss | TCGA     |
| MB-0346      | SMAD2 | cna | hetloss | METABRIC |
| MB-0420      | SMAD2 | cna | hetloss | METABRIC |
| PD10014      | SMAD2 | cna | hetloss | BASIS    |
| PD11327      | SMAD2 | cna | gain    | BASIS    |
| PD11742      | SMAD2 | cna | hetloss | BASIS    |
| PD13296      | SMAD2 | cna | hetloss | BASIS    |
| PD13297      | SMAD2 | cna | gain    | BASIS    |
| PD13299      | SMAD2 | cna | gain    | BASIS    |
| PD23574      | SMAD2 | cna | hetloss | BASIS    |
| PD24186      | SMAD2 | cna | gain    | BASIS    |
| PD24202      | SMAD2 | cna | hetloss | BASIS    |
| PD24337      | SMAD2 | cna | gain    | BASIS    |

|              |       |     |         |          |
|--------------|-------|-----|---------|----------|
| PD3905       | SMAD2 | cna | gain    | BASIS    |
| PD4006       | SMAD2 | cna | gain    | BASIS    |
| PD4107       | SMAD2 | cna | gain    | BASIS    |
| PD4826       | SMAD2 | cna | gain    | BASIS    |
| PD4967       | SMAD2 | cna | hetloss | BASIS    |
| PD5930       | SMAD2 | cna | gain    | BASIS    |
| PD5945       | SMAD2 | cna | gain    | BASIS    |
| PD5948       | SMAD2 | cna | hetloss | BASIS    |
| PD6406       | SMAD2 | cna | gain    | BASIS    |
| PD7215       | SMAD2 | cna | gain    | BASIS    |
| PD8980       | SMAD2 | cna | hetloss | BASIS    |
| PD9004       | SMAD2 | cna | hetloss | BASIS    |
| PD9702       | SMAD2 | cna | gain    | BASIS    |
| TCGA-AN-A0XU | SNX29 | cna | gain    | TCGA     |
| TCGA-AO-A0JL | SNX29 | cna | gain    | TCGA     |
| TCGA-BH-A0AW | SNX29 | cna | gain    | TCGA     |
| TCGA-BH-A0C0 | SNX29 | cna | gain    | TCGA     |
| TCGA-C8-A12L | SNX29 | cna | gain    | TCGA     |
| TCGA-E2-A1L7 | SNX29 | cna | hetloss | TCGA     |
| TCGA-LL-A5YP | SNX29 | cna | gain    | TCGA     |
| MB-0346      | SNX29 | cna | gain    | METABRIC |
| MB-6060      | SNX29 | cna | gain    | METABRIC |
| MB-6098      | SNX29 | cna | hetloss | METABRIC |
| MB-6271      | SNX29 | cna | gain    | METABRIC |
| MB-7032      | SNX29 | cna | gain    | METABRIC |
| MB-7038      | SNX29 | cna | hetloss | METABRIC |
| MB-0420      | SNX29 | cna | hetloss | METABRIC |
| PD10014      | SNX29 | cna | hetloss | BASIS    |
| PD11327      | SNX29 | cna | hetloss | BASIS    |
| PD11742      | SNX29 | cna | gain    | BASIS    |
| PD13296      | SNX29 | cna | gain    | BASIS    |
| PD13297      | SNX29 | cna | hetloss | BASIS    |
| PD13299      | SNX29 | cna | gain    | BASIS    |
| PD22355      | SNX29 | cna | homdel  | BASIS    |
| PD24202      | SNX29 | cna | hetloss | BASIS    |
| PD24206      | SNX29 | cna | gain    | BASIS    |
| PD3905       | SNX29 | cna | gain    | BASIS    |
| PD4005       | SNX29 | cna | gain    | BASIS    |
| PD4107       | SNX29 | cna | gain    | BASIS    |
| PD4826       | SNX29 | cna | gain    | BASIS    |
| PD5935       | SNX29 | cna | gain    | BASIS    |
| PD5945       | SNX29 | cna | gain    | BASIS    |
| PD5948       | SNX29 | cna | gain    | BASIS    |
| PD7067       | SNX29 | cna | gain    | BASIS    |
| PD7215       | SNX29 | cna | amp     | BASIS    |
| PD9004       | SNX29 | cna | gain    | BASIS    |
| PD9585       | SNX29 | cna | hetloss | BASIS    |



|              |       |     |         |          |
|--------------|-------|-----|---------|----------|
| TCGA-A2-A25B | SOCS2 | cna | gain    | TCGA     |
| TCGA-AO-A0JL | SOCS2 | cna | hetloss | TCGA     |
| TCGA-BH-A0C0 | SOCS2 | cna | hetloss | TCGA     |
| TCGA-BH-A18R | SOCS2 | cna | gain    | TCGA     |
| TCGA-BH-A1FU | SOCS2 | cna | hetloss | TCGA     |
| TCGA-C8-A12L | SOCS2 | cna | gain    | TCGA     |
| TCGA-E2-A1L7 | SOCS2 | cna | hetloss | TCGA     |
| TCGA-LL-A5YP | SOCS2 | cna | hetloss | TCGA     |
| MB-0346      | SOCS2 | cna | gain    | METABRIC |
| MB-2827      | SOCS2 | cna | hetloss | METABRIC |
| MB-5070      | SOCS2 | cna | hetloss | METABRIC |
| MB-5107      | SOCS2 | cna | gain    | METABRIC |
| MB-5465      | SOCS2 | cna | gain    | METABRIC |
| MB-6098      | SOCS2 | cna | hetloss | METABRIC |
| PD10014      | SOCS2 | cna | gain    | BASIS    |
| PD11327      | SOCS2 | cna | homdel  | BASIS    |
| PD13296      | SOCS2 | cna | hetloss | BASIS    |
| PD22355      | SOCS2 | cna | hetloss | BASIS    |
| PD23574      | SOCS2 | cna | hetloss | BASIS    |
| PD24337      | SOCS2 | cna | gain    | BASIS    |
| PD3890       | SOCS2 | cna | hetloss | BASIS    |
| PD4005       | SOCS2 | cna | hetloss | BASIS    |
| PD4006       | SOCS2 | cna | gain    | BASIS    |
| PD4107       | SOCS2 | cna | gain    | BASIS    |
| PD4826       | SOCS2 | cna | gain    | BASIS    |
| PD5945       | SOCS2 | cna | gain    | BASIS    |
| PD6406       | SOCS2 | cna | hetloss | BASIS    |
| PD6413       | SOCS2 | cna | hetloss | BASIS    |
| PD6731       | SOCS2 | cna | hetloss | BASIS    |
| PD7067       | SOCS2 | cna | gain    | BASIS    |
| PD7215       | SOCS2 | cna | hetloss | BASIS    |
| PD8621       | SOCS2 | cna | hetloss | BASIS    |
| PD8980       | SOCS2 | cna | hetloss | BASIS    |
| PD9585       | SOCS2 | cna | hetloss | BASIS    |
| TCGA-A2-A25B | SOX4  | cna | gain    | TCGA     |
| TCGA-AN-A0XU | SOX4  | cna | amp     | TCGA     |
| TCGA-AO-A0JL | SOX4  | cna | gain    | TCGA     |
| TCGA-BH-A0AW | SOX4  | cna | gain    | TCGA     |
| TCGA-BH-A0C0 | SOX4  | cna | hetloss | TCGA     |
| TCGA-BH-A18R | SOX4  | cna | homdel  | TCGA     |
| TCGA-C8-A12L | SOX4  | cna | hetloss | TCGA     |
| TCGA-E2-A1L7 | SOX4  | cna | gain    | TCGA     |
| MB-5070      | SOX4  | cna | amp     | METABRIC |
| MB-5465      | SOX4  | cna | gain    | METABRIC |
| MB-6060      | SOX4  | cna | gain    | METABRIC |
| MB-7032      | SOX4  | cna | gain    | METABRIC |
| PD11327      | SOX4  | cna | amp     | BASIS    |

|              |       |     |         |          |
|--------------|-------|-----|---------|----------|
| PD13296      | SOX4  | cna | gain    | BASIS    |
| PD13299      | SOX4  | cna | amp     | BASIS    |
| PD22355      | SOX4  | cna | gain    | BASIS    |
| PD23562      | SOX4  | cna | gain    | BASIS    |
| PD23574      | SOX4  | cna | gain    | BASIS    |
| PD24186      | SOX4  | cna | amp     | BASIS    |
| PD24202      | SOX4  | cna | gain    | BASIS    |
| PD24206      | SOX4  | cna | gain    | BASIS    |
| PD3905       | SOX4  | cna | amp     | BASIS    |
| PD4005       | SOX4  | cna | gain    | BASIS    |
| PD4006       | SOX4  | cna | gain    | BASIS    |
| PD4107       | SOX4  | cna | gain    | BASIS    |
| PD4826       | SOX4  | cna | gain    | BASIS    |
| PD5935       | SOX4  | cna | gain    | BASIS    |
| PD5945       | SOX4  | cna | amp     | BASIS    |
| PD5948       | SOX4  | cna | amp     | BASIS    |
| PD6731       | SOX4  | cna | hetloss | BASIS    |
| PD7067       | SOX4  | cna | amp     | BASIS    |
| PD7215       | SOX4  | cna | gain    | BASIS    |
| PD8621       | SOX4  | cna | amp     | BASIS    |
| PD9702       | SOX4  | cna | gain    | BASIS    |
| TCGA-AN-A0XU | STAT4 | cna | gain    | TCGA     |
| TCGA-AO-A0JL | STAT4 | cna | gain    | TCGA     |
| TCGA-BH-A0AW | STAT4 | cna | gain    | TCGA     |
| TCGA-C8-A12L | STAT4 | cna | gain    | TCGA     |
| TCGA-D8-A27M | STAT4 | cna | gain    | TCGA     |
| TCGA-LL-A5YP | STAT4 | cna | gain    | TCGA     |
| MB-2827      | STAT4 | cna | hetloss | METABRIC |
| MB-5465      | STAT4 | cna | hetloss | METABRIC |
| MB-6060      | STAT4 | cna | gain    | METABRIC |
| MB-6098      | STAT4 | cna | hetloss | METABRIC |
| MB-6271      | STAT4 | cna | hetloss | METABRIC |
| MB-7032      | STAT4 | cna | gain    | METABRIC |
| MB-0420      | STAT4 | cna | gain    | METABRIC |
| PD10014      | STAT4 | cna | gain    | BASIS    |
| PD11327      | STAT4 | cna | gain    | BASIS    |
| PD13297      | STAT4 | cna | hetloss | BASIS    |
| PD13299      | STAT4 | cna | gain    | BASIS    |
| PD22355      | STAT4 | cna | hetloss | BASIS    |
| PD23578      | STAT4 | cna | gain    | BASIS    |
| PD24186      | STAT4 | cna | gain    | BASIS    |
| PD24206      | STAT4 | cna | gain    | BASIS    |
| PD3890       | STAT4 | cna | hetloss | BASIS    |
| PD3905       | STAT4 | cna | gain    | BASIS    |
| PD4107       | STAT4 | cna | gain    | BASIS    |
| PD4967       | STAT4 | cna | hetloss | BASIS    |
| PD5935       | STAT4 | cna | gain    | BASIS    |

|              |       |     |         |          |
|--------------|-------|-----|---------|----------|
| PD5945       | STAT4 | cna | amp     | BASIS    |
| PD5948       | STAT4 | cna | gain    | BASIS    |
| PD6413       | STAT4 | cna | hetloss | BASIS    |
| PD7067       | STAT4 | cna | amp     | BASIS    |
| PD7215       | STAT4 | cna | gain    | BASIS    |
| PD9004       | STAT4 | cna | gain    | BASIS    |
| PD9585       | STAT4 | cna | hetloss | BASIS    |
| PD9702       | STAT4 | cna | gain    | BASIS    |
| TCGA-A2-A25B | TAL2  | cna | gain    | TCGA     |
| TCGA-AN-A0XU | TAL2  | cna | hetloss | TCGA     |
| TCGA-AO-A0JL | TAL2  | cna | hetloss | TCGA     |
| TCGA-BH-A1FU | TAL2  | cna | hetloss | TCGA     |
| TCGA-C8-A12L | TAL2  | cna | hetloss | TCGA     |
| TCGA-E2-A1L7 | TAL2  | cna | hetloss | TCGA     |
| TCGA-E9-A1NC | TAL2  | cna | hetloss | TCGA     |
| TCGA-LL-A5YP | TAL2  | cna | hetloss | TCGA     |
| MB-0346      | TAL2  | cna | hetloss | METABRIC |
| MB-2827      | TAL2  | cna | hetloss | METABRIC |
| MB-5070      | TAL2  | cna | hetloss | METABRIC |
| MB-5107      | TAL2  | cna | hetloss | METABRIC |
| MB-6098      | TAL2  | cna | hetloss | METABRIC |
| MB-7038      | TAL2  | cna | hetloss | METABRIC |
| MB-0420      | TAL2  | cna | hetloss | METABRIC |
| PD11327      | TAL2  | cna | gain    | BASIS    |
| PD13296      | TAL2  | cna | hetloss | BASIS    |
| PD23562      | TAL2  | cna | gain    | BASIS    |
| PD23578      | TAL2  | cna | hetloss | BASIS    |
| PD24186      | TAL2  | cna | amp     | BASIS    |
| PD24202      | TAL2  | cna | hetloss | BASIS    |
| PD24206      | TAL2  | cna | gain    | BASIS    |
| PD3905       | TAL2  | cna | gain    | BASIS    |
| PD4005       | TAL2  | cna | hetloss | BASIS    |
| PD4006       | TAL2  | cna | gain    | BASIS    |
| PD4107       | TAL2  | cna | hetloss | BASIS    |
| PD5945       | TAL2  | cna | amp     | BASIS    |
| PD6406       | TAL2  | cna | hetloss | BASIS    |
| PD6731       | TAL2  | cna | hetloss | BASIS    |
| PD7215       | TAL2  | cna | gain    | BASIS    |
| PD8621       | TAL2  | cna | gain    | BASIS    |
| PD8980       | TAL2  | cna | gain    | BASIS    |
| PD9004       | TAL2  | cna | gain    | BASIS    |
| PD9585       | TAL2  | cna | hetloss | BASIS    |
| TCGA-A2-A25B | TBK1  | cna | gain    | TCGA     |
| TCGA-AO-A0JL | TBK1  | cna | hetloss | TCGA     |
| TCGA-BH-A18R | TBK1  | cna | gain    | TCGA     |
| TCGA-BH-A1FU | TBK1  | cna | hetloss | TCGA     |
| TCGA-C8-A12L | TBK1  | cna | gain    | TCGA     |

|              |        |     |         |          |
|--------------|--------|-----|---------|----------|
| TCGA-E2-A1L7 | TBK1   | cna | hetloss | TCGA     |
| TCGA-LL-A5YP | TBK1   | cna | hetloss | TCGA     |
| MB-0346      | TBK1   | cna | gain    | METABRIC |
| MB-2827      | TBK1   | cna | hetloss | METABRIC |
| MB-5107      | TBK1   | cna | gain    | METABRIC |
| MB-6060      | TBK1   | cna | gain    | METABRIC |
| MB-6098      | TBK1   | cna | gain    | METABRIC |
| MB-0420      | TBK1   | cna | hetloss | METABRIC |
| MTS-T0064    | TBK1   | cna | gain    | METABRIC |
| PD10014      | TBK1   | cna | gain    | BASIS    |
| PD11327      | TBK1   | cna | homdel  | BASIS    |
| PD22355      | TBK1   | cna | hetloss | BASIS    |
| PD23578      | TBK1   | cna | gain    | BASIS    |
| PD24186      | TBK1   | cna | gain    | BASIS    |
| PD24202      | TBK1   | cna | hetloss | BASIS    |
| PD24206      | TBK1   | cna | gain    | BASIS    |
| PD24337      | TBK1   | cna | gain    | BASIS    |
| PD3890       | TBK1   | cna | hetloss | BASIS    |
| PD3905       | TBK1   | cna | gain    | BASIS    |
| PD4107       | TBK1   | cna | gain    | BASIS    |
| PD4826       | TBK1   | cna | gain    | BASIS    |
| PD5945       | TBK1   | cna | gain    | BASIS    |
| PD6406       | TBK1   | cna | hetloss | BASIS    |
| PD6413       | TBK1   | cna | hetloss | BASIS    |
| PD6731       | TBK1   | cna | hetloss | BASIS    |
| PD7067       | TBK1   | cna | gain    | BASIS    |
| PD8621       | TBK1   | cna | hetloss | BASIS    |
| PD9585       | TBK1   | cna | hetloss | BASIS    |
| PD9702       | TBK1   | cna | gain    | BASIS    |
| TCGA-A2-A25B | TGFBR1 | cna | gain    | TCGA     |
| TCGA-AN-A0XU | TGFBR1 | cna | hetloss | TCGA     |
| TCGA-AO-A0JL | TGFBR1 | cna | hetloss | TCGA     |
| TCGA-BH-A1FU | TGFBR1 | cna | hetloss | TCGA     |
| TCGA-C8-A12L | TGFBR1 | cna | hetloss | TCGA     |
| TCGA-E2-A1L7 | TGFBR1 | cna | hetloss | TCGA     |
| TCGA-E9-A1NC | TGFBR1 | cna | hetloss | TCGA     |
| TCGA-LL-A5YP | TGFBR1 | cna | hetloss | TCGA     |
| MB-0346      | TGFBR1 | cna | hetloss | METABRIC |
| MB-2827      | TGFBR1 | cna | hetloss | METABRIC |
| MB-5070      | TGFBR1 | cna | hetloss | METABRIC |
| MB-5107      | TGFBR1 | cna | hetloss | METABRIC |
| MB-6098      | TGFBR1 | cna | hetloss | METABRIC |
| MB-7038      | TGFBR1 | cna | hetloss | METABRIC |
| MB-0420      | TGFBR1 | cna | hetloss | METABRIC |
| PD11327      | TGFBR1 | cna | gain    | BASIS    |
| PD23562      | TGFBR1 | cna | gain    | BASIS    |
| PD23578      | TGFBR1 | cna | hetloss | BASIS    |

|              |        |     |         |          |
|--------------|--------|-----|---------|----------|
| PD24186      | TGFBR1 | cna | amp     | BASIS    |
| PD24202      | TGFBR1 | cna | hetloss | BASIS    |
| PD24206      | TGFBR1 | cna | gain    | BASIS    |
| PD3905       | TGFBR1 | cna | gain    | BASIS    |
| PD4005       | TGFBR1 | cna | gain    | BASIS    |
| PD4006       | TGFBR1 | cna | gain    | BASIS    |
| PD4107       | TGFBR1 | cna | hetloss | BASIS    |
| PD5945       | TGFBR1 | cna | amp     | BASIS    |
| PD6406       | TGFBR1 | cna | hetloss | BASIS    |
| PD6731       | TGFBR1 | cna | hetloss | BASIS    |
| PD7067       | TGFBR1 | cna | gain    | BASIS    |
| PD7215       | TGFBR1 | cna | gain    | BASIS    |
| PD8621       | TGFBR1 | cna | gain    | BASIS    |
| PD8980       | TGFBR1 | cna | gain    | BASIS    |
| PD9004       | TGFBR1 | cna | gain    | BASIS    |
| PD9585       | TGFBR1 | cna | hetloss | BASIS    |
| TCGA-AN-A0XU | TGFBR2 | cna | hetloss | TCGA     |
| TCGA-BH-A0C0 | TGFBR2 | cna | hetloss | TCGA     |
| TCGA-BH-A18R | TGFBR2 | cna | gain    | TCGA     |
| TCGA-BH-A1FU | TGFBR2 | cna | hetloss | TCGA     |
| TCGA-C8-A12L | TGFBR2 | cna | hetloss | TCGA     |
| TCGA-D8-A27M | TGFBR2 | cna | hetloss | TCGA     |
| TCGA-E9-A1NC | TGFBR2 | cna | hetloss | TCGA     |
| TCGA-LL-A5YP | TGFBR2 | cna | amp     | TCGA     |
| MB-2827      | TGFBR2 | cna | hetloss | METABRIC |
| MB-7038      | TGFBR2 | cna | hetloss | METABRIC |
| MB-7048      | TGFBR2 | cna | hetloss | METABRIC |
| MB-0420      | TGFBR2 | cna | hetloss | METABRIC |
| PD10014      | TGFBR2 | cna | hetloss | BASIS    |
| PD11327      | TGFBR2 | cna | gain    | BASIS    |
| PD11742      | TGFBR2 | cna | gain    | BASIS    |
| PD13296      | TGFBR2 | cna | gain    | BASIS    |
| PD13297      | TGFBR2 | cna | hetloss | BASIS    |
| PD13299      | TGFBR2 | cna | hetloss | BASIS    |
| PD13771      | TGFBR2 | cna | gain    | BASIS    |
| PD22355      | TGFBR2 | cna | hetloss | BASIS    |
| PD23561      | TGFBR2 | cna | hetloss | BASIS    |
| PD23574      | TGFBR2 | cna | gain    | BASIS    |
| PD24202      | TGFBR2 | cna | hetloss | BASIS    |
| PD24206      | TGFBR2 | cna | gain    | BASIS    |
| PD24337      | TGFBR2 | cna | hetloss | BASIS    |
| PD3905       | TGFBR2 | cna | gain    | BASIS    |
| PD4006       | TGFBR2 | cna | hetloss | BASIS    |
| PD4107       | TGFBR2 | cna | hetloss | BASIS    |
| PD4826       | TGFBR2 | cna | gain    | BASIS    |
| PD5945       | TGFBR2 | cna | gain    | BASIS    |
| PD6406       | TGFBR2 | cna | hetloss | BASIS    |

|              |         |     |         |          |
|--------------|---------|-----|---------|----------|
| PD6731       | TGFBR2  | cna | hetloss | BASIS    |
| PD8980       | TGFBR2  | cna | gain    | BASIS    |
| PD9585       | TGFBR2  | cna | hetloss | BASIS    |
| TCGA-A2-A25B | TMEM30A | cna | gain    | TCGA     |
| TCGA-AO-A0JL | TMEM30A | cna | hetloss | TCGA     |
| TCGA-BH-A0C0 | TMEM30A | cna | gain    | TCGA     |
| TCGA-C8-A12L | TMEM30A | cna | gain    | TCGA     |
| MB-0346      | TMEM30A | cna | hetloss | METABRIC |
| MB-5070      | TMEM30A | cna | hetloss | METABRIC |
| MB-5107      | TMEM30A | cna | hetloss | METABRIC |
| MB-6098      | TMEM30A | cna | hetloss | METABRIC |
| MB-7032      | TMEM30A | cna | hetloss | METABRIC |
| MB-7038      | TMEM30A | cna | amp     | METABRIC |
| MB-7048      | TMEM30A | cna | hetloss | METABRIC |
| MB-0420      | TMEM30A | cna | gain    | METABRIC |
| PD11327      | TMEM30A | cna | gain    | BASIS    |
| PD13299      | TMEM30A | cna | gain    | BASIS    |
| PD13771      | TMEM30A | cna | hetloss | BASIS    |
| PD23562      | TMEM30A | cna | gain    | BASIS    |
| PD23574      | TMEM30A | cna | gain    | BASIS    |
| PD24186      | TMEM30A | cna | gain    | BASIS    |
| PD24206      | TMEM30A | cna | gain    | BASIS    |
| PD24337      | TMEM30A | cna | hetloss | BASIS    |
| PD3905       | TMEM30A | cna | gain    | BASIS    |
| PD4006       | TMEM30A | cna | gain    | BASIS    |
| PD5930       | TMEM30A | cna | hetloss | BASIS    |
| PD5935       | TMEM30A | cna | amp     | BASIS    |
| PD5945       | TMEM30A | cna | amp     | BASIS    |
| PD5948       | TMEM30A | cna | gain    | BASIS    |
| PD6731       | TMEM30A | cna | hetloss | BASIS    |
| PD7067       | TMEM30A | cna | gain    | BASIS    |
| PD7215       | TMEM30A | cna | gain    | BASIS    |
| PD8621       | TMEM30A | cna | gain    | BASIS    |
| PD8980       | TMEM30A | cna | hetloss | BASIS    |
| PD9004       | TMEM30A | cna | gain    | BASIS    |
| PD9585       | TMEM30A | cna | hetloss | BASIS    |
| PD9702       | TMEM30A | cna | gain    | BASIS    |
| TCGA-AO-A0JL | TNFAIP6 | cna | gain    | TCGA     |
| TCGA-D8-A27M | TNFAIP6 | cna | gain    | TCGA     |
| TCGA-E9-A1NC | TNFAIP6 | cna | gain    | TCGA     |
| TCGA-LL-A5YP | TNFAIP6 | cna | gain    | TCGA     |
| MB-2827      | TNFAIP6 | cna | hetloss | METABRIC |
| MB-5107      | TNFAIP6 | cna | hetloss | METABRIC |
| MB-6098      | TNFAIP6 | cna | hetloss | METABRIC |
| MB-6271      | TNFAIP6 | cna | hetloss | METABRIC |
| MB-7032      | TNFAIP6 | cna | gain    | METABRIC |
| PD11327      | TNFAIP6 | cna | gain    | BASIS    |

|              |         |     |         |          |
|--------------|---------|-----|---------|----------|
| PD11742      | TNFAIP6 | cna | hetloss | BASIS    |
| PD13297      | TNFAIP6 | cna | hetloss | BASIS    |
| PD13299      | TNFAIP6 | cna | gain    | BASIS    |
| PD22355      | TNFAIP6 | cna | hetloss | BASIS    |
| PD23574      | TNFAIP6 | cna | gain    | BASIS    |
| PD23578      | TNFAIP6 | cna | hetloss | BASIS    |
| PD24186      | TNFAIP6 | cna | gain    | BASIS    |
| PD24202      | TNFAIP6 | cna | hetloss | BASIS    |
| PD24206      | TNFAIP6 | cna | gain    | BASIS    |
| PD3890       | TNFAIP6 | cna | hetloss | BASIS    |
| PD3905       | TNFAIP6 | cna | gain    | BASIS    |
| PD4005       | TNFAIP6 | cna | hetloss | BASIS    |
| PD4006       | TNFAIP6 | cna | hetloss | BASIS    |
| PD4107       | TNFAIP6 | cna | gain    | BASIS    |
| PD4967       | TNFAIP6 | cna | hetloss | BASIS    |
| PD5930       | TNFAIP6 | cna | hetloss | BASIS    |
| PD5935       | TNFAIP6 | cna | gain    | BASIS    |
| PD5948       | TNFAIP6 | cna | gain    | BASIS    |
| PD6406       | TNFAIP6 | cna | hetloss | BASIS    |
| PD6413       | TNFAIP6 | cna | hetloss | BASIS    |
| PD7067       | TNFAIP6 | cna | gain    | BASIS    |
| PD7215       | TNFAIP6 | cna | gain    | BASIS    |
| PD8621       | TNFAIP6 | cna | hetloss | BASIS    |
| PD9702       | TNFAIP6 | cna | gain    | BASIS    |
| TCGA-AN-A0XU | TNFSF9  | cna | hetloss | TCGA     |
| TCGA-AO-A0JL | TNFSF9  | cna | gain    | TCGA     |
| TCGA-BH-A0C0 | TNFSF9  | cna | gain    | TCGA     |
| TCGA-BH-A1FU | TNFSF9  | cna | hetloss | TCGA     |
| TCGA-C8-A12L | TNFSF9  | cna | hetloss | TCGA     |
| TCGA-D8-A27M | TNFSF9  | cna | hetloss | TCGA     |
| TCGA-EW-A10X | TNFSF9  | cna | hetloss | TCGA     |
| TCGA-LL-A5YP | TNFSF9  | cna | hetloss | TCGA     |
| MB-0346      | TNFSF9  | cna | gain    | METABRIC |
| MB-2827      | TNFSF9  | cna | hetloss | METABRIC |
| MB-5070      | TNFSF9  | cna | hetloss | METABRIC |
| MB-5465      | TNFSF9  | cna | gain    | METABRIC |
| MB-6098      | TNFSF9  | cna | hetloss | METABRIC |
| MB-7038      | TNFSF9  | cna | hetloss | METABRIC |
| MB-0420      | TNFSF9  | cna | hetloss | METABRIC |
| PD10014      | TNFSF9  | cna | hetloss | BASIS    |
| PD11327      | TNFSF9  | cna | homdel  | BASIS    |
| PD14442      | TNFSF9  | cna | hetloss | BASIS    |
| PD23574      | TNFSF9  | cna | gain    | BASIS    |
| PD24202      | TNFSF9  | cna | gain    | BASIS    |
| PD24206      | TNFSF9  | cna | hetloss | BASIS    |
| PD3905       | TNFSF9  | cna | gain    | BASIS    |
| PD4006       | TNFSF9  | cna | gain    | BASIS    |

|              |        |     |         |          |
|--------------|--------|-----|---------|----------|
| PD4107       | TNFSF9 | cna | gain    | BASIS    |
| PD4826       | TNFSF9 | cna | gain    | BASIS    |
| PD4967       | TNFSF9 | cna | homdel  | BASIS    |
| PD5930       | TNFSF9 | cna | gain    | BASIS    |
| PD5945       | TNFSF9 | cna | gain    | BASIS    |
| PD5948       | TNFSF9 | cna | gain    | BASIS    |
| PD7067       | TNFSF9 | cna | gain    | BASIS    |
| PD7215       | TNFSF9 | cna | amp     | BASIS    |
| PD8621       | TNFSF9 | cna | gain    | BASIS    |
| PD8980       | TNFSF9 | cna | gain    | BASIS    |
| PD9702       | TNFSF9 | cna | gain    | BASIS    |
| TCGA-AO-A0JL | TPRX1  | cna | hetloss | TCGA     |
| TCGA-BH-A0AW | TPRX1  | cna | gain    | TCGA     |
| TCGA-BH-A0C0 | TPRX1  | cna | hetloss | TCGA     |
| TCGA-BH-A1FU | TPRX1  | cna | hetloss | TCGA     |
| TCGA-D8-A27M | TPRX1  | cna | hetloss | TCGA     |
| TCGA-E2-A1L7 | TPRX1  | cna | hetloss | TCGA     |
| TCGA-EW-A10X | TPRX1  | cna | hetloss | TCGA     |
| TCGA-LL-A5YP | TPRX1  | cna | gain    | TCGA     |
| MB-0346      | TPRX1  | cna | hetloss | METABRIC |
| MB-6098      | TPRX1  | cna | hetloss | METABRIC |
| MB-7048      | TPRX1  | cna | gain    | METABRIC |
| PD11327      | TPRX1  | cna | gain    | BASIS    |
| PD13296      | TPRX1  | cna | hetloss | BASIS    |
| PD13299      | TPRX1  | cna | hetloss | BASIS    |
| PD13771      | TPRX1  | cna | hetloss | BASIS    |
| PD23562      | TPRX1  | cna | gain    | BASIS    |
| PD23574      | TPRX1  | cna | gain    | BASIS    |
| PD24186      | TPRX1  | cna | gain    | BASIS    |
| PD24206      | TPRX1  | cna | hetloss | BASIS    |
| PD24337      | TPRX1  | cna | hetloss | BASIS    |
| PD3890       | TPRX1  | cna | hetloss | BASIS    |
| PD3905       | TPRX1  | cna | gain    | BASIS    |
| PD4005       | TPRX1  | cna | hetloss | BASIS    |
| PD4006       | TPRX1  | cna | gain    | BASIS    |
| PD4826       | TPRX1  | cna | gain    | BASIS    |
| PD5935       | TPRX1  | cna | gain    | BASIS    |
| PD5945       | TPRX1  | cna | gain    | BASIS    |
| PD5948       | TPRX1  | cna | gain    | BASIS    |
| PD6406       | TPRX1  | cna | gain    | BASIS    |
| PD7067       | TPRX1  | cna | gain    | BASIS    |
| PD7215       | TPRX1  | cna | gain    | BASIS    |
| PD8621       | TPRX1  | cna | gain    | BASIS    |
| PD8980       | TPRX1  | cna | hetloss | BASIS    |
| PD9585       | TPRX1  | cna | gain    | BASIS    |
| TCGA-AO-A0JL | TYK2   | cna | gain    | TCGA     |
| TCGA-BH-A0C0 | TYK2   | cna | gain    | TCGA     |



|              |       |     |         |          |
|--------------|-------|-----|---------|----------|
| TCGA-BH-A1FU | TYK2  | cna | hetloss | TCGA     |
| TCGA-C8-A12L | TYK2  | cna | amp     | TCGA     |
| TCGA-D8-A27M | TYK2  | cna | hetloss | TCGA     |
| TCGA-EW-A10X | TYK2  | cna | hetloss | TCGA     |
| TCGA-LL-A5YP | TYK2  | cna | hetloss | TCGA     |
| MB-0346      | TYK2  | cna | hetloss | METABRIC |
| MB-2827      | TYK2  | cna | hetloss | METABRIC |
| MB-5070      | TYK2  | cna | hetloss | METABRIC |
| MB-5465      | TYK2  | cna | gain    | METABRIC |
| MB-6098      | TYK2  | cna | hetloss | METABRIC |
| MB-7038      | TYK2  | cna | hetloss | METABRIC |
| MB-0420      | TYK2  | cna | hetloss | METABRIC |
| PD11327      | TYK2  | cna | homdel  | BASIS    |
| PD13771      | TYK2  | cna | gain    | BASIS    |
| PD14442      | TYK2  | cna | hetloss | BASIS    |
| PD23562      | TYK2  | cna | gain    | BASIS    |
| PD23574      | TYK2  | cna | gain    | BASIS    |
| PD24206      | TYK2  | cna | homdel  | BASIS    |
| PD3905       | TYK2  | cna | gain    | BASIS    |
| PD4006       | TYK2  | cna | gain    | BASIS    |
| PD4107       | TYK2  | cna | gain    | BASIS    |
| PD4826       | TYK2  | cna | gain    | BASIS    |
| PD4967       | TYK2  | cna | hetloss | BASIS    |
| PD5930       | TYK2  | cna | gain    | BASIS    |
| PD5935       | TYK2  | cna | gain    | BASIS    |
| PD5945       | TYK2  | cna | amp     | BASIS    |
| PD5948       | TYK2  | cna | gain    | BASIS    |
| PD6406       | TYK2  | cna | amp     | BASIS    |
| PD7067       | TYK2  | cna | gain    | BASIS    |
| PD7215       | TYK2  | cna | amp     | BASIS    |
| PD8621       | TYK2  | cna | gain    | BASIS    |
| PD9702       | TYK2  | cna | gain    | BASIS    |
| TCGA-AO-A0JL | U2AF2 | cna | hetloss | TCGA     |
| TCGA-BH-A0AW | U2AF2 | cna | gain    | TCGA     |
| TCGA-BH-A0C0 | U2AF2 | cna | gain    | TCGA     |
| TCGA-BH-A1FU | U2AF2 | cna | hetloss | TCGA     |
| TCGA-C8-A12L | U2AF2 | cna | gain    | TCGA     |
| TCGA-D8-A27M | U2AF2 | cna | hetloss | TCGA     |
| TCGA-EW-A10X | U2AF2 | cna | hetloss | TCGA     |
| TCGA-LL-A5YP | U2AF2 | cna | gain    | TCGA     |
| MB-0346      | U2AF2 | cna | hetloss | METABRIC |
| MB-2827      | U2AF2 | cna | hetloss | METABRIC |
| MB-6098      | U2AF2 | cna | hetloss | METABRIC |
| MB-7048      | U2AF2 | cna | gain    | METABRIC |
| PD11327      | U2AF2 | cna | gain    | BASIS    |
| PD13296      | U2AF2 | cna | gain    | BASIS    |
| PD13299      | U2AF2 | cna | gain    | BASIS    |

|              |       |     |         |          |
|--------------|-------|-----|---------|----------|
| PD13771      | U2AF2 | cna | hetloss | BASIS    |
| PD23562      | U2AF2 | cna | gain    | BASIS    |
| PD23574      | U2AF2 | cna | gain    | BASIS    |
| PD24186      | U2AF2 | cna | gain    | BASIS    |
| PD24206      | U2AF2 | cna | hetloss | BASIS    |
| PD3890       | U2AF2 | cna | hetloss | BASIS    |
| PD3905       | U2AF2 | cna | gain    | BASIS    |
| PD4006       | U2AF2 | cna | gain    | BASIS    |
| PD4107       | U2AF2 | cna | gain    | BASIS    |
| PD4826       | U2AF2 | cna | gain    | BASIS    |
| PD5935       | U2AF2 | cna | gain    | BASIS    |
| PD5945       | U2AF2 | cna | gain    | BASIS    |
| PD5948       | U2AF2 | cna | gain    | BASIS    |
| PD6406       | U2AF2 | cna | gain    | BASIS    |
| PD7067       | U2AF2 | cna | gain    | BASIS    |
| PD7215       | U2AF2 | cna | gain    | BASIS    |
| PD8621       | U2AF2 | cna | gain    | BASIS    |
| PD8980       | U2AF2 | cna | hetloss | BASIS    |
| PD9585       | U2AF2 | cna | gain    | BASIS    |
| TCGA-A2-A25B | XPA   | cna | gain    | TCGA     |
| TCGA-AN-A0XU | XPA   | cna | hetloss | TCGA     |
| TCGA-AO-A0JL | XPA   | cna | hetloss | TCGA     |
| TCGA-BH-A1FU | XPA   | cna | hetloss | TCGA     |
| TCGA-C8-A12L | XPA   | cna | hetloss | TCGA     |
| TCGA-E2-A1L7 | XPA   | cna | hetloss | TCGA     |
| TCGA-E9-A1NC | XPA   | cna | hetloss | TCGA     |
| TCGA-LL-A5YP | XPA   | cna | hetloss | TCGA     |
| MB-0346      | XPA   | cna | hetloss | METABRIC |
| MB-2827      | XPA   | cna | hetloss | METABRIC |
| MB-5070      | XPA   | cna | hetloss | METABRIC |
| MB-5107      | XPA   | cna | hetloss | METABRIC |
| MB-6098      | XPA   | cna | hetloss | METABRIC |
| MB-7038      | XPA   | cna | hetloss | METABRIC |
| PD11327      | XPA   | cna | gain    | BASIS    |
| PD13296      | XPA   | cna | gain    | BASIS    |
| PD23562      | XPA   | cna | gain    | BASIS    |
| PD23578      | XPA   | cna | hetloss | BASIS    |
| PD24186      | XPA   | cna | amp     | BASIS    |
| PD24202      | XPA   | cna | hetloss | BASIS    |
| PD24206      | XPA   | cna | gain    | BASIS    |
| PD3905       | XPA   | cna | gain    | BASIS    |
| PD4005       | XPA   | cna | gain    | BASIS    |
| PD4006       | XPA   | cna | gain    | BASIS    |
| PD4107       | XPA   | cna | hetloss | BASIS    |
| PD5945       | XPA   | cna | amp     | BASIS    |
| PD6406       | XPA   | cna | hetloss | BASIS    |
| PD6731       | XPA   | cna | hetloss | BASIS    |

|              |         |     |         |          |
|--------------|---------|-----|---------|----------|
| PD7067       | XPA     | cna | gain    | BASIS    |
| PD7215       | XPA     | cna | gain    | BASIS    |
| PD8621       | XPA     | cna | gain    | BASIS    |
| PD8980       | XPA     | cna | gain    | BASIS    |
| PD9004       | XPA     | cna | gain    | BASIS    |
| PD9585       | XPA     | cna | hetloss | BASIS    |
| TCGA-BH-A0C0 | XPC     | cna | gain    | TCGA     |
| TCGA-BH-A18R | XPC     | cna | gain    | TCGA     |
| TCGA-BH-A1FU | XPC     | cna | hetloss | TCGA     |
| TCGA-D8-A27M | XPC     | cna | hetloss | TCGA     |
| TCGA-E9-A1NC | XPC     | cna | hetloss | TCGA     |
| TCGA-LL-A5YP | XPC     | cna | amp     | TCGA     |
| MB-0346      | XPC     | cna | gain    | METABRIC |
| MB-5070      | XPC     | cna | hetloss | METABRIC |
| MB-7038      | XPC     | cna | hetloss | METABRIC |
| MB-7048      | XPC     | cna | hetloss | METABRIC |
| MB-0420      | XPC     | cna | hetloss | METABRIC |
| PD10014      | XPC     | cna | hetloss | BASIS    |
| PD11742      | XPC     | cna | gain    | BASIS    |
| PD13296      | XPC     | cna | gain    | BASIS    |
| PD13299      | XPC     | cna | gain    | BASIS    |
| PD13771      | XPC     | cna | gain    | BASIS    |
| PD23561      | XPC     | cna | hetloss | BASIS    |
| PD23562      | XPC     | cna | gain    | BASIS    |
| PD23574      | XPC     | cna | gain    | BASIS    |
| PD24206      | XPC     | cna | gain    | BASIS    |
| PD24337      | XPC     | cna | hetloss | BASIS    |
| PD3905       | XPC     | cna | gain    | BASIS    |
| PD4006       | XPC     | cna | gain    | BASIS    |
| PD4826       | XPC     | cna | gain    | BASIS    |
| PD5945       | XPC     | cna | amp     | BASIS    |
| PD5948       | XPC     | cna | gain    | BASIS    |
| PD6406       | XPC     | cna | hetloss | BASIS    |
| PD6731       | XPC     | cna | hetloss | BASIS    |
| PD7067       | XPC     | cna | amp     | BASIS    |
| PD7215       | XPC     | cna | gain    | BASIS    |
| PD8980       | XPC     | cna | gain    | BASIS    |
| PD9004       | XPC     | cna | gain    | BASIS    |
| PD9585       | XPC     | cna | hetloss | BASIS    |
| PD9702       | XPC     | cna | gain    | BASIS    |
| TCGA-A2-A25B | ZFP36L1 | cna | hetloss | TCGA     |
| TCGA-AO-A0JL | ZFP36L1 | cna | hetloss | TCGA     |
| TCGA-BH-A0AW | ZFP36L1 | cna | hetloss | TCGA     |
| TCGA-BH-A1FU | ZFP36L1 | cna | gain    | TCGA     |
| TCGA-C8-A12L | ZFP36L1 | cna | hetloss | TCGA     |
| TCGA-D8-A27M | ZFP36L1 | cna | hetloss | TCGA     |
| TCGA-E2-A1L7 | ZFP36L1 | cna | hetloss | TCGA     |

|              |         |     |         |          |
|--------------|---------|-----|---------|----------|
| TCGA-LL-A5YP | ZFP36L1 | cna | hetloss | TCGA     |
| MB-2827      | ZFP36L1 | cna | hetloss | METABRIC |
| MB-5070      | ZFP36L1 | cna | hetloss | METABRIC |
| MB-6098      | ZFP36L1 | cna | hetloss | METABRIC |
| MB-7038      | ZFP36L1 | cna | hetloss | METABRIC |
| MTS-T0064    | ZFP36L1 | cna | gain    | METABRIC |
| PD11327      | ZFP36L1 | cna | amp     | BASIS    |
| PD11742      | ZFP36L1 | cna | hetloss | BASIS    |
| PD13296      | ZFP36L1 | cna | gain    | BASIS    |
| PD13297      | ZFP36L1 | cna | hetloss | BASIS    |
| PD13771      | ZFP36L1 | cna | hetloss | BASIS    |
| PD14442      | ZFP36L1 | cna | hetloss | BASIS    |
| PD23578      | ZFP36L1 | cna | hetloss | BASIS    |
| PD24202      | ZFP36L1 | cna | hetloss | BASIS    |
| PD24206      | ZFP36L1 | cna | gain    | BASIS    |
| PD24337      | ZFP36L1 | cna | hetloss | BASIS    |
| PD3890       | ZFP36L1 | cna | hetloss | BASIS    |
| PD3905       | ZFP36L1 | cna | gain    | BASIS    |
| PD4005       | ZFP36L1 | cna | hetloss | BASIS    |
| PD4006       | ZFP36L1 | cna | gain    | BASIS    |
| PD5945       | ZFP36L1 | cna | gain    | BASIS    |
| PD6406       | ZFP36L1 | cna | hetloss | BASIS    |
| PD7067       | ZFP36L1 | cna | gain    | BASIS    |
| PD7215       | ZFP36L1 | cna | hetloss | BASIS    |
| PD8980       | ZFP36L1 | cna | gain    | BASIS    |
| PD9004       | ZFP36L1 | cna | hetloss | BASIS    |
| PD9702       | ZFP36L1 | cna | gain    | BASIS    |
| TCGA-AO-A0JL | ZNF132  | cna | hetloss | TCGA     |
| TCGA-BH-A0AW | ZNF132  | cna | gain    | TCGA     |
| TCGA-BH-A0C0 | ZNF132  | cna | gain    | TCGA     |
| TCGA-BH-A1FU | ZNF132  | cna | hetloss | TCGA     |
| TCGA-C8-A12L | ZNF132  | cna | gain    | TCGA     |
| TCGA-D8-A27M | ZNF132  | cna | gain    | TCGA     |
| TCGA-EW-A10X | ZNF132  | cna | hetloss | TCGA     |
| TCGA-LL-A5YP | ZNF132  | cna | gain    | TCGA     |
| MB-0346      | ZNF132  | cna | hetloss | METABRIC |
| MB-2827      | ZNF132  | cna | hetloss | METABRIC |
| MB-7048      | ZNF132  | cna | gain    | METABRIC |
| MB-0420      | ZNF132  | cna | hetloss | METABRIC |
| MTS-T0064    | ZNF132  | cna | hetloss | METABRIC |
| PD11327      | ZNF132  | cna | hetloss | BASIS    |
| PD13296      | ZNF132  | cna | gain    | BASIS    |
| PD13299      | ZNF132  | cna | gain    | BASIS    |
| PD13771      | ZNF132  | cna | hetloss | BASIS    |
| PD23562      | ZNF132  | cna | hetloss | BASIS    |
| PD23574      | ZNF132  | cna | gain    | BASIS    |
| PD24186      | ZNF132  | cna | gain    | BASIS    |

|              |        |     |         |          |
|--------------|--------|-----|---------|----------|
| PD24206      | ZNF132 | cna | hetloss | BASIS    |
| PD3890       | ZNF132 | cna | hetloss | BASIS    |
| PD3905       | ZNF132 | cna | gain    | BASIS    |
| PD4006       | ZNF132 | cna | gain    | BASIS    |
| PD4107       | ZNF132 | cna | gain    | BASIS    |
| PD4826       | ZNF132 | cna | gain    | BASIS    |
| PD5935       | ZNF132 | cna | gain    | BASIS    |
| PD5945       | ZNF132 | cna | gain    | BASIS    |
| PD5948       | ZNF132 | cna | gain    | BASIS    |
| PD6406       | ZNF132 | cna | gain    | BASIS    |
| PD7067       | ZNF132 | cna | gain    | BASIS    |
| PD7215       | ZNF132 | cna | gain    | BASIS    |
| PD8980       | ZNF132 | cna | hetloss | BASIS    |
| PD9585       | ZNF132 | cna | gain    | BASIS    |
| TCGA-A2-A25B | ABL1   | cna | gain    | TCGA     |
| TCGA-AN-A0XU | ABL1   | cna | hetloss | TCGA     |
| TCGA-AO-A0JL | ABL1   | cna | hetloss | TCGA     |
| TCGA-BH-A0C0 | ABL1   | cna | gain    | TCGA     |
| TCGA-C8-A12L | ABL1   | cna | gain    | TCGA     |
| TCGA-E2-A1L7 | ABL1   | cna | gain    | TCGA     |
| TCGA-E9-A1NC | ABL1   | cna | hetloss | TCGA     |
| TCGA-LL-A5YP | ABL1   | cna | hetloss | TCGA     |
| MB-0346      | ABL1   | cna | hetloss | METABRIC |
| MB-5070      | ABL1   | cna | hetloss | METABRIC |
| MB-5107      | ABL1   | cna | gain    | METABRIC |
| MB-7038      | ABL1   | cna | hetloss | METABRIC |
| MB-0420      | ABL1   | cna | hetloss | METABRIC |
| PD10014      | ABL1   | cna | gain    | BASIS    |
| PD11327      | ABL1   | cna | hetloss | BASIS    |
| PD13299      | ABL1   | cna | gain    | BASIS    |
| PD22355      | ABL1   | cna | gain    | BASIS    |
| PD24186      | ABL1   | cna | gain    | BASIS    |
| PD24202      | ABL1   | cna | hetloss | BASIS    |
| PD24337      | ABL1   | cna | hetloss | BASIS    |
| PD3890       | ABL1   | cna | hetloss | BASIS    |
| PD3905       | ABL1   | cna | gain    | BASIS    |
| PD4005       | ABL1   | cna | hetloss | BASIS    |
| PD4006       | ABL1   | cna | gain    | BASIS    |
| PD4107       | ABL1   | cna | hetloss | BASIS    |
| PD5945       | ABL1   | cna | gain    | BASIS    |
| PD5948       | ABL1   | cna | gain    | BASIS    |
| PD6406       | ABL1   | cna | hetloss | BASIS    |
| PD6731       | ABL1   | cna | hetloss | BASIS    |
| PD7067       | ABL1   | cna | gain    | BASIS    |
| PD7215       | ABL1   | cna | gain    | BASIS    |
| PD8621       | ABL1   | cna | gain    | BASIS    |
| PD9004       | ABL1   | cna | hetloss | BASIS    |

|              |          |     |         |          |
|--------------|----------|-----|---------|----------|
| TCGA-AO-A0JL | ARHGAP35 | cna | hetloss | TCGA     |
| TCGA-BH-A0AW | ARHGAP35 | cna | gain    | TCGA     |
| TCGA-BH-A0C0 | ARHGAP35 | cna | hetloss | TCGA     |
| TCGA-BH-A1FU | ARHGAP35 | cna | hetloss | TCGA     |
| TCGA-D8-A27M | ARHGAP35 | cna | hetloss | TCGA     |
| TCGA-E2-A1L7 | ARHGAP35 | cna | hetloss | TCGA     |
| TCGA-EW-A10X | ARHGAP35 | cna | hetloss | TCGA     |
| TCGA-LL-A5YP | ARHGAP35 | cna | gain    | TCGA     |
| MB-0346      | ARHGAP35 | cna | hetloss | METABRIC |
| MB-6098      | ARHGAP35 | cna | gain    | METABRIC |
| PD11327      | ARHGAP35 | cna | gain    | BASIS    |
| PD13296      | ARHGAP35 | cna | hetloss | BASIS    |
| PD13299      | ARHGAP35 | cna | hetloss | BASIS    |
| PD13771      | ARHGAP35 | cna | hetloss | BASIS    |
| PD23562      | ARHGAP35 | cna | gain    | BASIS    |
| PD23574      | ARHGAP35 | cna | gain    | BASIS    |
| PD24186      | ARHGAP35 | cna | gain    | BASIS    |
| PD24206      | ARHGAP35 | cna | hetloss | BASIS    |
| PD24337      | ARHGAP35 | cna | hetloss | BASIS    |
| PD3890       | ARHGAP35 | cna | hetloss | BASIS    |
| PD3905       | ARHGAP35 | cna | gain    | BASIS    |
| PD4005       | ARHGAP35 | cna | hetloss | BASIS    |
| PD4006       | ARHGAP35 | cna | gain    | BASIS    |
| PD4826       | ARHGAP35 | cna | gain    | BASIS    |
| PD5935       | ARHGAP35 | cna | gain    | BASIS    |
| PD5945       | ARHGAP35 | cna | gain    | BASIS    |
| PD5948       | ARHGAP35 | cna | gain    | BASIS    |
| PD6406       | ARHGAP35 | cna | gain    | BASIS    |
| PD7067       | ARHGAP35 | cna | gain    | BASIS    |
| PD7215       | ARHGAP35 | cna | gain    | BASIS    |
| PD8621       | ARHGAP35 | cna | gain    | BASIS    |
| PD8980       | ARHGAP35 | cna | hetloss | BASIS    |
| PD9585       | ARHGAP35 | cna | gain    | BASIS    |
| TCGA-A2-A25B | ATP10A   | cna | homdel  | TCGA     |
| TCGA-AO-A0JL | ATP10A   | cna | hetloss | TCGA     |
| TCGA-BH-A0C0 | ATP10A   | cna | hetloss | TCGA     |
| TCGA-C8-A12L | ATP10A   | cna | hetloss | TCGA     |
| TCGA-D8-A27M | ATP10A   | cna | hetloss | TCGA     |
| TCGA-E2-A1L7 | ATP10A   | cna | hetloss | TCGA     |
| MB-2827      | ATP10A   | cna | hetloss | METABRIC |
| MB-5070      | ATP10A   | cna | hetloss | METABRIC |
| MB-6098      | ATP10A   | cna | hetloss | METABRIC |
| MB-7038      | ATP10A   | cna | hetloss | METABRIC |
| MB-0420      | ATP10A   | cna | hetloss | METABRIC |
| PD11327      | ATP10A   | cna | hetloss | BASIS    |
| PD11742      | ATP10A   | cna | hetloss | BASIS    |
| PD13296      | ATP10A   | cna | gain    | BASIS    |

|              |        |     |         |          |
|--------------|--------|-----|---------|----------|
| PD13297      | ATP10A | cna | hetloss | BASIS    |
| PD13299      | ATP10A | cna | gain    | BASIS    |
| PD23574      | ATP10A | cna | hetloss | BASIS    |
| PD23578      | ATP10A | cna | hetloss | BASIS    |
| PD24202      | ATP10A | cna | hetloss | BASIS    |
| PD24206      | ATP10A | cna | gain    | BASIS    |
| PD3890       | ATP10A | cna | hetloss | BASIS    |
| PD3905       | ATP10A | cna | gain    | BASIS    |
| PD4005       | ATP10A | cna | hetloss | BASIS    |
| PD5930       | ATP10A | cna | hetloss | BASIS    |
| PD5935       | ATP10A | cna | gain    | BASIS    |
| PD5945       | ATP10A | cna | amp     | BASIS    |
| PD5948       | ATP10A | cna | hetloss | BASIS    |
| PD6413       | ATP10A | cna | hetloss | BASIS    |
| PD7067       | ATP10A | cna | gain    | BASIS    |
| PD7215       | ATP10A | cna | gain    | BASIS    |
| PD8980       | ATP10A | cna | hetloss | BASIS    |
| PD9004       | ATP10A | cna | gain    | BASIS    |
| PD9585       | ATP10A | cna | hetloss | BASIS    |
| TCGA-AO-A0JL | BBC3   | cna | hetloss | TCGA     |
| TCGA-BH-A0AW | BBC3   | cna | gain    | TCGA     |
| TCGA-BH-A0C0 | BBC3   | cna | hetloss | TCGA     |
| TCGA-BH-A1FU | BBC3   | cna | hetloss | TCGA     |
| TCGA-D8-A27M | BBC3   | cna | hetloss | TCGA     |
| TCGA-E2-A1L7 | BBC3   | cna | hetloss | TCGA     |
| TCGA-EW-A10X | BBC3   | cna | hetloss | TCGA     |
| TCGA-LL-A5YP | BBC3   | cna | gain    | TCGA     |
| MB-0346      | BBC3   | cna | hetloss | METABRIC |
| MB-6098      | BBC3   | cna | gain    | METABRIC |
| PD11327      | BBC3   | cna | gain    | BASIS    |
| PD13296      | BBC3   | cna | hetloss | BASIS    |
| PD13299      | BBC3   | cna | hetloss | BASIS    |
| PD13771      | BBC3   | cna | hetloss | BASIS    |
| PD23562      | BBC3   | cna | gain    | BASIS    |
| PD23574      | BBC3   | cna | gain    | BASIS    |
| PD24186      | BBC3   | cna | gain    | BASIS    |
| PD24206      | BBC3   | cna | hetloss | BASIS    |
| PD24337      | BBC3   | cna | hetloss | BASIS    |
| PD3890       | BBC3   | cna | hetloss | BASIS    |
| PD3905       | BBC3   | cna | gain    | BASIS    |
| PD4005       | BBC3   | cna | hetloss | BASIS    |
| PD4006       | BBC3   | cna | gain    | BASIS    |
| PD4826       | BBC3   | cna | gain    | BASIS    |
| PD5935       | BBC3   | cna | gain    | BASIS    |
| PD5945       | BBC3   | cna | gain    | BASIS    |
| PD5948       | BBC3   | cna | gain    | BASIS    |
| PD6406       | BBC3   | cna | gain    | BASIS    |

|                   |        |     |         |            |
|-------------------|--------|-----|---------|------------|
| PD7067            | BBC3   | cna | gain    | BASIS      |
| PD7215            | BBC3   | cna | gain    | BASIS      |
| PD8621            | BBC3   | cna | gain    | BASIS      |
| PD8980            | BBC3   | cna | hetloss | BASIS      |
| PD9585            | BBC3   | cna | gain    | BASIS      |
| TCGA-A2-A25B      | BCL2L1 | cna | gain    | TCGA       |
| TCGA-AO-A0JL      | BCL2L1 | cna | gain    | TCGA       |
| TCGA-BH-A0AW      | BCL2L1 | cna | gain    | TCGA       |
| TCGA-BH-A0C0      | BCL2L1 | cna | gain    | TCGA       |
| TCGA-C8-A12L      | BCL2L1 | cna | gain    | TCGA       |
| TCGA-D8-A27M      | BCL2L1 | cna | gain    | TCGA       |
| TCGA-E2-A1L7      | BCL2L1 | cna | gain    | TCGA       |
| TCGA-E9-A1NC      | BCL2L1 | cna | hetloss | TCGA       |
| TCGA-LL-A5YP      | BCL2L1 | cna | gain    | TCGA       |
| MB-0346           | BCL2L1 | cna | gain    | METABRIC   |
| MB-5070           | BCL2L1 | cna | amp     | METABRIC   |
| MB-6060           | BCL2L1 | cna | gain    | METABRIC   |
| MB-7038           | BCL2L1 | cna | hetloss | METABRIC   |
| P-0010758-T01-IM5 | BCL2L1 | cna | amp     | MSK-IMPACT |
| PD11327           | BCL2L1 | cna | homdel  | BASIS      |
| PD13296           | BCL2L1 | cna | gain    | BASIS      |
| PD13297           | BCL2L1 | cna | gain    | BASIS      |
| PD13299           | BCL2L1 | cna | gain    | BASIS      |
| PD23574           | BCL2L1 | cna | gain    | BASIS      |
| PD23578           | BCL2L1 | cna | hetloss | BASIS      |
| PD24186           | BCL2L1 | cna | gain    | BASIS      |
| PD24206           | BCL2L1 | cna | gain    | BASIS      |
| PD3905            | BCL2L1 | cna | gain    | BASIS      |
| PD4107            | BCL2L1 | cna | amp     | BASIS      |
| PD4826            | BCL2L1 | cna | gain    | BASIS      |
| PD5930            | BCL2L1 | cna | gain    | BASIS      |
| PD5935            | BCL2L1 | cna | gain    | BASIS      |
| PD5945            | BCL2L1 | cna | amp     | BASIS      |
| PD5948            | BCL2L1 | cna | gain    | BASIS      |
| PD7067            | BCL2L1 | cna | gain    | BASIS      |
| PD7215            | BCL2L1 | cna | gain    | BASIS      |
| PD9004            | BCL2L1 | cna | gain    | BASIS      |
| PD9702            | BCL2L1 | cna | gain    | BASIS      |
| TCGA-BH-A0C0      | BTLA   | cna | hetloss | TCGA       |
| TCGA-BH-A18R      | BTLA   | cna | gain    | TCGA       |
| TCGA-BH-A1FU      | BTLA   | cna | hetloss | TCGA       |
| TCGA-C8-A12L      | BTLA   | cna | hetloss | TCGA       |
| TCGA-E2-A1L7      | BTLA   | cna | hetloss | TCGA       |
| TCGA-LL-A5YP      | BTLA   | cna | gain    | TCGA       |
| MB-0346           | BTLA   | cna | hetloss | METABRIC   |
| MB-5070           | BTLA   | cna | hetloss | METABRIC   |
| MB-5107           | BTLA   | cna | gain    | METABRIC   |



|                   |       |     |         |            |
|-------------------|-------|-----|---------|------------|
| MB-5465           | BTLA  | cna | gain    | METABRIC   |
| MTS-T0064         | BTLA  | cna | hetloss | METABRIC   |
| PD11327           | BTLA  | cna | gain    | BASIS      |
| PD13296           | BTLA  | cna | hetloss | BASIS      |
| PD13299           | BTLA  | cna | gain    | BASIS      |
| PD23561           | BTLA  | cna | hetloss | BASIS      |
| PD23574           | BTLA  | cna | gain    | BASIS      |
| PD23578           | BTLA  | cna | gain    | BASIS      |
| PD24186           | BTLA  | cna | gain    | BASIS      |
| PD24206           | BTLA  | cna | gain    | BASIS      |
| PD3905            | BTLA  | cna | gain    | BASIS      |
| PD4005            | BTLA  | cna | hetloss | BASIS      |
| PD4006            | BTLA  | cna | hetloss | BASIS      |
| PD4107            | BTLA  | cna | gain    | BASIS      |
| PD4826            | BTLA  | cna | gain    | BASIS      |
| PD5935            | BTLA  | cna | gain    | BASIS      |
| PD5945            | BTLA  | cna | gain    | BASIS      |
| PD5948            | BTLA  | cna | gain    | BASIS      |
| PD7067            | BTLA  | cna | gain    | BASIS      |
| PD7215            | BTLA  | cna | gain    | BASIS      |
| PD8621            | BTLA  | cna | gain    | BASIS      |
| PD8980            | BTLA  | cna | gain    | BASIS      |
| PD9004            | BTLA  | cna | gain    | BASIS      |
| PD9702            | BTLA  | cna | gain    | BASIS      |
| TCGA-AN-A0XU      | CCNE1 | cna | gain    | TCGA       |
| TCGA-AO-A0JL      | CCNE1 | cna | amp     | TCGA       |
| TCGA-BH-A0AW      | CCNE1 | cna | gain    | TCGA       |
| TCGA-BH-A0C0      | CCNE1 | cna | gain    | TCGA       |
| TCGA-BH-A1FU      | CCNE1 | cna | hetloss | TCGA       |
| TCGA-C8-A12L      | CCNE1 | cna | gain    | TCGA       |
| TCGA-D8-A27M      | CCNE1 | cna | amp     | TCGA       |
| TCGA-E9-A1NC      | CCNE1 | cna | hetloss | TCGA       |
| TCGA-EW-A10X      | CCNE1 | cna | hetloss | TCGA       |
| TCGA-LL-A5YP      | CCNE1 | cna | gain    | TCGA       |
| MB-0346           | CCNE1 | cna | hetloss | METABRIC   |
| MB-6098           | CCNE1 | cna | gain    | METABRIC   |
| MB-7038           | CCNE1 | cna | gain    | METABRIC   |
| P-0009557-T01-IM5 | CCNE1 | cna | amp     | MSK-IMPACT |
| PD10014           | CCNE1 | cna | hetloss | BASIS      |
| PD11327           | CCNE1 | cna | gain    | BASIS      |
| PD13296           | CCNE1 | cna | gain    | BASIS      |
| PD13299           | CCNE1 | cna | gain    | BASIS      |
| PD23562           | CCNE1 | cna | gain    | BASIS      |
| PD23574           | CCNE1 | cna | amp     | BASIS      |
| PD24186           | CCNE1 | cna | gain    | BASIS      |
| PD3905            | CCNE1 | cna | gain    | BASIS      |
| PD4006            | CCNE1 | cna | gain    | BASIS      |

|              |        |     |         |          |
|--------------|--------|-----|---------|----------|
| PD4826       | CCNE1  | cna | gain    | BASIS    |
| PD4967       | CCNE1  | cna | gain    | BASIS    |
| PD5935       | CCNE1  | cna | gain    | BASIS    |
| PD5945       | CCNE1  | cna | amp     | BASIS    |
| PD5948       | CCNE1  | cna | gain    | BASIS    |
| PD7067       | CCNE1  | cna | gain    | BASIS    |
| PD7215       | CCNE1  | cna | gain    | BASIS    |
| PD8621       | CCNE1  | cna | gain    | BASIS    |
| PD8980       | CCNE1  | cna | hetloss | BASIS    |
| PD9702       | CCNE1  | cna | gain    | BASIS    |
| TCGA-A2-A25B | CDKN2C | cna | gain    | TCGA     |
| TCGA-AN-A0XU | CDKN2C | cna | gain    | TCGA     |
| TCGA-AO-A0JL | CDKN2C | cna | hetloss | TCGA     |
| TCGA-BH-A0AW | CDKN2C | cna | gain    | TCGA     |
| TCGA-BH-A0C0 | CDKN2C | cna | gain    | TCGA     |
| TCGA-BH-A1FU | CDKN2C | cna | gain    | TCGA     |
| TCGA-D8-A27M | CDKN2C | cna | gain    | TCGA     |
| TCGA-E2-A1L7 | CDKN2C | cna | gain    | TCGA     |
| TCGA-LL-A5YP | CDKN2C | cna | hetloss | TCGA     |
| MB-0346      | CDKN2C | cna | hetloss | METABRIC |
| MB-6060      | CDKN2C | cna | hetloss | METABRIC |
| MB-7038      | CDKN2C | cna | gain    | METABRIC |
| MB-0420      | CDKN2C | cna | hetloss | METABRIC |
| PD11327      | CDKN2C | cna | hetloss | BASIS    |
| PD11742      | CDKN2C | cna | hetloss | BASIS    |
| PD13299      | CDKN2C | cna | gain    | BASIS    |
| PD24186      | CDKN2C | cna | amp     | BASIS    |
| PD24206      | CDKN2C | cna | gain    | BASIS    |
| PD3905       | CDKN2C | cna | gain    | BASIS    |
| PD4005       | CDKN2C | cna | hetloss | BASIS    |
| PD4006       | CDKN2C | cna | gain    | BASIS    |
| PD4107       | CDKN2C | cna | gain    | BASIS    |
| PD4826       | CDKN2C | cna | gain    | BASIS    |
| PD5930       | CDKN2C | cna | gain    | BASIS    |
| PD5935       | CDKN2C | cna | gain    | BASIS    |
| PD5945       | CDKN2C | cna | amp     | BASIS    |
| PD5948       | CDKN2C | cna | gain    | BASIS    |
| PD6413       | CDKN2C | cna | hetloss | BASIS    |
| PD7067       | CDKN2C | cna | gain    | BASIS    |
| PD7215       | CDKN2C | cna | gain    | BASIS    |
| PD8621       | CDKN2C | cna | gain    | BASIS    |
| PD9004       | CDKN2C | cna | gain    | BASIS    |
| PD9702       | CDKN2C | cna | gain    | BASIS    |
| TCGA-AO-A0JL | CHN1   | cna | gain    | TCGA     |
| TCGA-BH-A0AW | CHN1   | cna | gain    | TCGA     |
| TCGA-D8-A27M | CHN1   | cna | gain    | TCGA     |
| TCGA-LL-A5YP | CHN1   | cna | gain    | TCGA     |

|              |      |     |         |          |
|--------------|------|-----|---------|----------|
| MB-2827      | CHN1 | cna | hetloss | METABRIC |
| MB-5107      | CHN1 | cna | hetloss | METABRIC |
| MB-6098      | CHN1 | cna | hetloss | METABRIC |
| MB-6271      | CHN1 | cna | hetloss | METABRIC |
| MB-7032      | CHN1 | cna | gain    | METABRIC |
| MB-7038      | CHN1 | cna | gain    | METABRIC |
| MB-0420      | CHN1 | cna | gain    | METABRIC |
| PD10014      | CHN1 | cna | gain    | BASIS    |
| PD11327      | CHN1 | cna | gain    | BASIS    |
| PD13299      | CHN1 | cna | gain    | BASIS    |
| PD22355      | CHN1 | cna | hetloss | BASIS    |
| PD24186      | CHN1 | cna | gain    | BASIS    |
| PD24202      | CHN1 | cna | gain    | BASIS    |
| PD24206      | CHN1 | cna | gain    | BASIS    |
| PD3890       | CHN1 | cna | hetloss | BASIS    |
| PD3905       | CHN1 | cna | gain    | BASIS    |
| PD4006       | CHN1 | cna | gain    | BASIS    |
| PD4107       | CHN1 | cna | gain    | BASIS    |
| PD4967       | CHN1 | cna | hetloss | BASIS    |
| PD5930       | CHN1 | cna | hetloss | BASIS    |
| PD5935       | CHN1 | cna | gain    | BASIS    |
| PD5945       | CHN1 | cna | amp     | BASIS    |
| PD5948       | CHN1 | cna | gain    | BASIS    |
| PD6413       | CHN1 | cna | hetloss | BASIS    |
| PD7067       | CHN1 | cna | gain    | BASIS    |
| PD7215       | CHN1 | cna | gain    | BASIS    |
| PD9004       | CHN1 | cna | gain    | BASIS    |
| PD9585       | CHN1 | cna | hetloss | BASIS    |
| PD9702       | CHN1 | cna | gain    | BASIS    |
| TCGA-AN-A0XU | CUL3 | cna | hetloss | TCGA     |
| TCGA-AO-A0JL | CUL3 | cna | gain    | TCGA     |
| TCGA-BH-A0AW | CUL3 | cna | hetloss | TCGA     |
| TCGA-C8-A12L | CUL3 | cna | hetloss | TCGA     |
| TCGA-D8-A27M | CUL3 | cna | gain    | TCGA     |
| TCGA-E2-A1L7 | CUL3 | cna | hetloss | TCGA     |
| TCGA-E9-A1NC | CUL3 | cna | hetloss | TCGA     |
| MB-2827      | CUL3 | cna | hetloss | METABRIC |
| MB-6060      | CUL3 | cna | hetloss | METABRIC |
| MB-6098      | CUL3 | cna | hetloss | METABRIC |
| MB-6271      | CUL3 | cna | hetloss | METABRIC |
| MB-7038      | CUL3 | cna | gain    | METABRIC |
| PD10014      | CUL3 | cna | gain    | BASIS    |
| PD11327      | CUL3 | cna | gain    | BASIS    |
| PD13296      | CUL3 | cna | hetloss | BASIS    |
| PD13297      | CUL3 | cna | hetloss | BASIS    |
| PD23578      | CUL3 | cna | hetloss | BASIS    |
| PD24186      | CUL3 | cna | gain    | BASIS    |

|              |      |     |         |          |
|--------------|------|-----|---------|----------|
| PD24337      | CUL3 | cna | hetloss | BASIS    |
| PD3890       | CUL3 | cna | hetloss | BASIS    |
| PD4005       | CUL3 | cna | gain    | BASIS    |
| PD4006       | CUL3 | cna | hetloss | BASIS    |
| PD4967       | CUL3 | cna | hetloss | BASIS    |
| PD5935       | CUL3 | cna | gain    | BASIS    |
| PD5945       | CUL3 | cna | gain    | BASIS    |
| PD5948       | CUL3 | cna | gain    | BASIS    |
| PD6406       | CUL3 | cna | hetloss | BASIS    |
| PD6413       | CUL3 | cna | hetloss | BASIS    |
| PD6731       | CUL3 | cna | hetloss | BASIS    |
| PD7067       | CUL3 | cna | gain    | BASIS    |
| PD7215       | CUL3 | cna | gain    | BASIS    |
| PD8980       | CUL3 | cna | hetloss | BASIS    |
| PD9585       | CUL3 | cna | hetloss | BASIS    |
| TCGA-AO-A0JL | DNM2 | cna | gain    | TCGA     |
| TCGA-BH-A0C0 | DNM2 | cna | gain    | TCGA     |
| TCGA-BH-A1FU | DNM2 | cna | hetloss | TCGA     |
| TCGA-C8-A12L | DNM2 | cna | amp     | TCGA     |
| TCGA-D8-A27M | DNM2 | cna | hetloss | TCGA     |
| TCGA-EW-A10X | DNM2 | cna | hetloss | TCGA     |
| TCGA-LL-A5YP | DNM2 | cna | hetloss | TCGA     |
| MB-0346      | DNM2 | cna | hetloss | METABRIC |
| MB-2827      | DNM2 | cna | hetloss | METABRIC |
| MB-5070      | DNM2 | cna | hetloss | METABRIC |
| MB-5465      | DNM2 | cna | gain    | METABRIC |
| MB-6098      | DNM2 | cna | hetloss | METABRIC |
| MB-7038      | DNM2 | cna | hetloss | METABRIC |
| MB-0420      | DNM2 | cna | hetloss | METABRIC |
| PD11327      | DNM2 | cna | homdel  | BASIS    |
| PD13771      | DNM2 | cna | gain    | BASIS    |
| PD14442      | DNM2 | cna | hetloss | BASIS    |
| PD23562      | DNM2 | cna | gain    | BASIS    |
| PD23574      | DNM2 | cna | gain    | BASIS    |
| PD24206      | DNM2 | cna | homdel  | BASIS    |
| PD3905       | DNM2 | cna | gain    | BASIS    |
| PD4006       | DNM2 | cna | gain    | BASIS    |
| PD4107       | DNM2 | cna | gain    | BASIS    |
| PD4826       | DNM2 | cna | gain    | BASIS    |
| PD4967       | DNM2 | cna | hetloss | BASIS    |
| PD5930       | DNM2 | cna | gain    | BASIS    |
| PD5935       | DNM2 | cna | gain    | BASIS    |
| PD5945       | DNM2 | cna | amp     | BASIS    |
| PD5948       | DNM2 | cna | gain    | BASIS    |
| PD7067       | DNM2 | cna | gain    | BASIS    |
| PD7215       | DNM2 | cna | amp     | BASIS    |
| PD8621       | DNM2 | cna | gain    | BASIS    |

|              |       |     |         |          |
|--------------|-------|-----|---------|----------|
| PD9702       | DNM2  | cna | gain    | BASIS    |
| TCGA-AN-A0XU | ELP2  | cna | hetloss | TCGA     |
| TCGA-AO-A0JL | ELP2  | cna | gain    | TCGA     |
| TCGA-BH-A0AW | ELP2  | cna | hetloss | TCGA     |
| TCGA-BH-A0C0 | ELP2  | cna | gain    | TCGA     |
| TCGA-C8-A12L | ELP2  | cna | gain    | TCGA     |
| TCGA-D8-A27M | ELP2  | cna | hetloss | TCGA     |
| TCGA-E2-A1L7 | ELP2  | cna | gain    | TCGA     |
| TCGA-LL-A5YP | ELP2  | cna | gain    | TCGA     |
| MB-0346      | ELP2  | cna | hetloss | METABRIC |
| PD10014      | ELP2  | cna | hetloss | BASIS    |
| PD11327      | ELP2  | cna | gain    | BASIS    |
| PD13296      | ELP2  | cna | hetloss | BASIS    |
| PD13297      | ELP2  | cna | gain    | BASIS    |
| PD13299      | ELP2  | cna | gain    | BASIS    |
| PD23574      | ELP2  | cna | hetloss | BASIS    |
| PD23578      | ELP2  | cna | gain    | BASIS    |
| PD24186      | ELP2  | cna | gain    | BASIS    |
| PD24202      | ELP2  | cna | hetloss | BASIS    |
| PD24206      | ELP2  | cna | gain    | BASIS    |
| PD24337      | ELP2  | cna | gain    | BASIS    |
| PD3905       | ELP2  | cna | gain    | BASIS    |
| PD4006       | ELP2  | cna | gain    | BASIS    |
| PD4107       | ELP2  | cna | gain    | BASIS    |
| PD4967       | ELP2  | cna | hetloss | BASIS    |
| PD5930       | ELP2  | cna | gain    | BASIS    |
| PD5945       | ELP2  | cna | gain    | BASIS    |
| PD5948       | ELP2  | cna | gain    | BASIS    |
| PD6406       | ELP2  | cna | gain    | BASIS    |
| PD7067       | ELP2  | cna | gain    | BASIS    |
| PD7215       | ELP2  | cna | gain    | BASIS    |
| PD8980       | ELP2  | cna | hetloss | BASIS    |
| PD9004       | ELP2  | cna | hetloss | BASIS    |
| PD9702       | ELP2  | cna | gain    | BASIS    |
| TCGA-A2-A25B | EPCAM | cna | hetloss | TCGA     |
| TCGA-AN-A0XU | EPCAM | cna | gain    | TCGA     |
| TCGA-AO-A0JL | EPCAM | cna | gain    | TCGA     |
| TCGA-BH-A0AW | EPCAM | cna | gain    | TCGA     |
| TCGA-BH-A0C0 | EPCAM | cna | gain    | TCGA     |
| TCGA-C8-A12L | EPCAM | cna | gain    | TCGA     |
| TCGA-D8-A27M | EPCAM | cna | gain    | TCGA     |
| TCGA-LL-A5YP | EPCAM | cna | gain    | TCGA     |
| MB-5465      | EPCAM | cna | gain    | METABRIC |
| MB-6271      | EPCAM | cna | hetloss | METABRIC |
| MB-7038      | EPCAM | cna | gain    | METABRIC |
| PD10014      | EPCAM | cna | gain    | BASIS    |
| PD13297      | EPCAM | cna | gain    | BASIS    |

|              |       |     |         |          |
|--------------|-------|-----|---------|----------|
| PD13299      | EPCAM | cna | gain    | BASIS    |
| PD23562      | EPCAM | cna | gain    | BASIS    |
| PD23578      | EPCAM | cna | gain    | BASIS    |
| PD24186      | EPCAM | cna | amp     | BASIS    |
| PD24206      | EPCAM | cna | gain    | BASIS    |
| PD24337      | EPCAM | cna | gain    | BASIS    |
| PD3890       | EPCAM | cna | hetloss | BASIS    |
| PD3905       | EPCAM | cna | gain    | BASIS    |
| PD4006       | EPCAM | cna | amp     | BASIS    |
| PD4107       | EPCAM | cna | gain    | BASIS    |
| PD5930       | EPCAM | cna | gain    | BASIS    |
| PD5935       | EPCAM | cna | gain    | BASIS    |
| PD5945       | EPCAM | cna | gain    | BASIS    |
| PD5948       | EPCAM | cna | gain    | BASIS    |
| PD7067       | EPCAM | cna | gain    | BASIS    |
| PD7215       | EPCAM | cna | gain    | BASIS    |
| PD8621       | EPCAM | cna | gain    | BASIS    |
| PD8980       | EPCAM | cna | gain    | BASIS    |
| PD9004       | EPCAM | cna | gain    | BASIS    |
| PD9702       | EPCAM | cna | gain    | BASIS    |
| TCGA-AN-A0XU | ERCC4 | cna | gain    | TCGA     |
| TCGA-AO-A0JL | ERCC4 | cna | amp     | TCGA     |
| TCGA-BH-A0AW | ERCC4 | cna | gain    | TCGA     |
| TCGA-BH-A0C0 | ERCC4 | cna | gain    | TCGA     |
| TCGA-C8-A12L | ERCC4 | cna | gain    | TCGA     |
| TCGA-E2-A1L7 | ERCC4 | cna | hetloss | TCGA     |
| TCGA-LL-A5YP | ERCC4 | cna | gain    | TCGA     |
| MB-6060      | ERCC4 | cna | gain    | METABRIC |
| MB-6098      | ERCC4 | cna | hetloss | METABRIC |
| MB-6271      | ERCC4 | cna | gain    | METABRIC |
| MB-7032      | ERCC4 | cna | gain    | METABRIC |
| MB-7038      | ERCC4 | cna | hetloss | METABRIC |
| MB-0420      | ERCC4 | cna | hetloss | METABRIC |
| PD10014      | ERCC4 | cna | hetloss | BASIS    |
| PD11327      | ERCC4 | cna | hetloss | BASIS    |
| PD11742      | ERCC4 | cna | gain    | BASIS    |
| PD13296      | ERCC4 | cna | gain    | BASIS    |
| PD13297      | ERCC4 | cna | hetloss | BASIS    |
| PD13299      | ERCC4 | cna | gain    | BASIS    |
| PD22355      | ERCC4 | cna | hetloss | BASIS    |
| PD24186      | ERCC4 | cna | gain    | BASIS    |
| PD24202      | ERCC4 | cna | hetloss | BASIS    |
| PD3905       | ERCC4 | cna | gain    | BASIS    |
| PD4005       | ERCC4 | cna | gain    | BASIS    |
| PD4107       | ERCC4 | cna | gain    | BASIS    |
| PD4826       | ERCC4 | cna | gain    | BASIS    |
| PD5935       | ERCC4 | cna | gain    | BASIS    |

|              |       |     |         |          |
|--------------|-------|-----|---------|----------|
| PD5945       | ERCC4 | cna | gain    | BASIS    |
| PD5948       | ERCC4 | cna | gain    | BASIS    |
| PD7067       | ERCC4 | cna | gain    | BASIS    |
| PD7215       | ERCC4 | cna | amp     | BASIS    |
| PD9004       | ERCC4 | cna | gain    | BASIS    |
| PD9585       | ERCC4 | cna | hetloss | BASIS    |
| TCGA-A2-A25B | ERG   | cna | hetloss | TCGA     |
| TCGA-BH-A0AW | ERG   | cna | gain    | TCGA     |
| TCGA-BH-A0C0 | ERG   | cna | hetloss | TCGA     |
| TCGA-BH-A1FU | ERG   | cna | gain    | TCGA     |
| TCGA-C8-A12L | ERG   | cna | hetloss | TCGA     |
| TCGA-D8-A27M | ERG   | cna | hetloss | TCGA     |
| TCGA-LL-A5YP | ERG   | cna | gain    | TCGA     |
| MB-0346      | ERG   | cna | gain    | METABRIC |
| MB-2827      | ERG   | cna | amp     | METABRIC |
| MB-6098      | ERG   | cna | hetloss | METABRIC |
| MB-7048      | ERG   | cna | hetloss | METABRIC |
| PD11327      | ERG   | cna | gain    | BASIS    |
| PD13296      | ERG   | cna | gain    | BASIS    |
| PD13297      | ERG   | cna | hetloss | BASIS    |
| PD13771      | ERG   | cna | gain    | BASIS    |
| PD23562      | ERG   | cna | gain    | BASIS    |
| PD23578      | ERG   | cna | gain    | BASIS    |
| PD24186      | ERG   | cna | gain    | BASIS    |
| PD24206      | ERG   | cna | gain    | BASIS    |
| PD3890       | ERG   | cna | hetloss | BASIS    |
| PD3905       | ERG   | cna | gain    | BASIS    |
| PD4107       | ERG   | cna | gain    | BASIS    |
| PD4826       | ERG   | cna | gain    | BASIS    |
| PD5930       | ERG   | cna | gain    | BASIS    |
| PD5945       | ERG   | cna | gain    | BASIS    |
| PD5948       | ERG   | cna | gain    | BASIS    |
| PD6731       | ERG   | cna | gain    | BASIS    |
| PD7067       | ERG   | cna | gain    | BASIS    |
| PD7215       | ERG   | cna | gain    | BASIS    |
| PD8621       | ERG   | cna | gain    | BASIS    |
| PD8980       | ERG   | cna | homdel  | BASIS    |
| PD9004       | ERG   | cna | gain    | BASIS    |
| PD9702       | ERG   | cna | gain    | BASIS    |
| TCGA-AN-A0XU | ESCO1 | cna | hetloss | TCGA     |
| TCGA-AO-A0JL | ESCO1 | cna | gain    | TCGA     |
| TCGA-BH-A0AW | ESCO1 | cna | gain    | TCGA     |
| TCGA-BH-A0C0 | ESCO1 | cna | gain    | TCGA     |
| TCGA-C8-A12L | ESCO1 | cna | gain    | TCGA     |
| TCGA-D8-A27M | ESCO1 | cna | hetloss | TCGA     |
| TCGA-E2-A1L7 | ESCO1 | cna | gain    | TCGA     |
| TCGA-LL-A5YP | ESCO1 | cna | amp     | TCGA     |

|              |       |     |         |          |
|--------------|-------|-----|---------|----------|
| MB-5465      | ESCO1 | cna | hetloss | METABRIC |
| PD10014      | ESCO1 | cna | gain    | BASIS    |
| PD13296      | ESCO1 | cna | hetloss | BASIS    |
| PD13297      | ESCO1 | cna | gain    | BASIS    |
| PD13299      | ESCO1 | cna | gain    | BASIS    |
| PD23562      | ESCO1 | cna | gain    | BASIS    |
| PD23574      | ESCO1 | cna | gain    | BASIS    |
| PD24186      | ESCO1 | cna | gain    | BASIS    |
| PD24202      | ESCO1 | cna | hetloss | BASIS    |
| PD24206      | ESCO1 | cna | gain    | BASIS    |
| PD24337      | ESCO1 | cna | gain    | BASIS    |
| PD3890       | ESCO1 | cna | gain    | BASIS    |
| PD3905       | ESCO1 | cna | gain    | BASIS    |
| PD4006       | ESCO1 | cna | gain    | BASIS    |
| PD4107       | ESCO1 | cna | gain    | BASIS    |
| PD4967       | ESCO1 | cna | hetloss | BASIS    |
| PD5930       | ESCO1 | cna | gain    | BASIS    |
| PD5935       | ESCO1 | cna | gain    | BASIS    |
| PD5945       | ESCO1 | cna | amp     | BASIS    |
| PD5948       | ESCO1 | cna | gain    | BASIS    |
| PD7067       | ESCO1 | cna | gain    | BASIS    |
| PD7215       | ESCO1 | cna | gain    | BASIS    |
| PD8980       | ESCO1 | cna | hetloss | BASIS    |
| PD9004       | ESCO1 | cna | gain    | BASIS    |
| PD9702       | ESCO1 | cna | gain    | BASIS    |
| TCGA-A2-A25B | ETV1  | cna | gain    | TCGA     |
| TCGA-BH-A0AW | ETV1  | cna | gain    | TCGA     |
| TCGA-BH-A0C0 | ETV1  | cna | hetloss | TCGA     |
| TCGA-C8-A12L | ETV1  | cna | gain    | TCGA     |
| TCGA-E2-A1L7 | ETV1  | cna | hetloss | TCGA     |
| TCGA-LL-A5YP | ETV1  | cna | hetloss | TCGA     |
| MB-0346      | ETV1  | cna | hetloss | METABRIC |
| MB-5070      | ETV1  | cna | hetloss | METABRIC |
| MB-5107      | ETV1  | cna | gain    | METABRIC |
| MB-6098      | ETV1  | cna | hetloss | METABRIC |
| MB-0420      | ETV1  | cna | hetloss | METABRIC |
| PD11327      | ETV1  | cna | gain    | BASIS    |
| PD13296      | ETV1  | cna | gain    | BASIS    |
| PD13297      | ETV1  | cna | hetloss | BASIS    |
| PD13771      | ETV1  | cna | gain    | BASIS    |
| PD22355      | ETV1  | cna | hetloss | BASIS    |
| PD23574      | ETV1  | cna | gain    | BASIS    |
| PD24206      | ETV1  | cna | gain    | BASIS    |
| PD24337      | ETV1  | cna | hetloss | BASIS    |
| PD3905       | ETV1  | cna | gain    | BASIS    |
| PD4006       | ETV1  | cna | gain    | BASIS    |
| PD4107       | ETV1  | cna | amp     | BASIS    |



|              |       |     |         |          |
|--------------|-------|-----|---------|----------|
| PD4826       | ETV1  | cna | gain    | BASIS    |
| PD5935       | ETV1  | cna | gain    | BASIS    |
| PD5945       | ETV1  | cna | gain    | BASIS    |
| PD6406       | ETV1  | cna | hetloss | BASIS    |
| PD6413       | ETV1  | cna | gain    | BASIS    |
| PD7067       | ETV1  | cna | gain    | BASIS    |
| PD7215       | ETV1  | cna | gain    | BASIS    |
| PD8621       | ETV1  | cna | gain    | BASIS    |
| PD8980       | ETV1  | cna | hetloss | BASIS    |
| PD9004       | ETV1  | cna | gain    | BASIS    |
| PD9702       | ETV1  | cna | gain    | BASIS    |
| TCGA-A2-A25B | EWSR1 | cna | hetloss | TCGA     |
| TCGA-BH-A0C0 | EWSR1 | cna | gain    | TCGA     |
| TCGA-BH-A1FU | EWSR1 | cna | gain    | TCGA     |
| TCGA-C8-A12L | EWSR1 | cna | gain    | TCGA     |
| TCGA-D8-A27M | EWSR1 | cna | gain    | TCGA     |
| TCGA-E9-A1NC | EWSR1 | cna | gain    | TCGA     |
| TCGA-LL-A5YP | EWSR1 | cna | gain    | TCGA     |
| MB-0346      | EWSR1 | cna | gain    | METABRIC |
| MB-6060      | EWSR1 | cna | gain    | METABRIC |
| MB-6098      | EWSR1 | cna | gain    | METABRIC |
| PD11327      | EWSR1 | cna | gain    | BASIS    |
| PD13296      | EWSR1 | cna | gain    | BASIS    |
| PD13297      | EWSR1 | cna | gain    | BASIS    |
| PD13771      | EWSR1 | cna | gain    | BASIS    |
| PD14442      | EWSR1 | cna | hetloss | BASIS    |
| PD23562      | EWSR1 | cna | gain    | BASIS    |
| PD23574      | EWSR1 | cna | gain    | BASIS    |
| PD24206      | EWSR1 | cna | hetloss | BASIS    |
| PD3905       | EWSR1 | cna | gain    | BASIS    |
| PD4006       | EWSR1 | cna | gain    | BASIS    |
| PD4107       | EWSR1 | cna | gain    | BASIS    |
| PD4826       | EWSR1 | cna | gain    | BASIS    |
| PD4967       | EWSR1 | cna | hetloss | BASIS    |
| PD5930       | EWSR1 | cna | gain    | BASIS    |
| PD5935       | EWSR1 | cna | gain    | BASIS    |
| PD5945       | EWSR1 | cna | amp     | BASIS    |
| PD5948       | EWSR1 | cna | gain    | BASIS    |
| PD6731       | EWSR1 | cna | hetloss | BASIS    |
| PD7067       | EWSR1 | cna | gain    | BASIS    |
| PD7215       | EWSR1 | cna | gain    | BASIS    |
| PD8621       | EWSR1 | cna | gain    | BASIS    |
| PD9004       | EWSR1 | cna | gain    | BASIS    |
| PD9702       | EWSR1 | cna | gain    | BASIS    |
| TCGA-A2-A25B | FAF1  | cna | gain    | TCGA     |
| TCGA-AN-A0XU | FAF1  | cna | gain    | TCGA     |
| TCGA-AO-A0JL | FAF1  | cna | hetloss | TCGA     |

|              |        |     |         |          |
|--------------|--------|-----|---------|----------|
| TCGA-BH-A0AW | FAF1   | cna | gain    | TCGA     |
| TCGA-BH-A0C0 | FAF1   | cna | hetloss | TCGA     |
| TCGA-BH-A1FU | FAF1   | cna | gain    | TCGA     |
| TCGA-D8-A27M | FAF1   | cna | gain    | TCGA     |
| TCGA-E2-A1L7 | FAF1   | cna | gain    | TCGA     |
| TCGA-LL-A5YP | FAF1   | cna | hetloss | TCGA     |
| MB-0346      | FAF1   | cna | hetloss | METABRIC |
| MB-6060      | FAF1   | cna | hetloss | METABRIC |
| MB-6098      | FAF1   | cna | gain    | METABRIC |
| MB-7038      | FAF1   | cna | gain    | METABRIC |
| MB-0420      | FAF1   | cna | hetloss | METABRIC |
| PD11742      | FAF1   | cna | hetloss | BASIS    |
| PD13299      | FAF1   | cna | gain    | BASIS    |
| PD24186      | FAF1   | cna | amp     | BASIS    |
| PD24206      | FAF1   | cna | gain    | BASIS    |
| PD3905       | FAF1   | cna | gain    | BASIS    |
| PD4005       | FAF1   | cna | hetloss | BASIS    |
| PD4006       | FAF1   | cna | gain    | BASIS    |
| PD4107       | FAF1   | cna | gain    | BASIS    |
| PD4826       | FAF1   | cna | gain    | BASIS    |
| PD5930       | FAF1   | cna | gain    | BASIS    |
| PD5935       | FAF1   | cna | gain    | BASIS    |
| PD5945       | FAF1   | cna | amp     | BASIS    |
| PD5948       | FAF1   | cna | gain    | BASIS    |
| PD6413       | FAF1   | cna | hetloss | BASIS    |
| PD7067       | FAF1   | cna | gain    | BASIS    |
| PD7215       | FAF1   | cna | gain    | BASIS    |
| PD8621       | FAF1   | cna | gain    | BASIS    |
| PD9004       | FAF1   | cna | gain    | BASIS    |
| PD9702       | FAF1   | cna | gain    | BASIS    |
| TCGA-A2-A25B | FBXO11 | cna | hetloss | TCGA     |
| TCGA-AN-A0XU | FBXO11 | cna | gain    | TCGA     |
| TCGA-AO-A0JL | FBXO11 | cna | gain    | TCGA     |
| TCGA-BH-A0AW | FBXO11 | cna | gain    | TCGA     |
| TCGA-BH-A0C0 | FBXO11 | cna | gain    | TCGA     |
| TCGA-C8-A12L | FBXO11 | cna | gain    | TCGA     |
| TCGA-D8-A27M | FBXO11 | cna | gain    | TCGA     |
| TCGA-LL-A5YP | FBXO11 | cna | gain    | TCGA     |
| MB-5465      | FBXO11 | cna | gain    | METABRIC |
| MB-6271      | FBXO11 | cna | hetloss | METABRIC |
| MB-7038      | FBXO11 | cna | gain    | METABRIC |
| PD10014      | FBXO11 | cna | gain    | BASIS    |
| PD13297      | FBXO11 | cna | gain    | BASIS    |
| PD13299      | FBXO11 | cna | gain    | BASIS    |
| PD23562      | FBXO11 | cna | gain    | BASIS    |
| PD23578      | FBXO11 | cna | gain    | BASIS    |
| PD24186      | FBXO11 | cna | amp     | BASIS    |

|              |        |     |         |          |
|--------------|--------|-----|---------|----------|
| PD24206      | FBXO11 | cna | hetloss | BASIS    |
| PD24337      | FBXO11 | cna | gain    | BASIS    |
| PD3890       | FBXO11 | cna | hetloss | BASIS    |
| PD3905       | FBXO11 | cna | gain    | BASIS    |
| PD4006       | FBXO11 | cna | amp     | BASIS    |
| PD4107       | FBXO11 | cna | gain    | BASIS    |
| PD5930       | FBXO11 | cna | gain    | BASIS    |
| PD5935       | FBXO11 | cna | gain    | BASIS    |
| PD5945       | FBXO11 | cna | gain    | BASIS    |
| PD5948       | FBXO11 | cna | gain    | BASIS    |
| PD7067       | FBXO11 | cna | gain    | BASIS    |
| PD7215       | FBXO11 | cna | gain    | BASIS    |
| PD8621       | FBXO11 | cna | gain    | BASIS    |
| PD8980       | FBXO11 | cna | gain    | BASIS    |
| PD9004       | FBXO11 | cna | gain    | BASIS    |
| PD9702       | FBXO11 | cna | gain    | BASIS    |
| TCGA-A2-A25B | FGFR2  | cna | hetloss | TCGA     |
| TCGA-AN-A0XU | FGFR2  | cna | hetloss | TCGA     |
| TCGA-AO-A0JL | FGFR2  | cna | hetloss | TCGA     |
| TCGA-C8-A12L | FGFR2  | cna | hetloss | TCGA     |
| TCGA-E2-A1L7 | FGFR2  | cna | hetloss | TCGA     |
| TCGA-E9-A1NC | FGFR2  | cna | hetloss | TCGA     |
| TCGA-LL-A5YP | FGFR2  | cna | gain    | TCGA     |
| MB-0346      | FGFR2  | cna | hetloss | METABRIC |
| MB-2827      | FGFR2  | cna | hetloss | METABRIC |
| MB-5070      | FGFR2  | cna | hetloss | METABRIC |
| MB-5465      | FGFR2  | cna | hetloss | METABRIC |
| MB-6098      | FGFR2  | cna | hetloss | METABRIC |
| MB-7038      | FGFR2  | cna | hetloss | METABRIC |
| MB-0420      | FGFR2  | cna | hetloss | METABRIC |
| PD10014      | FGFR2  | cna | gain    | BASIS    |
| PD11742      | FGFR2  | cna | hetloss | BASIS    |
| PD23562      | FGFR2  | cna | gain    | BASIS    |
| PD23578      | FGFR2  | cna | hetloss | BASIS    |
| PD24186      | FGFR2  | cna | gain    | BASIS    |
| PD24337      | FGFR2  | cna | hetloss | BASIS    |
| PD3890       | FGFR2  | cna | hetloss | BASIS    |
| PD3905       | FGFR2  | cna | gain    | BASIS    |
| PD4006       | FGFR2  | cna | gain    | BASIS    |
| PD4107       | FGFR2  | cna | gain    | BASIS    |
| PD5935       | FGFR2  | cna | gain    | BASIS    |
| PD5945       | FGFR2  | cna | gain    | BASIS    |
| PD5948       | FGFR2  | cna | amp     | BASIS    |
| PD6731       | FGFR2  | cna | hetloss | BASIS    |
| PD7067       | FGFR2  | cna | gain    | BASIS    |
| PD7215       | FGFR2  | cna | gain    | BASIS    |
| PD8621       | FGFR2  | cna | gain    | BASIS    |

|              |        |     |         |          |
|--------------|--------|-----|---------|----------|
| PD8980       | FGFR2  | cna | hetloss | BASIS    |
| PD9702       | FGFR2  | cna | gain    | BASIS    |
| TCGA-A2-A25B | FLT4   | cna | hetloss | TCGA     |
| TCGA-AN-A0XU | FLT4   | cna | hetloss | TCGA     |
| TCGA-AO-A0JL | FLT4   | cna | hetloss | TCGA     |
| TCGA-BH-A0C0 | FLT4   | cna | hetloss | TCGA     |
| TCGA-BH-A1FU | FLT4   | cna | amp     | TCGA     |
| TCGA-C8-A12L | FLT4   | cna | hetloss | TCGA     |
| TCGA-D8-A27M | FLT4   | cna | hetloss | TCGA     |
| TCGA-E2-A1L7 | FLT4   | cna | hetloss | TCGA     |
| MB-5070      | FLT4   | cna | hetloss | METABRIC |
| MB-5465      | FLT4   | cna | gain    | METABRIC |
| MB-6098      | FLT4   | cna | hetloss | METABRIC |
| MB-7048      | FLT4   | cna | gain    | METABRIC |
| PD10014      | FLT4   | cna | hetloss | BASIS    |
| PD13296      | FLT4   | cna | hetloss | BASIS    |
| PD13297      | FLT4   | cna | hetloss | BASIS    |
| PD13771      | FLT4   | cna | hetloss | BASIS    |
| PD22355      | FLT4   | cna | hetloss | BASIS    |
| PD23562      | FLT4   | cna | amp     | BASIS    |
| PD23574      | FLT4   | cna | gain    | BASIS    |
| PD23578      | FLT4   | cna | hetloss | BASIS    |
| PD24186      | FLT4   | cna | gain    | BASIS    |
| PD24206      | FLT4   | cna | gain    | BASIS    |
| PD3905       | FLT4   | cna | gain    | BASIS    |
| PD4005       | FLT4   | cna | hetloss | BASIS    |
| PD4006       | FLT4   | cna | gain    | BASIS    |
| PD4107       | FLT4   | cna | hetloss | BASIS    |
| PD4826       | FLT4   | cna | gain    | BASIS    |
| PD5945       | FLT4   | cna | amp     | BASIS    |
| PD5948       | FLT4   | cna | hetloss | BASIS    |
| PD7067       | FLT4   | cna | gain    | BASIS    |
| PD7215       | FLT4   | cna | amp     | BASIS    |
| PD8980       | FLT4   | cna | gain    | BASIS    |
| PD9702       | FLT4   | cna | gain    | BASIS    |
| TCGA-A2-A25B | GPR124 | cna | hetloss | TCGA     |
| TCGA-AN-A0XU | GPR124 | cna | hetloss | TCGA     |
| TCGA-AO-A0JL | GPR124 | cna | gain    | TCGA     |
| TCGA-BH-A0C0 | GPR124 | cna | hetloss | TCGA     |
| TCGA-BH-A1FU | GPR124 | cna | homdel  | TCGA     |
| TCGA-D8-A27M | GPR124 | cna | hetloss | TCGA     |
| TCGA-E2-A1L7 | GPR124 | cna | hetloss | TCGA     |
| TCGA-LL-A5YP | GPR124 | cna | hetloss | TCGA     |
| PD10014      | GPR124 | cna | hetloss | BASIS    |
| PD11327      | GPR124 | cna | homdel  | BASIS    |
| PD13296      | GPR124 | cna | hetloss | BASIS    |
| PD13299      | GPR124 | cna | gain    | BASIS    |

|              |        |     |         |          |
|--------------|--------|-----|---------|----------|
| PD13771      | GPR124 | cna | hetloss | BASIS    |
| PD14442      | GPR124 | cna | hetloss | BASIS    |
| PD22355      | GPR124 | cna | hetloss | BASIS    |
| PD23562      | GPR124 | cna | gain    | BASIS    |
| PD23578      | GPR124 | cna | hetloss | BASIS    |
| PD24186      | GPR124 | cna | gain    | BASIS    |
| PD24202      | GPR124 | cna | hetloss | BASIS    |
| PD24206      | GPR124 | cna | amp     | BASIS    |
| PD24337      | GPR124 | cna | hetloss | BASIS    |
| PD3905       | GPR124 | cna | gain    | BASIS    |
| PD4006       | GPR124 | cna | gain    | BASIS    |
| PD4107       | GPR124 | cna | gain    | BASIS    |
| PD4826       | GPR124 | cna | hetloss | BASIS    |
| PD5935       | GPR124 | cna | gain    | BASIS    |
| PD5945       | GPR124 | cna | gain    | BASIS    |
| PD7067       | GPR124 | cna | gain    | BASIS    |
| PD7215       | GPR124 | cna | amp     | BASIS    |
| PD8980       | GPR124 | cna | amp     | BASIS    |
| PD9004       | GPR124 | cna | gain    | BASIS    |
| PD9585       | GPR124 | cna | hetloss | BASIS    |
| PD9702       | GPR124 | cna | gain    | BASIS    |
| TCGA-A2-A25B | ICK    | cna | gain    | TCGA     |
| TCGA-AO-A0JL | ICK    | cna | hetloss | TCGA     |
| TCGA-BH-A0AW | ICK    | cna | gain    | TCGA     |
| TCGA-BH-A0C0 | ICK    | cna | hetloss | TCGA     |
| TCGA-C8-A12L | ICK    | cna | gain    | TCGA     |
| TCGA-D8-A27M | ICK    | cna | gain    | TCGA     |
| MB-0346      | ICK    | cna | gain    | METABRIC |
| MB-5070      | ICK    | cna | amp     | METABRIC |
| MB-6098      | ICK    | cna | hetloss | METABRIC |
| MB-7032      | ICK    | cna | hetloss | METABRIC |
| MB-7038      | ICK    | cna | hetloss | METABRIC |
| PD11327      | ICK    | cna | amp     | BASIS    |
| PD13299      | ICK    | cna | gain    | BASIS    |
| PD22355      | ICK    | cna | gain    | BASIS    |
| PD23562      | ICK    | cna | gain    | BASIS    |
| PD23578      | ICK    | cna | gain    | BASIS    |
| PD24186      | ICK    | cna | gain    | BASIS    |
| PD24206      | ICK    | cna | gain    | BASIS    |
| PD3905       | ICK    | cna | gain    | BASIS    |
| PD4006       | ICK    | cna | gain    | BASIS    |
| PD4107       | ICK    | cna | gain    | BASIS    |
| PD4826       | ICK    | cna | gain    | BASIS    |
| PD5930       | ICK    | cna | gain    | BASIS    |
| PD5935       | ICK    | cna | gain    | BASIS    |
| PD5945       | ICK    | cna | amp     | BASIS    |
| PD5948       | ICK    | cna | gain    | BASIS    |

|              |        |     |         |          |
|--------------|--------|-----|---------|----------|
| PD6406       | ICK    | cna | hetloss | BASIS    |
| PD7067       | ICK    | cna | amp     | BASIS    |
| PD7215       | ICK    | cna | gain    | BASIS    |
| PD8621       | ICK    | cna | gain    | BASIS    |
| PD9004       | ICK    | cna | gain    | BASIS    |
| PD9585       | ICK    | cna | gain    | BASIS    |
| PD9702       | ICK    | cna | gain    | BASIS    |
| TCGA-AO-A0JL | INPP5D | cna | gain    | TCGA     |
| TCGA-BH-A0AW | INPP5D | cna | hetloss | TCGA     |
| TCGA-C8-A12L | INPP5D | cna | hetloss | TCGA     |
| TCGA-D8-A27M | INPP5D | cna | gain    | TCGA     |
| TCGA-E2-A1L7 | INPP5D | cna | hetloss | TCGA     |
| TCGA-E9-A1NC | INPP5D | cna | hetloss | TCGA     |
| MB-2827      | INPP5D | cna | hetloss | METABRIC |
| MB-6060      | INPP5D | cna | hetloss | METABRIC |
| MB-6098      | INPP5D | cna | hetloss | METABRIC |
| MB-6271      | INPP5D | cna | hetloss | METABRIC |
| MB-7038      | INPP5D | cna | gain    | METABRIC |
| MB-7048      | INPP5D | cna | hetloss | METABRIC |
| PD10014      | INPP5D | cna | gain    | BASIS    |
| PD11327      | INPP5D | cna | gain    | BASIS    |
| PD11742      | INPP5D | cna | hetloss | BASIS    |
| PD13296      | INPP5D | cna | hetloss | BASIS    |
| PD13297      | INPP5D | cna | hetloss | BASIS    |
| PD23578      | INPP5D | cna | hetloss | BASIS    |
| PD24186      | INPP5D | cna | gain    | BASIS    |
| PD24206      | INPP5D | cna | gain    | BASIS    |
| PD3890       | INPP5D | cna | hetloss | BASIS    |
| PD4006       | INPP5D | cna | gain    | BASIS    |
| PD4967       | INPP5D | cna | hetloss | BASIS    |
| PD5935       | INPP5D | cna | gain    | BASIS    |
| PD5945       | INPP5D | cna | gain    | BASIS    |
| PD5948       | INPP5D | cna | gain    | BASIS    |
| PD6406       | INPP5D | cna | hetloss | BASIS    |
| PD6413       | INPP5D | cna | hetloss | BASIS    |
| PD6731       | INPP5D | cna | hetloss | BASIS    |
| PD7067       | INPP5D | cna | gain    | BASIS    |
| PD7215       | INPP5D | cna | gain    | BASIS    |
| PD8980       | INPP5D | cna | hetloss | BASIS    |
| PD9585       | INPP5D | cna | hetloss | BASIS    |
| TCGA-AO-A0JL | JAK3   | cna | gain    | TCGA     |
| TCGA-BH-A0C0 | JAK3   | cna | gain    | TCGA     |
| TCGA-BH-A1FU | JAK3   | cna | hetloss | TCGA     |
| TCGA-C8-A12L | JAK3   | cna | gain    | TCGA     |
| TCGA-D8-A27M | JAK3   | cna | hetloss | TCGA     |
| TCGA-EW-A10X | JAK3   | cna | hetloss | TCGA     |
| TCGA-LL-A5YP | JAK3   | cna | hetloss | TCGA     |

|              |      |     |         |          |
|--------------|------|-----|---------|----------|
| MB-0346      | JAK3 | cna | hetloss | METABRIC |
| MB-2827      | JAK3 | cna | hetloss | METABRIC |
| MB-6060      | JAK3 | cna | gain    | METABRIC |
| MB-6098      | JAK3 | cna | hetloss | METABRIC |
| MB-0420      | JAK3 | cna | hetloss | METABRIC |
| MTS-T0064    | JAK3 | cna | amp     | METABRIC |
| PD13299      | JAK3 | cna | gain    | BASIS    |
| PD14442      | JAK3 | cna | hetloss | BASIS    |
| PD22355      | JAK3 | cna | gain    | BASIS    |
| PD23562      | JAK3 | cna | gain    | BASIS    |
| PD23574      | JAK3 | cna | gain    | BASIS    |
| PD24186      | JAK3 | cna | gain    | BASIS    |
| PD24206      | JAK3 | cna | hetloss | BASIS    |
| PD3890       | JAK3 | cna | hetloss | BASIS    |
| PD3905       | JAK3 | cna | gain    | BASIS    |
| PD4006       | JAK3 | cna | amp     | BASIS    |
| PD4107       | JAK3 | cna | gain    | BASIS    |
| PD4826       | JAK3 | cna | gain    | BASIS    |
| PD4967       | JAK3 | cna | hetloss | BASIS    |
| PD5930       | JAK3 | cna | gain    | BASIS    |
| PD5935       | JAK3 | cna | gain    | BASIS    |
| PD5945       | JAK3 | cna | amp     | BASIS    |
| PD5948       | JAK3 | cna | gain    | BASIS    |
| PD7067       | JAK3 | cna | gain    | BASIS    |
| PD7215       | JAK3 | cna | amp     | BASIS    |
| PD9702       | JAK3 | cna | gain    | BASIS    |
| TCGA-AO-A0JL | KLK2 | cna | hetloss | TCGA     |
| TCGA-BH-A0AW | KLK2 | cna | gain    | TCGA     |
| TCGA-BH-A0C0 | KLK2 | cna | hetloss | TCGA     |
| TCGA-BH-A1FU | KLK2 | cna | hetloss | TCGA     |
| TCGA-D8-A27M | KLK2 | cna | hetloss | TCGA     |
| TCGA-E2-A1L7 | KLK2 | cna | hetloss | TCGA     |
| TCGA-EW-A10X | KLK2 | cna | hetloss | TCGA     |
| TCGA-LL-A5YP | KLK2 | cna | gain    | TCGA     |
| MB-0346      | KLK2 | cna | hetloss | METABRIC |
| MB-6098      | KLK2 | cna | hetloss | METABRIC |
| MB-7048      | KLK2 | cna | gain    | METABRIC |
| PD11327      | KLK2 | cna | gain    | BASIS    |
| PD13296      | KLK2 | cna | gain    | BASIS    |
| PD13299      | KLK2 | cna | gain    | BASIS    |
| PD13771      | KLK2 | cna | hetloss | BASIS    |
| PD23562      | KLK2 | cna | gain    | BASIS    |
| PD23574      | KLK2 | cna | gain    | BASIS    |
| PD24186      | KLK2 | cna | gain    | BASIS    |
| PD24206      | KLK2 | cna | hetloss | BASIS    |
| PD24337      | KLK2 | cna | hetloss | BASIS    |
| PD3890       | KLK2 | cna | hetloss | BASIS    |

|              |        |     |         |          |
|--------------|--------|-----|---------|----------|
| PD3905       | KLK2   | cna | gain    | BASIS    |
| PD4006       | KLK2   | cna | gain    | BASIS    |
| PD4826       | KLK2   | cna | gain    | BASIS    |
| PD5935       | KLK2   | cna | gain    | BASIS    |
| PD5945       | KLK2   | cna | gain    | BASIS    |
| PD5948       | KLK2   | cna | gain    | BASIS    |
| PD6406       | KLK2   | cna | gain    | BASIS    |
| PD7067       | KLK2   | cna | gain    | BASIS    |
| PD7215       | KLK2   | cna | gain    | BASIS    |
| PD8621       | KLK2   | cna | gain    | BASIS    |
| PD8980       | KLK2   | cna | hetloss | BASIS    |
| PD9585       | KLK2   | cna | gain    | BASIS    |
| TCGA-A2-A25B | MAFB   | cna | gain    | TCGA     |
| TCGA-AO-A0JL | MAFB   | cna | gain    | TCGA     |
| TCGA-BH-A0AW | MAFB   | cna | gain    | TCGA     |
| TCGA-BH-A0C0 | MAFB   | cna | gain    | TCGA     |
| TCGA-C8-A12L | MAFB   | cna | gain    | TCGA     |
| TCGA-D8-A27M | MAFB   | cna | gain    | TCGA     |
| TCGA-E2-A1L7 | MAFB   | cna | gain    | TCGA     |
| TCGA-E9-A1NC | MAFB   | cna | hetloss | TCGA     |
| TCGA-LL-A5YP | MAFB   | cna | hetloss | TCGA     |
| MB-0346      | MAFB   | cna | gain    | METABRIC |
| MB-5107      | MAFB   | cna | gain    | METABRIC |
| MB-6060      | MAFB   | cna | gain    | METABRIC |
| MB-6098      | MAFB   | cna | hetloss | METABRIC |
| PD13296      | MAFB   | cna | hetloss | BASIS    |
| PD13297      | MAFB   | cna | hetloss | BASIS    |
| PD13771      | MAFB   | cna | gain    | BASIS    |
| PD22355      | MAFB   | cna | hetloss | BASIS    |
| PD23578      | MAFB   | cna | hetloss | BASIS    |
| PD24186      | MAFB   | cna | gain    | BASIS    |
| PD24202      | MAFB   | cna | hetloss | BASIS    |
| PD24206      | MAFB   | cna | gain    | BASIS    |
| PD3905       | MAFB   | cna | gain    | BASIS    |
| PD4005       | MAFB   | cna | hetloss | BASIS    |
| PD4826       | MAFB   | cna | gain    | BASIS    |
| PD5935       | MAFB   | cna | gain    | BASIS    |
| PD5945       | MAFB   | cna | amp     | BASIS    |
| PD5948       | MAFB   | cna | gain    | BASIS    |
| PD6731       | MAFB   | cna | hetloss | BASIS    |
| PD7067       | MAFB   | cna | gain    | BASIS    |
| PD7215       | MAFB   | cna | gain    | BASIS    |
| PD8621       | MAFB   | cna | hetloss | BASIS    |
| PD8980       | MAFB   | cna | gain    | BASIS    |
| PD9004       | MAFB   | cna | gain    | BASIS    |
| TCGA-AN-A0XU | MAP2K1 | cna | hetloss | TCGA     |
| TCGA-AO-A0JL | MAP2K1 | cna | hetloss | TCGA     |



|              |        |     |         |          |
|--------------|--------|-----|---------|----------|
| TCGA-BH-A0AW | MAP2K1 | cna | hetloss | TCGA     |
| TCGA-BH-A0C0 | MAP2K1 | cna | hetloss | TCGA     |
| TCGA-D8-A27M | MAP2K1 | cna | hetloss | TCGA     |
| TCGA-E2-A1L7 | MAP2K1 | cna | gain    | TCGA     |
| TCGA-LL-A5YP | MAP2K1 | cna | gain    | TCGA     |
| MB-0346      | MAP2K1 | cna | hetloss | METABRIC |
| MB-2827      | MAP2K1 | cna | hetloss | METABRIC |
| MB-6060      | MAP2K1 | cna | gain    | METABRIC |
| MB-7038      | MAP2K1 | cna | gain    | METABRIC |
| MB-7048      | MAP2K1 | cna | hetloss | METABRIC |
| PD11742      | MAP2K1 | cna | hetloss | BASIS    |
| PD13296      | MAP2K1 | cna | hetloss | BASIS    |
| PD13297      | MAP2K1 | cna | hetloss | BASIS    |
| PD22355      | MAP2K1 | cna | hetloss | BASIS    |
| PD23562      | MAP2K1 | cna | gain    | BASIS    |
| PD23574      | MAP2K1 | cna | gain    | BASIS    |
| PD23578      | MAP2K1 | cna | gain    | BASIS    |
| PD24202      | MAP2K1 | cna | hetloss | BASIS    |
| PD24206      | MAP2K1 | cna | gain    | BASIS    |
| PD3890       | MAP2K1 | cna | hetloss | BASIS    |
| PD3905       | MAP2K1 | cna | gain    | BASIS    |
| PD4006       | MAP2K1 | cna | gain    | BASIS    |
| PD5945       | MAP2K1 | cna | gain    | BASIS    |
| PD5948       | MAP2K1 | cna | gain    | BASIS    |
| PD6406       | MAP2K1 | cna | hetloss | BASIS    |
| PD6413       | MAP2K1 | cna | gain    | BASIS    |
| PD7067       | MAP2K1 | cna | gain    | BASIS    |
| PD7215       | MAP2K1 | cna | gain    | BASIS    |
| PD8980       | MAP2K1 | cna | gain    | BASIS    |
| PD9585       | MAP2K1 | cna | hetloss | BASIS    |
| PD9702       | MAP2K1 | cna | gain    | BASIS    |
| TCGA-AN-A0XU | MLH1   | cna | hetloss | TCGA     |
| TCGA-BH-A0C0 | MLH1   | cna | hetloss | TCGA     |
| TCGA-BH-A18R | MLH1   | cna | amp     | TCGA     |
| TCGA-BH-A1FU | MLH1   | cna | hetloss | TCGA     |
| TCGA-C8-A12L | MLH1   | cna | hetloss | TCGA     |
| TCGA-D8-A27M | MLH1   | cna | hetloss | TCGA     |
| TCGA-E9-A1NC | MLH1   | cna | hetloss | TCGA     |
| TCGA-LL-A5YP | MLH1   | cna | amp     | TCGA     |
| MB-2827      | MLH1   | cna | hetloss | METABRIC |
| MB-7038      | MLH1   | cna | hetloss | METABRIC |
| MB-7048      | MLH1   | cna | hetloss | METABRIC |
| MB-0420      | MLH1   | cna | hetloss | METABRIC |
| PD10014      | MLH1   | cna | hetloss | BASIS    |
| PD11742      | MLH1   | cna | gain    | BASIS    |
| PD13296      | MLH1   | cna | gain    | BASIS    |
| PD13299      | MLH1   | cna | gain    | BASIS    |

|              |      |     |         |          |
|--------------|------|-----|---------|----------|
| PD13771      | MLH1 | cna | gain    | BASIS    |
| PD22355      | MLH1 | cna | hetloss | BASIS    |
| PD23561      | MLH1 | cna | hetloss | BASIS    |
| PD23574      | MLH1 | cna | gain    | BASIS    |
| PD23578      | MLH1 | cna | hetloss | BASIS    |
| PD24202      | MLH1 | cna | hetloss | BASIS    |
| PD24206      | MLH1 | cna | gain    | BASIS    |
| PD3890       | MLH1 | cna | hetloss | BASIS    |
| PD3905       | MLH1 | cna | gain    | BASIS    |
| PD4826       | MLH1 | cna | gain    | BASIS    |
| PD5945       | MLH1 | cna | gain    | BASIS    |
| PD6406       | MLH1 | cna | hetloss | BASIS    |
| PD6731       | MLH1 | cna | hetloss | BASIS    |
| PD7067       | MLH1 | cna | gain    | BASIS    |
| PD8980       | MLH1 | cna | gain    | BASIS    |
| PD9585       | MLH1 | cna | hetloss | BASIS    |
| PD9702       | MLH1 | cna | gain    | BASIS    |
| TCGA-A2-A25B | MSH2 | cna | hetloss | TCGA     |
| TCGA-AN-A0XU | MSH2 | cna | gain    | TCGA     |
| TCGA-AO-A0JL | MSH2 | cna | gain    | TCGA     |
| TCGA-BH-A0AW | MSH2 | cna | gain    | TCGA     |
| TCGA-BH-A0C0 | MSH2 | cna | gain    | TCGA     |
| TCGA-C8-A12L | MSH2 | cna | gain    | TCGA     |
| TCGA-D8-A27M | MSH2 | cna | gain    | TCGA     |
| TCGA-LL-A5YP | MSH2 | cna | gain    | TCGA     |
| MB-5465      | MSH2 | cna | gain    | METABRIC |
| MB-6271      | MSH2 | cna | hetloss | METABRIC |
| MB-7038      | MSH2 | cna | gain    | METABRIC |
| PD10014      | MSH2 | cna | gain    | BASIS    |
| PD13297      | MSH2 | cna | gain    | BASIS    |
| PD13299      | MSH2 | cna | gain    | BASIS    |
| PD23562      | MSH2 | cna | gain    | BASIS    |
| PD23578      | MSH2 | cna | gain    | BASIS    |
| PD24186      | MSH2 | cna | amp     | BASIS    |
| PD24206      | MSH2 | cna | gain    | BASIS    |
| PD24337      | MSH2 | cna | gain    | BASIS    |
| PD3890       | MSH2 | cna | hetloss | BASIS    |
| PD3905       | MSH2 | cna | gain    | BASIS    |
| PD4006       | MSH2 | cna | amp     | BASIS    |
| PD4107       | MSH2 | cna | gain    | BASIS    |
| PD5930       | MSH2 | cna | gain    | BASIS    |
| PD5935       | MSH2 | cna | gain    | BASIS    |
| PD5945       | MSH2 | cna | gain    | BASIS    |
| PD5948       | MSH2 | cna | gain    | BASIS    |
| PD7067       | MSH2 | cna | gain    | BASIS    |
| PD7215       | MSH2 | cna | gain    | BASIS    |
| PD8621       | MSH2 | cna | gain    | BASIS    |

|              |      |     |         |          |
|--------------|------|-----|---------|----------|
| PD8980       | MSH2 | cna | gain    | BASIS    |
| PD9004       | MSH2 | cna | gain    | BASIS    |
| PD9702       | MSH2 | cna | gain    | BASIS    |
| TCGA-A2-A25B | MSH6 | cna | hetloss | TCGA     |
| TCGA-AN-A0XU | MSH6 | cna | gain    | TCGA     |
| TCGA-AO-A0JL | MSH6 | cna | gain    | TCGA     |
| TCGA-BH-A0AW | MSH6 | cna | gain    | TCGA     |
| TCGA-BH-A0C0 | MSH6 | cna | gain    | TCGA     |
| TCGA-C8-A12L | MSH6 | cna | gain    | TCGA     |
| TCGA-D8-A27M | MSH6 | cna | gain    | TCGA     |
| TCGA-LL-A5YP | MSH6 | cna | gain    | TCGA     |
| MB-5465      | MSH6 | cna | gain    | METABRIC |
| MB-6271      | MSH6 | cna | hetloss | METABRIC |
| MB-7038      | MSH6 | cna | gain    | METABRIC |
| PD10014      | MSH6 | cna | gain    | BASIS    |
| PD13297      | MSH6 | cna | gain    | BASIS    |
| PD13299      | MSH6 | cna | gain    | BASIS    |
| PD23562      | MSH6 | cna | gain    | BASIS    |
| PD23578      | MSH6 | cna | gain    | BASIS    |
| PD24186      | MSH6 | cna | amp     | BASIS    |
| PD24206      | MSH6 | cna | hetloss | BASIS    |
| PD24337      | MSH6 | cna | gain    | BASIS    |
| PD3890       | MSH6 | cna | hetloss | BASIS    |
| PD3905       | MSH6 | cna | gain    | BASIS    |
| PD4006       | MSH6 | cna | amp     | BASIS    |
| PD4107       | MSH6 | cna | gain    | BASIS    |
| PD5930       | MSH6 | cna | gain    | BASIS    |
| PD5935       | MSH6 | cna | gain    | BASIS    |
| PD5945       | MSH6 | cna | gain    | BASIS    |
| PD5948       | MSH6 | cna | gain    | BASIS    |
| PD7067       | MSH6 | cna | gain    | BASIS    |
| PD7215       | MSH6 | cna | gain    | BASIS    |
| PD8621       | MSH6 | cna | gain    | BASIS    |
| PD8980       | MSH6 | cna | gain    | BASIS    |
| PD9004       | MSH6 | cna | gain    | BASIS    |
| PD9702       | MSH6 | cna | gain    | BASIS    |
| TCGA-A2-A25B | MYCL | cna | hetloss | TCGA     |
| TCGA-AN-A0XU | MYCL | cna | hetloss | TCGA     |
| TCGA-AO-A0JL | MYCL | cna | hetloss | TCGA     |
| TCGA-BH-A0AW | MYCL | cna | gain    | TCGA     |
| TCGA-BH-A0C0 | MYCL | cna | gain    | TCGA     |
| TCGA-BH-A1FU | MYCL | cna | gain    | TCGA     |
| TCGA-C8-A12L | MYCL | cna | hetloss | TCGA     |
| TCGA-D8-A27M | MYCL | cna | gain    | TCGA     |
| TCGA-E2-A1L7 | MYCL | cna | gain    | TCGA     |
| TCGA-LL-A5YP | MYCL | cna | gain    | TCGA     |
| MB-0346      | MYCL | cna | hetloss | METABRIC |

|              |      |     |         |          |
|--------------|------|-----|---------|----------|
| MB-6060      | MYCL | cna | hetloss | METABRIC |
| MB-6098      | MYCL | cna | hetloss | METABRIC |
| MB-7038      | MYCL | cna | gain    | METABRIC |
| MB-0420      | MYCL | cna | hetloss | METABRIC |
| PD13296      | MYCL | cna | gain    | BASIS    |
| PD13299      | MYCL | cna | gain    | BASIS    |
| PD24186      | MYCL | cna | amp     | BASIS    |
| PD24206      | MYCL | cna | gain    | BASIS    |
| PD24337      | MYCL | cna | gain    | BASIS    |
| PD3905       | MYCL | cna | gain    | BASIS    |
| PD4006       | MYCL | cna | gain    | BASIS    |
| PD4107       | MYCL | cna | gain    | BASIS    |
| PD4826       | MYCL | cna | gain    | BASIS    |
| PD5935       | MYCL | cna | gain    | BASIS    |
| PD5945       | MYCL | cna | amp     | BASIS    |
| PD5948       | MYCL | cna | gain    | BASIS    |
| PD7067       | MYCL | cna | gain    | BASIS    |
| PD7215       | MYCL | cna | gain    | BASIS    |
| PD8621       | MYCL | cna | gain    | BASIS    |
| PD8980       | MYCL | cna | gain    | BASIS    |
| PD9004       | MYCL | cna | hetloss | BASIS    |
| PD9702       | MYCL | cna | gain    | BASIS    |
| TCGA-A2-A25B | NF1  | cna | hetloss | TCGA     |
| TCGA-AN-A0XU | NF1  | cna | gain    | TCGA     |
| TCGA-AO-A0JL | NF1  | cna | gain    | TCGA     |
| TCGA-BH-A0AW | NF1  | cna | homdel  | TCGA     |
| TCGA-BH-A0C0 | NF1  | cna | gain    | TCGA     |
| TCGA-BH-A18R | NF1  | cna | amp     | TCGA     |
| TCGA-C8-A12L | NF1  | cna | gain    | TCGA     |
| TCGA-D8-A27M | NF1  | cna | hetloss | TCGA     |
| TCGA-E2-A1L7 | NF1  | cna | hetloss | TCGA     |
| TCGA-E9-A1NC | NF1  | cna | hetloss | TCGA     |
| MB-0346      | NF1  | cna | hetloss | METABRIC |
| MB-2827      | NF1  | cna | homdel  | METABRIC |
| MB-5070      | NF1  | cna | gain    | METABRIC |
| MB-5465      | NF1  | cna | hetloss | METABRIC |
| MB-6098      | NF1  | cna | hetloss | METABRIC |
| MB-6271      | NF1  | cna | hetloss | METABRIC |
| MB-7038      | NF1  | cna | hetloss | METABRIC |
| MB-0420      | NF1  | cna | hetloss | METABRIC |
| PD11742      | NF1  | cna | hetloss | BASIS    |
| PD22355      | NF1  | cna | hetloss | BASIS    |
| PD23561      | NF1  | cna | hetloss | BASIS    |
| PD24337      | NF1  | cna | hetloss | BASIS    |
| PD3890       | NF1  | cna | hetloss | BASIS    |
| PD4005       | NF1  | cna | hetloss | BASIS    |
| PD4967       | NF1  | cna | hetloss | BASIS    |

|              |        |     |         |          |
|--------------|--------|-----|---------|----------|
| PD5945       | NF1    | cna | gain    | BASIS    |
| PD6406       | NF1    | cna | hetloss | BASIS    |
| PD6413       | NF1    | cna | hetloss | BASIS    |
| PD6731       | NF1    | cna | hetloss | BASIS    |
| PD7067       | NF1    | cna | gain    | BASIS    |
| PD7215       | NF1    | cna | gain    | BASIS    |
| PD9585       | NF1    | cna | hetloss | BASIS    |
| PD9702       | NF1    | cna | gain    | BASIS    |
| TCGA-A2-A25B | NF2    | cna | hetloss | TCGA     |
| TCGA-BH-A0C0 | NF2    | cna | gain    | TCGA     |
| TCGA-BH-A1FU | NF2    | cna | gain    | TCGA     |
| TCGA-C8-A12L | NF2    | cna | gain    | TCGA     |
| TCGA-D8-A27M | NF2    | cna | gain    | TCGA     |
| TCGA-E9-A1NC | NF2    | cna | gain    | TCGA     |
| TCGA-LL-A5YP | NF2    | cna | amp     | TCGA     |
| MB-0346      | NF2    | cna | gain    | METABRIC |
| MB-6060      | NF2    | cna | gain    | METABRIC |
| MB-6098      | NF2    | cna | gain    | METABRIC |
| PD11327      | NF2    | cna | gain    | BASIS    |
| PD13296      | NF2    | cna | gain    | BASIS    |
| PD13297      | NF2    | cna | gain    | BASIS    |
| PD13299      | NF2    | cna | gain    | BASIS    |
| PD14442      | NF2    | cna | hetloss | BASIS    |
| PD23562      | NF2    | cna | gain    | BASIS    |
| PD23574      | NF2    | cna | gain    | BASIS    |
| PD24206      | NF2    | cna | hetloss | BASIS    |
| PD3905       | NF2    | cna | gain    | BASIS    |
| PD4006       | NF2    | cna | gain    | BASIS    |
| PD4107       | NF2    | cna | amp     | BASIS    |
| PD4826       | NF2    | cna | gain    | BASIS    |
| PD4967       | NF2    | cna | hetloss | BASIS    |
| PD5930       | NF2    | cna | gain    | BASIS    |
| PD5935       | NF2    | cna | gain    | BASIS    |
| PD5945       | NF2    | cna | amp     | BASIS    |
| PD5948       | NF2    | cna | gain    | BASIS    |
| PD6731       | NF2    | cna | hetloss | BASIS    |
| PD7067       | NF2    | cna | gain    | BASIS    |
| PD7215       | NF2    | cna | gain    | BASIS    |
| PD8621       | NF2    | cna | gain    | BASIS    |
| PD9004       | NF2    | cna | gain    | BASIS    |
| PD9702       | NF2    | cna | gain    | BASIS    |
| TCGA-A2-A25B | NFE2L3 | cna | gain    | TCGA     |
| TCGA-BH-A0AW | NFE2L3 | cna | gain    | TCGA     |
| TCGA-BH-A0C0 | NFE2L3 | cna | hetloss | TCGA     |
| TCGA-C8-A12L | NFE2L3 | cna | gain    | TCGA     |
| TCGA-D8-A27M | NFE2L3 | cna | hetloss | TCGA     |
| TCGA-LL-A5YP | NFE2L3 | cna | hetloss | TCGA     |

|              |        |     |         |          |
|--------------|--------|-----|---------|----------|
| MB-0346      | NFE2L3 | cna | gain    | METABRIC |
| MB-5070      | NFE2L3 | cna | hetloss | METABRIC |
| MB-6098      | NFE2L3 | cna | hetloss | METABRIC |
| MB-0420      | NFE2L3 | cna | hetloss | METABRIC |
| PD10014      | NFE2L3 | cna | hetloss | BASIS    |
| PD11327      | NFE2L3 | cna | gain    | BASIS    |
| PD13296      | NFE2L3 | cna | gain    | BASIS    |
| PD13297      | NFE2L3 | cna | hetloss | BASIS    |
| PD22355      | NFE2L3 | cna | hetloss | BASIS    |
| PD23574      | NFE2L3 | cna | gain    | BASIS    |
| PD23578      | NFE2L3 | cna | hetloss | BASIS    |
| PD24186      | NFE2L3 | cna | gain    | BASIS    |
| PD24206      | NFE2L3 | cna | gain    | BASIS    |
| PD24337      | NFE2L3 | cna | hetloss | BASIS    |
| PD3905       | NFE2L3 | cna | gain    | BASIS    |
| PD4005       | NFE2L3 | cna | hetloss | BASIS    |
| PD4006       | NFE2L3 | cna | gain    | BASIS    |
| PD4107       | NFE2L3 | cna | amp     | BASIS    |
| PD4826       | NFE2L3 | cna | gain    | BASIS    |
| PD5935       | NFE2L3 | cna | gain    | BASIS    |
| PD5945       | NFE2L3 | cna | amp     | BASIS    |
| PD6406       | NFE2L3 | cna | hetloss | BASIS    |
| PD6413       | NFE2L3 | cna | gain    | BASIS    |
| PD7215       | NFE2L3 | cna | gain    | BASIS    |
| PD8621       | NFE2L3 | cna | gain    | BASIS    |
| PD9585       | NFE2L3 | cna | gain    | BASIS    |
| PD9702       | NFE2L3 | cna | gain    | BASIS    |
| TCGA-AN-A0XU | NPM1   | cna | hetloss | TCGA     |
| TCGA-AO-A0JL | NPM1   | cna | gain    | TCGA     |
| TCGA-BH-A0C0 | NPM1   | cna | hetloss | TCGA     |
| TCGA-BH-A1FU | NPM1   | cna | hetloss | TCGA     |
| TCGA-C8-A12L | NPM1   | cna | hetloss | TCGA     |
| TCGA-D8-A27M | NPM1   | cna | hetloss | TCGA     |
| TCGA-E2-A1L7 | NPM1   | cna | hetloss | TCGA     |
| TCGA-LL-A5YP | NPM1   | cna | hetloss | TCGA     |
| MB-5070      | NPM1   | cna | hetloss | METABRIC |
| MB-5465      | NPM1   | cna | hetloss | METABRIC |
| MB-6098      | NPM1   | cna | hetloss | METABRIC |
| MB-0420      | NPM1   | cna | hetloss | METABRIC |
| PD10014      | NPM1   | cna | hetloss | BASIS    |
| PD13296      | NPM1   | cna | hetloss | BASIS    |
| PD13297      | NPM1   | cna | hetloss | BASIS    |
| PD13771      | NPM1   | cna | gain    | BASIS    |
| PD22355      | NPM1   | cna | hetloss | BASIS    |
| PD23578      | NPM1   | cna | hetloss | BASIS    |
| PD24186      | NPM1   | cna | gain    | BASIS    |
| PD24202      | NPM1   | cna | hetloss | BASIS    |

|              |       |     |         |          |
|--------------|-------|-----|---------|----------|
| PD24206      | NPM1  | cna | gain    | BASIS    |
| PD24337      | NPM1  | cna | hetloss | BASIS    |
| PD3890       | NPM1  | cna | hetloss | BASIS    |
| PD3905       | NPM1  | cna | gain    | BASIS    |
| PD4005       | NPM1  | cna | hetloss | BASIS    |
| PD4006       | NPM1  | cna | gain    | BASIS    |
| PD4107       | NPM1  | cna | hetloss | BASIS    |
| PD4826       | NPM1  | cna | gain    | BASIS    |
| PD5945       | NPM1  | cna | gain    | BASIS    |
| PD6406       | NPM1  | cna | hetloss | BASIS    |
| PD6413       | NPM1  | cna | hetloss | BASIS    |
| PD7067       | NPM1  | cna | gain    | BASIS    |
| PD8980       | NPM1  | cna | gain    | BASIS    |
| TCGA-AO-A0JL | NR1H2 | cna | hetloss | TCGA     |
| TCGA-BH-A0AW | NR1H2 | cna | gain    | TCGA     |
| TCGA-BH-A0C0 | NR1H2 | cna | hetloss | TCGA     |
| TCGA-BH-A1FU | NR1H2 | cna | hetloss | TCGA     |
| TCGA-D8-A27M | NR1H2 | cna | hetloss | TCGA     |
| TCGA-E2-A1L7 | NR1H2 | cna | hetloss | TCGA     |
| TCGA-EW-A10X | NR1H2 | cna | gain    | TCGA     |
| TCGA-LL-A5YP | NR1H2 | cna | gain    | TCGA     |
| MB-0346      | NR1H2 | cna | hetloss | METABRIC |
| MB-6098      | NR1H2 | cna | hetloss | METABRIC |
| MB-7048      | NR1H2 | cna | gain    | METABRIC |
| PD11327      | NR1H2 | cna | gain    | BASIS    |
| PD13296      | NR1H2 | cna | gain    | BASIS    |
| PD13299      | NR1H2 | cna | gain    | BASIS    |
| PD13771      | NR1H2 | cna | hetloss | BASIS    |
| PD23562      | NR1H2 | cna | gain    | BASIS    |
| PD23574      | NR1H2 | cna | gain    | BASIS    |
| PD24186      | NR1H2 | cna | gain    | BASIS    |
| PD24206      | NR1H2 | cna | hetloss | BASIS    |
| PD24337      | NR1H2 | cna | hetloss | BASIS    |
| PD3890       | NR1H2 | cna | hetloss | BASIS    |
| PD3905       | NR1H2 | cna | gain    | BASIS    |
| PD4006       | NR1H2 | cna | gain    | BASIS    |
| PD4826       | NR1H2 | cna | gain    | BASIS    |
| PD5935       | NR1H2 | cna | gain    | BASIS    |
| PD5945       | NR1H2 | cna | gain    | BASIS    |
| PD5948       | NR1H2 | cna | gain    | BASIS    |
| PD6406       | NR1H2 | cna | gain    | BASIS    |
| PD7067       | NR1H2 | cna | gain    | BASIS    |
| PD7215       | NR1H2 | cna | gain    | BASIS    |
| PD8621       | NR1H2 | cna | gain    | BASIS    |
| PD8980       | NR1H2 | cna | hetloss | BASIS    |
| PD9585       | NR1H2 | cna | gain    | BASIS    |
| TCGA-A2-A25B | NTRK2 | cna | gain    | TCGA     |

|              |        |     |         |          |
|--------------|--------|-----|---------|----------|
| TCGA-AN-A0XU | NTRK2  | cna | hetloss | TCGA     |
| TCGA-AO-A0JL | NTRK2  | cna | hetloss | TCGA     |
| TCGA-BH-A0C0 | NTRK2  | cna | hetloss | TCGA     |
| TCGA-BH-A1FU | NTRK2  | cna | hetloss | TCGA     |
| TCGA-C8-A12L | NTRK2  | cna | hetloss | TCGA     |
| TCGA-E9-A1NC | NTRK2  | cna | hetloss | TCGA     |
| TCGA-LL-A5YP | NTRK2  | cna | hetloss | TCGA     |
| MB-0346      | NTRK2  | cna | hetloss | METABRIC |
| MB-5107      | NTRK2  | cna | hetloss | METABRIC |
| MB-6098      | NTRK2  | cna | hetloss | METABRIC |
| MB-7038      | NTRK2  | cna | hetloss | METABRIC |
| MB-0420      | NTRK2  | cna | hetloss | METABRIC |
| MTS-T0064    | NTRK2  | cna | gain    | METABRIC |
| PD11327      | NTRK2  | cna | gain    | BASIS    |
| PD23562      | NTRK2  | cna | gain    | BASIS    |
| PD23578      | NTRK2  | cna | hetloss | BASIS    |
| PD24186      | NTRK2  | cna | amp     | BASIS    |
| PD24202      | NTRK2  | cna | hetloss | BASIS    |
| PD24206      | NTRK2  | cna | gain    | BASIS    |
| PD3890       | NTRK2  | cna | gain    | BASIS    |
| PD3905       | NTRK2  | cna | gain    | BASIS    |
| PD4006       | NTRK2  | cna | gain    | BASIS    |
| PD4107       | NTRK2  | cna | gain    | BASIS    |
| PD5935       | NTRK2  | cna | gain    | BASIS    |
| PD5945       | NTRK2  | cna | amp     | BASIS    |
| PD5948       | NTRK2  | cna | gain    | BASIS    |
| PD6731       | NTRK2  | cna | hetloss | BASIS    |
| PD7067       | NTRK2  | cna | gain    | BASIS    |
| PD7215       | NTRK2  | cna | gain    | BASIS    |
| PD8621       | NTRK2  | cna | gain    | BASIS    |
| PD9004       | NTRK2  | cna | gain    | BASIS    |
| PD9585       | NTRK2  | cna | hetloss | BASIS    |
| TCGA-A2-A25B | NUTM2B | cna | hetloss | TCGA     |
| TCGA-AN-A0XU | NUTM2B | cna | hetloss | TCGA     |
| TCGA-AO-A0JL | NUTM2B | cna | gain    | TCGA     |
| TCGA-BH-A18R | NUTM2B | cna | gain    | TCGA     |
| TCGA-C8-A12L | NUTM2B | cna | gain    | TCGA     |
| TCGA-D8-A27M | NUTM2B | cna | hetloss | TCGA     |
| MB-5070      | NUTM2B | cna | amp     | METABRIC |
| MB-6060      | NUTM2B | cna | hetloss | METABRIC |
| MB-6098      | NUTM2B | cna | hetloss | METABRIC |
| MTS-T0064    | NUTM2B | cna | gain    | METABRIC |
| PD10014      | NUTM2B | cna | gain    | BASIS    |
| PD11327      | NUTM2B | cna | amp     | BASIS    |
| PD13296      | NUTM2B | cna | hetloss | BASIS    |
| PD13299      | NUTM2B | cna | gain    | BASIS    |
| PD23574      | NUTM2B | cna | gain    | BASIS    |



|              |        |     |         |          |
|--------------|--------|-----|---------|----------|
| PD24186      | NUTM2B | cna | gain    | BASIS    |
| PD24202      | NUTM2B | cna | hetloss | BASIS    |
| PD24206      | NUTM2B | cna | gain    | BASIS    |
| PD3890       | NUTM2B | cna | hetloss | BASIS    |
| PD4006       | NUTM2B | cna | gain    | BASIS    |
| PD4107       | NUTM2B | cna | gain    | BASIS    |
| PD4826       | NUTM2B | cna | gain    | BASIS    |
| PD5930       | NUTM2B | cna | gain    | BASIS    |
| PD5945       | NUTM2B | cna | gain    | BASIS    |
| PD6406       | NUTM2B | cna | hetloss | BASIS    |
| PD6731       | NUTM2B | cna | hetloss | BASIS    |
| PD7067       | NUTM2B | cna | gain    | BASIS    |
| PD7215       | NUTM2B | cna | amp     | BASIS    |
| PD8621       | NUTM2B | cna | gain    | BASIS    |
| PD8980       | NUTM2B | cna | hetloss | BASIS    |
| PD9004       | NUTM2B | cna | gain    | BASIS    |
| PD9585       | NUTM2B | cna | hetloss | BASIS    |
| PD9702       | NUTM2B | cna | gain    | BASIS    |
| TCGA-A2-A25B | PCBP1  | cna | hetloss | TCGA     |
| TCGA-AN-A0XU | PCBP1  | cna | gain    | TCGA     |
| TCGA-AO-A0JL | PCBP1  | cna | gain    | TCGA     |
| TCGA-BH-A0AW | PCBP1  | cna | gain    | TCGA     |
| TCGA-BH-A0C0 | PCBP1  | cna | gain    | TCGA     |
| TCGA-D8-A27M | PCBP1  | cna | gain    | TCGA     |
| TCGA-E9-A1NC | PCBP1  | cna | gain    | TCGA     |
| TCGA-LL-A5YP | PCBP1  | cna | gain    | TCGA     |
| MB-5070      | PCBP1  | cna | hetloss | METABRIC |
| MB-6098      | PCBP1  | cna | gain    | METABRIC |
| MB-6271      | PCBP1  | cna | hetloss | METABRIC |
| MB-7038      | PCBP1  | cna | gain    | METABRIC |
| MB-7048      | PCBP1  | cna | hetloss | METABRIC |
| PD13296      | PCBP1  | cna | hetloss | BASIS    |
| PD13297      | PCBP1  | cna | gain    | BASIS    |
| PD13299      | PCBP1  | cna | gain    | BASIS    |
| PD23562      | PCBP1  | cna | gain    | BASIS    |
| PD23578      | PCBP1  | cna | gain    | BASIS    |
| PD24186      | PCBP1  | cna | gain    | BASIS    |
| PD24202      | PCBP1  | cna | gain    | BASIS    |
| PD24206      | PCBP1  | cna | gain    | BASIS    |
| PD3890       | PCBP1  | cna | hetloss | BASIS    |
| PD3905       | PCBP1  | cna | gain    | BASIS    |
| PD4006       | PCBP1  | cna | gain    | BASIS    |
| PD5930       | PCBP1  | cna | gain    | BASIS    |
| PD5935       | PCBP1  | cna | gain    | BASIS    |
| PD5945       | PCBP1  | cna | gain    | BASIS    |
| PD7067       | PCBP1  | cna | gain    | BASIS    |
| PD7215       | PCBP1  | cna | gain    | BASIS    |

|              |        |     |         |          |
|--------------|--------|-----|---------|----------|
| PD8621       | PCBP1  | cna | gain    | BASIS    |
| PD9004       | PCBP1  | cna | gain    | BASIS    |
| PD9585       | PCBP1  | cna | gain    | BASIS    |
| PD9702       | PCBP1  | cna | gain    | BASIS    |
| TCGA-A2-A25B | PDK1   | cna | gain    | TCGA     |
| TCGA-AO-A0JL | PDK1   | cna | gain    | TCGA     |
| TCGA-BH-A0AW | PDK1   | cna | gain    | TCGA     |
| TCGA-D8-A27M | PDK1   | cna | gain    | TCGA     |
| TCGA-LL-A5YP | PDK1   | cna | gain    | TCGA     |
| MB-2827      | PDK1   | cna | hetloss | METABRIC |
| MB-5107      | PDK1   | cna | hetloss | METABRIC |
| MB-6098      | PDK1   | cna | hetloss | METABRIC |
| MB-6271      | PDK1   | cna | hetloss | METABRIC |
| MB-7032      | PDK1   | cna | gain    | METABRIC |
| PD11327      | PDK1   | cna | gain    | BASIS    |
| PD13299      | PDK1   | cna | gain    | BASIS    |
| PD22355      | PDK1   | cna | hetloss | BASIS    |
| PD23578      | PDK1   | cna | gain    | BASIS    |
| PD24186      | PDK1   | cna | gain    | BASIS    |
| PD24202      | PDK1   | cna | gain    | BASIS    |
| PD24206      | PDK1   | cna | gain    | BASIS    |
| PD3890       | PDK1   | cna | hetloss | BASIS    |
| PD3905       | PDK1   | cna | gain    | BASIS    |
| PD4005       | PDK1   | cna | hetloss | BASIS    |
| PD4006       | PDK1   | cna | gain    | BASIS    |
| PD4107       | PDK1   | cna | gain    | BASIS    |
| PD4967       | PDK1   | cna | hetloss | BASIS    |
| PD5930       | PDK1   | cna | hetloss | BASIS    |
| PD5935       | PDK1   | cna | gain    | BASIS    |
| PD5945       | PDK1   | cna | amp     | BASIS    |
| PD5948       | PDK1   | cna | gain    | BASIS    |
| PD6413       | PDK1   | cna | hetloss | BASIS    |
| PD7067       | PDK1   | cna | gain    | BASIS    |
| PD7215       | PDK1   | cna | gain    | BASIS    |
| PD8621       | PDK1   | cna | hetloss | BASIS    |
| PD9004       | PDK1   | cna | gain    | BASIS    |
| PD9702       | PDK1   | cna | gain    | BASIS    |
| TCGA-A2-A25B | PIK3C3 | cna | hetloss | TCGA     |
| TCGA-AN-A0XU | PIK3C3 | cna | hetloss | TCGA     |
| TCGA-AO-A0JL | PIK3C3 | cna | gain    | TCGA     |
| TCGA-BH-A0AW | PIK3C3 | cna | hetloss | TCGA     |
| TCGA-BH-A0C0 | PIK3C3 | cna | gain    | TCGA     |
| TCGA-C8-A12L | PIK3C3 | cna | gain    | TCGA     |
| TCGA-D8-A27M | PIK3C3 | cna | hetloss | TCGA     |
| TCGA-E2-A1L7 | PIK3C3 | cna | gain    | TCGA     |
| TCGA-LL-A5YP | PIK3C3 | cna | hetloss | TCGA     |
| MB-0346      | PIK3C3 | cna | hetloss | METABRIC |

|              |        |     |         |          |
|--------------|--------|-----|---------|----------|
| PD10014      | PIK3C3 | cna | hetloss | BASIS    |
| PD11327      | PIK3C3 | cna | gain    | BASIS    |
| PD11742      | PIK3C3 | cna | hetloss | BASIS    |
| PD13296      | PIK3C3 | cna | hetloss | BASIS    |
| PD13297      | PIK3C3 | cna | gain    | BASIS    |
| PD13299      | PIK3C3 | cna | gain    | BASIS    |
| PD23574      | PIK3C3 | cna | hetloss | BASIS    |
| PD24186      | PIK3C3 | cna | gain    | BASIS    |
| PD24202      | PIK3C3 | cna | hetloss | BASIS    |
| PD24337      | PIK3C3 | cna | gain    | BASIS    |
| PD3905       | PIK3C3 | cna | gain    | BASIS    |
| PD4005       | PIK3C3 | cna | gain    | BASIS    |
| PD4107       | PIK3C3 | cna | gain    | BASIS    |
| PD4967       | PIK3C3 | cna | hetloss | BASIS    |
| PD5930       | PIK3C3 | cna | gain    | BASIS    |
| PD5945       | PIK3C3 | cna | gain    | BASIS    |
| PD5948       | PIK3C3 | cna | hetloss | BASIS    |
| PD6406       | PIK3C3 | cna | gain    | BASIS    |
| PD7215       | PIK3C3 | cna | gain    | BASIS    |
| PD8621       | PIK3C3 | cna | hetloss | BASIS    |
| PD8980       | PIK3C3 | cna | hetloss | BASIS    |
| PD9004       | PIK3C3 | cna | gain    | BASIS    |
| PD9702       | PIK3C3 | cna | gain    | BASIS    |
| TCGA-AN-A0XU | PMS1   | cna | gain    | TCGA     |
| TCGA-AO-A0JL | PMS1   | cna | gain    | TCGA     |
| TCGA-BH-A0AW | PMS1   | cna | gain    | TCGA     |
| TCGA-C8-A12L | PMS1   | cna | gain    | TCGA     |
| TCGA-D8-A27M | PMS1   | cna | gain    | TCGA     |
| TCGA-LL-A5YP | PMS1   | cna | gain    | TCGA     |
| MB-2827      | PMS1   | cna | hetloss | METABRIC |
| MB-5465      | PMS1   | cna | hetloss | METABRIC |
| MB-6060      | PMS1   | cna | gain    | METABRIC |
| MB-6098      | PMS1   | cna | hetloss | METABRIC |
| MB-6271      | PMS1   | cna | hetloss | METABRIC |
| MB-7032      | PMS1   | cna | gain    | METABRIC |
| MB-0420      | PMS1   | cna | gain    | METABRIC |
| PD10014      | PMS1   | cna | gain    | BASIS    |
| PD11327      | PMS1   | cna | gain    | BASIS    |
| PD13297      | PMS1   | cna | hetloss | BASIS    |
| PD13299      | PMS1   | cna | gain    | BASIS    |
| PD22355      | PMS1   | cna | hetloss | BASIS    |
| PD24186      | PMS1   | cna | gain    | BASIS    |
| PD24206      | PMS1   | cna | gain    | BASIS    |
| PD3890       | PMS1   | cna | hetloss | BASIS    |
| PD3905       | PMS1   | cna | gain    | BASIS    |
| PD4107       | PMS1   | cna | gain    | BASIS    |
| PD4967       | PMS1   | cna | hetloss | BASIS    |

|              |         |     |         |          |
|--------------|---------|-----|---------|----------|
| PD5935       | PMS1    | cna | gain    | BASIS    |
| PD5945       | PMS1    | cna | amp     | BASIS    |
| PD5948       | PMS1    | cna | gain    | BASIS    |
| PD6413       | PMS1    | cna | hetloss | BASIS    |
| PD7067       | PMS1    | cna | amp     | BASIS    |
| PD7215       | PMS1    | cna | gain    | BASIS    |
| PD9004       | PMS1    | cna | gain    | BASIS    |
| PD9585       | PMS1    | cna | hetloss | BASIS    |
| PD9702       | PMS1    | cna | gain    | BASIS    |
| TCGA-BH-A0C0 | POGLUT1 | cna | hetloss | TCGA     |
| TCGA-BH-A18R | POGLUT1 | cna | gain    | TCGA     |
| TCGA-BH-A1FU | POGLUT1 | cna | hetloss | TCGA     |
| TCGA-C8-A12L | POGLUT1 | cna | hetloss | TCGA     |
| TCGA-E2-A1L7 | POGLUT1 | cna | hetloss | TCGA     |
| TCGA-LL-A5YP | POGLUT1 | cna | gain    | TCGA     |
| MB-0346      | POGLUT1 | cna | hetloss | METABRIC |
| MB-2827      | POGLUT1 | cna | hetloss | METABRIC |
| MB-5070      | POGLUT1 | cna | hetloss | METABRIC |
| MB-5107      | POGLUT1 | cna | gain    | METABRIC |
| MB-5465      | POGLUT1 | cna | gain    | METABRIC |
| MB-6098      | POGLUT1 | cna | hetloss | METABRIC |
| MTS-T0064    | POGLUT1 | cna | hetloss | METABRIC |
| PD13296      | POGLUT1 | cna | hetloss | BASIS    |
| PD13299      | POGLUT1 | cna | gain    | BASIS    |
| PD23561      | POGLUT1 | cna | hetloss | BASIS    |
| PD23574      | POGLUT1 | cna | gain    | BASIS    |
| PD24186      | POGLUT1 | cna | gain    | BASIS    |
| PD24206      | POGLUT1 | cna | gain    | BASIS    |
| PD3905       | POGLUT1 | cna | gain    | BASIS    |
| PD4005       | POGLUT1 | cna | hetloss | BASIS    |
| PD4107       | POGLUT1 | cna | gain    | BASIS    |
| PD4826       | POGLUT1 | cna | gain    | BASIS    |
| PD5935       | POGLUT1 | cna | gain    | BASIS    |
| PD5945       | POGLUT1 | cna | gain    | BASIS    |
| PD5948       | POGLUT1 | cna | gain    | BASIS    |
| PD6731       | POGLUT1 | cna | gain    | BASIS    |
| PD7067       | POGLUT1 | cna | gain    | BASIS    |
| PD7215       | POGLUT1 | cna | gain    | BASIS    |
| PD8621       | POGLUT1 | cna | gain    | BASIS    |
| PD8980       | POGLUT1 | cna | gain    | BASIS    |
| PD9004       | POGLUT1 | cna | gain    | BASIS    |
| PD9702       | POGLUT1 | cna | gain    | BASIS    |
| TCGA-AN-A0XU | POLQ    | cna | gain    | TCGA     |
| TCGA-BH-A0C0 | POLQ    | cna | hetloss | TCGA     |
| TCGA-BH-A18R | POLQ    | cna | gain    | TCGA     |
| TCGA-BH-A1FU | POLQ    | cna | hetloss | TCGA     |
| TCGA-C8-A12L | POLQ    | cna | hetloss | TCGA     |

|              |      |     |         |          |
|--------------|------|-----|---------|----------|
| TCGA-E2-A1L7 | POLQ | cna | hetloss | TCGA     |
| TCGA-LL-A5YP | POLQ | cna | gain    | TCGA     |
| MB-0346      | POLQ | cna | hetloss | METABRIC |
| MB-5070      | POLQ | cna | hetloss | METABRIC |
| MB-5107      | POLQ | cna | gain    | METABRIC |
| MB-5465      | POLQ | cna | gain    | METABRIC |
| MB-6098      | POLQ | cna | hetloss | METABRIC |
| MTS-T0064    | POLQ | cna | hetloss | METABRIC |
| PD13296      | POLQ | cna | hetloss | BASIS    |
| PD13299      | POLQ | cna | gain    | BASIS    |
| PD23561      | POLQ | cna | hetloss | BASIS    |
| PD23574      | POLQ | cna | gain    | BASIS    |
| PD24186      | POLQ | cna | gain    | BASIS    |
| PD24206      | POLQ | cna | gain    | BASIS    |
| PD3905       | POLQ | cna | gain    | BASIS    |
| PD4005       | POLQ | cna | hetloss | BASIS    |
| PD4107       | POLQ | cna | gain    | BASIS    |
| PD4826       | POLQ | cna | gain    | BASIS    |
| PD5935       | POLQ | cna | gain    | BASIS    |
| PD5945       | POLQ | cna | gain    | BASIS    |
| PD5948       | POLQ | cna | gain    | BASIS    |
| PD6731       | POLQ | cna | gain    | BASIS    |
| PD7067       | POLQ | cna | gain    | BASIS    |
| PD7215       | POLQ | cna | gain    | BASIS    |
| PD8621       | POLQ | cna | gain    | BASIS    |
| PD8980       | POLQ | cna | gain    | BASIS    |
| PD9004       | POLQ | cna | gain    | BASIS    |
| PD9702       | POLQ | cna | gain    | BASIS    |
| TCGA-A2-A25B | RAC1 | cna | gain    | TCGA     |
| TCGA-BH-A0AW | RAC1 | cna | gain    | TCGA     |
| TCGA-BH-A0C0 | RAC1 | cna | hetloss | TCGA     |
| TCGA-C8-A12L | RAC1 | cna | gain    | TCGA     |
| TCGA-E2-A1L7 | RAC1 | cna | hetloss | TCGA     |
| TCGA-LL-A5YP | RAC1 | cna | hetloss | TCGA     |
| MB-5465      | RAC1 | cna | gain    | METABRIC |
| MB-6098      | RAC1 | cna | hetloss | METABRIC |
| MB-7038      | RAC1 | cna | hetloss | METABRIC |
| MB-7048      | RAC1 | cna | hetloss | METABRIC |
| MB-0420      | RAC1 | cna | hetloss | METABRIC |
| PD11327      | RAC1 | cna | homdel  | BASIS    |
| PD13297      | RAC1 | cna | hetloss | BASIS    |
| PD13771      | RAC1 | cna | gain    | BASIS    |
| PD22355      | RAC1 | cna | hetloss | BASIS    |
| PD23574      | RAC1 | cna | gain    | BASIS    |
| PD23578      | RAC1 | cna | hetloss | BASIS    |
| PD24202      | RAC1 | cna | gain    | BASIS    |
| PD24206      | RAC1 | cna | gain    | BASIS    |

|              |         |     |         |          |
|--------------|---------|-----|---------|----------|
| PD24337      | RAC1    | cna | hetloss | BASIS    |
| PD3905       | RAC1    | cna | gain    | BASIS    |
| PD4006       | RAC1    | cna | gain    | BASIS    |
| PD4107       | RAC1    | cna | gain    | BASIS    |
| PD4826       | RAC1    | cna | gain    | BASIS    |
| PD5935       | RAC1    | cna | gain    | BASIS    |
| PD5945       | RAC1    | cna | gain    | BASIS    |
| PD6406       | RAC1    | cna | hetloss | BASIS    |
| PD7067       | RAC1    | cna | gain    | BASIS    |
| PD7215       | RAC1    | cna | gain    | BASIS    |
| PD8621       | RAC1    | cna | gain    | BASIS    |
| PD8980       | RAC1    | cna | hetloss | BASIS    |
| PD9004       | RAC1    | cna | gain    | BASIS    |
| PD9702       | RAC1    | cna | gain    | BASIS    |
| TCGA-AN-A0XU | RANBP17 | cna | hetloss | TCGA     |
| TCGA-AO-A0JL | RANBP17 | cna | gain    | TCGA     |
| TCGA-BH-A0C0 | RANBP17 | cna | gain    | TCGA     |
| TCGA-BH-A1FU | RANBP17 | cna | hetloss | TCGA     |
| TCGA-C8-A12L | RANBP17 | cna | hetloss | TCGA     |
| TCGA-D8-A27M | RANBP17 | cna | hetloss | TCGA     |
| TCGA-E2-A1L7 | RANBP17 | cna | hetloss | TCGA     |
| TCGA-LL-A5YP | RANBP17 | cna | hetloss | TCGA     |
| MB-5070      | RANBP17 | cna | hetloss | METABRIC |
| MB-5465      | RANBP17 | cna | hetloss | METABRIC |
| MB-6098      | RANBP17 | cna | hetloss | METABRIC |
| MB-0420      | RANBP17 | cna | hetloss | METABRIC |
| PD10014      | RANBP17 | cna | hetloss | BASIS    |
| PD13296      | RANBP17 | cna | hetloss | BASIS    |
| PD13297      | RANBP17 | cna | hetloss | BASIS    |
| PD13771      | RANBP17 | cna | gain    | BASIS    |
| PD22355      | RANBP17 | cna | hetloss | BASIS    |
| PD23578      | RANBP17 | cna | hetloss | BASIS    |
| PD24186      | RANBP17 | cna | gain    | BASIS    |
| PD24202      | RANBP17 | cna | hetloss | BASIS    |
| PD24206      | RANBP17 | cna | gain    | BASIS    |
| PD24337      | RANBP17 | cna | hetloss | BASIS    |
| PD3890       | RANBP17 | cna | hetloss | BASIS    |
| PD3905       | RANBP17 | cna | gain    | BASIS    |
| PD4005       | RANBP17 | cna | hetloss | BASIS    |
| PD4107       | RANBP17 | cna | hetloss | BASIS    |
| PD4826       | RANBP17 | cna | gain    | BASIS    |
| PD5945       | RANBP17 | cna | gain    | BASIS    |
| PD6406       | RANBP17 | cna | hetloss | BASIS    |
| PD6413       | RANBP17 | cna | hetloss | BASIS    |
| PD7067       | RANBP17 | cna | gain    | BASIS    |
| PD8980       | RANBP17 | cna | gain    | BASIS    |
| PD9702       | RANBP17 | cna | gain    | BASIS    |

|                   |         |     |         |            |
|-------------------|---------|-----|---------|------------|
| TCGA-A2-A25B      | RPS6KB2 | cna | hetloss | TCGA       |
| TCGA-AN-A0XU      | RPS6KB2 | cna | hetloss | TCGA       |
| TCGA-AO-A0JL      | RPS6KB2 | cna | hetloss | TCGA       |
| TCGA-BH-A0C0      | RPS6KB2 | cna | gain    | TCGA       |
| TCGA-C8-A12L      | RPS6KB2 | cna | gain    | TCGA       |
| TCGA-EW-A10X      | RPS6KB2 | cna | gain    | TCGA       |
| TCGA-LL-A5YP      | RPS6KB2 | cna | hetloss | TCGA       |
| MB-0346           | RPS6KB2 | cna | gain    | METABRIC   |
| MB-5107           | RPS6KB2 | cna | gain    | METABRIC   |
| MB-6271           | RPS6KB2 | cna | amp     | METABRIC   |
| MB-7038           | RPS6KB2 | cna | gain    | METABRIC   |
| P-0002591-T01-IM3 | RPS6KB2 | cna | amp     | MSK-IMPACT |
| P-0002858-T01-IM3 | RPS6KB2 | cna | amp     | MSK-IMPACT |
| PD11327           | RPS6KB2 | cna | hetloss | BASIS      |
| PD11742           | RPS6KB2 | cna | gain    | BASIS      |
| PD22355           | RPS6KB2 | cna | gain    | BASIS      |
| PD23574           | RPS6KB2 | cna | gain    | BASIS      |
| PD24186           | RPS6KB2 | cna | amp     | BASIS      |
| PD3905            | RPS6KB2 | cna | gain    | BASIS      |
| PD4006            | RPS6KB2 | cna | amp     | BASIS      |
| PD4107            | RPS6KB2 | cna | gain    | BASIS      |
| PD4826            | RPS6KB2 | cna | gain    | BASIS      |
| PD5930            | RPS6KB2 | cna | gain    | BASIS      |
| PD5935            | RPS6KB2 | cna | gain    | BASIS      |
| PD5945            | RPS6KB2 | cna | amp     | BASIS      |
| PD5948            | RPS6KB2 | cna | amp     | BASIS      |
| PD6413            | RPS6KB2 | cna | gain    | BASIS      |
| PD7067            | RPS6KB2 | cna | gain    | BASIS      |
| PD7215            | RPS6KB2 | cna | gain    | BASIS      |
| PD8621            | RPS6KB2 | cna | gain    | BASIS      |
| PD8980            | RPS6KB2 | cna | gain    | BASIS      |
| PD9004            | RPS6KB2 | cna | gain    | BASIS      |
| PD9702            | RPS6KB2 | cna | gain    | BASIS      |
| TCGA-A2-A25B      | SBDS    | cna | hetloss | TCGA       |
| TCGA-AN-A0XU      | SBDS    | cna | hetloss | TCGA       |
| TCGA-AO-A0JL      | SBDS    | cna | gain    | TCGA       |
| TCGA-BH-A0AW      | SBDS    | cna | gain    | TCGA       |
| TCGA-C8-A12L      | SBDS    | cna | gain    | TCGA       |
| TCGA-D8-A27M      | SBDS    | cna | gain    | TCGA       |
| TCGA-LL-A5YP      | SBDS    | cna | gain    | TCGA       |
| MB-0346           | SBDS    | cna | hetloss | METABRIC   |
| MB-2827           | SBDS    | cna | hetloss | METABRIC   |
| MB-6060           | SBDS    | cna | hetloss | METABRIC   |
| MB-7048           | SBDS    | cna | hetloss | METABRIC   |
| PD11327           | SBDS    | cna | homdel  | BASIS      |
| PD13296           | SBDS    | cna | hetloss | BASIS      |
| PD23562           | SBDS    | cna | gain    | BASIS      |

|              |       |     |         |          |
|--------------|-------|-----|---------|----------|
| PD23574      | SBDS  | cna | gain    | BASIS    |
| PD24186      | SBDS  | cna | gain    | BASIS    |
| PD24202      | SBDS  | cna | hetloss | BASIS    |
| PD24206      | SBDS  | cna | hetloss | BASIS    |
| PD3890       | SBDS  | cna | hetloss | BASIS    |
| PD3905       | SBDS  | cna | gain    | BASIS    |
| PD4006       | SBDS  | cna | gain    | BASIS    |
| PD4107       | SBDS  | cna | gain    | BASIS    |
| PD4826       | SBDS  | cna | gain    | BASIS    |
| PD4967       | SBDS  | cna | hetloss | BASIS    |
| PD5930       | SBDS  | cna | gain    | BASIS    |
| PD5935       | SBDS  | cna | gain    | BASIS    |
| PD5945       | SBDS  | cna | amp     | BASIS    |
| PD5948       | SBDS  | cna | gain    | BASIS    |
| PD6406       | SBDS  | cna | hetloss | BASIS    |
| PD7215       | SBDS  | cna | gain    | BASIS    |
| PD8621       | SBDS  | cna | gain    | BASIS    |
| PD9004       | SBDS  | cna | hetloss | BASIS    |
| PD9702       | SBDS  | cna | gain    | BASIS    |
| TCGA-A2-A25B | SIN3A | cna | gain    | TCGA     |
| TCGA-AN-A0XU | SIN3A | cna | amp     | TCGA     |
| TCGA-AO-A0JL | SIN3A | cna | hetloss | TCGA     |
| TCGA-BH-A0AW | SIN3A | cna | hetloss | TCGA     |
| TCGA-BH-A0C0 | SIN3A | cna | hetloss | TCGA     |
| TCGA-D8-A27M | SIN3A | cna | hetloss | TCGA     |
| TCGA-E2-A1L7 | SIN3A | cna | gain    | TCGA     |
| TCGA-LL-A5YP | SIN3A | cna | hetloss | TCGA     |
| MB-0346      | SIN3A | cna | hetloss | METABRIC |
| MB-5070      | SIN3A | cna | hetloss | METABRIC |
| MB-6060      | SIN3A | cna | hetloss | METABRIC |
| MB-7038      | SIN3A | cna | gain    | METABRIC |
| PD10014      | SIN3A | cna | gain    | BASIS    |
| PD11327      | SIN3A | cna | gain    | BASIS    |
| PD13296      | SIN3A | cna | homdel  | BASIS    |
| PD13299      | SIN3A | cna | gain    | BASIS    |
| PD22355      | SIN3A | cna | hetloss | BASIS    |
| PD23562      | SIN3A | cna | gain    | BASIS    |
| PD23574      | SIN3A | cna | gain    | BASIS    |
| PD23578      | SIN3A | cna | gain    | BASIS    |
| PD24202      | SIN3A | cna | hetloss | BASIS    |
| PD24206      | SIN3A | cna | gain    | BASIS    |
| PD3890       | SIN3A | cna | hetloss | BASIS    |
| PD3905       | SIN3A | cna | gain    | BASIS    |
| PD4006       | SIN3A | cna | gain    | BASIS    |
| PD5945       | SIN3A | cna | gain    | BASIS    |
| PD5948       | SIN3A | cna | hetloss | BASIS    |
| PD7067       | SIN3A | cna | gain    | BASIS    |



|              |         |     |         |          |
|--------------|---------|-----|---------|----------|
| PD7215       | SIN3A   | cna | hetloss | BASIS    |
| PD8621       | SIN3A   | cna | gain    | BASIS    |
| PD8980       | SIN3A   | cna | gain    | BASIS    |
| PD9585       | SIN3A   | cna | hetloss | BASIS    |
| PD9702       | SIN3A   | cna | gain    | BASIS    |
| TCGA-AO-A0JL | SMARCA4 | cna | gain    | TCGA     |
| TCGA-BH-A0C0 | SMARCA4 | cna | gain    | TCGA     |
| TCGA-BH-A1FU | SMARCA4 | cna | hetloss | TCGA     |
| TCGA-C8-A12L | SMARCA4 | cna | amp     | TCGA     |
| TCGA-D8-A27M | SMARCA4 | cna | hetloss | TCGA     |
| TCGA-EW-A10X | SMARCA4 | cna | hetloss | TCGA     |
| TCGA-LL-A5YP | SMARCA4 | cna | hetloss | TCGA     |
| MB-0346      | SMARCA4 | cna | hetloss | METABRIC |
| MB-2827      | SMARCA4 | cna | hetloss | METABRIC |
| MB-5070      | SMARCA4 | cna | hetloss | METABRIC |
| MB-5465      | SMARCA4 | cna | gain    | METABRIC |
| MB-6098      | SMARCA4 | cna | hetloss | METABRIC |
| MB-7038      | SMARCA4 | cna | hetloss | METABRIC |
| MB-0420      | SMARCA4 | cna | hetloss | METABRIC |
| PD11327      | SMARCA4 | cna | homdel  | BASIS    |
| PD13771      | SMARCA4 | cna | gain    | BASIS    |
| PD14442      | SMARCA4 | cna | hetloss | BASIS    |
| PD23562      | SMARCA4 | cna | gain    | BASIS    |
| PD23574      | SMARCA4 | cna | gain    | BASIS    |
| PD24206      | SMARCA4 | cna | homdel  | BASIS    |
| PD3905       | SMARCA4 | cna | gain    | BASIS    |
| PD4006       | SMARCA4 | cna | gain    | BASIS    |
| PD4107       | SMARCA4 | cna | gain    | BASIS    |
| PD4826       | SMARCA4 | cna | gain    | BASIS    |
| PD4967       | SMARCA4 | cna | hetloss | BASIS    |
| PD5930       | SMARCA4 | cna | gain    | BASIS    |
| PD5935       | SMARCA4 | cna | gain    | BASIS    |
| PD5945       | SMARCA4 | cna | amp     | BASIS    |
| PD5948       | SMARCA4 | cna | gain    | BASIS    |
| PD7067       | SMARCA4 | cna | gain    | BASIS    |
| PD7215       | SMARCA4 | cna | amp     | BASIS    |
| PD8621       | SMARCA4 | cna | gain    | BASIS    |
| PD9702       | SMARCA4 | cna | gain    | BASIS    |
| TCGA-A2-A25B | SMARCB1 | cna | hetloss | TCGA     |
| TCGA-BH-A0C0 | SMARCB1 | cna | gain    | TCGA     |
| TCGA-BH-A1FU | SMARCB1 | cna | gain    | TCGA     |
| TCGA-C8-A12L | SMARCB1 | cna | hetloss | TCGA     |
| TCGA-E9-A1NC | SMARCB1 | cna | gain    | TCGA     |
| TCGA-LL-A5YP | SMARCB1 | cna | gain    | TCGA     |
| MB-0346      | SMARCB1 | cna | gain    | METABRIC |
| MB-6060      | SMARCB1 | cna | gain    | METABRIC |
| MB-6098      | SMARCB1 | cna | hetloss | METABRIC |

|              |         |     |         |          |
|--------------|---------|-----|---------|----------|
| PD11327      | SMARCB1 | cna | gain    | BASIS    |
| PD11742      | SMARCB1 | cna | hetloss | BASIS    |
| PD13296      | SMARCB1 | cna | gain    | BASIS    |
| PD13297      | SMARCB1 | cna | gain    | BASIS    |
| PD14442      | SMARCB1 | cna | hetloss | BASIS    |
| PD22355      | SMARCB1 | cna | hetloss | BASIS    |
| PD23562      | SMARCB1 | cna | gain    | BASIS    |
| PD23574      | SMARCB1 | cna | gain    | BASIS    |
| PD23578      | SMARCB1 | cna | hetloss | BASIS    |
| PD24206      | SMARCB1 | cna | hetloss | BASIS    |
| PD3905       | SMARCB1 | cna | gain    | BASIS    |
| PD4006       | SMARCB1 | cna | gain    | BASIS    |
| PD4107       | SMARCB1 | cna | gain    | BASIS    |
| PD4826       | SMARCB1 | cna | gain    | BASIS    |
| PD4967       | SMARCB1 | cna | hetloss | BASIS    |
| PD5930       | SMARCB1 | cna | gain    | BASIS    |
| PD5935       | SMARCB1 | cna | gain    | BASIS    |
| PD5945       | SMARCB1 | cna | amp     | BASIS    |
| PD5948       | SMARCB1 | cna | gain    | BASIS    |
| PD7067       | SMARCB1 | cna | gain    | BASIS    |
| PD7215       | SMARCB1 | cna | gain    | BASIS    |
| PD8621       | SMARCB1 | cna | gain    | BASIS    |
| PD9004       | SMARCB1 | cna | gain    | BASIS    |
| PD9702       | SMARCB1 | cna | gain    | BASIS    |
| TCGA-A2-A25B | SYK     | cna | gain    | TCGA     |
| TCGA-AN-A0XU | SYK     | cna | hetloss | TCGA     |
| TCGA-AO-A0JL | SYK     | cna | hetloss | TCGA     |
| TCGA-BH-A1FU | SYK     | cna | hetloss | TCGA     |
| TCGA-C8-A12L | SYK     | cna | hetloss | TCGA     |
| TCGA-E9-A1NC | SYK     | cna | hetloss | TCGA     |
| TCGA-LL-A5YP | SYK     | cna | hetloss | TCGA     |
| MB-0346      | SYK     | cna | hetloss | METABRIC |
| MB-5070      | SYK     | cna | hetloss | METABRIC |
| MB-5107      | SYK     | cna | hetloss | METABRIC |
| MB-6098      | SYK     | cna | hetloss | METABRIC |
| MB-7038      | SYK     | cna | hetloss | METABRIC |
| MB-0420      | SYK     | cna | hetloss | METABRIC |
| MTS-T0064    | SYK     | cna | gain    | METABRIC |
| PD11327      | SYK     | cna | gain    | BASIS    |
| PD13771      | SYK     | cna | hetloss | BASIS    |
| PD23562      | SYK     | cna | gain    | BASIS    |
| PD23578      | SYK     | cna | hetloss | BASIS    |
| PD24186      | SYK     | cna | amp     | BASIS    |
| PD24202      | SYK     | cna | hetloss | BASIS    |
| PD24206      | SYK     | cna | gain    | BASIS    |
| PD3905       | SYK     | cna | gain    | BASIS    |
| PD4005       | SYK     | cna | gain    | BASIS    |

|              |       |     |         |          |
|--------------|-------|-----|---------|----------|
| PD4006       | SYK   | cna | gain    | BASIS    |
| PD4107       | SYK   | cna | gain    | BASIS    |
| PD5945       | SYK   | cna | amp     | BASIS    |
| PD5948       | SYK   | cna | gain    | BASIS    |
| PD6731       | SYK   | cna | hetloss | BASIS    |
| PD7067       | SYK   | cna | gain    | BASIS    |
| PD7215       | SYK   | cna | gain    | BASIS    |
| PD8621       | SYK   | cna | gain    | BASIS    |
| PD9004       | SYK   | cna | gain    | BASIS    |
| PD9585       | SYK   | cna | hetloss | BASIS    |
| TCGA-A2-A25B | TCEA1 | cna | gain    | TCGA     |
| TCGA-AO-A0JL | TCEA1 | cna | amp     | TCGA     |
| TCGA-BH-A0AW | TCEA1 | cna | gain    | TCGA     |
| TCGA-BH-A0C0 | TCEA1 | cna | gain    | TCGA     |
| TCGA-BH-A18R | TCEA1 | cna | homdel  | TCGA     |
| TCGA-BH-A1FU | TCEA1 | cna | gain    | TCGA     |
| TCGA-D8-A27M | TCEA1 | cna | amp     | TCGA     |
| TCGA-E9-A1NC | TCEA1 | cna | amp     | TCGA     |
| MB-0346      | TCEA1 | cna | gain    | METABRIC |
| MB-5465      | TCEA1 | cna | hetloss | METABRIC |
| MB-6060      | TCEA1 | cna | amp     | METABRIC |
| MB-6098      | TCEA1 | cna | gain    | METABRIC |
| PD10014      | TCEA1 | cna | amp     | BASIS    |
| PD11327      | TCEA1 | cna | amp     | BASIS    |
| PD13296      | TCEA1 | cna | homdel  | BASIS    |
| PD13299      | TCEA1 | cna | gain    | BASIS    |
| PD23562      | TCEA1 | cna | gain    | BASIS    |
| PD23574      | TCEA1 | cna | gain    | BASIS    |
| PD23578      | TCEA1 | cna | hetloss | BASIS    |
| PD24186      | TCEA1 | cna | gain    | BASIS    |
| PD3905       | TCEA1 | cna | gain    | BASIS    |
| PD4005       | TCEA1 | cna | hetloss | BASIS    |
| PD4006       | TCEA1 | cna | gain    | BASIS    |
| PD4826       | TCEA1 | cna | amp     | BASIS    |
| PD5935       | TCEA1 | cna | gain    | BASIS    |
| PD5945       | TCEA1 | cna | gain    | BASIS    |
| PD7067       | TCEA1 | cna | amp     | BASIS    |
| PD7215       | TCEA1 | cna | amp     | BASIS    |
| PD8621       | TCEA1 | cna | gain    | BASIS    |
| PD8980       | TCEA1 | cna | gain    | BASIS    |
| PD9004       | TCEA1 | cna | gain    | BASIS    |
| PD9585       | TCEA1 | cna | hetloss | BASIS    |
| PD9702       | TCEA1 | cna | gain    | BASIS    |
| TCGA-AO-A0JL | TFPT  | cna | hetloss | TCGA     |
| TCGA-BH-A0AW | TFPT  | cna | gain    | TCGA     |
| TCGA-BH-A0C0 | TFPT  | cna | hetloss | TCGA     |
| TCGA-BH-A1FU | TFPT  | cna | hetloss | TCGA     |

|              |      |     |         |          |
|--------------|------|-----|---------|----------|
| TCGA-D8-A27M | TFPT | cna | hetloss | TCGA     |
| TCGA-EW-A10X | TFPT | cna | hetloss | TCGA     |
| TCGA-LL-A5YP | TFPT | cna | gain    | TCGA     |
| MB-0346      | TFPT | cna | hetloss | METABRIC |
| MB-2827      | TFPT | cna | hetloss | METABRIC |
| MB-6098      | TFPT | cna | hetloss | METABRIC |
| MB-7048      | TFPT | cna | gain    | METABRIC |
| PD11327      | TFPT | cna | gain    | BASIS    |
| PD13296      | TFPT | cna | gain    | BASIS    |
| PD13299      | TFPT | cna | gain    | BASIS    |
| PD13771      | TFPT | cna | hetloss | BASIS    |
| PD23562      | TFPT | cna | gain    | BASIS    |
| PD23574      | TFPT | cna | gain    | BASIS    |
| PD24186      | TFPT | cna | gain    | BASIS    |
| PD24206      | TFPT | cna | hetloss | BASIS    |
| PD3890       | TFPT | cna | hetloss | BASIS    |
| PD3905       | TFPT | cna | gain    | BASIS    |
| PD4006       | TFPT | cna | gain    | BASIS    |
| PD4107       | TFPT | cna | gain    | BASIS    |
| PD4826       | TFPT | cna | gain    | BASIS    |
| PD5935       | TFPT | cna | gain    | BASIS    |
| PD5945       | TFPT | cna | gain    | BASIS    |
| PD5948       | TFPT | cna | gain    | BASIS    |
| PD6406       | TFPT | cna | gain    | BASIS    |
| PD7067       | TFPT | cna | gain    | BASIS    |
| PD7215       | TFPT | cna | gain    | BASIS    |
| PD8621       | TFPT | cna | gain    | BASIS    |
| PD8980       | TFPT | cna | hetloss | BASIS    |
| PD9585       | TFPT | cna | gain    | BASIS    |
| TCGA-A2-A25B | TLL2 | cna | hetloss | TCGA     |
| TCGA-AN-A0XU | TLL2 | cna | hetloss | TCGA     |
| TCGA-AO-A0JL | TLL2 | cna | hetloss | TCGA     |
| TCGA-BH-A18R | TLL2 | cna | gain    | TCGA     |
| TCGA-C8-A12L | TLL2 | cna | gain    | TCGA     |
| TCGA-D8-A27M | TLL2 | cna | hetloss | TCGA     |
| TCGA-E2-A1L7 | TLL2 | cna | hetloss | TCGA     |
| MB-2827      | TLL2 | cna | hetloss | METABRIC |
| MB-5070      | TLL2 | cna | hetloss | METABRIC |
| MB-6060      | TLL2 | cna | hetloss | METABRIC |
| MB-6098      | TLL2 | cna | hetloss | METABRIC |
| MB-7038      | TLL2 | cna | hetloss | METABRIC |
| MB-7048      | TLL2 | cna | hetloss | METABRIC |
| PD10014      | TLL2 | cna | hetloss | BASIS    |
| PD11742      | TLL2 | cna | hetloss | BASIS    |
| PD13296      | TLL2 | cna | hetloss | BASIS    |
| PD22355      | TLL2 | cna | hetloss | BASIS    |
| PD23562      | TLL2 | cna | gain    | BASIS    |

|              |      |     |         |          |
|--------------|------|-----|---------|----------|
| PD23574      | TLL2 | cna | gain    | BASIS    |
| PD23578      | TLL2 | cna | hetloss | BASIS    |
| PD24202      | TLL2 | cna | hetloss | BASIS    |
| PD3905       | TLL2 | cna | gain    | BASIS    |
| PD4006       | TLL2 | cna | gain    | BASIS    |
| PD4107       | TLL2 | cna | gain    | BASIS    |
| PD5935       | TLL2 | cna | hetloss | BASIS    |
| PD6406       | TLL2 | cna | hetloss | BASIS    |
| PD6731       | TLL2 | cna | hetloss | BASIS    |
| PD7067       | TLL2 | cna | gain    | BASIS    |
| PD7215       | TLL2 | cna | gain    | BASIS    |
| PD8621       | TLL2 | cna | gain    | BASIS    |
| PD8980       | TLL2 | cna | hetloss | BASIS    |
| PD9004       | TLL2 | cna | gain    | BASIS    |
| PD9585       | TLL2 | cna | hetloss | BASIS    |
| TCGA-AN-A0XU | TLX3 | cna | hetloss | TCGA     |
| TCGA-AO-A0JL | TLX3 | cna | gain    | TCGA     |
| TCGA-BH-A0C0 | TLX3 | cna | hetloss | TCGA     |
| TCGA-BH-A1FU | TLX3 | cna | hetloss | TCGA     |
| TCGA-C8-A12L | TLX3 | cna | hetloss | TCGA     |
| TCGA-D8-A27M | TLX3 | cna | hetloss | TCGA     |
| TCGA-E2-A1L7 | TLX3 | cna | hetloss | TCGA     |
| TCGA-LL-A5YP | TLX3 | cna | hetloss | TCGA     |
| MB-5070      | TLX3 | cna | hetloss | METABRIC |
| MB-5465      | TLX3 | cna | hetloss | METABRIC |
| MB-6098      | TLX3 | cna | hetloss | METABRIC |
| MB-0420      | TLX3 | cna | hetloss | METABRIC |
| PD10014      | TLX3 | cna | hetloss | BASIS    |
| PD13296      | TLX3 | cna | hetloss | BASIS    |
| PD13297      | TLX3 | cna | hetloss | BASIS    |
| PD13771      | TLX3 | cna | gain    | BASIS    |
| PD22355      | TLX3 | cna | hetloss | BASIS    |
| PD23578      | TLX3 | cna | hetloss | BASIS    |
| PD24186      | TLX3 | cna | gain    | BASIS    |
| PD24202      | TLX3 | cna | hetloss | BASIS    |
| PD24206      | TLX3 | cna | gain    | BASIS    |
| PD24337      | TLX3 | cna | hetloss | BASIS    |
| PD3890       | TLX3 | cna | hetloss | BASIS    |
| PD3905       | TLX3 | cna | gain    | BASIS    |
| PD4005       | TLX3 | cna | hetloss | BASIS    |
| PD4006       | TLX3 | cna | gain    | BASIS    |
| PD4107       | TLX3 | cna | hetloss | BASIS    |
| PD4826       | TLX3 | cna | gain    | BASIS    |
| PD5945       | TLX3 | cna | gain    | BASIS    |
| PD6406       | TLX3 | cna | hetloss | BASIS    |
| PD6413       | TLX3 | cna | hetloss | BASIS    |
| PD7067       | TLX3 | cna | gain    | BASIS    |

|              |       |     |         |          |
|--------------|-------|-----|---------|----------|
| PD8980       | TLX3  | cna | gain    | BASIS    |
| TCGA-A2-A25B | TRIM7 | cna | hetloss | TCGA     |
| TCGA-AN-A0XU | TRIM7 | cna | hetloss | TCGA     |
| TCGA-AO-A0JL | TRIM7 | cna | hetloss | TCGA     |
| TCGA-BH-A0C0 | TRIM7 | cna | hetloss | TCGA     |
| TCGA-BH-A1FU | TRIM7 | cna | amp     | TCGA     |
| TCGA-C8-A12L | TRIM7 | cna | hetloss | TCGA     |
| TCGA-D8-A27M | TRIM7 | cna | hetloss | TCGA     |
| TCGA-E2-A1L7 | TRIM7 | cna | hetloss | TCGA     |
| MB-5070      | TRIM7 | cna | hetloss | METABRIC |
| MB-5465      | TRIM7 | cna | gain    | METABRIC |
| MB-6098      | TRIM7 | cna | hetloss | METABRIC |
| MB-7048      | TRIM7 | cna | gain    | METABRIC |
| PD10014      | TRIM7 | cna | hetloss | BASIS    |
| PD13296      | TRIM7 | cna | hetloss | BASIS    |
| PD13297      | TRIM7 | cna | hetloss | BASIS    |
| PD13771      | TRIM7 | cna | hetloss | BASIS    |
| PD22355      | TRIM7 | cna | hetloss | BASIS    |
| PD23562      | TRIM7 | cna | amp     | BASIS    |
| PD23574      | TRIM7 | cna | gain    | BASIS    |
| PD23578      | TRIM7 | cna | hetloss | BASIS    |
| PD24186      | TRIM7 | cna | gain    | BASIS    |
| PD24206      | TRIM7 | cna | gain    | BASIS    |
| PD3905       | TRIM7 | cna | gain    | BASIS    |
| PD4005       | TRIM7 | cna | hetloss | BASIS    |
| PD4006       | TRIM7 | cna | gain    | BASIS    |
| PD4107       | TRIM7 | cna | hetloss | BASIS    |
| PD4826       | TRIM7 | cna | gain    | BASIS    |
| PD5945       | TRIM7 | cna | amp     | BASIS    |
| PD5948       | TRIM7 | cna | hetloss | BASIS    |
| PD7067       | TRIM7 | cna | gain    | BASIS    |
| PD7215       | TRIM7 | cna | amp     | BASIS    |
| PD8980       | TRIM7 | cna | gain    | BASIS    |
| PD9702       | TRIM7 | cna | gain    | BASIS    |
| TCGA-A2-A25B | TRRAP | cna | gain    | TCGA     |
| TCGA-AN-A0XU | TRRAP | cna | hetloss | TCGA     |
| TCGA-AO-A0JL | TRRAP | cna | gain    | TCGA     |
| TCGA-BH-A0AW | TRRAP | cna | gain    | TCGA     |
| TCGA-C8-A12L | TRRAP | cna | hetloss | TCGA     |
| TCGA-D8-A27M | TRRAP | cna | gain    | TCGA     |
| TCGA-E2-A1L7 | TRRAP | cna | hetloss | TCGA     |
| TCGA-E9-A1NC | TRRAP | cna | gain    | TCGA     |
| TCGA-LL-A5YP | TRRAP | cna | gain    | TCGA     |
| MB-0346      | TRRAP | cna | hetloss | METABRIC |
| MB-2827      | TRRAP | cna | hetloss | METABRIC |
| PD11327      | TRRAP | cna | gain    | BASIS    |
| PD13296      | TRRAP | cna | hetloss | BASIS    |

|              |       |     |         |          |
|--------------|-------|-----|---------|----------|
| PD22355      | TRRAP | cna | hetloss | BASIS    |
| PD23574      | TRRAP | cna | gain    | BASIS    |
| PD23578      | TRRAP | cna | gain    | BASIS    |
| PD24186      | TRRAP | cna | amp     | BASIS    |
| PD24206      | TRRAP | cna | homdel  | BASIS    |
| PD3890       | TRRAP | cna | hetloss | BASIS    |
| PD3905       | TRRAP | cna | gain    | BASIS    |
| PD4006       | TRRAP | cna | amp     | BASIS    |
| PD4107       | TRRAP | cna | gain    | BASIS    |
| PD4826       | TRRAP | cna | gain    | BASIS    |
| PD5930       | TRRAP | cna | gain    | BASIS    |
| PD5935       | TRRAP | cna | gain    | BASIS    |
| PD5945       | TRRAP | cna | amp     | BASIS    |
| PD5948       | TRRAP | cna | gain    | BASIS    |
| PD7067       | TRRAP | cna | amp     | BASIS    |
| PD7215       | TRRAP | cna | gain    | BASIS    |
| PD8621       | TRRAP | cna | gain    | BASIS    |
| PD9004       | TRRAP | cna | amp     | BASIS    |
| PD9585       | TRRAP | cna | hetloss | BASIS    |
| PD9702       | TRRAP | cna | gain    | BASIS    |
| TCGA-A2-A25B | TSC1  | cna | gain    | TCGA     |
| TCGA-AN-A0XU | TSC1  | cna | hetloss | TCGA     |
| TCGA-AO-A0JL | TSC1  | cna | hetloss | TCGA     |
| TCGA-BH-A0C0 | TSC1  | cna | gain    | TCGA     |
| TCGA-C8-A12L | TSC1  | cna | gain    | TCGA     |
| TCGA-E2-A1L7 | TSC1  | cna | gain    | TCGA     |
| TCGA-E9-A1NC | TSC1  | cna | hetloss | TCGA     |
| TCGA-LL-A5YP | TSC1  | cna | hetloss | TCGA     |
| MB-0346      | TSC1  | cna | hetloss | METABRIC |
| MB-5070      | TSC1  | cna | hetloss | METABRIC |
| MB-7038      | TSC1  | cna | hetloss | METABRIC |
| MB-0420      | TSC1  | cna | hetloss | METABRIC |
| PD10014      | TSC1  | cna | gain    | BASIS    |
| PD11327      | TSC1  | cna | gain    | BASIS    |
| PD13299      | TSC1  | cna | gain    | BASIS    |
| PD22355      | TSC1  | cna | gain    | BASIS    |
| PD24186      | TSC1  | cna | gain    | BASIS    |
| PD24202      | TSC1  | cna | hetloss | BASIS    |
| PD24206      | TSC1  | cna | gain    | BASIS    |
| PD24337      | TSC1  | cna | hetloss | BASIS    |
| PD3890       | TSC1  | cna | hetloss | BASIS    |
| PD3905       | TSC1  | cna | gain    | BASIS    |
| PD4005       | TSC1  | cna | hetloss | BASIS    |
| PD4006       | TSC1  | cna | gain    | BASIS    |
| PD4107       | TSC1  | cna | hetloss | BASIS    |
| PD5945       | TSC1  | cna | gain    | BASIS    |
| PD5948       | TSC1  | cna | gain    | BASIS    |

|              |       |     |         |          |
|--------------|-------|-----|---------|----------|
| PD6406       | TSC1  | cna | hetloss | BASIS    |
| PD6731       | TSC1  | cna | hetloss | BASIS    |
| PD7067       | TSC1  | cna | gain    | BASIS    |
| PD7215       | TSC1  | cna | gain    | BASIS    |
| PD8621       | TSC1  | cna | gain    | BASIS    |
| PD9004       | TSC1  | cna | hetloss | BASIS    |
| TCGA-AN-A0XU | TSHZ3 | cna | gain    | TCGA     |
| TCGA-AO-A0JL | TSHZ3 | cna | gain    | TCGA     |
| TCGA-BH-A0AW | TSHZ3 | cna | gain    | TCGA     |
| TCGA-BH-A0C0 | TSHZ3 | cna | hetloss | TCGA     |
| TCGA-BH-A1FU | TSHZ3 | cna | hetloss | TCGA     |
| TCGA-C8-A12L | TSHZ3 | cna | gain    | TCGA     |
| TCGA-D8-A27M | TSHZ3 | cna | amp     | TCGA     |
| TCGA-E9-A1NC | TSHZ3 | cna | hetloss | TCGA     |
| TCGA-EW-A10X | TSHZ3 | cna | hetloss | TCGA     |
| TCGA-LL-A5YP | TSHZ3 | cna | gain    | TCGA     |
| MB-0346      | TSHZ3 | cna | hetloss | METABRIC |
| MB-6098      | TSHZ3 | cna | gain    | METABRIC |
| MB-7038      | TSHZ3 | cna | gain    | METABRIC |
| PD10014      | TSHZ3 | cna | hetloss | BASIS    |
| PD11327      | TSHZ3 | cna | gain    | BASIS    |
| PD13296      | TSHZ3 | cna | gain    | BASIS    |
| PD13299      | TSHZ3 | cna | gain    | BASIS    |
| PD23562      | TSHZ3 | cna | gain    | BASIS    |
| PD23574      | TSHZ3 | cna | amp     | BASIS    |
| PD24186      | TSHZ3 | cna | gain    | BASIS    |
| PD24206      | TSHZ3 | cna | gain    | BASIS    |
| PD3905       | TSHZ3 | cna | gain    | BASIS    |
| PD4006       | TSHZ3 | cna | gain    | BASIS    |
| PD4826       | TSHZ3 | cna | gain    | BASIS    |
| PD4967       | TSHZ3 | cna | gain    | BASIS    |
| PD5935       | TSHZ3 | cna | gain    | BASIS    |
| PD5945       | TSHZ3 | cna | amp     | BASIS    |
| PD5948       | TSHZ3 | cna | gain    | BASIS    |
| PD7067       | TSHZ3 | cna | gain    | BASIS    |
| PD7215       | TSHZ3 | cna | gain    | BASIS    |
| PD8621       | TSHZ3 | cna | gain    | BASIS    |
| PD8980       | TSHZ3 | cna | hetloss | BASIS    |
| PD9702       | TSHZ3 | cna | gain    | BASIS    |
| TCGA-A2-A25B | WIF1  | cna | gain    | TCGA     |
| TCGA-AO-A0JL | WIF1  | cna | hetloss | TCGA     |
| TCGA-BH-A18R | WIF1  | cna | gain    | TCGA     |
| TCGA-BH-A1FU | WIF1  | cna | hetloss | TCGA     |
| TCGA-C8-A12L | WIF1  | cna | gain    | TCGA     |
| TCGA-E2-A1L7 | WIF1  | cna | hetloss | TCGA     |
| TCGA-LL-A5YP | WIF1  | cna | hetloss | TCGA     |
| MB-0346      | WIF1  | cna | gain    | METABRIC |



|              |       |     |         |          |
|--------------|-------|-----|---------|----------|
| MB-2827      | WIF1  | cna | hetloss | METABRIC |
| MB-5107      | WIF1  | cna | gain    | METABRIC |
| MB-5465      | WIF1  | cna | gain    | METABRIC |
| MB-6098      | WIF1  | cna | gain    | METABRIC |
| MB-0420      | WIF1  | cna | hetloss | METABRIC |
| MTS-T0064    | WIF1  | cna | gain    | METABRIC |
| PD10014      | WIF1  | cna | gain    | BASIS    |
| PD22355      | WIF1  | cna | hetloss | BASIS    |
| PD23578      | WIF1  | cna | gain    | BASIS    |
| PD24186      | WIF1  | cna | gain    | BASIS    |
| PD24202      | WIF1  | cna | hetloss | BASIS    |
| PD24206      | WIF1  | cna | gain    | BASIS    |
| PD24337      | WIF1  | cna | gain    | BASIS    |
| PD3890       | WIF1  | cna | hetloss | BASIS    |
| PD3905       | WIF1  | cna | gain    | BASIS    |
| PD4107       | WIF1  | cna | gain    | BASIS    |
| PD4826       | WIF1  | cna | gain    | BASIS    |
| PD5945       | WIF1  | cna | gain    | BASIS    |
| PD6406       | WIF1  | cna | hetloss | BASIS    |
| PD6413       | WIF1  | cna | hetloss | BASIS    |
| PD6731       | WIF1  | cna | hetloss | BASIS    |
| PD7067       | WIF1  | cna | gain    | BASIS    |
| PD8621       | WIF1  | cna | hetloss | BASIS    |
| PD9585       | WIF1  | cna | hetloss | BASIS    |
| PD9702       | WIF1  | cna | gain    | BASIS    |
| TCGA-AN-A0XU | ZNF24 | cna | hetloss | TCGA     |
| TCGA-AO-A0JL | ZNF24 | cna | gain    | TCGA     |
| TCGA-BH-A0AW | ZNF24 | cna | hetloss | TCGA     |
| TCGA-BH-A0C0 | ZNF24 | cna | gain    | TCGA     |
| TCGA-C8-A12L | ZNF24 | cna | gain    | TCGA     |
| TCGA-D8-A27M | ZNF24 | cna | hetloss | TCGA     |
| TCGA-E2-A1L7 | ZNF24 | cna | gain    | TCGA     |
| TCGA-LL-A5YP | ZNF24 | cna | gain    | TCGA     |
| MB-0346      | ZNF24 | cna | hetloss | METABRIC |
| PD10014      | ZNF24 | cna | hetloss | BASIS    |
| PD11327      | ZNF24 | cna | gain    | BASIS    |
| PD13296      | ZNF24 | cna | hetloss | BASIS    |
| PD13297      | ZNF24 | cna | gain    | BASIS    |
| PD13299      | ZNF24 | cna | gain    | BASIS    |
| PD23574      | ZNF24 | cna | hetloss | BASIS    |
| PD23578      | ZNF24 | cna | gain    | BASIS    |
| PD24186      | ZNF24 | cna | gain    | BASIS    |
| PD24202      | ZNF24 | cna | hetloss | BASIS    |
| PD24206      | ZNF24 | cna | gain    | BASIS    |
| PD24337      | ZNF24 | cna | gain    | BASIS    |
| PD3905       | ZNF24 | cna | gain    | BASIS    |
| PD4006       | ZNF24 | cna | gain    | BASIS    |

|              |        |     |         |          |
|--------------|--------|-----|---------|----------|
| PD4107       | ZNF24  | cna | gain    | BASIS    |
| PD4967       | ZNF24  | cna | hetloss | BASIS    |
| PD5930       | ZNF24  | cna | gain    | BASIS    |
| PD5945       | ZNF24  | cna | gain    | BASIS    |
| PD5948       | ZNF24  | cna | gain    | BASIS    |
| PD6406       | ZNF24  | cna | gain    | BASIS    |
| PD7067       | ZNF24  | cna | amp     | BASIS    |
| PD7215       | ZNF24  | cna | gain    | BASIS    |
| PD8980       | ZNF24  | cna | hetloss | BASIS    |
| PD9004       | ZNF24  | cna | hetloss | BASIS    |
| PD9702       | ZNF24  | cna | gain    | BASIS    |
| TCGA-AO-A0JL | ZNF331 | cna | hetloss | TCGA     |
| TCGA-BH-A0AW | ZNF331 | cna | gain    | TCGA     |
| TCGA-BH-A0C0 | ZNF331 | cna | hetloss | TCGA     |
| TCGA-BH-A1FU | ZNF331 | cna | hetloss | TCGA     |
| TCGA-D8-A27M | ZNF331 | cna | hetloss | TCGA     |
| TCGA-EW-A10X | ZNF331 | cna | hetloss | TCGA     |
| TCGA-LL-A5YP | ZNF331 | cna | gain    | TCGA     |
| MB-0346      | ZNF331 | cna | hetloss | METABRIC |
| MB-2827      | ZNF331 | cna | hetloss | METABRIC |
| MB-6098      | ZNF331 | cna | hetloss | METABRIC |
| MB-7048      | ZNF331 | cna | gain    | METABRIC |
| PD11327      | ZNF331 | cna | gain    | BASIS    |
| PD13296      | ZNF331 | cna | gain    | BASIS    |
| PD13299      | ZNF331 | cna | gain    | BASIS    |
| PD13771      | ZNF331 | cna | hetloss | BASIS    |
| PD23562      | ZNF331 | cna | gain    | BASIS    |
| PD23574      | ZNF331 | cna | gain    | BASIS    |
| PD24186      | ZNF331 | cna | gain    | BASIS    |
| PD24206      | ZNF331 | cna | hetloss | BASIS    |
| PD3890       | ZNF331 | cna | hetloss | BASIS    |
| PD3905       | ZNF331 | cna | gain    | BASIS    |
| PD4006       | ZNF331 | cna | gain    | BASIS    |
| PD4107       | ZNF331 | cna | gain    | BASIS    |
| PD4826       | ZNF331 | cna | gain    | BASIS    |
| PD5935       | ZNF331 | cna | gain    | BASIS    |
| PD5945       | ZNF331 | cna | gain    | BASIS    |
| PD5948       | ZNF331 | cna | gain    | BASIS    |
| PD6406       | ZNF331 | cna | gain    | BASIS    |
| PD7067       | ZNF331 | cna | gain    | BASIS    |
| PD7215       | ZNF331 | cna | gain    | BASIS    |
| PD8621       | ZNF331 | cna | gain    | BASIS    |
| PD8980       | ZNF331 | cna | hetloss | BASIS    |
| PD9585       | ZNF331 | cna | gain    | BASIS    |
| TCGA-AO-A0JL | ACKR3  | cna | gain    | TCGA     |
| TCGA-BH-A0AW | ACKR3  | cna | hetloss | TCGA     |
| TCGA-C8-A12L | ACKR3  | cna | hetloss | TCGA     |

|              |       |     |         |          |
|--------------|-------|-----|---------|----------|
| TCGA-D8-A27M | ACKR3 | cna | gain    | TCGA     |
| TCGA-E2-A1L7 | ACKR3 | cna | hetloss | TCGA     |
| TCGA-E9-A1NC | ACKR3 | cna | hetloss | TCGA     |
| MB-2827      | ACKR3 | cna | hetloss | METABRIC |
| MB-6098      | ACKR3 | cna | hetloss | METABRIC |
| MB-6271      | ACKR3 | cna | hetloss | METABRIC |
| MB-7048      | ACKR3 | cna | hetloss | METABRIC |
| PD10014      | ACKR3 | cna | gain    | BASIS    |
| PD11327      | ACKR3 | cna | gain    | BASIS    |
| PD11742      | ACKR3 | cna | hetloss | BASIS    |
| PD13296      | ACKR3 | cna | hetloss | BASIS    |
| PD13297      | ACKR3 | cna | hetloss | BASIS    |
| PD23578      | ACKR3 | cna | hetloss | BASIS    |
| PD24186      | ACKR3 | cna | gain    | BASIS    |
| PD24206      | ACKR3 | cna | gain    | BASIS    |
| PD3890       | ACKR3 | cna | hetloss | BASIS    |
| PD4005       | ACKR3 | cna | hetloss | BASIS    |
| PD4006       | ACKR3 | cna | gain    | BASIS    |
| PD4967       | ACKR3 | cna | hetloss | BASIS    |
| PD5935       | ACKR3 | cna | gain    | BASIS    |
| PD5945       | ACKR3 | cna | gain    | BASIS    |
| PD5948       | ACKR3 | cna | gain    | BASIS    |
| PD6406       | ACKR3 | cna | hetloss | BASIS    |
| PD6413       | ACKR3 | cna | hetloss | BASIS    |
| PD6731       | ACKR3 | cna | hetloss | BASIS    |
| PD7067       | ACKR3 | cna | gain    | BASIS    |
| PD7215       | ACKR3 | cna | gain    | BASIS    |
| PD8980       | ACKR3 | cna | hetloss | BASIS    |
| PD9585       | ACKR3 | cna | hetloss | BASIS    |
| TCGA-A2-A25B | ACTB  | cna | gain    | TCGA     |
| TCGA-BH-A0AW | ACTB  | cna | gain    | TCGA     |
| TCGA-BH-A0C0 | ACTB  | cna | hetloss | TCGA     |
| TCGA-C8-A12L | ACTB  | cna | gain    | TCGA     |
| TCGA-E2-A1L7 | ACTB  | cna | hetloss | TCGA     |
| TCGA-LL-A5YP | ACTB  | cna | homdel  | TCGA     |
| MB-5465      | ACTB  | cna | gain    | METABRIC |
| MB-6098      | ACTB  | cna | hetloss | METABRIC |
| MB-7038      | ACTB  | cna | hetloss | METABRIC |
| MB-7048      | ACTB  | cna | hetloss | METABRIC |
| MB-0420      | ACTB  | cna | hetloss | METABRIC |
| PD11327      | ACTB  | cna | homdel  | BASIS    |
| PD13297      | ACTB  | cna | hetloss | BASIS    |
| PD22355      | ACTB  | cna | hetloss | BASIS    |
| PD23574      | ACTB  | cna | gain    | BASIS    |
| PD23578      | ACTB  | cna | hetloss | BASIS    |
| PD24202      | ACTB  | cna | gain    | BASIS    |
| PD24206      | ACTB  | cna | homdel  | BASIS    |

|              |         |     |         |          |
|--------------|---------|-----|---------|----------|
| PD24337      | ACTB    | cna | hetloss | BASIS    |
| PD3905       | ACTB    | cna | gain    | BASIS    |
| PD4006       | ACTB    | cna | gain    | BASIS    |
| PD4107       | ACTB    | cna | gain    | BASIS    |
| PD4826       | ACTB    | cna | gain    | BASIS    |
| PD5935       | ACTB    | cna | gain    | BASIS    |
| PD5945       | ACTB    | cna | gain    | BASIS    |
| PD6406       | ACTB    | cna | hetloss | BASIS    |
| PD7067       | ACTB    | cna | gain    | BASIS    |
| PD7215       | ACTB    | cna | gain    | BASIS    |
| PD8621       | ACTB    | cna | gain    | BASIS    |
| PD8980       | ACTB    | cna | hetloss | BASIS    |
| PD9004       | ACTB    | cna | gain    | BASIS    |
| PD9702       | ACTB    | cna | gain    | BASIS    |
| TCGA-A2-A25B | BCR     | cna | hetloss | TCGA     |
| TCGA-BH-A0C0 | BCR     | cna | gain    | TCGA     |
| TCGA-BH-A1FU | BCR     | cna | gain    | TCGA     |
| TCGA-C8-A12L | BCR     | cna | hetloss | TCGA     |
| TCGA-E9-A1NC | BCR     | cna | gain    | TCGA     |
| TCGA-LL-A5YP | BCR     | cna | gain    | TCGA     |
| MB-0346      | BCR     | cna | gain    | METABRIC |
| MB-6060      | BCR     | cna | gain    | METABRIC |
| MB-6098      | BCR     | cna | hetloss | METABRIC |
| PD11327      | BCR     | cna | gain    | BASIS    |
| PD11742      | BCR     | cna | hetloss | BASIS    |
| PD13296      | BCR     | cna | gain    | BASIS    |
| PD13297      | BCR     | cna | gain    | BASIS    |
| PD14442      | BCR     | cna | hetloss | BASIS    |
| PD22355      | BCR     | cna | hetloss | BASIS    |
| PD23562      | BCR     | cna | gain    | BASIS    |
| PD23574      | BCR     | cna | gain    | BASIS    |
| PD23578      | BCR     | cna | hetloss | BASIS    |
| PD24206      | BCR     | cna | hetloss | BASIS    |
| PD3905       | BCR     | cna | gain    | BASIS    |
| PD4006       | BCR     | cna | gain    | BASIS    |
| PD4107       | BCR     | cna | gain    | BASIS    |
| PD4826       | BCR     | cna | gain    | BASIS    |
| PD5930       | BCR     | cna | gain    | BASIS    |
| PD5935       | BCR     | cna | gain    | BASIS    |
| PD5945       | BCR     | cna | amp     | BASIS    |
| PD5948       | BCR     | cna | gain    | BASIS    |
| PD7067       | BCR     | cna | gain    | BASIS    |
| PD7215       | BCR     | cna | gain    | BASIS    |
| PD8621       | BCR     | cna | gain    | BASIS    |
| PD9004       | BCR     | cna | gain    | BASIS    |
| PD9702       | BCR     | cna | gain    | BASIS    |
| TCGA-AN-A0XU | COL11A1 | cna | hetloss | TCGA     |

|              |         |     |         |          |
|--------------|---------|-----|---------|----------|
| TCGA-BH-A0AW | COL11A1 | cna | gain    | TCGA     |
| TCGA-BH-A0C0 | COL11A1 | cna | hetloss | TCGA     |
| TCGA-BH-A1FU | COL11A1 | cna | gain    | TCGA     |
| TCGA-E2-A1L7 | COL11A1 | cna | gain    | TCGA     |
| TCGA-LL-A5YP | COL11A1 | cna | hetloss | TCGA     |
| MB-0346      | COL11A1 | cna | hetloss | METABRIC |
| MB-2827      | COL11A1 | cna | hetloss | METABRIC |
| MB-7038      | COL11A1 | cna | gain    | METABRIC |
| PD11327      | COL11A1 | cna | gain    | BASIS    |
| PD11742      | COL11A1 | cna | hetloss | BASIS    |
| PD13296      | COL11A1 | cna | hetloss | BASIS    |
| PD13299      | COL11A1 | cna | gain    | BASIS    |
| PD22355      | COL11A1 | cna | hetloss | BASIS    |
| PD23574      | COL11A1 | cna | gain    | BASIS    |
| PD24186      | COL11A1 | cna | gain    | BASIS    |
| PD24202      | COL11A1 | cna | gain    | BASIS    |
| PD24206      | COL11A1 | cna | gain    | BASIS    |
| PD3890       | COL11A1 | cna | hetloss | BASIS    |
| PD3905       | COL11A1 | cna | amp     | BASIS    |
| PD4005       | COL11A1 | cna | hetloss | BASIS    |
| PD4006       | COL11A1 | cna | hetloss | BASIS    |
| PD4107       | COL11A1 | cna | gain    | BASIS    |
| PD5930       | COL11A1 | cna | gain    | BASIS    |
| PD5945       | COL11A1 | cna | gain    | BASIS    |
| PD5948       | COL11A1 | cna | gain    | BASIS    |
| PD6413       | COL11A1 | cna | hetloss | BASIS    |
| PD7067       | COL11A1 | cna | gain    | BASIS    |
| PD7215       | COL11A1 | cna | gain    | BASIS    |
| PD8621       | COL11A1 | cna | gain    | BASIS    |
| PD9585       | COL11A1 | cna | hetloss | BASIS    |
| PD9702       | COL11A1 | cna | gain    | BASIS    |
| TCGA-AN-A0XU | CREB1   | cna | gain    | TCGA     |
| TCGA-AO-A0JL | CREB1   | cna | gain    | TCGA     |
| TCGA-BH-A0AW | CREB1   | cna | hetloss | TCGA     |
| TCGA-C8-A12L | CREB1   | cna | gain    | TCGA     |
| TCGA-D8-A27M | CREB1   | cna | gain    | TCGA     |
| TCGA-E9-A1NC | CREB1   | cna | hetloss | TCGA     |
| MB-2827      | CREB1   | cna | hetloss | METABRIC |
| MB-6098      | CREB1   | cna | hetloss | METABRIC |
| MB-6271      | CREB1   | cna | hetloss | METABRIC |
| MB-7032      | CREB1   | cna | gain    | METABRIC |
| MB-0420      | CREB1   | cna | gain    | METABRIC |
| PD10014      | CREB1   | cna | gain    | BASIS    |
| PD11327      | CREB1   | cna | hetloss | BASIS    |
| PD13297      | CREB1   | cna | hetloss | BASIS    |
| PD23578      | CREB1   | cna | hetloss | BASIS    |
| PD24186      | CREB1   | cna | gain    | BASIS    |

|              |        |     |         |          |
|--------------|--------|-----|---------|----------|
| PD24206      | CREB1  | cna | gain    | BASIS    |
| PD3890       | CREB1  | cna | hetloss | BASIS    |
| PD3905       | CREB1  | cna | gain    | BASIS    |
| PD4006       | CREB1  | cna | gain    | BASIS    |
| PD4107       | CREB1  | cna | gain    | BASIS    |
| PD4967       | CREB1  | cna | hetloss | BASIS    |
| PD5935       | CREB1  | cna | gain    | BASIS    |
| PD5945       | CREB1  | cna | gain    | BASIS    |
| PD5948       | CREB1  | cna | gain    | BASIS    |
| PD6413       | CREB1  | cna | hetloss | BASIS    |
| PD6731       | CREB1  | cna | hetloss | BASIS    |
| PD7067       | CREB1  | cna | gain    | BASIS    |
| PD7215       | CREB1  | cna | gain    | BASIS    |
| PD9004       | CREB1  | cna | gain    | BASIS    |
| PD9585       | CREB1  | cna | hetloss | BASIS    |
| PD9702       | CREB1  | cna | gain    | BASIS    |
| TCGA-A2-A25B | DNMT3A | cna | hetloss | TCGA     |
| TCGA-AN-A0XU | DNMT3A | cna | gain    | TCGA     |
| TCGA-BH-A0AW | DNMT3A | cna | gain    | TCGA     |
| TCGA-BH-A0C0 | DNMT3A | cna | gain    | TCGA     |
| TCGA-C8-A12L | DNMT3A | cna | gain    | TCGA     |
| TCGA-D8-A27M | DNMT3A | cna | hetloss | TCGA     |
| TCGA-LL-A5YP | DNMT3A | cna | gain    | TCGA     |
| MB-0346      | DNMT3A | cna | gain    | METABRIC |
| MB-2827      | DNMT3A | cna | hetloss | METABRIC |
| MB-5465      | DNMT3A | cna | amp     | METABRIC |
| MB-6271      | DNMT3A | cna | hetloss | METABRIC |
| MB-7038      | DNMT3A | cna | gain    | METABRIC |
| PD10014      | DNMT3A | cna | gain    | BASIS    |
| PD11327      | DNMT3A | cna | gain    | BASIS    |
| PD13299      | DNMT3A | cna | gain    | BASIS    |
| PD22355      | DNMT3A | cna | gain    | BASIS    |
| PD23562      | DNMT3A | cna | gain    | BASIS    |
| PD23578      | DNMT3A | cna | gain    | BASIS    |
| PD24186      | DNMT3A | cna | gain    | BASIS    |
| PD3890       | DNMT3A | cna | hetloss | BASIS    |
| PD3905       | DNMT3A | cna | gain    | BASIS    |
| PD4006       | DNMT3A | cna | gain    | BASIS    |
| PD4826       | DNMT3A | cna | hetloss | BASIS    |
| PD5930       | DNMT3A | cna | gain    | BASIS    |
| PD5935       | DNMT3A | cna | gain    | BASIS    |
| PD5945       | DNMT3A | cna | gain    | BASIS    |
| PD5948       | DNMT3A | cna | gain    | BASIS    |
| PD6406       | DNMT3A | cna | hetloss | BASIS    |
| PD7067       | DNMT3A | cna | gain    | BASIS    |
| PD9004       | DNMT3A | cna | gain    | BASIS    |
| PD9585       | DNMT3A | cna | hetloss | BASIS    |

|              |        |     |         |          |
|--------------|--------|-----|---------|----------|
| PD9702       | DNMT3A | cna | gain    | BASIS    |
| TCGA-AN-A0XU | EPHA4  | cna | hetloss | TCGA     |
| TCGA-AO-A0JL | EPHA4  | cna | gain    | TCGA     |
| TCGA-BH-A0AW | EPHA4  | cna | hetloss | TCGA     |
| TCGA-C8-A12L | EPHA4  | cna | hetloss | TCGA     |
| TCGA-D8-A27M | EPHA4  | cna | gain    | TCGA     |
| TCGA-E2-A1L7 | EPHA4  | cna | hetloss | TCGA     |
| TCGA-E9-A1NC | EPHA4  | cna | hetloss | TCGA     |
| MB-2827      | EPHA4  | cna | hetloss | METABRIC |
| MB-6060      | EPHA4  | cna | hetloss | METABRIC |
| MB-6098      | EPHA4  | cna | hetloss | METABRIC |
| MB-6271      | EPHA4  | cna | hetloss | METABRIC |
| MB-7038      | EPHA4  | cna | gain    | METABRIC |
| PD10014      | EPHA4  | cna | gain    | BASIS    |
| PD11327      | EPHA4  | cna | gain    | BASIS    |
| PD13296      | EPHA4  | cna | hetloss | BASIS    |
| PD13297      | EPHA4  | cna | hetloss | BASIS    |
| PD23578      | EPHA4  | cna | hetloss | BASIS    |
| PD24186      | EPHA4  | cna | gain    | BASIS    |
| PD24337      | EPHA4  | cna | hetloss | BASIS    |
| PD3890       | EPHA4  | cna | hetloss | BASIS    |
| PD3905       | EPHA4  | cna | gain    | BASIS    |
| PD4107       | EPHA4  | cna | gain    | BASIS    |
| PD4967       | EPHA4  | cna | hetloss | BASIS    |
| PD5935       | EPHA4  | cna | gain    | BASIS    |
| PD5945       | EPHA4  | cna | gain    | BASIS    |
| PD5948       | EPHA4  | cna | gain    | BASIS    |
| PD6413       | EPHA4  | cna | hetloss | BASIS    |
| PD6731       | EPHA4  | cna | hetloss | BASIS    |
| PD7067       | EPHA4  | cna | gain    | BASIS    |
| PD7215       | EPHA4  | cna | gain    | BASIS    |
| PD8980       | EPHA4  | cna | hetloss | BASIS    |
| PD9585       | EPHA4  | cna | hetloss | BASIS    |
| TCGA-AO-A0JL | EPHA6  | cna | gain    | TCGA     |
| TCGA-BH-A0C0 | EPHA6  | cna | hetloss | TCGA     |
| TCGA-BH-A18R | EPHA6  | cna | gain    | TCGA     |
| TCGA-BH-A1FU | EPHA6  | cna | hetloss | TCGA     |
| TCGA-C8-A12L | EPHA6  | cna | gain    | TCGA     |
| TCGA-E2-A1L7 | EPHA6  | cna | hetloss | TCGA     |
| TCGA-LL-A5YP | EPHA6  | cna | gain    | TCGA     |
| MB-0346      | EPHA6  | cna | hetloss | METABRIC |
| MTS-T0064    | EPHA6  | cna | gain    | METABRIC |
| PD11327      | EPHA6  | cna | gain    | BASIS    |
| PD13296      | EPHA6  | cna | hetloss | BASIS    |
| PD13299      | EPHA6  | cna | gain    | BASIS    |
| PD23561      | EPHA6  | cna | hetloss | BASIS    |
| PD23562      | EPHA6  | cna | gain    | BASIS    |

|              |       |     |         |          |
|--------------|-------|-----|---------|----------|
| PD23574      | EPHA6 | cna | gain    | BASIS    |
| PD24186      | EPHA6 | cna | gain    | BASIS    |
| PD24206      | EPHA6 | cna | gain    | BASIS    |
| PD3905       | EPHA6 | cna | gain    | BASIS    |
| PD4005       | EPHA6 | cna | hetloss | BASIS    |
| PD4006       | EPHA6 | cna | hetloss | BASIS    |
| PD4107       | EPHA6 | cna | gain    | BASIS    |
| PD4826       | EPHA6 | cna | gain    | BASIS    |
| PD5930       | EPHA6 | cna | hetloss | BASIS    |
| PD5935       | EPHA6 | cna | gain    | BASIS    |
| PD5945       | EPHA6 | cna | amp     | BASIS    |
| PD5948       | EPHA6 | cna | gain    | BASIS    |
| PD7067       | EPHA6 | cna | gain    | BASIS    |
| PD7215       | EPHA6 | cna | gain    | BASIS    |
| PD8621       | EPHA6 | cna | gain    | BASIS    |
| PD8980       | EPHA6 | cna | gain    | BASIS    |
| PD9004       | EPHA6 | cna | gain    | BASIS    |
| PD9702       | EPHA6 | cna | gain    | BASIS    |
| TCGA-AO-A0JL | ERBB4 | cna | gain    | TCGA     |
| TCGA-BH-A0AW | ERBB4 | cna | hetloss | TCGA     |
| TCGA-C8-A12L | ERBB4 | cna | gain    | TCGA     |
| TCGA-D8-A27M | ERBB4 | cna | amp     | TCGA     |
| TCGA-E2-A1L7 | ERBB4 | cna | hetloss | TCGA     |
| TCGA-E9-A1NC | ERBB4 | cna | hetloss | TCGA     |
| MB-2827      | ERBB4 | cna | hetloss | METABRIC |
| MB-5465      | ERBB4 | cna | gain    | METABRIC |
| MB-6098      | ERBB4 | cna | hetloss | METABRIC |
| MB-6271      | ERBB4 | cna | hetloss | METABRIC |
| MB-7032      | ERBB4 | cna | gain    | METABRIC |
| PD10014      | ERBB4 | cna | gain    | BASIS    |
| PD11327      | ERBB4 | cna | gain    | BASIS    |
| PD13296      | ERBB4 | cna | hetloss | BASIS    |
| PD13297      | ERBB4 | cna | hetloss | BASIS    |
| PD23578      | ERBB4 | cna | hetloss | BASIS    |
| PD24186      | ERBB4 | cna | gain    | BASIS    |
| PD24206      | ERBB4 | cna | gain    | BASIS    |
| PD3890       | ERBB4 | cna | homdel  | BASIS    |
| PD3905       | ERBB4 | cna | gain    | BASIS    |
| PD4006       | ERBB4 | cna | hetloss | BASIS    |
| PD4107       | ERBB4 | cna | gain    | BASIS    |
| PD4967       | ERBB4 | cna | hetloss | BASIS    |
| PD5935       | ERBB4 | cna | gain    | BASIS    |
| PD5945       | ERBB4 | cna | gain    | BASIS    |
| PD5948       | ERBB4 | cna | gain    | BASIS    |
| PD6413       | ERBB4 | cna | hetloss | BASIS    |
| PD6731       | ERBB4 | cna | hetloss | BASIS    |
| PD7067       | ERBB4 | cna | gain    | BASIS    |



|              |       |     |         |          |
|--------------|-------|-----|---------|----------|
| PD7215       | ERBB4 | cna | gain    | BASIS    |
| PD9585       | ERBB4 | cna | hetloss | BASIS    |
| PD9702       | ERBB4 | cna | gain    | BASIS    |
| TCGA-AN-A0XU | EXT2  | cna | hetloss | TCGA     |
| TCGA-AO-A0JL | EXT2  | cna | hetloss | TCGA     |
| TCGA-BH-A0C0 | EXT2  | cna | hetloss | TCGA     |
| TCGA-C8-A12L | EXT2  | cna | hetloss | TCGA     |
| TCGA-LL-A5YP | EXT2  | cna | gain    | TCGA     |
| MB-0346      | EXT2  | cna | hetloss | METABRIC |
| MB-6060      | EXT2  | cna | gain    | METABRIC |
| MB-6098      | EXT2  | cna | hetloss | METABRIC |
| MB-6271      | EXT2  | cna | gain    | METABRIC |
| MB-7048      | EXT2  | cna | hetloss | METABRIC |
| PD10014      | EXT2  | cna | hetloss | BASIS    |
| PD13296      | EXT2  | cna | gain    | BASIS    |
| PD23574      | EXT2  | cna | gain    | BASIS    |
| PD24186      | EXT2  | cna | gain    | BASIS    |
| PD24202      | EXT2  | cna | amp     | BASIS    |
| PD24206      | EXT2  | cna | gain    | BASIS    |
| PD3905       | EXT2  | cna | gain    | BASIS    |
| PD4005       | EXT2  | cna | gain    | BASIS    |
| PD4006       | EXT2  | cna | gain    | BASIS    |
| PD4107       | EXT2  | cna | gain    | BASIS    |
| PD4826       | EXT2  | cna | gain    | BASIS    |
| PD5930       | EXT2  | cna | gain    | BASIS    |
| PD5935       | EXT2  | cna | gain    | BASIS    |
| PD5945       | EXT2  | cna | gain    | BASIS    |
| PD5948       | EXT2  | cna | gain    | BASIS    |
| PD6413       | EXT2  | cna | hetloss | BASIS    |
| PD6731       | EXT2  | cna | hetloss | BASIS    |
| PD7215       | EXT2  | cna | amp     | BASIS    |
| PD8621       | EXT2  | cna | gain    | BASIS    |
| PD8980       | EXT2  | cna | hetloss | BASIS    |
| PD9585       | EXT2  | cna | hetloss | BASIS    |
| PD9702       | EXT2  | cna | gain    | BASIS    |
| TCGA-A2-A25B | FANCG | cna | hetloss | TCGA     |
| TCGA-AN-A0XU | FANCG | cna | hetloss | TCGA     |
| TCGA-AO-A0JL | FANCG | cna | gain    | TCGA     |
| TCGA-BH-A0AW | FANCG | cna | hetloss | TCGA     |
| TCGA-BH-A1FU | FANCG | cna | hetloss | TCGA     |
| TCGA-C8-A12L | FANCG | cna | hetloss | TCGA     |
| TCGA-LL-A5YP | FANCG | cna | hetloss | TCGA     |
| MB-0346      | FANCG | cna | hetloss | METABRIC |
| MB-0420      | FANCG | cna | hetloss | METABRIC |
| PD11327      | FANCG | cna | hetloss | BASIS    |
| PD13297      | FANCG | cna | hetloss | BASIS    |
| PD13299      | FANCG | cna | amp     | BASIS    |

|              |       |     |         |          |
|--------------|-------|-----|---------|----------|
| PD22355      | FANCG | cna | gain    | BASIS    |
| PD23562      | FANCG | cna | gain    | BASIS    |
| PD23574      | FANCG | cna | amp     | BASIS    |
| PD24202      | FANCG | cna | hetloss | BASIS    |
| PD24337      | FANCG | cna | hetloss | BASIS    |
| PD3905       | FANCG | cna | gain    | BASIS    |
| PD4006       | FANCG | cna | gain    | BASIS    |
| PD4107       | FANCG | cna | gain    | BASIS    |
| PD4826       | FANCG | cna | gain    | BASIS    |
| PD4967       | FANCG | cna | hetloss | BASIS    |
| PD5930       | FANCG | cna | gain    | BASIS    |
| PD5935       | FANCG | cna | gain    | BASIS    |
| PD5945       | FANCG | cna | amp     | BASIS    |
| PD7067       | FANCG | cna | gain    | BASIS    |
| PD7215       | FANCG | cna | hetloss | BASIS    |
| PD8621       | FANCG | cna | gain    | BASIS    |
| PD8980       | FANCG | cna | hetloss | BASIS    |
| PD9004       | FANCG | cna | gain    | BASIS    |
| PD9585       | FANCG | cna | hetloss | BASIS    |
| PD9702       | FANCG | cna | gain    | BASIS    |
| TCGA-A2-A25B | FGFR4 | cna | hetloss | TCGA     |
| TCGA-AN-A0XU | FGFR4 | cna | hetloss | TCGA     |
| TCGA-AO-A0JL | FGFR4 | cna | hetloss | TCGA     |
| TCGA-BH-A0C0 | FGFR4 | cna | hetloss | TCGA     |
| TCGA-BH-A1FU | FGFR4 | cna | hetloss | TCGA     |
| TCGA-C8-A12L | FGFR4 | cna | hetloss | TCGA     |
| TCGA-D8-A27M | FGFR4 | cna | hetloss | TCGA     |
| TCGA-E2-A1L7 | FGFR4 | cna | hetloss | TCGA     |
| MB-5070      | FGFR4 | cna | hetloss | METABRIC |
| MB-6098      | FGFR4 | cna | hetloss | METABRIC |
| MB-7038      | FGFR4 | cna | gain    | METABRIC |
| PD10014      | FGFR4 | cna | hetloss | BASIS    |
| PD13296      | FGFR4 | cna | hetloss | BASIS    |
| PD13297      | FGFR4 | cna | hetloss | BASIS    |
| PD13771      | FGFR4 | cna | gain    | BASIS    |
| PD22355      | FGFR4 | cna | hetloss | BASIS    |
| PD23578      | FGFR4 | cna | hetloss | BASIS    |
| PD24186      | FGFR4 | cna | gain    | BASIS    |
| PD24206      | FGFR4 | cna | gain    | BASIS    |
| PD3905       | FGFR4 | cna | gain    | BASIS    |
| PD4005       | FGFR4 | cna | hetloss | BASIS    |
| PD4006       | FGFR4 | cna | gain    | BASIS    |
| PD4107       | FGFR4 | cna | hetloss | BASIS    |
| PD4826       | FGFR4 | cna | gain    | BASIS    |
| PD5945       | FGFR4 | cna | gain    | BASIS    |
| PD5948       | FGFR4 | cna | hetloss | BASIS    |
| PD6406       | FGFR4 | cna | hetloss | BASIS    |

|              |       |     |         |          |
|--------------|-------|-----|---------|----------|
| PD6413       | FGFR4 | cna | hetloss | BASIS    |
| PD7067       | FGFR4 | cna | gain    | BASIS    |
| PD7215       | FGFR4 | cna | amp     | BASIS    |
| PD8980       | FGFR4 | cna | gain    | BASIS    |
| PD9702       | FGFR4 | cna | gain    | BASIS    |
| TCGA-BH-A0C0 | GSK3B | cna | hetloss | TCGA     |
| TCGA-BH-A18R | GSK3B | cna | gain    | TCGA     |
| TCGA-BH-A1FU | GSK3B | cna | hetloss | TCGA     |
| TCGA-C8-A12L | GSK3B | cna | hetloss | TCGA     |
| TCGA-E2-A1L7 | GSK3B | cna | hetloss | TCGA     |
| TCGA-LL-A5YP | GSK3B | cna | gain    | TCGA     |
| MB-0346      | GSK3B | cna | hetloss | METABRIC |
| MB-5070      | GSK3B | cna | hetloss | METABRIC |
| MB-5107      | GSK3B | cna | gain    | METABRIC |
| MB-5465      | GSK3B | cna | gain    | METABRIC |
| MB-6098      | GSK3B | cna | hetloss | METABRIC |
| MTS-T0064    | GSK3B | cna | hetloss | METABRIC |
| PD13296      | GSK3B | cna | hetloss | BASIS    |
| PD13299      | GSK3B | cna | gain    | BASIS    |
| PD23561      | GSK3B | cna | hetloss | BASIS    |
| PD23574      | GSK3B | cna | gain    | BASIS    |
| PD24186      | GSK3B | cna | gain    | BASIS    |
| PD24206      | GSK3B | cna | gain    | BASIS    |
| PD3905       | GSK3B | cna | gain    | BASIS    |
| PD4005       | GSK3B | cna | hetloss | BASIS    |
| PD4107       | GSK3B | cna | gain    | BASIS    |
| PD4826       | GSK3B | cna | gain    | BASIS    |
| PD5935       | GSK3B | cna | gain    | BASIS    |
| PD5945       | GSK3B | cna | gain    | BASIS    |
| PD5948       | GSK3B | cna | gain    | BASIS    |
| PD6731       | GSK3B | cna | gain    | BASIS    |
| PD7067       | GSK3B | cna | gain    | BASIS    |
| PD7215       | GSK3B | cna | gain    | BASIS    |
| PD8621       | GSK3B | cna | gain    | BASIS    |
| PD8980       | GSK3B | cna | gain    | BASIS    |
| PD9004       | GSK3B | cna | gain    | BASIS    |
| PD9702       | GSK3B | cna | gain    | BASIS    |
| TCGA-A2-A25B | HMGA2 | cna | gain    | TCGA     |
| TCGA-AO-A0JL | HMGA2 | cna | hetloss | TCGA     |
| TCGA-BH-A18R | HMGA2 | cna | gain    | TCGA     |
| TCGA-BH-A1FU | HMGA2 | cna | hetloss | TCGA     |
| TCGA-C8-A12L | HMGA2 | cna | gain    | TCGA     |
| TCGA-E2-A1L7 | HMGA2 | cna | hetloss | TCGA     |
| TCGA-LL-A5YP | HMGA2 | cna | hetloss | TCGA     |
| MB-0346      | HMGA2 | cna | gain    | METABRIC |
| MB-2827      | HMGA2 | cna | hetloss | METABRIC |
| MB-5107      | HMGA2 | cna | gain    | METABRIC |

|              |           |     |         |          |
|--------------|-----------|-----|---------|----------|
| MB-5465      | HMGA2     | cna | gain    | METABRIC |
| MB-6098      | HMGA2     | cna | gain    | METABRIC |
| MB-0420      | HMGA2     | cna | hetloss | METABRIC |
| MTS-T0064    | HMGA2     | cna | gain    | METABRIC |
| PD10014      | HMGA2     | cna | gain    | BASIS    |
| PD22355      | HMGA2     | cna | hetloss | BASIS    |
| PD23578      | HMGA2     | cna | gain    | BASIS    |
| PD24186      | HMGA2     | cna | gain    | BASIS    |
| PD24202      | HMGA2     | cna | hetloss | BASIS    |
| PD24206      | HMGA2     | cna | gain    | BASIS    |
| PD3890       | HMGA2     | cna | hetloss | BASIS    |
| PD3905       | HMGA2     | cna | gain    | BASIS    |
| PD4107       | HMGA2     | cna | gain    | BASIS    |
| PD4826       | HMGA2     | cna | gain    | BASIS    |
| PD5945       | HMGA2     | cna | gain    | BASIS    |
| PD6406       | HMGA2     | cna | hetloss | BASIS    |
| PD6413       | HMGA2     | cna | hetloss | BASIS    |
| PD6731       | HMGA2     | cna | hetloss | BASIS    |
| PD7067       | HMGA2     | cna | gain    | BASIS    |
| PD8621       | HMGA2     | cna | hetloss | BASIS    |
| PD9585       | HMGA2     | cna | hetloss | BASIS    |
| PD9702       | HMGA2     | cna | gain    | BASIS    |
| TCGA-A2-A25B | HNRNPA2B1 | cna | gain    | TCGA     |
| TCGA-BH-A0AW | HNRNPA2B1 | cna | gain    | TCGA     |
| TCGA-BH-A0C0 | HNRNPA2B1 | cna | hetloss | TCGA     |
| TCGA-C8-A12L | HNRNPA2B1 | cna | gain    | TCGA     |
| TCGA-D8-A27M | HNRNPA2B1 | cna | hetloss | TCGA     |
| TCGA-LL-A5YP | HNRNPA2B1 | cna | hetloss | TCGA     |
| MB-0346      | HNRNPA2B1 | cna | gain    | METABRIC |
| MB-6098      | HNRNPA2B1 | cna | hetloss | METABRIC |
| MB-0420      | HNRNPA2B1 | cna | hetloss | METABRIC |
| PD10014      | HNRNPA2B1 | cna | hetloss | BASIS    |
| PD11327      | HNRNPA2B1 | cna | gain    | BASIS    |
| PD13296      | HNRNPA2B1 | cna | gain    | BASIS    |
| PD13297      | HNRNPA2B1 | cna | hetloss | BASIS    |
| PD22355      | HNRNPA2B1 | cna | hetloss | BASIS    |
| PD23574      | HNRNPA2B1 | cna | gain    | BASIS    |
| PD23578      | HNRNPA2B1 | cna | hetloss | BASIS    |
| PD24186      | HNRNPA2B1 | cna | gain    | BASIS    |
| PD24206      | HNRNPA2B1 | cna | gain    | BASIS    |
| PD24337      | HNRNPA2B1 | cna | hetloss | BASIS    |
| PD3905       | HNRNPA2B1 | cna | gain    | BASIS    |
| PD4005       | HNRNPA2B1 | cna | hetloss | BASIS    |
| PD4006       | HNRNPA2B1 | cna | gain    | BASIS    |
| PD4107       | HNRNPA2B1 | cna | amp     | BASIS    |
| PD4826       | HNRNPA2B1 | cna | gain    | BASIS    |
| PD5935       | HNRNPA2B1 | cna | gain    | BASIS    |

|              |           |     |         |          |
|--------------|-----------|-----|---------|----------|
| PD5945       | HNRNPA2B1 | cna | amp     | BASIS    |
| PD6406       | HNRNPA2B1 | cna | hetloss | BASIS    |
| PD6413       | HNRNPA2B1 | cna | gain    | BASIS    |
| PD7215       | HNRNPA2B1 | cna | gain    | BASIS    |
| PD8621       | HNRNPA2B1 | cna | gain    | BASIS    |
| PD9585       | HNRNPA2B1 | cna | gain    | BASIS    |
| PD9702       | HNRNPA2B1 | cna | gain    | BASIS    |
| TCGA-A2-A25B | IGFBP7    | cna | hetloss | TCGA     |
| TCGA-AO-A0JL | IGFBP7    | cna | gain    | TCGA     |
| TCGA-BH-A0C0 | IGFBP7    | cna | gain    | TCGA     |
| TCGA-BH-A1FU | IGFBP7    | cna | gain    | TCGA     |
| TCGA-C8-A12L | IGFBP7    | cna | amp     | TCGA     |
| TCGA-D8-A27M | IGFBP7    | cna | gain    | TCGA     |
| TCGA-E9-A1NC | IGFBP7    | cna | hetloss | TCGA     |
| TCGA-LL-A5YP | IGFBP7    | cna | gain    | TCGA     |
| MB-5465      | IGFBP7    | cna | gain    | METABRIC |
| MB-6060      | IGFBP7    | cna | gain    | METABRIC |
| MB-6098      | IGFBP7    | cna | amp     | METABRIC |
| MB-7038      | IGFBP7    | cna | gain    | METABRIC |
| MB-0420      | IGFBP7    | cna | hetloss | METABRIC |
| PD11742      | IGFBP7    | cna | hetloss | BASIS    |
| PD13296      | IGFBP7    | cna | hetloss | BASIS    |
| PD13297      | IGFBP7    | cna | hetloss | BASIS    |
| PD22355      | IGFBP7    | cna | hetloss | BASIS    |
| PD23562      | IGFBP7    | cna | gain    | BASIS    |
| PD23574      | IGFBP7    | cna | gain    | BASIS    |
| PD24202      | IGFBP7    | cna | hetloss | BASIS    |
| PD24206      | IGFBP7    | cna | gain    | BASIS    |
| PD3890       | IGFBP7    | cna | gain    | BASIS    |
| PD3905       | IGFBP7    | cna | gain    | BASIS    |
| PD4006       | IGFBP7    | cna | hetloss | BASIS    |
| PD4107       | IGFBP7    | cna | gain    | BASIS    |
| PD4826       | IGFBP7    | cna | gain    | BASIS    |
| PD5945       | IGFBP7    | cna | gain    | BASIS    |
| PD5948       | IGFBP7    | cna | gain    | BASIS    |
| PD6413       | IGFBP7    | cna | gain    | BASIS    |
| PD7215       | IGFBP7    | cna | amp     | BASIS    |
| PD8980       | IGFBP7    | cna | hetloss | BASIS    |
| PD9702       | IGFBP7    | cna | gain    | BASIS    |
| TCGA-AO-A0JL | INSR      | cna | gain    | TCGA     |
| TCGA-BH-A0C0 | INSR      | cna | gain    | TCGA     |
| TCGA-BH-A1FU | INSR      | cna | hetloss | TCGA     |
| TCGA-C8-A12L | INSR      | cna | hetloss | TCGA     |
| TCGA-D8-A27M | INSR      | cna | hetloss | TCGA     |
| TCGA-EW-A10X | INSR      | cna | hetloss | TCGA     |
| TCGA-LL-A5YP | INSR      | cna | hetloss | TCGA     |
| MB-0346      | INSR      | cna | gain    | METABRIC |

|              |      |     |         |          |
|--------------|------|-----|---------|----------|
| MB-2827      | INSR | cna | hetloss | METABRIC |
| MB-5465      | INSR | cna | gain    | METABRIC |
| MB-6098      | INSR | cna | hetloss | METABRIC |
| MB-7038      | INSR | cna | hetloss | METABRIC |
| MB-0420      | INSR | cna | hetloss | METABRIC |
| PD10014      | INSR | cna | hetloss | BASIS    |
| PD11327      | INSR | cna | homdel  | BASIS    |
| PD14442      | INSR | cna | hetloss | BASIS    |
| PD23574      | INSR | cna | gain    | BASIS    |
| PD24202      | INSR | cna | gain    | BASIS    |
| PD24206      | INSR | cna | homdel  | BASIS    |
| PD3905       | INSR | cna | gain    | BASIS    |
| PD4006       | INSR | cna | gain    | BASIS    |
| PD4107       | INSR | cna | gain    | BASIS    |
| PD4826       | INSR | cna | gain    | BASIS    |
| PD4967       | INSR | cna | homdel  | BASIS    |
| PD5930       | INSR | cna | gain    | BASIS    |
| PD5945       | INSR | cna | amp     | BASIS    |
| PD5948       | INSR | cna | gain    | BASIS    |
| PD7067       | INSR | cna | gain    | BASIS    |
| PD7215       | INSR | cna | amp     | BASIS    |
| PD8621       | INSR | cna | gain    | BASIS    |
| PD8980       | INSR | cna | gain    | BASIS    |
| PD9702       | INSR | cna | gain    | BASIS    |
| TCGA-A2-A25B | KDR  | cna | hetloss | TCGA     |
| TCGA-AO-A0JL | KDR  | cna | gain    | TCGA     |
| TCGA-BH-A0C0 | KDR  | cna | gain    | TCGA     |
| TCGA-BH-A1FU | KDR  | cna | gain    | TCGA     |
| TCGA-C8-A12L | KDR  | cna | gain    | TCGA     |
| TCGA-D8-A27M | KDR  | cna | gain    | TCGA     |
| TCGA-E9-A1NC | KDR  | cna | hetloss | TCGA     |
| TCGA-LL-A5YP | KDR  | cna | gain    | TCGA     |
| MB-5070      | KDR  | cna | hetloss | METABRIC |
| MB-5465      | KDR  | cna | gain    | METABRIC |
| MB-6060      | KDR  | cna | gain    | METABRIC |
| MB-6098      | KDR  | cna | amp     | METABRIC |
| MB-7038      | KDR  | cna | gain    | METABRIC |
| MB-0420      | KDR  | cna | hetloss | METABRIC |
| PD11327      | KDR  | cna | amp     | BASIS    |
| PD11742      | KDR  | cna | hetloss | BASIS    |
| PD13296      | KDR  | cna | hetloss | BASIS    |
| PD13297      | KDR  | cna | hetloss | BASIS    |
| PD22355      | KDR  | cna | hetloss | BASIS    |
| PD23574      | KDR  | cna | gain    | BASIS    |
| PD24206      | KDR  | cna | gain    | BASIS    |
| PD3890       | KDR  | cna | gain    | BASIS    |
| PD3905       | KDR  | cna | gain    | BASIS    |

|              |        |     |         |          |
|--------------|--------|-----|---------|----------|
| PD4006       | KDR    | cna | gain    | BASIS    |
| PD4107       | KDR    | cna | gain    | BASIS    |
| PD4826       | KDR    | cna | gain    | BASIS    |
| PD5935       | KDR    | cna | gain    | BASIS    |
| PD5945       | KDR    | cna | gain    | BASIS    |
| PD5948       | KDR    | cna | gain    | BASIS    |
| PD7215       | KDR    | cna | amp     | BASIS    |
| PD8980       | KDR    | cna | hetloss | BASIS    |
| PD9702       | KDR    | cna | gain    | BASIS    |
| TCGA-A2-A25B | LRIG3  | cna | gain    | TCGA     |
| TCGA-AO-A0JL | LRIG3  | cna | hetloss | TCGA     |
| TCGA-BH-A18R | LRIG3  | cna | gain    | TCGA     |
| TCGA-BH-A1FU | LRIG3  | cna | hetloss | TCGA     |
| TCGA-C8-A12L | LRIG3  | cna | gain    | TCGA     |
| TCGA-E2-A1L7 | LRIG3  | cna | hetloss | TCGA     |
| TCGA-LL-A5YP | LRIG3  | cna | hetloss | TCGA     |
| MB-0346      | LRIG3  | cna | gain    | METABRIC |
| MB-2827      | LRIG3  | cna | hetloss | METABRIC |
| MB-5107      | LRIG3  | cna | gain    | METABRIC |
| MB-6060      | LRIG3  | cna | gain    | METABRIC |
| MB-6098      | LRIG3  | cna | gain    | METABRIC |
| MB-0420      | LRIG3  | cna | hetloss | METABRIC |
| PD13296      | LRIG3  | cna | hetloss | BASIS    |
| PD13297      | LRIG3  | cna | hetloss | BASIS    |
| PD22355      | LRIG3  | cna | hetloss | BASIS    |
| PD23578      | LRIG3  | cna | gain    | BASIS    |
| PD24186      | LRIG3  | cna | gain    | BASIS    |
| PD24202      | LRIG3  | cna | hetloss | BASIS    |
| PD24206      | LRIG3  | cna | amp     | BASIS    |
| PD3890       | LRIG3  | cna | hetloss | BASIS    |
| PD3905       | LRIG3  | cna | gain    | BASIS    |
| PD4006       | LRIG3  | cna | hetloss | BASIS    |
| PD4107       | LRIG3  | cna | hetloss | BASIS    |
| PD4826       | LRIG3  | cna | gain    | BASIS    |
| PD5945       | LRIG3  | cna | gain    | BASIS    |
| PD6413       | LRIG3  | cna | hetloss | BASIS    |
| PD6731       | LRIG3  | cna | hetloss | BASIS    |
| PD7067       | LRIG3  | cna | gain    | BASIS    |
| PD8621       | LRIG3  | cna | hetloss | BASIS    |
| PD9585       | LRIG3  | cna | hetloss | BASIS    |
| PD9702       | LRIG3  | cna | gain    | BASIS    |
| TCGA-A2-A25B | MAP3K7 | cna | hetloss | TCGA     |
| TCGA-AN-A0XU | MAP3K7 | cna | amp     | TCGA     |
| TCGA-AO-A0JL | MAP3K7 | cna | hetloss | TCGA     |
| TCGA-C8-A12L | MAP3K7 | cna | gain    | TCGA     |
| MB-2827      | MAP3K7 | cna | amp     | METABRIC |
| MB-5107      | MAP3K7 | cna | hetloss | METABRIC |

|                   |        |     |         |            |
|-------------------|--------|-----|---------|------------|
| MB-6060           | MAP3K7 | cna | hetloss | METABRIC   |
| MB-6098           | MAP3K7 | cna | hetloss | METABRIC   |
| MB-7032           | MAP3K7 | cna | hetloss | METABRIC   |
| MB-7038           | MAP3K7 | cna | gain    | METABRIC   |
| MB-7048           | MAP3K7 | cna | hetloss | METABRIC   |
| PD11327           | MAP3K7 | cna | gain    | BASIS      |
| PD13299           | MAP3K7 | cna | gain    | BASIS      |
| PD13771           | MAP3K7 | cna | hetloss | BASIS      |
| PD23562           | MAP3K7 | cna | gain    | BASIS      |
| PD23574           | MAP3K7 | cna | gain    | BASIS      |
| PD24186           | MAP3K7 | cna | gain    | BASIS      |
| PD24206           | MAP3K7 | cna | gain    | BASIS      |
| PD24337           | MAP3K7 | cna | hetloss | BASIS      |
| PD3905            | MAP3K7 | cna | gain    | BASIS      |
| PD4006            | MAP3K7 | cna | gain    | BASIS      |
| PD4107            | MAP3K7 | cna | hetloss | BASIS      |
| PD4826            | MAP3K7 | cna | gain    | BASIS      |
| PD5935            | MAP3K7 | cna | gain    | BASIS      |
| PD5945            | MAP3K7 | cna | gain    | BASIS      |
| PD6731            | MAP3K7 | cna | hetloss | BASIS      |
| PD7215            | MAP3K7 | cna | gain    | BASIS      |
| PD8621            | MAP3K7 | cna | gain    | BASIS      |
| PD8980            | MAP3K7 | cna | gain    | BASIS      |
| PD9004            | MAP3K7 | cna | gain    | BASIS      |
| PD9585            | MAP3K7 | cna | hetloss | BASIS      |
| PD9702            | MAP3K7 | cna | gain    | BASIS      |
| TCGA-AN-A0XU      | MYD88  | cna | hetloss | TCGA       |
| TCGA-BH-A0C0      | MYD88  | cna | hetloss | TCGA       |
| TCGA-BH-A1FU      | MYD88  | cna | hetloss | TCGA       |
| TCGA-C8-A12L      | MYD88  | cna | hetloss | TCGA       |
| TCGA-D8-A27M      | MYD88  | cna | hetloss | TCGA       |
| TCGA-E9-A1NC      | MYD88  | cna | hetloss | TCGA       |
| TCGA-LL-A5YP      | MYD88  | cna | amp     | TCGA       |
| MB-2827           | MYD88  | cna | hetloss | METABRIC   |
| MB-7038           | MYD88  | cna | hetloss | METABRIC   |
| MB-7048           | MYD88  | cna | hetloss | METABRIC   |
| MB-0420           | MYD88  | cna | hetloss | METABRIC   |
| P-0009557-T01-IM5 | MYD88  | cna | homdel  | MSK-IMPACT |
| PD10014           | MYD88  | cna | hetloss | BASIS      |
| PD11742           | MYD88  | cna | gain    | BASIS      |
| PD13296           | MYD88  | cna | gain    | BASIS      |
| PD13299           | MYD88  | cna | gain    | BASIS      |
| PD13771           | MYD88  | cna | gain    | BASIS      |
| PD22355           | MYD88  | cna | hetloss | BASIS      |
| PD23561           | MYD88  | cna | hetloss | BASIS      |
| PD23574           | MYD88  | cna | gain    | BASIS      |
| PD23578           | MYD88  | cna | hetloss | BASIS      |



|              |        |     |         |          |
|--------------|--------|-----|---------|----------|
| PD24202      | MYD88  | cna | hetloss | BASIS    |
| PD24206      | MYD88  | cna | gain    | BASIS    |
| PD3890       | MYD88  | cna | hetloss | BASIS    |
| PD3905       | MYD88  | cna | gain    | BASIS    |
| PD4826       | MYD88  | cna | gain    | BASIS    |
| PD5945       | MYD88  | cna | gain    | BASIS    |
| PD6406       | MYD88  | cna | hetloss | BASIS    |
| PD6731       | MYD88  | cna | hetloss | BASIS    |
| PD7067       | MYD88  | cna | gain    | BASIS    |
| PD8980       | MYD88  | cna | gain    | BASIS    |
| PD9585       | MYD88  | cna | hetloss | BASIS    |
| TCGA-A2-A25B | NCOA1  | cna | hetloss | TCGA     |
| TCGA-AN-A0XU | NCOA1  | cna | gain    | TCGA     |
| TCGA-BH-A0AW | NCOA1  | cna | gain    | TCGA     |
| TCGA-BH-A0C0 | NCOA1  | cna | gain    | TCGA     |
| TCGA-C8-A12L | NCOA1  | cna | gain    | TCGA     |
| TCGA-D8-A27M | NCOA1  | cna | hetloss | TCGA     |
| TCGA-LL-A5YP | NCOA1  | cna | gain    | TCGA     |
| MB-0346      | NCOA1  | cna | gain    | METABRIC |
| MB-2827      | NCOA1  | cna | hetloss | METABRIC |
| MB-5070      | NCOA1  | cna | gain    | METABRIC |
| MB-5465      | NCOA1  | cna | amp     | METABRIC |
| MB-6271      | NCOA1  | cna | hetloss | METABRIC |
| MB-7038      | NCOA1  | cna | gain    | METABRIC |
| PD10014      | NCOA1  | cna | gain    | BASIS    |
| PD11327      | NCOA1  | cna | gain    | BASIS    |
| PD13299      | NCOA1  | cna | gain    | BASIS    |
| PD22355      | NCOA1  | cna | gain    | BASIS    |
| PD23578      | NCOA1  | cna | gain    | BASIS    |
| PD24186      | NCOA1  | cna | gain    | BASIS    |
| PD3890       | NCOA1  | cna | hetloss | BASIS    |
| PD3905       | NCOA1  | cna | gain    | BASIS    |
| PD4006       | NCOA1  | cna | gain    | BASIS    |
| PD4826       | NCOA1  | cna | hetloss | BASIS    |
| PD5930       | NCOA1  | cna | gain    | BASIS    |
| PD5935       | NCOA1  | cna | gain    | BASIS    |
| PD5945       | NCOA1  | cna | gain    | BASIS    |
| PD5948       | NCOA1  | cna | amp     | BASIS    |
| PD6406       | NCOA1  | cna | hetloss | BASIS    |
| PD7067       | NCOA1  | cna | gain    | BASIS    |
| PD9004       | NCOA1  | cna | gain    | BASIS    |
| PD9585       | NCOA1  | cna | hetloss | BASIS    |
| PD9702       | NCOA1  | cna | gain    | BASIS    |
| TCGA-AO-A0JL | NFE2L2 | cna | gain    | TCGA     |
| TCGA-BH-A0AW | NFE2L2 | cna | gain    | TCGA     |
| TCGA-D8-A27M | NFE2L2 | cna | gain    | TCGA     |
| TCGA-LL-A5YP | NFE2L2 | cna | gain    | TCGA     |

|              |        |     |         |          |
|--------------|--------|-----|---------|----------|
| MB-2827      | NFE2L2 | cna | hetloss | METABRIC |
| MB-5070      | NFE2L2 | cna | hetloss | METABRIC |
| MB-5107      | NFE2L2 | cna | hetloss | METABRIC |
| MB-6098      | NFE2L2 | cna | hetloss | METABRIC |
| MB-6271      | NFE2L2 | cna | hetloss | METABRIC |
| MB-7032      | NFE2L2 | cna | gain    | METABRIC |
| MB-0420      | NFE2L2 | cna | gain    | METABRIC |
| PD10014      | NFE2L2 | cna | gain    | BASIS    |
| PD11327      | NFE2L2 | cna | gain    | BASIS    |
| PD13299      | NFE2L2 | cna | gain    | BASIS    |
| PD22355      | NFE2L2 | cna | hetloss | BASIS    |
| PD24186      | NFE2L2 | cna | gain    | BASIS    |
| PD24202      | NFE2L2 | cna | gain    | BASIS    |
| PD24206      | NFE2L2 | cna | gain    | BASIS    |
| PD3890       | NFE2L2 | cna | hetloss | BASIS    |
| PD3905       | NFE2L2 | cna | gain    | BASIS    |
| PD4006       | NFE2L2 | cna | gain    | BASIS    |
| PD4107       | NFE2L2 | cna | gain    | BASIS    |
| PD4967       | NFE2L2 | cna | hetloss | BASIS    |
| PD5935       | NFE2L2 | cna | gain    | BASIS    |
| PD5945       | NFE2L2 | cna | amp     | BASIS    |
| PD5948       | NFE2L2 | cna | gain    | BASIS    |
| PD6413       | NFE2L2 | cna | hetloss | BASIS    |
| PD7067       | NFE2L2 | cna | gain    | BASIS    |
| PD7215       | NFE2L2 | cna | gain    | BASIS    |
| PD9004       | NFE2L2 | cna | gain    | BASIS    |
| PD9585       | NFE2L2 | cna | hetloss | BASIS    |
| PD9702       | NFE2L2 | cna | gain    | BASIS    |
| TCGA-AN-A0XU | NOTCH2 | cna | gain    | TCGA     |
| TCGA-AO-A0JL | NOTCH2 | cna | gain    | TCGA     |
| TCGA-BH-A0AW | NOTCH2 | cna | gain    | TCGA     |
| TCGA-BH-A0C0 | NOTCH2 | cna | hetloss | TCGA     |
| TCGA-BH-A18R | NOTCH2 | cna | gain    | TCGA     |
| TCGA-BH-A1FU | NOTCH2 | cna | gain    | TCGA     |
| TCGA-C8-A12L | NOTCH2 | cna | amp     | TCGA     |
| TCGA-E2-A1L7 | NOTCH2 | cna | gain    | TCGA     |
| TCGA-EW-A10X | NOTCH2 | cna | gain    | TCGA     |
| TCGA-LL-A5YP | NOTCH2 | cna | amp     | TCGA     |
| MB-0346      | NOTCH2 | cna | hetloss | METABRIC |
| MB-2827      | NOTCH2 | cna | hetloss | METABRIC |
| MB-7032      | NOTCH2 | cna | gain    | METABRIC |
| MB-7038      | NOTCH2 | cna | gain    | METABRIC |
| PD11327      | NOTCH2 | cna | gain    | BASIS    |
| PD13296      | NOTCH2 | cna | gain    | BASIS    |
| PD13299      | NOTCH2 | cna | gain    | BASIS    |
| PD22355      | NOTCH2 | cna | hetloss | BASIS    |
| PD23574      | NOTCH2 | cna | gain    | BASIS    |

|              |        |     |         |          |
|--------------|--------|-----|---------|----------|
| PD24186      | NOTCH2 | cna | gain    | BASIS    |
| PD24206      | NOTCH2 | cna | gain    | BASIS    |
| PD3905       | NOTCH2 | cna | gain    | BASIS    |
| PD4006       | NOTCH2 | cna | gain    | BASIS    |
| PD4107       | NOTCH2 | cna | gain    | BASIS    |
| PD5930       | NOTCH2 | cna | gain    | BASIS    |
| PD5945       | NOTCH2 | cna | amp     | BASIS    |
| PD5948       | NOTCH2 | cna | gain    | BASIS    |
| PD6406       | NOTCH2 | cna | hetloss | BASIS    |
| PD7067       | NOTCH2 | cna | amp     | BASIS    |
| PD7215       | NOTCH2 | cna | gain    | BASIS    |
| PD8621       | NOTCH2 | cna | gain    | BASIS    |
| PD9702       | NOTCH2 | cna | gain    | BASIS    |
| TCGA-AN-A0XU | NOTCH4 | cna | gain    | TCGA     |
| TCGA-AO-A0JL | NOTCH4 | cna | gain    | TCGA     |
| TCGA-BH-A0AW | NOTCH4 | cna | gain    | TCGA     |
| TCGA-BH-A0C0 | NOTCH4 | cna | hetloss | TCGA     |
| TCGA-BH-A18R | NOTCH4 | cna | gain    | TCGA     |
| TCGA-C8-A12L | NOTCH4 | cna | hetloss | TCGA     |
| TCGA-E2-A1L7 | NOTCH4 | cna | hetloss | TCGA     |
| TCGA-E9-A1NC | NOTCH4 | cna | amp     | TCGA     |
| MB-6098      | NOTCH4 | cna | hetloss | METABRIC |
| MB-7032      | NOTCH4 | cna | gain    | METABRIC |
| PD10014      | NOTCH4 | cna | hetloss | BASIS    |
| PD11327      | NOTCH4 | cna | hetloss | BASIS    |
| PD13296      | NOTCH4 | cna | gain    | BASIS    |
| PD13299      | NOTCH4 | cna | gain    | BASIS    |
| PD23562      | NOTCH4 | cna | gain    | BASIS    |
| PD23578      | NOTCH4 | cna | gain    | BASIS    |
| PD24186      | NOTCH4 | cna | gain    | BASIS    |
| PD24206      | NOTCH4 | cna | gain    | BASIS    |
| PD3905       | NOTCH4 | cna | gain    | BASIS    |
| PD4006       | NOTCH4 | cna | gain    | BASIS    |
| PD4107       | NOTCH4 | cna | gain    | BASIS    |
| PD4826       | NOTCH4 | cna | gain    | BASIS    |
| PD5935       | NOTCH4 | cna | gain    | BASIS    |
| PD5945       | NOTCH4 | cna | amp     | BASIS    |
| PD5948       | NOTCH4 | cna | gain    | BASIS    |
| PD6731       | NOTCH4 | cna | hetloss | BASIS    |
| PD7067       | NOTCH4 | cna | amp     | BASIS    |
| PD7215       | NOTCH4 | cna | gain    | BASIS    |
| PD8621       | NOTCH4 | cna | amp     | BASIS    |
| PD9004       | NOTCH4 | cna | gain    | BASIS    |
| PD9585       | NOTCH4 | cna | gain    | BASIS    |
| PD9702       | NOTCH4 | cna | amp     | BASIS    |
| TCGA-AN-A0XU | NR4A2  | cna | hetloss | TCGA     |
| TCGA-AO-A0JL | NR4A2  | cna | gain    | TCGA     |

|              |       |     |         |          |
|--------------|-------|-----|---------|----------|
| TCGA-LL-A5YP | NR4A2 | cna | gain    | TCGA     |
| MB-2827      | NR4A2 | cna | hetloss | METABRIC |
| MB-5107      | NR4A2 | cna | hetloss | METABRIC |
| MB-6098      | NR4A2 | cna | hetloss | METABRIC |
| MB-6271      | NR4A2 | cna | hetloss | METABRIC |
| MB-7032      | NR4A2 | cna | gain    | METABRIC |
| PD11327      | NR4A2 | cna | gain    | BASIS    |
| PD13297      | NR4A2 | cna | gain    | BASIS    |
| PD13299      | NR4A2 | cna | gain    | BASIS    |
| PD22355      | NR4A2 | cna | hetloss | BASIS    |
| PD23574      | NR4A2 | cna | gain    | BASIS    |
| PD23578      | NR4A2 | cna | hetloss | BASIS    |
| PD24186      | NR4A2 | cna | gain    | BASIS    |
| PD24202      | NR4A2 | cna | hetloss | BASIS    |
| PD24206      | NR4A2 | cna | gain    | BASIS    |
| PD3890       | NR4A2 | cna | hetloss | BASIS    |
| PD3905       | NR4A2 | cna | gain    | BASIS    |
| PD4005       | NR4A2 | cna | hetloss | BASIS    |
| PD4006       | NR4A2 | cna | hetloss | BASIS    |
| PD4107       | NR4A2 | cna | gain    | BASIS    |
| PD4967       | NR4A2 | cna | hetloss | BASIS    |
| PD5930       | NR4A2 | cna | hetloss | BASIS    |
| PD5935       | NR4A2 | cna | gain    | BASIS    |
| PD5948       | NR4A2 | cna | gain    | BASIS    |
| PD6406       | NR4A2 | cna | hetloss | BASIS    |
| PD6413       | NR4A2 | cna | hetloss | BASIS    |
| PD7067       | NR4A2 | cna | gain    | BASIS    |
| PD7215       | NR4A2 | cna | gain    | BASIS    |
| PD8621       | NR4A2 | cna | hetloss | BASIS    |
| PD9702       | NR4A2 | cna | gain    | BASIS    |
| TCGA-A2-A25B | NSD1  | cna | hetloss | TCGA     |
| TCGA-AN-A0XU | NSD1  | cna | hetloss | TCGA     |
| TCGA-AO-A0JL | NSD1  | cna | hetloss | TCGA     |
| TCGA-BH-A0C0 | NSD1  | cna | hetloss | TCGA     |
| TCGA-BH-A1FU | NSD1  | cna | hetloss | TCGA     |
| TCGA-C8-A12L | NSD1  | cna | hetloss | TCGA     |
| TCGA-D8-A27M | NSD1  | cna | hetloss | TCGA     |
| TCGA-E2-A1L7 | NSD1  | cna | hetloss | TCGA     |
| MB-5070      | NSD1  | cna | hetloss | METABRIC |
| MB-6098      | NSD1  | cna | hetloss | METABRIC |
| MB-7038      | NSD1  | cna | gain    | METABRIC |
| PD10014      | NSD1  | cna | hetloss | BASIS    |
| PD13296      | NSD1  | cna | hetloss | BASIS    |
| PD13297      | NSD1  | cna | hetloss | BASIS    |
| PD13771      | NSD1  | cna | gain    | BASIS    |
| PD22355      | NSD1  | cna | hetloss | BASIS    |
| PD23578      | NSD1  | cna | hetloss | BASIS    |

|              |       |     |         |          |
|--------------|-------|-----|---------|----------|
| PD24186      | NSD1  | cna | gain    | BASIS    |
| PD24206      | NSD1  | cna | gain    | BASIS    |
| PD3905       | NSD1  | cna | gain    | BASIS    |
| PD4005       | NSD1  | cna | hetloss | BASIS    |
| PD4006       | NSD1  | cna | gain    | BASIS    |
| PD4107       | NSD1  | cna | hetloss | BASIS    |
| PD4826       | NSD1  | cna | gain    | BASIS    |
| PD5945       | NSD1  | cna | gain    | BASIS    |
| PD5948       | NSD1  | cna | hetloss | BASIS    |
| PD6406       | NSD1  | cna | hetloss | BASIS    |
| PD6413       | NSD1  | cna | hetloss | BASIS    |
| PD7067       | NSD1  | cna | gain    | BASIS    |
| PD7215       | NSD1  | cna | amp     | BASIS    |
| PD8980       | NSD1  | cna | gain    | BASIS    |
| PD9702       | NSD1  | cna | gain    | BASIS    |
| TCGA-A2-A25B | PATZ1 | cna | hetloss | TCGA     |
| TCGA-BH-A0C0 | PATZ1 | cna | gain    | TCGA     |
| TCGA-BH-A1FU | PATZ1 | cna | gain    | TCGA     |
| TCGA-C8-A12L | PATZ1 | cna | gain    | TCGA     |
| TCGA-D8-A27M | PATZ1 | cna | gain    | TCGA     |
| TCGA-E9-A1NC | PATZ1 | cna | gain    | TCGA     |
| TCGA-LL-A5YP | PATZ1 | cna | gain    | TCGA     |
| MB-0346      | PATZ1 | cna | gain    | METABRIC |
| MB-6098      | PATZ1 | cna | gain    | METABRIC |
| PD11327      | PATZ1 | cna | gain    | BASIS    |
| PD13296      | PATZ1 | cna | gain    | BASIS    |
| PD13297      | PATZ1 | cna | gain    | BASIS    |
| PD13299      | PATZ1 | cna | gain    | BASIS    |
| PD14442      | PATZ1 | cna | hetloss | BASIS    |
| PD23562      | PATZ1 | cna | gain    | BASIS    |
| PD23574      | PATZ1 | cna | gain    | BASIS    |
| PD24206      | PATZ1 | cna | homdel  | BASIS    |
| PD3905       | PATZ1 | cna | gain    | BASIS    |
| PD4006       | PATZ1 | cna | gain    | BASIS    |
| PD4107       | PATZ1 | cna | gain    | BASIS    |
| PD4826       | PATZ1 | cna | gain    | BASIS    |
| PD4967       | PATZ1 | cna | hetloss | BASIS    |
| PD5930       | PATZ1 | cna | gain    | BASIS    |
| PD5935       | PATZ1 | cna | gain    | BASIS    |
| PD5945       | PATZ1 | cna | amp     | BASIS    |
| PD5948       | PATZ1 | cna | gain    | BASIS    |
| PD6731       | PATZ1 | cna | hetloss | BASIS    |
| PD7067       | PATZ1 | cna | gain    | BASIS    |
| PD7215       | PATZ1 | cna | gain    | BASIS    |
| PD8621       | PATZ1 | cna | gain    | BASIS    |
| PD9004       | PATZ1 | cna | gain    | BASIS    |
| PD9702       | PATZ1 | cna | gain    | BASIS    |

|              |        |     |         |          |
|--------------|--------|-----|---------|----------|
| TCGA-A2-A25B | PAX5   | cna | hetloss | TCGA     |
| TCGA-AN-A0XU | PAX5   | cna | hetloss | TCGA     |
| TCGA-AO-A0JL | PAX5   | cna | hetloss | TCGA     |
| TCGA-BH-A0AW | PAX5   | cna | hetloss | TCGA     |
| TCGA-BH-A1FU | PAX5   | cna | hetloss | TCGA     |
| TCGA-C8-A12L | PAX5   | cna | hetloss | TCGA     |
| TCGA-E9-A1NC | PAX5   | cna | gain    | TCGA     |
| TCGA-LL-A5YP | PAX5   | cna | hetloss | TCGA     |
| MB-0346      | PAX5   | cna | hetloss | METABRIC |
| MB-6098      | PAX5   | cna | hetloss | METABRIC |
| MB-0420      | PAX5   | cna | hetloss | METABRIC |
| MTS-T0064    | PAX5   | cna | amp     | METABRIC |
| PD11327      | PAX5   | cna | hetloss | BASIS    |
| PD13297      | PAX5   | cna | hetloss | BASIS    |
| PD13299      | PAX5   | cna | gain    | BASIS    |
| PD23562      | PAX5   | cna | gain    | BASIS    |
| PD23574      | PAX5   | cna | amp     | BASIS    |
| PD3890       | PAX5   | cna | hetloss | BASIS    |
| PD3905       | PAX5   | cna | gain    | BASIS    |
| PD4006       | PAX5   | cna | gain    | BASIS    |
| PD4107       | PAX5   | cna | gain    | BASIS    |
| PD4826       | PAX5   | cna | gain    | BASIS    |
| PD4967       | PAX5   | cna | hetloss | BASIS    |
| PD5930       | PAX5   | cna | gain    | BASIS    |
| PD5945       | PAX5   | cna | amp     | BASIS    |
| PD7067       | PAX5   | cna | gain    | BASIS    |
| PD7215       | PAX5   | cna | hetloss | BASIS    |
| PD8621       | PAX5   | cna | gain    | BASIS    |
| PD8980       | PAX5   | cna | hetloss | BASIS    |
| PD9004       | PAX5   | cna | gain    | BASIS    |
| PD9585       | PAX5   | cna | hetloss | BASIS    |
| PD9702       | PAX5   | cna | gain    | BASIS    |
| TCGA-A2-A25B | PHLDA1 | cna | gain    | TCGA     |
| TCGA-AN-A0XU | PHLDA1 | cna | hetloss | TCGA     |
| TCGA-AO-A0JL | PHLDA1 | cna | hetloss | TCGA     |
| TCGA-BH-A18R | PHLDA1 | cna | gain    | TCGA     |
| TCGA-BH-A1FU | PHLDA1 | cna | hetloss | TCGA     |
| TCGA-C8-A12L | PHLDA1 | cna | gain    | TCGA     |
| TCGA-E2-A1L7 | PHLDA1 | cna | hetloss | TCGA     |
| MB-0346      | PHLDA1 | cna | gain    | METABRIC |
| MB-2827      | PHLDA1 | cna | hetloss | METABRIC |
| MB-5070      | PHLDA1 | cna | hetloss | METABRIC |
| MB-5107      | PHLDA1 | cna | gain    | METABRIC |
| MB-5465      | PHLDA1 | cna | gain    | METABRIC |
| MB-6098      | PHLDA1 | cna | hetloss | METABRIC |
| MTS-T0064    | PHLDA1 | cna | gain    | METABRIC |
| PD11327      | PHLDA1 | cna | homdel  | BASIS    |

|              |        |     |         |          |
|--------------|--------|-----|---------|----------|
| PD13296      | PHLDA1 | cna | hetloss | BASIS    |
| PD22355      | PHLDA1 | cna | hetloss | BASIS    |
| PD23578      | PHLDA1 | cna | gain    | BASIS    |
| PD24202      | PHLDA1 | cna | hetloss | BASIS    |
| PD24206      | PHLDA1 | cna | gain    | BASIS    |
| PD24337      | PHLDA1 | cna | gain    | BASIS    |
| PD3890       | PHLDA1 | cna | hetloss | BASIS    |
| PD3905       | PHLDA1 | cna | gain    | BASIS    |
| PD4826       | PHLDA1 | cna | gain    | BASIS    |
| PD5945       | PHLDA1 | cna | gain    | BASIS    |
| PD6406       | PHLDA1 | cna | hetloss | BASIS    |
| PD6413       | PHLDA1 | cna | hetloss | BASIS    |
| PD6731       | PHLDA1 | cna | hetloss | BASIS    |
| PD7067       | PHLDA1 | cna | gain    | BASIS    |
| PD8621       | PHLDA1 | cna | hetloss | BASIS    |
| PD8980       | PHLDA1 | cna | hetloss | BASIS    |
| PD9585       | PHLDA1 | cna | hetloss | BASIS    |
| TCGA-A2-A25B | PMS2   | cna | gain    | TCGA     |
| TCGA-BH-A0AW | PMS2   | cna | gain    | TCGA     |
| TCGA-BH-A0C0 | PMS2   | cna | hetloss | TCGA     |
| TCGA-C8-A12L | PMS2   | cna | gain    | TCGA     |
| TCGA-E2-A1L7 | PMS2   | cna | hetloss | TCGA     |
| TCGA-LL-A5YP | PMS2   | cna | homdel  | TCGA     |
| MB-5465      | PMS2   | cna | gain    | METABRIC |
| MB-6098      | PMS2   | cna | hetloss | METABRIC |
| MB-7038      | PMS2   | cna | hetloss | METABRIC |
| MB-7048      | PMS2   | cna | hetloss | METABRIC |
| MB-0420      | PMS2   | cna | hetloss | METABRIC |
| PD11327      | PMS2   | cna | homdel  | BASIS    |
| PD13771      | PMS2   | cna | gain    | BASIS    |
| PD22355      | PMS2   | cna | hetloss | BASIS    |
| PD23574      | PMS2   | cna | gain    | BASIS    |
| PD23578      | PMS2   | cna | hetloss | BASIS    |
| PD24202      | PMS2   | cna | gain    | BASIS    |
| PD24206      | PMS2   | cna | gain    | BASIS    |
| PD24337      | PMS2   | cna | hetloss | BASIS    |
| PD3905       | PMS2   | cna | gain    | BASIS    |
| PD4006       | PMS2   | cna | gain    | BASIS    |
| PD4107       | PMS2   | cna | gain    | BASIS    |
| PD4826       | PMS2   | cna | gain    | BASIS    |
| PD5935       | PMS2   | cna | gain    | BASIS    |
| PD5945       | PMS2   | cna | gain    | BASIS    |
| PD6406       | PMS2   | cna | hetloss | BASIS    |
| PD7067       | PMS2   | cna | gain    | BASIS    |
| PD7215       | PMS2   | cna | gain    | BASIS    |
| PD8621       | PMS2   | cna | gain    | BASIS    |
| PD8980       | PMS2   | cna | hetloss | BASIS    |

|              |       |     |         |          |
|--------------|-------|-----|---------|----------|
| PD9004       | PMS2  | cna | gain    | BASIS    |
| PD9702       | PMS2  | cna | gain    | BASIS    |
| TCGA-AN-A0XU | RBM15 | cna | hetloss | TCGA     |
| TCGA-BH-A0AW | RBM15 | cna | gain    | TCGA     |
| TCGA-BH-A0C0 | RBM15 | cna | hetloss | TCGA     |
| TCGA-BH-A1FU | RBM15 | cna | gain    | TCGA     |
| TCGA-E2-A1L7 | RBM15 | cna | gain    | TCGA     |
| TCGA-LL-A5YP | RBM15 | cna | hetloss | TCGA     |
| MB-0346      | RBM15 | cna | hetloss | METABRIC |
| MB-2827      | RBM15 | cna | hetloss | METABRIC |
| MB-7032      | RBM15 | cna | gain    | METABRIC |
| MB-7038      | RBM15 | cna | gain    | METABRIC |
| PD11327      | RBM15 | cna | gain    | BASIS    |
| PD11742      | RBM15 | cna | hetloss | BASIS    |
| PD13296      | RBM15 | cna | hetloss | BASIS    |
| PD13299      | RBM15 | cna | gain    | BASIS    |
| PD22355      | RBM15 | cna | hetloss | BASIS    |
| PD23574      | RBM15 | cna | gain    | BASIS    |
| PD24186      | RBM15 | cna | gain    | BASIS    |
| PD24202      | RBM15 | cna | gain    | BASIS    |
| PD24206      | RBM15 | cna | gain    | BASIS    |
| PD3890       | RBM15 | cna | hetloss | BASIS    |
| PD3905       | RBM15 | cna | gain    | BASIS    |
| PD4006       | RBM15 | cna | gain    | BASIS    |
| PD4107       | RBM15 | cna | gain    | BASIS    |
| PD5930       | RBM15 | cna | gain    | BASIS    |
| PD5945       | RBM15 | cna | gain    | BASIS    |
| PD5948       | RBM15 | cna | gain    | BASIS    |
| PD6413       | RBM15 | cna | hetloss | BASIS    |
| PD7067       | RBM15 | cna | gain    | BASIS    |
| PD7215       | RBM15 | cna | gain    | BASIS    |
| PD8621       | RBM15 | cna | gain    | BASIS    |
| PD9585       | RBM15 | cna | hetloss | BASIS    |
| PD9702       | RBM15 | cna | gain    | BASIS    |
| TCGA-A2-A25B | RMRP  | cna | hetloss | TCGA     |
| TCGA-AN-A0XU | RMRP  | cna | hetloss | TCGA     |
| TCGA-AO-A0JL | RMRP  | cna | gain    | TCGA     |
| TCGA-BH-A0AW | RMRP  | cna | hetloss | TCGA     |
| TCGA-BH-A1FU | RMRP  | cna | hetloss | TCGA     |
| TCGA-C8-A12L | RMRP  | cna | hetloss | TCGA     |
| TCGA-E9-A1NC | RMRP  | cna | gain    | TCGA     |
| TCGA-LL-A5YP | RMRP  | cna | hetloss | TCGA     |
| MB-0346      | RMRP  | cna | hetloss | METABRIC |
| MB-0420      | RMRP  | cna | hetloss | METABRIC |
| PD11327      | RMRP  | cna | hetloss | BASIS    |
| PD13297      | RMRP  | cna | hetloss | BASIS    |
| PD13299      | RMRP  | cna | amp     | BASIS    |



|              |       |     |         |          |
|--------------|-------|-----|---------|----------|
| PD23562      | RMRP  | cna | gain    | BASIS    |
| PD23574      | RMRP  | cna | amp     | BASIS    |
| PD24202      | RMRP  | cna | hetloss | BASIS    |
| PD24337      | RMRP  | cna | gain    | BASIS    |
| PD3905       | RMRP  | cna | gain    | BASIS    |
| PD4006       | RMRP  | cna | gain    | BASIS    |
| PD4107       | RMRP  | cna | gain    | BASIS    |
| PD4826       | RMRP  | cna | gain    | BASIS    |
| PD4967       | RMRP  | cna | hetloss | BASIS    |
| PD5930       | RMRP  | cna | gain    | BASIS    |
| PD5935       | RMRP  | cna | gain    | BASIS    |
| PD5945       | RMRP  | cna | amp     | BASIS    |
| PD7067       | RMRP  | cna | gain    | BASIS    |
| PD7215       | RMRP  | cna | hetloss | BASIS    |
| PD8621       | RMRP  | cna | gain    | BASIS    |
| PD8980       | RMRP  | cna | hetloss | BASIS    |
| PD9004       | RMRP  | cna | gain    | BASIS    |
| PD9585       | RMRP  | cna | hetloss | BASIS    |
| PD9702       | RMRP  | cna | gain    | BASIS    |
| TCGA-A2-A25B | RUNX1 | cna | hetloss | TCGA     |
| TCGA-BH-A0C0 | RUNX1 | cna | hetloss | TCGA     |
| TCGA-BH-A1FU | RUNX1 | cna | gain    | TCGA     |
| TCGA-C8-A12L | RUNX1 | cna | homdel  | TCGA     |
| TCGA-D8-A27M | RUNX1 | cna | hetloss | TCGA     |
| TCGA-LL-A5YP | RUNX1 | cna | gain    | TCGA     |
| MB-0346      | RUNX1 | cna | gain    | METABRIC |
| MB-2827      | RUNX1 | cna | amp     | METABRIC |
| MB-5070      | RUNX1 | cna | gain    | METABRIC |
| MB-6098      | RUNX1 | cna | gain    | METABRIC |
| MB-7048      | RUNX1 | cna | hetloss | METABRIC |
| PD13296      | RUNX1 | cna | gain    | BASIS    |
| PD13297      | RUNX1 | cna | hetloss | BASIS    |
| PD13771      | RUNX1 | cna | gain    | BASIS    |
| PD23562      | RUNX1 | cna | gain    | BASIS    |
| PD23578      | RUNX1 | cna | gain    | BASIS    |
| PD24186      | RUNX1 | cna | gain    | BASIS    |
| PD24202      | RUNX1 | cna | gain    | BASIS    |
| PD24206      | RUNX1 | cna | gain    | BASIS    |
| PD3905       | RUNX1 | cna | gain    | BASIS    |
| PD4107       | RUNX1 | cna | gain    | BASIS    |
| PD4826       | RUNX1 | cna | gain    | BASIS    |
| PD5930       | RUNX1 | cna | gain    | BASIS    |
| PD5945       | RUNX1 | cna | gain    | BASIS    |
| PD5948       | RUNX1 | cna | gain    | BASIS    |
| PD6731       | RUNX1 | cna | gain    | BASIS    |
| PD7067       | RUNX1 | cna | gain    | BASIS    |
| PD7215       | RUNX1 | cna | gain    | BASIS    |

|              |       |     |         |          |
|--------------|-------|-----|---------|----------|
| PD8621       | RUNX1 | cna | gain    | BASIS    |
| PD8980       | RUNX1 | cna | homdel  | BASIS    |
| PD9004       | RUNX1 | cna | amp     | BASIS    |
| PD9702       | RUNX1 | cna | amp     | BASIS    |
| TCGA-AN-A0XU | RYBP  | cna | hetloss | TCGA     |
| TCGA-BH-A0C0 | RYBP  | cna | hetloss | TCGA     |
| TCGA-BH-A18R | RYBP  | cna | homdel  | TCGA     |
| TCGA-BH-A1FU | RYBP  | cna | hetloss | TCGA     |
| TCGA-C8-A12L | RYBP  | cna | hetloss | TCGA     |
| TCGA-D8-A27M | RYBP  | cna | hetloss | TCGA     |
| TCGA-E2-A1L7 | RYBP  | cna | homdel  | TCGA     |
| TCGA-E9-A1NC | RYBP  | cna | hetloss | TCGA     |
| TCGA-LL-A5YP | RYBP  | cna | gain    | TCGA     |
| MB-0346      | RYBP  | cna | hetloss | METABRIC |
| MB-2827      | RYBP  | cna | hetloss | METABRIC |
| MB-5465      | RYBP  | cna | hetloss | METABRIC |
| MB-6098      | RYBP  | cna | hetloss | METABRIC |
| MB-7048      | RYBP  | cna | hetloss | METABRIC |
| MB-0420      | RYBP  | cna | hetloss | METABRIC |
| MTS-T0064    | RYBP  | cna | gain    | METABRIC |
| PD10014      | RYBP  | cna | hetloss | BASIS    |
| PD11742      | RYBP  | cna | hetloss | BASIS    |
| PD13296      | RYBP  | cna | hetloss | BASIS    |
| PD13299      | RYBP  | cna | gain    | BASIS    |
| PD13771      | RYBP  | cna | hetloss | BASIS    |
| PD23561      | RYBP  | cna | hetloss | BASIS    |
| PD23574      | RYBP  | cna | gain    | BASIS    |
| PD23578      | RYBP  | cna | hetloss | BASIS    |
| PD24202      | RYBP  | cna | hetloss | BASIS    |
| PD24337      | RYBP  | cna | hetloss | BASIS    |
| PD4107       | RYBP  | cna | gain    | BASIS    |
| PD5945       | RYBP  | cna | gain    | BASIS    |
| PD6406       | RYBP  | cna | hetloss | BASIS    |
| PD6731       | RYBP  | cna | hetloss | BASIS    |
| PD7067       | RYBP  | cna | gain    | BASIS    |
| PD9585       | RYBP  | cna | hetloss | BASIS    |
| TCGA-AN-A0XU | SF3B1 | cna | gain    | TCGA     |
| TCGA-AO-A0JL | SF3B1 | cna | gain    | TCGA     |
| TCGA-BH-A0AW | SF3B1 | cna | gain    | TCGA     |
| TCGA-C8-A12L | SF3B1 | cna | gain    | TCGA     |
| TCGA-D8-A27M | SF3B1 | cna | gain    | TCGA     |
| MB-2827      | SF3B1 | cna | hetloss | METABRIC |
| MB-6098      | SF3B1 | cna | hetloss | METABRIC |
| MB-6271      | SF3B1 | cna | hetloss | METABRIC |
| MB-7032      | SF3B1 | cna | gain    | METABRIC |
| MB-0420      | SF3B1 | cna | amp     | METABRIC |
| PD10014      | SF3B1 | cna | gain    | BASIS    |

|              |       |     |         |          |
|--------------|-------|-----|---------|----------|
| PD11327      | SF3B1 | cna | gain    | BASIS    |
| PD13296      | SF3B1 | cna | hetloss | BASIS    |
| PD13297      | SF3B1 | cna | hetloss | BASIS    |
| PD13299      | SF3B1 | cna | gain    | BASIS    |
| PD24186      | SF3B1 | cna | gain    | BASIS    |
| PD24206      | SF3B1 | cna | gain    | BASIS    |
| PD3890       | SF3B1 | cna | hetloss | BASIS    |
| PD3905       | SF3B1 | cna | gain    | BASIS    |
| PD4006       | SF3B1 | cna | gain    | BASIS    |
| PD4107       | SF3B1 | cna | gain    | BASIS    |
| PD4967       | SF3B1 | cna | hetloss | BASIS    |
| PD5935       | SF3B1 | cna | gain    | BASIS    |
| PD5945       | SF3B1 | cna | gain    | BASIS    |
| PD5948       | SF3B1 | cna | gain    | BASIS    |
| PD6413       | SF3B1 | cna | hetloss | BASIS    |
| PD7067       | SF3B1 | cna | gain    | BASIS    |
| PD7215       | SF3B1 | cna | amp     | BASIS    |
| PD8621       | SF3B1 | cna | gain    | BASIS    |
| PD9004       | SF3B1 | cna | gain    | BASIS    |
| PD9585       | SF3B1 | cna | hetloss | BASIS    |
| PD9702       | SF3B1 | cna | gain    | BASIS    |
| TCGA-AN-A0XU | SMAD3 | cna | hetloss | TCGA     |
| TCGA-AO-A0JL | SMAD3 | cna | hetloss | TCGA     |
| TCGA-BH-A0AW | SMAD3 | cna | hetloss | TCGA     |
| TCGA-BH-A0C0 | SMAD3 | cna | hetloss | TCGA     |
| TCGA-D8-A27M | SMAD3 | cna | hetloss | TCGA     |
| TCGA-E2-A1L7 | SMAD3 | cna | gain    | TCGA     |
| TCGA-LL-A5YP | SMAD3 | cna | gain    | TCGA     |
| MB-0346      | SMAD3 | cna | hetloss | METABRIC |
| MB-6060      | SMAD3 | cna | gain    | METABRIC |
| MB-7038      | SMAD3 | cna | gain    | METABRIC |
| MB-7048      | SMAD3 | cna | hetloss | METABRIC |
| PD11742      | SMAD3 | cna | hetloss | BASIS    |
| PD13296      | SMAD3 | cna | hetloss | BASIS    |
| PD13297      | SMAD3 | cna | hetloss | BASIS    |
| PD22355      | SMAD3 | cna | hetloss | BASIS    |
| PD23562      | SMAD3 | cna | gain    | BASIS    |
| PD23574      | SMAD3 | cna | gain    | BASIS    |
| PD23578      | SMAD3 | cna | gain    | BASIS    |
| PD24202      | SMAD3 | cna | hetloss | BASIS    |
| PD24206      | SMAD3 | cna | gain    | BASIS    |
| PD3890       | SMAD3 | cna | hetloss | BASIS    |
| PD3905       | SMAD3 | cna | gain    | BASIS    |
| PD4006       | SMAD3 | cna | gain    | BASIS    |
| PD5945       | SMAD3 | cna | gain    | BASIS    |
| PD5948       | SMAD3 | cna | gain    | BASIS    |
| PD6406       | SMAD3 | cna | hetloss | BASIS    |

|              |       |     |         |          |
|--------------|-------|-----|---------|----------|
| PD6413       | SMAD3 | cna | gain    | BASIS    |
| PD7067       | SMAD3 | cna | gain    | BASIS    |
| PD7215       | SMAD3 | cna | gain    | BASIS    |
| PD8980       | SMAD3 | cna | gain    | BASIS    |
| PD9585       | SMAD3 | cna | hetloss | BASIS    |
| PD9702       | SMAD3 | cna | gain    | BASIS    |
| TCGA-A2-A25B | SRC   | cna | gain    | TCGA     |
| TCGA-AO-A0JL | SRC   | cna | gain    | TCGA     |
| TCGA-BH-A0AW | SRC   | cna | gain    | TCGA     |
| TCGA-BH-A0C0 | SRC   | cna | gain    | TCGA     |
| TCGA-C8-A12L | SRC   | cna | gain    | TCGA     |
| TCGA-D8-A27M | SRC   | cna | gain    | TCGA     |
| TCGA-E2-A1L7 | SRC   | cna | gain    | TCGA     |
| TCGA-E9-A1NC | SRC   | cna | hetloss | TCGA     |
| TCGA-LL-A5YP | SRC   | cna | hetloss | TCGA     |
| MB-0346      | SRC   | cna | gain    | METABRIC |
| MB-5107      | SRC   | cna | gain    | METABRIC |
| MB-6098      | SRC   | cna | hetloss | METABRIC |
| PD13296      | SRC   | cna | hetloss | BASIS    |
| PD13297      | SRC   | cna | hetloss | BASIS    |
| PD13299      | SRC   | cna | gain    | BASIS    |
| PD13771      | SRC   | cna | gain    | BASIS    |
| PD23578      | SRC   | cna | hetloss | BASIS    |
| PD24186      | SRC   | cna | gain    | BASIS    |
| PD24202      | SRC   | cna | hetloss | BASIS    |
| PD3905       | SRC   | cna | gain    | BASIS    |
| PD4005       | SRC   | cna | hetloss | BASIS    |
| PD4107       | SRC   | cna | gain    | BASIS    |
| PD4826       | SRC   | cna | gain    | BASIS    |
| PD5935       | SRC   | cna | gain    | BASIS    |
| PD5945       | SRC   | cna | amp     | BASIS    |
| PD5948       | SRC   | cna | amp     | BASIS    |
| PD6731       | SRC   | cna | hetloss | BASIS    |
| PD7067       | SRC   | cna | gain    | BASIS    |
| PD7215       | SRC   | cna | gain    | BASIS    |
| PD8980       | SRC   | cna | gain    | BASIS    |
| PD9004       | SRC   | cna | gain    | BASIS    |
| PD9585       | SRC   | cna | hetloss | BASIS    |
| TCGA-A2-A25B | TAF1L | cna | hetloss | TCGA     |
| TCGA-AN-A0XU | TAF1L | cna | hetloss | TCGA     |
| TCGA-AO-A0JL | TAF1L | cna | gain    | TCGA     |
| TCGA-BH-A0AW | TAF1L | cna | hetloss | TCGA     |
| TCGA-BH-A1FU | TAF1L | cna | hetloss | TCGA     |
| TCGA-C8-A12L | TAF1L | cna | hetloss | TCGA     |
| TCGA-EW-A10X | TAF1L | cna | gain    | TCGA     |
| MB-0346      | TAF1L | cna | hetloss | METABRIC |
| MB-5070      | TAF1L | cna | hetloss | METABRIC |

|              |       |     |         |          |
|--------------|-------|-----|---------|----------|
| MB-0420      | TAF1L | cna | hetloss | METABRIC |
| PD13297      | TAF1L | cna | hetloss | BASIS    |
| PD13299      | TAF1L | cna | gain    | BASIS    |
| PD22355      | TAF1L | cna | gain    | BASIS    |
| PD23574      | TAF1L | cna | amp     | BASIS    |
| PD24202      | TAF1L | cna | hetloss | BASIS    |
| PD24337      | TAF1L | cna | hetloss | BASIS    |
| PD3905       | TAF1L | cna | gain    | BASIS    |
| PD4005       | TAF1L | cna | hetloss | BASIS    |
| PD4006       | TAF1L | cna | gain    | BASIS    |
| PD4826       | TAF1L | cna | gain    | BASIS    |
| PD4967       | TAF1L | cna | hetloss | BASIS    |
| PD5930       | TAF1L | cna | hetloss | BASIS    |
| PD5935       | TAF1L | cna | gain    | BASIS    |
| PD5945       | TAF1L | cna | amp     | BASIS    |
| PD6406       | TAF1L | cna | hetloss | BASIS    |
| PD7067       | TAF1L | cna | gain    | BASIS    |
| PD7215       | TAF1L | cna | hetloss | BASIS    |
| PD8621       | TAF1L | cna | gain    | BASIS    |
| PD8980       | TAF1L | cna | hetloss | BASIS    |
| PD9004       | TAF1L | cna | gain    | BASIS    |
| PD9585       | TAF1L | cna | hetloss | BASIS    |
| PD9702       | TAF1L | cna | gain    | BASIS    |
| TCGA-A2-A25B | TAL1  | cna | gain    | TCGA     |
| TCGA-AN-A0XU | TAL1  | cna | gain    | TCGA     |
| TCGA-AO-A0JL | TAL1  | cna | hetloss | TCGA     |
| TCGA-BH-A0AW | TAL1  | cna | gain    | TCGA     |
| TCGA-BH-A0C0 | TAL1  | cna | hetloss | TCGA     |
| TCGA-BH-A1FU | TAL1  | cna | gain    | TCGA     |
| TCGA-D8-A27M | TAL1  | cna | gain    | TCGA     |
| TCGA-E2-A1L7 | TAL1  | cna | gain    | TCGA     |
| TCGA-LL-A5YP | TAL1  | cna | hetloss | TCGA     |
| MB-0346      | TAL1  | cna | hetloss | METABRIC |
| MB-2827      | TAL1  | cna | hetloss | METABRIC |
| MB-6060      | TAL1  | cna | hetloss | METABRIC |
| MB-6098      | TAL1  | cna | gain    | METABRIC |
| MB-7038      | TAL1  | cna | gain    | METABRIC |
| MB-0420      | TAL1  | cna | hetloss | METABRIC |
| PD11742      | TAL1  | cna | hetloss | BASIS    |
| PD13296      | TAL1  | cna | gain    | BASIS    |
| PD13299      | TAL1  | cna | gain    | BASIS    |
| PD24186      | TAL1  | cna | amp     | BASIS    |
| PD24206      | TAL1  | cna | gain    | BASIS    |
| PD3905       | TAL1  | cna | gain    | BASIS    |
| PD4006       | TAL1  | cna | gain    | BASIS    |
| PD4107       | TAL1  | cna | gain    | BASIS    |
| PD4826       | TAL1  | cna | gain    | BASIS    |

|              |      |     |         |          |
|--------------|------|-----|---------|----------|
| PD5935       | TAL1 | cna | gain    | BASIS    |
| PD5945       | TAL1 | cna | amp     | BASIS    |
| PD5948       | TAL1 | cna | gain    | BASIS    |
| PD7067       | TAL1 | cna | gain    | BASIS    |
| PD7215       | TAL1 | cna | gain    | BASIS    |
| PD8621       | TAL1 | cna | gain    | BASIS    |
| PD9004       | TAL1 | cna | gain    | BASIS    |
| PD9702       | TAL1 | cna | gain    | BASIS    |
| TCGA-AO-A0JL | TPM4 | cna | gain    | TCGA     |
| TCGA-BH-A0C0 | TPM4 | cna | gain    | TCGA     |
| TCGA-BH-A1FU | TPM4 | cna | hetloss | TCGA     |
| TCGA-C8-A12L | TPM4 | cna | gain    | TCGA     |
| TCGA-D8-A27M | TPM4 | cna | hetloss | TCGA     |
| TCGA-EW-A10X | TPM4 | cna | hetloss | TCGA     |
| TCGA-LL-A5YP | TPM4 | cna | hetloss | TCGA     |
| MB-0346      | TPM4 | cna | hetloss | METABRIC |
| MB-2827      | TPM4 | cna | hetloss | METABRIC |
| MB-6098      | TPM4 | cna | hetloss | METABRIC |
| MB-0420      | TPM4 | cna | hetloss | METABRIC |
| MTS-T0064    | TPM4 | cna | amp     | METABRIC |
| PD13299      | TPM4 | cna | gain    | BASIS    |
| PD14442      | TPM4 | cna | hetloss | BASIS    |
| PD22355      | TPM4 | cna | gain    | BASIS    |
| PD23562      | TPM4 | cna | gain    | BASIS    |
| PD23574      | TPM4 | cna | gain    | BASIS    |
| PD24186      | TPM4 | cna | gain    | BASIS    |
| PD24206      | TPM4 | cna | hetloss | BASIS    |
| PD3905       | TPM4 | cna | gain    | BASIS    |
| PD4006       | TPM4 | cna | amp     | BASIS    |
| PD4107       | TPM4 | cna | gain    | BASIS    |
| PD4826       | TPM4 | cna | gain    | BASIS    |
| PD4967       | TPM4 | cna | hetloss | BASIS    |
| PD5930       | TPM4 | cna | gain    | BASIS    |
| PD5935       | TPM4 | cna | gain    | BASIS    |
| PD5945       | TPM4 | cna | amp     | BASIS    |
| PD5948       | TPM4 | cna | gain    | BASIS    |
| PD6413       | TPM4 | cna | gain    | BASIS    |
| PD7067       | TPM4 | cna | gain    | BASIS    |
| PD7215       | TPM4 | cna | amp     | BASIS    |
| PD9702       | TPM4 | cna | gain    | BASIS    |
| TCGA-AN-A0XU | WT1  | cna | gain    | TCGA     |
| TCGA-AO-A0JL | WT1  | cna | hetloss | TCGA     |
| TCGA-BH-A0C0 | WT1  | cna | gain    | TCGA     |
| TCGA-C8-A12L | WT1  | cna | hetloss | TCGA     |
| TCGA-E2-A1L7 | WT1  | cna | gain    | TCGA     |
| TCGA-LL-A5YP | WT1  | cna | gain    | TCGA     |
| MB-0346      | WT1  | cna | hetloss | METABRIC |

|              |      |     |         |          |
|--------------|------|-----|---------|----------|
| MB-6060      | WT1  | cna | amp     | METABRIC |
| MB-6098      | WT1  | cna | hetloss | METABRIC |
| MB-6271      | WT1  | cna | gain    | METABRIC |
| MB-7048      | WT1  | cna | hetloss | METABRIC |
| PD10014      | WT1  | cna | hetloss | BASIS    |
| PD11327      | WT1  | cna | homdel  | BASIS    |
| PD11742      | WT1  | cna | gain    | BASIS    |
| PD13296      | WT1  | cna | gain    | BASIS    |
| PD23578      | WT1  | cna | hetloss | BASIS    |
| PD24186      | WT1  | cna | gain    | BASIS    |
| PD3905       | WT1  | cna | gain    | BASIS    |
| PD4006       | WT1  | cna | gain    | BASIS    |
| PD4107       | WT1  | cna | gain    | BASIS    |
| PD4826       | WT1  | cna | gain    | BASIS    |
| PD5930       | WT1  | cna | gain    | BASIS    |
| PD5935       | WT1  | cna | gain    | BASIS    |
| PD5945       | WT1  | cna | gain    | BASIS    |
| PD5948       | WT1  | cna | gain    | BASIS    |
| PD6413       | WT1  | cna | hetloss | BASIS    |
| PD6731       | WT1  | cna | hetloss | BASIS    |
| PD7215       | WT1  | cna | gain    | BASIS    |
| PD8621       | WT1  | cna | gain    | BASIS    |
| PD8980       | WT1  | cna | hetloss | BASIS    |
| PD9585       | WT1  | cna | hetloss | BASIS    |
| PD9702       | WT1  | cna | gain    | BASIS    |
| TCGA-A2-A25B | XBP1 | cna | hetloss | TCGA     |
| TCGA-BH-A0C0 | XBP1 | cna | gain    | TCGA     |
| TCGA-BH-A1FU | XBP1 | cna | gain    | TCGA     |
| TCGA-C8-A12L | XBP1 | cna | gain    | TCGA     |
| TCGA-D8-A27M | XBP1 | cna | gain    | TCGA     |
| TCGA-E9-A1NC | XBP1 | cna | gain    | TCGA     |
| TCGA-LL-A5YP | XBP1 | cna | gain    | TCGA     |
| MB-0346      | XBP1 | cna | gain    | METABRIC |
| MB-6060      | XBP1 | cna | gain    | METABRIC |
| PD11327      | XBP1 | cna | gain    | BASIS    |
| PD13296      | XBP1 | cna | gain    | BASIS    |
| PD13297      | XBP1 | cna | gain    | BASIS    |
| PD13771      | XBP1 | cna | gain    | BASIS    |
| PD14442      | XBP1 | cna | hetloss | BASIS    |
| PD23562      | XBP1 | cna | gain    | BASIS    |
| PD23574      | XBP1 | cna | gain    | BASIS    |
| PD24206      | XBP1 | cna | hetloss | BASIS    |
| PD3905       | XBP1 | cna | gain    | BASIS    |
| PD4006       | XBP1 | cna | gain    | BASIS    |
| PD4107       | XBP1 | cna | gain    | BASIS    |
| PD4826       | XBP1 | cna | gain    | BASIS    |
| PD4967       | XBP1 | cna | hetloss | BASIS    |

|              |       |     |         |          |
|--------------|-------|-----|---------|----------|
| PD5930       | XBP1  | cna | gain    | BASIS    |
| PD5935       | XBP1  | cna | gain    | BASIS    |
| PD5945       | XBP1  | cna | amp     | BASIS    |
| PD5948       | XBP1  | cna | gain    | BASIS    |
| PD6731       | XBP1  | cna | hetloss | BASIS    |
| PD7067       | XBP1  | cna | gain    | BASIS    |
| PD7215       | XBP1  | cna | gain    | BASIS    |
| PD8621       | XBP1  | cna | gain    | BASIS    |
| PD9004       | XBP1  | cna | gain    | BASIS    |
| PD9702       | XBP1  | cna | gain    | BASIS    |
| TCGA-AN-A0XU | ZNF91 | cna | hetloss | TCGA     |
| TCGA-AO-A0JL | ZNF91 | cna | gain    | TCGA     |
| TCGA-BH-A0AW | ZNF91 | cna | gain    | TCGA     |
| TCGA-BH-A0C0 | ZNF91 | cna | gain    | TCGA     |
| TCGA-BH-A1FU | ZNF91 | cna | hetloss | TCGA     |
| TCGA-C8-A12L | ZNF91 | cna | gain    | TCGA     |
| TCGA-D8-A27M | ZNF91 | cna | hetloss | TCGA     |
| TCGA-E9-A1NC | ZNF91 | cna | hetloss | TCGA     |
| TCGA-EW-A10X | ZNF91 | cna | hetloss | TCGA     |
| TCGA-LL-A5YP | ZNF91 | cna | amp     | TCGA     |
| MB-0346      | ZNF91 | cna | hetloss | METABRIC |
| MB-2827      | ZNF91 | cna | hetloss | METABRIC |
| MB-6060      | ZNF91 | cna | amp     | METABRIC |
| MB-6098      | ZNF91 | cna | gain    | METABRIC |
| MB-0420      | ZNF91 | cna | hetloss | METABRIC |
| MTS-T0064    | ZNF91 | cna | gain    | METABRIC |
| PD13299      | ZNF91 | cna | gain    | BASIS    |
| PD13771      | ZNF91 | cna | gain    | BASIS    |
| PD23562      | ZNF91 | cna | gain    | BASIS    |
| PD23574      | ZNF91 | cna | gain    | BASIS    |
| PD24186      | ZNF91 | cna | amp     | BASIS    |
| PD24206      | ZNF91 | cna | hetloss | BASIS    |
| PD3905       | ZNF91 | cna | gain    | BASIS    |
| PD4006       | ZNF91 | cna | gain    | BASIS    |
| PD4826       | ZNF91 | cna | gain    | BASIS    |
| PD5930       | ZNF91 | cna | gain    | BASIS    |
| PD5935       | ZNF91 | cna | gain    | BASIS    |
| PD5945       | ZNF91 | cna | amp     | BASIS    |
| PD5948       | ZNF91 | cna | gain    | BASIS    |
| PD7067       | ZNF91 | cna | gain    | BASIS    |
| PD7215       | ZNF91 | cna | amp     | BASIS    |
| PD9702       | ZNF91 | cna | gain    | BASIS    |
| TCGA-A2-A25B | AARS2 | cna | hetloss | TCGA     |
| TCGA-AO-A0JL | AARS2 | cna | hetloss | TCGA     |
| TCGA-BH-A0AW | AARS2 | cna | gain    | TCGA     |
| TCGA-BH-A0C0 | AARS2 | cna | hetloss | TCGA     |
| TCGA-C8-A12L | AARS2 | cna | gain    | TCGA     |



|                   |       |     |         |            |
|-------------------|-------|-----|---------|------------|
| TCGA-D8-A27M      | AARS2 | cna | gain    | TCGA       |
| MB-5070           | AARS2 | cna | gain    | METABRIC   |
| MB-6060           | AARS2 | cna | hetloss | METABRIC   |
| MB-7032           | AARS2 | cna | gain    | METABRIC   |
| MB-7038           | AARS2 | cna | hetloss | METABRIC   |
| PD11327           | AARS2 | cna | amp     | BASIS      |
| PD13296           | AARS2 | cna | gain    | BASIS      |
| PD13299           | AARS2 | cna | gain    | BASIS      |
| PD22355           | AARS2 | cna | gain    | BASIS      |
| PD23562           | AARS2 | cna | gain    | BASIS      |
| PD24186           | AARS2 | cna | gain    | BASIS      |
| PD24206           | AARS2 | cna | gain    | BASIS      |
| PD3905            | AARS2 | cna | amp     | BASIS      |
| PD4006            | AARS2 | cna | gain    | BASIS      |
| PD4107            | AARS2 | cna | gain    | BASIS      |
| PD4826            | AARS2 | cna | gain    | BASIS      |
| PD5935            | AARS2 | cna | gain    | BASIS      |
| PD5945            | AARS2 | cna | amp     | BASIS      |
| PD5948            | AARS2 | cna | gain    | BASIS      |
| PD7067            | AARS2 | cna | amp     | BASIS      |
| PD7215            | AARS2 | cna | gain    | BASIS      |
| PD8621            | AARS2 | cna | gain    | BASIS      |
| PD8980            | AARS2 | cna | hetloss | BASIS      |
| PD9004            | AARS2 | cna | gain    | BASIS      |
| PD9585            | AARS2 | cna | gain    | BASIS      |
| PD9702            | AARS2 | cna | gain    | BASIS      |
| TCGA-A2-A25B      | ASXL1 | cna | gain    | TCGA       |
| TCGA-AO-A0JL      | ASXL1 | cna | gain    | TCGA       |
| TCGA-BH-A0AW      | ASXL1 | cna | gain    | TCGA       |
| TCGA-BH-A0C0      | ASXL1 | cna | gain    | TCGA       |
| TCGA-C8-A12L      | ASXL1 | cna | gain    | TCGA       |
| TCGA-D8-A27M      | ASXL1 | cna | gain    | TCGA       |
| TCGA-E2-A1L7      | ASXL1 | cna | gain    | TCGA       |
| TCGA-E9-A1NC      | ASXL1 | cna | hetloss | TCGA       |
| TCGA-LL-A5YP      | ASXL1 | cna | gain    | TCGA       |
| MB-0346           | ASXL1 | cna | gain    | METABRIC   |
| MB-5070           | ASXL1 | cna | amp     | METABRIC   |
| MB-6060           | ASXL1 | cna | gain    | METABRIC   |
| MB-7038           | ASXL1 | cna | hetloss | METABRIC   |
| P-0010758-T01-IM5 | ASXL1 | cna | amp     | MSK-IMPACT |
| PD11327           | ASXL1 | cna | homdel  | BASIS      |
| PD13296           | ASXL1 | cna | hetloss | BASIS      |
| PD13299           | ASXL1 | cna | gain    | BASIS      |
| PD23574           | ASXL1 | cna | gain    | BASIS      |
| PD24186           | ASXL1 | cna | gain    | BASIS      |
| PD24206           | ASXL1 | cna | gain    | BASIS      |
| PD3905            | ASXL1 | cna | gain    | BASIS      |

|              |       |     |         |          |
|--------------|-------|-----|---------|----------|
| PD4107       | ASXL1 | cna | amp     | BASIS    |
| PD4826       | ASXL1 | cna | gain    | BASIS    |
| PD5930       | ASXL1 | cna | gain    | BASIS    |
| PD5935       | ASXL1 | cna | gain    | BASIS    |
| PD5945       | ASXL1 | cna | amp     | BASIS    |
| PD5948       | ASXL1 | cna | gain    | BASIS    |
| PD7067       | ASXL1 | cna | gain    | BASIS    |
| PD7215       | ASXL1 | cna | gain    | BASIS    |
| PD9004       | ASXL1 | cna | gain    | BASIS    |
| PD9702       | ASXL1 | cna | gain    | BASIS    |
| TCGA-AN-A0XU | ASXL3 | cna | hetloss | TCGA     |
| TCGA-AO-A0JL | ASXL3 | cna | gain    | TCGA     |
| TCGA-BH-A0AW | ASXL3 | cna | hetloss | TCGA     |
| TCGA-BH-A0C0 | ASXL3 | cna | gain    | TCGA     |
| TCGA-C8-A12L | ASXL3 | cna | gain    | TCGA     |
| TCGA-D8-A27M | ASXL3 | cna | hetloss | TCGA     |
| TCGA-E2-A1L7 | ASXL3 | cna | gain    | TCGA     |
| TCGA-LL-A5YP | ASXL3 | cna | gain    | TCGA     |
| MB-0346      | ASXL3 | cna | hetloss | METABRIC |
| PD10014      | ASXL3 | cna | hetloss | BASIS    |
| PD11327      | ASXL3 | cna | gain    | BASIS    |
| PD13297      | ASXL3 | cna | gain    | BASIS    |
| PD13299      | ASXL3 | cna | gain    | BASIS    |
| PD23578      | ASXL3 | cna | gain    | BASIS    |
| PD24186      | ASXL3 | cna | gain    | BASIS    |
| PD24202      | ASXL3 | cna | hetloss | BASIS    |
| PD24206      | ASXL3 | cna | gain    | BASIS    |
| PD24337      | ASXL3 | cna | gain    | BASIS    |
| PD3905       | ASXL3 | cna | gain    | BASIS    |
| PD4006       | ASXL3 | cna | gain    | BASIS    |
| PD4107       | ASXL3 | cna | gain    | BASIS    |
| PD4967       | ASXL3 | cna | hetloss | BASIS    |
| PD5930       | ASXL3 | cna | gain    | BASIS    |
| PD5945       | ASXL3 | cna | gain    | BASIS    |
| PD5948       | ASXL3 | cna | gain    | BASIS    |
| PD6406       | ASXL3 | cna | gain    | BASIS    |
| PD7067       | ASXL3 | cna | amp     | BASIS    |
| PD7215       | ASXL3 | cna | gain    | BASIS    |
| PD8980       | ASXL3 | cna | hetloss | BASIS    |
| PD9004       | ASXL3 | cna | hetloss | BASIS    |
| PD9702       | ASXL3 | cna | gain    | BASIS    |
| TCGA-AN-A0XU | ATIC  | cna | gain    | TCGA     |
| TCGA-AO-A0JL | ATIC  | cna | gain    | TCGA     |
| TCGA-BH-A0AW | ATIC  | cna | hetloss | TCGA     |
| TCGA-C8-A12L | ATIC  | cna | gain    | TCGA     |
| TCGA-D8-A27M | ATIC  | cna | gain    | TCGA     |
| TCGA-E2-A1L7 | ATIC  | cna | hetloss | TCGA     |

|              |      |     |         |          |
|--------------|------|-----|---------|----------|
| TCGA-E9-A1NC | ATIC | cna | hetloss | TCGA     |
| MB-2827      | ATIC | cna | hetloss | METABRIC |
| MB-6098      | ATIC | cna | hetloss | METABRIC |
| MB-6271      | ATIC | cna | hetloss | METABRIC |
| PD10014      | ATIC | cna | gain    | BASIS    |
| PD11327      | ATIC | cna | gain    | BASIS    |
| PD13296      | ATIC | cna | hetloss | BASIS    |
| PD13297      | ATIC | cna | hetloss | BASIS    |
| PD23578      | ATIC | cna | hetloss | BASIS    |
| PD24186      | ATIC | cna | gain    | BASIS    |
| PD24206      | ATIC | cna | gain    | BASIS    |
| PD24337      | ATIC | cna | hetloss | BASIS    |
| PD3890       | ATIC | cna | hetloss | BASIS    |
| PD3905       | ATIC | cna | gain    | BASIS    |
| PD4006       | ATIC | cna | gain    | BASIS    |
| PD4107       | ATIC | cna | gain    | BASIS    |
| PD4967       | ATIC | cna | hetloss | BASIS    |
| PD5935       | ATIC | cna | gain    | BASIS    |
| PD5945       | ATIC | cna | gain    | BASIS    |
| PD5948       | ATIC | cna | gain    | BASIS    |
| PD6413       | ATIC | cna | hetloss | BASIS    |
| PD6731       | ATIC | cna | hetloss | BASIS    |
| PD7067       | ATIC | cna | gain    | BASIS    |
| PD7215       | ATIC | cna | gain    | BASIS    |
| PD9585       | ATIC | cna | hetloss | BASIS    |
| TCGA-AN-A0XU | AXL  | cna | hetloss | TCGA     |
| TCGA-AO-A0JL | AXL  | cna | hetloss | TCGA     |
| TCGA-BH-A0AW | AXL  | cna | gain    | TCGA     |
| TCGA-BH-A0C0 | AXL  | cna | hetloss | TCGA     |
| TCGA-BH-A1FU | AXL  | cna | hetloss | TCGA     |
| TCGA-D8-A27M | AXL  | cna | gain    | TCGA     |
| TCGA-EW-A10X | AXL  | cna | hetloss | TCGA     |
| TCGA-LL-A5YP | AXL  | cna | gain    | TCGA     |
| MB-0346      | AXL  | cna | hetloss | METABRIC |
| MB-6098      | AXL  | cna | hetloss | METABRIC |
| PD13296      | AXL  | cna | hetloss | BASIS    |
| PD13299      | AXL  | cna | gain    | BASIS    |
| PD13771      | AXL  | cna | hetloss | BASIS    |
| PD23562      | AXL  | cna | gain    | BASIS    |
| PD23574      | AXL  | cna | gain    | BASIS    |
| PD23578      | AXL  | cna | gain    | BASIS    |
| PD24186      | AXL  | cna | gain    | BASIS    |
| PD3905       | AXL  | cna | gain    | BASIS    |
| PD4005       | AXL  | cna | hetloss | BASIS    |
| PD4006       | AXL  | cna | gain    | BASIS    |
| PD4826       | AXL  | cna | gain    | BASIS    |
| PD5935       | AXL  | cna | gain    | BASIS    |

|              |       |     |         |          |
|--------------|-------|-----|---------|----------|
| PD5945       | AXL   | cna | gain    | BASIS    |
| PD5948       | AXL   | cna | gain    | BASIS    |
| PD6406       | AXL   | cna | gain    | BASIS    |
| PD7067       | AXL   | cna | gain    | BASIS    |
| PD7215       | AXL   | cna | gain    | BASIS    |
| PD8621       | AXL   | cna | gain    | BASIS    |
| PD8980       | AXL   | cna | hetloss | BASIS    |
| PD9585       | AXL   | cna | gain    | BASIS    |
| PD9702       | AXL   | cna | gain    | BASIS    |
| TCGA-AO-A0JL | BCL3  | cna | hetloss | TCGA     |
| TCGA-BH-A0AW | BCL3  | cna | gain    | TCGA     |
| TCGA-BH-A0C0 | BCL3  | cna | hetloss | TCGA     |
| TCGA-BH-A1FU | BCL3  | cna | hetloss | TCGA     |
| TCGA-D8-A27M | BCL3  | cna | gain    | TCGA     |
| TCGA-EW-A10X | BCL3  | cna | hetloss | TCGA     |
| TCGA-LL-A5YP | BCL3  | cna | gain    | TCGA     |
| MB-0346      | BCL3  | cna | hetloss | METABRIC |
| MB-6098      | BCL3  | cna | hetloss | METABRIC |
| PD11327      | BCL3  | cna | gain    | BASIS    |
| PD13296      | BCL3  | cna | hetloss | BASIS    |
| PD13299      | BCL3  | cna | gain    | BASIS    |
| PD13771      | BCL3  | cna | hetloss | BASIS    |
| PD23562      | BCL3  | cna | gain    | BASIS    |
| PD23574      | BCL3  | cna | gain    | BASIS    |
| PD24186      | BCL3  | cna | gain    | BASIS    |
| PD24206      | BCL3  | cna | hetloss | BASIS    |
| PD3905       | BCL3  | cna | gain    | BASIS    |
| PD4005       | BCL3  | cna | hetloss | BASIS    |
| PD4006       | BCL3  | cna | gain    | BASIS    |
| PD4826       | BCL3  | cna | gain    | BASIS    |
| PD5935       | BCL3  | cna | gain    | BASIS    |
| PD5945       | BCL3  | cna | amp     | BASIS    |
| PD5948       | BCL3  | cna | gain    | BASIS    |
| PD6406       | BCL3  | cna | gain    | BASIS    |
| PD7067       | BCL3  | cna | gain    | BASIS    |
| PD7215       | BCL3  | cna | gain    | BASIS    |
| PD8621       | BCL3  | cna | gain    | BASIS    |
| PD8980       | BCL3  | cna | hetloss | BASIS    |
| PD9585       | BCL3  | cna | gain    | BASIS    |
| PD9702       | BCL3  | cna | gain    | BASIS    |
| TCGA-A2-A25B | CCND3 | cna | hetloss | TCGA     |
| TCGA-AO-A0JL | CCND3 | cna | gain    | TCGA     |
| TCGA-BH-A0AW | CCND3 | cna | gain    | TCGA     |
| TCGA-BH-A0C0 | CCND3 | cna | hetloss | TCGA     |
| TCGA-C8-A12L | CCND3 | cna | hetloss | TCGA     |
| TCGA-E2-A1L7 | CCND3 | cna | hetloss | TCGA     |
| TCGA-E9-A1NC | CCND3 | cna | amp     | TCGA     |

|              |       |     |         |          |
|--------------|-------|-----|---------|----------|
| MB-5070      | CCND3 | cna | gain    | METABRIC |
| MB-6060      | CCND3 | cna | hetloss | METABRIC |
| MB-7032      | CCND3 | cna | gain    | METABRIC |
| PD11327      | CCND3 | cna | amp     | BASIS    |
| PD13299      | CCND3 | cna | gain    | BASIS    |
| PD22355      | CCND3 | cna | gain    | BASIS    |
| PD23562      | CCND3 | cna | gain    | BASIS    |
| PD24186      | CCND3 | cna | gain    | BASIS    |
| PD24206      | CCND3 | cna | gain    | BASIS    |
| PD3905       | CCND3 | cna | amp     | BASIS    |
| PD4006       | CCND3 | cna | gain    | BASIS    |
| PD4107       | CCND3 | cna | gain    | BASIS    |
| PD4826       | CCND3 | cna | gain    | BASIS    |
| PD4967       | CCND3 | cna | hetloss | BASIS    |
| PD5935       | CCND3 | cna | gain    | BASIS    |
| PD5945       | CCND3 | cna | amp     | BASIS    |
| PD5948       | CCND3 | cna | gain    | BASIS    |
| PD7067       | CCND3 | cna | amp     | BASIS    |
| PD7215       | CCND3 | cna | gain    | BASIS    |
| PD8621       | CCND3 | cna | gain    | BASIS    |
| PD8980       | CCND3 | cna | hetloss | BASIS    |
| PD9004       | CCND3 | cna | gain    | BASIS    |
| PD9585       | CCND3 | cna | gain    | BASIS    |
| PD9702       | CCND3 | cna | amp     | BASIS    |
| TCGA-AO-A0JL | CD79A | cna | hetloss | TCGA     |
| TCGA-BH-A0AW | CD79A | cna | gain    | TCGA     |
| TCGA-BH-A0C0 | CD79A | cna | hetloss | TCGA     |
| TCGA-BH-A1FU | CD79A | cna | hetloss | TCGA     |
| TCGA-D8-A27M | CD79A | cna | gain    | TCGA     |
| TCGA-E9-A1NC | CD79A | cna | gain    | TCGA     |
| TCGA-EW-A1OX | CD79A | cna | hetloss | TCGA     |
| TCGA-LL-A5YP | CD79A | cna | gain    | TCGA     |
| MB-0346      | CD79A | cna | hetloss | METABRIC |
| MB-6098      | CD79A | cna | hetloss | METABRIC |
| PD11327      | CD79A | cna | gain    | BASIS    |
| PD13296      | CD79A | cna | hetloss | BASIS    |
| PD13299      | CD79A | cna | gain    | BASIS    |
| PD13771      | CD79A | cna | hetloss | BASIS    |
| PD23562      | CD79A | cna | gain    | BASIS    |
| PD23574      | CD79A | cna | gain    | BASIS    |
| PD24186      | CD79A | cna | gain    | BASIS    |
| PD3905       | CD79A | cna | gain    | BASIS    |
| PD4005       | CD79A | cna | hetloss | BASIS    |
| PD4006       | CD79A | cna | gain    | BASIS    |
| PD4826       | CD79A | cna | gain    | BASIS    |
| PD5935       | CD79A | cna | gain    | BASIS    |
| PD5945       | CD79A | cna | gain    | BASIS    |

|              |       |     |         |          |
|--------------|-------|-----|---------|----------|
| PD5948       | CD79A | cna | gain    | BASIS    |
| PD6406       | CD79A | cna | gain    | BASIS    |
| PD7067       | CD79A | cna | gain    | BASIS    |
| PD7215       | CD79A | cna | gain    | BASIS    |
| PD8621       | CD79A | cna | gain    | BASIS    |
| PD8980       | CD79A | cna | hetloss | BASIS    |
| PD9585       | CD79A | cna | gain    | BASIS    |
| PD9702       | CD79A | cna | gain    | BASIS    |
| TCGA-A2-A25B | CHEK2 | cna | hetloss | TCGA     |
| TCGA-BH-A0C0 | CHEK2 | cna | gain    | TCGA     |
| TCGA-BH-A1FU | CHEK2 | cna | gain    | TCGA     |
| TCGA-C8-A12L | CHEK2 | cna | gain    | TCGA     |
| TCGA-D8-A27M | CHEK2 | cna | gain    | TCGA     |
| TCGA-E9-A1NC | CHEK2 | cna | gain    | TCGA     |
| TCGA-LL-A5YP | CHEK2 | cna | gain    | TCGA     |
| MB-0346      | CHEK2 | cna | gain    | METABRIC |
| MB-6060      | CHEK2 | cna | gain    | METABRIC |
| PD11327      | CHEK2 | cna | gain    | BASIS    |
| PD13296      | CHEK2 | cna | gain    | BASIS    |
| PD13297      | CHEK2 | cna | gain    | BASIS    |
| PD14442      | CHEK2 | cna | hetloss | BASIS    |
| PD23562      | CHEK2 | cna | gain    | BASIS    |
| PD23574      | CHEK2 | cna | gain    | BASIS    |
| PD24206      | CHEK2 | cna | hetloss | BASIS    |
| PD3905       | CHEK2 | cna | gain    | BASIS    |
| PD4006       | CHEK2 | cna | gain    | BASIS    |
| PD4107       | CHEK2 | cna | gain    | BASIS    |
| PD4826       | CHEK2 | cna | gain    | BASIS    |
| PD4967       | CHEK2 | cna | hetloss | BASIS    |
| PD5930       | CHEK2 | cna | gain    | BASIS    |
| PD5935       | CHEK2 | cna | gain    | BASIS    |
| PD5945       | CHEK2 | cna | amp     | BASIS    |
| PD5948       | CHEK2 | cna | gain    | BASIS    |
| PD6731       | CHEK2 | cna | hetloss | BASIS    |
| PD7067       | CHEK2 | cna | gain    | BASIS    |
| PD7215       | CHEK2 | cna | gain    | BASIS    |
| PD8621       | CHEK2 | cna | gain    | BASIS    |
| PD9004       | CHEK2 | cna | gain    | BASIS    |
| PD9702       | CHEK2 | cna | gain    | BASIS    |
| TCGA-AN-A0XU | CHIC2 | cna | gain    | TCGA     |
| TCGA-AO-A0JL | CHIC2 | cna | gain    | TCGA     |
| TCGA-BH-A0C0 | CHIC2 | cna | gain    | TCGA     |
| TCGA-BH-A1FU | CHIC2 | cna | gain    | TCGA     |
| TCGA-C8-A12L | CHIC2 | cna | gain    | TCGA     |
| TCGA-D8-A27M | CHIC2 | cna | gain    | TCGA     |
| TCGA-E9-A1NC | CHIC2 | cna | hetloss | TCGA     |
| TCGA-LL-A5YP | CHIC2 | cna | amp     | TCGA     |

|              |       |     |         |          |
|--------------|-------|-----|---------|----------|
| MB-5465      | CHIC2 | cna | hetloss | METABRIC |
| MB-6060      | CHIC2 | cna | gain    | METABRIC |
| MB-6098      | CHIC2 | cna | amp     | METABRIC |
| MB-7038      | CHIC2 | cna | gain    | METABRIC |
| MB-0420      | CHIC2 | cna | hetloss | METABRIC |
| PD11327      | CHIC2 | cna | amp     | BASIS    |
| PD13296      | CHIC2 | cna | hetloss | BASIS    |
| PD13297      | CHIC2 | cna | hetloss | BASIS    |
| PD22355      | CHIC2 | cna | hetloss | BASIS    |
| PD23574      | CHIC2 | cna | gain    | BASIS    |
| PD24206      | CHIC2 | cna | gain    | BASIS    |
| PD3890       | CHIC2 | cna | gain    | BASIS    |
| PD3905       | CHIC2 | cna | gain    | BASIS    |
| PD4006       | CHIC2 | cna | gain    | BASIS    |
| PD4107       | CHIC2 | cna | gain    | BASIS    |
| PD4826       | CHIC2 | cna | gain    | BASIS    |
| PD5935       | CHIC2 | cna | gain    | BASIS    |
| PD5945       | CHIC2 | cna | gain    | BASIS    |
| PD5948       | CHIC2 | cna | gain    | BASIS    |
| PD7215       | CHIC2 | cna | amp     | BASIS    |
| PD8980       | CHIC2 | cna | hetloss | BASIS    |
| PD9004       | CHIC2 | cna | gain    | BASIS    |
| PD9702       | CHIC2 | cna | gain    | BASIS    |
| TCGA-AO-A0JL | CIC   | cna | hetloss | TCGA     |
| TCGA-BH-A0AW | CIC   | cna | gain    | TCGA     |
| TCGA-BH-A0C0 | CIC   | cna | hetloss | TCGA     |
| TCGA-BH-A1FU | CIC   | cna | hetloss | TCGA     |
| TCGA-D8-A27M | CIC   | cna | gain    | TCGA     |
| TCGA-E9-A1NC | CIC   | cna | gain    | TCGA     |
| TCGA-EW-A10X | CIC   | cna | hetloss | TCGA     |
| TCGA-LL-A5YP | CIC   | cna | gain    | TCGA     |
| MB-0346      | CIC   | cna | hetloss | METABRIC |
| MB-6098      | CIC   | cna | hetloss | METABRIC |
| PD11327      | CIC   | cna | gain    | BASIS    |
| PD13296      | CIC   | cna | hetloss | BASIS    |
| PD13299      | CIC   | cna | gain    | BASIS    |
| PD13771      | CIC   | cna | hetloss | BASIS    |
| PD23562      | CIC   | cna | gain    | BASIS    |
| PD23574      | CIC   | cna | gain    | BASIS    |
| PD24186      | CIC   | cna | gain    | BASIS    |
| PD3905       | CIC   | cna | gain    | BASIS    |
| PD4005       | CIC   | cna | hetloss | BASIS    |
| PD4006       | CIC   | cna | gain    | BASIS    |
| PD4826       | CIC   | cna | gain    | BASIS    |
| PD5935       | CIC   | cna | gain    | BASIS    |
| PD5945       | CIC   | cna | gain    | BASIS    |
| PD5948       | CIC   | cna | gain    | BASIS    |

|              |      |     |         |          |
|--------------|------|-----|---------|----------|
| PD6406       | CIC  | cna | gain    | BASIS    |
| PD7067       | CIC  | cna | gain    | BASIS    |
| PD7215       | CIC  | cna | gain    | BASIS    |
| PD8621       | CIC  | cna | gain    | BASIS    |
| PD8980       | CIC  | cna | hetloss | BASIS    |
| PD9585       | CIC  | cna | gain    | BASIS    |
| PD9702       | CIC  | cna | gain    | BASIS    |
| TCGA-AN-A0XU | DAXX | cna | gain    | TCGA     |
| TCGA-AO-A0JL | DAXX | cna | gain    | TCGA     |
| TCGA-BH-A0AW | DAXX | cna | gain    | TCGA     |
| TCGA-BH-A0C0 | DAXX | cna | hetloss | TCGA     |
| TCGA-BH-A18R | DAXX | cna | gain    | TCGA     |
| TCGA-C8-A12L | DAXX | cna | hetloss | TCGA     |
| TCGA-E2-A1L7 | DAXX | cna | hetloss | TCGA     |
| TCGA-E9-A1NC | DAXX | cna | amp     | TCGA     |
| MB-7032      | DAXX | cna | gain    | METABRIC |
| PD10014      | DAXX | cna | hetloss | BASIS    |
| PD11327      | DAXX | cna | hetloss | BASIS    |
| PD13296      | DAXX | cna | gain    | BASIS    |
| PD13299      | DAXX | cna | gain    | BASIS    |
| PD23562      | DAXX | cna | gain    | BASIS    |
| PD23578      | DAXX | cna | gain    | BASIS    |
| PD24186      | DAXX | cna | gain    | BASIS    |
| PD24206      | DAXX | cna | gain    | BASIS    |
| PD3905       | DAXX | cna | gain    | BASIS    |
| PD4006       | DAXX | cna | gain    | BASIS    |
| PD4107       | DAXX | cna | gain    | BASIS    |
| PD4826       | DAXX | cna | gain    | BASIS    |
| PD5935       | DAXX | cna | gain    | BASIS    |
| PD5945       | DAXX | cna | amp     | BASIS    |
| PD5948       | DAXX | cna | gain    | BASIS    |
| PD6731       | DAXX | cna | hetloss | BASIS    |
| PD7067       | DAXX | cna | amp     | BASIS    |
| PD7215       | DAXX | cna | gain    | BASIS    |
| PD8621       | DAXX | cna | amp     | BASIS    |
| PD9004       | DAXX | cna | gain    | BASIS    |
| PD9585       | DAXX | cna | gain    | BASIS    |
| PD9702       | DAXX | cna | amp     | BASIS    |
| TCGA-AN-A0XU | DDB2 | cna | hetloss | TCGA     |
| TCGA-AO-A0JL | DDB2 | cna | hetloss | TCGA     |
| TCGA-BH-A0C0 | DDB2 | cna | hetloss | TCGA     |
| TCGA-C8-A12L | DDB2 | cna | hetloss | TCGA     |
| TCGA-LL-A5YP | DDB2 | cna | gain    | TCGA     |
| MB-0346      | DDB2 | cna | hetloss | METABRIC |
| MB-6060      | DDB2 | cna | gain    | METABRIC |
| MB-6098      | DDB2 | cna | hetloss | METABRIC |
| MB-6271      | DDB2 | cna | gain    | METABRIC |



|              |      |     |         |          |
|--------------|------|-----|---------|----------|
| MB-7038      | DDB2 | cna | gain    | METABRIC |
| PD10014      | DDB2 | cna | hetloss | BASIS    |
| PD11327      | DDB2 | cna | homdel  | BASIS    |
| PD13296      | DDB2 | cna | hetloss | BASIS    |
| PD13771      | DDB2 | cna | hetloss | BASIS    |
| PD23574      | DDB2 | cna | gain    | BASIS    |
| PD24186      | DDB2 | cna | gain    | BASIS    |
| PD24206      | DDB2 | cna | gain    | BASIS    |
| PD3905       | DDB2 | cna | gain    | BASIS    |
| PD4006       | DDB2 | cna | gain    | BASIS    |
| PD4107       | DDB2 | cna | gain    | BASIS    |
| PD4826       | DDB2 | cna | gain    | BASIS    |
| PD5935       | DDB2 | cna | gain    | BASIS    |
| PD5945       | DDB2 | cna | gain    | BASIS    |
| PD5948       | DDB2 | cna | gain    | BASIS    |
| PD6406       | DDB2 | cna | hetloss | BASIS    |
| PD6413       | DDB2 | cna | hetloss | BASIS    |
| PD7215       | DDB2 | cna | gain    | BASIS    |
| PD8621       | DDB2 | cna | gain    | BASIS    |
| PD8980       | DDB2 | cna | hetloss | BASIS    |
| PD9585       | DDB2 | cna | hetloss | BASIS    |
| PD9702       | DDB2 | cna | gain    | BASIS    |
| TCGA-A2-A25B | EML4 | cna | hetloss | TCGA     |
| TCGA-AN-A0XU | EML4 | cna | gain    | TCGA     |
| TCGA-AO-A0JL | EML4 | cna | gain    | TCGA     |
| TCGA-BH-A0AW | EML4 | cna | gain    | TCGA     |
| TCGA-BH-A0C0 | EML4 | cna | gain    | TCGA     |
| TCGA-C8-A12L | EML4 | cna | gain    | TCGA     |
| TCGA-D8-A27M | EML4 | cna | gain    | TCGA     |
| TCGA-LL-A5YP | EML4 | cna | gain    | TCGA     |
| MB-5465      | EML4 | cna | gain    | METABRIC |
| MB-6271      | EML4 | cna | hetloss | METABRIC |
| PD10014      | EML4 | cna | gain    | BASIS    |
| PD13299      | EML4 | cna | gain    | BASIS    |
| PD23562      | EML4 | cna | gain    | BASIS    |
| PD23578      | EML4 | cna | gain    | BASIS    |
| PD24186      | EML4 | cna | amp     | BASIS    |
| PD24206      | EML4 | cna | gain    | BASIS    |
| PD3890       | EML4 | cna | hetloss | BASIS    |
| PD3905       | EML4 | cna | gain    | BASIS    |
| PD4006       | EML4 | cna | amp     | BASIS    |
| PD4107       | EML4 | cna | gain    | BASIS    |
| PD5930       | EML4 | cna | gain    | BASIS    |
| PD5935       | EML4 | cna | gain    | BASIS    |
| PD5945       | EML4 | cna | gain    | BASIS    |
| PD5948       | EML4 | cna | gain    | BASIS    |
| PD6406       | EML4 | cna | hetloss | BASIS    |

|              |        |     |         |          |
|--------------|--------|-----|---------|----------|
| PD7067       | EML4   | cna | gain    | BASIS    |
| PD8621       | EML4   | cna | gain    | BASIS    |
| PD8980       | EML4   | cna | gain    | BASIS    |
| PD9004       | EML4   | cna | gain    | BASIS    |
| PD9585       | EML4   | cna | hetloss | BASIS    |
| PD9702       | EML4   | cna | gain    | BASIS    |
| TCGA-AO-A0JL | ERCC2  | cna | hetloss | TCGA     |
| TCGA-BH-A0AW | ERCC2  | cna | gain    | TCGA     |
| TCGA-BH-A0C0 | ERCC2  | cna | hetloss | TCGA     |
| TCGA-BH-A1FU | ERCC2  | cna | hetloss | TCGA     |
| TCGA-D8-A27M | ERCC2  | cna | gain    | TCGA     |
| TCGA-E2-A1L7 | ERCC2  | cna | hetloss | TCGA     |
| TCGA-EW-A10X | ERCC2  | cna | hetloss | TCGA     |
| TCGA-LL-A5YP | ERCC2  | cna | gain    | TCGA     |
| MB-0346      | ERCC2  | cna | hetloss | METABRIC |
| MB-6098      | ERCC2  | cna | hetloss | METABRIC |
| PD11327      | ERCC2  | cna | gain    | BASIS    |
| PD13296      | ERCC2  | cna | hetloss | BASIS    |
| PD13299      | ERCC2  | cna | gain    | BASIS    |
| PD13771      | ERCC2  | cna | hetloss | BASIS    |
| PD23562      | ERCC2  | cna | gain    | BASIS    |
| PD23574      | ERCC2  | cna | gain    | BASIS    |
| PD24186      | ERCC2  | cna | gain    | BASIS    |
| PD24206      | ERCC2  | cna | hetloss | BASIS    |
| PD3905       | ERCC2  | cna | gain    | BASIS    |
| PD4005       | ERCC2  | cna | hetloss | BASIS    |
| PD4006       | ERCC2  | cna | gain    | BASIS    |
| PD4826       | ERCC2  | cna | gain    | BASIS    |
| PD5935       | ERCC2  | cna | gain    | BASIS    |
| PD5945       | ERCC2  | cna | amp     | BASIS    |
| PD5948       | ERCC2  | cna | gain    | BASIS    |
| PD6406       | ERCC2  | cna | gain    | BASIS    |
| PD7067       | ERCC2  | cna | gain    | BASIS    |
| PD7215       | ERCC2  | cna | gain    | BASIS    |
| PD8621       | ERCC2  | cna | gain    | BASIS    |
| PD8980       | ERCC2  | cna | hetloss | BASIS    |
| PD9585       | ERCC2  | cna | gain    | BASIS    |
| TCGA-AN-A0XU | FIP1L1 | cna | gain    | TCGA     |
| TCGA-AO-A0JL | FIP1L1 | cna | gain    | TCGA     |
| TCGA-BH-A0C0 | FIP1L1 | cna | gain    | TCGA     |
| TCGA-BH-A1FU | FIP1L1 | cna | gain    | TCGA     |
| TCGA-C8-A12L | FIP1L1 | cna | gain    | TCGA     |
| TCGA-D8-A27M | FIP1L1 | cna | gain    | TCGA     |
| TCGA-E9-A1NC | FIP1L1 | cna | hetloss | TCGA     |
| TCGA-LL-A5YP | FIP1L1 | cna | amp     | TCGA     |
| MB-0346      | FIP1L1 | cna | gain    | METABRIC |
| MB-5465      | FIP1L1 | cna | hetloss | METABRIC |

|              |        |     |         |          |
|--------------|--------|-----|---------|----------|
| MB-6060      | FIP1L1 | cna | gain    | METABRIC |
| MB-6098      | FIP1L1 | cna | amp     | METABRIC |
| MB-7038      | FIP1L1 | cna | gain    | METABRIC |
| MB-0420      | FIP1L1 | cna | hetloss | METABRIC |
| PD11327      | FIP1L1 | cna | gain    | BASIS    |
| PD13296      | FIP1L1 | cna | hetloss | BASIS    |
| PD13297      | FIP1L1 | cna | hetloss | BASIS    |
| PD22355      | FIP1L1 | cna | hetloss | BASIS    |
| PD23574      | FIP1L1 | cna | gain    | BASIS    |
| PD24206      | FIP1L1 | cna | gain    | BASIS    |
| PD3905       | FIP1L1 | cna | gain    | BASIS    |
| PD4006       | FIP1L1 | cna | gain    | BASIS    |
| PD4107       | FIP1L1 | cna | gain    | BASIS    |
| PD4826       | FIP1L1 | cna | gain    | BASIS    |
| PD5935       | FIP1L1 | cna | gain    | BASIS    |
| PD5945       | FIP1L1 | cna | gain    | BASIS    |
| PD5948       | FIP1L1 | cna | gain    | BASIS    |
| PD7215       | FIP1L1 | cna | amp     | BASIS    |
| PD8980       | FIP1L1 | cna | hetloss | BASIS    |
| PD9004       | FIP1L1 | cna | gain    | BASIS    |
| PD9702       | FIP1L1 | cna | gain    | BASIS    |
| TCGA-A2-A25B | GLI3   | cna | gain    | TCGA     |
| TCGA-AO-A0JL | GLI3   | cna | gain    | TCGA     |
| TCGA-BH-A0AW | GLI3   | cna | gain    | TCGA     |
| TCGA-BH-A0C0 | GLI3   | cna | hetloss | TCGA     |
| TCGA-C8-A12L | GLI3   | cna | gain    | TCGA     |
| TCGA-D8-A27M | GLI3   | cna | hetloss | TCGA     |
| TCGA-LL-A5YP | GLI3   | cna | gain    | TCGA     |
| MB-0346      | GLI3   | cna | hetloss | METABRIC |
| MB-5070      | GLI3   | cna | hetloss | METABRIC |
| MB-6098      | GLI3   | cna | hetloss | METABRIC |
| MB-0420      | GLI3   | cna | hetloss | METABRIC |
| PD11327      | GLI3   | cna | gain    | BASIS    |
| PD13296      | GLI3   | cna | gain    | BASIS    |
| PD23578      | GLI3   | cna | hetloss | BASIS    |
| PD24186      | GLI3   | cna | gain    | BASIS    |
| PD24202      | GLI3   | cna | hetloss | BASIS    |
| PD24206      | GLI3   | cna | gain    | BASIS    |
| PD24337      | GLI3   | cna | hetloss | BASIS    |
| PD3905       | GLI3   | cna | gain    | BASIS    |
| PD4006       | GLI3   | cna | gain    | BASIS    |
| PD4107       | GLI3   | cna | amp     | BASIS    |
| PD4826       | GLI3   | cna | gain    | BASIS    |
| PD5930       | GLI3   | cna | gain    | BASIS    |
| PD5945       | GLI3   | cna | amp     | BASIS    |
| PD6406       | GLI3   | cna | hetloss | BASIS    |
| PD6413       | GLI3   | cna | gain    | BASIS    |

|              |        |     |         |          |
|--------------|--------|-----|---------|----------|
| PD7067       | GLI3   | cna | gain    | BASIS    |
| PD7215       | GLI3   | cna | gain    | BASIS    |
| PD8621       | GLI3   | cna | gain    | BASIS    |
| PD9004       | GLI3   | cna | hetloss | BASIS    |
| PD9702       | GLI3   | cna | gain    | BASIS    |
| TCGA-AO-A0JL | HOXD11 | cna | gain    | TCGA     |
| TCGA-D8-A27M | HOXD11 | cna | gain    | TCGA     |
| TCGA-LL-A5YP | HOXD11 | cna | gain    | TCGA     |
| MB-2827      | HOXD11 | cna | hetloss | METABRIC |
| MB-5070      | HOXD11 | cna | hetloss | METABRIC |
| MB-5107      | HOXD11 | cna | hetloss | METABRIC |
| MB-6098      | HOXD11 | cna | hetloss | METABRIC |
| MB-6271      | HOXD11 | cna | hetloss | METABRIC |
| MB-7032      | HOXD11 | cna | gain    | METABRIC |
| MB-0420      | HOXD11 | cna | gain    | METABRIC |
| PD10014      | HOXD11 | cna | gain    | BASIS    |
| PD11327      | HOXD11 | cna | gain    | BASIS    |
| PD13299      | HOXD11 | cna | gain    | BASIS    |
| PD22355      | HOXD11 | cna | hetloss | BASIS    |
| PD24186      | HOXD11 | cna | gain    | BASIS    |
| PD24202      | HOXD11 | cna | gain    | BASIS    |
| PD24206      | HOXD11 | cna | gain    | BASIS    |
| PD3890       | HOXD11 | cna | hetloss | BASIS    |
| PD3905       | HOXD11 | cna | gain    | BASIS    |
| PD4006       | HOXD11 | cna | gain    | BASIS    |
| PD4107       | HOXD11 | cna | gain    | BASIS    |
| PD4967       | HOXD11 | cna | hetloss | BASIS    |
| PD5935       | HOXD11 | cna | gain    | BASIS    |
| PD5945       | HOXD11 | cna | amp     | BASIS    |
| PD5948       | HOXD11 | cna | gain    | BASIS    |
| PD6413       | HOXD11 | cna | hetloss | BASIS    |
| PD7067       | HOXD11 | cna | gain    | BASIS    |
| PD7215       | HOXD11 | cna | gain    | BASIS    |
| PD9004       | HOXD11 | cna | gain    | BASIS    |
| PD9585       | HOXD11 | cna | hetloss | BASIS    |
| PD9702       | HOXD11 | cna | gain    | BASIS    |
| TCGA-AO-A0JL | HOXD13 | cna | gain    | TCGA     |
| TCGA-D8-A27M | HOXD13 | cna | gain    | TCGA     |
| TCGA-LL-A5YP | HOXD13 | cna | gain    | TCGA     |
| MB-2827      | HOXD13 | cna | hetloss | METABRIC |
| MB-5070      | HOXD13 | cna | hetloss | METABRIC |
| MB-5107      | HOXD13 | cna | hetloss | METABRIC |
| MB-6098      | HOXD13 | cna | hetloss | METABRIC |
| MB-6271      | HOXD13 | cna | hetloss | METABRIC |
| MB-7032      | HOXD13 | cna | gain    | METABRIC |
| MB-0420      | HOXD13 | cna | gain    | METABRIC |
| PD10014      | HOXD13 | cna | gain    | BASIS    |

|              |          |     |         |          |
|--------------|----------|-----|---------|----------|
| PD11327      | HOXD13   | cna | gain    | BASIS    |
| PD13299      | HOXD13   | cna | gain    | BASIS    |
| PD22355      | HOXD13   | cna | hetloss | BASIS    |
| PD24186      | HOXD13   | cna | gain    | BASIS    |
| PD24202      | HOXD13   | cna | gain    | BASIS    |
| PD24206      | HOXD13   | cna | gain    | BASIS    |
| PD3890       | HOXD13   | cna | hetloss | BASIS    |
| PD3905       | HOXD13   | cna | gain    | BASIS    |
| PD4006       | HOXD13   | cna | gain    | BASIS    |
| PD4107       | HOXD13   | cna | gain    | BASIS    |
| PD4967       | HOXD13   | cna | hetloss | BASIS    |
| PD5935       | HOXD13   | cna | gain    | BASIS    |
| PD5945       | HOXD13   | cna | amp     | BASIS    |
| PD5948       | HOXD13   | cna | gain    | BASIS    |
| PD6413       | HOXD13   | cna | hetloss | BASIS    |
| PD7067       | HOXD13   | cna | gain    | BASIS    |
| PD7215       | HOXD13   | cna | gain    | BASIS    |
| PD9004       | HOXD13   | cna | gain    | BASIS    |
| PD9585       | HOXD13   | cna | hetloss | BASIS    |
| PD9702       | HOXD13   | cna | gain    | BASIS    |
| TCGA-A2-A25B | HSP90AB1 | cna | hetloss | TCGA     |
| TCGA-AO-A0JL | HSP90AB1 | cna | hetloss | TCGA     |
| TCGA-BH-A0AW | HSP90AB1 | cna | gain    | TCGA     |
| TCGA-BH-A0C0 | HSP90AB1 | cna | hetloss | TCGA     |
| TCGA-C8-A12L | HSP90AB1 | cna | gain    | TCGA     |
| TCGA-D8-A27M | HSP90AB1 | cna | gain    | TCGA     |
| MB-5070      | HSP90AB1 | cna | gain    | METABRIC |
| MB-6060      | HSP90AB1 | cna | hetloss | METABRIC |
| MB-7032      | HSP90AB1 | cna | gain    | METABRIC |
| MB-7038      | HSP90AB1 | cna | hetloss | METABRIC |
| PD11327      | HSP90AB1 | cna | amp     | BASIS    |
| PD13296      | HSP90AB1 | cna | gain    | BASIS    |
| PD13299      | HSP90AB1 | cna | gain    | BASIS    |
| PD22355      | HSP90AB1 | cna | gain    | BASIS    |
| PD23562      | HSP90AB1 | cna | gain    | BASIS    |
| PD24186      | HSP90AB1 | cna | gain    | BASIS    |
| PD24206      | HSP90AB1 | cna | gain    | BASIS    |
| PD3905       | HSP90AB1 | cna | amp     | BASIS    |
| PD4006       | HSP90AB1 | cna | gain    | BASIS    |
| PD4107       | HSP90AB1 | cna | gain    | BASIS    |
| PD4826       | HSP90AB1 | cna | gain    | BASIS    |
| PD5935       | HSP90AB1 | cna | gain    | BASIS    |
| PD5945       | HSP90AB1 | cna | amp     | BASIS    |
| PD5948       | HSP90AB1 | cna | gain    | BASIS    |
| PD7067       | HSP90AB1 | cna | amp     | BASIS    |
| PD7215       | HSP90AB1 | cna | gain    | BASIS    |
| PD8621       | HSP90AB1 | cna | gain    | BASIS    |

|              |          |     |         |          |
|--------------|----------|-----|---------|----------|
| PD8980       | HSP90AB1 | cna | hetloss | BASIS    |
| PD9004       | HSP90AB1 | cna | gain    | BASIS    |
| PD9585       | HSP90AB1 | cna | gain    | BASIS    |
| PD9702       | HSP90AB1 | cna | gain    | BASIS    |
| TCGA-AN-A0XU | IDH1     | cna | gain    | TCGA     |
| TCGA-AO-A0JL | IDH1     | cna | gain    | TCGA     |
| TCGA-BH-A0AW | IDH1     | cna | hetloss | TCGA     |
| TCGA-C8-A12L | IDH1     | cna | gain    | TCGA     |
| TCGA-D8-A27M | IDH1     | cna | amp     | TCGA     |
| TCGA-E9-A1NC | IDH1     | cna | hetloss | TCGA     |
| MB-2827      | IDH1     | cna | hetloss | METABRIC |
| MB-6098      | IDH1     | cna | hetloss | METABRIC |
| MB-6271      | IDH1     | cna | hetloss | METABRIC |
| MB-7032      | IDH1     | cna | gain    | METABRIC |
| MB-0420      | IDH1     | cna | gain    | METABRIC |
| PD10014      | IDH1     | cna | gain    | BASIS    |
| PD11327      | IDH1     | cna | gain    | BASIS    |
| PD13297      | IDH1     | cna | hetloss | BASIS    |
| PD23578      | IDH1     | cna | hetloss | BASIS    |
| PD24186      | IDH1     | cna | gain    | BASIS    |
| PD24206      | IDH1     | cna | gain    | BASIS    |
| PD3890       | IDH1     | cna | hetloss | BASIS    |
| PD3905       | IDH1     | cna | gain    | BASIS    |
| PD4006       | IDH1     | cna | gain    | BASIS    |
| PD4107       | IDH1     | cna | gain    | BASIS    |
| PD4967       | IDH1     | cna | hetloss | BASIS    |
| PD5935       | IDH1     | cna | gain    | BASIS    |
| PD5945       | IDH1     | cna | gain    | BASIS    |
| PD5948       | IDH1     | cna | gain    | BASIS    |
| PD6413       | IDH1     | cna | hetloss | BASIS    |
| PD6731       | IDH1     | cna | hetloss | BASIS    |
| PD7067       | IDH1     | cna | gain    | BASIS    |
| PD7215       | IDH1     | cna | gain    | BASIS    |
| PD9004       | IDH1     | cna | gain    | BASIS    |
| PD9585       | IDH1     | cna | hetloss | BASIS    |
| TCGA-A2-A25B | INHBA    | cna | gain    | TCGA     |
| TCGA-AO-A0JL | INHBA    | cna | gain    | TCGA     |
| TCGA-BH-A0AW | INHBA    | cna | gain    | TCGA     |
| TCGA-BH-A0C0 | INHBA    | cna | hetloss | TCGA     |
| TCGA-C8-A12L | INHBA    | cna | gain    | TCGA     |
| TCGA-D8-A27M | INHBA    | cna | hetloss | TCGA     |
| TCGA-LL-A5YP | INHBA    | cna | hetloss | TCGA     |
| MB-0346      | INHBA    | cna | hetloss | METABRIC |
| MB-5070      | INHBA    | cna | hetloss | METABRIC |
| MB-6098      | INHBA    | cna | hetloss | METABRIC |
| MB-0420      | INHBA    | cna | hetloss | METABRIC |
| PD11327      | INHBA    | cna | gain    | BASIS    |

|              |       |     |         |          |
|--------------|-------|-----|---------|----------|
| PD13296      | INHBA | cna | gain    | BASIS    |
| PD23578      | INHBA | cna | hetloss | BASIS    |
| PD24186      | INHBA | cna | gain    | BASIS    |
| PD24202      | INHBA | cna | hetloss | BASIS    |
| PD24206      | INHBA | cna | gain    | BASIS    |
| PD24337      | INHBA | cna | hetloss | BASIS    |
| PD3905       | INHBA | cna | gain    | BASIS    |
| PD4006       | INHBA | cna | gain    | BASIS    |
| PD4107       | INHBA | cna | amp     | BASIS    |
| PD4826       | INHBA | cna | gain    | BASIS    |
| PD5930       | INHBA | cna | gain    | BASIS    |
| PD5945       | INHBA | cna | amp     | BASIS    |
| PD6406       | INHBA | cna | hetloss | BASIS    |
| PD6413       | INHBA | cna | gain    | BASIS    |
| PD7067       | INHBA | cna | gain    | BASIS    |
| PD7215       | INHBA | cna | gain    | BASIS    |
| PD8621       | INHBA | cna | gain    | BASIS    |
| PD9004       | INHBA | cna | hetloss | BASIS    |
| PD9702       | INHBA | cna | gain    | BASIS    |
| TCGA-AN-A0XU | IRS1  | cna | hetloss | TCGA     |
| TCGA-AO-A0JL | IRS1  | cna | gain    | TCGA     |
| TCGA-BH-A0AW | IRS1  | cna | hetloss | TCGA     |
| TCGA-C8-A12L | IRS1  | cna | hetloss | TCGA     |
| TCGA-D8-A27M | IRS1  | cna | gain    | TCGA     |
| TCGA-E2-A1L7 | IRS1  | cna | hetloss | TCGA     |
| TCGA-E9-A1NC | IRS1  | cna | hetloss | TCGA     |
| MB-2827      | IRS1  | cna | hetloss | METABRIC |
| MB-6060      | IRS1  | cna | hetloss | METABRIC |
| MB-6098      | IRS1  | cna | hetloss | METABRIC |
| MB-6271      | IRS1  | cna | hetloss | METABRIC |
| MB-7038      | IRS1  | cna | gain    | METABRIC |
| PD10014      | IRS1  | cna | gain    | BASIS    |
| PD11327      | IRS1  | cna | gain    | BASIS    |
| PD13296      | IRS1  | cna | hetloss | BASIS    |
| PD13297      | IRS1  | cna | hetloss | BASIS    |
| PD23578      | IRS1  | cna | hetloss | BASIS    |
| PD24186      | IRS1  | cna | gain    | BASIS    |
| PD3890       | IRS1  | cna | hetloss | BASIS    |
| PD4005       | IRS1  | cna | hetloss | BASIS    |
| PD4967       | IRS1  | cna | hetloss | BASIS    |
| PD5935       | IRS1  | cna | gain    | BASIS    |
| PD5945       | IRS1  | cna | gain    | BASIS    |
| PD5948       | IRS1  | cna | gain    | BASIS    |
| PD6406       | IRS1  | cna | hetloss | BASIS    |
| PD6413       | IRS1  | cna | hetloss | BASIS    |
| PD6731       | IRS1  | cna | hetloss | BASIS    |
| PD7067       | IRS1  | cna | gain    | BASIS    |

|              |      |     |         |          |
|--------------|------|-----|---------|----------|
| PD7215       | IRS1 | cna | gain    | BASIS    |
| PD8980       | IRS1 | cna | hetloss | BASIS    |
| PD9585       | IRS1 | cna | hetloss | BASIS    |
| TCGA-AO-A0JL | KIT  | cna | gain    | TCGA     |
| TCGA-BH-A0C0 | KIT  | cna | gain    | TCGA     |
| TCGA-BH-A1FU | KIT  | cna | gain    | TCGA     |
| TCGA-C8-A12L | KIT  | cna | gain    | TCGA     |
| TCGA-D8-A27M | KIT  | cna | gain    | TCGA     |
| TCGA-E9-A1NC | KIT  | cna | hetloss | TCGA     |
| TCGA-LL-A5YP | KIT  | cna | gain    | TCGA     |
| MB-5465      | KIT  | cna | gain    | METABRIC |
| MB-6060      | KIT  | cna | gain    | METABRIC |
| MB-6098      | KIT  | cna | amp     | METABRIC |
| MB-7038      | KIT  | cna | gain    | METABRIC |
| MB-0420      | KIT  | cna | hetloss | METABRIC |
| PD11327      | KIT  | cna | amp     | BASIS    |
| PD11742      | KIT  | cna | hetloss | BASIS    |
| PD13296      | KIT  | cna | hetloss | BASIS    |
| PD13297      | KIT  | cna | hetloss | BASIS    |
| PD22355      | KIT  | cna | hetloss | BASIS    |
| PD23574      | KIT  | cna | gain    | BASIS    |
| PD24206      | KIT  | cna | gain    | BASIS    |
| PD3890       | KIT  | cna | gain    | BASIS    |
| PD3905       | KIT  | cna | gain    | BASIS    |
| PD4006       | KIT  | cna | gain    | BASIS    |
| PD4107       | KIT  | cna | gain    | BASIS    |
| PD4826       | KIT  | cna | gain    | BASIS    |
| PD5935       | KIT  | cna | gain    | BASIS    |
| PD5945       | KIT  | cna | gain    | BASIS    |
| PD5948       | KIT  | cna | gain    | BASIS    |
| PD7215       | KIT  | cna | amp     | BASIS    |
| PD8980       | KIT  | cna | hetloss | BASIS    |
| PD9004       | KIT  | cna | gain    | BASIS    |
| PD9702       | KIT  | cna | gain    | BASIS    |
| TCGA-A2-A25B | KLF4 | cna | gain    | TCGA     |
| TCGA-AN-A0XU | KLF4 | cna | hetloss | TCGA     |
| TCGA-AO-A0JL | KLF4 | cna | hetloss | TCGA     |
| TCGA-BH-A1FU | KLF4 | cna | hetloss | TCGA     |
| TCGA-C8-A12L | KLF4 | cna | hetloss | TCGA     |
| TCGA-E2-A1L7 | KLF4 | cna | hetloss | TCGA     |
| TCGA-E9-A1NC | KLF4 | cna | hetloss | TCGA     |
| TCGA-LL-A5YP | KLF4 | cna | hetloss | TCGA     |
| MB-0346      | KLF4 | cna | hetloss | METABRIC |
| MB-5070      | KLF4 | cna | hetloss | METABRIC |
| MB-5107      | KLF4 | cna | hetloss | METABRIC |
| MB-6098      | KLF4 | cna | hetloss | METABRIC |
| MB-7038      | KLF4 | cna | hetloss | METABRIC |



|              |          |     |         |          |
|--------------|----------|-----|---------|----------|
| MB-0420      | KLF4     | cna | hetloss | METABRIC |
| PD11327      | KLF4     | cna | hetloss | BASIS    |
| PD13296      | KLF4     | cna | hetloss | BASIS    |
| PD23562      | KLF4     | cna | gain    | BASIS    |
| PD23578      | KLF4     | cna | hetloss | BASIS    |
| PD24186      | KLF4     | cna | amp     | BASIS    |
| PD24202      | KLF4     | cna | hetloss | BASIS    |
| PD24206      | KLF4     | cna | gain    | BASIS    |
| PD3905       | KLF4     | cna | gain    | BASIS    |
| PD4005       | KLF4     | cna | hetloss | BASIS    |
| PD4006       | KLF4     | cna | gain    | BASIS    |
| PD4107       | KLF4     | cna | hetloss | BASIS    |
| PD5945       | KLF4     | cna | amp     | BASIS    |
| PD6406       | KLF4     | cna | hetloss | BASIS    |
| PD6731       | KLF4     | cna | hetloss | BASIS    |
| PD7215       | KLF4     | cna | gain    | BASIS    |
| PD8621       | KLF4     | cna | gain    | BASIS    |
| PD9585       | KLF4     | cna | hetloss | BASIS    |
| TCGA-AN-A0XU | MAPK8IP1 | cna | hetloss | TCGA     |
| TCGA-AO-A0JL | MAPK8IP1 | cna | hetloss | TCGA     |
| TCGA-BH-A0C0 | MAPK8IP1 | cna | gain    | TCGA     |
| TCGA-C8-A12L | MAPK8IP1 | cna | hetloss | TCGA     |
| TCGA-LL-A5YP | MAPK8IP1 | cna | gain    | TCGA     |
| MB-0346      | MAPK8IP1 | cna | hetloss | METABRIC |
| MB-6098      | MAPK8IP1 | cna | hetloss | METABRIC |
| MB-6271      | MAPK8IP1 | cna | gain    | METABRIC |
| MB-7048      | MAPK8IP1 | cna | hetloss | METABRIC |
| PD10014      | MAPK8IP1 | cna | hetloss | BASIS    |
| PD11327      | MAPK8IP1 | cna | homdel  | BASIS    |
| PD13296      | MAPK8IP1 | cna | hetloss | BASIS    |
| PD13771      | MAPK8IP1 | cna | hetloss | BASIS    |
| PD23574      | MAPK8IP1 | cna | gain    | BASIS    |
| PD24186      | MAPK8IP1 | cna | gain    | BASIS    |
| PD24206      | MAPK8IP1 | cna | gain    | BASIS    |
| PD3905       | MAPK8IP1 | cna | gain    | BASIS    |
| PD4005       | MAPK8IP1 | cna | gain    | BASIS    |
| PD4006       | MAPK8IP1 | cna | gain    | BASIS    |
| PD4107       | MAPK8IP1 | cna | gain    | BASIS    |
| PD4826       | MAPK8IP1 | cna | gain    | BASIS    |
| PD5935       | MAPK8IP1 | cna | gain    | BASIS    |
| PD5945       | MAPK8IP1 | cna | gain    | BASIS    |
| PD5948       | MAPK8IP1 | cna | gain    | BASIS    |
| PD6406       | MAPK8IP1 | cna | hetloss | BASIS    |
| PD6413       | MAPK8IP1 | cna | hetloss | BASIS    |
| PD7215       | MAPK8IP1 | cna | gain    | BASIS    |
| PD8621       | MAPK8IP1 | cna | gain    | BASIS    |
| PD8980       | MAPK8IP1 | cna | hetloss | BASIS    |

|              |          |     |         |          |
|--------------|----------|-----|---------|----------|
| PD9585       | MAPK8IP1 | cna | hetloss | BASIS    |
| PD9702       | MAPK8IP1 | cna | gain    | BASIS    |
| TCGA-AN-A0XU | MDC1     | cna | gain    | TCGA     |
| TCGA-AO-A0JL | MDC1     | cna | gain    | TCGA     |
| TCGA-BH-A0AW | MDC1     | cna | gain    | TCGA     |
| TCGA-BH-A0C0 | MDC1     | cna | hetloss | TCGA     |
| TCGA-BH-A18R | MDC1     | cna | gain    | TCGA     |
| TCGA-C8-A12L | MDC1     | cna | hetloss | TCGA     |
| TCGA-E9-A1NC | MDC1     | cna | amp     | TCGA     |
| MB-5465      | MDC1     | cna | gain    | METABRIC |
| MB-6098      | MDC1     | cna | hetloss | METABRIC |
| MB-7032      | MDC1     | cna | gain    | METABRIC |
| PD11327      | MDC1     | cna | hetloss | BASIS    |
| PD13296      | MDC1     | cna | gain    | BASIS    |
| PD13299      | MDC1     | cna | gain    | BASIS    |
| PD23562      | MDC1     | cna | gain    | BASIS    |
| PD24186      | MDC1     | cna | gain    | BASIS    |
| PD24202      | MDC1     | cna | gain    | BASIS    |
| PD24206      | MDC1     | cna | gain    | BASIS    |
| PD3905       | MDC1     | cna | gain    | BASIS    |
| PD4006       | MDC1     | cna | gain    | BASIS    |
| PD4107       | MDC1     | cna | gain    | BASIS    |
| PD4826       | MDC1     | cna | gain    | BASIS    |
| PD5935       | MDC1     | cna | gain    | BASIS    |
| PD5945       | MDC1     | cna | amp     | BASIS    |
| PD5948       | MDC1     | cna | gain    | BASIS    |
| PD6731       | MDC1     | cna | hetloss | BASIS    |
| PD7067       | MDC1     | cna | amp     | BASIS    |
| PD7215       | MDC1     | cna | gain    | BASIS    |
| PD8621       | MDC1     | cna | amp     | BASIS    |
| PD9004       | MDC1     | cna | gain    | BASIS    |
| PD9585       | MDC1     | cna | gain    | BASIS    |
| PD9702       | MDC1     | cna | gain    | BASIS    |
| TCGA-A2-A25B | MLLT3    | cna | hetloss | TCGA     |
| TCGA-AO-A0JL | MLLT3    | cna | gain    | TCGA     |
| TCGA-BH-A0AW | MLLT3    | cna | hetloss | TCGA     |
| TCGA-BH-A1FU | MLLT3    | cna | hetloss | TCGA     |
| TCGA-C8-A12L | MLLT3    | cna | hetloss | TCGA     |
| TCGA-E9-A1NC | MLLT3    | cna | hetloss | TCGA     |
| MB-0346      | MLLT3    | cna | hetloss | METABRIC |
| MB-5070      | MLLT3    | cna | hetloss | METABRIC |
| MB-6098      | MLLT3    | cna | hetloss | METABRIC |
| MB-0420      | MLLT3    | cna | hetloss | METABRIC |
| MTS-T0064    | MLLT3    | cna | amp     | METABRIC |
| PD13296      | MLLT3    | cna | hetloss | BASIS    |
| PD13297      | MLLT3    | cna | hetloss | BASIS    |
| PD13299      | MLLT3    | cna | amp     | BASIS    |

|              |       |     |         |          |
|--------------|-------|-----|---------|----------|
| PD22355      | MLLT3 | cna | gain    | BASIS    |
| PD23574      | MLLT3 | cna | amp     | BASIS    |
| PD24202      | MLLT3 | cna | hetloss | BASIS    |
| PD24337      | MLLT3 | cna | hetloss | BASIS    |
| PD3905       | MLLT3 | cna | gain    | BASIS    |
| PD4005       | MLLT3 | cna | hetloss | BASIS    |
| PD4006       | MLLT3 | cna | gain    | BASIS    |
| PD4826       | MLLT3 | cna | hetloss | BASIS    |
| PD5945       | MLLT3 | cna | amp     | BASIS    |
| PD6406       | MLLT3 | cna | homdel  | BASIS    |
| PD6413       | MLLT3 | cna | gain    | BASIS    |
| PD7067       | MLLT3 | cna | homdel  | BASIS    |
| PD8621       | MLLT3 | cna | gain    | BASIS    |
| PD8980       | MLLT3 | cna | homdel  | BASIS    |
| PD9004       | MLLT3 | cna | gain    | BASIS    |
| PD9585       | MLLT3 | cna | hetloss | BASIS    |
| PD9702       | MLLT3 | cna | gain    | BASIS    |
| TCGA-A2-A25B | MN1   | cna | hetloss | TCGA     |
| TCGA-BH-A0C0 | MN1   | cna | gain    | TCGA     |
| TCGA-BH-A1FU | MN1   | cna | gain    | TCGA     |
| TCGA-C8-A12L | MN1   | cna | gain    | TCGA     |
| TCGA-E9-A1NC | MN1   | cna | gain    | TCGA     |
| TCGA-LL-A5YP | MN1   | cna | gain    | TCGA     |
| MB-0346      | MN1   | cna | gain    | METABRIC |
| MB-6060      | MN1   | cna | gain    | METABRIC |
| PD11327      | MN1   | cna | gain    | BASIS    |
| PD11742      | MN1   | cna | hetloss | BASIS    |
| PD13296      | MN1   | cna | gain    | BASIS    |
| PD13297      | MN1   | cna | gain    | BASIS    |
| PD14442      | MN1   | cna | hetloss | BASIS    |
| PD23562      | MN1   | cna | gain    | BASIS    |
| PD23574      | MN1   | cna | gain    | BASIS    |
| PD24206      | MN1   | cna | hetloss | BASIS    |
| PD3905       | MN1   | cna | gain    | BASIS    |
| PD4006       | MN1   | cna | gain    | BASIS    |
| PD4107       | MN1   | cna | gain    | BASIS    |
| PD4826       | MN1   | cna | gain    | BASIS    |
| PD4967       | MN1   | cna | hetloss | BASIS    |
| PD5930       | MN1   | cna | gain    | BASIS    |
| PD5935       | MN1   | cna | gain    | BASIS    |
| PD5945       | MN1   | cna | amp     | BASIS    |
| PD5948       | MN1   | cna | gain    | BASIS    |
| PD6731       | MN1   | cna | hetloss | BASIS    |
| PD7067       | MN1   | cna | gain    | BASIS    |
| PD7215       | MN1   | cna | gain    | BASIS    |
| PD8621       | MN1   | cna | gain    | BASIS    |
| PD9004       | MN1   | cna | gain    | BASIS    |

|              |       |     |         |          |
|--------------|-------|-----|---------|----------|
| PD9702       | MN1   | cna | gain    | BASIS    |
| TCGA-A2-A25B | MUTYH | cna | gain    | TCGA     |
| TCGA-AN-A0XU | MUTYH | cna | gain    | TCGA     |
| TCGA-AO-A0JL | MUTYH | cna | hetloss | TCGA     |
| TCGA-BH-A0AW | MUTYH | cna | gain    | TCGA     |
| TCGA-BH-A0C0 | MUTYH | cna | gain    | TCGA     |
| TCGA-BH-A1FU | MUTYH | cna | gain    | TCGA     |
| TCGA-D8-A27M | MUTYH | cna | gain    | TCGA     |
| TCGA-E2-A1L7 | MUTYH | cna | gain    | TCGA     |
| TCGA-LL-A5YP | MUTYH | cna | hetloss | TCGA     |
| MB-0346      | MUTYH | cna | hetloss | METABRIC |
| MB-2827      | MUTYH | cna | hetloss | METABRIC |
| MB-6060      | MUTYH | cna | hetloss | METABRIC |
| MB-6098      | MUTYH | cna | gain    | METABRIC |
| MB-7038      | MUTYH | cna | gain    | METABRIC |
| MB-0420      | MUTYH | cna | hetloss | METABRIC |
| PD13296      | MUTYH | cna | gain    | BASIS    |
| PD13299      | MUTYH | cna | gain    | BASIS    |
| PD24186      | MUTYH | cna | amp     | BASIS    |
| PD3905       | MUTYH | cna | gain    | BASIS    |
| PD4006       | MUTYH | cna | gain    | BASIS    |
| PD4107       | MUTYH | cna | gain    | BASIS    |
| PD4826       | MUTYH | cna | gain    | BASIS    |
| PD5935       | MUTYH | cna | gain    | BASIS    |
| PD5945       | MUTYH | cna | amp     | BASIS    |
| PD5948       | MUTYH | cna | gain    | BASIS    |
| PD7067       | MUTYH | cna | gain    | BASIS    |
| PD7215       | MUTYH | cna | gain    | BASIS    |
| PD8621       | MUTYH | cna | gain    | BASIS    |
| PD8980       | MUTYH | cna | gain    | BASIS    |
| PD9004       | MUTYH | cna | gain    | BASIS    |
| PD9702       | MUTYH | cna | gain    | BASIS    |
| TCGA-A2-A25B | NACA  | cna | gain    | TCGA     |
| TCGA-AO-A0JL | NACA  | cna | hetloss | TCGA     |
| TCGA-BH-A18R | NACA  | cna | gain    | TCGA     |
| TCGA-BH-A1FU | NACA  | cna | hetloss | TCGA     |
| TCGA-C8-A12L | NACA  | cna | gain    | TCGA     |
| TCGA-D8-A27M | NACA  | cna | hetloss | TCGA     |
| TCGA-E2-A1L7 | NACA  | cna | hetloss | TCGA     |
| TCGA-LL-A5YP | NACA  | cna | hetloss | TCGA     |
| MB-0346      | NACA  | cna | gain    | METABRIC |
| MB-2827      | NACA  | cna | hetloss | METABRIC |
| MB-6098      | NACA  | cna | hetloss | METABRIC |
| MB-7038      | NACA  | cna | hetloss | METABRIC |
| MB-0420      | NACA  | cna | hetloss | METABRIC |
| PD11327      | NACA  | cna | homdel  | BASIS    |
| PD13296      | NACA  | cna | hetloss | BASIS    |

|              |       |     |         |          |
|--------------|-------|-----|---------|----------|
| PD13297      | NACA  | cna | hetloss | BASIS    |
| PD13771      | NACA  | cna | gain    | BASIS    |
| PD24186      | NACA  | cna | gain    | BASIS    |
| PD24202      | NACA  | cna | hetloss | BASIS    |
| PD24206      | NACA  | cna | gain    | BASIS    |
| PD24337      | NACA  | cna | hetloss | BASIS    |
| PD3890       | NACA  | cna | hetloss | BASIS    |
| PD3905       | NACA  | cna | gain    | BASIS    |
| PD4826       | NACA  | cna | gain    | BASIS    |
| PD5945       | NACA  | cna | gain    | BASIS    |
| PD6413       | NACA  | cna | hetloss | BASIS    |
| PD6731       | NACA  | cna | hetloss | BASIS    |
| PD7067       | NACA  | cna | gain    | BASIS    |
| PD8621       | NACA  | cna | hetloss | BASIS    |
| PD9585       | NACA  | cna | hetloss | BASIS    |
| PD9702       | NACA  | cna | gain    | BASIS    |
| TCGA-AN-A0XU | PALB2 | cna | gain    | TCGA     |
| TCGA-AO-A0JL | PALB2 | cna | gain    | TCGA     |
| TCGA-BH-A0AW | PALB2 | cna | gain    | TCGA     |
| TCGA-BH-A0C0 | PALB2 | cna | gain    | TCGA     |
| TCGA-C8-A12L | PALB2 | cna | gain    | TCGA     |
| TCGA-E2-A1L7 | PALB2 | cna | hetloss | TCGA     |
| TCGA-LL-A5YP | PALB2 | cna | gain    | TCGA     |
| MB-0346      | PALB2 | cna | gain    | METABRIC |
| MB-6271      | PALB2 | cna | gain    | METABRIC |
| MB-7032      | PALB2 | cna | gain    | METABRIC |
| MB-7038      | PALB2 | cna | hetloss | METABRIC |
| MB-0420      | PALB2 | cna | hetloss | METABRIC |
| PD10014      | PALB2 | cna | hetloss | BASIS    |
| PD11327      | PALB2 | cna | hetloss | BASIS    |
| PD11742      | PALB2 | cna | gain    | BASIS    |
| PD13299      | PALB2 | cna | gain    | BASIS    |
| PD24186      | PALB2 | cna | gain    | BASIS    |
| PD24202      | PALB2 | cna | hetloss | BASIS    |
| PD3905       | PALB2 | cna | gain    | BASIS    |
| PD4006       | PALB2 | cna | gain    | BASIS    |
| PD4107       | PALB2 | cna | gain    | BASIS    |
| PD4826       | PALB2 | cna | gain    | BASIS    |
| PD5930       | PALB2 | cna | gain    | BASIS    |
| PD5935       | PALB2 | cna | gain    | BASIS    |
| PD5945       | PALB2 | cna | amp     | BASIS    |
| PD5948       | PALB2 | cna | gain    | BASIS    |
| PD7067       | PALB2 | cna | gain    | BASIS    |
| PD7215       | PALB2 | cna | amp     | BASIS    |
| PD8621       | PALB2 | cna | gain    | BASIS    |
| PD8980       | PALB2 | cna | gain    | BASIS    |
| PD9004       | PALB2 | cna | gain    | BASIS    |

|              |        |     |         |          |
|--------------|--------|-----|---------|----------|
| TCGA-AN-A0XU | PAX3   | cna | hetloss | TCGA     |
| TCGA-AO-A0JL | PAX3   | cna | gain    | TCGA     |
| TCGA-BH-A0AW | PAX3   | cna | hetloss | TCGA     |
| TCGA-C8-A12L | PAX3   | cna | hetloss | TCGA     |
| TCGA-D8-A27M | PAX3   | cna | gain    | TCGA     |
| TCGA-E2-A1L7 | PAX3   | cna | hetloss | TCGA     |
| TCGA-E9-A1NC | PAX3   | cna | hetloss | TCGA     |
| MB-2827      | PAX3   | cna | hetloss | METABRIC |
| MB-6060      | PAX3   | cna | hetloss | METABRIC |
| MB-6098      | PAX3   | cna | hetloss | METABRIC |
| MB-6271      | PAX3   | cna | hetloss | METABRIC |
| MB-7038      | PAX3   | cna | gain    | METABRIC |
| PD10014      | PAX3   | cna | gain    | BASIS    |
| PD11327      | PAX3   | cna | gain    | BASIS    |
| PD13296      | PAX3   | cna | hetloss | BASIS    |
| PD13297      | PAX3   | cna | hetloss | BASIS    |
| PD23578      | PAX3   | cna | hetloss | BASIS    |
| PD24186      | PAX3   | cna | gain    | BASIS    |
| PD24337      | PAX3   | cna | hetloss | BASIS    |
| PD3890       | PAX3   | cna | hetloss | BASIS    |
| PD3905       | PAX3   | cna | gain    | BASIS    |
| PD4967       | PAX3   | cna | hetloss | BASIS    |
| PD5935       | PAX3   | cna | gain    | BASIS    |
| PD5945       | PAX3   | cna | gain    | BASIS    |
| PD5948       | PAX3   | cna | gain    | BASIS    |
| PD6413       | PAX3   | cna | hetloss | BASIS    |
| PD6731       | PAX3   | cna | hetloss | BASIS    |
| PD7067       | PAX3   | cna | gain    | BASIS    |
| PD7215       | PAX3   | cna | gain    | BASIS    |
| PD8980       | PAX3   | cna | hetloss | BASIS    |
| PD9585       | PAX3   | cna | hetloss | BASIS    |
| TCGA-AN-A0XU | PDGFRA | cna | gain    | TCGA     |
| TCGA-AO-A0JL | PDGFRA | cna | gain    | TCGA     |
| TCGA-BH-A0C0 | PDGFRA | cna | gain    | TCGA     |
| TCGA-BH-A1FU | PDGFRA | cna | gain    | TCGA     |
| TCGA-C8-A12L | PDGFRA | cna | gain    | TCGA     |
| TCGA-D8-A27M | PDGFRA | cna | gain    | TCGA     |
| TCGA-E9-A1NC | PDGFRA | cna | hetloss | TCGA     |
| TCGA-LL-A5YP | PDGFRA | cna | amp     | TCGA     |
| MB-5465      | PDGFRA | cna | hetloss | METABRIC |
| MB-6060      | PDGFRA | cna | gain    | METABRIC |
| MB-6098      | PDGFRA | cna | amp     | METABRIC |
| MB-7038      | PDGFRA | cna | gain    | METABRIC |
| MB-0420      | PDGFRA | cna | hetloss | METABRIC |
| PD11327      | PDGFRA | cna | amp     | BASIS    |
| PD13296      | PDGFRA | cna | hetloss | BASIS    |
| PD13297      | PDGFRA | cna | hetloss | BASIS    |

|              |        |     |         |          |
|--------------|--------|-----|---------|----------|
| PD22355      | PDGFRA | cna | hetloss | BASIS    |
| PD23574      | PDGFRA | cna | gain    | BASIS    |
| PD24206      | PDGFRA | cna | gain    | BASIS    |
| PD3890       | PDGFRA | cna | gain    | BASIS    |
| PD3905       | PDGFRA | cna | gain    | BASIS    |
| PD4006       | PDGFRA | cna | gain    | BASIS    |
| PD4107       | PDGFRA | cna | gain    | BASIS    |
| PD4826       | PDGFRA | cna | gain    | BASIS    |
| PD5935       | PDGFRA | cna | gain    | BASIS    |
| PD5945       | PDGFRA | cna | gain    | BASIS    |
| PD5948       | PDGFRA | cna | gain    | BASIS    |
| PD7215       | PDGFRA | cna | amp     | BASIS    |
| PD8980       | PDGFRA | cna | hetloss | BASIS    |
| PD9004       | PDGFRA | cna | gain    | BASIS    |
| PD9702       | PDGFRA | cna | gain    | BASIS    |
| TCGA-A2-A25B | PIK3R3 | cna | gain    | TCGA     |
| TCGA-AN-A0XU | PIK3R3 | cna | gain    | TCGA     |
| TCGA-AO-A0JL | PIK3R3 | cna | hetloss | TCGA     |
| TCGA-BH-A0AW | PIK3R3 | cna | gain    | TCGA     |
| TCGA-BH-A0C0 | PIK3R3 | cna | gain    | TCGA     |
| TCGA-BH-A1FU | PIK3R3 | cna | gain    | TCGA     |
| TCGA-D8-A27M | PIK3R3 | cna | gain    | TCGA     |
| TCGA-E2-A1L7 | PIK3R3 | cna | gain    | TCGA     |
| TCGA-LL-A5YP | PIK3R3 | cna | hetloss | TCGA     |
| MB-0346      | PIK3R3 | cna | hetloss | METABRIC |
| MB-2827      | PIK3R3 | cna | hetloss | METABRIC |
| MB-6060      | PIK3R3 | cna | hetloss | METABRIC |
| MB-6098      | PIK3R3 | cna | gain    | METABRIC |
| MB-7038      | PIK3R3 | cna | gain    | METABRIC |
| MB-0420      | PIK3R3 | cna | hetloss | METABRIC |
| PD13296      | PIK3R3 | cna | gain    | BASIS    |
| PD13299      | PIK3R3 | cna | gain    | BASIS    |
| PD24186      | PIK3R3 | cna | amp     | BASIS    |
| PD24206      | PIK3R3 | cna | gain    | BASIS    |
| PD3905       | PIK3R3 | cna | gain    | BASIS    |
| PD4006       | PIK3R3 | cna | gain    | BASIS    |
| PD4107       | PIK3R3 | cna | gain    | BASIS    |
| PD4826       | PIK3R3 | cna | gain    | BASIS    |
| PD5935       | PIK3R3 | cna | gain    | BASIS    |
| PD5945       | PIK3R3 | cna | amp     | BASIS    |
| PD5948       | PIK3R3 | cna | gain    | BASIS    |
| PD7067       | PIK3R3 | cna | gain    | BASIS    |
| PD7215       | PIK3R3 | cna | gain    | BASIS    |
| PD8621       | PIK3R3 | cna | gain    | BASIS    |
| PD9004       | PIK3R3 | cna | gain    | BASIS    |
| PD9702       | PIK3R3 | cna | gain    | BASIS    |
| TCGA-A2-A25B | PIM1   | cna | hetloss | TCGA     |

|              |       |     |         |          |
|--------------|-------|-----|---------|----------|
| TCGA-AN-A0XU | PIM1  | cna | hetloss | TCGA     |
| TCGA-AO-A0JL | PIM1  | cna | gain    | TCGA     |
| TCGA-BH-A0AW | PIM1  | cna | gain    | TCGA     |
| TCGA-BH-A0C0 | PIM1  | cna | hetloss | TCGA     |
| TCGA-C8-A12L | PIM1  | cna | hetloss | TCGA     |
| TCGA-E2-A1L7 | PIM1  | cna | hetloss | TCGA     |
| TCGA-E9-A1NC | PIM1  | cna | amp     | TCGA     |
| MB-6098      | PIM1  | cna | gain    | METABRIC |
| MB-7032      | PIM1  | cna | gain    | METABRIC |
| PD11327      | PIM1  | cna | hetloss | BASIS    |
| PD13299      | PIM1  | cna | gain    | BASIS    |
| PD22355      | PIM1  | cna | gain    | BASIS    |
| PD23562      | PIM1  | cna | gain    | BASIS    |
| PD24186      | PIM1  | cna | gain    | BASIS    |
| PD24206      | PIM1  | cna | gain    | BASIS    |
| PD24337      | PIM1  | cna | gain    | BASIS    |
| PD3905       | PIM1  | cna | gain    | BASIS    |
| PD4006       | PIM1  | cna | gain    | BASIS    |
| PD4107       | PIM1  | cna | gain    | BASIS    |
| PD4826       | PIM1  | cna | gain    | BASIS    |
| PD5935       | PIM1  | cna | gain    | BASIS    |
| PD5945       | PIM1  | cna | amp     | BASIS    |
| PD5948       | PIM1  | cna | gain    | BASIS    |
| PD7067       | PIM1  | cna | amp     | BASIS    |
| PD7215       | PIM1  | cna | gain    | BASIS    |
| PD8621       | PIM1  | cna | gain    | BASIS    |
| PD8980       | PIM1  | cna | homdel  | BASIS    |
| PD9004       | PIM1  | cna | gain    | BASIS    |
| PD9585       | PIM1  | cna | gain    | BASIS    |
| PD9702       | PIM1  | cna | gain    | BASIS    |
| TCGA-A2-A25B | PNRC1 | cna | hetloss | TCGA     |
| TCGA-AN-A0XU | PNRC1 | cna | amp     | TCGA     |
| TCGA-AO-A0JL | PNRC1 | cna | hetloss | TCGA     |
| TCGA-C8-A12L | PNRC1 | cna | gain    | TCGA     |
| MB-2827      | PNRC1 | cna | amp     | METABRIC |
| MB-5107      | PNRC1 | cna | hetloss | METABRIC |
| MB-6098      | PNRC1 | cna | hetloss | METABRIC |
| MB-7032      | PNRC1 | cna | hetloss | METABRIC |
| MB-7038      | PNRC1 | cna | gain    | METABRIC |
| MB-7048      | PNRC1 | cna | hetloss | METABRIC |
| PD11327      | PNRC1 | cna | hetloss | BASIS    |
| PD13299      | PNRC1 | cna | gain    | BASIS    |
| PD13771      | PNRC1 | cna | hetloss | BASIS    |
| PD23562      | PNRC1 | cna | gain    | BASIS    |
| PD23574      | PNRC1 | cna | gain    | BASIS    |
| PD23578      | PNRC1 | cna | gain    | BASIS    |
| PD24186      | PNRC1 | cna | gain    | BASIS    |



|              |        |     |         |          |
|--------------|--------|-----|---------|----------|
| PD24206      | PNRC1  | cna | gain    | BASIS    |
| PD24337      | PNRC1  | cna | hetloss | BASIS    |
| PD3905       | PNRC1  | cna | gain    | BASIS    |
| PD4006       | PNRC1  | cna | gain    | BASIS    |
| PD4826       | PNRC1  | cna | gain    | BASIS    |
| PD5935       | PNRC1  | cna | gain    | BASIS    |
| PD5945       | PNRC1  | cna | gain    | BASIS    |
| PD6731       | PNRC1  | cna | hetloss | BASIS    |
| PD7215       | PNRC1  | cna | gain    | BASIS    |
| PD8621       | PNRC1  | cna | gain    | BASIS    |
| PD8980       | PNRC1  | cna | gain    | BASIS    |
| PD9004       | PNRC1  | cna | gain    | BASIS    |
| PD9585       | PNRC1  | cna | hetloss | BASIS    |
| PD9702       | PNRC1  | cna | gain    | BASIS    |
| TCGA-AN-A0XU | POU5F1 | cna | gain    | TCGA     |
| TCGA-AO-A0JL | POU5F1 | cna | gain    | TCGA     |
| TCGA-BH-A0AW | POU5F1 | cna | gain    | TCGA     |
| TCGA-BH-A0C0 | POU5F1 | cna | hetloss | TCGA     |
| TCGA-BH-A18R | POU5F1 | cna | gain    | TCGA     |
| TCGA-C8-A12L | POU5F1 | cna | hetloss | TCGA     |
| TCGA-E2-A1L7 | POU5F1 | cna | hetloss | TCGA     |
| TCGA-E9-A1NC | POU5F1 | cna | amp     | TCGA     |
| MB-6098      | POU5F1 | cna | hetloss | METABRIC |
| MB-7032      | POU5F1 | cna | gain    | METABRIC |
| PD11327      | POU5F1 | cna | hetloss | BASIS    |
| PD13296      | POU5F1 | cna | gain    | BASIS    |
| PD13299      | POU5F1 | cna | gain    | BASIS    |
| PD23562      | POU5F1 | cna | gain    | BASIS    |
| PD24186      | POU5F1 | cna | gain    | BASIS    |
| PD24202      | POU5F1 | cna | gain    | BASIS    |
| PD24206      | POU5F1 | cna | gain    | BASIS    |
| PD3905       | POU5F1 | cna | gain    | BASIS    |
| PD4006       | POU5F1 | cna | gain    | BASIS    |
| PD4107       | POU5F1 | cna | gain    | BASIS    |
| PD4826       | POU5F1 | cna | gain    | BASIS    |
| PD5935       | POU5F1 | cna | gain    | BASIS    |
| PD5945       | POU5F1 | cna | amp     | BASIS    |
| PD5948       | POU5F1 | cna | gain    | BASIS    |
| PD6731       | POU5F1 | cna | hetloss | BASIS    |
| PD7067       | POU5F1 | cna | amp     | BASIS    |
| PD7215       | POU5F1 | cna | gain    | BASIS    |
| PD8621       | POU5F1 | cna | amp     | BASIS    |
| PD9004       | POU5F1 | cna | gain    | BASIS    |
| PD9585       | POU5F1 | cna | gain    | BASIS    |
| PD9702       | POU5F1 | cna | amp     | BASIS    |
| TCGA-A2-A25B | RAD54L | cna | gain    | TCGA     |
| TCGA-AN-A0XU | RAD54L | cna | gain    | TCGA     |

|              |          |     |         |          |
|--------------|----------|-----|---------|----------|
| TCGA-AO-A0JL | RAD54L   | cna | hetloss | TCGA     |
| TCGA-BH-A0AW | RAD54L   | cna | gain    | TCGA     |
| TCGA-BH-A0C0 | RAD54L   | cna | gain    | TCGA     |
| TCGA-BH-A1FU | RAD54L   | cna | gain    | TCGA     |
| TCGA-D8-A27M | RAD54L   | cna | gain    | TCGA     |
| TCGA-E2-A1L7 | RAD54L   | cna | gain    | TCGA     |
| TCGA-LL-A5YP | RAD54L   | cna | hetloss | TCGA     |
| MB-0346      | RAD54L   | cna | hetloss | METABRIC |
| MB-2827      | RAD54L   | cna | hetloss | METABRIC |
| MB-6060      | RAD54L   | cna | hetloss | METABRIC |
| MB-6098      | RAD54L   | cna | gain    | METABRIC |
| MB-7038      | RAD54L   | cna | gain    | METABRIC |
| MB-0420      | RAD54L   | cna | hetloss | METABRIC |
| PD13296      | RAD54L   | cna | gain    | BASIS    |
| PD13299      | RAD54L   | cna | gain    | BASIS    |
| PD24186      | RAD54L   | cna | amp     | BASIS    |
| PD24206      | RAD54L   | cna | gain    | BASIS    |
| PD3905       | RAD54L   | cna | gain    | BASIS    |
| PD4006       | RAD54L   | cna | gain    | BASIS    |
| PD4107       | RAD54L   | cna | gain    | BASIS    |
| PD4826       | RAD54L   | cna | gain    | BASIS    |
| PD5935       | RAD54L   | cna | gain    | BASIS    |
| PD5945       | RAD54L   | cna | amp     | BASIS    |
| PD5948       | RAD54L   | cna | gain    | BASIS    |
| PD7067       | RAD54L   | cna | gain    | BASIS    |
| PD7215       | RAD54L   | cna | gain    | BASIS    |
| PD8621       | RAD54L   | cna | gain    | BASIS    |
| PD9004       | RAD54L   | cna | gain    | BASIS    |
| PD9702       | RAD54L   | cna | gain    | BASIS    |
| TCGA-A2-A25B | RASGEF1A | cna | hetloss | TCGA     |
| TCGA-AN-A0XU | RASGEF1A | cna | hetloss | TCGA     |
| TCGA-AO-A0JL | RASGEF1A | cna | hetloss | TCGA     |
| TCGA-BH-A0C0 | RASGEF1A | cna | gain    | TCGA     |
| TCGA-C8-A12L | RASGEF1A | cna | gain    | TCGA     |
| TCGA-E9-A1NC | RASGEF1A | cna | hetloss | TCGA     |
| TCGA-LL-A5YP | RASGEF1A | cna | gain    | TCGA     |
| MB-5070      | RASGEF1A | cna | gain    | METABRIC |
| MB-6098      | RASGEF1A | cna | hetloss | METABRIC |
| MB-7038      | RASGEF1A | cna | hetloss | METABRIC |
| PD11327      | RASGEF1A | cna | gain    | BASIS    |
| PD13296      | RASGEF1A | cna | gain    | BASIS    |
| PD13299      | RASGEF1A | cna | gain    | BASIS    |
| PD23562      | RASGEF1A | cna | gain    | BASIS    |
| PD23574      | RASGEF1A | cna | amp     | BASIS    |
| PD24186      | RASGEF1A | cna | gain    | BASIS    |
| PD24206      | RASGEF1A | cna | gain    | BASIS    |
| PD3905       | RASGEF1A | cna | gain    | BASIS    |

|              |          |     |         |          |
|--------------|----------|-----|---------|----------|
| PD4006       | RASGEF1A | cna | gain    | BASIS    |
| PD4107       | RASGEF1A | cna | gain    | BASIS    |
| PD4826       | RASGEF1A | cna | gain    | BASIS    |
| PD5930       | RASGEF1A | cna | gain    | BASIS    |
| PD5945       | RASGEF1A | cna | gain    | BASIS    |
| PD5948       | RASGEF1A | cna | gain    | BASIS    |
| PD7067       | RASGEF1A | cna | gain    | BASIS    |
| PD7215       | RASGEF1A | cna | gain    | BASIS    |
| PD8621       | RASGEF1A | cna | gain    | BASIS    |
| PD8980       | RASGEF1A | cna | hetloss | BASIS    |
| PD9004       | RASGEF1A | cna | gain    | BASIS    |
| PD9585       | RASGEF1A | cna | hetloss | BASIS    |
| PD9702       | RASGEF1A | cna | gain    | BASIS    |
| TCGA-A2-A25B | RET      | cna | hetloss | TCGA     |
| TCGA-AN-A0XU | RET      | cna | hetloss | TCGA     |
| TCGA-AO-A0JL | RET      | cna | hetloss | TCGA     |
| TCGA-BH-A0C0 | RET      | cna | gain    | TCGA     |
| TCGA-C8-A12L | RET      | cna | gain    | TCGA     |
| TCGA-E9-A1NC | RET      | cna | gain    | TCGA     |
| TCGA-LL-A5YP | RET      | cna | gain    | TCGA     |
| MB-5070      | RET      | cna | gain    | METABRIC |
| MB-6098      | RET      | cna | hetloss | METABRIC |
| MB-7038      | RET      | cna | hetloss | METABRIC |
| PD11327      | RET      | cna | gain    | BASIS    |
| PD13296      | RET      | cna | gain    | BASIS    |
| PD13299      | RET      | cna | gain    | BASIS    |
| PD23562      | RET      | cna | gain    | BASIS    |
| PD23574      | RET      | cna | amp     | BASIS    |
| PD24186      | RET      | cna | gain    | BASIS    |
| PD24206      | RET      | cna | gain    | BASIS    |
| PD3905       | RET      | cna | gain    | BASIS    |
| PD4006       | RET      | cna | gain    | BASIS    |
| PD4107       | RET      | cna | gain    | BASIS    |
| PD4826       | RET      | cna | gain    | BASIS    |
| PD5930       | RET      | cna | gain    | BASIS    |
| PD5945       | RET      | cna | gain    | BASIS    |
| PD5948       | RET      | cna | gain    | BASIS    |
| PD7067       | RET      | cna | gain    | BASIS    |
| PD7215       | RET      | cna | gain    | BASIS    |
| PD8621       | RET      | cna | gain    | BASIS    |
| PD8980       | RET      | cna | hetloss | BASIS    |
| PD9004       | RET      | cna | gain    | BASIS    |
| PD9585       | RET      | cna | hetloss | BASIS    |
| PD9702       | RET      | cna | gain    | BASIS    |
| TCGA-AO-A0JL | RPS19    | cna | hetloss | TCGA     |
| TCGA-BH-A0AW | RPS19    | cna | gain    | TCGA     |
| TCGA-BH-A0C0 | RPS19    | cna | hetloss | TCGA     |

|              |       |     |         |          |
|--------------|-------|-----|---------|----------|
| TCGA-BH-A1FU | RPS19 | cna | hetloss | TCGA     |
| TCGA-D8-A27M | RPS19 | cna | gain    | TCGA     |
| TCGA-E9-A1NC | RPS19 | cna | gain    | TCGA     |
| TCGA-EW-A10X | RPS19 | cna | hetloss | TCGA     |
| TCGA-LL-A5YP | RPS19 | cna | gain    | TCGA     |
| MB-0346      | RPS19 | cna | hetloss | METABRIC |
| MB-6098      | RPS19 | cna | hetloss | METABRIC |
| PD11327      | RPS19 | cna | gain    | BASIS    |
| PD13296      | RPS19 | cna | hetloss | BASIS    |
| PD13299      | RPS19 | cna | gain    | BASIS    |
| PD13771      | RPS19 | cna | hetloss | BASIS    |
| PD23562      | RPS19 | cna | gain    | BASIS    |
| PD23574      | RPS19 | cna | gain    | BASIS    |
| PD24186      | RPS19 | cna | gain    | BASIS    |
| PD3905       | RPS19 | cna | gain    | BASIS    |
| PD4005       | RPS19 | cna | hetloss | BASIS    |
| PD4006       | RPS19 | cna | gain    | BASIS    |
| PD4826       | RPS19 | cna | gain    | BASIS    |
| PD5935       | RPS19 | cna | gain    | BASIS    |
| PD5945       | RPS19 | cna | gain    | BASIS    |
| PD5948       | RPS19 | cna | gain    | BASIS    |
| PD6406       | RPS19 | cna | gain    | BASIS    |
| PD7067       | RPS19 | cna | gain    | BASIS    |
| PD7215       | RPS19 | cna | gain    | BASIS    |
| PD8621       | RPS19 | cna | gain    | BASIS    |
| PD8980       | RPS19 | cna | hetloss | BASIS    |
| PD9585       | RPS19 | cna | gain    | BASIS    |
| PD9702       | RPS19 | cna | gain    | BASIS    |
| TCGA-AO-A0JL | TFG   | cna | gain    | TCGA     |
| TCGA-BH-A0C0 | TFG   | cna | hetloss | TCGA     |
| TCGA-BH-A18R | TFG   | cna | gain    | TCGA     |
| TCGA-BH-A1FU | TFG   | cna | hetloss | TCGA     |
| TCGA-C8-A12L | TFG   | cna | gain    | TCGA     |
| TCGA-E2-A1L7 | TFG   | cna | hetloss | TCGA     |
| TCGA-LL-A5YP | TFG   | cna | gain    | TCGA     |
| MB-0346      | TFG   | cna | hetloss | METABRIC |
| MTS-T0064    | TFG   | cna | gain    | METABRIC |
| PD11327      | TFG   | cna | gain    | BASIS    |
| PD13296      | TFG   | cna | gain    | BASIS    |
| PD13299      | TFG   | cna | gain    | BASIS    |
| PD23561      | TFG   | cna | hetloss | BASIS    |
| PD23574      | TFG   | cna | gain    | BASIS    |
| PD24186      | TFG   | cna | gain    | BASIS    |
| PD24206      | TFG   | cna | gain    | BASIS    |
| PD24337      | TFG   | cna | gain    | BASIS    |
| PD3905       | TFG   | cna | amp     | BASIS    |
| PD4005       | TFG   | cna | hetloss | BASIS    |

|              |       |     |         |          |
|--------------|-------|-----|---------|----------|
| PD4107       | TFG   | cna | gain    | BASIS    |
| PD4826       | TFG   | cna | gain    | BASIS    |
| PD5930       | TFG   | cna | hetloss | BASIS    |
| PD5935       | TFG   | cna | gain    | BASIS    |
| PD5945       | TFG   | cna | amp     | BASIS    |
| PD5948       | TFG   | cna | gain    | BASIS    |
| PD7067       | TFG   | cna | gain    | BASIS    |
| PD7215       | TFG   | cna | gain    | BASIS    |
| PD8621       | TFG   | cna | gain    | BASIS    |
| PD8980       | TFG   | cna | gain    | BASIS    |
| PD9004       | TFG   | cna | gain    | BASIS    |
| PD9702       | TFG   | cna | gain    | BASIS    |
| TCGA-AN-A0XU | AAMP  | cna | gain    | TCGA     |
| TCGA-AO-A0JL | AAMP  | cna | gain    | TCGA     |
| TCGA-BH-A0AW | AAMP  | cna | hetloss | TCGA     |
| TCGA-C8-A12L | AAMP  | cna | hetloss | TCGA     |
| TCGA-D8-A27M | AAMP  | cna | gain    | TCGA     |
| TCGA-E2-A1L7 | AAMP  | cna | hetloss | TCGA     |
| TCGA-E9-A1NC | AAMP  | cna | hetloss | TCGA     |
| MB-2827      | AAMP  | cna | hetloss | METABRIC |
| MB-6098      | AAMP  | cna | hetloss | METABRIC |
| MB-6271      | AAMP  | cna | hetloss | METABRIC |
| PD10014      | AAMP  | cna | gain    | BASIS    |
| PD11327      | AAMP  | cna | hetloss | BASIS    |
| PD13296      | AAMP  | cna | hetloss | BASIS    |
| PD13297      | AAMP  | cna | hetloss | BASIS    |
| PD24186      | AAMP  | cna | gain    | BASIS    |
| PD24337      | AAMP  | cna | hetloss | BASIS    |
| PD3890       | AAMP  | cna | hetloss | BASIS    |
| PD3905       | AAMP  | cna | gain    | BASIS    |
| PD4006       | AAMP  | cna | gain    | BASIS    |
| PD4107       | AAMP  | cna | gain    | BASIS    |
| PD4967       | AAMP  | cna | hetloss | BASIS    |
| PD5935       | AAMP  | cna | amp     | BASIS    |
| PD5945       | AAMP  | cna | amp     | BASIS    |
| PD5948       | AAMP  | cna | gain    | BASIS    |
| PD6413       | AAMP  | cna | hetloss | BASIS    |
| PD6731       | AAMP  | cna | hetloss | BASIS    |
| PD7067       | AAMP  | cna | gain    | BASIS    |
| PD7215       | AAMP  | cna | gain    | BASIS    |
| PD8980       | AAMP  | cna | gain    | BASIS    |
| PD9585       | AAMP  | cna | hetloss | BASIS    |
| TCGA-AN-A0XU | ACSL3 | cna | hetloss | TCGA     |
| TCGA-AO-A0JL | ACSL3 | cna | gain    | TCGA     |
| TCGA-BH-A0AW | ACSL3 | cna | hetloss | TCGA     |
| TCGA-C8-A12L | ACSL3 | cna | hetloss | TCGA     |
| TCGA-D8-A27M | ACSL3 | cna | gain    | TCGA     |

|              |       |     |         |          |
|--------------|-------|-----|---------|----------|
| TCGA-E2-A1L7 | ACSL3 | cna | hetloss | TCGA     |
| TCGA-E9-A1NC | ACSL3 | cna | hetloss | TCGA     |
| MB-2827      | ACSL3 | cna | hetloss | METABRIC |
| MB-6060      | ACSL3 | cna | hetloss | METABRIC |
| MB-6098      | ACSL3 | cna | hetloss | METABRIC |
| MB-6271      | ACSL3 | cna | hetloss | METABRIC |
| MB-7038      | ACSL3 | cna | gain    | METABRIC |
| PD10014      | ACSL3 | cna | gain    | BASIS    |
| PD11327      | ACSL3 | cna | gain    | BASIS    |
| PD13296      | ACSL3 | cna | hetloss | BASIS    |
| PD13297      | ACSL3 | cna | hetloss | BASIS    |
| PD23578      | ACSL3 | cna | hetloss | BASIS    |
| PD24186      | ACSL3 | cna | gain    | BASIS    |
| PD24337      | ACSL3 | cna | hetloss | BASIS    |
| PD3890       | ACSL3 | cna | hetloss | BASIS    |
| PD4967       | ACSL3 | cna | hetloss | BASIS    |
| PD5935       | ACSL3 | cna | gain    | BASIS    |
| PD5945       | ACSL3 | cna | gain    | BASIS    |
| PD5948       | ACSL3 | cna | gain    | BASIS    |
| PD6413       | ACSL3 | cna | hetloss | BASIS    |
| PD6731       | ACSL3 | cna | hetloss | BASIS    |
| PD7067       | ACSL3 | cna | gain    | BASIS    |
| PD7215       | ACSL3 | cna | gain    | BASIS    |
| PD8980       | ACSL3 | cna | hetloss | BASIS    |
| PD9585       | ACSL3 | cna | hetloss | BASIS    |
| TCGA-A2-A25B | AKAP9 | cna | hetloss | TCGA     |
| TCGA-AN-A0XU | AKAP9 | cna | hetloss | TCGA     |
| TCGA-AO-A0JL | AKAP9 | cna | gain    | TCGA     |
| TCGA-BH-A0AW | AKAP9 | cna | gain    | TCGA     |
| TCGA-C8-A12L | AKAP9 | cna | hetloss | TCGA     |
| TCGA-D8-A27M | AKAP9 | cna | gain    | TCGA     |
| TCGA-E2-A1L7 | AKAP9 | cna | hetloss | TCGA     |
| TCGA-E9-A1NC | AKAP9 | cna | gain    | TCGA     |
| MB-0346      | AKAP9 | cna | hetloss | METABRIC |
| MB-7048      | AKAP9 | cna | gain    | METABRIC |
| PD10014      | AKAP9 | cna | gain    | BASIS    |
| PD11327      | AKAP9 | cna | amp     | BASIS    |
| PD13296      | AKAP9 | cna | hetloss | BASIS    |
| PD23574      | AKAP9 | cna | gain    | BASIS    |
| PD24186      | AKAP9 | cna | amp     | BASIS    |
| PD24202      | AKAP9 | cna | hetloss | BASIS    |
| PD3890       | AKAP9 | cna | hetloss | BASIS    |
| PD3905       | AKAP9 | cna | gain    | BASIS    |
| PD4006       | AKAP9 | cna | gain    | BASIS    |
| PD4107       | AKAP9 | cna | gain    | BASIS    |
| PD4826       | AKAP9 | cna | gain    | BASIS    |
| PD5930       | AKAP9 | cna | gain    | BASIS    |

|              |       |     |         |          |
|--------------|-------|-----|---------|----------|
| PD5935       | AKAP9 | cna | gain    | BASIS    |
| PD5945       | AKAP9 | cna | amp     | BASIS    |
| PD5948       | AKAP9 | cna | gain    | BASIS    |
| PD7067       | AKAP9 | cna | amp     | BASIS    |
| PD7215       | AKAP9 | cna | gain    | BASIS    |
| PD8621       | AKAP9 | cna | gain    | BASIS    |
| PD9004       | AKAP9 | cna | gain    | BASIS    |
| PD9702       | AKAP9 | cna | gain    | BASIS    |
| TCGA-AN-A0XU | AKT2  | cna | gain    | TCGA     |
| TCGA-AO-A0JL | AKT2  | cna | hetloss | TCGA     |
| TCGA-BH-A0AW | AKT2  | cna | gain    | TCGA     |
| TCGA-BH-A0C0 | AKT2  | cna | hetloss | TCGA     |
| TCGA-BH-A1FU | AKT2  | cna | hetloss | TCGA     |
| TCGA-D8-A27M | AKT2  | cna | gain    | TCGA     |
| TCGA-EW-A10X | AKT2  | cna | hetloss | TCGA     |
| TCGA-LL-A5YP | AKT2  | cna | gain    | TCGA     |
| MB-0346      | AKT2  | cna | hetloss | METABRIC |
| MB-6098      | AKT2  | cna | gain    | METABRIC |
| MB-7038      | AKT2  | cna | gain    | METABRIC |
| MB-7048      | AKT2  | cna | hetloss | METABRIC |
| PD13296      | AKT2  | cna | hetloss | BASIS    |
| PD13299      | AKT2  | cna | gain    | BASIS    |
| PD23562      | AKT2  | cna | gain    | BASIS    |
| PD23574      | AKT2  | cna | gain    | BASIS    |
| PD23578      | AKT2  | cna | gain    | BASIS    |
| PD24186      | AKT2  | cna | gain    | BASIS    |
| PD3905       | AKT2  | cna | gain    | BASIS    |
| PD4006       | AKT2  | cna | gain    | BASIS    |
| PD4826       | AKT2  | cna | gain    | BASIS    |
| PD5935       | AKT2  | cna | gain    | BASIS    |
| PD5945       | AKT2  | cna | amp     | BASIS    |
| PD5948       | AKT2  | cna | gain    | BASIS    |
| PD6406       | AKT2  | cna | gain    | BASIS    |
| PD7067       | AKT2  | cna | gain    | BASIS    |
| PD7215       | AKT2  | cna | gain    | BASIS    |
| PD8621       | AKT2  | cna | gain    | BASIS    |
| PD9585       | AKT2  | cna | gain    | BASIS    |
| PD9702       | AKT2  | cna | gain    | BASIS    |
| TCGA-A2-A25B | ALK   | cna | hetloss | TCGA     |
| TCGA-AN-A0XU | ALK   | cna | gain    | TCGA     |
| TCGA-BH-A0AW | ALK   | cna | gain    | TCGA     |
| TCGA-BH-A0C0 | ALK   | cna | gain    | TCGA     |
| TCGA-C8-A12L | ALK   | cna | gain    | TCGA     |
| TCGA-D8-A27M | ALK   | cna | gain    | TCGA     |
| TCGA-LL-A5YP | ALK   | cna | gain    | TCGA     |
| MB-0346      | ALK   | cna | gain    | METABRIC |
| MB-5465      | ALK   | cna | amp     | METABRIC |

|              |       |     |         |          |
|--------------|-------|-----|---------|----------|
| MB-6060      | ALK   | cna | gain    | METABRIC |
| MB-6271      | ALK   | cna | hetloss | METABRIC |
| MTS-T0064    | ALK   | cna | gain    | METABRIC |
| PD10014      | ALK   | cna | gain    | BASIS    |
| PD11327      | ALK   | cna | gain    | BASIS    |
| PD13299      | ALK   | cna | gain    | BASIS    |
| PD23562      | ALK   | cna | gain    | BASIS    |
| PD23574      | ALK   | cna | gain    | BASIS    |
| PD24206      | ALK   | cna | gain    | BASIS    |
| PD3890       | ALK   | cna | hetloss | BASIS    |
| PD3905       | ALK   | cna | gain    | BASIS    |
| PD4005       | ALK   | cna | hetloss | BASIS    |
| PD4006       | ALK   | cna | gain    | BASIS    |
| PD5930       | ALK   | cna | gain    | BASIS    |
| PD5935       | ALK   | cna | gain    | BASIS    |
| PD5945       | ALK   | cna | gain    | BASIS    |
| PD5948       | ALK   | cna | gain    | BASIS    |
| PD6406       | ALK   | cna | hetloss | BASIS    |
| PD7067       | ALK   | cna | gain    | BASIS    |
| PD9004       | ALK   | cna | gain    | BASIS    |
| PD9702       | ALK   | cna | gain    | BASIS    |
| TCGA-A2-A25B | ASXL2 | cna | hetloss | TCGA     |
| TCGA-AN-A0XU | ASXL2 | cna | gain    | TCGA     |
| TCGA-BH-A0AW | ASXL2 | cna | gain    | TCGA     |
| TCGA-BH-A0C0 | ASXL2 | cna | gain    | TCGA     |
| TCGA-C8-A12L | ASXL2 | cna | gain    | TCGA     |
| TCGA-D8-A27M | ASXL2 | cna | hetloss | TCGA     |
| TCGA-LL-A5YP | ASXL2 | cna | gain    | TCGA     |
| MB-0346      | ASXL2 | cna | gain    | METABRIC |
| MB-2827      | ASXL2 | cna | hetloss | METABRIC |
| MB-5465      | ASXL2 | cna | amp     | METABRIC |
| MB-6271      | ASXL2 | cna | hetloss | METABRIC |
| MB-7038      | ASXL2 | cna | gain    | METABRIC |
| PD10014      | ASXL2 | cna | gain    | BASIS    |
| PD11327      | ASXL2 | cna | gain    | BASIS    |
| PD13299      | ASXL2 | cna | gain    | BASIS    |
| PD23562      | ASXL2 | cna | gain    | BASIS    |
| PD23578      | ASXL2 | cna | gain    | BASIS    |
| PD24186      | ASXL2 | cna | gain    | BASIS    |
| PD3890       | ASXL2 | cna | hetloss | BASIS    |
| PD3905       | ASXL2 | cna | gain    | BASIS    |
| PD4006       | ASXL2 | cna | gain    | BASIS    |
| PD4826       | ASXL2 | cna | hetloss | BASIS    |
| PD5930       | ASXL2 | cna | gain    | BASIS    |
| PD5935       | ASXL2 | cna | gain    | BASIS    |
| PD5945       | ASXL2 | cna | gain    | BASIS    |
| PD5948       | ASXL2 | cna | gain    | BASIS    |



|              |       |     |         |          |
|--------------|-------|-----|---------|----------|
| PD6406       | ASXL2 | cna | hetloss | BASIS    |
| PD7067       | ASXL2 | cna | gain    | BASIS    |
| PD9004       | ASXL2 | cna | gain    | BASIS    |
| PD9702       | ASXL2 | cna | gain    | BASIS    |
| TCGA-A2-A25B | BTG1  | cna | gain    | TCGA     |
| TCGA-AO-A0JL | BTG1  | cna | hetloss | TCGA     |
| TCGA-BH-A0C0 | BTG1  | cna | hetloss | TCGA     |
| TCGA-BH-A18R | BTG1  | cna | gain    | TCGA     |
| TCGA-BH-A1FU | BTG1  | cna | hetloss | TCGA     |
| TCGA-C8-A12L | BTG1  | cna | gain    | TCGA     |
| TCGA-E2-A1L7 | BTG1  | cna | hetloss | TCGA     |
| TCGA-LL-A5YP | BTG1  | cna | hetloss | TCGA     |
| MB-0346      | BTG1  | cna | gain    | METABRIC |
| MB-2827      | BTG1  | cna | hetloss | METABRIC |
| MB-5070      | BTG1  | cna | hetloss | METABRIC |
| MB-5107      | BTG1  | cna | gain    | METABRIC |
| MB-5465      | BTG1  | cna | gain    | METABRIC |
| MB-6098      | BTG1  | cna | hetloss | METABRIC |
| PD10014      | BTG1  | cna | gain    | BASIS    |
| PD13296      | BTG1  | cna | hetloss | BASIS    |
| PD22355      | BTG1  | cna | hetloss | BASIS    |
| PD23578      | BTG1  | cna | gain    | BASIS    |
| PD3890       | BTG1  | cna | hetloss | BASIS    |
| PD4005       | BTG1  | cna | hetloss | BASIS    |
| PD4826       | BTG1  | cna | gain    | BASIS    |
| PD5945       | BTG1  | cna | gain    | BASIS    |
| PD6406       | BTG1  | cna | hetloss | BASIS    |
| PD6413       | BTG1  | cna | hetloss | BASIS    |
| PD6731       | BTG1  | cna | hetloss | BASIS    |
| PD7067       | BTG1  | cna | gain    | BASIS    |
| PD7215       | BTG1  | cna | hetloss | BASIS    |
| PD8621       | BTG1  | cna | hetloss | BASIS    |
| PD8980       | BTG1  | cna | hetloss | BASIS    |
| PD9585       | BTG1  | cna | hetloss | BASIS    |
| TCGA-AN-A0XU | CASP8 | cna | gain    | TCGA     |
| TCGA-AO-A0JL | CASP8 | cna | gain    | TCGA     |
| TCGA-BH-A0AW | CASP8 | cna | gain    | TCGA     |
| TCGA-C8-A12L | CASP8 | cna | gain    | TCGA     |
| TCGA-D8-A27M | CASP8 | cna | gain    | TCGA     |
| MB-2827      | CASP8 | cna | hetloss | METABRIC |
| MB-6098      | CASP8 | cna | hetloss | METABRIC |
| MB-6271      | CASP8 | cna | hetloss | METABRIC |
| MB-7032      | CASP8 | cna | gain    | METABRIC |
| MB-0420      | CASP8 | cna | gain    | METABRIC |
| PD10014      | CASP8 | cna | gain    | BASIS    |
| PD13296      | CASP8 | cna | hetloss | BASIS    |
| PD13297      | CASP8 | cna | hetloss | BASIS    |

|              |       |     |         |          |
|--------------|-------|-----|---------|----------|
| PD13299      | CASP8 | cna | gain    | BASIS    |
| PD24186      | CASP8 | cna | gain    | BASIS    |
| PD24206      | CASP8 | cna | gain    | BASIS    |
| PD3905       | CASP8 | cna | gain    | BASIS    |
| PD4006       | CASP8 | cna | gain    | BASIS    |
| PD4107       | CASP8 | cna | gain    | BASIS    |
| PD4967       | CASP8 | cna | hetloss | BASIS    |
| PD5935       | CASP8 | cna | gain    | BASIS    |
| PD5945       | CASP8 | cna | gain    | BASIS    |
| PD5948       | CASP8 | cna | gain    | BASIS    |
| PD6413       | CASP8 | cna | hetloss | BASIS    |
| PD6731       | CASP8 | cna | hetloss | BASIS    |
| PD7067       | CASP8 | cna | gain    | BASIS    |
| PD7215       | CASP8 | cna | amp     | BASIS    |
| PD9004       | CASP8 | cna | gain    | BASIS    |
| PD9585       | CASP8 | cna | hetloss | BASIS    |
| PD9702       | CASP8 | cna | gain    | BASIS    |
| TCGA-AO-A0JL | CBLC  | cna | hetloss | TCGA     |
| TCGA-BH-A0AW | CBLC  | cna | gain    | TCGA     |
| TCGA-BH-A0C0 | CBLC  | cna | hetloss | TCGA     |
| TCGA-BH-A1FU | CBLC  | cna | hetloss | TCGA     |
| TCGA-D8-A27M | CBLC  | cna | gain    | TCGA     |
| TCGA-EW-A10X | CBLC  | cna | hetloss | TCGA     |
| TCGA-LL-A5YP | CBLC  | cna | gain    | TCGA     |
| MB-0346      | CBLC  | cna | hetloss | METABRIC |
| MB-6098      | CBLC  | cna | hetloss | METABRIC |
| PD11327      | CBLC  | cna | gain    | BASIS    |
| PD13296      | CBLC  | cna | hetloss | BASIS    |
| PD13299      | CBLC  | cna | gain    | BASIS    |
| PD13771      | CBLC  | cna | hetloss | BASIS    |
| PD23562      | CBLC  | cna | gain    | BASIS    |
| PD23574      | CBLC  | cna | gain    | BASIS    |
| PD24186      | CBLC  | cna | gain    | BASIS    |
| PD24206      | CBLC  | cna | hetloss | BASIS    |
| PD3905       | CBLC  | cna | gain    | BASIS    |
| PD4005       | CBLC  | cna | hetloss | BASIS    |
| PD4006       | CBLC  | cna | gain    | BASIS    |
| PD4826       | CBLC  | cna | gain    | BASIS    |
| PD5935       | CBLC  | cna | gain    | BASIS    |
| PD5945       | CBLC  | cna | amp     | BASIS    |
| PD5948       | CBLC  | cna | gain    | BASIS    |
| PD6406       | CBLC  | cna | gain    | BASIS    |
| PD7067       | CBLC  | cna | gain    | BASIS    |
| PD7215       | CBLC  | cna | gain    | BASIS    |
| PD8621       | CBLC  | cna | gain    | BASIS    |
| PD8980       | CBLC  | cna | hetloss | BASIS    |
| PD9585       | CBLC  | cna | gain    | BASIS    |

|              |      |     |         |          |
|--------------|------|-----|---------|----------|
| TCGA-AN-A0XU | CD22 | cna | gain    | TCGA     |
| TCGA-AO-A0JL | CD22 | cna | hetloss | TCGA     |
| TCGA-BH-A0AW | CD22 | cna | gain    | TCGA     |
| TCGA-BH-A0C0 | CD22 | cna | hetloss | TCGA     |
| TCGA-BH-A1FU | CD22 | cna | hetloss | TCGA     |
| TCGA-C8-A12L | CD22 | cna | gain    | TCGA     |
| TCGA-D8-A27M | CD22 | cna | amp     | TCGA     |
| TCGA-EW-A10X | CD22 | cna | hetloss | TCGA     |
| TCGA-LL-A5YP | CD22 | cna | gain    | TCGA     |
| MB-0346      | CD22 | cna | hetloss | METABRIC |
| MB-6098      | CD22 | cna | gain    | METABRIC |
| MB-7038      | CD22 | cna | gain    | METABRIC |
| PD13296      | CD22 | cna | gain    | BASIS    |
| PD13299      | CD22 | cna | gain    | BASIS    |
| PD23562      | CD22 | cna | gain    | BASIS    |
| PD23574      | CD22 | cna | gain    | BASIS    |
| PD24186      | CD22 | cna | gain    | BASIS    |
| PD3905       | CD22 | cna | gain    | BASIS    |
| PD4006       | CD22 | cna | gain    | BASIS    |
| PD4826       | CD22 | cna | gain    | BASIS    |
| PD5935       | CD22 | cna | gain    | BASIS    |
| PD5945       | CD22 | cna | gain    | BASIS    |
| PD5948       | CD22 | cna | gain    | BASIS    |
| PD6406       | CD22 | cna | gain    | BASIS    |
| PD7067       | CD22 | cna | gain    | BASIS    |
| PD7215       | CD22 | cna | gain    | BASIS    |
| PD8621       | CD22 | cna | gain    | BASIS    |
| PD8980       | CD22 | cna | hetloss | BASIS    |
| PD9585       | CD22 | cna | gain    | BASIS    |
| PD9702       | CD22 | cna | gain    | BASIS    |
| TCGA-AN-A0XU | CD58 | cna | hetloss | TCGA     |
| TCGA-BH-A0AW | CD58 | cna | gain    | TCGA     |
| TCGA-BH-A0C0 | CD58 | cna | hetloss | TCGA     |
| TCGA-BH-A1FU | CD58 | cna | gain    | TCGA     |
| TCGA-C8-A12L | CD58 | cna | amp     | TCGA     |
| TCGA-E2-A1L7 | CD58 | cna | gain    | TCGA     |
| TCGA-LL-A5YP | CD58 | cna | gain    | TCGA     |
| MB-0346      | CD58 | cna | hetloss | METABRIC |
| MB-2827      | CD58 | cna | hetloss | METABRIC |
| MB-7032      | CD58 | cna | gain    | METABRIC |
| MB-7038      | CD58 | cna | gain    | METABRIC |
| PD11327      | CD58 | cna | gain    | BASIS    |
| PD13296      | CD58 | cna | hetloss | BASIS    |
| PD13299      | CD58 | cna | gain    | BASIS    |
| PD22355      | CD58 | cna | hetloss | BASIS    |
| PD23574      | CD58 | cna | gain    | BASIS    |
| PD24186      | CD58 | cna | gain    | BASIS    |

|              |        |     |         |          |
|--------------|--------|-----|---------|----------|
| PD24206      | CD58   | cna | gain    | BASIS    |
| PD3905       | CD58   | cna | gain    | BASIS    |
| PD4006       | CD58   | cna | gain    | BASIS    |
| PD4107       | CD58   | cna | gain    | BASIS    |
| PD5930       | CD58   | cna | gain    | BASIS    |
| PD5945       | CD58   | cna | gain    | BASIS    |
| PD5948       | CD58   | cna | gain    | BASIS    |
| PD7067       | CD58   | cna | amp     | BASIS    |
| PD7215       | CD58   | cna | gain    | BASIS    |
| PD8621       | CD58   | cna | gain    | BASIS    |
| PD9004       | CD58   | cna | hetloss | BASIS    |
| PD9585       | CD58   | cna | hetloss | BASIS    |
| PD9702       | CD58   | cna | gain    | BASIS    |
| TCGA-A2-A25B | CDK6   | cna | hetloss | TCGA     |
| TCGA-AN-A0XU | CDK6   | cna | hetloss | TCGA     |
| TCGA-AO-A0JL | CDK6   | cna | gain    | TCGA     |
| TCGA-BH-A0AW | CDK6   | cna | gain    | TCGA     |
| TCGA-C8-A12L | CDK6   | cna | hetloss | TCGA     |
| TCGA-D8-A27M | CDK6   | cna | gain    | TCGA     |
| TCGA-E2-A1L7 | CDK6   | cna | hetloss | TCGA     |
| TCGA-E9-A1NC | CDK6   | cna | gain    | TCGA     |
| MB-0346      | CDK6   | cna | hetloss | METABRIC |
| MB-7048      | CDK6   | cna | gain    | METABRIC |
| PD10014      | CDK6   | cna | gain    | BASIS    |
| PD11327      | CDK6   | cna | amp     | BASIS    |
| PD13296      | CDK6   | cna | hetloss | BASIS    |
| PD23574      | CDK6   | cna | gain    | BASIS    |
| PD24186      | CDK6   | cna | amp     | BASIS    |
| PD24202      | CDK6   | cna | hetloss | BASIS    |
| PD3890       | CDK6   | cna | hetloss | BASIS    |
| PD3905       | CDK6   | cna | gain    | BASIS    |
| PD4006       | CDK6   | cna | gain    | BASIS    |
| PD4107       | CDK6   | cna | gain    | BASIS    |
| PD4826       | CDK6   | cna | gain    | BASIS    |
| PD5930       | CDK6   | cna | gain    | BASIS    |
| PD5935       | CDK6   | cna | gain    | BASIS    |
| PD5945       | CDK6   | cna | amp     | BASIS    |
| PD5948       | CDK6   | cna | gain    | BASIS    |
| PD7067       | CDK6   | cna | amp     | BASIS    |
| PD7215       | CDK6   | cna | gain    | BASIS    |
| PD8621       | CDK6   | cna | gain    | BASIS    |
| PD9004       | CDK6   | cna | gain    | BASIS    |
| PD9702       | CDK6   | cna | gain    | BASIS    |
| TCGA-A2-A25B | CDKN2A | cna | hetloss | TCGA     |
| TCGA-AO-A0JL | CDKN2A | cna | gain    | TCGA     |
| TCGA-BH-A0AW | CDKN2A | cna | hetloss | TCGA     |
| TCGA-BH-A1FU | CDKN2A | cna | hetloss | TCGA     |

|              |        |     |         |          |
|--------------|--------|-----|---------|----------|
| TCGA-C8-A12L | CDKN2A | cna | hetloss | TCGA     |
| TCGA-E9-A1NC | CDKN2A | cna | homdel  | TCGA     |
| MB-0346      | CDKN2A | cna | hetloss | METABRIC |
| MB-5070      | CDKN2A | cna | hetloss | METABRIC |
| MB-6098      | CDKN2A | cna | hetloss | METABRIC |
| MB-0420      | CDKN2A | cna | homdel  | METABRIC |
| MTS-T0064    | CDKN2A | cna | homdel  | METABRIC |
| PD13297      | CDKN2A | cna | hetloss | BASIS    |
| PD13299      | CDKN2A | cna | amp     | BASIS    |
| PD22355      | CDKN2A | cna | gain    | BASIS    |
| PD23574      | CDKN2A | cna | gain    | BASIS    |
| PD24202      | CDKN2A | cna | hetloss | BASIS    |
| PD24337      | CDKN2A | cna | hetloss | BASIS    |
| PD3905       | CDKN2A | cna | gain    | BASIS    |
| PD4005       | CDKN2A | cna | hetloss | BASIS    |
| PD4006       | CDKN2A | cna | gain    | BASIS    |
| PD4826       | CDKN2A | cna | hetloss | BASIS    |
| PD5945       | CDKN2A | cna | amp     | BASIS    |
| PD5948       | CDKN2A | cna | hetloss | BASIS    |
| PD6406       | CDKN2A | cna | homdel  | BASIS    |
| PD7067       | CDKN2A | cna | homdel  | BASIS    |
| PD8621       | CDKN2A | cna | gain    | BASIS    |
| PD8980       | CDKN2A | cna | homdel  | BASIS    |
| PD9004       | CDKN2A | cna | gain    | BASIS    |
| PD9585       | CDKN2A | cna | hetloss | BASIS    |
| PD9702       | CDKN2A | cna | gain    | BASIS    |
| TCGA-A2-A25B | CDKN2B | cna | hetloss | TCGA     |
| TCGA-AO-A0JL | CDKN2B | cna | gain    | TCGA     |
| TCGA-BH-A0AW | CDKN2B | cna | hetloss | TCGA     |
| TCGA-BH-A1FU | CDKN2B | cna | hetloss | TCGA     |
| TCGA-C8-A12L | CDKN2B | cna | hetloss | TCGA     |
| TCGA-E9-A1NC | CDKN2B | cna | hetloss | TCGA     |
| MB-0346      | CDKN2B | cna | hetloss | METABRIC |
| MB-5070      | CDKN2B | cna | hetloss | METABRIC |
| MB-6098      | CDKN2B | cna | hetloss | METABRIC |
| MB-0420      | CDKN2B | cna | homdel  | METABRIC |
| MTS-T0064    | CDKN2B | cna | homdel  | METABRIC |
| PD13297      | CDKN2B | cna | hetloss | BASIS    |
| PD13299      | CDKN2B | cna | amp     | BASIS    |
| PD22355      | CDKN2B | cna | gain    | BASIS    |
| PD23574      | CDKN2B | cna | gain    | BASIS    |
| PD24202      | CDKN2B | cna | hetloss | BASIS    |
| PD24337      | CDKN2B | cna | hetloss | BASIS    |
| PD3905       | CDKN2B | cna | gain    | BASIS    |
| PD4005       | CDKN2B | cna | hetloss | BASIS    |
| PD4006       | CDKN2B | cna | gain    | BASIS    |
| PD4826       | CDKN2B | cna | hetloss | BASIS    |

|              |         |     |         |          |
|--------------|---------|-----|---------|----------|
| PD5945       | CDKN2B  | cna | amp     | BASIS    |
| PD5948       | CDKN2B  | cna | hetloss | BASIS    |
| PD6406       | CDKN2B  | cna | homdel  | BASIS    |
| PD7067       | CDKN2B  | cna | homdel  | BASIS    |
| PD8621       | CDKN2B  | cna | gain    | BASIS    |
| PD8980       | CDKN2B  | cna | homdel  | BASIS    |
| PD9004       | CDKN2B  | cna | gain    | BASIS    |
| PD9585       | CDKN2B  | cna | hetloss | BASIS    |
| PD9702       | CDKN2B  | cna | gain    | BASIS    |
| TCGA-AO-A0JL | CPS1    | cna | gain    | TCGA     |
| TCGA-BH-A0AW | CPS1    | cna | hetloss | TCGA     |
| TCGA-D8-A27M | CPS1    | cna | amp     | TCGA     |
| TCGA-E2-A1L7 | CPS1    | cna | hetloss | TCGA     |
| TCGA-E9-A1NC | CPS1    | cna | hetloss | TCGA     |
| MB-2827      | CPS1    | cna | hetloss | METABRIC |
| MB-6098      | CPS1    | cna | hetloss | METABRIC |
| MB-6271      | CPS1    | cna | hetloss | METABRIC |
| MB-7032      | CPS1    | cna | gain    | METABRIC |
| PD10014      | CPS1    | cna | gain    | BASIS    |
| PD11327      | CPS1    | cna | gain    | BASIS    |
| PD13296      | CPS1    | cna | hetloss | BASIS    |
| PD13297      | CPS1    | cna | hetloss | BASIS    |
| PD23578      | CPS1    | cna | hetloss | BASIS    |
| PD24186      | CPS1    | cna | gain    | BASIS    |
| PD24206      | CPS1    | cna | gain    | BASIS    |
| PD3890       | CPS1    | cna | hetloss | BASIS    |
| PD3905       | CPS1    | cna | gain    | BASIS    |
| PD4006       | CPS1    | cna | gain    | BASIS    |
| PD4107       | CPS1    | cna | gain    | BASIS    |
| PD4967       | CPS1    | cna | hetloss | BASIS    |
| PD5935       | CPS1    | cna | gain    | BASIS    |
| PD5945       | CPS1    | cna | gain    | BASIS    |
| PD5948       | CPS1    | cna | gain    | BASIS    |
| PD6413       | CPS1    | cna | hetloss | BASIS    |
| PD6731       | CPS1    | cna | hetloss | BASIS    |
| PD7067       | CPS1    | cna | gain    | BASIS    |
| PD7215       | CPS1    | cna | gain    | BASIS    |
| PD9004       | CPS1    | cna | gain    | BASIS    |
| PD9585       | CPS1    | cna | hetloss | BASIS    |
| TCGA-AN-A0XU | CREB3L1 | cna | hetloss | TCGA     |
| TCGA-AO-A0JL | CREB3L1 | cna | hetloss | TCGA     |
| TCGA-BH-A0C0 | CREB3L1 | cna | gain    | TCGA     |
| TCGA-C8-A12L | CREB3L1 | cna | hetloss | TCGA     |
| TCGA-LL-A5YP | CREB3L1 | cna | gain    | TCGA     |
| MB-0346      | CREB3L1 | cna | hetloss | METABRIC |
| MB-6098      | CREB3L1 | cna | hetloss | METABRIC |
| MB-6271      | CREB3L1 | cna | gain    | METABRIC |

|              |         |     |         |          |
|--------------|---------|-----|---------|----------|
| MB-7048      | CREB3L1 | cna | hetloss | METABRIC |
| PD10014      | CREB3L1 | cna | hetloss | BASIS    |
| PD11327      | CREB3L1 | cna | homdel  | BASIS    |
| PD13296      | CREB3L1 | cna | hetloss | BASIS    |
| PD13771      | CREB3L1 | cna | hetloss | BASIS    |
| PD23574      | CREB3L1 | cna | gain    | BASIS    |
| PD24186      | CREB3L1 | cna | gain    | BASIS    |
| PD24206      | CREB3L1 | cna | gain    | BASIS    |
| PD3905       | CREB3L1 | cna | gain    | BASIS    |
| PD4006       | CREB3L1 | cna | gain    | BASIS    |
| PD4107       | CREB3L1 | cna | gain    | BASIS    |
| PD4826       | CREB3L1 | cna | gain    | BASIS    |
| PD5935       | CREB3L1 | cna | gain    | BASIS    |
| PD5945       | CREB3L1 | cna | gain    | BASIS    |
| PD5948       | CREB3L1 | cna | gain    | BASIS    |
| PD6406       | CREB3L1 | cna | hetloss | BASIS    |
| PD6413       | CREB3L1 | cna | hetloss | BASIS    |
| PD7215       | CREB3L1 | cna | gain    | BASIS    |
| PD8621       | CREB3L1 | cna | gain    | BASIS    |
| PD8980       | CREB3L1 | cna | hetloss | BASIS    |
| PD9585       | CREB3L1 | cna | hetloss | BASIS    |
| PD9702       | CREB3L1 | cna | gain    | BASIS    |
| TCGA-A2-A25B | CRKL    | cna | hetloss | TCGA     |
| TCGA-BH-A0C0 | CRKL    | cna | gain    | TCGA     |
| TCGA-BH-A1FU | CRKL    | cna | gain    | TCGA     |
| TCGA-C8-A12L | CRKL    | cna | hetloss | TCGA     |
| TCGA-E9-A1NC | CRKL    | cna | gain    | TCGA     |
| TCGA-LL-A5YP | CRKL    | cna | gain    | TCGA     |
| MB-0346      | CRKL    | cna | gain    | METABRIC |
| MB-6098      | CRKL    | cna | hetloss | METABRIC |
| PD11327      | CRKL    | cna | gain    | BASIS    |
| PD11742      | CRKL    | cna | hetloss | BASIS    |
| PD13296      | CRKL    | cna | gain    | BASIS    |
| PD14442      | CRKL    | cna | hetloss | BASIS    |
| PD23574      | CRKL    | cna | hetloss | BASIS    |
| PD23578      | CRKL    | cna | hetloss | BASIS    |
| PD3890       | CRKL    | cna | hetloss | BASIS    |
| PD3905       | CRKL    | cna | gain    | BASIS    |
| PD4005       | CRKL    | cna | gain    | BASIS    |
| PD4006       | CRKL    | cna | gain    | BASIS    |
| PD4107       | CRKL    | cna | gain    | BASIS    |
| PD4826       | CRKL    | cna | gain    | BASIS    |
| PD4967       | CRKL    | cna | hetloss | BASIS    |
| PD5930       | CRKL    | cna | gain    | BASIS    |
| PD5935       | CRKL    | cna | gain    | BASIS    |
| PD5945       | CRKL    | cna | amp     | BASIS    |
| PD5948       | CRKL    | cna | gain    | BASIS    |

|              |       |     |         |          |
|--------------|-------|-----|---------|----------|
| PD6406       | CRKL  | cna | hetloss | BASIS    |
| PD7067       | CRKL  | cna | gain    | BASIS    |
| PD8621       | CRKL  | cna | gain    | BASIS    |
| PD9004       | CRKL  | cna | gain    | BASIS    |
| PD9702       | CRKL  | cna | gain    | BASIS    |
| TCGA-AN-A0XU | CTLA4 | cna | gain    | TCGA     |
| TCGA-AO-A0JL | CTLA4 | cna | gain    | TCGA     |
| TCGA-BH-A0AW | CTLA4 | cna | gain    | TCGA     |
| TCGA-C8-A12L | CTLA4 | cna | gain    | TCGA     |
| TCGA-D8-A27M | CTLA4 | cna | gain    | TCGA     |
| MB-2827      | CTLA4 | cna | hetloss | METABRIC |
| MB-6098      | CTLA4 | cna | hetloss | METABRIC |
| MB-6271      | CTLA4 | cna | hetloss | METABRIC |
| MB-7032      | CTLA4 | cna | gain    | METABRIC |
| MB-0420      | CTLA4 | cna | gain    | METABRIC |
| PD10014      | CTLA4 | cna | gain    | BASIS    |
| PD11327      | CTLA4 | cna | gain    | BASIS    |
| PD13297      | CTLA4 | cna | hetloss | BASIS    |
| PD13299      | CTLA4 | cna | hetloss | BASIS    |
| PD24186      | CTLA4 | cna | gain    | BASIS    |
| PD24206      | CTLA4 | cna | gain    | BASIS    |
| PD3905       | CTLA4 | cna | gain    | BASIS    |
| PD4006       | CTLA4 | cna | gain    | BASIS    |
| PD4107       | CTLA4 | cna | gain    | BASIS    |
| PD4967       | CTLA4 | cna | hetloss | BASIS    |
| PD5935       | CTLA4 | cna | gain    | BASIS    |
| PD5945       | CTLA4 | cna | gain    | BASIS    |
| PD5948       | CTLA4 | cna | gain    | BASIS    |
| PD6413       | CTLA4 | cna | hetloss | BASIS    |
| PD6731       | CTLA4 | cna | hetloss | BASIS    |
| PD7067       | CTLA4 | cna | gain    | BASIS    |
| PD7215       | CTLA4 | cna | gain    | BASIS    |
| PD9004       | CTLA4 | cna | gain    | BASIS    |
| PD9585       | CTLA4 | cna | hetloss | BASIS    |
| PD9702       | CTLA4 | cna | gain    | BASIS    |
| TCGA-A2-A25B | DDIT3 | cna | gain    | TCGA     |
| TCGA-AO-A0JL | DDIT3 | cna | hetloss | TCGA     |
| TCGA-BH-A18R | DDIT3 | cna | gain    | TCGA     |
| TCGA-BH-A1FU | DDIT3 | cna | hetloss | TCGA     |
| TCGA-C8-A12L | DDIT3 | cna | gain    | TCGA     |
| TCGA-E2-A1L7 | DDIT3 | cna | hetloss | TCGA     |
| TCGA-LL-A5YP | DDIT3 | cna | hetloss | TCGA     |
| MB-0346      | DDIT3 | cna | gain    | METABRIC |
| MB-2827      | DDIT3 | cna | hetloss | METABRIC |
| MB-6060      | DDIT3 | cna | gain    | METABRIC |
| MB-6098      | DDIT3 | cna | hetloss | METABRIC |
| MB-7038      | DDIT3 | cna | hetloss | METABRIC |



|              |       |     |         |          |
|--------------|-------|-----|---------|----------|
| MB-0420      | DDIT3 | cna | hetloss | METABRIC |
| PD11327      | DDIT3 | cna | homdel  | BASIS    |
| PD13296      | DDIT3 | cna | hetloss | BASIS    |
| PD13297      | DDIT3 | cna | hetloss | BASIS    |
| PD24186      | DDIT3 | cna | gain    | BASIS    |
| PD24202      | DDIT3 | cna | hetloss | BASIS    |
| PD24206      | DDIT3 | cna | gain    | BASIS    |
| PD24337      | DDIT3 | cna | hetloss | BASIS    |
| PD3890       | DDIT3 | cna | hetloss | BASIS    |
| PD3905       | DDIT3 | cna | gain    | BASIS    |
| PD4826       | DDIT3 | cna | gain    | BASIS    |
| PD5945       | DDIT3 | cna | gain    | BASIS    |
| PD6413       | DDIT3 | cna | hetloss | BASIS    |
| PD6731       | DDIT3 | cna | hetloss | BASIS    |
| PD7067       | DDIT3 | cna | gain    | BASIS    |
| PD8621       | DDIT3 | cna | hetloss | BASIS    |
| PD9585       | DDIT3 | cna | hetloss | BASIS    |
| PD9702       | DDIT3 | cna | gain    | BASIS    |
| TCGA-A2-A25B | DKK1  | cna | hetloss | TCGA     |
| TCGA-AN-A0XU | DKK1  | cna | hetloss | TCGA     |
| TCGA-AO-A0JL | DKK1  | cna | hetloss | TCGA     |
| TCGA-BH-A0C0 | DKK1  | cna | gain    | TCGA     |
| TCGA-C8-A12L | DKK1  | cna | gain    | TCGA     |
| TCGA-LL-A5YP | DKK1  | cna | gain    | TCGA     |
| MB-0346      | DKK1  | cna | amp     | METABRIC |
| MB-5070      | DKK1  | cna | gain    | METABRIC |
| MB-5107      | DKK1  | cna | gain    | METABRIC |
| MB-6098      | DKK1  | cna | hetloss | METABRIC |
| MB-7038      | DKK1  | cna | hetloss | METABRIC |
| PD11327      | DKK1  | cna | amp     | BASIS    |
| PD11742      | DKK1  | cna | hetloss | BASIS    |
| PD13296      | DKK1  | cna | gain    | BASIS    |
| PD13299      | DKK1  | cna | gain    | BASIS    |
| PD24186      | DKK1  | cna | gain    | BASIS    |
| PD24206      | DKK1  | cna | gain    | BASIS    |
| PD3905       | DKK1  | cna | gain    | BASIS    |
| PD4006       | DKK1  | cna | gain    | BASIS    |
| PD4107       | DKK1  | cna | gain    | BASIS    |
| PD4826       | DKK1  | cna | gain    | BASIS    |
| PD5930       | DKK1  | cna | gain    | BASIS    |
| PD5945       | DKK1  | cna | gain    | BASIS    |
| PD5948       | DKK1  | cna | gain    | BASIS    |
| PD7067       | DKK1  | cna | gain    | BASIS    |
| PD7215       | DKK1  | cna | gain    | BASIS    |
| PD8621       | DKK1  | cna | gain    | BASIS    |
| PD8980       | DKK1  | cna | hetloss | BASIS    |
| PD9585       | DKK1  | cna | hetloss | BASIS    |

|                   |        |     |         |            |
|-------------------|--------|-----|---------|------------|
| PD9702            | DNMT3B | cna | gain    | BASIS      |
| TCGA-A2-A25B      | DNMT3B | cna | gain    | TCGA       |
| TCGA-AO-A0JL      | DNMT3B | cna | gain    | TCGA       |
| TCGA-BH-A0AW      | DNMT3B | cna | gain    | TCGA       |
| TCGA-BH-A0C0      | DNMT3B | cna | gain    | TCGA       |
| TCGA-C8-A12L      | DNMT3B | cna | gain    | TCGA       |
| TCGA-D8-A27M      | DNMT3B | cna | gain    | TCGA       |
| TCGA-E2-A1L7      | DNMT3B | cna | gain    | TCGA       |
| TCGA-E9-A1NC      | DNMT3B | cna | hetloss | TCGA       |
| TCGA-LL-A5YP      | DNMT3B | cna | gain    | TCGA       |
| MB-0346           | DNMT3B | cna | gain    | METABRIC   |
| MB-6060           | DNMT3B | cna | gain    | METABRIC   |
| MB-6098           | DNMT3B | cna | gain    | METABRIC   |
| MB-7038           | DNMT3B | cna | hetloss | METABRIC   |
| P-0010758-T01-IM5 | DNMT3B | cna | amp     | MSK-IMPACT |
| PD11327           | DNMT3B | cna | homdel  | BASIS      |
| PD13296           | DNMT3B | cna | hetloss | BASIS      |
| PD13299           | DNMT3B | cna | gain    | BASIS      |
| PD23574           | DNMT3B | cna | gain    | BASIS      |
| PD24186           | DNMT3B | cna | gain    | BASIS      |
| PD24206           | DNMT3B | cna | gain    | BASIS      |
| PD3905            | DNMT3B | cna | gain    | BASIS      |
| PD4107            | DNMT3B | cna | amp     | BASIS      |
| PD4826            | DNMT3B | cna | gain    | BASIS      |
| PD5935            | DNMT3B | cna | gain    | BASIS      |
| PD5945            | DNMT3B | cna | amp     | BASIS      |
| PD5948            | DNMT3B | cna | gain    | BASIS      |
| PD7067            | DNMT3B | cna | gain    | BASIS      |
| PD7215            | DNMT3B | cna | gain    | BASIS      |
| PD9004            | DNMT3B | cna | gain    | BASIS      |
| PD9702            | DNMT3B | cna | gain    | BASIS      |
| TCGA-AN-A0XU      | FEV    | cna | gain    | TCGA       |
| TCGA-AO-A0JL      | FEV    | cna | gain    | TCGA       |
| TCGA-BH-A0AW      | FEV    | cna | hetloss | TCGA       |
| TCGA-C8-A12L      | FEV    | cna | hetloss | TCGA       |
| TCGA-D8-A27M      | FEV    | cna | gain    | TCGA       |
| TCGA-E2-A1L7      | FEV    | cna | hetloss | TCGA       |
| TCGA-E9-A1NC      | FEV    | cna | hetloss | TCGA       |
| MB-2827           | FEV    | cna | hetloss | METABRIC   |
| MB-6098           | FEV    | cna | hetloss | METABRIC   |
| MB-6271           | FEV    | cna | hetloss | METABRIC   |
| PD10014           | FEV    | cna | gain    | BASIS      |
| PD11327           | FEV    | cna | gain    | BASIS      |
| PD13296           | FEV    | cna | hetloss | BASIS      |
| PD13297           | FEV    | cna | hetloss | BASIS      |
| PD24186           | FEV    | cna | gain    | BASIS      |
| PD24337           | FEV    | cna | hetloss | BASIS      |

|              |          |     |         |          |
|--------------|----------|-----|---------|----------|
| PD3890       | FEV      | cna | hetloss | BASIS    |
| PD3905       | FEV      | cna | gain    | BASIS    |
| PD4006       | FEV      | cna | gain    | BASIS    |
| PD4107       | FEV      | cna | gain    | BASIS    |
| PD4967       | FEV      | cna | hetloss | BASIS    |
| PD5935       | FEV      | cna | gain    | BASIS    |
| PD5945       | FEV      | cna | amp     | BASIS    |
| PD5948       | FEV      | cna | gain    | BASIS    |
| PD6413       | FEV      | cna | hetloss | BASIS    |
| PD6731       | FEV      | cna | hetloss | BASIS    |
| PD7067       | FEV      | cna | gain    | BASIS    |
| PD7215       | FEV      | cna | gain    | BASIS    |
| PD8980       | FEV      | cna | hetloss | BASIS    |
| PD9585       | FEV      | cna | hetloss | BASIS    |
| TCGA-A2-A25B | GLI1     | cna | gain    | TCGA     |
| TCGA-AO-A0JL | GLI1     | cna | hetloss | TCGA     |
| TCGA-BH-A18R | GLI1     | cna | gain    | TCGA     |
| TCGA-BH-A1FU | GLI1     | cna | hetloss | TCGA     |
| TCGA-C8-A12L | GLI1     | cna | gain    | TCGA     |
| TCGA-E2-A1L7 | GLI1     | cna | hetloss | TCGA     |
| TCGA-LL-A5YP | GLI1     | cna | hetloss | TCGA     |
| MB-0346      | GLI1     | cna | gain    | METABRIC |
| MB-2827      | GLI1     | cna | hetloss | METABRIC |
| MB-6060      | GLI1     | cna | gain    | METABRIC |
| MB-6098      | GLI1     | cna | hetloss | METABRIC |
| MB-7038      | GLI1     | cna | hetloss | METABRIC |
| MB-0420      | GLI1     | cna | hetloss | METABRIC |
| PD11327      | GLI1     | cna | homdel  | BASIS    |
| PD13296      | GLI1     | cna | hetloss | BASIS    |
| PD13297      | GLI1     | cna | hetloss | BASIS    |
| PD24186      | GLI1     | cna | gain    | BASIS    |
| PD24202      | GLI1     | cna | hetloss | BASIS    |
| PD24206      | GLI1     | cna | gain    | BASIS    |
| PD24337      | GLI1     | cna | hetloss | BASIS    |
| PD3890       | GLI1     | cna | hetloss | BASIS    |
| PD3905       | GLI1     | cna | gain    | BASIS    |
| PD4826       | GLI1     | cna | gain    | BASIS    |
| PD5945       | GLI1     | cna | gain    | BASIS    |
| PD6413       | GLI1     | cna | hetloss | BASIS    |
| PD6731       | GLI1     | cna | hetloss | BASIS    |
| PD7067       | GLI1     | cna | gain    | BASIS    |
| PD8621       | GLI1     | cna | hetloss | BASIS    |
| PD9585       | GLI1     | cna | hetloss | BASIS    |
| PD9702       | GLI1     | cna | gain    | BASIS    |
| TCGA-AN-A0XU | HIST1H1C | cna | gain    | TCGA     |
| TCGA-AO-A0JL | HIST1H1C | cna | gain    | TCGA     |
| TCGA-BH-A0AW | HIST1H1C | cna | gain    | TCGA     |

|              |           |     |         |          |
|--------------|-----------|-----|---------|----------|
| TCGA-BH-A0C0 | HIST1H1C  | cna | hetloss | TCGA     |
| TCGA-BH-A18R | HIST1H1C  | cna | gain    | TCGA     |
| TCGA-C8-A12L | HIST1H1C  | cna | hetloss | TCGA     |
| MB-5465      | HIST1H1C  | cna | gain    | METABRIC |
| MB-6098      | HIST1H1C  | cna | hetloss | METABRIC |
| MB-7032      | HIST1H1C  | cna | gain    | METABRIC |
| PD11327      | HIST1H1C  | cna | hetloss | BASIS    |
| PD13296      | HIST1H1C  | cna | gain    | BASIS    |
| PD13299      | HIST1H1C  | cna | gain    | BASIS    |
| PD23562      | HIST1H1C  | cna | gain    | BASIS    |
| PD23574      | HIST1H1C  | cna | gain    | BASIS    |
| PD24186      | HIST1H1C  | cna | amp     | BASIS    |
| PD24206      | HIST1H1C  | cna | gain    | BASIS    |
| PD3905       | HIST1H1C  | cna | gain    | BASIS    |
| PD4006       | HIST1H1C  | cna | gain    | BASIS    |
| PD4107       | HIST1H1C  | cna | gain    | BASIS    |
| PD4826       | HIST1H1C  | cna | gain    | BASIS    |
| PD5935       | HIST1H1C  | cna | gain    | BASIS    |
| PD5945       | HIST1H1C  | cna | amp     | BASIS    |
| PD5948       | HIST1H1C  | cna | gain    | BASIS    |
| PD6731       | HIST1H1C  | cna | hetloss | BASIS    |
| PD7067       | HIST1H1C  | cna | amp     | BASIS    |
| PD7215       | HIST1H1C  | cna | gain    | BASIS    |
| PD8621       | HIST1H1C  | cna | amp     | BASIS    |
| PD9004       | HIST1H1C  | cna | gain    | BASIS    |
| PD9585       | HIST1H1C  | cna | gain    | BASIS    |
| PD9702       | HIST1H1C  | cna | gain    | BASIS    |
| TCGA-AN-A0XU | HIST1H2AL | cna | gain    | TCGA     |
| TCGA-AO-A0JL | HIST1H2AL | cna | gain    | TCGA     |
| TCGA-BH-A0AW | HIST1H2AL | cna | gain    | TCGA     |
| TCGA-BH-A0C0 | HIST1H2AL | cna | hetloss | TCGA     |
| TCGA-BH-A18R | HIST1H2AL | cna | gain    | TCGA     |
| TCGA-C8-A12L | HIST1H2AL | cna | hetloss | TCGA     |
| MB-5465      | HIST1H2AL | cna | gain    | METABRIC |
| MB-6098      | HIST1H2AL | cna | hetloss | METABRIC |
| MB-7032      | HIST1H2AL | cna | gain    | METABRIC |
| PD11327      | HIST1H2AL | cna | hetloss | BASIS    |
| PD13296      | HIST1H2AL | cna | gain    | BASIS    |
| PD13297      | HIST1H2AL | cna | hetloss | BASIS    |
| PD13299      | HIST1H2AL | cna | gain    | BASIS    |
| PD23562      | HIST1H2AL | cna | gain    | BASIS    |
| PD24186      | HIST1H2AL | cna | gain    | BASIS    |
| PD24206      | HIST1H2AL | cna | gain    | BASIS    |
| PD3905       | HIST1H2AL | cna | gain    | BASIS    |
| PD4006       | HIST1H2AL | cna | gain    | BASIS    |
| PD4107       | HIST1H2AL | cna | gain    | BASIS    |
| PD4826       | HIST1H2AL | cna | gain    | BASIS    |

|              |           |     |         |          |
|--------------|-----------|-----|---------|----------|
| PD5935       | HIST1H2AL | cna | gain    | BASIS    |
| PD5945       | HIST1H2AL | cna | amp     | BASIS    |
| PD5948       | HIST1H2AL | cna | gain    | BASIS    |
| PD6731       | HIST1H2AL | cna | hetloss | BASIS    |
| PD7067       | HIST1H2AL | cna | amp     | BASIS    |
| PD7215       | HIST1H2AL | cna | gain    | BASIS    |
| PD8621       | HIST1H2AL | cna | amp     | BASIS    |
| PD9004       | HIST1H2AL | cna | gain    | BASIS    |
| PD9585       | HIST1H2AL | cna | gain    | BASIS    |
| PD9702       | HIST1H2AL | cna | gain    | BASIS    |
| TCGA-AN-A0XU | HIST1H2AM | cna | gain    | TCGA     |
| TCGA-AO-A0JL | HIST1H2AM | cna | gain    | TCGA     |
| TCGA-BH-A0AW | HIST1H2AM | cna | gain    | TCGA     |
| TCGA-BH-A0C0 | HIST1H2AM | cna | hetloss | TCGA     |
| TCGA-BH-A18R | HIST1H2AM | cna | gain    | TCGA     |
| TCGA-C8-A12L | HIST1H2AM | cna | hetloss | TCGA     |
| MB-5465      | HIST1H2AM | cna | gain    | METABRIC |
| MB-6098      | HIST1H2AM | cna | hetloss | METABRIC |
| MB-7032      | HIST1H2AM | cna | gain    | METABRIC |
| PD11327      | HIST1H2AM | cna | hetloss | BASIS    |
| PD13296      | HIST1H2AM | cna | gain    | BASIS    |
| PD13297      | HIST1H2AM | cna | hetloss | BASIS    |
| PD13299      | HIST1H2AM | cna | gain    | BASIS    |
| PD23562      | HIST1H2AM | cna | gain    | BASIS    |
| PD24186      | HIST1H2AM | cna | gain    | BASIS    |
| PD24206      | HIST1H2AM | cna | gain    | BASIS    |
| PD3905       | HIST1H2AM | cna | gain    | BASIS    |
| PD4006       | HIST1H2AM | cna | gain    | BASIS    |
| PD4107       | HIST1H2AM | cna | gain    | BASIS    |
| PD4826       | HIST1H2AM | cna | gain    | BASIS    |
| PD5935       | HIST1H2AM | cna | gain    | BASIS    |
| PD5945       | HIST1H2AM | cna | amp     | BASIS    |
| PD5948       | HIST1H2AM | cna | gain    | BASIS    |
| PD6731       | HIST1H2AM | cna | hetloss | BASIS    |
| PD7067       | HIST1H2AM | cna | amp     | BASIS    |
| PD7215       | HIST1H2AM | cna | gain    | BASIS    |
| PD8621       | HIST1H2AM | cna | amp     | BASIS    |
| PD9004       | HIST1H2AM | cna | gain    | BASIS    |
| PD9585       | HIST1H2AM | cna | gain    | BASIS    |
| PD9702       | HIST1H2AM | cna | gain    | BASIS    |
| TCGA-AN-A0XU | HIST1H2BO | cna | gain    | TCGA     |
| TCGA-AO-A0JL | HIST1H2BO | cna | gain    | TCGA     |
| TCGA-BH-A0AW | HIST1H2BO | cna | gain    | TCGA     |
| TCGA-BH-A0C0 | HIST1H2BO | cna | hetloss | TCGA     |
| TCGA-BH-A18R | HIST1H2BO | cna | gain    | TCGA     |
| TCGA-C8-A12L | HIST1H2BO | cna | hetloss | TCGA     |
| MB-5465      | HIST1H2BO | cna | gain    | METABRIC |

|              |           |     |         |          |
|--------------|-----------|-----|---------|----------|
| MB-6098      | HIST1H2BO | cna | hetloss | METABRIC |
| MB-7032      | HIST1H2BO | cna | gain    | METABRIC |
| PD11327      | HIST1H2BO | cna | hetloss | BASIS    |
| PD13296      | HIST1H2BO | cna | gain    | BASIS    |
| PD13297      | HIST1H2BO | cna | hetloss | BASIS    |
| PD13299      | HIST1H2BO | cna | gain    | BASIS    |
| PD23562      | HIST1H2BO | cna | gain    | BASIS    |
| PD24186      | HIST1H2BO | cna | gain    | BASIS    |
| PD24206      | HIST1H2BO | cna | gain    | BASIS    |
| PD3905       | HIST1H2BO | cna | gain    | BASIS    |
| PD4006       | HIST1H2BO | cna | gain    | BASIS    |
| PD4107       | HIST1H2BO | cna | gain    | BASIS    |
| PD4826       | HIST1H2BO | cna | gain    | BASIS    |
| PD5935       | HIST1H2BO | cna | gain    | BASIS    |
| PD5945       | HIST1H2BO | cna | amp     | BASIS    |
| PD5948       | HIST1H2BO | cna | gain    | BASIS    |
| PD6731       | HIST1H2BO | cna | hetloss | BASIS    |
| PD7067       | HIST1H2BO | cna | amp     | BASIS    |
| PD7215       | HIST1H2BO | cna | gain    | BASIS    |
| PD8621       | HIST1H2BO | cna | amp     | BASIS    |
| PD9004       | HIST1H2BO | cna | gain    | BASIS    |
| PD9585       | HIST1H2BO | cna | gain    | BASIS    |
| PD9702       | HIST1H2BO | cna | gain    | BASIS    |
| TCGA-AN-A0XU | HIST1H3A  | cna | gain    | TCGA     |
| TCGA-AO-A0JL | HIST1H3A  | cna | gain    | TCGA     |
| TCGA-BH-A0AW | HIST1H3A  | cna | gain    | TCGA     |
| TCGA-BH-A0C0 | HIST1H3A  | cna | hetloss | TCGA     |
| TCGA-BH-A18R | HIST1H3A  | cna | gain    | TCGA     |
| TCGA-C8-A12L | HIST1H3A  | cna | hetloss | TCGA     |
| MB-5465      | HIST1H3A  | cna | gain    | METABRIC |
| MB-6098      | HIST1H3A  | cna | hetloss | METABRIC |
| MB-7032      | HIST1H3A  | cna | gain    | METABRIC |
| PD11327      | HIST1H3A  | cna | hetloss | BASIS    |
| PD13296      | HIST1H3A  | cna | gain    | BASIS    |
| PD13299      | HIST1H3A  | cna | gain    | BASIS    |
| PD23562      | HIST1H3A  | cna | gain    | BASIS    |
| PD23574      | HIST1H3A  | cna | gain    | BASIS    |
| PD24186      | HIST1H3A  | cna | amp     | BASIS    |
| PD24206      | HIST1H3A  | cna | gain    | BASIS    |
| PD3905       | HIST1H3A  | cna | gain    | BASIS    |
| PD4006       | HIST1H3A  | cna | gain    | BASIS    |
| PD4107       | HIST1H3A  | cna | gain    | BASIS    |
| PD4826       | HIST1H3A  | cna | gain    | BASIS    |
| PD5935       | HIST1H3A  | cna | gain    | BASIS    |
| PD5945       | HIST1H3A  | cna | amp     | BASIS    |
| PD5948       | HIST1H3A  | cna | gain    | BASIS    |
| PD6731       | HIST1H3A  | cna | hetloss | BASIS    |

|              |          |     |         |          |
|--------------|----------|-----|---------|----------|
| PD7067       | HIST1H3A | cna | amp     | BASIS    |
| PD7215       | HIST1H3A | cna | gain    | BASIS    |
| PD8621       | HIST1H3A | cna | amp     | BASIS    |
| PD9004       | HIST1H3A | cna | gain    | BASIS    |
| PD9585       | HIST1H3A | cna | gain    | BASIS    |
| PD9702       | HIST1H3A | cna | gain    | BASIS    |
| TCGA-AN-A0XU | HIST1H3B | cna | gain    | TCGA     |
| TCGA-AO-A0JL | HIST1H3B | cna | gain    | TCGA     |
| TCGA-BH-A0AW | HIST1H3B | cna | gain    | TCGA     |
| TCGA-BH-A0C0 | HIST1H3B | cna | hetloss | TCGA     |
| TCGA-BH-A18R | HIST1H3B | cna | gain    | TCGA     |
| TCGA-C8-A12L | HIST1H3B | cna | hetloss | TCGA     |
| MB-5465      | HIST1H3B | cna | gain    | METABRIC |
| MB-6098      | HIST1H3B | cna | hetloss | METABRIC |
| MB-7032      | HIST1H3B | cna | gain    | METABRIC |
| PD11327      | HIST1H3B | cna | hetloss | BASIS    |
| PD13296      | HIST1H3B | cna | gain    | BASIS    |
| PD13299      | HIST1H3B | cna | gain    | BASIS    |
| PD23562      | HIST1H3B | cna | gain    | BASIS    |
| PD23574      | HIST1H3B | cna | gain    | BASIS    |
| PD24186      | HIST1H3B | cna | amp     | BASIS    |
| PD24206      | HIST1H3B | cna | gain    | BASIS    |
| PD3905       | HIST1H3B | cna | gain    | BASIS    |
| PD4006       | HIST1H3B | cna | gain    | BASIS    |
| PD4107       | HIST1H3B | cna | gain    | BASIS    |
| PD4826       | HIST1H3B | cna | gain    | BASIS    |
| PD5935       | HIST1H3B | cna | gain    | BASIS    |
| PD5945       | HIST1H3B | cna | amp     | BASIS    |
| PD5948       | HIST1H3B | cna | gain    | BASIS    |
| PD6731       | HIST1H3B | cna | hetloss | BASIS    |
| PD7067       | HIST1H3B | cna | amp     | BASIS    |
| PD7215       | HIST1H3B | cna | gain    | BASIS    |
| PD8621       | HIST1H3B | cna | amp     | BASIS    |
| PD9004       | HIST1H3B | cna | gain    | BASIS    |
| PD9585       | HIST1H3B | cna | gain    | BASIS    |
| PD9702       | HIST1H3B | cna | gain    | BASIS    |
| TCGA-AO-A0JL | IKZF2    | cna | gain    | TCGA     |
| TCGA-BH-A0AW | IKZF2    | cna | hetloss | TCGA     |
| TCGA-C8-A12L | IKZF2    | cna | gain    | TCGA     |
| TCGA-D8-A27M | IKZF2    | cna | gain    | TCGA     |
| TCGA-E2-A1L7 | IKZF2    | cna | hetloss | TCGA     |
| TCGA-E9-A1NC | IKZF2    | cna | hetloss | TCGA     |
| MB-2827      | IKZF2    | cna | hetloss | METABRIC |
| MB-6098      | IKZF2    | cna | hetloss | METABRIC |
| MB-6271      | IKZF2    | cna | hetloss | METABRIC |
| PD10014      | IKZF2    | cna | gain    | BASIS    |
| PD11327      | IKZF2    | cna | gain    | BASIS    |

|              |       |     |         |          |
|--------------|-------|-----|---------|----------|
| PD13296      | IKZF2 | cna | hetloss | BASIS    |
| PD13297      | IKZF2 | cna | hetloss | BASIS    |
| PD23578      | IKZF2 | cna | hetloss | BASIS    |
| PD24186      | IKZF2 | cna | gain    | BASIS    |
| PD24206      | IKZF2 | cna | gain    | BASIS    |
| PD24337      | IKZF2 | cna | hetloss | BASIS    |
| PD3890       | IKZF2 | cna | homdel  | BASIS    |
| PD3905       | IKZF2 | cna | gain    | BASIS    |
| PD4107       | IKZF2 | cna | gain    | BASIS    |
| PD4967       | IKZF2 | cna | hetloss | BASIS    |
| PD5935       | IKZF2 | cna | gain    | BASIS    |
| PD5945       | IKZF2 | cna | gain    | BASIS    |
| PD5948       | IKZF2 | cna | gain    | BASIS    |
| PD6413       | IKZF2 | cna | hetloss | BASIS    |
| PD6731       | IKZF2 | cna | hetloss | BASIS    |
| PD7067       | IKZF2 | cna | gain    | BASIS    |
| PD7215       | IKZF2 | cna | gain    | BASIS    |
| PD9585       | IKZF2 | cna | hetloss | BASIS    |
| PD9702       | IKZF2 | cna | gain    | BASIS    |
| TCGA-AN-A0XU | IL21R | cna | gain    | TCGA     |
| TCGA-AO-A0JL | IL21R | cna | gain    | TCGA     |
| TCGA-BH-A0AW | IL21R | cna | gain    | TCGA     |
| TCGA-BH-A0C0 | IL21R | cna | gain    | TCGA     |
| TCGA-C8-A12L | IL21R | cna | gain    | TCGA     |
| TCGA-E2-A1L7 | IL21R | cna | hetloss | TCGA     |
| TCGA-LL-A5YP | IL21R | cna | gain    | TCGA     |
| MB-0346      | IL21R | cna | gain    | METABRIC |
| MB-6271      | IL21R | cna | amp     | METABRIC |
| MB-7032      | IL21R | cna | gain    | METABRIC |
| MB-7038      | IL21R | cna | hetloss | METABRIC |
| MB-0420      | IL21R | cna | hetloss | METABRIC |
| PD10014      | IL21R | cna | hetloss | BASIS    |
| PD11327      | IL21R | cna | hetloss | BASIS    |
| PD11742      | IL21R | cna | gain    | BASIS    |
| PD13299      | IL21R | cna | gain    | BASIS    |
| PD24186      | IL21R | cna | gain    | BASIS    |
| PD24202      | IL21R | cna | hetloss | BASIS    |
| PD3905       | IL21R | cna | gain    | BASIS    |
| PD4006       | IL21R | cna | gain    | BASIS    |
| PD4107       | IL21R | cna | gain    | BASIS    |
| PD4826       | IL21R | cna | gain    | BASIS    |
| PD5930       | IL21R | cna | gain    | BASIS    |
| PD5935       | IL21R | cna | gain    | BASIS    |
| PD5945       | IL21R | cna | amp     | BASIS    |
| PD5948       | IL21R | cna | gain    | BASIS    |
| PD7067       | IL21R | cna | gain    | BASIS    |
| PD7215       | IL21R | cna | amp     | BASIS    |



|              |       |     |         |          |
|--------------|-------|-----|---------|----------|
| PD8980       | IL21R | cna | gain    | BASIS    |
| PD9004       | IL21R | cna | gain    | BASIS    |
| TCGA-AN-A0XU | ITGAL | cna | gain    | TCGA     |
| TCGA-AO-A0JL | ITGAL | cna | gain    | TCGA     |
| TCGA-BH-A0AW | ITGAL | cna | gain    | TCGA     |
| TCGA-BH-A0C0 | ITGAL | cna | gain    | TCGA     |
| TCGA-BH-A18R | ITGAL | cna | gain    | TCGA     |
| TCGA-C8-A12L | ITGAL | cna | gain    | TCGA     |
| TCGA-E2-A1L7 | ITGAL | cna | hetloss | TCGA     |
| TCGA-LL-A5YP | ITGAL | cna | gain    | TCGA     |
| MB-0346      | ITGAL | cna | gain    | METABRIC |
| MB-6271      | ITGAL | cna | amp     | METABRIC |
| MB-7032      | ITGAL | cna | gain    | METABRIC |
| MB-7038      | ITGAL | cna | hetloss | METABRIC |
| MB-7048      | ITGAL | cna | hetloss | METABRIC |
| MB-0420      | ITGAL | cna | hetloss | METABRIC |
| PD11327      | ITGAL | cna | hetloss | BASIS    |
| PD13299      | ITGAL | cna | gain    | BASIS    |
| PD24186      | ITGAL | cna | gain    | BASIS    |
| PD24202      | ITGAL | cna | hetloss | BASIS    |
| PD3905       | ITGAL | cna | gain    | BASIS    |
| PD4006       | ITGAL | cna | gain    | BASIS    |
| PD4107       | ITGAL | cna | gain    | BASIS    |
| PD4826       | ITGAL | cna | gain    | BASIS    |
| PD5930       | ITGAL | cna | gain    | BASIS    |
| PD5935       | ITGAL | cna | gain    | BASIS    |
| PD5945       | ITGAL | cna | amp     | BASIS    |
| PD5948       | ITGAL | cna | gain    | BASIS    |
| PD7067       | ITGAL | cna | gain    | BASIS    |
| PD7215       | ITGAL | cna | amp     | BASIS    |
| PD8980       | ITGAL | cna | gain    | BASIS    |
| PD9004       | ITGAL | cna | gain    | BASIS    |
| TCGA-AN-A0XU | LDHA  | cna | hetloss | TCGA     |
| TCGA-AO-A0JL | LDHA  | cna | hetloss | TCGA     |
| TCGA-BH-A0C0 | LDHA  | cna | hetloss | TCGA     |
| TCGA-C8-A12L | LDHA  | cna | hetloss | TCGA     |
| TCGA-E2-A1L7 | LDHA  | cna | gain    | TCGA     |
| TCGA-E9-A1NC | LDHA  | cna | hetloss | TCGA     |
| TCGA-LL-A5YP | LDHA  | cna | gain    | TCGA     |
| MB-0346      | LDHA  | cna | hetloss | METABRIC |
| MB-6271      | LDHA  | cna | gain    | METABRIC |
| MB-7048      | LDHA  | cna | homdel  | METABRIC |
| MB-0420      | LDHA  | cna | gain    | METABRIC |
| PD10014      | LDHA  | cna | hetloss | BASIS    |
| PD11327      | LDHA  | cna | hetloss | BASIS    |
| PD13296      | LDHA  | cna | hetloss | BASIS    |
| PD23574      | LDHA  | cna | gain    | BASIS    |

|              |      |     |         |          |
|--------------|------|-----|---------|----------|
| PD24186      | LDHA | cna | gain    | BASIS    |
| PD24206      | LDHA | cna | gain    | BASIS    |
| PD3905       | LDHA | cna | gain    | BASIS    |
| PD4107       | LDHA | cna | gain    | BASIS    |
| PD4826       | LDHA | cna | gain    | BASIS    |
| PD5930       | LDHA | cna | gain    | BASIS    |
| PD5935       | LDHA | cna | gain    | BASIS    |
| PD5945       | LDHA | cna | gain    | BASIS    |
| PD5948       | LDHA | cna | gain    | BASIS    |
| PD6413       | LDHA | cna | hetloss | BASIS    |
| PD6731       | LDHA | cna | hetloss | BASIS    |
| PD7215       | LDHA | cna | gain    | BASIS    |
| PD8621       | LDHA | cna | gain    | BASIS    |
| PD8980       | LDHA | cna | homdel  | BASIS    |
| PD9585       | LDHA | cna | hetloss | BASIS    |
| TCGA-A2-A25B | MEN1 | cna | hetloss | TCGA     |
| TCGA-AN-A0XU | MEN1 | cna | hetloss | TCGA     |
| TCGA-AO-A0JL | MEN1 | cna | hetloss | TCGA     |
| TCGA-BH-A18R | MEN1 | cna | homdel  | TCGA     |
| TCGA-LL-A5YP | MEN1 | cna | hetloss | TCGA     |
| MB-0346      | MEN1 | cna | gain    | METABRIC |
| MB-6060      | MEN1 | cna | gain    | METABRIC |
| MB-6098      | MEN1 | cna | hetloss | METABRIC |
| MB-6271      | MEN1 | cna | hetloss | METABRIC |
| PD11327      | MEN1 | cna | hetloss | BASIS    |
| PD13296      | MEN1 | cna | hetloss | BASIS    |
| PD13771      | MEN1 | cna | hetloss | BASIS    |
| PD22355      | MEN1 | cna | gain    | BASIS    |
| PD23574      | MEN1 | cna | gain    | BASIS    |
| PD24186      | MEN1 | cna | gain    | BASIS    |
| PD24206      | MEN1 | cna | gain    | BASIS    |
| PD3905       | MEN1 | cna | gain    | BASIS    |
| PD4006       | MEN1 | cna | gain    | BASIS    |
| PD4107       | MEN1 | cna | gain    | BASIS    |
| PD4826       | MEN1 | cna | gain    | BASIS    |
| PD5930       | MEN1 | cna | gain    | BASIS    |
| PD5935       | MEN1 | cna | gain    | BASIS    |
| PD5945       | MEN1 | cna | amp     | BASIS    |
| PD5948       | MEN1 | cna | gain    | BASIS    |
| PD6413       | MEN1 | cna | gain    | BASIS    |
| PD7067       | MEN1 | cna | gain    | BASIS    |
| PD7215       | MEN1 | cna | gain    | BASIS    |
| PD8621       | MEN1 | cna | gain    | BASIS    |
| PD8980       | MEN1 | cna | hetloss | BASIS    |
| PD9702       | MEN1 | cna | gain    | BASIS    |
| TCGA-A2-A25B | MTAP | cna | hetloss | TCGA     |
| TCGA-AO-A0JL | MTAP | cna | gain    | TCGA     |

|              |      |     |         |          |
|--------------|------|-----|---------|----------|
| TCGA-BH-A0AW | MTAP | cna | hetloss | TCGA     |
| TCGA-BH-A1FU | MTAP | cna | hetloss | TCGA     |
| TCGA-C8-A12L | MTAP | cna | hetloss | TCGA     |
| TCGA-E9-A1NC | MTAP | cna | homdel  | TCGA     |
| MB-0346      | MTAP | cna | hetloss | METABRIC |
| MB-5070      | MTAP | cna | hetloss | METABRIC |
| MB-6098      | MTAP | cna | hetloss | METABRIC |
| MB-0420      | MTAP | cna | homdel  | METABRIC |
| MTS-T0064    | MTAP | cna | homdel  | METABRIC |
| PD13297      | MTAP | cna | hetloss | BASIS    |
| PD13299      | MTAP | cna | amp     | BASIS    |
| PD22355      | MTAP | cna | gain    | BASIS    |
| PD23574      | MTAP | cna | gain    | BASIS    |
| PD24202      | MTAP | cna | hetloss | BASIS    |
| PD24337      | MTAP | cna | hetloss | BASIS    |
| PD3905       | MTAP | cna | gain    | BASIS    |
| PD4005       | MTAP | cna | hetloss | BASIS    |
| PD4006       | MTAP | cna | gain    | BASIS    |
| PD4826       | MTAP | cna | hetloss | BASIS    |
| PD5945       | MTAP | cna | amp     | BASIS    |
| PD5948       | MTAP | cna | hetloss | BASIS    |
| PD6406       | MTAP | cna | homdel  | BASIS    |
| PD7067       | MTAP | cna | homdel  | BASIS    |
| PD8621       | MTAP | cna | gain    | BASIS    |
| PD8980       | MTAP | cna | homdel  | BASIS    |
| PD9004       | MTAP | cna | gain    | BASIS    |
| PD9585       | MTAP | cna | hetloss | BASIS    |
| PD9702       | MTAP | cna | gain    | BASIS    |
| TCGA-A2-A25B | NAV3 | cna | gain    | TCGA     |
| TCGA-AN-A0XU | NAV3 | cna | hetloss | TCGA     |
| TCGA-AO-A0JL | NAV3 | cna | hetloss | TCGA     |
| TCGA-BH-A18R | NAV3 | cna | gain    | TCGA     |
| TCGA-BH-A1FU | NAV3 | cna | hetloss | TCGA     |
| TCGA-C8-A12L | NAV3 | cna | gain    | TCGA     |
| TCGA-E2-A1L7 | NAV3 | cna | hetloss | TCGA     |
| MB-0346      | NAV3 | cna | gain    | METABRIC |
| MB-2827      | NAV3 | cna | hetloss | METABRIC |
| MB-5070      | NAV3 | cna | hetloss | METABRIC |
| MB-5107      | NAV3 | cna | gain    | METABRIC |
| MB-5465      | NAV3 | cna | gain    | METABRIC |
| MB-6098      | NAV3 | cna | hetloss | METABRIC |
| PD10014      | NAV3 | cna | gain    | BASIS    |
| PD13296      | NAV3 | cna | hetloss | BASIS    |
| PD22355      | NAV3 | cna | hetloss | BASIS    |
| PD23578      | NAV3 | cna | gain    | BASIS    |
| PD24202      | NAV3 | cna | hetloss | BASIS    |
| PD24206      | NAV3 | cna | gain    | BASIS    |

|              |       |     |         |          |
|--------------|-------|-----|---------|----------|
| PD3890       | NAV3  | cna | hetloss | BASIS    |
| PD3905       | NAV3  | cna | gain    | BASIS    |
| PD4826       | NAV3  | cna | gain    | BASIS    |
| PD5945       | NAV3  | cna | gain    | BASIS    |
| PD6406       | NAV3  | cna | hetloss | BASIS    |
| PD6413       | NAV3  | cna | hetloss | BASIS    |
| PD6731       | NAV3  | cna | hetloss | BASIS    |
| PD7067       | NAV3  | cna | gain    | BASIS    |
| PD8621       | NAV3  | cna | hetloss | BASIS    |
| PD8980       | NAV3  | cna | hetloss | BASIS    |
| PD9585       | NAV3  | cna | hetloss | BASIS    |
| TCGA-A2-A25B | NCOA4 | cna | hetloss | TCGA     |
| TCGA-AN-A0XU | NCOA4 | cna | hetloss | TCGA     |
| TCGA-AO-A0JL | NCOA4 | cna | hetloss | TCGA     |
| TCGA-BH-A0C0 | NCOA4 | cna | gain    | TCGA     |
| TCGA-C8-A12L | NCOA4 | cna | gain    | TCGA     |
| TCGA-LL-A5YP | NCOA4 | cna | gain    | TCGA     |
| MB-5070      | NCOA4 | cna | gain    | METABRIC |
| MB-6098      | NCOA4 | cna | hetloss | METABRIC |
| MB-7038      | NCOA4 | cna | hetloss | METABRIC |
| PD11327      | NCOA4 | cna | amp     | BASIS    |
| PD11742      | NCOA4 | cna | hetloss | BASIS    |
| PD13296      | NCOA4 | cna | gain    | BASIS    |
| PD13299      | NCOA4 | cna | gain    | BASIS    |
| PD23562      | NCOA4 | cna | gain    | BASIS    |
| PD23574      | NCOA4 | cna | amp     | BASIS    |
| PD24186      | NCOA4 | cna | gain    | BASIS    |
| PD24206      | NCOA4 | cna | gain    | BASIS    |
| PD3905       | NCOA4 | cna | gain    | BASIS    |
| PD4006       | NCOA4 | cna | gain    | BASIS    |
| PD4107       | NCOA4 | cna | gain    | BASIS    |
| PD4826       | NCOA4 | cna | gain    | BASIS    |
| PD5930       | NCOA4 | cna | gain    | BASIS    |
| PD5935       | NCOA4 | cna | hetloss | BASIS    |
| PD5945       | NCOA4 | cna | gain    | BASIS    |
| PD7067       | NCOA4 | cna | gain    | BASIS    |
| PD7215       | NCOA4 | cna | gain    | BASIS    |
| PD8621       | NCOA4 | cna | gain    | BASIS    |
| PD8980       | NCOA4 | cna | hetloss | BASIS    |
| PD9585       | NCOA4 | cna | hetloss | BASIS    |
| PD9702       | NCOA4 | cna | gain    | BASIS    |
| TCGA-A2-A25B | PC    | cna | hetloss | TCGA     |
| TCGA-AN-A0XU | PC    | cna | hetloss | TCGA     |
| TCGA-AO-A0JL | PC    | cna | hetloss | TCGA     |
| TCGA-BH-A18R | PC    | cna | gain    | TCGA     |
| TCGA-EW-A10X | PC    | cna | gain    | TCGA     |
| TCGA-LL-A5YP | PC    | cna | hetloss | TCGA     |

|              |        |     |         |          |
|--------------|--------|-----|---------|----------|
| MB-0346      | PC     | cna | gain    | METABRIC |
| MB-5107      | PC     | cna | gain    | METABRIC |
| MB-6060      | PC     | cna | gain    | METABRIC |
| MB-6271      | PC     | cna | gain    | METABRIC |
| PD11327      | PC     | cna | hetloss | BASIS    |
| PD11742      | PC     | cna | gain    | BASIS    |
| PD22355      | PC     | cna | gain    | BASIS    |
| PD23574      | PC     | cna | gain    | BASIS    |
| PD24186      | PC     | cna | gain    | BASIS    |
| PD3905       | PC     | cna | gain    | BASIS    |
| PD4006       | PC     | cna | amp     | BASIS    |
| PD4107       | PC     | cna | gain    | BASIS    |
| PD4826       | PC     | cna | gain    | BASIS    |
| PD5930       | PC     | cna | gain    | BASIS    |
| PD5935       | PC     | cna | gain    | BASIS    |
| PD5945       | PC     | cna | amp     | BASIS    |
| PD5948       | PC     | cna | amp     | BASIS    |
| PD6413       | PC     | cna | gain    | BASIS    |
| PD7067       | PC     | cna | gain    | BASIS    |
| PD7215       | PC     | cna | gain    | BASIS    |
| PD8621       | PC     | cna | gain    | BASIS    |
| PD8980       | PC     | cna | gain    | BASIS    |
| PD9004       | PC     | cna | gain    | BASIS    |
| PD9702       | PC     | cna | gain    | BASIS    |
| TCGA-A2-A25B | POFUT1 | cna | gain    | TCGA     |
| TCGA-AO-A0JL | POFUT1 | cna | gain    | TCGA     |
| TCGA-BH-A0AW | POFUT1 | cna | gain    | TCGA     |
| TCGA-BH-A0C0 | POFUT1 | cna | gain    | TCGA     |
| TCGA-C8-A12L | POFUT1 | cna | gain    | TCGA     |
| TCGA-D8-A27M | POFUT1 | cna | gain    | TCGA     |
| TCGA-E2-A1L7 | POFUT1 | cna | gain    | TCGA     |
| TCGA-E9-A1NC | POFUT1 | cna | hetloss | TCGA     |
| TCGA-LL-A5YP | POFUT1 | cna | gain    | TCGA     |
| MB-0346      | POFUT1 | cna | gain    | METABRIC |
| MB-5070      | POFUT1 | cna | amp     | METABRIC |
| MB-6060      | POFUT1 | cna | gain    | METABRIC |
| MB-7038      | POFUT1 | cna | hetloss | METABRIC |
| PD11327      | POFUT1 | cna | homdel  | BASIS    |
| PD13296      | POFUT1 | cna | gain    | BASIS    |
| PD13299      | POFUT1 | cna | gain    | BASIS    |
| PD23574      | POFUT1 | cna | gain    | BASIS    |
| PD24186      | POFUT1 | cna | gain    | BASIS    |
| PD24206      | POFUT1 | cna | gain    | BASIS    |
| PD3905       | POFUT1 | cna | gain    | BASIS    |
| PD4107       | POFUT1 | cna | amp     | BASIS    |
| PD4826       | POFUT1 | cna | gain    | BASIS    |
| PD5930       | POFUT1 | cna | gain    | BASIS    |

|              |        |     |         |          |
|--------------|--------|-----|---------|----------|
| PD5935       | POFUT1 | cna | gain    | BASIS    |
| PD5945       | POFUT1 | cna | amp     | BASIS    |
| PD5948       | POFUT1 | cna | gain    | BASIS    |
| PD7067       | POFUT1 | cna | gain    | BASIS    |
| PD7215       | POFUT1 | cna | gain    | BASIS    |
| PD9004       | POFUT1 | cna | gain    | BASIS    |
| PD9702       | POFUT1 | cna | gain    | BASIS    |
| TCGA-AN-A0XU | PTPN22 | cna | hetloss | TCGA     |
| TCGA-BH-A0AW | PTPN22 | cna | gain    | TCGA     |
| TCGA-BH-A0C0 | PTPN22 | cna | hetloss | TCGA     |
| TCGA-BH-A1FU | PTPN22 | cna | gain    | TCGA     |
| TCGA-E2-A1L7 | PTPN22 | cna | gain    | TCGA     |
| TCGA-LL-A5YP | PTPN22 | cna | gain    | TCGA     |
| MB-0346      | PTPN22 | cna | hetloss | METABRIC |
| MB-2827      | PTPN22 | cna | hetloss | METABRIC |
| MB-7032      | PTPN22 | cna | gain    | METABRIC |
| MB-7038      | PTPN22 | cna | gain    | METABRIC |
| PD11327      | PTPN22 | cna | gain    | BASIS    |
| PD11742      | PTPN22 | cna | hetloss | BASIS    |
| PD13296      | PTPN22 | cna | hetloss | BASIS    |
| PD13299      | PTPN22 | cna | gain    | BASIS    |
| PD22355      | PTPN22 | cna | hetloss | BASIS    |
| PD23574      | PTPN22 | cna | gain    | BASIS    |
| PD24186      | PTPN22 | cna | gain    | BASIS    |
| PD24206      | PTPN22 | cna | gain    | BASIS    |
| PD3890       | PTPN22 | cna | hetloss | BASIS    |
| PD3905       | PTPN22 | cna | gain    | BASIS    |
| PD4006       | PTPN22 | cna | gain    | BASIS    |
| PD4107       | PTPN22 | cna | gain    | BASIS    |
| PD5930       | PTPN22 | cna | gain    | BASIS    |
| PD5945       | PTPN22 | cna | gain    | BASIS    |
| PD5948       | PTPN22 | cna | gain    | BASIS    |
| PD7067       | PTPN22 | cna | amp     | BASIS    |
| PD7215       | PTPN22 | cna | gain    | BASIS    |
| PD8621       | PTPN22 | cna | gain    | BASIS    |
| PD9585       | PTPN22 | cna | hetloss | BASIS    |
| PD9702       | PTPN22 | cna | gain    | BASIS    |
| TCGA-A2-A25B | TEK    | cna | hetloss | TCGA     |
| TCGA-AN-A0XU | TEK    | cna | hetloss | TCGA     |
| TCGA-AO-A0JL | TEK    | cna | gain    | TCGA     |
| TCGA-BH-A0AW | TEK    | cna | hetloss | TCGA     |
| TCGA-BH-A1FU | TEK    | cna | hetloss | TCGA     |
| TCGA-C8-A12L | TEK    | cna | hetloss | TCGA     |
| MB-0346      | TEK    | cna | hetloss | METABRIC |
| MB-5070      | TEK    | cna | hetloss | METABRIC |
| MB-6098      | TEK    | cna | gain    | METABRIC |
| MB-0420      | TEK    | cna | hetloss | METABRIC |

|              |      |     |         |          |
|--------------|------|-----|---------|----------|
| MTS-T0064    | TEK  | cna | homdel  | METABRIC |
| PD13297      | TEK  | cna | hetloss | BASIS    |
| PD13299      | TEK  | cna | gain    | BASIS    |
| PD22355      | TEK  | cna | gain    | BASIS    |
| PD23574      | TEK  | cna | gain    | BASIS    |
| PD24202      | TEK  | cna | hetloss | BASIS    |
| PD24337      | TEK  | cna | hetloss | BASIS    |
| PD3905       | TEK  | cna | gain    | BASIS    |
| PD4005       | TEK  | cna | hetloss | BASIS    |
| PD4006       | TEK  | cna | gain    | BASIS    |
| PD4826       | TEK  | cna | gain    | BASIS    |
| PD5935       | TEK  | cna | gain    | BASIS    |
| PD5945       | TEK  | cna | amp     | BASIS    |
| PD6406       | TEK  | cna | homdel  | BASIS    |
| PD7067       | TEK  | cna | gain    | BASIS    |
| PD8621       | TEK  | cna | gain    | BASIS    |
| PD8980       | TEK  | cna | hetloss | BASIS    |
| PD9004       | TEK  | cna | gain    | BASIS    |
| PD9585       | TEK  | cna | hetloss | BASIS    |
| PD9702       | TEK  | cna | gain    | BASIS    |
| TCGA-A2-A25B | TET3 | cna | hetloss | TCGA     |
| TCGA-AN-A0XU | TET3 | cna | gain    | TCGA     |
| TCGA-AO-A0JL | TET3 | cna | gain    | TCGA     |
| TCGA-BH-A0AW | TET3 | cna | gain    | TCGA     |
| TCGA-BH-A0C0 | TET3 | cna | gain    | TCGA     |
| TCGA-D8-A27M | TET3 | cna | gain    | TCGA     |
| TCGA-LL-A5YP | TET3 | cna | gain    | TCGA     |
| MB-6098      | TET3 | cna | gain    | METABRIC |
| MB-6271      | TET3 | cna | hetloss | METABRIC |
| PD11327      | TET3 | cna | gain    | BASIS    |
| PD13296      | TET3 | cna | hetloss | BASIS    |
| PD13299      | TET3 | cna | gain    | BASIS    |
| PD22355      | TET3 | cna | hetloss | BASIS    |
| PD23562      | TET3 | cna | amp     | BASIS    |
| PD23574      | TET3 | cna | gain    | BASIS    |
| PD23578      | TET3 | cna | gain    | BASIS    |
| PD24186      | TET3 | cna | gain    | BASIS    |
| PD24206      | TET3 | cna | gain    | BASIS    |
| PD3890       | TET3 | cna | hetloss | BASIS    |
| PD3905       | TET3 | cna | gain    | BASIS    |
| PD4006       | TET3 | cna | gain    | BASIS    |
| PD4967       | TET3 | cna | hetloss | BASIS    |
| PD5930       | TET3 | cna | gain    | BASIS    |
| PD5935       | TET3 | cna | gain    | BASIS    |
| PD5945       | TET3 | cna | gain    | BASIS    |
| PD7067       | TET3 | cna | gain    | BASIS    |
| PD7215       | TET3 | cna | gain    | BASIS    |

|              |       |     |         |          |
|--------------|-------|-----|---------|----------|
| PD8621       | TET3  | cna | gain    | BASIS    |
| PD9004       | TET3  | cna | gain    | BASIS    |
| PD9702       | TET3  | cna | gain    | BASIS    |
| TCGA-A2-A25B | TFEB  | cna | hetloss | TCGA     |
| TCGA-AO-A0JL | TFEB  | cna | gain    | TCGA     |
| TCGA-BH-A0AW | TFEB  | cna | gain    | TCGA     |
| TCGA-BH-A0C0 | TFEB  | cna | hetloss | TCGA     |
| TCGA-C8-A12L | TFEB  | cna | hetloss | TCGA     |
| TCGA-E2-A1L7 | TFEB  | cna | hetloss | TCGA     |
| TCGA-E9-A1NC | TFEB  | cna | amp     | TCGA     |
| MB-5070      | TFEB  | cna | gain    | METABRIC |
| MB-6060      | TFEB  | cna | hetloss | METABRIC |
| MB-7032      | TFEB  | cna | gain    | METABRIC |
| PD11327      | TFEB  | cna | amp     | BASIS    |
| PD13299      | TFEB  | cna | gain    | BASIS    |
| PD22355      | TFEB  | cna | gain    | BASIS    |
| PD23562      | TFEB  | cna | gain    | BASIS    |
| PD24186      | TFEB  | cna | gain    | BASIS    |
| PD24206      | TFEB  | cna | gain    | BASIS    |
| PD3905       | TFEB  | cna | amp     | BASIS    |
| PD4006       | TFEB  | cna | gain    | BASIS    |
| PD4107       | TFEB  | cna | gain    | BASIS    |
| PD4826       | TFEB  | cna | gain    | BASIS    |
| PD5935       | TFEB  | cna | gain    | BASIS    |
| PD5945       | TFEB  | cna | amp     | BASIS    |
| PD5948       | TFEB  | cna | gain    | BASIS    |
| PD7067       | TFEB  | cna | amp     | BASIS    |
| PD7215       | TFEB  | cna | gain    | BASIS    |
| PD8621       | TFEB  | cna | gain    | BASIS    |
| PD8980       | TFEB  | cna | hetloss | BASIS    |
| PD9004       | TFEB  | cna | gain    | BASIS    |
| PD9585       | TFEB  | cna | gain    | BASIS    |
| PD9702       | TFEB  | cna | gain    | BASIS    |
| TCGA-A2-A25B | BACH1 | cna | hetloss | TCGA     |
| TCGA-BH-A1FU | BACH1 | cna | gain    | TCGA     |
| TCGA-D8-A27M | BACH1 | cna | amp     | TCGA     |
| TCGA-LL-A5YP | BACH1 | cna | gain    | TCGA     |
| MB-0346      | BACH1 | cna | gain    | METABRIC |
| MB-2827      | BACH1 | cna | hetloss | METABRIC |
| MB-7048      | BACH1 | cna | hetloss | METABRIC |
| PD11742      | BACH1 | cna | hetloss | BASIS    |
| PD13296      | BACH1 | cna | gain    | BASIS    |
| PD13297      | BACH1 | cna | hetloss | BASIS    |
| PD13771      | BACH1 | cna | gain    | BASIS    |
| PD22355      | BACH1 | cna | hetloss | BASIS    |
| PD23562      | BACH1 | cna | gain    | BASIS    |
| PD23578      | BACH1 | cna | gain    | BASIS    |



|              |          |     |         |          |
|--------------|----------|-----|---------|----------|
| PD24186      | BACH1    | cna | gain    | BASIS    |
| PD24202      | BACH1    | cna | gain    | BASIS    |
| PD24206      | BACH1    | cna | hetloss | BASIS    |
| PD3905       | BACH1    | cna | gain    | BASIS    |
| PD4107       | BACH1    | cna | gain    | BASIS    |
| PD4826       | BACH1    | cna | gain    | BASIS    |
| PD5930       | BACH1    | cna | gain    | BASIS    |
| PD5945       | BACH1    | cna | gain    | BASIS    |
| PD6731       | BACH1    | cna | gain    | BASIS    |
| PD7067       | BACH1    | cna | gain    | BASIS    |
| PD7215       | BACH1    | cna | gain    | BASIS    |
| PD8621       | BACH1    | cna | gain    | BASIS    |
| PD8980       | BACH1    | cna | hetloss | BASIS    |
| PD9004       | BACH1    | cna | amp     | BASIS    |
| PD9702       | BACH1    | cna | gain    | BASIS    |
| TCGA-AO-A0JL | BARD1    | cna | gain    | TCGA     |
| TCGA-BH-A0AW | BARD1    | cna | hetloss | TCGA     |
| TCGA-C8-A12L | BARD1    | cna | gain    | TCGA     |
| TCGA-D8-A27M | BARD1    | cna | gain    | TCGA     |
| TCGA-E2-A1L7 | BARD1    | cna | hetloss | TCGA     |
| TCGA-E9-A1NC | BARD1    | cna | hetloss | TCGA     |
| MB-2827      | BARD1    | cna | hetloss | METABRIC |
| MB-6098      | BARD1    | cna | hetloss | METABRIC |
| MB-6271      | BARD1    | cna | hetloss | METABRIC |
| PD10014      | BARD1    | cna | gain    | BASIS    |
| PD11327      | BARD1    | cna | gain    | BASIS    |
| PD13296      | BARD1    | cna | hetloss | BASIS    |
| PD13297      | BARD1    | cna | hetloss | BASIS    |
| PD23578      | BARD1    | cna | hetloss | BASIS    |
| PD24186      | BARD1    | cna | gain    | BASIS    |
| PD24206      | BARD1    | cna | gain    | BASIS    |
| PD24337      | BARD1    | cna | hetloss | BASIS    |
| PD3890       | BARD1    | cna | hetloss | BASIS    |
| PD3905       | BARD1    | cna | gain    | BASIS    |
| PD4107       | BARD1    | cna | gain    | BASIS    |
| PD4967       | BARD1    | cna | hetloss | BASIS    |
| PD5935       | BARD1    | cna | gain    | BASIS    |
| PD5945       | BARD1    | cna | gain    | BASIS    |
| PD5948       | BARD1    | cna | gain    | BASIS    |
| PD6413       | BARD1    | cna | hetloss | BASIS    |
| PD6731       | BARD1    | cna | hetloss | BASIS    |
| PD7067       | BARD1    | cna | gain    | BASIS    |
| PD7215       | BARD1    | cna | gain    | BASIS    |
| PD9585       | BARD1    | cna | hetloss | BASIS    |
| TCGA-A2-A25B | CDC42EP2 | cna | hetloss | TCGA     |
| TCGA-AN-A0XU | CDC42EP2 | cna | hetloss | TCGA     |
| TCGA-AO-A0JL | CDC42EP2 | cna | hetloss | TCGA     |

|              |          |     |         |          |
|--------------|----------|-----|---------|----------|
| TCGA-BH-A18R | CDC42EP2 | cna | homdel  | TCGA     |
| TCGA-LL-A5YP | CDC42EP2 | cna | hetloss | TCGA     |
| MB-0346      | CDC42EP2 | cna | gain    | METABRIC |
| MB-6060      | CDC42EP2 | cna | gain    | METABRIC |
| MB-6098      | CDC42EP2 | cna | hetloss | METABRIC |
| MB-6271      | CDC42EP2 | cna | hetloss | METABRIC |
| PD11327      | CDC42EP2 | cna | hetloss | BASIS    |
| PD13296      | CDC42EP2 | cna | hetloss | BASIS    |
| PD13771      | CDC42EP2 | cna | hetloss | BASIS    |
| PD22355      | CDC42EP2 | cna | gain    | BASIS    |
| PD23574      | CDC42EP2 | cna | gain    | BASIS    |
| PD24186      | CDC42EP2 | cna | gain    | BASIS    |
| PD3905       | CDC42EP2 | cna | gain    | BASIS    |
| PD4006       | CDC42EP2 | cna | amp     | BASIS    |
| PD4107       | CDC42EP2 | cna | gain    | BASIS    |
| PD4826       | CDC42EP2 | cna | gain    | BASIS    |
| PD5930       | CDC42EP2 | cna | gain    | BASIS    |
| PD5935       | CDC42EP2 | cna | gain    | BASIS    |
| PD5945       | CDC42EP2 | cna | amp     | BASIS    |
| PD5948       | CDC42EP2 | cna | gain    | BASIS    |
| PD6413       | CDC42EP2 | cna | gain    | BASIS    |
| PD7067       | CDC42EP2 | cna | gain    | BASIS    |
| PD7215       | CDC42EP2 | cna | gain    | BASIS    |
| PD8621       | CDC42EP2 | cna | gain    | BASIS    |
| PD8980       | CDC42EP2 | cna | hetloss | BASIS    |
| PD9702       | CDC42EP2 | cna | gain    | BASIS    |
| TCGA-A2-A25B | CDK4     | cna | gain    | TCGA     |
| TCGA-AO-A0JL | CDK4     | cna | hetloss | TCGA     |
| TCGA-BH-A18R | CDK4     | cna | gain    | TCGA     |
| TCGA-BH-A1FU | CDK4     | cna | hetloss | TCGA     |
| TCGA-C8-A12L | CDK4     | cna | gain    | TCGA     |
| TCGA-E2-A1L7 | CDK4     | cna | hetloss | TCGA     |
| TCGA-LL-A5YP | CDK4     | cna | hetloss | TCGA     |
| MB-0346      | CDK4     | cna | gain    | METABRIC |
| MB-2827      | CDK4     | cna | hetloss | METABRIC |
| MB-6060      | CDK4     | cna | gain    | METABRIC |
| MB-6098      | CDK4     | cna | hetloss | METABRIC |
| MB-0420      | CDK4     | cna | hetloss | METABRIC |
| PD11327      | CDK4     | cna | homdel  | BASIS    |
| PD13296      | CDK4     | cna | hetloss | BASIS    |
| PD13297      | CDK4     | cna | hetloss | BASIS    |
| PD24186      | CDK4     | cna | gain    | BASIS    |
| PD24202      | CDK4     | cna | hetloss | BASIS    |
| PD24206      | CDK4     | cna | gain    | BASIS    |
| PD24337      | CDK4     | cna | hetloss | BASIS    |
| PD3890       | CDK4     | cna | hetloss | BASIS    |
| PD3905       | CDK4     | cna | gain    | BASIS    |

|              |        |     |         |          |
|--------------|--------|-----|---------|----------|
| PD4826       | CDK4   | cna | gain    | BASIS    |
| PD5945       | CDK4   | cna | gain    | BASIS    |
| PD6413       | CDK4   | cna | hetloss | BASIS    |
| PD6731       | CDK4   | cna | hetloss | BASIS    |
| PD7067       | CDK4   | cna | gain    | BASIS    |
| PD8621       | CDK4   | cna | hetloss | BASIS    |
| PD9585       | CDK4   | cna | hetloss | BASIS    |
| PD9702       | CDK4   | cna | gain    | BASIS    |
| TCGA-AN-A0XU | CDKN1A | cna | hetloss | TCGA     |
| TCGA-AO-A0JL | CDKN1A | cna | gain    | TCGA     |
| TCGA-BH-A0AW | CDKN1A | cna | gain    | TCGA     |
| TCGA-BH-A0C0 | CDKN1A | cna | hetloss | TCGA     |
| TCGA-C8-A12L | CDKN1A | cna | hetloss | TCGA     |
| TCGA-E2-A1L7 | CDKN1A | cna | hetloss | TCGA     |
| TCGA-E9-A1NC | CDKN1A | cna | amp     | TCGA     |
| MB-6098      | CDKN1A | cna | gain    | METABRIC |
| MB-7032      | CDKN1A | cna | gain    | METABRIC |
| PD11327      | CDKN1A | cna | hetloss | BASIS    |
| PD13296      | CDKN1A | cna | hetloss | BASIS    |
| PD13299      | CDKN1A | cna | gain    | BASIS    |
| PD23562      | CDKN1A | cna | gain    | BASIS    |
| PD24186      | CDKN1A | cna | gain    | BASIS    |
| PD24206      | CDKN1A | cna | gain    | BASIS    |
| PD3905       | CDKN1A | cna | gain    | BASIS    |
| PD4006       | CDKN1A | cna | gain    | BASIS    |
| PD4107       | CDKN1A | cna | gain    | BASIS    |
| PD4826       | CDKN1A | cna | gain    | BASIS    |
| PD5935       | CDKN1A | cna | gain    | BASIS    |
| PD5945       | CDKN1A | cna | amp     | BASIS    |
| PD5948       | CDKN1A | cna | gain    | BASIS    |
| PD6731       | CDKN1A | cna | hetloss | BASIS    |
| PD7067       | CDKN1A | cna | amp     | BASIS    |
| PD7215       | CDKN1A | cna | gain    | BASIS    |
| PD8621       | CDKN1A | cna | amp     | BASIS    |
| PD9004       | CDKN1A | cna | gain    | BASIS    |
| PD9585       | CDKN1A | cna | gain    | BASIS    |
| PD9702       | CDKN1A | cna | gain    | BASIS    |
| TCGA-AO-A0JL | CEBPA  | cna | hetloss | TCGA     |
| TCGA-BH-A0AW | CEBPA  | cna | gain    | TCGA     |
| TCGA-BH-A0C0 | CEBPA  | cna | hetloss | TCGA     |
| TCGA-BH-A1FU | CEBPA  | cna | hetloss | TCGA     |
| TCGA-C8-A12L | CEBPA  | cna | gain    | TCGA     |
| TCGA-D8-A27M | CEBPA  | cna | amp     | TCGA     |
| TCGA-EW-A10X | CEBPA  | cna | hetloss | TCGA     |
| TCGA-LL-A5YP | CEBPA  | cna | gain    | TCGA     |
| MB-0346      | CEBPA  | cna | hetloss | METABRIC |
| MB-6098      | CEBPA  | cna | gain    | METABRIC |

|              |       |     |         |          |
|--------------|-------|-----|---------|----------|
| MB-7038      | CEBPA | cna | gain    | METABRIC |
| PD13296      | CEBPA | cna | gain    | BASIS    |
| PD13299      | CEBPA | cna | gain    | BASIS    |
| PD23562      | CEBPA | cna | gain    | BASIS    |
| PD23574      | CEBPA | cna | gain    | BASIS    |
| PD24186      | CEBPA | cna | gain    | BASIS    |
| PD3905       | CEBPA | cna | gain    | BASIS    |
| PD4006       | CEBPA | cna | gain    | BASIS    |
| PD4826       | CEBPA | cna | gain    | BASIS    |
| PD4967       | CEBPA | cna | gain    | BASIS    |
| PD5935       | CEBPA | cna | gain    | BASIS    |
| PD5945       | CEBPA | cna | gain    | BASIS    |
| PD5948       | CEBPA | cna | gain    | BASIS    |
| PD7067       | CEBPA | cna | gain    | BASIS    |
| PD7215       | CEBPA | cna | gain    | BASIS    |
| PD8621       | CEBPA | cna | gain    | BASIS    |
| PD8980       | CEBPA | cna | hetloss | BASIS    |
| PD9585       | CEBPA | cna | gain    | BASIS    |
| PD9702       | CEBPA | cna | gain    | BASIS    |
| TCGA-AO-A0JL | ERCC3 | cna | gain    | TCGA     |
| TCGA-D8-A27M | ERCC3 | cna | gain    | TCGA     |
| TCGA-E9-A1NC | ERCC3 | cna | gain    | TCGA     |
| TCGA-LL-A5YP | ERCC3 | cna | hetloss | TCGA     |
| MB-2827      | ERCC3 | cna | hetloss | METABRIC |
| MB-5107      | ERCC3 | cna | hetloss | METABRIC |
| MB-6098      | ERCC3 | cna | hetloss | METABRIC |
| MB-6271      | ERCC3 | cna | hetloss | METABRIC |
| PD11327      | ERCC3 | cna | gain    | BASIS    |
| PD11742      | ERCC3 | cna | hetloss | BASIS    |
| PD13297      | ERCC3 | cna | hetloss | BASIS    |
| PD13299      | ERCC3 | cna | gain    | BASIS    |
| PD23574      | ERCC3 | cna | gain    | BASIS    |
| PD23578      | ERCC3 | cna | hetloss | BASIS    |
| PD24186      | ERCC3 | cna | gain    | BASIS    |
| PD24202      | ERCC3 | cna | hetloss | BASIS    |
| PD24206      | ERCC3 | cna | gain    | BASIS    |
| PD3905       | ERCC3 | cna | gain    | BASIS    |
| PD4107       | ERCC3 | cna | gain    | BASIS    |
| PD4967       | ERCC3 | cna | hetloss | BASIS    |
| PD5935       | ERCC3 | cna | hetloss | BASIS    |
| PD5945       | ERCC3 | cna | gain    | BASIS    |
| PD5948       | ERCC3 | cna | gain    | BASIS    |
| PD6406       | ERCC3 | cna | hetloss | BASIS    |
| PD6413       | ERCC3 | cna | hetloss | BASIS    |
| PD7067       | ERCC3 | cna | gain    | BASIS    |
| PD7215       | ERCC3 | cna | gain    | BASIS    |
| PD9004       | ERCC3 | cna | gain    | BASIS    |

|              |        |     |         |          |
|--------------|--------|-----|---------|----------|
| PD9702       | ERCC3  | cna | gain    | BASIS    |
| TCGA-AN-A0XU | FAM46C | cna | hetloss | TCGA     |
| TCGA-BH-A0AW | FAM46C | cna | gain    | TCGA     |
| TCGA-BH-A0C0 | FAM46C | cna | hetloss | TCGA     |
| TCGA-BH-A1FU | FAM46C | cna | gain    | TCGA     |
| TCGA-C8-A12L | FAM46C | cna | amp     | TCGA     |
| TCGA-E2-A1L7 | FAM46C | cna | gain    | TCGA     |
| TCGA-LL-A5YP | FAM46C | cna | gain    | TCGA     |
| MB-0346      | FAM46C | cna | hetloss | METABRIC |
| MB-2827      | FAM46C | cna | hetloss | METABRIC |
| MB-7032      | FAM46C | cna | gain    | METABRIC |
| MB-7038      | FAM46C | cna | gain    | METABRIC |
| PD11327      | FAM46C | cna | gain    | BASIS    |
| PD13296      | FAM46C | cna | hetloss | BASIS    |
| PD13299      | FAM46C | cna | gain    | BASIS    |
| PD22355      | FAM46C | cna | hetloss | BASIS    |
| PD23574      | FAM46C | cna | gain    | BASIS    |
| PD24186      | FAM46C | cna | gain    | BASIS    |
| PD24206      | FAM46C | cna | gain    | BASIS    |
| PD3905       | FAM46C | cna | gain    | BASIS    |
| PD4006       | FAM46C | cna | gain    | BASIS    |
| PD4107       | FAM46C | cna | gain    | BASIS    |
| PD5930       | FAM46C | cna | gain    | BASIS    |
| PD5945       | FAM46C | cna | gain    | BASIS    |
| PD5948       | FAM46C | cna | gain    | BASIS    |
| PD7067       | FAM46C | cna | amp     | BASIS    |
| PD7215       | FAM46C | cna | gain    | BASIS    |
| PD8621       | FAM46C | cna | gain    | BASIS    |
| PD9585       | FAM46C | cna | hetloss | BASIS    |
| PD9702       | FAM46C | cna | gain    | BASIS    |
| TCGA-AN-A0XU | FANCF  | cna | hetloss | TCGA     |
| TCGA-AO-A0JL | FANCF  | cna | hetloss | TCGA     |
| TCGA-BH-A0C0 | FANCF  | cna | hetloss | TCGA     |
| TCGA-C8-A12L | FANCF  | cna | hetloss | TCGA     |
| TCGA-LL-A5YP | FANCF  | cna | gain    | TCGA     |
| MB-0346      | FANCF  | cna | hetloss | METABRIC |
| MB-6098      | FANCF  | cna | hetloss | METABRIC |
| MB-6271      | FANCF  | cna | gain    | METABRIC |
| MB-7048      | FANCF  | cna | hetloss | METABRIC |
| MB-0420      | FANCF  | cna | amp     | METABRIC |
| PD10014      | FANCF  | cna | hetloss | BASIS    |
| PD13296      | FANCF  | cna | gain    | BASIS    |
| PD23574      | FANCF  | cna | gain    | BASIS    |
| PD24186      | FANCF  | cna | gain    | BASIS    |
| PD24206      | FANCF  | cna | gain    | BASIS    |
| PD3905       | FANCF  | cna | gain    | BASIS    |
| PD4006       | FANCF  | cna | hetloss | BASIS    |

|              |          |     |         |          |
|--------------|----------|-----|---------|----------|
| PD4107       | FANCF    | cna | gain    | BASIS    |
| PD4826       | FANCF    | cna | gain    | BASIS    |
| PD5930       | FANCF    | cna | gain    | BASIS    |
| PD5935       | FANCF    | cna | gain    | BASIS    |
| PD5945       | FANCF    | cna | gain    | BASIS    |
| PD5948       | FANCF    | cna | gain    | BASIS    |
| PD6413       | FANCF    | cna | hetloss | BASIS    |
| PD6731       | FANCF    | cna | hetloss | BASIS    |
| PD7215       | FANCF    | cna | gain    | BASIS    |
| PD8621       | FANCF    | cna | gain    | BASIS    |
| PD8980       | FANCF    | cna | hetloss | BASIS    |
| PD9585       | FANCF    | cna | hetloss | BASIS    |
| TCGA-AN-A0XU | HIST1H1D | cna | gain    | TCGA     |
| TCGA-AO-A0JL | HIST1H1D | cna | gain    | TCGA     |
| TCGA-BH-A0AW | HIST1H1D | cna | gain    | TCGA     |
| TCGA-BH-A0C0 | HIST1H1D | cna | hetloss | TCGA     |
| TCGA-BH-A18R | HIST1H1D | cna | gain    | TCGA     |
| TCGA-C8-A12L | HIST1H1D | cna | hetloss | TCGA     |
| MB-5465      | HIST1H1D | cna | gain    | METABRIC |
| MB-6098      | HIST1H1D | cna | hetloss | METABRIC |
| MB-7032      | HIST1H1D | cna | gain    | METABRIC |
| PD11327      | HIST1H1D | cna | hetloss | BASIS    |
| PD13296      | HIST1H1D | cna | gain    | BASIS    |
| PD13299      | HIST1H1D | cna | gain    | BASIS    |
| PD23562      | HIST1H1D | cna | gain    | BASIS    |
| PD24186      | HIST1H1D | cna | amp     | BASIS    |
| PD24206      | HIST1H1D | cna | gain    | BASIS    |
| PD3905       | HIST1H1D | cna | gain    | BASIS    |
| PD4006       | HIST1H1D | cna | gain    | BASIS    |
| PD4107       | HIST1H1D | cna | gain    | BASIS    |
| PD4826       | HIST1H1D | cna | gain    | BASIS    |
| PD5935       | HIST1H1D | cna | gain    | BASIS    |
| PD5945       | HIST1H1D | cna | amp     | BASIS    |
| PD5948       | HIST1H1D | cna | gain    | BASIS    |
| PD6731       | HIST1H1D | cna | hetloss | BASIS    |
| PD7067       | HIST1H1D | cna | amp     | BASIS    |
| PD7215       | HIST1H1D | cna | gain    | BASIS    |
| PD8621       | HIST1H1D | cna | amp     | BASIS    |
| PD9004       | HIST1H1D | cna | gain    | BASIS    |
| PD9585       | HIST1H1D | cna | gain    | BASIS    |
| PD9702       | HIST1H1D | cna | gain    | BASIS    |
| TCGA-AN-A0XU | HIST1H1E | cna | gain    | TCGA     |
| TCGA-AO-A0JL | HIST1H1E | cna | gain    | TCGA     |
| TCGA-BH-A0AW | HIST1H1E | cna | gain    | TCGA     |
| TCGA-BH-A0C0 | HIST1H1E | cna | hetloss | TCGA     |
| TCGA-BH-A18R | HIST1H1E | cna | gain    | TCGA     |
| TCGA-C8-A12L | HIST1H1E | cna | hetloss | TCGA     |

|              |           |     |         |          |
|--------------|-----------|-----|---------|----------|
| MB-5465      | HIST1H1E  | cna | gain    | METABRIC |
| MB-6098      | HIST1H1E  | cna | hetloss | METABRIC |
| MB-7032      | HIST1H1E  | cna | gain    | METABRIC |
| PD11327      | HIST1H1E  | cna | hetloss | BASIS    |
| PD13296      | HIST1H1E  | cna | gain    | BASIS    |
| PD13299      | HIST1H1E  | cna | gain    | BASIS    |
| PD23562      | HIST1H1E  | cna | gain    | BASIS    |
| PD24186      | HIST1H1E  | cna | amp     | BASIS    |
| PD24206      | HIST1H1E  | cna | gain    | BASIS    |
| PD3905       | HIST1H1E  | cna | gain    | BASIS    |
| PD4006       | HIST1H1E  | cna | gain    | BASIS    |
| PD4107       | HIST1H1E  | cna | gain    | BASIS    |
| PD4826       | HIST1H1E  | cna | gain    | BASIS    |
| PD5935       | HIST1H1E  | cna | gain    | BASIS    |
| PD5945       | HIST1H1E  | cna | amp     | BASIS    |
| PD5948       | HIST1H1E  | cna | gain    | BASIS    |
| PD6731       | HIST1H1E  | cna | hetloss | BASIS    |
| PD7067       | HIST1H1E  | cna | amp     | BASIS    |
| PD7215       | HIST1H1E  | cna | gain    | BASIS    |
| PD8621       | HIST1H1E  | cna | amp     | BASIS    |
| PD9004       | HIST1H1E  | cna | gain    | BASIS    |
| PD9585       | HIST1H1E  | cna | gain    | BASIS    |
| PD9702       | HIST1H1E  | cna | gain    | BASIS    |
| TCGA-AN-A0XU | HIST1H2AC | cna | gain    | TCGA     |
| TCGA-AO-A0JL | HIST1H2AC | cna | gain    | TCGA     |
| TCGA-BH-A0AW | HIST1H2AC | cna | gain    | TCGA     |
| TCGA-BH-A0C0 | HIST1H2AC | cna | hetloss | TCGA     |
| TCGA-BH-A18R | HIST1H2AC | cna | gain    | TCGA     |
| TCGA-C8-A12L | HIST1H2AC | cna | hetloss | TCGA     |
| MB-5465      | HIST1H2AC | cna | gain    | METABRIC |
| MB-6098      | HIST1H2AC | cna | hetloss | METABRIC |
| MB-7032      | HIST1H2AC | cna | gain    | METABRIC |
| PD11327      | HIST1H2AC | cna | hetloss | BASIS    |
| PD13296      | HIST1H2AC | cna | gain    | BASIS    |
| PD13299      | HIST1H2AC | cna | gain    | BASIS    |
| PD23562      | HIST1H2AC | cna | gain    | BASIS    |
| PD24186      | HIST1H2AC | cna | amp     | BASIS    |
| PD24206      | HIST1H2AC | cna | gain    | BASIS    |
| PD3905       | HIST1H2AC | cna | gain    | BASIS    |
| PD4006       | HIST1H2AC | cna | gain    | BASIS    |
| PD4107       | HIST1H2AC | cna | gain    | BASIS    |
| PD4826       | HIST1H2AC | cna | gain    | BASIS    |
| PD5935       | HIST1H2AC | cna | gain    | BASIS    |
| PD5945       | HIST1H2AC | cna | amp     | BASIS    |
| PD5948       | HIST1H2AC | cna | gain    | BASIS    |
| PD6731       | HIST1H2AC | cna | hetloss | BASIS    |
| PD7067       | HIST1H2AC | cna | amp     | BASIS    |

|              |           |     |         |          |
|--------------|-----------|-----|---------|----------|
| PD7215       | HIST1H2AC | cna | gain    | BASIS    |
| PD8621       | HIST1H2AC | cna | amp     | BASIS    |
| PD9004       | HIST1H2AC | cna | gain    | BASIS    |
| PD9585       | HIST1H2AC | cna | gain    | BASIS    |
| PD9702       | HIST1H2AC | cna | gain    | BASIS    |
| TCGA-AN-A0XU | HIST1H2AG | cna | gain    | TCGA     |
| TCGA-AO-A0JL | HIST1H2AG | cna | gain    | TCGA     |
| TCGA-BH-A0AW | HIST1H2AG | cna | gain    | TCGA     |
| TCGA-BH-A0C0 | HIST1H2AG | cna | hetloss | TCGA     |
| TCGA-BH-A18R | HIST1H2AG | cna | gain    | TCGA     |
| TCGA-C8-A12L | HIST1H2AG | cna | hetloss | TCGA     |
| MB-5465      | HIST1H2AG | cna | gain    | METABRIC |
| MB-6098      | HIST1H2AG | cna | hetloss | METABRIC |
| MB-7032      | HIST1H2AG | cna | gain    | METABRIC |
| PD11327      | HIST1H2AG | cna | hetloss | BASIS    |
| PD13296      | HIST1H2AG | cna | gain    | BASIS    |
| PD13299      | HIST1H2AG | cna | gain    | BASIS    |
| PD23562      | HIST1H2AG | cna | gain    | BASIS    |
| PD24186      | HIST1H2AG | cna | gain    | BASIS    |
| PD24206      | HIST1H2AG | cna | gain    | BASIS    |
| PD3905       | HIST1H2AG | cna | gain    | BASIS    |
| PD4006       | HIST1H2AG | cna | gain    | BASIS    |
| PD4107       | HIST1H2AG | cna | gain    | BASIS    |
| PD4826       | HIST1H2AG | cna | gain    | BASIS    |
| PD5935       | HIST1H2AG | cna | gain    | BASIS    |
| PD5945       | HIST1H2AG | cna | amp     | BASIS    |
| PD5948       | HIST1H2AG | cna | gain    | BASIS    |
| PD6731       | HIST1H2AG | cna | hetloss | BASIS    |
| PD7067       | HIST1H2AG | cna | amp     | BASIS    |
| PD7215       | HIST1H2AG | cna | gain    | BASIS    |
| PD8621       | HIST1H2AG | cna | amp     | BASIS    |
| PD9004       | HIST1H2AG | cna | gain    | BASIS    |
| PD9585       | HIST1H2AG | cna | gain    | BASIS    |
| PD9702       | HIST1H2AG | cna | gain    | BASIS    |
| TCGA-AN-A0XU | HIST1H2BC | cna | gain    | TCGA     |
| TCGA-AO-A0JL | HIST1H2BC | cna | gain    | TCGA     |
| TCGA-BH-A0AW | HIST1H2BC | cna | gain    | TCGA     |
| TCGA-BH-A0C0 | HIST1H2BC | cna | hetloss | TCGA     |
| TCGA-BH-A18R | HIST1H2BC | cna | gain    | TCGA     |
| TCGA-C8-A12L | HIST1H2BC | cna | hetloss | TCGA     |
| MB-5465      | HIST1H2BC | cna | gain    | METABRIC |
| MB-6098      | HIST1H2BC | cna | hetloss | METABRIC |
| MB-7032      | HIST1H2BC | cna | gain    | METABRIC |
| PD11327      | HIST1H2BC | cna | hetloss | BASIS    |
| PD13296      | HIST1H2BC | cna | gain    | BASIS    |
| PD13299      | HIST1H2BC | cna | gain    | BASIS    |
| PD23562      | HIST1H2BC | cna | gain    | BASIS    |



|              |           |     |         |          |
|--------------|-----------|-----|---------|----------|
| PD24186      | HIST1H2BC | cna | amp     | BASIS    |
| PD24206      | HIST1H2BC | cna | gain    | BASIS    |
| PD3905       | HIST1H2BC | cna | gain    | BASIS    |
| PD4006       | HIST1H2BC | cna | gain    | BASIS    |
| PD4107       | HIST1H2BC | cna | gain    | BASIS    |
| PD4826       | HIST1H2BC | cna | gain    | BASIS    |
| PD5935       | HIST1H2BC | cna | gain    | BASIS    |
| PD5945       | HIST1H2BC | cna | amp     | BASIS    |
| PD5948       | HIST1H2BC | cna | gain    | BASIS    |
| PD6731       | HIST1H2BC | cna | hetloss | BASIS    |
| PD7067       | HIST1H2BC | cna | amp     | BASIS    |
| PD7215       | HIST1H2BC | cna | gain    | BASIS    |
| PD8621       | HIST1H2BC | cna | amp     | BASIS    |
| PD9004       | HIST1H2BC | cna | gain    | BASIS    |
| PD9585       | HIST1H2BC | cna | gain    | BASIS    |
| PD9702       | HIST1H2BC | cna | gain    | BASIS    |
| TCGA-AN-A0XU | HIST1H2BD | cna | gain    | TCGA     |
| TCGA-AO-A0JL | HIST1H2BD | cna | gain    | TCGA     |
| TCGA-BH-A0AW | HIST1H2BD | cna | gain    | TCGA     |
| TCGA-BH-A0C0 | HIST1H2BD | cna | hetloss | TCGA     |
| TCGA-BH-A18R | HIST1H2BD | cna | gain    | TCGA     |
| TCGA-C8-A12L | HIST1H2BD | cna | hetloss | TCGA     |
| MB-5465      | HIST1H2BD | cna | gain    | METABRIC |
| MB-6098      | HIST1H2BD | cna | hetloss | METABRIC |
| MB-7032      | HIST1H2BD | cna | gain    | METABRIC |
| PD11327      | HIST1H2BD | cna | hetloss | BASIS    |
| PD13296      | HIST1H2BD | cna | gain    | BASIS    |
| PD13299      | HIST1H2BD | cna | gain    | BASIS    |
| PD23562      | HIST1H2BD | cna | gain    | BASIS    |
| PD24186      | HIST1H2BD | cna | amp     | BASIS    |
| PD24206      | HIST1H2BD | cna | gain    | BASIS    |
| PD3905       | HIST1H2BD | cna | gain    | BASIS    |
| PD4006       | HIST1H2BD | cna | gain    | BASIS    |
| PD4107       | HIST1H2BD | cna | gain    | BASIS    |
| PD4826       | HIST1H2BD | cna | gain    | BASIS    |
| PD5935       | HIST1H2BD | cna | gain    | BASIS    |
| PD5945       | HIST1H2BD | cna | amp     | BASIS    |
| PD5948       | HIST1H2BD | cna | gain    | BASIS    |
| PD6731       | HIST1H2BD | cna | hetloss | BASIS    |
| PD7067       | HIST1H2BD | cna | amp     | BASIS    |
| PD7215       | HIST1H2BD | cna | gain    | BASIS    |
| PD8621       | HIST1H2BD | cna | amp     | BASIS    |
| PD9004       | HIST1H2BD | cna | gain    | BASIS    |
| PD9585       | HIST1H2BD | cna | gain    | BASIS    |
| PD9702       | HIST1H2BD | cna | gain    | BASIS    |
| TCGA-AN-A0XU | HIST1H2BJ | cna | gain    | TCGA     |
| TCGA-AO-A0JL | HIST1H2BJ | cna | gain    | TCGA     |

|              |           |     |         |          |
|--------------|-----------|-----|---------|----------|
| TCGA-BH-A0AW | HIST1H2BJ | cna | gain    | TCGA     |
| TCGA-BH-A0C0 | HIST1H2BJ | cna | hetloss | TCGA     |
| TCGA-BH-A18R | HIST1H2BJ | cna | gain    | TCGA     |
| TCGA-C8-A12L | HIST1H2BJ | cna | hetloss | TCGA     |
| MB-5465      | HIST1H2BJ | cna | gain    | METABRIC |
| MB-6098      | HIST1H2BJ | cna | hetloss | METABRIC |
| MB-7032      | HIST1H2BJ | cna | gain    | METABRIC |
| PD11327      | HIST1H2BJ | cna | hetloss | BASIS    |
| PD13296      | HIST1H2BJ | cna | gain    | BASIS    |
| PD13299      | HIST1H2BJ | cna | gain    | BASIS    |
| PD23562      | HIST1H2BJ | cna | gain    | BASIS    |
| PD24186      | HIST1H2BJ | cna | gain    | BASIS    |
| PD24206      | HIST1H2BJ | cna | gain    | BASIS    |
| PD3905       | HIST1H2BJ | cna | gain    | BASIS    |
| PD4006       | HIST1H2BJ | cna | gain    | BASIS    |
| PD4107       | HIST1H2BJ | cna | gain    | BASIS    |
| PD4826       | HIST1H2BJ | cna | gain    | BASIS    |
| PD5935       | HIST1H2BJ | cna | gain    | BASIS    |
| PD5945       | HIST1H2BJ | cna | amp     | BASIS    |
| PD5948       | HIST1H2BJ | cna | gain    | BASIS    |
| PD6731       | HIST1H2BJ | cna | hetloss | BASIS    |
| PD7067       | HIST1H2BJ | cna | amp     | BASIS    |
| PD7215       | HIST1H2BJ | cna | gain    | BASIS    |
| PD8621       | HIST1H2BJ | cna | amp     | BASIS    |
| PD9004       | HIST1H2BJ | cna | gain    | BASIS    |
| PD9585       | HIST1H2BJ | cna | gain    | BASIS    |
| PD9702       | HIST1H2BJ | cna | gain    | BASIS    |
| TCGA-AN-A0XU | HIST1H2BK | cna | gain    | TCGA     |
| TCGA-AO-A0JL | HIST1H2BK | cna | gain    | TCGA     |
| TCGA-BH-A0AW | HIST1H2BK | cna | gain    | TCGA     |
| TCGA-BH-A0C0 | HIST1H2BK | cna | hetloss | TCGA     |
| TCGA-BH-A18R | HIST1H2BK | cna | gain    | TCGA     |
| TCGA-C8-A12L | HIST1H2BK | cna | hetloss | TCGA     |
| MB-5465      | HIST1H2BK | cna | gain    | METABRIC |
| MB-6098      | HIST1H2BK | cna | hetloss | METABRIC |
| MB-7032      | HIST1H2BK | cna | gain    | METABRIC |
| PD11327      | HIST1H2BK | cna | hetloss | BASIS    |
| PD13296      | HIST1H2BK | cna | gain    | BASIS    |
| PD13299      | HIST1H2BK | cna | gain    | BASIS    |
| PD23562      | HIST1H2BK | cna | gain    | BASIS    |
| PD24186      | HIST1H2BK | cna | gain    | BASIS    |
| PD24206      | HIST1H2BK | cna | gain    | BASIS    |
| PD3905       | HIST1H2BK | cna | gain    | BASIS    |
| PD4006       | HIST1H2BK | cna | gain    | BASIS    |
| PD4107       | HIST1H2BK | cna | gain    | BASIS    |
| PD4826       | HIST1H2BK | cna | gain    | BASIS    |
| PD5935       | HIST1H2BK | cna | gain    | BASIS    |

|              |           |     |         |          |
|--------------|-----------|-----|---------|----------|
| PD5945       | HIST1H2BK | cna | amp     | BASIS    |
| PD5948       | HIST1H2BK | cna | gain    | BASIS    |
| PD6731       | HIST1H2BK | cna | hetloss | BASIS    |
| PD7067       | HIST1H2BK | cna | amp     | BASIS    |
| PD7215       | HIST1H2BK | cna | gain    | BASIS    |
| PD8621       | HIST1H2BK | cna | amp     | BASIS    |
| PD9004       | HIST1H2BK | cna | gain    | BASIS    |
| PD9585       | HIST1H2BK | cna | gain    | BASIS    |
| PD9702       | HIST1H2BK | cna | gain    | BASIS    |
| TCGA-AN-A0XU | HIST1H4I  | cna | gain    | TCGA     |
| TCGA-AO-A0JL | HIST1H4I  | cna | gain    | TCGA     |
| TCGA-BH-A0AW | HIST1H4I  | cna | gain    | TCGA     |
| TCGA-BH-A0C0 | HIST1H4I  | cna | hetloss | TCGA     |
| TCGA-BH-A18R | HIST1H4I  | cna | gain    | TCGA     |
| TCGA-C8-A12L | HIST1H4I  | cna | hetloss | TCGA     |
| MB-5465      | HIST1H4I  | cna | gain    | METABRIC |
| MB-6098      | HIST1H4I  | cna | hetloss | METABRIC |
| MB-7032      | HIST1H4I  | cna | gain    | METABRIC |
| PD11327      | HIST1H4I  | cna | hetloss | BASIS    |
| PD13296      | HIST1H4I  | cna | gain    | BASIS    |
| PD13299      | HIST1H4I  | cna | gain    | BASIS    |
| PD23562      | HIST1H4I  | cna | gain    | BASIS    |
| PD24186      | HIST1H4I  | cna | gain    | BASIS    |
| PD24206      | HIST1H4I  | cna | gain    | BASIS    |
| PD3905       | HIST1H4I  | cna | gain    | BASIS    |
| PD4006       | HIST1H4I  | cna | gain    | BASIS    |
| PD4107       | HIST1H4I  | cna | gain    | BASIS    |
| PD4826       | HIST1H4I  | cna | gain    | BASIS    |
| PD5935       | HIST1H4I  | cna | gain    | BASIS    |
| PD5945       | HIST1H4I  | cna | amp     | BASIS    |
| PD5948       | HIST1H4I  | cna | gain    | BASIS    |
| PD6731       | HIST1H4I  | cna | hetloss | BASIS    |
| PD7067       | HIST1H4I  | cna | amp     | BASIS    |
| PD7215       | HIST1H4I  | cna | gain    | BASIS    |
| PD8621       | HIST1H4I  | cna | amp     | BASIS    |
| PD9004       | HIST1H4I  | cna | gain    | BASIS    |
| PD9585       | HIST1H4I  | cna | gain    | BASIS    |
| PD9702       | HIST1H4I  | cna | gain    | BASIS    |
| TCGA-A2-A25B | JAZF1     | cna | gain    | TCGA     |
| TCGA-BH-A0AW | JAZF1     | cna | gain    | TCGA     |
| TCGA-BH-A0C0 | JAZF1     | cna | hetloss | TCGA     |
| TCGA-C8-A12L | JAZF1     | cna | gain    | TCGA     |
| TCGA-D8-A27M | JAZF1     | cna | hetloss | TCGA     |
| TCGA-LL-A5YP | JAZF1     | cna | hetloss | TCGA     |
| MB-0346      | JAZF1     | cna | gain    | METABRIC |
| MB-5465      | JAZF1     | cna | gain    | METABRIC |
| MB-6098      | JAZF1     | cna | hetloss | METABRIC |

|              |        |     |         |          |
|--------------|--------|-----|---------|----------|
| MB-0420      | JAZF1  | cna | hetloss | METABRIC |
| PD10014      | JAZF1  | cna | hetloss | BASIS    |
| PD11327      | JAZF1  | cna | gain    | BASIS    |
| PD13296      | JAZF1  | cna | gain    | BASIS    |
| PD13297      | JAZF1  | cna | hetloss | BASIS    |
| PD23578      | JAZF1  | cna | hetloss | BASIS    |
| PD24186      | JAZF1  | cna | gain    | BASIS    |
| PD24206      | JAZF1  | cna | gain    | BASIS    |
| PD24337      | JAZF1  | cna | hetloss | BASIS    |
| PD3905       | JAZF1  | cna | gain    | BASIS    |
| PD4006       | JAZF1  | cna | gain    | BASIS    |
| PD4107       | JAZF1  | cna | amp     | BASIS    |
| PD4826       | JAZF1  | cna | gain    | BASIS    |
| PD5945       | JAZF1  | cna | amp     | BASIS    |
| PD6406       | JAZF1  | cna | hetloss | BASIS    |
| PD6413       | JAZF1  | cna | gain    | BASIS    |
| PD7215       | JAZF1  | cna | gain    | BASIS    |
| PD8621       | JAZF1  | cna | gain    | BASIS    |
| PD9585       | JAZF1  | cna | gain    | BASIS    |
| PD9702       | JAZF1  | cna | gain    | BASIS    |
| TCGA-A2-A25B | MALAT1 | cna | hetloss | TCGA     |
| TCGA-AN-A0XU | MALAT1 | cna | hetloss | TCGA     |
| TCGA-AO-A0JL | MALAT1 | cna | hetloss | TCGA     |
| TCGA-BH-A18R | MALAT1 | cna | homdel  | TCGA     |
| TCGA-LL-A5YP | MALAT1 | cna | hetloss | TCGA     |
| MB-0346      | MALAT1 | cna | gain    | METABRIC |
| MB-6060      | MALAT1 | cna | gain    | METABRIC |
| MB-6271      | MALAT1 | cna | hetloss | METABRIC |
| PD11327      | MALAT1 | cna | hetloss | BASIS    |
| PD13296      | MALAT1 | cna | hetloss | BASIS    |
| PD13771      | MALAT1 | cna | hetloss | BASIS    |
| PD22355      | MALAT1 | cna | gain    | BASIS    |
| PD23574      | MALAT1 | cna | gain    | BASIS    |
| PD24186      | MALAT1 | cna | gain    | BASIS    |
| PD3905       | MALAT1 | cna | gain    | BASIS    |
| PD4006       | MALAT1 | cna | amp     | BASIS    |
| PD4107       | MALAT1 | cna | gain    | BASIS    |
| PD4826       | MALAT1 | cna | gain    | BASIS    |
| PD5930       | MALAT1 | cna | gain    | BASIS    |
| PD5935       | MALAT1 | cna | gain    | BASIS    |
| PD5948       | MALAT1 | cna | gain    | BASIS    |
| PD6406       | MALAT1 | cna | amp     | BASIS    |
| PD6413       | MALAT1 | cna | gain    | BASIS    |
| PD7067       | MALAT1 | cna | gain    | BASIS    |
| PD7215       | MALAT1 | cna | gain    | BASIS    |
| PD8621       | MALAT1 | cna | gain    | BASIS    |
| PD8980       | MALAT1 | cna | gain    | BASIS    |

|              |        |     |         |          |
|--------------|--------|-----|---------|----------|
| PD9004       | MALAT1 | cna | gain    | BASIS    |
| PD9702       | MALAT1 | cna | gain    | BASIS    |
| TCGA-A2-A25B | MAPK1  | cna | hetloss | TCGA     |
| TCGA-BH-A0C0 | MAPK1  | cna | gain    | TCGA     |
| TCGA-BH-A1FU | MAPK1  | cna | gain    | TCGA     |
| TCGA-C8-A12L | MAPK1  | cna | hetloss | TCGA     |
| TCGA-E9-A1NC | MAPK1  | cna | gain    | TCGA     |
| TCGA-LL-A5YP | MAPK1  | cna | gain    | TCGA     |
| MB-0346      | MAPK1  | cna | gain    | METABRIC |
| MB-6098      | MAPK1  | cna | hetloss | METABRIC |
| PD11327      | MAPK1  | cna | gain    | BASIS    |
| PD11742      | MAPK1  | cna | hetloss | BASIS    |
| PD13296      | MAPK1  | cna | gain    | BASIS    |
| PD14442      | MAPK1  | cna | hetloss | BASIS    |
| PD22355      | MAPK1  | cna | hetloss | BASIS    |
| PD23562      | MAPK1  | cna | gain    | BASIS    |
| PD23574      | MAPK1  | cna | hetloss | BASIS    |
| PD23578      | MAPK1  | cna | hetloss | BASIS    |
| PD3905       | MAPK1  | cna | gain    | BASIS    |
| PD4006       | MAPK1  | cna | gain    | BASIS    |
| PD4107       | MAPK1  | cna | gain    | BASIS    |
| PD4826       | MAPK1  | cna | gain    | BASIS    |
| PD4967       | MAPK1  | cna | hetloss | BASIS    |
| PD5930       | MAPK1  | cna | gain    | BASIS    |
| PD5935       | MAPK1  | cna | gain    | BASIS    |
| PD5945       | MAPK1  | cna | amp     | BASIS    |
| PD5948       | MAPK1  | cna | gain    | BASIS    |
| PD7067       | MAPK1  | cna | gain    | BASIS    |
| PD8621       | MAPK1  | cna | gain    | BASIS    |
| PD9004       | MAPK1  | cna | gain    | BASIS    |
| PD9702       | MAPK1  | cna | gain    | BASIS    |
| TCGA-AN-A0XU | MYOD1  | cna | hetloss | TCGA     |
| TCGA-AO-A0JL | MYOD1  | cna | hetloss | TCGA     |
| TCGA-BH-A0C0 | MYOD1  | cna | hetloss | TCGA     |
| TCGA-C8-A12L | MYOD1  | cna | hetloss | TCGA     |
| TCGA-E2-A1L7 | MYOD1  | cna | gain    | TCGA     |
| TCGA-E9-A1NC | MYOD1  | cna | hetloss | TCGA     |
| TCGA-LL-A5YP | MYOD1  | cna | gain    | TCGA     |
| MB-0346      | MYOD1  | cna | hetloss | METABRIC |
| MB-6271      | MYOD1  | cna | gain    | METABRIC |
| MB-7048      | MYOD1  | cna | hetloss | METABRIC |
| MB-0420      | MYOD1  | cna | gain    | METABRIC |
| PD10014      | MYOD1  | cna | hetloss | BASIS    |
| PD11327      | MYOD1  | cna | hetloss | BASIS    |
| PD13296      | MYOD1  | cna | hetloss | BASIS    |
| PD23574      | MYOD1  | cna | gain    | BASIS    |
| PD24186      | MYOD1  | cna | gain    | BASIS    |

|              |        |     |         |          |
|--------------|--------|-----|---------|----------|
| PD24206      | MYOD1  | cna | amp     | BASIS    |
| PD3905       | MYOD1  | cna | gain    | BASIS    |
| PD4107       | MYOD1  | cna | gain    | BASIS    |
| PD4826       | MYOD1  | cna | gain    | BASIS    |
| PD5930       | MYOD1  | cna | gain    | BASIS    |
| PD5935       | MYOD1  | cna | gain    | BASIS    |
| PD5945       | MYOD1  | cna | gain    | BASIS    |
| PD5948       | MYOD1  | cna | gain    | BASIS    |
| PD6413       | MYOD1  | cna | hetloss | BASIS    |
| PD6731       | MYOD1  | cna | hetloss | BASIS    |
| PD7215       | MYOD1  | cna | gain    | BASIS    |
| PD8980       | MYOD1  | cna | hetloss | BASIS    |
| PD9585       | MYOD1  | cna | hetloss | BASIS    |
| MB-2827      | NKX2-1 | cna | hetloss | METABRIC |
| MB-5070      | NKX2-1 | cna | hetloss | METABRIC |
| MB-5465      | NKX2-1 | cna | hetloss | METABRIC |
| MB-6060      | NKX2-1 | cna | gain    | METABRIC |
| PD10014      | NKX2-1 | cna | hetloss | BASIS    |
| PD13297      | NKX2-1 | cna | hetloss | BASIS    |
| PD22355      | NKX2-1 | cna | hetloss | BASIS    |
| PD23578      | NKX2-1 | cna | hetloss | BASIS    |
| PD24186      | NKX2-1 | cna | gain    | BASIS    |
| PD24202      | NKX2-1 | cna | hetloss | BASIS    |
| PD24206      | NKX2-1 | cna | gain    | BASIS    |
| PD24337      | NKX2-1 | cna | hetloss | BASIS    |
| PD3890       | NKX2-1 | cna | hetloss | BASIS    |
| PD3905       | NKX2-1 | cna | gain    | BASIS    |
| PD4005       | NKX2-1 | cna | hetloss | BASIS    |
| PD4006       | NKX2-1 | cna | hetloss | BASIS    |
| PD4107       | NKX2-1 | cna | hetloss | BASIS    |
| PD4826       | NKX2-1 | cna | gain    | BASIS    |
| PD5930       | NKX2-1 | cna | hetloss | BASIS    |
| PD5945       | NKX2-1 | cna | gain    | BASIS    |
| PD5948       | NKX2-1 | cna | gain    | BASIS    |
| PD6406       | NKX2-1 | cna | hetloss | BASIS    |
| PD7067       | NKX2-1 | cna | gain    | BASIS    |
| PD7215       | NKX2-1 | cna | gain    | BASIS    |
| PD8621       | NKX2-1 | cna | gain    | BASIS    |
| PD8980       | NKX2-1 | cna | gain    | BASIS    |
| PD9004       | NKX2-1 | cna | gain    | BASIS    |
| PD9585       | NKX2-1 | cna | gain    | BASIS    |
| PD9702       | NKX2-1 | cna | gain    | BASIS    |
| TCGA-AN-A0XU | NRAS   | cna | hetloss | TCGA     |
| TCGA-BH-A0AW | NRAS   | cna | gain    | TCGA     |
| TCGA-BH-A0C0 | NRAS   | cna | hetloss | TCGA     |
| TCGA-BH-A1FU | NRAS   | cna | gain    | TCGA     |
| TCGA-E2-A1L7 | NRAS   | cna | gain    | TCGA     |

|              |       |     |         |          |
|--------------|-------|-----|---------|----------|
| TCGA-LL-A5YP | NRAS  | cna | gain    | TCGA     |
| MB-0346      | NRAS  | cna | hetloss | METABRIC |
| MB-2827      | NRAS  | cna | hetloss | METABRIC |
| MB-7032      | NRAS  | cna | gain    | METABRIC |
| MB-7038      | NRAS  | cna | gain    | METABRIC |
| PD11327      | NRAS  | cna | gain    | BASIS    |
| PD11742      | NRAS  | cna | hetloss | BASIS    |
| PD13296      | NRAS  | cna | hetloss | BASIS    |
| PD13299      | NRAS  | cna | gain    | BASIS    |
| PD22355      | NRAS  | cna | hetloss | BASIS    |
| PD23574      | NRAS  | cna | gain    | BASIS    |
| PD24186      | NRAS  | cna | gain    | BASIS    |
| PD24206      | NRAS  | cna | gain    | BASIS    |
| PD3905       | NRAS  | cna | gain    | BASIS    |
| PD4006       | NRAS  | cna | gain    | BASIS    |
| PD4107       | NRAS  | cna | gain    | BASIS    |
| PD5930       | NRAS  | cna | gain    | BASIS    |
| PD5945       | NRAS  | cna | gain    | BASIS    |
| PD5948       | NRAS  | cna | gain    | BASIS    |
| PD7067       | NRAS  | cna | amp     | BASIS    |
| PD7215       | NRAS  | cna | gain    | BASIS    |
| PD8621       | NRAS  | cna | gain    | BASIS    |
| PD9585       | NRAS  | cna | hetloss | BASIS    |
| PD9702       | NRAS  | cna | gain    | BASIS    |
| TCGA-A2-A25B | STAT6 | cna | gain    | TCGA     |
| TCGA-AO-A0JL | STAT6 | cna | hetloss | TCGA     |
| TCGA-BH-A18R | STAT6 | cna | gain    | TCGA     |
| TCGA-BH-A1FU | STAT6 | cna | hetloss | TCGA     |
| TCGA-C8-A12L | STAT6 | cna | gain    | TCGA     |
| TCGA-E2-A1L7 | STAT6 | cna | hetloss | TCGA     |
| TCGA-LL-A5YP | STAT6 | cna | hetloss | TCGA     |
| MB-0346      | STAT6 | cna | gain    | METABRIC |
| MB-2827      | STAT6 | cna | hetloss | METABRIC |
| MB-6098      | STAT6 | cna | hetloss | METABRIC |
| MB-7038      | STAT6 | cna | hetloss | METABRIC |
| MB-0420      | STAT6 | cna | hetloss | METABRIC |
| PD11327      | STAT6 | cna | homdel  | BASIS    |
| PD13296      | STAT6 | cna | hetloss | BASIS    |
| PD13297      | STAT6 | cna | hetloss | BASIS    |
| PD24186      | STAT6 | cna | gain    | BASIS    |
| PD24202      | STAT6 | cna | hetloss | BASIS    |
| PD24206      | STAT6 | cna | gain    | BASIS    |
| PD24337      | STAT6 | cna | hetloss | BASIS    |
| PD3890       | STAT6 | cna | hetloss | BASIS    |
| PD3905       | STAT6 | cna | gain    | BASIS    |
| PD4826       | STAT6 | cna | gain    | BASIS    |
| PD5945       | STAT6 | cna | gain    | BASIS    |

|              |        |     |         |          |
|--------------|--------|-----|---------|----------|
| PD6413       | STAT6  | cna | hetloss | BASIS    |
| PD6731       | STAT6  | cna | hetloss | BASIS    |
| PD7067       | STAT6  | cna | gain    | BASIS    |
| PD8621       | STAT6  | cna | hetloss | BASIS    |
| PD9585       | STAT6  | cna | hetloss | BASIS    |
| PD9702       | STAT6  | cna | gain    | BASIS    |
| TCGA-AN-A0XU | TRIM27 | cna | gain    | TCGA     |
| TCGA-AO-A0JL | TRIM27 | cna | gain    | TCGA     |
| TCGA-BH-A0AW | TRIM27 | cna | gain    | TCGA     |
| TCGA-BH-A0C0 | TRIM27 | cna | hetloss | TCGA     |
| TCGA-BH-A18R | TRIM27 | cna | gain    | TCGA     |
| TCGA-C8-A12L | TRIM27 | cna | hetloss | TCGA     |
| MB-5465      | TRIM27 | cna | gain    | METABRIC |
| MB-6098      | TRIM27 | cna | hetloss | METABRIC |
| MB-7032      | TRIM27 | cna | gain    | METABRIC |
| PD11327      | TRIM27 | cna | hetloss | BASIS    |
| PD13296      | TRIM27 | cna | gain    | BASIS    |
| PD13299      | TRIM27 | cna | gain    | BASIS    |
| PD23562      | TRIM27 | cna | gain    | BASIS    |
| PD24186      | TRIM27 | cna | gain    | BASIS    |
| PD24206      | TRIM27 | cna | gain    | BASIS    |
| PD3905       | TRIM27 | cna | gain    | BASIS    |
| PD4006       | TRIM27 | cna | gain    | BASIS    |
| PD4107       | TRIM27 | cna | gain    | BASIS    |
| PD4826       | TRIM27 | cna | gain    | BASIS    |
| PD5935       | TRIM27 | cna | gain    | BASIS    |
| PD5945       | TRIM27 | cna | amp     | BASIS    |
| PD5948       | TRIM27 | cna | gain    | BASIS    |
| PD6731       | TRIM27 | cna | hetloss | BASIS    |
| PD7067       | TRIM27 | cna | amp     | BASIS    |
| PD7215       | TRIM27 | cna | gain    | BASIS    |
| PD8621       | TRIM27 | cna | amp     | BASIS    |
| PD9004       | TRIM27 | cna | gain    | BASIS    |
| PD9585       | TRIM27 | cna | gain    | BASIS    |
| PD9702       | TRIM27 | cna | gain    | BASIS    |
| TCGA-AN-A0XU | TRIM33 | cna | hetloss | TCGA     |
| TCGA-BH-A0AW | TRIM33 | cna | gain    | TCGA     |
| TCGA-BH-A0C0 | TRIM33 | cna | hetloss | TCGA     |
| TCGA-BH-A1FU | TRIM33 | cna | gain    | TCGA     |
| TCGA-E2-A1L7 | TRIM33 | cna | gain    | TCGA     |
| TCGA-LL-A5YP | TRIM33 | cna | gain    | TCGA     |
| MB-0346      | TRIM33 | cna | hetloss | METABRIC |
| MB-2827      | TRIM33 | cna | hetloss | METABRIC |
| MB-7032      | TRIM33 | cna | gain    | METABRIC |
| MB-7038      | TRIM33 | cna | gain    | METABRIC |
| PD11327      | TRIM33 | cna | gain    | BASIS    |
| PD11742      | TRIM33 | cna | hetloss | BASIS    |



|              |        |     |         |          |
|--------------|--------|-----|---------|----------|
| PD13296      | TRIM33 | cna | hetloss | BASIS    |
| PD13299      | TRIM33 | cna | gain    | BASIS    |
| PD22355      | TRIM33 | cna | hetloss | BASIS    |
| PD23574      | TRIM33 | cna | gain    | BASIS    |
| PD24186      | TRIM33 | cna | gain    | BASIS    |
| PD24206      | TRIM33 | cna | gain    | BASIS    |
| PD3905       | TRIM33 | cna | gain    | BASIS    |
| PD4006       | TRIM33 | cna | gain    | BASIS    |
| PD4107       | TRIM33 | cna | gain    | BASIS    |
| PD5930       | TRIM33 | cna | gain    | BASIS    |
| PD5945       | TRIM33 | cna | gain    | BASIS    |
| PD5948       | TRIM33 | cna | gain    | BASIS    |
| PD7067       | TRIM33 | cna | amp     | BASIS    |
| PD7215       | TRIM33 | cna | gain    | BASIS    |
| PD8621       | TRIM33 | cna | gain    | BASIS    |
| PD9585       | TRIM33 | cna | hetloss | BASIS    |
| PD9702       | TRIM33 | cna | gain    | BASIS    |
| TCGA-AN-A0XU | VTCN1  | cna | hetloss | TCGA     |
| TCGA-BH-A0AW | VTCN1  | cna | gain    | TCGA     |
| TCGA-BH-A0C0 | VTCN1  | cna | hetloss | TCGA     |
| TCGA-BH-A1FU | VTCN1  | cna | gain    | TCGA     |
| TCGA-C8-A12L | VTCN1  | cna | amp     | TCGA     |
| TCGA-E2-A1L7 | VTCN1  | cna | gain    | TCGA     |
| TCGA-LL-A5YP | VTCN1  | cna | gain    | TCGA     |
| MB-0346      | VTCN1  | cna | hetloss | METABRIC |
| MB-2827      | VTCN1  | cna | hetloss | METABRIC |
| MB-7032      | VTCN1  | cna | gain    | METABRIC |
| MB-7038      | VTCN1  | cna | gain    | METABRIC |
| PD11327      | VTCN1  | cna | gain    | BASIS    |
| PD13296      | VTCN1  | cna | hetloss | BASIS    |
| PD13299      | VTCN1  | cna | gain    | BASIS    |
| PD22355      | VTCN1  | cna | hetloss | BASIS    |
| PD23574      | VTCN1  | cna | gain    | BASIS    |
| PD24186      | VTCN1  | cna | gain    | BASIS    |
| PD24206      | VTCN1  | cna | gain    | BASIS    |
| PD3905       | VTCN1  | cna | gain    | BASIS    |
| PD4006       | VTCN1  | cna | gain    | BASIS    |
| PD4107       | VTCN1  | cna | gain    | BASIS    |
| PD5930       | VTCN1  | cna | gain    | BASIS    |
| PD5945       | VTCN1  | cna | gain    | BASIS    |
| PD5948       | VTCN1  | cna | gain    | BASIS    |
| PD7067       | VTCN1  | cna | amp     | BASIS    |
| PD7215       | VTCN1  | cna | gain    | BASIS    |
| PD8621       | VTCN1  | cna | gain    | BASIS    |
| PD9585       | VTCN1  | cna | hetloss | BASIS    |
| PD9702       | VTCN1  | cna | gain    | BASIS    |
| TCGA-A2-A25B | ARID5B | cna | hetloss | TCGA     |

|              |         |     |         |          |
|--------------|---------|-----|---------|----------|
| TCGA-AN-A0XU | ARID5B  | cna | hetloss | TCGA     |
| TCGA-AO-A0JL | ARID5B  | cna | gain    | TCGA     |
| TCGA-BH-A0C0 | ARID5B  | cna | gain    | TCGA     |
| TCGA-C8-A12L | ARID5B  | cna | gain    | TCGA     |
| TCGA-LL-A5YP | ARID5B  | cna | hetloss | TCGA     |
| MB-0346      | ARID5B  | cna | gain    | METABRIC |
| MB-5070      | ARID5B  | cna | gain    | METABRIC |
| MB-6098      | ARID5B  | cna | hetloss | METABRIC |
| MB-7038      | ARID5B  | cna | hetloss | METABRIC |
| PD11327      | ARID5B  | cna | amp     | BASIS    |
| PD11742      | ARID5B  | cna | hetloss | BASIS    |
| PD13299      | ARID5B  | cna | gain    | BASIS    |
| PD23574      | ARID5B  | cna | gain    | BASIS    |
| PD24186      | ARID5B  | cna | gain    | BASIS    |
| PD24206      | ARID5B  | cna | gain    | BASIS    |
| PD4005       | ARID5B  | cna | gain    | BASIS    |
| PD4006       | ARID5B  | cna | gain    | BASIS    |
| PD4107       | ARID5B  | cna | gain    | BASIS    |
| PD4826       | ARID5B  | cna | gain    | BASIS    |
| PD5930       | ARID5B  | cna | gain    | BASIS    |
| PD5945       | ARID5B  | cna | amp     | BASIS    |
| PD7067       | ARID5B  | cna | amp     | BASIS    |
| PD7215       | ARID5B  | cna | gain    | BASIS    |
| PD8621       | ARID5B  | cna | gain    | BASIS    |
| PD8980       | ARID5B  | cna | hetloss | BASIS    |
| PD9585       | ARID5B  | cna | hetloss | BASIS    |
| PD9702       | ARID5B  | cna | gain    | BASIS    |
| TCGA-AN-A0XU | BCL2L11 | cna | hetloss | TCGA     |
| TCGA-AO-A0JL | BCL2L11 | cna | gain    | TCGA     |
| TCGA-D8-A27M | BCL2L11 | cna | gain    | TCGA     |
| TCGA-LL-A5YP | BCL2L11 | cna | gain    | TCGA     |
| MB-5465      | BCL2L11 | cna | hetloss | METABRIC |
| MB-6060      | BCL2L11 | cna | gain    | METABRIC |
| MB-6271      | BCL2L11 | cna | hetloss | METABRIC |
| PD11327      | BCL2L11 | cna | gain    | BASIS    |
| PD13297      | BCL2L11 | cna | homdel  | BASIS    |
| PD13299      | BCL2L11 | cna | gain    | BASIS    |
| PD23578      | BCL2L11 | cna | hetloss | BASIS    |
| PD24186      | BCL2L11 | cna | gain    | BASIS    |
| PD24202      | BCL2L11 | cna | hetloss | BASIS    |
| PD24206      | BCL2L11 | cna | gain    | BASIS    |
| PD3905       | BCL2L11 | cna | gain    | BASIS    |
| PD4005       | BCL2L11 | cna | hetloss | BASIS    |
| PD4107       | BCL2L11 | cna | gain    | BASIS    |
| PD4967       | BCL2L11 | cna | hetloss | BASIS    |
| PD5945       | BCL2L11 | cna | gain    | BASIS    |
| PD5948       | BCL2L11 | cna | gain    | BASIS    |

|              |         |     |         |          |
|--------------|---------|-----|---------|----------|
| PD6413       | BCL2L11 | cna | hetloss | BASIS    |
| PD7067       | BCL2L11 | cna | gain    | BASIS    |
| PD7215       | BCL2L11 | cna | gain    | BASIS    |
| PD8621       | BCL2L11 | cna | gain    | BASIS    |
| PD8980       | BCL2L11 | cna | hetloss | BASIS    |
| PD9004       | BCL2L11 | cna | gain    | BASIS    |
| PD9585       | BCL2L11 | cna | hetloss | BASIS    |
| PD9702       | BCL2L11 | cna | gain    | BASIS    |
| TCGA-A2-A25B | CAD     | cna | hetloss | TCGA     |
| TCGA-AN-A0XU | CAD     | cna | gain    | TCGA     |
| TCGA-BH-A0AW | CAD     | cna | gain    | TCGA     |
| TCGA-BH-A0C0 | CAD     | cna | gain    | TCGA     |
| TCGA-C8-A12L | CAD     | cna | gain    | TCGA     |
| TCGA-D8-A27M | CAD     | cna | gain    | TCGA     |
| TCGA-LL-A5YP | CAD     | cna | gain    | TCGA     |
| MB-0346      | CAD     | cna | gain    | METABRIC |
| MB-5465      | CAD     | cna | amp     | METABRIC |
| MB-6271      | CAD     | cna | hetloss | METABRIC |
| MB-7038      | CAD     | cna | gain    | METABRIC |
| PD10014      | CAD     | cna | gain    | BASIS    |
| PD11327      | CAD     | cna | gain    | BASIS    |
| PD13299      | CAD     | cna | gain    | BASIS    |
| PD23562      | CAD     | cna | gain    | BASIS    |
| PD24186      | CAD     | cna | gain    | BASIS    |
| PD3890       | CAD     | cna | hetloss | BASIS    |
| PD3905       | CAD     | cna | gain    | BASIS    |
| PD4006       | CAD     | cna | gain    | BASIS    |
| PD4826       | CAD     | cna | hetloss | BASIS    |
| PD5930       | CAD     | cna | gain    | BASIS    |
| PD5935       | CAD     | cna | gain    | BASIS    |
| PD5945       | CAD     | cna | gain    | BASIS    |
| PD5948       | CAD     | cna | gain    | BASIS    |
| PD6406       | CAD     | cna | hetloss | BASIS    |
| PD7067       | CAD     | cna | gain    | BASIS    |
| PD9004       | CAD     | cna | gain    | BASIS    |
| PD9702       | CAD     | cna | gain    | BASIS    |
| TCGA-A2-A25B | CCDC6   | cna | hetloss | TCGA     |
| TCGA-AN-A0XU | CCDC6   | cna | hetloss | TCGA     |
| TCGA-AO-A0JL | CCDC6   | cna | hetloss | TCGA     |
| TCGA-BH-A0C0 | CCDC6   | cna | gain    | TCGA     |
| TCGA-C8-A12L | CCDC6   | cna | gain    | TCGA     |
| TCGA-LL-A5YP | CCDC6   | cna | hetloss | TCGA     |
| MB-0346      | CCDC6   | cna | gain    | METABRIC |
| MB-5070      | CCDC6   | cna | gain    | METABRIC |
| MB-6098      | CCDC6   | cna | hetloss | METABRIC |
| MB-7038      | CCDC6   | cna | hetloss | METABRIC |
| PD11327      | CCDC6   | cna | amp     | BASIS    |

|              |        |     |         |          |
|--------------|--------|-----|---------|----------|
| PD11742      | CCDC6  | cna | hetloss | BASIS    |
| PD13296      | CCDC6  | cna | gain    | BASIS    |
| PD13299      | CCDC6  | cna | gain    | BASIS    |
| PD24186      | CCDC6  | cna | gain    | BASIS    |
| PD24206      | CCDC6  | cna | gain    | BASIS    |
| PD4005       | CCDC6  | cna | gain    | BASIS    |
| PD4006       | CCDC6  | cna | gain    | BASIS    |
| PD4107       | CCDC6  | cna | gain    | BASIS    |
| PD4826       | CCDC6  | cna | gain    | BASIS    |
| PD5930       | CCDC6  | cna | gain    | BASIS    |
| PD5945       | CCDC6  | cna | gain    | BASIS    |
| PD7067       | CCDC6  | cna | amp     | BASIS    |
| PD7215       | CCDC6  | cna | gain    | BASIS    |
| PD8621       | CCDC6  | cna | gain    | BASIS    |
| PD8980       | CCDC6  | cna | hetloss | BASIS    |
| PD9585       | CCDC6  | cna | hetloss | BASIS    |
| PD9702       | CCDC6  | cna | gain    | BASIS    |
| TCGA-A2-A25B | CLTCL1 | cna | hetloss | TCGA     |
| TCGA-BH-A0C0 | CLTCL1 | cna | gain    | TCGA     |
| TCGA-BH-A1FU | CLTCL1 | cna | gain    | TCGA     |
| TCGA-C8-A12L | CLTCL1 | cna | hetloss | TCGA     |
| TCGA-E9-A1NC | CLTCL1 | cna | gain    | TCGA     |
| TCGA-LL-A5YP | CLTCL1 | cna | gain    | TCGA     |
| MB-0346      | CLTCL1 | cna | gain    | METABRIC |
| MB-6098      | CLTCL1 | cna | hetloss | METABRIC |
| PD11327      | CLTCL1 | cna | gain    | BASIS    |
| PD11742      | CLTCL1 | cna | hetloss | BASIS    |
| PD13296      | CLTCL1 | cna | gain    | BASIS    |
| PD14442      | CLTCL1 | cna | hetloss | BASIS    |
| PD23578      | CLTCL1 | cna | hetloss | BASIS    |
| PD3890       | CLTCL1 | cna | hetloss | BASIS    |
| PD3905       | CLTCL1 | cna | gain    | BASIS    |
| PD4005       | CLTCL1 | cna | gain    | BASIS    |
| PD4006       | CLTCL1 | cna | gain    | BASIS    |
| PD4826       | CLTCL1 | cna | gain    | BASIS    |
| PD4967       | CLTCL1 | cna | hetloss | BASIS    |
| PD5930       | CLTCL1 | cna | gain    | BASIS    |
| PD5935       | CLTCL1 | cna | gain    | BASIS    |
| PD5945       | CLTCL1 | cna | amp     | BASIS    |
| PD5948       | CLTCL1 | cna | gain    | BASIS    |
| PD6406       | CLTCL1 | cna | hetloss | BASIS    |
| PD7067       | CLTCL1 | cna | gain    | BASIS    |
| PD8621       | CLTCL1 | cna | gain    | BASIS    |
| PD9004       | CLTCL1 | cna | gain    | BASIS    |
| PD9702       | CLTCL1 | cna | gain    | BASIS    |
| TCGA-AN-A0XU | DUSP2  | cna | gain    | TCGA     |
| TCGA-AO-A0JL | DUSP2  | cna | gain    | TCGA     |

|              |       |     |         |          |
|--------------|-------|-----|---------|----------|
| TCGA-BH-A0AW | DUSP2 | cna | amp     | TCGA     |
| TCGA-BH-A0C0 | DUSP2 | cna | gain    | TCGA     |
| TCGA-D8-A27M | DUSP2 | cna | gain    | TCGA     |
| TCGA-LL-A5YP | DUSP2 | cna | gain    | TCGA     |
| MB-6060      | DUSP2 | cna | gain    | METABRIC |
| MB-6098      | DUSP2 | cna | gain    | METABRIC |
| MB-6271      | DUSP2 | cna | hetloss | METABRIC |
| PD13297      | DUSP2 | cna | gain    | BASIS    |
| PD13299      | DUSP2 | cna | gain    | BASIS    |
| PD23562      | DUSP2 | cna | amp     | BASIS    |
| PD23578      | DUSP2 | cna | gain    | BASIS    |
| PD24186      | DUSP2 | cna | gain    | BASIS    |
| PD24206      | DUSP2 | cna | gain    | BASIS    |
| PD3905       | DUSP2 | cna | gain    | BASIS    |
| PD4005       | DUSP2 | cna | hetloss | BASIS    |
| PD4006       | DUSP2 | cna | gain    | BASIS    |
| PD4107       | DUSP2 | cna | gain    | BASIS    |
| PD4967       | DUSP2 | cna | hetloss | BASIS    |
| PD5930       | DUSP2 | cna | gain    | BASIS    |
| PD5945       | DUSP2 | cna | amp     | BASIS    |
| PD5948       | DUSP2 | cna | gain    | BASIS    |
| PD7067       | DUSP2 | cna | amp     | BASIS    |
| PD7215       | DUSP2 | cna | gain    | BASIS    |
| PD8621       | DUSP2 | cna | gain    | BASIS    |
| PD9004       | DUSP2 | cna | gain    | BASIS    |
| PD9702       | DUSP2 | cna | gain    | BASIS    |
| TCGA-A2-A25B | ELN   | cna | hetloss | TCGA     |
| TCGA-AN-A0XU | ELN   | cna | hetloss | TCGA     |
| TCGA-AO-A0JL | ELN   | cna | gain    | TCGA     |
| TCGA-BH-A0AW | ELN   | cna | gain    | TCGA     |
| TCGA-C8-A12L | ELN   | cna | hetloss | TCGA     |
| TCGA-D8-A27M | ELN   | cna | gain    | TCGA     |
| MB-0346      | ELN   | cna | gain    | METABRIC |
| MB-2827      | ELN   | cna | hetloss | METABRIC |
| MB-7048      | ELN   | cna | hetloss | METABRIC |
| PD11327      | ELN   | cna | hetloss | BASIS    |
| PD13296      | ELN   | cna | hetloss | BASIS    |
| PD23562      | ELN   | cna | gain    | BASIS    |
| PD23574      | ELN   | cna | gain    | BASIS    |
| PD24186      | ELN   | cna | gain    | BASIS    |
| PD24206      | ELN   | cna | homdel  | BASIS    |
| PD3890       | ELN   | cna | hetloss | BASIS    |
| PD3905       | ELN   | cna | gain    | BASIS    |
| PD4006       | ELN   | cna | gain    | BASIS    |
| PD4107       | ELN   | cna | gain    | BASIS    |
| PD4826       | ELN   | cna | gain    | BASIS    |
| PD4967       | ELN   | cna | hetloss | BASIS    |

|              |      |     |         |          |
|--------------|------|-----|---------|----------|
| PD5930       | ELN  | cna | gain    | BASIS    |
| PD5935       | ELN  | cna | gain    | BASIS    |
| PD5945       | ELN  | cna | amp     | BASIS    |
| PD5948       | ELN  | cna | gain    | BASIS    |
| PD7215       | ELN  | cna | gain    | BASIS    |
| PD9004       | ELN  | cna | gain    | BASIS    |
| PD9702       | ELN  | cna | gain    | BASIS    |
| TCGA-AN-A0XU | FUS  | cna | gain    | TCGA     |
| TCGA-AO-A0JL | FUS  | cna | gain    | TCGA     |
| TCGA-BH-A0AW | FUS  | cna | gain    | TCGA     |
| TCGA-BH-A0C0 | FUS  | cna | gain    | TCGA     |
| TCGA-C8-A12L | FUS  | cna | gain    | TCGA     |
| TCGA-E2-A1L7 | FUS  | cna | hetloss | TCGA     |
| TCGA-LL-A5YP | FUS  | cna | gain    | TCGA     |
| MB-0346      | FUS  | cna | gain    | METABRIC |
| MB-6271      | FUS  | cna | gain    | METABRIC |
| MB-7032      | FUS  | cna | gain    | METABRIC |
| MB-7048      | FUS  | cna | hetloss | METABRIC |
| MB-0420      | FUS  | cna | hetloss | METABRIC |
| PD11327      | FUS  | cna | hetloss | BASIS    |
| PD13299      | FUS  | cna | gain    | BASIS    |
| PD24186      | FUS  | cna | gain    | BASIS    |
| PD24202      | FUS  | cna | hetloss | BASIS    |
| PD3905       | FUS  | cna | gain    | BASIS    |
| PD4006       | FUS  | cna | gain    | BASIS    |
| PD4107       | FUS  | cna | gain    | BASIS    |
| PD4826       | FUS  | cna | gain    | BASIS    |
| PD5930       | FUS  | cna | gain    | BASIS    |
| PD5935       | FUS  | cna | gain    | BASIS    |
| PD5945       | FUS  | cna | amp     | BASIS    |
| PD5948       | FUS  | cna | gain    | BASIS    |
| PD7067       | FUS  | cna | gain    | BASIS    |
| PD7215       | FUS  | cna | amp     | BASIS    |
| PD8980       | FUS  | cna | gain    | BASIS    |
| PD9004       | FUS  | cna | gain    | BASIS    |
| TCGA-A2-A25B | HIP1 | cna | hetloss | TCGA     |
| TCGA-AN-A0XU | HIP1 | cna | hetloss | TCGA     |
| TCGA-AO-A0JL | HIP1 | cna | gain    | TCGA     |
| TCGA-BH-A0AW | HIP1 | cna | gain    | TCGA     |
| TCGA-C8-A12L | HIP1 | cna | hetloss | TCGA     |
| TCGA-D8-A27M | HIP1 | cna | gain    | TCGA     |
| MB-0346      | HIP1 | cna | hetloss | METABRIC |
| MB-2827      | HIP1 | cna | hetloss | METABRIC |
| MB-7048      | HIP1 | cna | hetloss | METABRIC |
| PD11327      | HIP1 | cna | hetloss | BASIS    |
| PD13296      | HIP1 | cna | hetloss | BASIS    |
| PD23562      | HIP1 | cna | gain    | BASIS    |

|              |        |     |         |          |
|--------------|--------|-----|---------|----------|
| PD23574      | HIP1   | cna | gain    | BASIS    |
| PD24186      | HIP1   | cna | amp     | BASIS    |
| PD24206      | HIP1   | cna | hetloss | BASIS    |
| PD3890       | HIP1   | cna | hetloss | BASIS    |
| PD3905       | HIP1   | cna | gain    | BASIS    |
| PD4006       | HIP1   | cna | gain    | BASIS    |
| PD4107       | HIP1   | cna | gain    | BASIS    |
| PD4826       | HIP1   | cna | gain    | BASIS    |
| PD4967       | HIP1   | cna | hetloss | BASIS    |
| PD5930       | HIP1   | cna | gain    | BASIS    |
| PD5935       | HIP1   | cna | gain    | BASIS    |
| PD5945       | HIP1   | cna | amp     | BASIS    |
| PD5948       | HIP1   | cna | gain    | BASIS    |
| PD7215       | HIP1   | cna | gain    | BASIS    |
| PD9004       | HIP1   | cna | gain    | BASIS    |
| PD9702       | HIP1   | cna | gain    | BASIS    |
| TCGA-A2-A25B | HOXA11 | cna | gain    | TCGA     |
| TCGA-BH-A0AW | HOXA11 | cna | gain    | TCGA     |
| TCGA-BH-A0C0 | HOXA11 | cna | hetloss | TCGA     |
| TCGA-C8-A12L | HOXA11 | cna | gain    | TCGA     |
| TCGA-D8-A27M | HOXA11 | cna | hetloss | TCGA     |
| TCGA-LL-A5YP | HOXA11 | cna | hetloss | TCGA     |
| MB-0346      | HOXA11 | cna | gain    | METABRIC |
| MB-6098      | HOXA11 | cna | hetloss | METABRIC |
| MB-0420      | HOXA11 | cna | hetloss | METABRIC |
| PD10014      | HOXA11 | cna | hetloss | BASIS    |
| PD11327      | HOXA11 | cna | gain    | BASIS    |
| PD13296      | HOXA11 | cna | gain    | BASIS    |
| PD13297      | HOXA11 | cna | hetloss | BASIS    |
| PD23578      | HOXA11 | cna | hetloss | BASIS    |
| PD24186      | HOXA11 | cna | gain    | BASIS    |
| PD24206      | HOXA11 | cna | gain    | BASIS    |
| PD24337      | HOXA11 | cna | hetloss | BASIS    |
| PD3905       | HOXA11 | cna | gain    | BASIS    |
| PD4006       | HOXA11 | cna | gain    | BASIS    |
| PD4107       | HOXA11 | cna | amp     | BASIS    |
| PD4826       | HOXA11 | cna | gain    | BASIS    |
| PD5945       | HOXA11 | cna | amp     | BASIS    |
| PD6406       | HOXA11 | cna | hetloss | BASIS    |
| PD6413       | HOXA11 | cna | gain    | BASIS    |
| PD7215       | HOXA11 | cna | gain    | BASIS    |
| PD8621       | HOXA11 | cna | gain    | BASIS    |
| PD9585       | HOXA11 | cna | gain    | BASIS    |
| PD9702       | HOXA11 | cna | gain    | BASIS    |
| TCGA-A2-A25B | HOXA13 | cna | gain    | TCGA     |
| TCGA-BH-A0AW | HOXA13 | cna | gain    | TCGA     |
| TCGA-BH-A0C0 | HOXA13 | cna | hetloss | TCGA     |

|              |        |     |         |          |
|--------------|--------|-----|---------|----------|
| TCGA-C8-A12L | HOXA13 | cna | gain    | TCGA     |
| TCGA-D8-A27M | HOXA13 | cna | hetloss | TCGA     |
| TCGA-LL-A5YP | HOXA13 | cna | hetloss | TCGA     |
| MB-0346      | HOXA13 | cna | gain    | METABRIC |
| MB-6098      | HOXA13 | cna | hetloss | METABRIC |
| MB-0420      | HOXA13 | cna | hetloss | METABRIC |
| PD10014      | HOXA13 | cna | hetloss | BASIS    |
| PD11327      | HOXA13 | cna | gain    | BASIS    |
| PD13296      | HOXA13 | cna | gain    | BASIS    |
| PD13297      | HOXA13 | cna | hetloss | BASIS    |
| PD23578      | HOXA13 | cna | hetloss | BASIS    |
| PD24186      | HOXA13 | cna | gain    | BASIS    |
| PD24206      | HOXA13 | cna | gain    | BASIS    |
| PD24337      | HOXA13 | cna | hetloss | BASIS    |
| PD3905       | HOXA13 | cna | gain    | BASIS    |
| PD4006       | HOXA13 | cna | gain    | BASIS    |
| PD4107       | HOXA13 | cna | amp     | BASIS    |
| PD4826       | HOXA13 | cna | gain    | BASIS    |
| PD5945       | HOXA13 | cna | amp     | BASIS    |
| PD6406       | HOXA13 | cna | hetloss | BASIS    |
| PD6413       | HOXA13 | cna | gain    | BASIS    |
| PD7215       | HOXA13 | cna | gain    | BASIS    |
| PD8621       | HOXA13 | cna | gain    | BASIS    |
| PD9585       | HOXA13 | cna | gain    | BASIS    |
| PD9702       | HOXA13 | cna | gain    | BASIS    |
| TCGA-A2-A25B | HOXA9  | cna | gain    | TCGA     |
| TCGA-BH-A0AW | HOXA9  | cna | gain    | TCGA     |
| TCGA-BH-A0C0 | HOXA9  | cna | hetloss | TCGA     |
| TCGA-C8-A12L | HOXA9  | cna | gain    | TCGA     |
| TCGA-D8-A27M | HOXA9  | cna | hetloss | TCGA     |
| TCGA-LL-A5YP | HOXA9  | cna | hetloss | TCGA     |
| MB-0346      | HOXA9  | cna | gain    | METABRIC |
| MB-6098      | HOXA9  | cna | hetloss | METABRIC |
| MB-0420      | HOXA9  | cna | hetloss | METABRIC |
| PD10014      | HOXA9  | cna | hetloss | BASIS    |
| PD11327      | HOXA9  | cna | gain    | BASIS    |
| PD13296      | HOXA9  | cna | gain    | BASIS    |
| PD13297      | HOXA9  | cna | hetloss | BASIS    |
| PD23578      | HOXA9  | cna | hetloss | BASIS    |
| PD24186      | HOXA9  | cna | gain    | BASIS    |
| PD24206      | HOXA9  | cna | gain    | BASIS    |
| PD24337      | HOXA9  | cna | hetloss | BASIS    |
| PD3905       | HOXA9  | cna | gain    | BASIS    |
| PD4006       | HOXA9  | cna | gain    | BASIS    |
| PD4107       | HOXA9  | cna | amp     | BASIS    |
| PD4826       | HOXA9  | cna | gain    | BASIS    |
| PD5945       | HOXA9  | cna | amp     | BASIS    |



|              |       |     |         |          |
|--------------|-------|-----|---------|----------|
| PD6406       | HOXA9 | cna | hetloss | BASIS    |
| PD6413       | HOXA9 | cna | gain    | BASIS    |
| PD7215       | HOXA9 | cna | gain    | BASIS    |
| PD8621       | HOXA9 | cna | gain    | BASIS    |
| PD9585       | HOXA9 | cna | gain    | BASIS    |
| PD9702       | HOXA9 | cna | gain    | BASIS    |
| TCGA-A2-A25B | MAGI2 | cna | hetloss | TCGA     |
| TCGA-AN-A0XU | MAGI2 | cna | hetloss | TCGA     |
| TCGA-AO-A0JL | MAGI2 | cna | gain    | TCGA     |
| TCGA-BH-A0AW | MAGI2 | cna | gain    | TCGA     |
| TCGA-C8-A12L | MAGI2 | cna | hetloss | TCGA     |
| TCGA-D8-A27M | MAGI2 | cna | gain    | TCGA     |
| TCGA-E9-A1NC | MAGI2 | cna | amp     | TCGA     |
| MB-0346      | MAGI2 | cna | hetloss | METABRIC |
| MB-2827      | MAGI2 | cna | hetloss | METABRIC |
| MB-7048      | MAGI2 | cna | hetloss | METABRIC |
| PD11327      | MAGI2 | cna | amp     | BASIS    |
| PD13296      | MAGI2 | cna | hetloss | BASIS    |
| PD23562      | MAGI2 | cna | gain    | BASIS    |
| PD23574      | MAGI2 | cna | gain    | BASIS    |
| PD24186      | MAGI2 | cna | amp     | BASIS    |
| PD3890       | MAGI2 | cna | hetloss | BASIS    |
| PD3905       | MAGI2 | cna | gain    | BASIS    |
| PD4006       | MAGI2 | cna | gain    | BASIS    |
| PD4107       | MAGI2 | cna | gain    | BASIS    |
| PD4826       | MAGI2 | cna | gain    | BASIS    |
| PD5930       | MAGI2 | cna | gain    | BASIS    |
| PD5935       | MAGI2 | cna | gain    | BASIS    |
| PD5945       | MAGI2 | cna | amp     | BASIS    |
| PD5948       | MAGI2 | cna | gain    | BASIS    |
| PD6406       | MAGI2 | cna | hetloss | BASIS    |
| PD7215       | MAGI2 | cna | gain    | BASIS    |
| PD9004       | MAGI2 | cna | gain    | BASIS    |
| PD9702       | MAGI2 | cna | gain    | BASIS    |
| TCGA-A2-A25B | NOD1  | cna | gain    | TCGA     |
| TCGA-AO-A0JL | NOD1  | cna | gain    | TCGA     |
| TCGA-BH-A0AW | NOD1  | cna | gain    | TCGA     |
| TCGA-BH-A0C0 | NOD1  | cna | hetloss | TCGA     |
| TCGA-C8-A12L | NOD1  | cna | gain    | TCGA     |
| TCGA-D8-A27M | NOD1  | cna | hetloss | TCGA     |
| TCGA-LL-A5YP | NOD1  | cna | hetloss | TCGA     |
| MB-0346      | NOD1  | cna | gain    | METABRIC |
| MB-6098      | NOD1  | cna | hetloss | METABRIC |
| MB-0420      | NOD1  | cna | hetloss | METABRIC |
| PD10014      | NOD1  | cna | hetloss | BASIS    |
| PD11327      | NOD1  | cna | gain    | BASIS    |
| PD13297      | NOD1  | cna | hetloss | BASIS    |

|              |       |     |         |          |
|--------------|-------|-----|---------|----------|
| PD23578      | NOD1  | cna | hetloss | BASIS    |
| PD24186      | NOD1  | cna | gain    | BASIS    |
| PD24206      | NOD1  | cna | gain    | BASIS    |
| PD24337      | NOD1  | cna | hetloss | BASIS    |
| PD3905       | NOD1  | cna | gain    | BASIS    |
| PD4006       | NOD1  | cna | gain    | BASIS    |
| PD4107       | NOD1  | cna | amp     | BASIS    |
| PD4826       | NOD1  | cna | gain    | BASIS    |
| PD5945       | NOD1  | cna | amp     | BASIS    |
| PD6406       | NOD1  | cna | hetloss | BASIS    |
| PD6413       | NOD1  | cna | gain    | BASIS    |
| PD7215       | NOD1  | cna | gain    | BASIS    |
| PD8621       | NOD1  | cna | gain    | BASIS    |
| PD9585       | NOD1  | cna | gain    | BASIS    |
| PD9702       | NOD1  | cna | gain    | BASIS    |
| TCGA-A2-A25B | OLIG2 | cna | hetloss | TCGA     |
| TCGA-BH-A0C0 | OLIG2 | cna | hetloss | TCGA     |
| TCGA-BH-A1FU | OLIG2 | cna | gain    | TCGA     |
| TCGA-D8-A27M | OLIG2 | cna | hetloss | TCGA     |
| TCGA-LL-A5YP | OLIG2 | cna | gain    | TCGA     |
| MB-0346      | OLIG2 | cna | gain    | METABRIC |
| MB-7048      | OLIG2 | cna | hetloss | METABRIC |
| PD11742      | OLIG2 | cna | hetloss | BASIS    |
| PD13296      | OLIG2 | cna | gain    | BASIS    |
| PD13297      | OLIG2 | cna | hetloss | BASIS    |
| PD23562      | OLIG2 | cna | gain    | BASIS    |
| PD23578      | OLIG2 | cna | gain    | BASIS    |
| PD24186      | OLIG2 | cna | gain    | BASIS    |
| PD24202      | OLIG2 | cna | gain    | BASIS    |
| PD24206      | OLIG2 | cna | hetloss | BASIS    |
| PD3905       | OLIG2 | cna | gain    | BASIS    |
| PD4107       | OLIG2 | cna | gain    | BASIS    |
| PD4826       | OLIG2 | cna | gain    | BASIS    |
| PD5930       | OLIG2 | cna | gain    | BASIS    |
| PD5945       | OLIG2 | cna | gain    | BASIS    |
| PD5948       | OLIG2 | cna | gain    | BASIS    |
| PD6731       | OLIG2 | cna | gain    | BASIS    |
| PD7067       | OLIG2 | cna | gain    | BASIS    |
| PD7215       | OLIG2 | cna | gain    | BASIS    |
| PD8621       | OLIG2 | cna | gain    | BASIS    |
| PD8980       | OLIG2 | cna | hetloss | BASIS    |
| PD9004       | OLIG2 | cna | amp     | BASIS    |
| PD9702       | OLIG2 | cna | gain    | BASIS    |
| TCGA-AN-A0XU | PRSS8 | cna | gain    | TCGA     |
| TCGA-AO-A0JL | PRSS8 | cna | gain    | TCGA     |
| TCGA-BH-A0AW | PRSS8 | cna | gain    | TCGA     |
| TCGA-BH-A0C0 | PRSS8 | cna | gain    | TCGA     |

|              |         |     |         |          |
|--------------|---------|-----|---------|----------|
| TCGA-C8-A12L | PRSS8   | cna | gain    | TCGA     |
| TCGA-E2-A1L7 | PRSS8   | cna | hetloss | TCGA     |
| TCGA-LL-A5YP | PRSS8   | cna | gain    | TCGA     |
| MB-0346      | PRSS8   | cna | gain    | METABRIC |
| MB-6271      | PRSS8   | cna | gain    | METABRIC |
| MB-7032      | PRSS8   | cna | gain    | METABRIC |
| MB-7048      | PRSS8   | cna | hetloss | METABRIC |
| MB-0420      | PRSS8   | cna | hetloss | METABRIC |
| PD11327      | PRSS8   | cna | hetloss | BASIS    |
| PD13299      | PRSS8   | cna | gain    | BASIS    |
| PD24186      | PRSS8   | cna | gain    | BASIS    |
| PD24202      | PRSS8   | cna | hetloss | BASIS    |
| PD3905       | PRSS8   | cna | gain    | BASIS    |
| PD4006       | PRSS8   | cna | gain    | BASIS    |
| PD4107       | PRSS8   | cna | gain    | BASIS    |
| PD4826       | PRSS8   | cna | gain    | BASIS    |
| PD5930       | PRSS8   | cna | gain    | BASIS    |
| PD5935       | PRSS8   | cna | gain    | BASIS    |
| PD5945       | PRSS8   | cna | amp     | BASIS    |
| PD5948       | PRSS8   | cna | gain    | BASIS    |
| PD7067       | PRSS8   | cna | gain    | BASIS    |
| PD7215       | PRSS8   | cna | amp     | BASIS    |
| PD8980       | PRSS8   | cna | gain    | BASIS    |
| PD9004       | PRSS8   | cna | gain    | BASIS    |
| TCGA-A2-A25B | RPS6KA4 | cna | hetloss | TCGA     |
| TCGA-AN-A0XU | RPS6KA4 | cna | hetloss | TCGA     |
| TCGA-AO-A0JL | RPS6KA4 | cna | hetloss | TCGA     |
| TCGA-BH-A18R | RPS6KA4 | cna | homdel  | TCGA     |
| TCGA-LL-A5YP | RPS6KA4 | cna | hetloss | TCGA     |
| MB-0346      | RPS6KA4 | cna | gain    | METABRIC |
| MB-6060      | RPS6KA4 | cna | gain    | METABRIC |
| MB-6098      | RPS6KA4 | cna | hetloss | METABRIC |
| MB-6271      | RPS6KA4 | cna | hetloss | METABRIC |
| PD11327      | RPS6KA4 | cna | hetloss | BASIS    |
| PD13296      | RPS6KA4 | cna | hetloss | BASIS    |
| PD13771      | RPS6KA4 | cna | hetloss | BASIS    |
| PD24186      | RPS6KA4 | cna | gain    | BASIS    |
| PD24206      | RPS6KA4 | cna | gain    | BASIS    |
| PD3905       | RPS6KA4 | cna | gain    | BASIS    |
| PD4006       | RPS6KA4 | cna | gain    | BASIS    |
| PD4107       | RPS6KA4 | cna | gain    | BASIS    |
| PD4826       | RPS6KA4 | cna | gain    | BASIS    |
| PD5930       | RPS6KA4 | cna | gain    | BASIS    |
| PD5935       | RPS6KA4 | cna | gain    | BASIS    |
| PD5945       | RPS6KA4 | cna | amp     | BASIS    |
| PD5948       | RPS6KA4 | cna | gain    | BASIS    |
| PD6413       | RPS6KA4 | cna | gain    | BASIS    |

|              |         |     |         |          |
|--------------|---------|-----|---------|----------|
| PD7067       | RPS6KA4 | cna | gain    | BASIS    |
| PD7215       | RPS6KA4 | cna | gain    | BASIS    |
| PD8621       | RPS6KA4 | cna | gain    | BASIS    |
| PD8980       | RPS6KA4 | cna | hetloss | BASIS    |
| PD9702       | RPS6KA4 | cna | gain    | BASIS    |
| TCGA-AN-A0XU | SRSF3   | cna | hetloss | TCGA     |
| TCGA-AO-A0JL | SRSF3   | cna | gain    | TCGA     |
| TCGA-BH-A0AW | SRSF3   | cna | gain    | TCGA     |
| TCGA-BH-A0C0 | SRSF3   | cna | hetloss | TCGA     |
| TCGA-C8-A12L | SRSF3   | cna | hetloss | TCGA     |
| TCGA-E2-A1L7 | SRSF3   | cna | hetloss | TCGA     |
| TCGA-E9-A1NC | SRSF3   | cna | amp     | TCGA     |
| MB-7032      | SRSF3   | cna | gain    | METABRIC |
| PD11327      | SRSF3   | cna | hetloss | BASIS    |
| PD13296      | SRSF3   | cna | hetloss | BASIS    |
| PD13299      | SRSF3   | cna | gain    | BASIS    |
| PD23562      | SRSF3   | cna | gain    | BASIS    |
| PD24186      | SRSF3   | cna | gain    | BASIS    |
| PD24206      | SRSF3   | cna | gain    | BASIS    |
| PD3905       | SRSF3   | cna | gain    | BASIS    |
| PD4006       | SRSF3   | cna | gain    | BASIS    |
| PD4107       | SRSF3   | cna | gain    | BASIS    |
| PD4826       | SRSF3   | cna | gain    | BASIS    |
| PD5935       | SRSF3   | cna | gain    | BASIS    |
| PD5945       | SRSF3   | cna | amp     | BASIS    |
| PD5948       | SRSF3   | cna | gain    | BASIS    |
| PD6731       | SRSF3   | cna | hetloss | BASIS    |
| PD7067       | SRSF3   | cna | amp     | BASIS    |
| PD7215       | SRSF3   | cna | gain    | BASIS    |
| PD8621       | SRSF3   | cna | amp     | BASIS    |
| PD9004       | SRSF3   | cna | gain    | BASIS    |
| PD9585       | SRSF3   | cna | gain    | BASIS    |
| PD9702       | SRSF3   | cna | gain    | BASIS    |
| TCGA-AN-A0XU | TMEM127 | cna | gain    | TCGA     |
| TCGA-AO-A0JL | TMEM127 | cna | gain    | TCGA     |
| TCGA-BH-A0AW | TMEM127 | cna | amp     | TCGA     |
| TCGA-BH-A0C0 | TMEM127 | cna | gain    | TCGA     |
| TCGA-D8-A27M | TMEM127 | cna | gain    | TCGA     |
| TCGA-LL-A5YP | TMEM127 | cna | gain    | TCGA     |
| MB-6060      | TMEM127 | cna | gain    | METABRIC |
| MB-6098      | TMEM127 | cna | gain    | METABRIC |
| MB-6271      | TMEM127 | cna | hetloss | METABRIC |
| PD13297      | TMEM127 | cna | gain    | BASIS    |
| PD13299      | TMEM127 | cna | gain    | BASIS    |
| PD23562      | TMEM127 | cna | amp     | BASIS    |
| PD23578      | TMEM127 | cna | gain    | BASIS    |
| PD24186      | TMEM127 | cna | gain    | BASIS    |

|              |         |     |         |       |
|--------------|---------|-----|---------|-------|
| PD24206      | TMEM127 | cna | gain    | BASIS |
| PD3905       | TMEM127 | cna | gain    | BASIS |
| PD4005       | TMEM127 | cna | hetloss | BASIS |
| PD4006       | TMEM127 | cna | gain    | BASIS |
| PD4107       | TMEM127 | cna | gain    | BASIS |
| PD4967       | TMEM127 | cna | hetloss | BASIS |
| PD5930       | TMEM127 | cna | gain    | BASIS |
| PD5945       | TMEM127 | cna | amp     | BASIS |
| PD5948       | TMEM127 | cna | gain    | BASIS |
| PD7067       | TMEM127 | cna | amp     | BASIS |
| PD7215       | TMEM127 | cna | gain    | BASIS |
| PD8621       | TMEM127 | cna | gain    | BASIS |
| PD9004       | TMEM127 | cna | gain    | BASIS |
| PD9702       | TMEM127 | cna | gain    | BASIS |
| TCGA-A2-A25B | SEPT5   | cna | hetloss | TCGA  |
| TCGA-BH-A0C0 | SEPT5   | cna | gain    | TCGA  |
| TCGA-BH-A1FU | SEPT5   | cna | gain    | TCGA  |
| TCGA-C8-A12L | SEPT5   | cna | hetloss | TCGA  |
| TCGA-E9-A1NC | SEPT5   | cna | gain    | TCGA  |
| TCGA-LL-A5YP | SEPT5   | cna | gain    | TCGA  |
| PD11327      | SEPT5   | cna | gain    | BASIS |
| PD11742      | SEPT5   | cna | hetloss | BASIS |
| PD13296      | SEPT5   | cna | gain    | BASIS |
| PD14442      | SEPT5   | cna | hetloss | BASIS |
| PD23578      | SEPT5   | cna | hetloss | BASIS |
| PD3890       | SEPT5   | cna | hetloss | BASIS |
| PD3905       | SEPT5   | cna | gain    | BASIS |
| PD4005       | SEPT5   | cna | gain    | BASIS |
| PD4006       | SEPT5   | cna | gain    | BASIS |
| PD4107       | SEPT5   | cna | gain    | BASIS |
| PD4826       | SEPT5   | cna | gain    | BASIS |
| PD4967       | SEPT5   | cna | hetloss | BASIS |
| PD5930       | SEPT5   | cna | gain    | BASIS |
| PD5935       | SEPT5   | cna | gain    | BASIS |
| PD5945       | SEPT5   | cna | amp     | BASIS |
| PD5948       | SEPT5   | cna | gain    | BASIS |
| PD6406       | SEPT5   | cna | hetloss | BASIS |
| PD7067       | SEPT5   | cna | gain    | BASIS |
| PD8621       | SEPT5   | cna | gain    | BASIS |
| PD9004       | SEPT5   | cna | gain    | BASIS |
| PD9702       | SEPT5   | cna | gain    | BASIS |
| TCGA-A2-A25B | ABCB1   | cna | hetloss | TCGA  |
| TCGA-AN-A0XU | ABCB1   | cna | hetloss | TCGA  |
| TCGA-AO-A0JL | ABCB1   | cna | gain    | TCGA  |
| TCGA-BH-A0AW | ABCB1   | cna | gain    | TCGA  |
| TCGA-C8-A12L | ABCB1   | cna | hetloss | TCGA  |
| TCGA-D8-A27M | ABCB1   | cna | gain    | TCGA  |

|              |       |     |         |          |
|--------------|-------|-----|---------|----------|
| TCGA-E2-A1L7 | ABCB1 | cna | hetloss | TCGA     |
| TCGA-E9-A1NC | ABCB1 | cna | gain    | TCGA     |
| MB-0346      | ABCB1 | cna | hetloss | METABRIC |
| PD11327      | ABCB1 | cna | gain    | BASIS    |
| PD13296      | ABCB1 | cna | hetloss | BASIS    |
| PD23574      | ABCB1 | cna | gain    | BASIS    |
| PD24186      | ABCB1 | cna | amp     | BASIS    |
| PD3890       | ABCB1 | cna | hetloss | BASIS    |
| PD3905       | ABCB1 | cna | gain    | BASIS    |
| PD4006       | ABCB1 | cna | gain    | BASIS    |
| PD4107       | ABCB1 | cna | gain    | BASIS    |
| PD4826       | ABCB1 | cna | gain    | BASIS    |
| PD5930       | ABCB1 | cna | gain    | BASIS    |
| PD5935       | ABCB1 | cna | gain    | BASIS    |
| PD5945       | ABCB1 | cna | amp     | BASIS    |
| PD5948       | ABCB1 | cna | gain    | BASIS    |
| PD7067       | ABCB1 | cna | gain    | BASIS    |
| PD7215       | ABCB1 | cna | gain    | BASIS    |
| PD8621       | ABCB1 | cna | gain    | BASIS    |
| PD9004       | ABCB1 | cna | gain    | BASIS    |
| PD9702       | ABCB1 | cna | gain    | BASIS    |
| TCGA-A2-A25B | CD36  | cna | hetloss | TCGA     |
| TCGA-AN-A0XU | CD36  | cna | hetloss | TCGA     |
| TCGA-AO-A0JL | CD36  | cna | gain    | TCGA     |
| TCGA-BH-A0AW | CD36  | cna | gain    | TCGA     |
| TCGA-C8-A12L | CD36  | cna | hetloss | TCGA     |
| TCGA-D8-A27M | CD36  | cna | gain    | TCGA     |
| TCGA-E9-A1NC | CD36  | cna | gain    | TCGA     |
| MB-0346      | CD36  | cna | hetloss | METABRIC |
| MB-5465      | CD36  | cna | gain    | METABRIC |
| PD11327      | CD36  | cna | amp     | BASIS    |
| PD13296      | CD36  | cna | hetloss | BASIS    |
| PD23562      | CD36  | cna | gain    | BASIS    |
| PD23574      | CD36  | cna | gain    | BASIS    |
| PD24186      | CD36  | cna | amp     | BASIS    |
| PD3890       | CD36  | cna | hetloss | BASIS    |
| PD3905       | CD36  | cna | gain    | BASIS    |
| PD4006       | CD36  | cna | gain    | BASIS    |
| PD4107       | CD36  | cna | gain    | BASIS    |
| PD4826       | CD36  | cna | gain    | BASIS    |
| PD5930       | CD36  | cna | gain    | BASIS    |
| PD5935       | CD36  | cna | gain    | BASIS    |
| PD5945       | CD36  | cna | amp     | BASIS    |
| PD5948       | CD36  | cna | gain    | BASIS    |
| PD6406       | CD36  | cna | hetloss | BASIS    |
| PD7215       | CD36  | cna | gain    | BASIS    |
| PD9004       | CD36  | cna | gain    | BASIS    |

|              |      |     |         |          |
|--------------|------|-----|---------|----------|
| PD9702       | CD36 | cna | gain    | BASIS    |
| TCGA-A2-A25B | CLP1 | cna | gain    | TCGA     |
| TCGA-AN-A0XU | CLP1 | cna | hetloss | TCGA     |
| TCGA-AO-A0JL | CLP1 | cna | hetloss | TCGA     |
| TCGA-LL-A5YP | CLP1 | cna | gain    | TCGA     |
| MB-0346      | CLP1 | cna | gain    | METABRIC |
| MB-6060      | CLP1 | cna | gain    | METABRIC |
| MB-6098      | CLP1 | cna | hetloss | METABRIC |
| MB-6271      | CLP1 | cna | gain    | METABRIC |
| MB-0420      | CLP1 | cna | gain    | METABRIC |
| PD11327      | CLP1 | cna | homdel  | BASIS    |
| PD13296      | CLP1 | cna | gain    | BASIS    |
| PD13299      | CLP1 | cna | gain    | BASIS    |
| PD13771      | CLP1 | cna | hetloss | BASIS    |
| PD24186      | CLP1 | cna | gain    | BASIS    |
| PD24206      | CLP1 | cna | gain    | BASIS    |
| PD3905       | CLP1 | cna | gain    | BASIS    |
| PD4006       | CLP1 | cna | gain    | BASIS    |
| PD4107       | CLP1 | cna | amp     | BASIS    |
| PD4826       | CLP1 | cna | gain    | BASIS    |
| PD5935       | CLP1 | cna | gain    | BASIS    |
| PD5945       | CLP1 | cna | gain    | BASIS    |
| PD5948       | CLP1 | cna | gain    | BASIS    |
| PD6413       | CLP1 | cna | hetloss | BASIS    |
| PD7067       | CLP1 | cna | gain    | BASIS    |
| PD7215       | CLP1 | cna | gain    | BASIS    |
| PD8980       | CLP1 | cna | hetloss | BASIS    |
| PD9702       | CLP1 | cna | gain    | BASIS    |
| TCGA-A2-A25B | EGFR | cna | hetloss | TCGA     |
| TCGA-AN-A0XU | EGFR | cna | hetloss | TCGA     |
| TCGA-AO-A0JL | EGFR | cna | gain    | TCGA     |
| TCGA-BH-A0AW | EGFR | cna | gain    | TCGA     |
| TCGA-C8-A12L | EGFR | cna | gain    | TCGA     |
| TCGA-D8-A27M | EGFR | cna | gain    | TCGA     |
| TCGA-LL-A5YP | EGFR | cna | hetloss | TCGA     |
| MB-0346      | EGFR | cna | hetloss | METABRIC |
| MB-2827      | EGFR | cna | amp     | METABRIC |
| MB-6098      | EGFR | cna | hetloss | METABRIC |
| MB-0420      | EGFR | cna | hetloss | METABRIC |
| PD11327      | EGFR | cna | gain    | BASIS    |
| PD13299      | EGFR | cna | hetloss | BASIS    |
| PD23562      | EGFR | cna | gain    | BASIS    |
| PD24186      | EGFR | cna | gain    | BASIS    |
| PD24206      | EGFR | cna | gain    | BASIS    |
| PD3905       | EGFR | cna | gain    | BASIS    |
| PD4006       | EGFR | cna | gain    | BASIS    |
| PD4107       | EGFR | cna | gain    | BASIS    |

|              |       |     |         |          |
|--------------|-------|-----|---------|----------|
| PD4826       | EGFR  | cna | gain    | BASIS    |
| PD5930       | EGFR  | cna | gain    | BASIS    |
| PD5945       | EGFR  | cna | amp     | BASIS    |
| PD6406       | EGFR  | cna | hetloss | BASIS    |
| PD6413       | EGFR  | cna | gain    | BASIS    |
| PD7215       | EGFR  | cna | gain    | BASIS    |
| PD8621       | EGFR  | cna | gain    | BASIS    |
| PD9004       | EGFR  | cna | gain    | BASIS    |
| TCGA-AN-A0XU | FANCE | cna | hetloss | TCGA     |
| TCGA-AO-A0JL | FANCE | cna | gain    | TCGA     |
| TCGA-BH-A0AW | FANCE | cna | gain    | TCGA     |
| TCGA-BH-A0C0 | FANCE | cna | hetloss | TCGA     |
| TCGA-C8-A12L | FANCE | cna | hetloss | TCGA     |
| TCGA-E2-A1L7 | FANCE | cna | hetloss | TCGA     |
| TCGA-E9-A1NC | FANCE | cna | amp     | TCGA     |
| MB-7032      | FANCE | cna | gain    | METABRIC |
| PD11327      | FANCE | cna | hetloss | BASIS    |
| PD13296      | FANCE | cna | gain    | BASIS    |
| PD13299      | FANCE | cna | gain    | BASIS    |
| PD23562      | FANCE | cna | gain    | BASIS    |
| PD24186      | FANCE | cna | gain    | BASIS    |
| PD24206      | FANCE | cna | gain    | BASIS    |
| PD3905       | FANCE | cna | gain    | BASIS    |
| PD4006       | FANCE | cna | gain    | BASIS    |
| PD4107       | FANCE | cna | gain    | BASIS    |
| PD4826       | FANCE | cna | gain    | BASIS    |
| PD5935       | FANCE | cna | gain    | BASIS    |
| PD5945       | FANCE | cna | amp     | BASIS    |
| PD5948       | FANCE | cna | gain    | BASIS    |
| PD6731       | FANCE | cna | hetloss | BASIS    |
| PD7067       | FANCE | cna | amp     | BASIS    |
| PD7215       | FANCE | cna | gain    | BASIS    |
| PD8621       | FANCE | cna | amp     | BASIS    |
| PD9585       | FANCE | cna | gain    | BASIS    |
| PD9702       | FANCE | cna | gain    | BASIS    |
| TCGA-A2-A25B | HGF   | cna | hetloss | TCGA     |
| TCGA-AN-A0XU | HGF   | cna | hetloss | TCGA     |
| TCGA-AO-A0JL | HGF   | cna | gain    | TCGA     |
| TCGA-BH-A0AW | HGF   | cna | gain    | TCGA     |
| TCGA-C8-A12L | HGF   | cna | hetloss | TCGA     |
| TCGA-D8-A27M | HGF   | cna | gain    | TCGA     |
| TCGA-E9-A1NC | HGF   | cna | gain    | TCGA     |
| MB-0346      | HGF   | cna | hetloss | METABRIC |
| MB-5465      | HGF   | cna | gain    | METABRIC |
| PD11327      | HGF   | cna | amp     | BASIS    |
| PD13296      | HGF   | cna | hetloss | BASIS    |
| PD23562      | HGF   | cna | gain    | BASIS    |



|              |        |     |         |          |
|--------------|--------|-----|---------|----------|
| PD23574      | HGF    | cna | gain    | BASIS    |
| PD24186      | HGF    | cna | amp     | BASIS    |
| PD3890       | HGF    | cna | hetloss | BASIS    |
| PD3905       | HGF    | cna | gain    | BASIS    |
| PD4006       | HGF    | cna | gain    | BASIS    |
| PD4107       | HGF    | cna | gain    | BASIS    |
| PD4826       | HGF    | cna | gain    | BASIS    |
| PD5930       | HGF    | cna | gain    | BASIS    |
| PD5935       | HGF    | cna | gain    | BASIS    |
| PD5945       | HGF    | cna | amp     | BASIS    |
| PD5948       | HGF    | cna | gain    | BASIS    |
| PD6406       | HGF    | cna | hetloss | BASIS    |
| PD7215       | HGF    | cna | gain    | BASIS    |
| PD9004       | HGF    | cna | gain    | BASIS    |
| PD9702       | HGF    | cna | gain    | BASIS    |
| TCGA-AN-A0XU | HMGA1  | cna | gain    | TCGA     |
| TCGA-AO-A0JL | HMGA1  | cna | gain    | TCGA     |
| TCGA-BH-A0AW | HMGA1  | cna | gain    | TCGA     |
| TCGA-BH-A0C0 | HMGA1  | cna | hetloss | TCGA     |
| TCGA-C8-A12L | HMGA1  | cna | hetloss | TCGA     |
| TCGA-E2-A1L7 | HMGA1  | cna | hetloss | TCGA     |
| TCGA-E9-A1NC | HMGA1  | cna | amp     | TCGA     |
| MB-7032      | HMGA1  | cna | gain    | METABRIC |
| PD11327      | HMGA1  | cna | hetloss | BASIS    |
| PD13296      | HMGA1  | cna | gain    | BASIS    |
| PD13299      | HMGA1  | cna | gain    | BASIS    |
| PD23562      | HMGA1  | cna | gain    | BASIS    |
| PD24186      | HMGA1  | cna | gain    | BASIS    |
| PD24206      | HMGA1  | cna | gain    | BASIS    |
| PD3905       | HMGA1  | cna | gain    | BASIS    |
| PD4006       | HMGA1  | cna | gain    | BASIS    |
| PD4107       | HMGA1  | cna | gain    | BASIS    |
| PD4826       | HMGA1  | cna | gain    | BASIS    |
| PD5935       | HMGA1  | cna | gain    | BASIS    |
| PD5945       | HMGA1  | cna | amp     | BASIS    |
| PD5948       | HMGA1  | cna | gain    | BASIS    |
| PD6731       | HMGA1  | cna | hetloss | BASIS    |
| PD7067       | HMGA1  | cna | amp     | BASIS    |
| PD7215       | HMGA1  | cna | gain    | BASIS    |
| PD8621       | HMGA1  | cna | amp     | BASIS    |
| PD9585       | HMGA1  | cna | gain    | BASIS    |
| PD9702       | HMGA1  | cna | amp     | BASIS    |
| TCGA-AN-A0XU | INPP4A | cna | gain    | TCGA     |
| TCGA-AO-A0JL | INPP4A | cna | gain    | TCGA     |
| TCGA-D8-A27M | INPP4A | cna | gain    | TCGA     |
| TCGA-LL-A5YP | INPP4A | cna | amp     | TCGA     |
| MB-6060      | INPP4A | cna | gain    | METABRIC |

|              |        |     |         |          |
|--------------|--------|-----|---------|----------|
| MB-6098      | INPP4A | cna | gain    | METABRIC |
| MB-6271      | INPP4A | cna | hetloss | METABRIC |
| PD11327      | INPP4A | cna | gain    | BASIS    |
| PD13297      | INPP4A | cna | hetloss | BASIS    |
| PD13299      | INPP4A | cna | gain    | BASIS    |
| PD23562      | INPP4A | cna | amp     | BASIS    |
| PD23578      | INPP4A | cna | gain    | BASIS    |
| PD24186      | INPP4A | cna | gain    | BASIS    |
| PD24206      | INPP4A | cna | gain    | BASIS    |
| PD24337      | INPP4A | cna | gain    | BASIS    |
| PD3905       | INPP4A | cna | gain    | BASIS    |
| PD4005       | INPP4A | cna | hetloss | BASIS    |
| PD4107       | INPP4A | cna | gain    | BASIS    |
| PD4967       | INPP4A | cna | hetloss | BASIS    |
| PD5930       | INPP4A | cna | hetloss | BASIS    |
| PD5945       | INPP4A | cna | amp     | BASIS    |
| PD5948       | INPP4A | cna | gain    | BASIS    |
| PD7067       | INPP4A | cna | gain    | BASIS    |
| PD7215       | INPP4A | cna | gain    | BASIS    |
| PD8621       | INPP4A | cna | gain    | BASIS    |
| PD9004       | INPP4A | cna | gain    | BASIS    |
| PD9702       | INPP4A | cna | gain    | BASIS    |
| TCGA-AN-A0XU | MAP4K4 | cna | gain    | TCGA     |
| TCGA-AO-A0JL | MAP4K4 | cna | gain    | TCGA     |
| TCGA-D8-A27M | MAP4K4 | cna | gain    | TCGA     |
| TCGA-LL-A5YP | MAP4K4 | cna | gain    | TCGA     |
| MB-5465      | MAP4K4 | cna | hetloss | METABRIC |
| MB-6060      | MAP4K4 | cna | amp     | METABRIC |
| MB-6271      | MAP4K4 | cna | hetloss | METABRIC |
| PD11327      | MAP4K4 | cna | gain    | BASIS    |
| PD13296      | MAP4K4 | cna | gain    | BASIS    |
| PD13297      | MAP4K4 | cna | hetloss | BASIS    |
| PD13299      | MAP4K4 | cna | gain    | BASIS    |
| PD23562      | MAP4K4 | cna | amp     | BASIS    |
| PD23578      | MAP4K4 | cna | gain    | BASIS    |
| PD24186      | MAP4K4 | cna | gain    | BASIS    |
| PD24206      | MAP4K4 | cna | gain    | BASIS    |
| PD3905       | MAP4K4 | cna | gain    | BASIS    |
| PD4005       | MAP4K4 | cna | hetloss | BASIS    |
| PD4107       | MAP4K4 | cna | gain    | BASIS    |
| PD4967       | MAP4K4 | cna | hetloss | BASIS    |
| PD5945       | MAP4K4 | cna | amp     | BASIS    |
| PD5948       | MAP4K4 | cna | gain    | BASIS    |
| PD7067       | MAP4K4 | cna | gain    | BASIS    |
| PD7215       | MAP4K4 | cna | gain    | BASIS    |
| PD8621       | MAP4K4 | cna | gain    | BASIS    |
| PD8980       | MAP4K4 | cna | homdel  | BASIS    |

|              |        |     |         |          |
|--------------|--------|-----|---------|----------|
| PD9004       | MAP4K4 | cna | gain    | BASIS    |
| PD9702       | MAP4K4 | cna | gain    | BASIS    |
| TCGA-A2-A25B | SDHAF2 | cna | gain    | TCGA     |
| TCGA-AN-A0XU | SDHAF2 | cna | hetloss | TCGA     |
| TCGA-AO-A0JL | SDHAF2 | cna | hetloss | TCGA     |
| TCGA-BH-A18R | SDHAF2 | cna | homdel  | TCGA     |
| TCGA-EW-A10X | SDHAF2 | cna | amp     | TCGA     |
| TCGA-LL-A5YP | SDHAF2 | cna | hetloss | TCGA     |
| MB-0346      | SDHAF2 | cna | gain    | METABRIC |
| MB-6060      | SDHAF2 | cna | gain    | METABRIC |
| MB-6098      | SDHAF2 | cna | hetloss | METABRIC |
| MB-6271      | SDHAF2 | cna | hetloss | METABRIC |
| PD11327      | SDHAF2 | cna | hetloss | BASIS    |
| PD13771      | SDHAF2 | cna | hetloss | BASIS    |
| PD24186      | SDHAF2 | cna | gain    | BASIS    |
| PD24202      | SDHAF2 | cna | hetloss | BASIS    |
| PD24206      | SDHAF2 | cna | gain    | BASIS    |
| PD3905       | SDHAF2 | cna | gain    | BASIS    |
| PD4006       | SDHAF2 | cna | gain    | BASIS    |
| PD4826       | SDHAF2 | cna | gain    | BASIS    |
| PD5935       | SDHAF2 | cna | gain    | BASIS    |
| PD5945       | SDHAF2 | cna | amp     | BASIS    |
| PD5948       | SDHAF2 | cna | gain    | BASIS    |
| PD6413       | SDHAF2 | cna | gain    | BASIS    |
| PD7067       | SDHAF2 | cna | gain    | BASIS    |
| PD7215       | SDHAF2 | cna | gain    | BASIS    |
| PD8621       | SDHAF2 | cna | gain    | BASIS    |
| PD8980       | SDHAF2 | cna | hetloss | BASIS    |
| PD9702       | SDHAF2 | cna | gain    | BASIS    |
| TCGA-AN-A0XU | AFF3   | cna | gain    | TCGA     |
| TCGA-AO-A0JL | AFF3   | cna | gain    | TCGA     |
| TCGA-D8-A27M | AFF3   | cna | gain    | TCGA     |
| TCGA-LL-A5YP | AFF3   | cna | amp     | TCGA     |
| MB-5465      | AFF3   | cna | hetloss | METABRIC |
| MB-6060      | AFF3   | cna | amp     | METABRIC |
| MB-6271      | AFF3   | cna | hetloss | METABRIC |
| PD11327      | AFF3   | cna | gain    | BASIS    |
| PD13296      | AFF3   | cna | gain    | BASIS    |
| PD13297      | AFF3   | cna | hetloss | BASIS    |
| PD13299      | AFF3   | cna | gain    | BASIS    |
| PD23562      | AFF3   | cna | amp     | BASIS    |
| PD23578      | AFF3   | cna | gain    | BASIS    |
| PD24186      | AFF3   | cna | gain    | BASIS    |
| PD24206      | AFF3   | cna | gain    | BASIS    |
| PD3905       | AFF3   | cna | gain    | BASIS    |
| PD4005       | AFF3   | cna | hetloss | BASIS    |
| PD4107       | AFF3   | cna | gain    | BASIS    |

|              |       |     |         |          |
|--------------|-------|-----|---------|----------|
| PD4967       | AFF3  | cna | hetloss | BASIS    |
| PD5945       | AFF3  | cna | amp     | BASIS    |
| PD5948       | AFF3  | cna | gain    | BASIS    |
| PD7067       | AFF3  | cna | gain    | BASIS    |
| PD7215       | AFF3  | cna | gain    | BASIS    |
| PD8621       | AFF3  | cna | gain    | BASIS    |
| PD9004       | AFF3  | cna | gain    | BASIS    |
| PD9702       | AFF3  | cna | gain    | BASIS    |
| TCGA-A2-A25B | IKZF1 | cna | gain    | TCGA     |
| TCGA-AN-A0XU | IKZF1 | cna | hetloss | TCGA     |
| TCGA-AO-A0JL | IKZF1 | cna | gain    | TCGA     |
| TCGA-BH-A0AW | IKZF1 | cna | gain    | TCGA     |
| TCGA-BH-A0C0 | IKZF1 | cna | hetloss | TCGA     |
| TCGA-C8-A12L | IKZF1 | cna | gain    | TCGA     |
| TCGA-D8-A27M | IKZF1 | cna | gain    | TCGA     |
| TCGA-LL-A5YP | IKZF1 | cna | hetloss | TCGA     |
| MB-0346      | IKZF1 | cna | hetloss | METABRIC |
| MB-2827      | IKZF1 | cna | hetloss | METABRIC |
| MB-6098      | IKZF1 | cna | hetloss | METABRIC |
| MB-0420      | IKZF1 | cna | hetloss | METABRIC |
| PD11327      | IKZF1 | cna | gain    | BASIS    |
| PD24186      | IKZF1 | cna | gain    | BASIS    |
| PD24202      | IKZF1 | cna | hetloss | BASIS    |
| PD24206      | IKZF1 | cna | gain    | BASIS    |
| PD3905       | IKZF1 | cna | gain    | BASIS    |
| PD4006       | IKZF1 | cna | gain    | BASIS    |
| PD4107       | IKZF1 | cna | gain    | BASIS    |
| PD4826       | IKZF1 | cna | gain    | BASIS    |
| PD5930       | IKZF1 | cna | gain    | BASIS    |
| PD5945       | IKZF1 | cna | amp     | BASIS    |
| PD6406       | IKZF1 | cna | hetloss | BASIS    |
| PD6413       | IKZF1 | cna | gain    | BASIS    |
| PD7215       | IKZF1 | cna | gain    | BASIS    |
| PD8621       | IKZF1 | cna | gain    | BASIS    |
| TCGA-A2-A25B | PCLO  | cna | hetloss | TCGA     |
| TCGA-AN-A0XU | PCLO  | cna | hetloss | TCGA     |
| TCGA-AO-A0JL | PCLO  | cna | gain    | TCGA     |
| TCGA-BH-A0AW | PCLO  | cna | gain    | TCGA     |
| TCGA-C8-A12L | PCLO  | cna | hetloss | TCGA     |
| TCGA-D8-A27M | PCLO  | cna | gain    | TCGA     |
| TCGA-E9-A1NC | PCLO  | cna | gain    | TCGA     |
| MB-0346      | PCLO  | cna | hetloss | METABRIC |
| MB-5465      | PCLO  | cna | gain    | METABRIC |
| PD11327      | PCLO  | cna | gain    | BASIS    |
| PD13296      | PCLO  | cna | hetloss | BASIS    |
| PD23574      | PCLO  | cna | gain    | BASIS    |
| PD24186      | PCLO  | cna | amp     | BASIS    |

|              |       |     |         |          |
|--------------|-------|-----|---------|----------|
| PD3890       | PCLO  | cna | hetloss | BASIS    |
| PD3905       | PCLO  | cna | gain    | BASIS    |
| PD4006       | PCLO  | cna | gain    | BASIS    |
| PD4107       | PCLO  | cna | gain    | BASIS    |
| PD4826       | PCLO  | cna | gain    | BASIS    |
| PD5930       | PCLO  | cna | gain    | BASIS    |
| PD5935       | PCLO  | cna | gain    | BASIS    |
| PD5945       | PCLO  | cna | amp     | BASIS    |
| PD5948       | PCLO  | cna | gain    | BASIS    |
| PD6406       | PCLO  | cna | hetloss | BASIS    |
| PD7215       | PCLO  | cna | gain    | BASIS    |
| PD9004       | PCLO  | cna | gain    | BASIS    |
| PD9702       | PCLO  | cna | gain    | BASIS    |
| TCGA-A2-A25B | GRM3  | cna | hetloss | TCGA     |
| TCGA-AN-A0XU | GRM3  | cna | hetloss | TCGA     |
| TCGA-AO-A0JL | GRM3  | cna | gain    | TCGA     |
| TCGA-BH-A0AW | GRM3  | cna | gain    | TCGA     |
| TCGA-C8-A12L | GRM3  | cna | hetloss | TCGA     |
| TCGA-D8-A27M | GRM3  | cna | gain    | TCGA     |
| TCGA-E2-A1L7 | GRM3  | cna | hetloss | TCGA     |
| TCGA-E9-A1NC | GRM3  | cna | gain    | TCGA     |
| MB-0346      | GRM3  | cna | hetloss | METABRIC |
| PD11327      | GRM3  | cna | gain    | BASIS    |
| PD13296      | GRM3  | cna | hetloss | BASIS    |
| PD23574      | GRM3  | cna | gain    | BASIS    |
| PD24186      | GRM3  | cna | amp     | BASIS    |
| PD3890       | GRM3  | cna | hetloss | BASIS    |
| PD3905       | GRM3  | cna | gain    | BASIS    |
| PD4006       | GRM3  | cna | gain    | BASIS    |
| PD4107       | GRM3  | cna | gain    | BASIS    |
| PD4826       | GRM3  | cna | gain    | BASIS    |
| PD5930       | GRM3  | cna | gain    | BASIS    |
| PD5935       | GRM3  | cna | gain    | BASIS    |
| PD5945       | GRM3  | cna | amp     | BASIS    |
| PD5948       | GRM3  | cna | gain    | BASIS    |
| PD7215       | GRM3  | cna | gain    | BASIS    |
| PD9004       | GRM3  | cna | gain    | BASIS    |
| PD9702       | GRM3  | cna | gain    | BASIS    |
| MB-5465      | HLA-A | cna | gain    | METABRIC |
| MB-6098      | HLA-A | cna | hetloss | METABRIC |
| MB-7032      | HLA-A | cna | gain    | METABRIC |
| MB-7038      | HLA-A | cna | gain    | METABRIC |
| PD11327      | HLA-A | cna | hetloss | BASIS    |
| PD13296      | HLA-A | cna | gain    | BASIS    |
| PD13299      | HLA-A | cna | gain    | BASIS    |
| PD23562      | HLA-A | cna | gain    | BASIS    |
| PD24186      | HLA-A | cna | gain    | BASIS    |

|              |          |     |         |          |
|--------------|----------|-----|---------|----------|
| PD24206      | HLA-A    | cna | gain    | BASIS    |
| PD3905       | HLA-A    | cna | gain    | BASIS    |
| PD4005       | HLA-A    | cna | amp     | BASIS    |
| PD4006       | HLA-A    | cna | gain    | BASIS    |
| PD4107       | HLA-A    | cna | gain    | BASIS    |
| PD4826       | HLA-A    | cna | gain    | BASIS    |
| PD5935       | HLA-A    | cna | gain    | BASIS    |
| PD5945       | HLA-A    | cna | amp     | BASIS    |
| PD5948       | HLA-A    | cna | gain    | BASIS    |
| PD6731       | HLA-A    | cna | hetloss | BASIS    |
| PD7067       | HLA-A    | cna | amp     | BASIS    |
| PD7215       | HLA-A    | cna | gain    | BASIS    |
| PD8621       | HLA-A    | cna | gain    | BASIS    |
| PD9004       | HLA-A    | cna | gain    | BASIS    |
| PD9585       | HLA-A    | cna | gain    | BASIS    |
| PD9702       | HLA-A    | cna | gain    | BASIS    |
| TCGA-AN-A0XU | TTL      | cna | hetloss | TCGA     |
| TCGA-AO-A0JL | TTL      | cna | gain    | TCGA     |
| TCGA-D8-A27M | TTL      | cna | gain    | TCGA     |
| TCGA-LL-A5YP | TTL      | cna | gain    | TCGA     |
| MB-5465      | TTL      | cna | hetloss | METABRIC |
| MB-6271      | TTL      | cna | hetloss | METABRIC |
| PD13297      | TTL      | cna | hetloss | BASIS    |
| PD13299      | TTL      | cna | gain    | BASIS    |
| PD23578      | TTL      | cna | hetloss | BASIS    |
| PD24186      | TTL      | cna | gain    | BASIS    |
| PD24202      | TTL      | cna | hetloss | BASIS    |
| PD24206      | TTL      | cna | gain    | BASIS    |
| PD3905       | TTL      | cna | gain    | BASIS    |
| PD4005       | TTL      | cna | hetloss | BASIS    |
| PD4107       | TTL      | cna | gain    | BASIS    |
| PD4967       | TTL      | cna | hetloss | BASIS    |
| PD5945       | TTL      | cna | gain    | BASIS    |
| PD5948       | TTL      | cna | gain    | BASIS    |
| PD6413       | TTL      | cna | hetloss | BASIS    |
| PD7067       | TTL      | cna | gain    | BASIS    |
| PD7215       | TTL      | cna | gain    | BASIS    |
| PD8621       | TTL      | cna | gain    | BASIS    |
| PD9004       | TTL      | cna | gain    | BASIS    |
| PD9585       | TTL      | cna | hetloss | BASIS    |
| PD9702       | TTL      | cna | gain    | BASIS    |
| PD10014      | TMSB4XP8 | cna | gain    | BASIS    |
| PD13296      | TMSB4XP8 | cna | hetloss | BASIS    |
| PD13297      | TMSB4XP8 | cna | hetloss | BASIS    |
| PD13771      | TMSB4XP8 | cna | gain    | BASIS    |
| PD22355      | TMSB4XP8 | cna | hetloss | BASIS    |
| PD23562      | TMSB4XP8 | cna | gain    | BASIS    |

|         |          |     |         |          |
|---------|----------|-----|---------|----------|
| PD23578 | TMSB4XP8 | cna | hetloss | BASIS    |
| PD24202 | TMSB4XP8 | cna | hetloss | BASIS    |
| PD24206 | TMSB4XP8 | cna | gain    | BASIS    |
| PD3890  | TMSB4XP8 | cna | gain    | BASIS    |
| PD3905  | TMSB4XP8 | cna | gain    | BASIS    |
| PD4006  | TMSB4XP8 | cna | hetloss | BASIS    |
| PD4107  | TMSB4XP8 | cna | gain    | BASIS    |
| PD5930  | TMSB4XP8 | cna | hetloss | BASIS    |
| PD5935  | TMSB4XP8 | cna | gain    | BASIS    |
| PD5945  | TMSB4XP8 | cna | gain    | BASIS    |
| PD5948  | TMSB4XP8 | cna | gain    | BASIS    |
| PD6406  | TMSB4XP8 | cna | gain    | BASIS    |
| PD6731  | TMSB4XP8 | cna | hetloss | BASIS    |
| PD7067  | TMSB4XP8 | cna | gain    | BASIS    |
| PD7215  | TMSB4XP8 | cna | gain    | BASIS    |
| PD8621  | TMSB4XP8 | cna | hetloss | BASIS    |
| PD8980  | TMSB4XP8 | cna | hetloss | BASIS    |
| PD9585  | TMSB4XP8 | cna | hetloss | BASIS    |
| PD10014 | CRLF2    | cna | hetloss | BASIS    |
| PD11742 | CRLF2    | cna | gain    | BASIS    |
| PD13771 | CRLF2    | cna | hetloss | BASIS    |
| PD23562 | CRLF2    | cna | hetloss | BASIS    |
| PD23574 | CRLF2    | cna | gain    | BASIS    |
| PD24206 | CRLF2    | cna | gain    | BASIS    |
| PD3890  | CRLF2    | cna | hetloss | BASIS    |
| PD3905  | CRLF2    | cna | amp     | BASIS    |
| PD4005  | CRLF2    | cna | hetloss | BASIS    |
| PD4006  | CRLF2    | cna | hetloss | BASIS    |
| PD4107  | CRLF2    | cna | hetloss | BASIS    |
| PD4826  | CRLF2    | cna | gain    | BASIS    |
| PD4967  | CRLF2    | cna | hetloss | BASIS    |
| PD5930  | CRLF2    | cna | hetloss | BASIS    |
| PD5935  | CRLF2    | cna | gain    | BASIS    |
| PD5945  | CRLF2    | cna | hetloss | BASIS    |
| PD5948  | CRLF2    | cna | hetloss | BASIS    |
| PD6406  | CRLF2    | cna | gain    | BASIS    |
| PD7067  | CRLF2    | cna | gain    | BASIS    |
| PD7215  | CRLF2    | cna | gain    | BASIS    |
| PD8621  | CRLF2    | cna | gain    | BASIS    |
| PD8980  | CRLF2    | cna | hetloss | BASIS    |
| PD9004  | CRLF2    | cna | gain    | BASIS    |
| MB-6098 | HLA-B    | cna | hetloss | METABRIC |
| MB-7032 | HLA-B    | cna | gain    | METABRIC |
| PD10014 | HLA-B    | cna | hetloss | BASIS    |
| PD11327 | HLA-B    | cna | hetloss | BASIS    |
| PD13296 | HLA-B    | cna | gain    | BASIS    |
| PD13299 | HLA-B    | cna | gain    | BASIS    |

|              |       |     |         |          |
|--------------|-------|-----|---------|----------|
| PD23562      | HLA-B | cna | gain    | BASIS    |
| PD24186      | HLA-B | cna | gain    | BASIS    |
| PD24206      | HLA-B | cna | gain    | BASIS    |
| PD3905       | HLA-B | cna | gain    | BASIS    |
| PD4006       | HLA-B | cna | gain    | BASIS    |
| PD4107       | HLA-B | cna | gain    | BASIS    |
| PD4826       | HLA-B | cna | gain    | BASIS    |
| PD5935       | HLA-B | cna | gain    | BASIS    |
| PD5945       | HLA-B | cna | amp     | BASIS    |
| PD5948       | HLA-B | cna | gain    | BASIS    |
| PD6731       | HLA-B | cna | hetloss | BASIS    |
| PD7067       | HLA-B | cna | amp     | BASIS    |
| PD7215       | HLA-B | cna | gain    | BASIS    |
| PD8621       | HLA-B | cna | amp     | BASIS    |
| PD9004       | HLA-B | cna | gain    | BASIS    |
| PD9585       | HLA-B | cna | gain    | BASIS    |
| PD9702       | HLA-B | cna | amp     | BASIS    |
| TCGA-AO-A0JL | PAX8  | cna | gain    | TCGA     |
| TCGA-D8-A27M | PAX8  | cna | gain    | TCGA     |
| TCGA-LL-A5YP | PAX8  | cna | gain    | TCGA     |
| MB-5465      | PAX8  | cna | hetloss | METABRIC |
| MB-6271      | PAX8  | cna | hetloss | METABRIC |
| PD11742      | PAX8  | cna | gain    | BASIS    |
| PD13297      | PAX8  | cna | hetloss | BASIS    |
| PD13299      | PAX8  | cna | gain    | BASIS    |
| PD23578      | PAX8  | cna | hetloss | BASIS    |
| PD24186      | PAX8  | cna | gain    | BASIS    |
| PD24202      | PAX8  | cna | hetloss | BASIS    |
| PD24206      | PAX8  | cna | gain    | BASIS    |
| PD3905       | PAX8  | cna | gain    | BASIS    |
| PD4107       | PAX8  | cna | gain    | BASIS    |
| PD4967       | PAX8  | cna | hetloss | BASIS    |
| PD5945       | PAX8  | cna | gain    | BASIS    |
| PD5948       | PAX8  | cna | gain    | BASIS    |
| PD6413       | PAX8  | cna | hetloss | BASIS    |
| PD7067       | PAX8  | cna | gain    | BASIS    |
| PD7215       | PAX8  | cna | gain    | BASIS    |
| PD8621       | PAX8  | cna | gain    | BASIS    |
| PD9004       | PAX8  | cna | gain    | BASIS    |
| PD9702       | PAX8  | cna | gain    | BASIS    |
| PD10014      | ASMTL | cna | hetloss | BASIS    |
| PD11742      | ASMTL | cna | gain    | BASIS    |
| PD13771      | ASMTL | cna | hetloss | BASIS    |
| PD23562      | ASMTL | cna | hetloss | BASIS    |
| PD23574      | ASMTL | cna | gain    | BASIS    |
| PD24206      | ASMTL | cna | gain    | BASIS    |
| PD3890       | ASMTL | cna | hetloss | BASIS    |



|         |       |     |         |       |
|---------|-------|-----|---------|-------|
| PD3905  | ASMTL | cna | amp     | BASIS |
| PD4005  | ASMTL | cna | hetloss | BASIS |
| PD4006  | ASMTL | cna | hetloss | BASIS |
| PD4107  | ASMTL | cna | hetloss | BASIS |
| PD4826  | ASMTL | cna | gain    | BASIS |
| PD4967  | ASMTL | cna | hetloss | BASIS |
| PD5930  | ASMTL | cna | hetloss | BASIS |
| PD5945  | ASMTL | cna | hetloss | BASIS |
| PD5948  | ASMTL | cna | hetloss | BASIS |
| PD6406  | ASMTL | cna | gain    | BASIS |
| PD7067  | ASMTL | cna | gain    | BASIS |
| PD7215  | ASMTL | cna | gain    | BASIS |
| PD8621  | ASMTL | cna | gain    | BASIS |
| PD8980  | ASMTL | cna | hetloss | BASIS |
| PD9004  | ASMTL | cna | gain    | BASIS |
| PD10014 | P2RY8 | cna | hetloss | BASIS |
| PD11742 | P2RY8 | cna | gain    | BASIS |
| PD13771 | P2RY8 | cna | hetloss | BASIS |
| PD23562 | P2RY8 | cna | hetloss | BASIS |
| PD23574 | P2RY8 | cna | gain    | BASIS |
| PD24206 | P2RY8 | cna | gain    | BASIS |
| PD3890  | P2RY8 | cna | hetloss | BASIS |
| PD3905  | P2RY8 | cna | amp     | BASIS |
| PD4005  | P2RY8 | cna | hetloss | BASIS |
| PD4006  | P2RY8 | cna | hetloss | BASIS |
| PD4107  | P2RY8 | cna | hetloss | BASIS |
| PD4826  | P2RY8 | cna | gain    | BASIS |
| PD4967  | P2RY8 | cna | hetloss | BASIS |
| PD5930  | P2RY8 | cna | hetloss | BASIS |
| PD5945  | P2RY8 | cna | hetloss | BASIS |
| PD5948  | P2RY8 | cna | hetloss | BASIS |
| PD6406  | P2RY8 | cna | gain    | BASIS |
| PD7067  | P2RY8 | cna | gain    | BASIS |
| PD7215  | P2RY8 | cna | gain    | BASIS |
| PD8621  | P2RY8 | cna | gain    | BASIS |
| PD8980  | P2RY8 | cna | hetloss | BASIS |
| PD9004  | P2RY8 | cna | gain    | BASIS |
